# Supplementary material
Source: PubMed Central journal article supplement (PMC3164572)
Supplement: NIHMS295690-supplement-1_si_001.pdf [file NIHMS295690-supplement-1_si_001.pdf]

## *Supporting Information*

# Engineering an Antibiotic to Fight Cancer: Optimization of the Novobiocin Scaffold to Produce Anti-Proliferative Agents

*Huiping Zhao,<sup>1,†</sup> Alison C. Donnelly,<sup>1,†</sup> Bhaskar Reddy Kusuma,<sup>†</sup> Gary E. L. Brandt,<sup>†</sup> Douglas Brown,<sup>§</sup> Roger A. Rajewski,<sup>^</sup> George Vielhauer,<sup>‡</sup> Jeffrey Holzbeierlein,<sup>‡</sup> Mark S. Cohen,<sup>‡</sup> and Brian S. J. Blagg<sup>\*,†</sup>*

Department of Medicinal Chemistry, 1251 Wescoe Hall Drive, Malott 4070, The University of Kansas, Lawrence, Kansas 66045-7563, Biotechnology Innovation & Optimization Center, 2099 Constant Avenue, The University of Kansas, Lawrence, KS 66047-2535, Department of Pharmaceutical Chemistry, 2095 Constant Avenue, The University of Kansas, Lawrence, Kansas 66047-2535, and Department of Urology, The University of Kansas Medical Center, 3901 Rainbow Blvd., Mail Stop 3016, Kansas City, Kansas 66160

**Table of Contents**

| <u>Description</u>                      | <u>Page</u> |
|-----------------------------------------|-------------|
| Experimental details.....               | S14-S107    |
| <sup>1</sup> H NMR of <b>6b</b> .....   | S108        |
| <sup>13</sup> C NMR of <b>6b</b> .....  | S109        |
| <sup>1</sup> H NMR of <b>6c</b> .....   | S110        |
| <sup>13</sup> C NMR of <b>6c</b> .....  | S111        |
| <sup>1</sup> H NMR of <b>8b</b> .....   | S112        |
| <sup>13</sup> C NMR of <b>8b</b> .....  | S113        |
| <sup>1</sup> H NMR of <b>8c</b> .....   | S114        |
| <sup>13</sup> C NMR of <b>8c</b> .....  | S115        |
| <sup>1</sup> H NMR of <b>12b</b> .....  | S116        |
| <sup>13</sup> C NMR of <b>12b</b> ..... | S117        |
| <sup>1</sup> H NMR of <b>12c</b> .....  | S118        |
| <sup>13</sup> C NMR of <b>12c</b> ..... | S119        |
| <sup>1</sup> H NMR of <b>14a</b> .....  | S120        |
| <sup>13</sup> C NMR of <b>14a</b> ..... | S121        |
| <sup>1</sup> H NMR of <b>14b</b> .....  | S122        |
| <sup>13</sup> C NMR of <b>14b</b> ..... | S123        |
| <sup>1</sup> H NMR of <b>14c</b> .....  | S124        |
| <sup>13</sup> C NMR of <b>14c</b> ..... | S125        |
| <sup>1</sup> H NMR of <b>15a</b> .....  | S126        |

|                                         |      |
|-----------------------------------------|------|
| <sup>13</sup> C NMR of <b>15a</b> ..... | S127 |
| <sup>1</sup> H NMR of <b>15b</b> .....  | S128 |
| <sup>13</sup> C NMR of <b>15b</b> ..... | S129 |
| <sup>1</sup> H NMR of <b>15c</b> .....  | S130 |
| <sup>13</sup> C NMR of <b>15c</b> ..... | S131 |
| <sup>1</sup> H NMR of <b>17a</b> .....  | S132 |
| <sup>13</sup> C NMR of <b>17a</b> ..... | S133 |
| <sup>1</sup> H NMR of <b>17a</b> .....  | S134 |
| <sup>13</sup> C NMR of <b>17a</b> ..... | S135 |
| <sup>1</sup> H NMR of <b>20a</b> .....  | S136 |
| <sup>13</sup> C NMR of <b>20a</b> ..... | S137 |
| <sup>1</sup> H NMR of <b>20b</b> .....  | S138 |
| <sup>13</sup> C NMR of <b>20b</b> ..... | S139 |
| <sup>1</sup> H NMR of <b>20c</b> .....  | S140 |
| <sup>13</sup> C NMR of <b>20c</b> ..... | S141 |
| <sup>1</sup> H NMR of <b>21a</b> .....  | S142 |
| <sup>13</sup> C NMR of <b>21a</b> ..... | S143 |
| <sup>1</sup> H NMR of <b>21c</b> .....  | S144 |
| <sup>13</sup> C NMR of <b>21c</b> ..... | S145 |
| <sup>1</sup> H NMR of <b>23a</b> .....  | S146 |
| <sup>13</sup> C NMR of <b>23a</b> ..... | S147 |
| <sup>1</sup> H NMR of <b>23b</b> .....  | S148 |
| <sup>13</sup> C NMR of <b>23b</b> ..... | S149 |

|                                         |      |
|-----------------------------------------|------|
| <sup>1</sup> H NMR of <b>23c</b> .....  | S150 |
| <sup>13</sup> C NMR of <b>23c</b> ..... | S151 |
| <sup>1</sup> H NMR of <b>25a</b> .....  | S152 |
| <sup>13</sup> C NMR of <b>25a</b> ..... | S153 |
| <sup>1</sup> H NMR of <b>25b</b> .....  | S154 |
| <sup>13</sup> C NMR of <b>25b</b> ..... | S155 |
| <sup>1</sup> H NMR of <b>25c</b> .....  | S156 |
| <sup>13</sup> C NMR of <b>25c</b> ..... | S157 |
| <sup>1</sup> H NMR of <b>27a</b> .....  | S158 |
| <sup>13</sup> C NMR of <b>27a</b> ..... | S159 |
| <sup>1</sup> H NMR of <b>27a</b> .....  | S160 |
| <sup>13</sup> C NMR of <b>27a</b> ..... | S161 |
| <sup>1</sup> H NMR of <b>30a</b> .....  | S162 |
| <sup>13</sup> C NMR of <b>30a</b> ..... | S163 |
| <sup>1</sup> H NMR of <b>31a</b> .....  | S164 |
| <sup>13</sup> C NMR of <b>31a</b> ..... | S165 |
| <sup>1</sup> H NMR of <b>33a</b> .....  | S166 |
| <sup>13</sup> C NMR of <b>33a</b> ..... | S167 |
| <sup>1</sup> H NMR of <b>40a</b> .....  | S168 |
| <sup>13</sup> C NMR of <b>40a</b> ..... | S169 |
| <sup>1</sup> H NMR of <b>40b</b> .....  | S170 |
| <sup>13</sup> C NMR of <b>40b</b> ..... | S171 |
| <sup>1</sup> H NMR of <b>40c</b> .....  | S172 |

|                                         |      |
|-----------------------------------------|------|
| <sup>13</sup> C NMR of <b>40c</b> ..... | S173 |
| <sup>1</sup> H NMR of <b>41a</b> .....  | S174 |
| <sup>13</sup> C NMR of <b>41a</b> ..... | S175 |
| <sup>1</sup> H NMR of <b>41b</b> .....  | S176 |
| <sup>13</sup> C NMR of <b>41b</b> ..... | S177 |
| <sup>1</sup> H NMR of <b>41c</b> .....  | S178 |
| <sup>13</sup> C NMR of <b>41c</b> ..... | S179 |
| <sup>1</sup> H NMR of <b>42a</b> .....  | S180 |
| <sup>13</sup> C NMR of <b>42a</b> ..... | S181 |
| <sup>1</sup> H NMR of <b>42b</b> .....  | S182 |
| <sup>13</sup> C NMR of <b>42b</b> ..... | S183 |
| <sup>1</sup> H NMR of <b>42c</b> .....  | S184 |
| <sup>13</sup> C NMR of <b>42c</b> ..... | S185 |
| <sup>1</sup> H NMR of <b>43a</b> .....  | S186 |
| <sup>13</sup> C NMR of <b>43a</b> ..... | S187 |
| <sup>1</sup> H NMR of <b>43b</b> .....  | S188 |
| <sup>13</sup> C NMR of <b>43b</b> ..... | S189 |
| <sup>1</sup> H NMR of <b>43c</b> .....  | S190 |
| <sup>13</sup> C NMR of <b>43c</b> ..... | S191 |
| <sup>1</sup> H NMR of <b>44a</b> .....  | S192 |
| <sup>13</sup> C NMR of <b>44a</b> ..... | S193 |
| <sup>1</sup> H NMR of <b>44b</b> .....  | S194 |
| <sup>13</sup> C NMR of <b>44b</b> ..... | S195 |

|                                         |      |
|-----------------------------------------|------|
| <sup>1</sup> H NMR of <b>44c</b> .....  | S196 |
| <sup>13</sup> C NMR of <b>44c</b> ..... | S197 |
| <sup>1</sup> H NMR of <b>45a</b> .....  | S198 |
| <sup>13</sup> C NMR of <b>45a</b> ..... | S199 |
| <sup>1</sup> H NMR of <b>45b</b> .....  | S200 |
| <sup>13</sup> C NMR of <b>45b</b> ..... | S201 |
| <sup>1</sup> H NMR of <b>45c</b> .....  | S202 |
| <sup>13</sup> C NMR of <b>45c</b> ..... | S203 |
| <sup>1</sup> H NMR of <b>48a</b> .....  | S204 |
| <sup>13</sup> C NMR of <b>48a</b> ..... | S205 |
| <sup>1</sup> H NMR of <b>48b</b> .....  | S206 |
| <sup>13</sup> C NMR of <b>48b</b> ..... | S207 |
| <sup>1</sup> H NMR of <b>48c</b> .....  | S208 |
| <sup>13</sup> C NMR of <b>48c</b> ..... | S209 |
| <sup>1</sup> H NMR of <b>50a</b> .....  | S210 |
| <sup>13</sup> C NMR of <b>50a</b> ..... | S211 |
| <sup>1</sup> H NMR of <b>51a</b> .....  | S212 |
| <sup>13</sup> C NMR of <b>51a</b> ..... | S213 |
| <sup>1</sup> H NMR of <b>51b</b> .....  | S214 |
| <sup>13</sup> C NMR of <b>51b</b> ..... | S215 |
| <sup>1</sup> H NMR of <b>51c</b> .....  | S216 |
| <sup>13</sup> C NMR of <b>51c</b> ..... | S217 |
| <sup>1</sup> H NMR of <b>52a</b> .....  | S218 |

|                                         |      |
|-----------------------------------------|------|
| <sup>13</sup> C NMR of <b>52a</b> ..... | S219 |
| <sup>1</sup> H NMR of <b>52b</b> .....  | S220 |
| <sup>13</sup> C NMR of <b>52b</b> ..... | S221 |
| <sup>1</sup> H NMR of <b>52c</b> .....  | S222 |
| <sup>13</sup> C NMR of <b>52c</b> ..... | S223 |
| <sup>1</sup> H NMR of <b>53a</b> .....  | S224 |
| <sup>13</sup> C NMR of <b>53a</b> ..... | S225 |
| <sup>1</sup> H NMR of <b>54a</b> .....  | S226 |
| <sup>13</sup> C NMR of <b>54a</b> ..... | S227 |
| <sup>1</sup> H NMR of <b>55a</b> .....  | S228 |
| <sup>13</sup> C NMR of <b>55a</b> ..... | S229 |
| <sup>1</sup> H NMR of <b>55b</b> .....  | S230 |
| <sup>13</sup> C NMR of <b>55b</b> ..... | S231 |
| <sup>1</sup> H NMR of <b>55c</b> .....  | S232 |
| <sup>13</sup> C NMR of <b>55c</b> ..... | S233 |
| <sup>1</sup> H NMR of <b>57a</b> .....  | S234 |
| <sup>13</sup> C NMR of <b>57a</b> ..... | S235 |
| <sup>1</sup> H NMR of <b>57b</b> .....  | S236 |
| <sup>13</sup> C NMR of <b>57b</b> ..... | S237 |
| <sup>1</sup> H NMR of <b>57c</b> .....  | S238 |
| <sup>13</sup> C NMR of <b>57c</b> ..... | S239 |
| <sup>1</sup> H NMR of <b>59a</b> .....  | S240 |
| <sup>13</sup> C NMR of <b>59a</b> ..... | S241 |

|                                         |      |
|-----------------------------------------|------|
| <sup>1</sup> H NMR of <b>59b</b> .....  | S242 |
| <sup>13</sup> C NMR of <b>59b</b> ..... | S243 |
| <sup>1</sup> H NMR of <b>59c</b> .....  | S244 |
| <sup>13</sup> C NMR of <b>59c</b> ..... | S245 |
| <sup>1</sup> H NMR of <b>60a</b> .....  | S246 |
| <sup>13</sup> C NMR of <b>60a</b> ..... | S247 |
| <sup>1</sup> H NMR of <b>60b</b> .....  | S248 |
| <sup>13</sup> C NMR of <b>60b</b> ..... | S249 |
| <sup>1</sup> H NMR of <b>60c</b> .....  | S250 |
| <sup>13</sup> C NMR of <b>60c</b> ..... | S251 |
| <sup>1</sup> H NMR of <b>61a</b> .....  | S252 |
| <sup>13</sup> C NMR of <b>61a</b> ..... | S253 |
| <sup>1</sup> H NMR of <b>61b</b> .....  | S254 |
| <sup>13</sup> C NMR of <b>61b</b> ..... | S255 |
| <sup>1</sup> H NMR of <b>61c</b> .....  | S256 |
| <sup>13</sup> C NMR of <b>61c</b> ..... | S257 |
| <sup>1</sup> H NMR of <b>64a</b> .....  | S258 |
| <sup>13</sup> C NMR of <b>64a</b> ..... | S259 |
| <sup>1</sup> H NMR of <b>64b</b> .....  | S260 |
| <sup>13</sup> C NMR of <b>64b</b> ..... | S261 |
| <sup>1</sup> H NMR of <b>64c</b> .....  | S262 |
| <sup>13</sup> C NMR of <b>64c</b> ..... | S263 |
| <sup>1</sup> H NMR of <b>65a</b> .....  | S264 |



|                                         |      |
|-----------------------------------------|------|
| <sup>13</sup> C NMR of <b>65a</b> ..... | S265 |
| <sup>1</sup> H NMR of <b>65b</b> .....  | S266 |
| <sup>13</sup> C NMR of <b>65b</b> ..... | S267 |
| <sup>1</sup> H NMR of <b>65c</b> .....  | S268 |
| <sup>13</sup> C NMR of <b>65c</b> ..... | S269 |
| <sup>1</sup> H NMR of <b>66a</b> .....  | S270 |
| <sup>13</sup> C NMR of <b>66a</b> ..... | S271 |
| <sup>1</sup> H NMR of <b>66b</b> .....  | S272 |
| <sup>13</sup> C NMR of <b>66b</b> ..... | S273 |
| <sup>1</sup> H NMR of <b>66c</b> .....  | S274 |
| <sup>13</sup> C NMR of <b>66c</b> ..... | S275 |
| <sup>1</sup> H NMR of <b>67a</b> .....  | S276 |
| <sup>13</sup> C NMR of <b>67a</b> ..... | S277 |
| <sup>1</sup> H NMR of <b>67b</b> .....  | S278 |
| <sup>13</sup> C NMR of <b>67b</b> ..... | S279 |
| <sup>1</sup> H NMR of <b>67c</b> .....  | S280 |
| <sup>13</sup> C NMR of <b>67c</b> ..... | S281 |
| <sup>1</sup> H NMR of <b>68a</b> .....  | S282 |
| <sup>13</sup> C NMR of <b>68a</b> ..... | S283 |
| <sup>1</sup> H NMR of <b>68b</b> .....  | S284 |
| <sup>13</sup> C NMR of <b>68b</b> ..... | S285 |
| <sup>1</sup> H NMR of <b>68c</b> .....  | S286 |
| <sup>13</sup> C NMR of <b>68c</b> ..... | S287 |

|                                         |      |
|-----------------------------------------|------|
| <sup>1</sup> H NMR of <b>69a</b> .....  | S288 |
| <sup>13</sup> C NMR of <b>69a</b> ..... | S289 |
| <sup>1</sup> H NMR of <b>69b</b> .....  | S290 |
| <sup>13</sup> C NMR of <b>69b</b> ..... | S291 |
| <sup>1</sup> H NMR of <b>69c</b> .....  | S292 |
| <sup>13</sup> C NMR of <b>69c</b> ..... | S293 |
| <sup>1</sup> H NMR of <b>70b</b> .....  | S294 |
| <sup>13</sup> C NMR of <b>70b</b> ..... | S295 |
| <sup>1</sup> H NMR of <b>70c</b> .....  | S296 |
| <sup>13</sup> C NMR of <b>70c</b> ..... | S297 |
| <sup>1</sup> H NMR of <b>71a</b> .....  | S298 |
| <sup>13</sup> C NMR of <b>71a</b> ..... | S299 |
| <sup>1</sup> H NMR of <b>71b</b> .....  | S300 |
| <sup>13</sup> C NMR of <b>71b</b> ..... | S301 |
| <sup>1</sup> H NMR of <b>71c</b> .....  | S302 |
| <sup>13</sup> C NMR of <b>71c</b> ..... | S303 |
| <sup>1</sup> H NMR of <b>72a</b> .....  | S304 |
| <sup>13</sup> C NMR of <b>72a</b> ..... | S305 |
| <sup>1</sup> H NMR of <b>72b</b> .....  | S306 |
| <sup>13</sup> C NMR of <b>72b</b> ..... | S307 |
| <sup>1</sup> H NMR of <b>72c</b> .....  | S308 |
| <sup>13</sup> C NMR of <b>72c</b> ..... | S309 |
| <sup>1</sup> H NMR of <b>73b</b> .....  | S310 |

|                                         |      |
|-----------------------------------------|------|
| <sup>13</sup> C NMR of <b>73b</b> ..... | S311 |
| <sup>1</sup> H NMR of <b>73c</b> .....  | S312 |
| <sup>13</sup> C NMR of <b>73c</b> ..... | S313 |
| <sup>1</sup> H NMR of <b>74b</b> .....  | S314 |
| <sup>13</sup> C NMR of <b>74b</b> ..... | S315 |
| <sup>1</sup> H NMR of <b>74c</b> .....  | S316 |
| <sup>13</sup> C NMR of <b>74c</b> ..... | S317 |
| <sup>1</sup> H NMR of <b>75a</b> .....  | S318 |
| <sup>13</sup> C NMR of <b>75a</b> ..... | S319 |
| <sup>1</sup> H NMR of <b>75b</b> .....  | S320 |
| <sup>13</sup> C NMR of <b>75b</b> ..... | S321 |
| <sup>1</sup> H NMR of <b>75c</b> .....  | S322 |
| <sup>13</sup> C NMR of <b>75c</b> ..... | S323 |
| <sup>1</sup> H NMR of <b>78a</b> .....  | S324 |
| <sup>13</sup> C NMR of <b>78a</b> ..... | S325 |
| <sup>1</sup> H NMR of <b>78b</b> .....  | S326 |
| <sup>13</sup> C NMR of <b>78b</b> ..... | S327 |
| <sup>1</sup> H NMR of <b>78c</b> .....  | S328 |
| <sup>13</sup> C NMR of <b>78c</b> ..... | S329 |
| <sup>1</sup> H NMR of <b>79a</b> .....  | S330 |
| <sup>13</sup> C NMR of <b>79a</b> ..... | S331 |
| <sup>1</sup> H NMR of <b>79b</b> .....  | S332 |
| <sup>13</sup> C NMR of <b>79b</b> ..... | S333 |

|                                         |      |
|-----------------------------------------|------|
| <sup>1</sup> H NMR of <b>79c</b> .....  | S334 |
| <sup>13</sup> C NMR of <b>79c</b> ..... | S335 |
| <sup>1</sup> H NMR of <b>80a</b> .....  | S336 |
| <sup>13</sup> C NMR of <b>80a</b> ..... | S337 |
| <sup>1</sup> H NMR of <b>80b</b> .....  | S338 |
| <sup>13</sup> C NMR of <b>80b</b> ..... | S339 |
| <sup>1</sup> H NMR of <b>80c</b> .....  | S340 |
| <sup>13</sup> C NMR of <b>80c</b> ..... | S341 |
| <sup>1</sup> H NMR of <b>81a</b> .....  | S342 |
| <sup>13</sup> C NMR of <b>81a</b> ..... | S343 |
| <sup>1</sup> H NMR of <b>81b</b> .....  | S344 |
| <sup>13</sup> C NMR of <b>81b</b> ..... | S345 |
| <sup>1</sup> H NMR of <b>81c</b> .....  | S346 |
| <sup>13</sup> C NMR of <b>81c</b> ..... | S347 |
| <sup>1</sup> H NMR of <b>82a</b> .....  | S348 |
| <sup>13</sup> C NMR of <b>82a</b> ..... | S349 |
| <sup>1</sup> H NMR of <b>82b</b> .....  | S350 |
| <sup>13</sup> C NMR of <b>82b</b> ..... | S351 |
| <sup>1</sup> H NMR of <b>82c</b> .....  | S352 |
| <sup>13</sup> C NMR of <b>82c</b> ..... | S353 |
| <sup>1</sup> H NMR of <b>83a</b> .....  | S354 |
| <sup>13</sup> C NMR of <b>83a</b> ..... | S355 |
| <sup>1</sup> H NMR of <b>83b</b> .....  | S356 |

|                                         |      |
|-----------------------------------------|------|
| <sup>13</sup> C NMR of <b>83b</b> ..... | S357 |
| <sup>1</sup> H NMR of <b>83c</b> .....  | S358 |
| <sup>13</sup> C NMR of <b>83c</b> ..... | S359 |
| <sup>1</sup> H NMR of <b>84a</b> .....  | S360 |
| <sup>13</sup> C NMR of <b>84a</b> ..... | S361 |
| <sup>1</sup> H NMR of <b>84b</b> .....  | S362 |
| <sup>13</sup> C NMR of <b>84b</b> ..... | S363 |
| <sup>1</sup> H NMR of <b>84c</b> .....  | S364 |
| <sup>13</sup> C NMR of <b>84c</b> ..... | S365 |

**General.** The purity of all compounds was determined to be >95% as determined by  $^1\text{H}$  and  $^{13}\text{C}$  NMRR spectra, unless otherwise noted. The most active 15 compounds were further verified for >95% purity based on HPLC analyses.

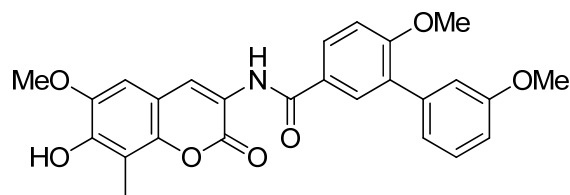

**N-(7-hydroxy-6-methoxy-8-methyl-2-oxo-2H-chromen-3-yl)-3',6-dimethoxy-[1,1'-biphenyl]-3-carboxamide (6b):** A solution of **10b** (174 mg, 0.35 mmol) in methanol (3.5 mL) at rt was treated with triethylamine (0.35 mL). After 12 h, the solvent was removed and the residue purified via column chromatography ( $\text{SiO}_2$ , 10:1,  $\text{CH}_2\text{Cl}_2$ :acetone) to afford **1b** as a yellow amorphous solid (158 g, 99%):  $^1\text{H}$  NMR ( $\text{CDCl}_3$ , 500 MHz)  $\delta$  8.79 (s, 1H), 8.71 (s, 1H), 7.92 (dd,  $J = 8.5, 2.5$  Hz, 1H), 7.89 (d,  $J = 2.5$  Hz, 1H), 7.37 (t,  $J = 8.0$  Hz, 1H), 7.14–7.06 (m, 3H), 6.94–6.92 (m, 1H), 6.81 (s, 1H), 6.11 (s, 1H), 3.96 (s, 3H), 3.90 (s, 3H), 3.86 (s, 3H), 2.37 (s, 3H);  $^{13}\text{C}$  NMR ( $\text{CDCl}_3$ , 125 MHz)  $\delta$  165.7, 159.9, 159.7, 159.5, 146.2, 144.5, 144.2, 138.8, 131.1, 130.1, 129.3, 128.3, 126.3, 124.7, 122.2, 122.0, 115.4, 113.3, 112.3, 111.9, 111.1, 104.5, 56.5, 56.0, 55.5, 8.3; IR (film)  $\nu_{\text{max}}$  3408, 2980, 2843, 2359, 2341, 1636, 1533, 1356, 1244, 1015, 918; HRMS (ESI $^+$ )  $m/z$ :  $[\text{M} + \text{H}^+]$  calcd for  $\text{C}_{26}\text{H}_{24}\text{NO}_7$ , 462.1553; found, 462.1529.

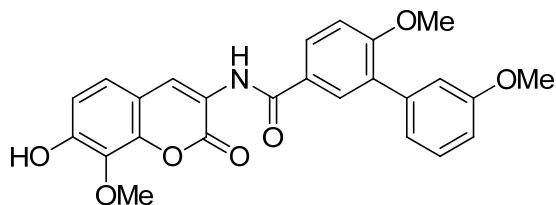

**N-(7-hydroxy-8-methoxy-2-oxo-2H-chromen-3-yl)-3',6-dimethoxy-[1,1'-biphenyl]-3-carboxamide (6c):** A solution of **12c** (63 mg, 0.13 mmol) in methanol (1.3 mL) at rt was treated

with triethylamine (0.13 mL). After 12 h, the solvent was removed and the residue purified via column chromatography (SiO<sub>2</sub>, 10:1, CH<sub>2</sub>Cl<sub>2</sub>:acetone) to afford **6c** as a yellow amorphous solid (57 mg, 99%): <sup>1</sup>H NMR (CDCl<sub>3</sub>, 500 MHz) δ 8.82 (s, 1H), 8.66 (s, 1H), 7.92 (dd, *J* = 8.5, 2.5 Hz, 1H), 7.88 (d, *J* = 2.5 Hz, 1H), 7.37 (t, *J* = 8.0 Hz, 1H), 7.19 (d, *J* = 8.5 Hz, 1H), 7.13–7.07 (m, 3H), 6.97–6.92 (m, 2H), 6.03 (bs, 1H), 4.13 (s, 3H), 3.90 (s, 3H), 3.86 (s, 3H); <sup>13</sup>C NMR (CDCl<sub>3</sub>, 125 MHz) δ 165.7, 160.0, 159.5, 158.7, 150.4, 143.1, 138.7, 133.7, 131.2, 130.1, 129.4, 128.3, 126.1, 124.8, 123.3, 122.1, 121.7, 115.4, 114.1, 113.3, 113.1, 111.2, 62.1, 56.1, 55.5; IR (film) *v*<sub>max</sub> 3348, 3038, 2970, 2847, 2093, 1643, 1014, 795; HRMS (ESI<sup>+</sup>) *m/z*: [M + H<sup>+</sup>] calcd for C<sub>25</sub>H<sub>22</sub>NO<sub>7</sub>, 448.1396; found, 448.1381.

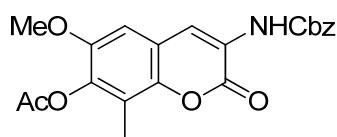

**3-(((benzyloxy)carbonyl)amino)-6-methoxy-8-methyl-2-oxo-2H-chromen-7-yl acetate (8b):** A solution of **7b**<sup>1</sup> (195 mg, 0.55 mmol) in anhydrous pyridine (3.0 mL) was treated with acetic anhydride (1.0 mL). After 12 h, the solvent was removed and the residue purified via column chromatography (SiO<sub>2</sub>, 100:1, CH<sub>2</sub>Cl<sub>2</sub>:acetone) to afford **8b** as a colorless amorphous solid (216 mg, 99%): <sup>1</sup>H NMR ((CD<sub>3</sub>)<sub>2</sub>CO, 400 MHz) δ 8.31 (s, 1H), 8.22 (bs, 1H), 7.48 (d, *J* = 8.0 Hz, 2H), 7.42–7.33 (m, 3H), 7.25 (s, 1H), 5.26 (s, 2H), 3.89 (s, 3H), 2.33 (s, 3H), 2.22 (s, 3H); <sup>13</sup>C NMR (CDCl<sub>3</sub>, 125 MHz) δ 168.6, 158.5, 153.2, 148.8, 142.6, 139.7, 135.6, 128.8 (2C), 128.7, 128.4 (2C), 124.0, 121.3, 120.6, 117.6, 106.2, 67.7, 56.3, 20.5, 9.3; IR (film) *v*<sub>max</sub> 3306, 2924, 2853, 1759, 1703, 1531, 1393, 1205, 1088, 1026, 914, 764, 698; HRMS (ESI<sup>+</sup>) *m/z*: [M + H<sup>+</sup>] calcd for C<sub>21</sub>H<sub>20</sub>NO<sub>7</sub>, 398.1240; found, 398.1258.

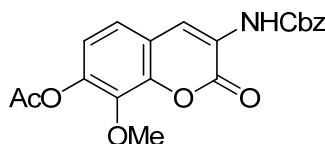

**3-(((benzyloxy)carbonyl)amino)-8-methoxy-2-oxo-2H-chromen-7-yl acetate (8c):** A solution of **7c**<sup>1</sup> (60 mg, 0.18 mmol) in anhydrous pyridine (2.25 mL) was treated with acetic anhydride (0.75 mL). After 12 h, the solvent was removed and the residue purified via column chromatography (SiO<sub>2</sub>, 40:1, CH<sub>2</sub>Cl<sub>2</sub>:acetone) to afford **8c** as a colorless amorphous solid (67 mg, 99%): <sup>1</sup>H NMR (CDCl<sub>3</sub>, 500 MHz) δ 8.29 (s, 1H), 7.59 (s, 1H), 7.42–7.34 (m, 5H), 7.18 (d, *J* = 8.5 Hz, 1H), 7.00 (d, *J* = 8.5 Hz, 1H), 5.23 (s, 2H), 4.01 (s, 3H), 2.36 (s, 3H); <sup>13</sup>C NMR (CDCl<sub>3</sub>, 125 MHz) δ 168.9, 157.6, 153.2, 144.0, 143.5, 139.5, 135.5, 128.8 (2C), 128.7, 128.4 (2C), 123.8, 121.8, 121.2, 119.8, 119.2, 67.8, 61.8, 20.8; IR (film) *v*<sub>max</sub> 3409, 3352, 3312, 3088, 3038, 2945, 2837, 2359, 2332, 1765, 1710, 1533, 1383, 1366, 1238, 1202, 1045, 698; HRMS (ESI<sup>+</sup>) *m/z*: [M + Na<sup>+</sup>] calcd for C<sub>20</sub>H<sub>17</sub>NNaO<sub>7</sub>, 406.0903; found, 406.0928.

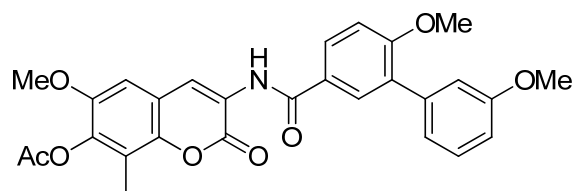

**3-(3',6-dimethoxy-[1,1'-biphenyl]-3-ylcarboxamido)-6-methoxy-8-methyl-2-oxo-2H-chromen-7-yl acetate (12b):** Palladium on carbon (10%, 43 mg) was added to **8b** (216 mg, 0.54 mmol) in anhydrous THF (3.6 mL) and the solution was placed under an atmosphere of H<sub>2</sub>. After 12 h, the solution was filtered through SiO<sub>2</sub> (40:1, CH<sub>2</sub>Cl<sub>2</sub>:acetone) and the eluent was concentrated to afford a yellow solid, which was used without further purification (142 mg, 99%).

A solution of 3',6-dimethoxy-[1,1'-biphenyl]-3-carbonyl chloride<sup>2</sup> (130 mg, 0.47 mmol), in anhydrous THF (2.7 mL), was added to a solution of the amine (123 mg, 0.47 mmol) and



anhydrous triethylamine (0.13 mL, 0.94 mmol) in anhydrous THF (2.7 mL). After 12 h, the solvent was removed and the residue purified via column chromatography (SiO<sub>2</sub>, 40:1, CH<sub>2</sub>Cl<sub>2</sub>:acetone) to afford **12b** as a colorless amorphous solid (129 mg, 55%): <sup>1</sup>H NMR (CD<sub>2</sub>Cl<sub>2</sub>, 400 MHz) δ 8.84 (s, 1H), 8.80 (s, 1H), 7.97 (dd, *J* = 8.5, 2.5 Hz, 1H), 7.92 (d, *J* = 2.5 Hz, 1H), 7.39 (t, *J* = 8.0 Hz, 1H), 7.16–7.11 (m, 3H), 7.01 (s, 1H), 6.97–6.95 (m, 1H), 3.94 (s, 3H), 3.90 (s, 3H), 3.88 (s, 3H), 2.38 (s, 3H), 2.32 (s, 3H); <sup>13</sup>C NMR (CDCl<sub>3</sub>, 125 MHz) δ 168.6, 165.8, 160.0, 159.5, 159.2, 148.9, 142.8, 140.0, 138.7, 131.2, 130.2, 129.3, 128.4, 126.0, 124.2, 123.3, 122.2, 120.6, 117.8, 115.4, 113.3, 111.2, 106.6, 56.4, 56.1, 55.5, 20.6, 9.3; IR (film)  $\nu_{max}$  3404, 2926, 2853, 1765, 1713, 1670, 1603, 1522, 1385, 1242, 1204, 1180, 1094, 1022, 571; HRMS (ESI<sup>+</sup>) *m/z*: [M + H<sup>+</sup>] calcd for C<sub>28</sub>H<sub>26</sub>NO<sub>8</sub>, 504.1658; found, 504.1625.

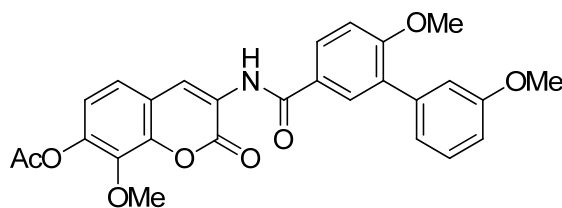

**3-(3',6-dimethoxy-[1,1'-biphenyl]-3-ylcarboxamido)-8-methoxy-2-oxo-2H-chromen-7-yl acetate (12c):** Palladium on carbon (10%, 5 mg) was added to **8c** (25 mg, 0.065 mmol) in anhydrous THF (0.44 mL) and the solution was placed under an atmosphere of H<sub>2</sub>. After 12 h, the solution was filtered through SiO<sub>2</sub> (40:1, CH<sub>2</sub>Cl<sub>2</sub>:acetone) and the eluent was concentrated to afford a yellow solid, which was used without further purification (16 mg, 99%).

A solution of 3',6-dimethoxy-[1,1'-biphenyl]-3-carbonyl chloride<sup>2</sup> (18 mg, 0.064 mmol), in anhydrous THF (0.37 mL), was added to a solution of the amine (16 mg, 0.064 mmol) and anhydrous triethylamine (18 μL, 0.13 mmol), dissolved in anhydrous THF (0.37 mL). After 12 h, the solvent was removed and the residue purified via column chromatography (SiO<sub>2</sub>, 40:1, CH<sub>2</sub>Cl<sub>2</sub>:acetone) to afford **12c** as a colorless amorphous solid (16 mg, 50%): <sup>1</sup>H NMR (CDCl<sub>3</sub>,

500 MHz)  $\delta$  8.83 (s, 1H), 8.75 (s, 1H), 7.92 (dd,  $J = 8.5, 2.5$  Hz, 1H), 7.89 (d,  $J = 2.5$  Hz, 1H), 7.36 (t,  $J = 8.0$  Hz, 1H), 7.26 (d,  $J = 8.0$  Hz, 1H), 7.13–7.02 (m, 4H), 6.94–6.92 (m, 1H), 4.04 (s, 3H), 3.90 (s, 3H), 3.86 (s, 3H), 2.37 (s, 3H);  $^{13}\text{C}$  NMR ( $\text{CDCl}_3$ , 125 MHz)  $\delta$  169.0, 165.8, 160.1, 159.5, 158.3, 144.3, 143.7, 139.6, 138.6, 131.3, 130.2, 129.4, 128.4, 125.9, 124.0, 123.2, 122.3, 122.1, 120.0, 119.4, 115.4, 113.3, 111.2, 61.8, 56.0, 55.5, 20.9; IR (film)  $\nu_{\text{max}}$  3398, 3097, 2993, 2926, 2853, 2357, 2339, 1765, 1666, 1599, 1520, 1456, 1362, 1244, 1202, 1078, 1022, 905, 802, 734; HRMS (ESI<sup>+</sup>)  $m/z$ :  $[\text{M} + 2\text{H}^+]$  calcd for  $\text{C}_{27}\text{H}_{25}\text{NO}_8$ , 491.1580; found, 491.1537.

### Representative procedure for Mitsunobu coupling with sugars:

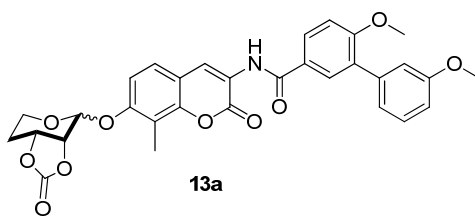

### 3',6-dimethoxy-N-(8-methyl-2-oxo-7-((3aR,7aR)-2-oxotetrahydro-3aH-[1,3]dioxolo[4,5-c]pyran-4-yloxy)-2H-chromen-3-yl)biphenyl-3-carboxamide (13a):

Diisopropylazodicarboxylate (90  $\mu\text{L}$ , 0.46 mmol) was added slowly to a solution of phenol **6** (100 mg, 0.23 mmol), sugar **F** (48 mg, 0.28 mmol) and triphenylphosphine (122 mg, 0.46 mmol) in THF (3 mL) at rt. The resulting reaction mixture was stirred at rt for 2 h, quenched with water and extracted with EtOAc (2 x 10 mL). The combined organic extracts were washed with saturated sodium chloride solution, dried over anhydrous  $\text{Na}_2\text{SO}_4$ , filtered, and concentrated. The crude product was purified via column chromatography ( $\text{SiO}_2$ , 100:1,  $\text{CHCl}_3$ :MeOH) to afford compound **13a** (117 mg, 88%) as a mixture of diastereomers.

### Representative procedure for cyclic carbonate hydrolysis:

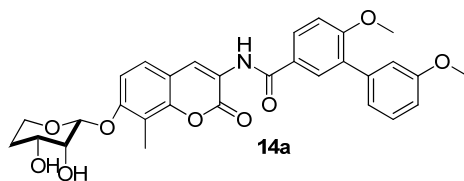

**N-(7-((2R,3R,4R)-3,4-dihydroxytetrahydro-2H-pyran-2-yloxy)-8-methyl-2-oxo-2H-chromen-3-yl)-3',6-dimethoxybiphenyl-3-carboxamide (14a):** A solution of **13a** (117 mg, 0.20 mmol) in THF:H<sub>2</sub>O:MeOH (3:1:1, 2 mL) was treated with LiOH (26 mg, 0.61 mmol). The resulting reaction mixture was stirred at rt for 2 h, cooled to 0°C, then acidified to pH ~4 with 5% aqueous HCl. The organic layer was separated and the aqueous layer was extracted with dichloromethane (3 x 20 mL). The combined organic layers were washed with saturated sodium chloride solution, dried over anhydrous Na<sub>2</sub>SO<sub>4</sub> and concentrated under reduced pressure. The crude residue was purified via column chromatography (SiO<sub>2</sub>, 100:5, CH<sub>2</sub>Cl<sub>2</sub>:MeOH) to yield diastereomers **14a** and **15a**. Compound **14a** (59 mg, 53%) was obtained as a colorless amorphous solid. <sup>1</sup>H NMR (500 MHz, CDCl<sub>3</sub>) δ 8.81 (s, 1H), 8.72 (bs, 1H), 7.92 (dd, *J* = 2.3, 8.6 Hz, 1H), 7.89 (d, *J* = 2.4 Hz, 1H), 7.37 (t, *J* = 7.2 Hz, 1H), 7.36 (d, *J* = 8.0 Hz, 1H), 7.15 (d, *J* = 8.6 Hz, 1H), 7.13 (d, *J* = 7.6 Hz, 1H), 7.09 (t, *J* = 2.4 Hz, 1H), 7.07 (d, *J* = 8.9 Hz, 1H), 6.94 (dd, *J* = 1.9, 7.6 Hz, 1H), 5.48 (d, *J* = 3.1 Hz, 1H), 4.14 (m, 1H), 4.03 (dt, *J* = 3.3, 11.7 Hz, 1H), 3.90 (s, 3H), 3.86 (s, 3H), 3.62 (dt, *J* = 3.7, 12.0 Hz, 1H), 2.77 (d, *J* = 9.3 Hz, 1H), 2.68 (d, *J* = 9.4 Hz, 1H), 2.40 (s, 3H), 2.02 (m, 2H); <sup>13</sup>C NMR (125 MHz, CDCl<sub>3</sub>) δ 165.5, 160.0, 159.4, 156.1, 149.0, 138.5, 131.1, 130.0, 129.2, 128.2, 126.0, 125.9, 123.8, 122.4, 122.0, 115.2, 113.2, 112.3, 111.0, 99.4, 77.2, 68.4, 67.8, 55.9, 55.6, 55.3, 31.0, 8.7; IR (film)  $\nu_{max}$  3303, 3288, 2921, 2851, 1705, 1672, 1604, 1526, 1504, 1485, 1367, 1240, 1132, 1074, 1051, 1024, 999 cm<sup>-1</sup>; HRMS (FAB) *m/z*: [M + Na<sup>+</sup>] calcd for C<sub>30</sub>H<sub>29</sub>NNaO<sub>9</sub>, 570.1740; found, 570.1744.

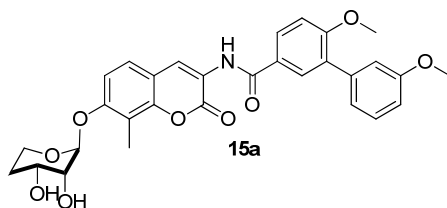

**N-(7-((2S,3R,4R)-3,4-dihydroxytetrahydro-2H-pyran-2-yloxy)-8-methyl-2-oxo-2H-chromen-3-yl)-3',6-dimethoxybiphenyl-3-carboxamide (15a):** Compound **15a** (40 mg, 35%) was obtained as a colorless amorphous solid.  $^1\text{H}$  NMR (500 MHz,  $\text{CDCl}_3$ )  $\delta$  8.77 (s, 1H), 8.70 (s, 1H), 7.91 (dd,  $J = 2.4, 8.5$  Hz, 1H), 7.89 (d,  $J = 2.3$  Hz, 1H), 7.36 (t,  $J = 8.0$  Hz, 1H), 7.31 (d,  $J = 8.6$  Hz, 1H), 7.12 (dt,  $J = 1.5, 7.6$  Hz, 1H), 7.09 (m, 2H), 7.06 (d,  $J = 8.6$  Hz, 1H), 6.93 (ddd,  $J = 0.6, 2.5, 8.3$  Hz, 1H), 5.52 (d,  $J = 4.0$  Hz, 1H), 4.26 (m, 1H), 3.95 (t,  $J = 3.7$  Hz, 1H), 3.89 (s, 3H), 3.85 (s, 3H), 3.84 (m, 1H), 3.79 (m, 1H), 2.79 (bs, 1H), 2.53 (bs, 1H), 2.33 (s, 3H), 1.97 (m, 2H);  $^{13}\text{C}$  NMR (125 MHz,  $\text{CDCl}_3$ )  $\delta$  165.7, 159.9, 159.5, 159.4, 155.8, 149.1, 138.7, 131.1, 130.1, 129.3, 128.3, 126.0, 125.9, 124.2, 122.2, 122.1, 115.4, 115.0, 114.7, 113.2, 112.4, 111.8, 111.1, 98.8, 77.4, 70.0, 66.3, 60.0, 56.0, 55.4, 29.8, 8.5; IR (film)  $\nu_{\text{max}}$  3400, 3387, 2954, 2924, 2851, 1713, 1668, 1605, 1526, 1504, 1481, 1367, 1265, 1242, 1205, 1078, 1051, 1033, 1002, 999  $\text{cm}^{-1}$ ; HRMS (FAB)  $m/z$ :  $[\text{M} + \text{Na}^+]$  calcd for  $\text{C}_{30}\text{H}_{29}\text{NNaO}_9$ , calcd 570.1740; found, 570.1733.

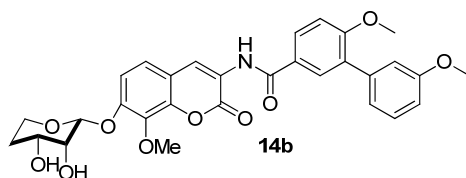

**N-(7-((2R,3R,4R)-3,4-dihydroxytetrahydro-2H-pyran-2-yloxy)-8-methoxy-2-oxo-2H-chromen-3-yl)-3',6-dimethoxybiphenyl-3-carboxamide (14b):** Compound **14b** (36 mg, 38%) was obtained as a colorless amorphous solid.  $^1\text{H}$  NMR (500 MHz,  $\text{CDCl}_3$ )  $\delta$  8.81 (s, 1H), 8.72 (s, 1H), 7.91 (dd,  $J = 2.4, 8.6$  Hz, 1H), 7.88 (d,  $J = 2.4$  Hz, 1H), 7.37 (t,  $J = 7.6$  Hz, 1H), 7.23 (d,  $J = 8.8$  Hz, 1H), 7.27 (d,  $J = 8.9$  Hz, 1H), 7.12 (dt,  $J = 1.2, 7.9$  Hz, 1H), 7.09 (m, 1H), 7.07 (d,  $J =$

8.6 Hz, 1H), 6.93 (dd,  $J = 1.0, 2.9, 7.9$  Hz, 1H), 5.40 (d,  $J = 4.8$  Hz, 1H), 4.29 (m, 1H), 4.02 (s, 3H), 3.93 (m, 1H), 3.90 (s, 3H), 3.88 (m, 1H), 3.86 (s, 3H), 2.82 (bs, 1H), 2.38 (bs, 1H), 1.95 (m, 1H), 1.88 (m, 1H);  $^{13}\text{C}$  NMR (125 MHz,  $\text{CDCl}_3$ )  $\delta$  165.7, 160.0, 159.4, 158.8, 150.9, 144.0, 138.6, 137.6, 131.1, 130.1, 129.3, 128.3, 125.9, 123.7, 122.8, 122.7, 122.1, 116.4, 115.4, 114.1, 113.3, 111.2, 100.5, 66.4, 62.1, 60.5, 56.0, 55.5, 29.8; IR (film)  $\nu_{\text{max}}$  3411, 3301, 2989, 2985, 1716, 1668, 1605, 1524, 1502, 1483, 1462, 1436, 1365, 1274, 1247, 1182, 1118, 1070, 997  $\text{cm}^{-1}$ ; HRMS (FAB)  $m/z$ :  $[\text{M} + \text{Na}^+]$  calcd for  $\text{C}_{30}\text{H}_{29}\text{NNaO}_{10}$ , calcd 586.1689; found, 586.1683.

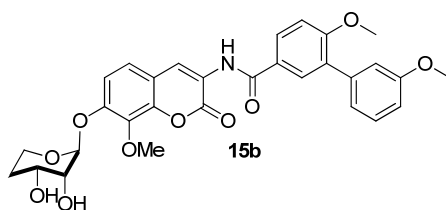

**N-(7-((2S,3R,4R)-3,4-dihydroxytetrahydro-2H-pyran-2-yloxy)-8-methoxy-2-oxo-2H-chromen-3-yl)-3',6-dimethoxybiphenyl-3-carboxamide (15b):** Compound **15b** (21 mg, 22%) was obtained as a colorless amorphous solid.  $^1\text{H}$  NMR (500 MHz,  $\text{CDCl}_3$ )  $\delta$  8.78 (s, 1H), 8.70 (s, 1H), 7.87 (m, 2H), 7.35 (t,  $J = 7.7$  Hz, 1H), 7.21 (d,  $J = 7.7$  Hz, 1H), 7.00–7.15 (m, 4H), 6.92 (d,  $J = 7.9$  Hz, 1H), 5.56 (s, 1H), 4.17 (m, 1H), 4.04 (s, 3H), 4.01 (m, 2H), 3.88 (s, 3H), 3.85 (s, 3H), 3.57 (d,  $J = 10.5$  Hz, 1H), 3.42 (m, 1H), 1.99 (m, 2H);  $^{13}\text{C}$  NMR (125 MHz,  $\text{CDCl}_3$ )  $\delta$  165.7, 160.0, 159.4, 158.5, 150.3, 143.8, 138.6, 137.3, 131.1, 130.1, 129.3, 128.3, 125.8, 123.6, 122.8, 122.1, 116.2, 115.3, 114.0, 113.2, 111.1, 99.6, 68.4, 67.7, 62.2, 56.0, 55.5, 55.4, 31.3; IR (film)  $\nu_{\text{max}}$  3400, 3386, 2935, 2896, 2839, 1707, 1670, 1605, 1521, 1500, 1367, 1274, 1245, 1120, 1081, 1054, 952  $\text{cm}^{-1}$ ; HRMS (FAB)  $m/z$ :  $[\text{M} + \text{Na}^+]$  calcd for  $\text{C}_{30}\text{H}_{29}\text{NNaO}_{10}$ , calcd 586.1689; found, 586.1689.

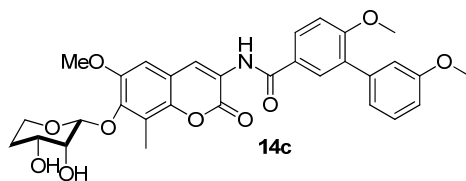

**N-(7-((2R,3R,4R)-3,4-dihydroxytetrahydro-2H-pyran-2-yloxy)-6-methoxy-8-methyl-2-oxo-2H-chromen-3-yl)-3',6-dimethoxybiphenyl-3-carboxamide (14c):** Compound **14c** (37 mg, 44%) was obtained as a colorless amorphous solid.  $^1\text{H}$  NMR (500 MHz,  $\text{CDCl}_3$ )  $\delta$  8.81 (s, 1H), 8.80 (s, 1H), 7.93 (dd,  $J = 2.4, 8.6$  Hz, 1H), 7.90 (d,  $J = 2.4$  Hz, 1H), 7.38 (t,  $J = 8.0$  Hz, 1H), 7.13 (dt,  $J = 1.5, 7.6$  Hz, 1H), 7.10 (t,  $J = 2.5$  Hz, 1H), 7.08 (d,  $J = 8.8$  Hz, 1H), 6.94 (ddd,  $J = 0.9, 2.7, 8.0$  Hz, 1H), 6.89 (s, 1H), 5.03 (d,  $J = 6.9$  Hz, 1H), 4.28 (m, 1H), 3.94 (s, 3H), 3.91 (s, 3H), 3.87 (s, 3H), 3.75–3.90 (m, 3H), 3.60 (bs, 1H), 2.64 (bs, 1H), 2.47 (s, 3H), 1.90 (m, 2H);  $^{13}\text{C}$  NMR (125 MHz,  $\text{CDCl}_3$ )  $\delta$  165.6, 159.9, 159.3, 159.2, 149.1, 146.0, 143.3, 138.5, 131.1, 130.0, 129.2, 128.2, 125.9, 123.6, 123.3, 122.1, 122.0, 116.3, 115.3, 113.1, 111.0, 106.3, 104.1, 71.8, 66.7, 61.1, 56.2, 55.9, 55.4, 30.1, 9.9; IR (film)  $\nu_{\text{max}}$  3401, 3363, 3001, 2952, 1701, 1670, 1605, 1589, 1501, 1423, 1367, 1230, 1191, 1110, 1053, 997  $\text{cm}^{-1}$ ; HRMS (FAB)  $m/z$ :  $[\text{M} + \text{Na}^+]$  calcd for  $\text{C}_{31}\text{H}_{31}\text{NNaO}_{10}$ , calcd 600.1841; found, 600.1846.

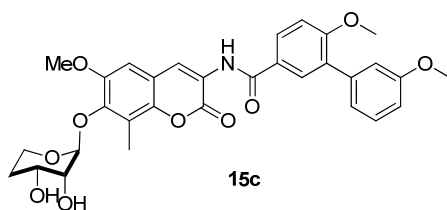

**N-(7-((2S,3R,4R)-3,4-dihydroxytetrahydro-2H-pyran-2-yloxy)-6-methoxy-8-methyl-2-oxo-2H-chromen-3-yl)-3',6-dimethoxybiphenyl-3-carboxamide (15c):** Compound **15c** (24 mg, 29%) was obtained as a colorless amorphous solid.  $^1\text{H}$  NMR (500 MHz,  $\text{CDCl}_3$ )  $\delta$  8.75 (s, 1H), 8.73 (s, 1H), 7.86–7.90 (m, 2H), 7.35 (t,  $J = 7.8$  Hz, 1H), 7.11 (dt,  $J = 1.5, 8.0$  Hz, 1H), 7.08 (t,  $J = 2.4$  Hz, 1H), 7.03 (d,  $J = 9.6$  Hz, 1H), 6.92 (ddd,  $J = 1.2, 8.7$  Hz, 1H), 6.81 (s, 1H), 5.20

(d,  $J = 3.3$  Hz, 1H), 4.35 (td,  $J = 3.1, 11.5$  Hz, 1H), 4.09 (s, 1H), 3.93 (d,  $J = 6.5$  Hz, 1H), 3.90 (s, 3H), 3.87 (s, 3H), 3.85 (s, 3H), 3.55 (dt,  $J = 4.4, 11.5$  Hz, 1H), 3.19 (d,  $J = 5.2$  Hz, 1H), 2.44 (s, 3H), 1.94 (m, 2H);  $^{13}\text{C}$  NMR (125 MHz,  $\text{CDCl}_3$ )  $\delta$  165.6, 159.9, 159.4, 159.1, 149.2, 146.1, 143.3, 138.6, 132.2, 132.1, 130.1, 129.2, 128.6, 128.3, 125.9, 123.6, 123.1, 116.2, 115.4, 113.1, 111.0, 106.3, 103.6, 69.2, 67.3, 56.8, 56.2, 55.9, 55.4, 30.6, 9.9; IR (film)  $\nu_{\text{max}}$  3400, 3377, 2952, 2867, 1711, 1670, 1605, 1587, 1500, 1427, 1369, 1227, 1138, 1120, 1054, 997  $\text{cm}^{-1}$ ; HRMS (FAB)  $m/z$ :  $[\text{M} + \text{Na}^+]$  calcd for  $\text{C}_{31}\text{H}_{31}\text{NNaO}_{10}$ , calcd 600.1844; found, 600.1846.

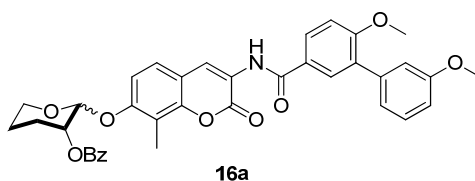

**(R)-2-(3-(3',6-dimethoxybiphenyl-3-ylcarboxamido)-8-methyl-2-oxo-2H-chromen-7-yloxy)tetrahydro-2H-pyran-3-yl benzoate (16a):** Compound **16a** was obtained as a colorless amorphous solid and carried on without further purification.

Sodium metal (20 mg, 0.86 mmol) was added to a solution of **16a** (110 mg, 0.17 mmol) in MeOH (5 mL) at  $0^\circ\text{C}$ . The resulting reaction mixture was stirred for 5 min at  $0^\circ\text{C}$ , then quenched with water and extracted with EtOAc (3 x 10 mL). The combined organic layers were washed with saturated sodium chloride solution, dried over anhydrous  $\text{Na}_2\text{SO}_4$  and concentrated. The residue was purified via column chromatography ( $\text{SiO}_2$ , 100:1,  $\text{CH}_2\text{Cl}_2$ :MeOH) to afford **17a** and **18a** (62 mg, 64%) as a mixture diastereomers.

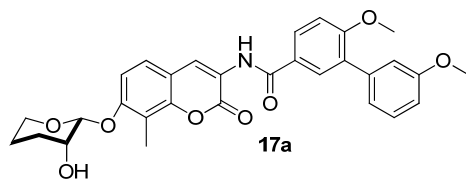

**N-(7-((2R,3R)-3-hydroxytetrahydro-2H-pyran-2-yloxy)-8-methyl-2-oxo-2H-chromen-3-yl)-3',6-dimethoxybiphenyl-3-carboxamide (17a):** Compound **17a** (35 mg, 36%) was obtained

as an amorphous solid.  $^1\text{H}$  NMR (500 MHz,  $\text{CDCl}_3$ )  $\delta$  8.81 (s, 1H), 8.72 (bs, 1H), 7.92 (dd,  $J = 2.4, 8.6$  Hz, 1H), 7.89 (d,  $J = 2.4$  Hz, 1H), 7.37 (t,  $J = 8.1$  Hz, 1H), 7.36 (d,  $J = 8.8$  Hz, 1H), 7.17 (d,  $J = 8.8$  Hz, 1H), 7.13 (dt,  $J = 1.2, 7.8$  Hz, 1H), 7.09 (m, 1H), 7.07 (d,  $J = 8.4$  Hz, 1H), 6.94 (ddd,  $J = 0.9, 2.6, 8.3$  Hz, 1H), 5.55 (d,  $J = 3.2$  Hz, 1H), 3.90 (s, 3H), 3.86 (s, 3H), 3.70 (m, 1H), 3.61 (m, 1H), 2.41 (s, 3H), 2.06 (m, 1H), 1.91 (m, 2H), 1.80 (m, 2H);  $^{13}\text{C}$  NMR (125 MHz,  $\text{CDCl}_3$ )  $\delta$  165.7, 159.9, 159.5, 159.4, 156.0, 149.2, 138.7, 131.2, 130.1, 129.3, 128.3, 126.2, 126.0, 124.2, 122.3, 122.1, 115.4, 115.1, 114.7, 113.3, 112.2, 111.1, 97.6, 68.4, 60.5, 56.0, 55.5, 27.9, 24.2, 8.6; IR (film)  $\nu_{\text{max}}$  3402, 2935, 2879, 2851, 1705, 1670, 1605, 1527, 1500, 1367, 1242, 1207, 1180, 1126, 1068, 987, 970  $\text{cm}^{-1}$ ; HRMS (FAB)  $m/z$ :  $[\text{M} + \text{Na}^+]$  calcd for  $\text{C}_{30}\text{H}_{29}\text{NNaO}_8$ , calcd 554.1791; found, 554.1788.

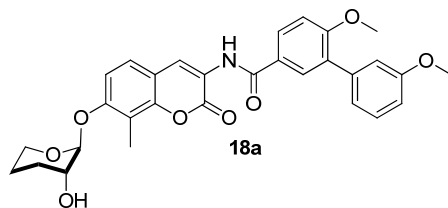

**N-(7-(((2S,3R)-3-hydroxytetrahydro-2H-pyran-2-yloxy)-8-methyl-2-oxo-2H-chromen-3-yl)-3',6-dimethoxybiphenyl-3-carboxamide (18a):** Compound **18a** (27 mg, 28%) was obtained as a colorless amorphous solid.  $^1\text{H}$  NMR (500 MHz,  $\text{CDCl}_3$ )  $\delta$  8.81 (s, 1H), 8.71 (bs, 1H), 7.92 (dd,  $J = 2.4, 8.6$  Hz, 1H), 7.89 (d,  $J = 2.3$  Hz, 1H), 7.37 (t,  $J = 7.9$  Hz, 1H), 7.34 (d,  $J = 8.0$  Hz, 1H), 7.08–7.14 (m, 3H), 7.07 (d,  $J = 8.8$  Hz, 1H), 6.93 (ddd,  $J = 0.7, 2.6, 8.3$  Hz, 1H), 5.16 (d,  $J = 4.6$  Hz, 1H), 3.92 (m, 1H), 3.90 (s, 3H), 3.86 (s, 3H), 3.62 (m, 1H), 2.38 (s, 3H), 2.23 (m, 2H), 1.90 (m, 1H), 1.74 (m, 1H), 1.63 (m, 1H);  $^{13}\text{C}$  NMR (125 MHz,  $\text{CDCl}_3$ )  $\delta$  165.7, 159.9, 159.5, 159.4, 156.1, 149.2, 138.7, 131.2, 130.1, 129.3, 128.3, 126.2, 124.2, 122.3, 122.1, 115.4, 115.2, 114.7, 113.3, 112.1, 111.1, 100.4, 67.8, 63.4, 56.0, 55.5, 27.5, 22.1, 21.9, 8.6; IR (film)  $\nu_{\text{max}}$



3404, 2923, 2845, 1711, 1670, 1606, 1526, 1502, 1369, 1242, 1205, 1178, 1115, 1057, 995, 974  $\text{cm}^{-1}$ ; HRMS (FAB)  $m/z$ :  $[M + \text{Na}^+]$  calcd for  $\text{C}_{30}\text{H}_{29}\text{NNaO}_8$ , calcd 554.1791; found, 554.1803.

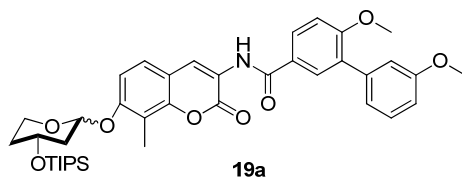

**(R)-3',6-dimethoxy-N-(8-methyl-2-oxo-7-(4-(triisopropylsilyloxy)tetrahydro-2H-pyran-2-yl)-2H-chromen-3-yl)biphenyl-3-carboxamide (19a)**: Compound **19a** (158 mg, 78%) was obtained as a colorless amorphous solid and used without further purification.

Tetrabutylammonium fluoride (0.5 mL, 0.50 mmol) was added dropwise to a solution of **19a** (158 mg, 0.23 mmol) in THF (4 mL) at rt. The resulting reaction mixture was stirred at rt for 1 h, then quenched with water and extracted with EtOAc (3 x 10 mL). The combined organic layers were washed with saturated sodium chloride solution, dried over anhydrous  $\text{Na}_2\text{SO}_4$  and concentrated. The residue was purified via column chromatography ( $\text{SiO}_2$ , 100:1,  $\text{CH}_2\text{Cl}_2$ :MeOH) to afford **20a** and **21a** (120 mg, 72%) as a mixture of diastereomers.

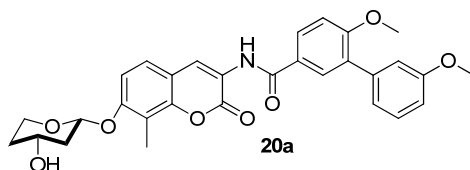

**N-(7-((2R,4R)-4-hydroxytetrahydro-2H-pyran-2-yl)-8-methyl-2-oxo-2H-chromen-3-yl)-3',6-dimethoxybiphenyl-3-carboxamide (20a)**: Compound **20a** (68 mg, 41%) was obtained as a colorless amorphous solid.  $^1\text{H}$  NMR (500 MHz,  $\text{CDCl}_3$ )  $\delta$  8.81 (s, 1H), 8.71 (s, 1H), 7.92 (dd,  $J = 2.4, 8.6$  Hz, 1H), 7.89 (d,  $J = 2.4$  Hz, 1H), 7.37 (t,  $J = 7.9$  Hz, 1H), 7.34 (d,  $J = 8.7$  Hz, 1H), 7.13 (d,  $J = 8.7$  Hz, 1H), 7.12 (m, 1H), 7.09 (m, 1H), 7.07 (d,  $J = 8.6$  Hz, 1H), 6.93 (ddd,  $J = 0.8, 2.6, 8.27$  Hz, 1H), 5.77 (t,  $J = 2.8$  Hz, 1H), 4.37 (m, 1H), 3.90 (s, 3H), 3.86 (s, 3H), 3.81 (d,  $J = 2.5$  Hz, 1H), 3.80 (t,  $J = 2.1$  Hz, 1H), 2.35 (s, 3H), 2.33 (m, 1H), 2.01 (m, 1H), 1.80 (m,

1H), 1.70 (m, 1H), 1.64 (bs, 1H):  $^{13}\text{C}$  NMR (125 MHz,  $\text{CDCl}_3$ )  $\delta$  165.7, 159.9, 159.6, 159.5, 156.1, 149.2, 138.7, 131.2, 130.1, 129.3, 128.3, 126.2, 125.8, 124.4, 122.1, 122.0, 115.4, 114.8, 114.3, 113.3, 111.7, 111.1, 96.8, 63.9, 59.8, 56.0, 55.5, 39.5, 34.9, 8.5; IR (film)  $\nu_{\text{max}}$  3477, 2967, 2923, 1713, 1668, 1606, 1525, 1502, 1369, 1242, 1205, 1178, 1114, 1057, 974  $\text{cm}^{-1}$ ; HRMS (FAB)  $m/z$ :  $[\text{M} + \text{Na}^+]$  calcd for  $\text{C}_{30}\text{H}_{29}\text{NNaO}_8$ , calcd 554.1791; found, 554.1794.

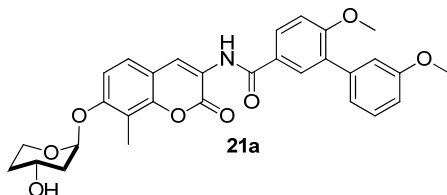

**N-(7-((2S,4R)-4-hydroxytetrahydro-2H-pyran-2-yloxy)-8-methyl-2-oxo-2H-chromen-3-yl)-3',6-dimethoxybiphenyl-3-carboxamide (21a):** Compound **21a** (52 mg, 31%) was obtained as a colorless amorphous solid.  $^1\text{H}$  NMR (500 MHz,  $\text{CDCl}_3$ )  $\delta$  8.81 (s, 1H), 8.71 (s, 1H), 7.92 (dd,  $J = 2.4, 8.6$  Hz, 1H), 7.89 (d,  $J = 2.4$  Hz, 1H), 7.36 (t,  $J = 7.9$  Hz, 1H), 7.35 (d,  $J = 8.6$  Hz, 1H), 7.14 (d,  $J = 8.7$  Hz, 1H), 7.12 (m, 1H), 7.09 (m, 1H), 7.07 (d,  $J = 8.5$  Hz, 1H), 6.93 (ddd,  $J = 0.8, 2.5, 8.5$  Hz, 1H), 5.55 (t,  $J = 3.4$  Hz, 1H), 4.15 (m, 2H), 3.90 (s, 3H), 3.86 (s, 3H), 3.64 (dt,  $J = 4.4, 12.1$  Hz, 1H), 2.86 (d,  $J = 6.4$  Hz, 1H), 2.37 (s, 3H), 2.23 (dt,  $J = 3.6, 14.1$  Hz, 1H), 2.10 (m, 1H), 1.99 (m, 1H), 1.77 (m, 1H);  $^{13}\text{C}$  NMR (125 MHz,  $\text{CDCl}_3$ )  $\delta$  165.7, 159.9, 159.5, 159.4, 156.2, 149.1, 138.7, 131.2, 130.1, 129.3, 128.3, 126.1, 125.9, 124.1, 122.3, 122.1, 115.4, 114.9, 114.7, 113.3, 112.0, 111.1, 97.6, 64.1, 57.3, 56.0, 55.5, 37.2, 32.7, 8.7; IR (film)  $\nu_{\text{max}}$  3443, 2964, 2923, 1712, 1667, 1606, 1525, 1502, 1370, 1247, 1205, 1178, 1114, 1057, 974  $\text{cm}^{-1}$ ; HRMS (FAB)  $m/z$ :  $[\text{M} + \text{Na}^+]$  calcd for  $\text{C}_{30}\text{H}_{29}\text{NNaO}_8$ , calcd 554.1791; found, 554.1800.

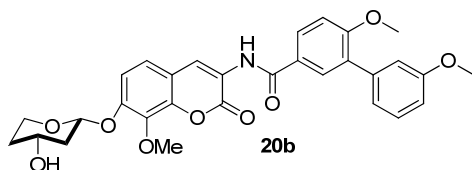

**N-(7-((2R,4R)-4-hydroxytetrahydro-2H-pyran-2-yloxy)-8-methoxy-2-oxo-2H-chromen-3-yl)-3',6-dimethoxybiphenyl-3-carboxamide (20b):** Compound **20b** (36 mg, 66%) was obtained as a colorless amorphous solid.  $^1\text{H}$  NMR (500 MHz,  $\text{CDCl}_3$ )  $\delta$  8.68 (s, 1H), 8.59 (s, 1H), 7.78 (dd,  $J = 2.4, 8.6$  Hz, 1H), 7.75 (d,  $J = 2.4$  Hz, 1H), 7.23 (t,  $J = 7.9$  Hz, 1H), 7.10 (d,  $J = 8.8$  Hz, 1H), 6.97 (m, 3H), 6.80 (dd,  $J = 2.2, 7.9$  Hz, 1H), 5.58 (t,  $J = 3.0$  Hz, 1H), 4.04 (bs, 1H), 3.98 (dt,  $J = 3.0, 11.9$  Hz, 2H), 3.91 (s, 3H), 3.77 (s, 3H), 3.73 (s, 3H), 3.47 (dd,  $J = 3.1, 11.9$  Hz, 1H), 2.04 (m, 1H), 1.86 (s, 1H), 1.67 (m, 2H).  $^{13}\text{C}$  NMR (125 MHz,  $\text{CDCl}_3$ )  $\delta$  165.7, 160.0, 159.5, 158.8, 150.1, 144.1, 138.7, 137.3, 131.2, 130.1, 129.3, 128.3, 126.0, 123.8, 122.8, 122.7, 122.1, 116.0, 115.4, 114.0, 138.8, 113.3, 111.2, 97.5, 63.5, 62.0, 56.6, 56.0, 55.5, 36.2, 32.4; IR (film)  $\nu_{\text{max}}$  3403, 2937, 2848, 1708, 1670, 1606, 1527, 1502, 1367, 1242, 1205, 1113, 1109, 1057, 996, 974  $\text{cm}^{-1}$ ; HRMS (FAB)  $m/z$ :  $[\text{M} + \text{Na}^+]$  calcd for  $\text{C}_{30}\text{H}_{29}\text{NNaO}_9$ , calcd 570.1740; found, 570.1733.

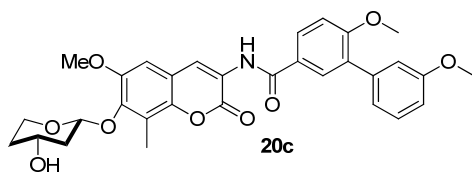

**N-(7-((2R,4R)-4-hydroxytetrahydro-2H-pyran-2-yloxy)-6-methoxy-8-methyl-2-oxo-2H-chromen-3-yl)-3',6-dimethoxybiphenyl-3-carboxamide (20c):** Compound **20c** (36 mg, 38%) was obtained as a colorless amorphous solid.  $^1\text{H}$  NMR (500 MHz,  $\text{CDCl}_3$ )  $\delta$  8.79 (s, 1H), 8.76 (s, 1H), 7.92 (dd,  $J = 2.5, 8.6$  Hz, 1H), 7.89 (d,  $J = 2.4$  Hz, 1H), 7.37 (t,  $J = 8.2$  Hz, 1H), 7.12 (dt,  $J = 1.5, 7.61$  Hz, 1H), 7.09 (t,  $J = 2.5$  Hz, 1H), 7.07 (d,  $J = 8.5$  Hz, 1H), 6.93 (ddd,  $J = 1.5, 2.5, 8.5$  Hz, 1H), 6.86 (s, 1H), 5.33 (t,  $J = 3.5$  Hz, 1H), 4.40 (m, 1H), 4.11 (m, 1H), 3.90 (s, 3H), 3.90 (s, 3H), 3.86 (s, 3H), 3.56 (dt,  $J = 4.8, 11.9$  Hz, 1H), 2.99 (bs, 1H), 2.45 (s, 3H), 2.12–2.25 (m, 2H), 1.93 (m, 1H), 1.75 (m, 1H);  $^{13}\text{C}$  NMR (125 MHz,  $\text{CDCl}_3$ )  $\delta$  165.7, 160.0, 159.5, 159.4, 150.1, 146.2, 143.4, 138.7, 131.2, 130.2, 129.4, 128.4, 126.1, 123.7, 123.5, 122.2, 121.0, 116.1, 115.4,

113.3, 111.2, 106.6, 101.9, 64.4, 58.3, 56.3, 56.1, 55.6, 37.5, 33.0, 10.1; IR (film)  $\nu_{max}$  3398, 2999, 2935, 2833, 1701, 1670, 1602, 1527, 1500, 1483, 1400, 1358, 1275, 1242, 1207, 1180, 1078, 1053, 1022, 916  $\text{cm}^{-1}$ ; HRMS (FAB)  $m/z$ :  $[\text{M} + \text{Na}^+]$  calcd for  $\text{C}_{31}\text{H}_{31}\text{NNaO}_9$ , calcd 584.1897; found, 584.1899.

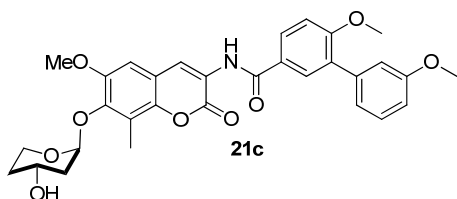

**N-(7-((2S,4R)-4-hydroxytetrahydro-2H-pyran-2-yloxy)-6-methoxy-8-methyl-2-oxo-2H-chromen-3-yl)-3',6-dimethoxybiphenyl-3-carboxamide (21c):** Compound **21c** (29 mg, 29%) was obtained as a colorless amorphous solid.  $^1\text{H}$  NMR (500 MHz,  $\text{CDCl}_3$ )  $\delta$  8.79 (s, 1H), 8.75 (s, 1H), 7.92 (dd,  $J = 2.4, 8.5$  Hz, 1H), 7.89 (d,  $J = 2.4$  Hz, 1H), 7.37 (t,  $J = 7.7$  Hz, 1H), 7.12 (dt,  $J = 1.5, 7.8$  Hz, 1H), 7.09 (t,  $J = 2.7$  Hz, 1H), 7.07 (d,  $J = 8.6$  Hz, 1H), 6.93 (ddd,  $J = 1.2, 2.6, 8.6$  Hz, 1H), 6.85 (s, 1H), 5.64 (t,  $J = 2.9$  Hz, 1H), 4.35 (m, 1H), 4.13 (dt,  $J = 2.7, 11.1$  Hz, 1H), 3.90 (s, 3H), 3.89 (s, 3H), 3.86 (s, 3H), 3.82 (dt,  $J = 3.6, 11.1$  Hz, 1H), 2.46 (m, 1H), 2.42 (s, 3H), 2.02 (m, 1H), 1.77 (td,  $J = 3.5, 10.3$  Hz, 1H), 1.67 (m, 1H), 1.59 (d,  $J = 4.5$  Hz, 1H);  $^{13}\text{C}$  NMR (125 MHz,  $\text{CDCl}_3$ )  $\delta$  165.7, 160.0, 159.5, 159.5, 150.1, 146.5, 143.5, 138.7, 131.2, 130.1, 129.3, 128.3, 126.1, 123.8, 123.2, 122.1, 120.5, 115.7, 115.4, 113.3, 111.1, 106.7, 101.4, 63.9, 60.7, 56.2, 56.0, 55.5, 39.7, 34.9, 9.8; IR (film)  $\nu_{max}$  3401, 2992, 2847, 1709, 1670, 1605, 1527, 1501, 1367, 1242, 1205, 1182, 1113, 1057, 997, 974  $\text{cm}^{-1}$ ; HRMS (FAB)  $m/z$ :  $[\text{M} + \text{Na}^+]$  calcd for  $\text{C}_{31}\text{H}_{31}\text{NNaO}_9$ , calcd 584.1897; found, 584.1903.

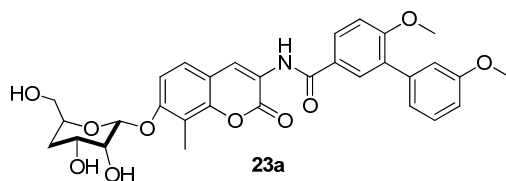

**N-(7-((2R,3R,4R,6S)-3,4-dihydroxy-6-(hydroxymethyl)tetrahydro-2H-pyran-2-yloxy)-8-methyl-2-oxo-2H-chromen-3-yl)-3',6-dimethoxybiphenyl-3-carboxamide (23a):** Compound **22** (237 mg, 82%) was obtained as a colorless amorphous solid and used without further purification.

Pyridinium *p*-toluenesulfonate (16 mg, 0.16 mmol) was added to a solution of **22** (230 mg, 0.33 mmol) in methanol (4 mL) at rt. The reaction mixture was stirred at rt for 48 h, quenched with saturated sodium bicarbonate, then solvent was removed. The residue was diluted with water and extracted with ethyl acetate (3 x 5 mL), and then the combined organic layers were washed with saturated sodium chloride solution, dried over anhydrous Na<sub>2</sub>SO<sub>4</sub> and concentrated. The crude residue) was carried on to deprotection without further purification.

Palladium on carbon (10%, 30 mg) was added to the crude intermediate in ethanol (5 mL) and the solution was placed under an atmosphere of H<sub>2</sub>. After 48 h, the solution was purified via column chromatography (SiO<sub>2</sub>, 100:8, CH<sub>2</sub>Cl<sub>2</sub>:MeOH) to yield triol **23a** as a colorless amorphous solid (112 mg, 60%). <sup>1</sup>H NMR (500 MHz, CDCl<sub>3</sub>) δ 8.72 (s, 1H), 8.67 (s, 1H), 7.91 (d, *J* = 2.4 Hz, 1H), 7.89 (m, 1H), 7.35 (t, *J* = 7.6 Hz, 1H), 7.24 (d, *J* = 8.2 Hz, 1H), 7.07–7.14 (m, 3H), 7.04 (d, *J* = 8.8 Hz, 1H), 6.92 (ddd, *J* = 0.9, 2.7, 8.2 Hz, 1H), 5.57 (d, *J* = 3.6 Hz, 1H), 4.16 (m, 2H), 3.88 (s, 3H), 3.85 (s, 3H), 3.84 (m, 1H), 3.75 (m, 1H), 3.67 (d, *J* = 10.9 Hz, 1H), 3.55 (m, 1H), 3.26 (d, *J* = 8.7 Hz, 1H), 2.99 (d, *J* = 7.5 Hz, 1H), 2.32 (s, 3H), 1.90 (m, 2H); <sup>13</sup>C NMR (125 MHz, CDCl<sub>3</sub>) δ 165.7, 160.0, 159.4, 159.3, 156.2, 149.0, 138.7, 131.1, 130.1, 129.3, 128.4, 126.0, 124.0, 122.4, 122.1, 115.5, 115.4, 115.1, 113.2, 112.4, 111.1, 99.3, 73.0, 68.0, 67.6, 65.0, 64.9, 56.0, 55.4, 33.7, 8.7; IR (film) *v*<sub>max</sub> 3398, 3352, 2923, 2871, 2852, 1708, 1629, 1605, 1577, 1527, 1500, 1483, 1431, 1369, 1245, 1207, 1124, 1076, 985 cm<sup>-1</sup>; HRMS (FAB) *m/z*: [M + Na<sup>+</sup>] calcd for C<sub>31</sub>H<sub>31</sub>NNaO<sub>10</sub>, calcd 600.1846; found, 600.1840.

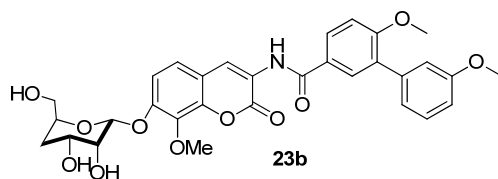

**N-(7-((2R,3R,4R,6S)-3,4-dihydroxy-6-(hydroxymethyl)tetrahydro-2H-pyran-2-yloxy)-8-methoxy-2-oxo-2H-chromen-3-yl)-3',6-dimethoxybiphenyl-3-carboxamide (23b):** Compound **23b** (26 mg, 57%) was obtained as a colorless amorphous solid.  $^1\text{H}$  NMR (500 MHz,  $\text{CDCl}_3$ )  $\delta$  8.72 (s, 1H), 8.65 (s, 1H), 7.83 (dd,  $J = 2.4, 8.6$  Hz, 1H), 7.81 (d,  $J = 2.4$  Hz, 1H), 7.30 (t,  $J = 8.2$  Hz, 1H), 7.16 (d,  $J = 8.9$  Hz, 1H), 6.94–7.07 (d,  $J = 2.4, 8.9$  Hz, 1H), 7.05 (dt,  $J = 1.7, 8.2$  Hz, 1H), 7.02 (t,  $J = 2.6$  Hz, 1H), 7.00 (d,  $J = 8.6$  Hz, 1H), 6.86 (ddd,  $J = 0.9, 2.6, 8.3$  Hz, 1H), 5.60 (d,  $J = 3.4$  Hz, 1H), 4.16 (m, 1H), 4.09 (m, 1H), 3.98 (s, 3H), 3.82 (s, 3H), 3.79 (s, 3H), 3.72 (m, 1H), 3.60 (bs, 1H), 3.56 (t,  $J = 4.1$  Hz, 1H), 3.50 (m, 1H), 3.27 (d,  $J = 9.5$  Hz, 2H), 1.88 (m, 2H);  $^{13}\text{C}$  NMR (125 MHz,  $\text{CDCl}_3$ )  $\delta$  165.6, 159.9, 159.3, 158.4, 150.0, 143.7, 138.5, 137.5, 131.0, 130.0, 129.2, 128.3, 125.7, 123.5, 122.9, 122.8, 122.0, 116.4, 115.3, 114.0, 113.1, 111.0, 99.7, 68.0, 67.6, 65.1, 64.8, 61.8, 55.9, 55.4, 32.8; IR (film)  $\nu_{\text{max}}$  3402, 3390, 2937, 2837, 1714, 1670, 1605, 1527, 1502, 1483, 1461, 1367, 1274, 1246, 1207, 1180, 1081, 1051, 976  $\text{cm}^{-1}$ ; HRMS (FAB)  $m/z$ :  $[\text{M} + \text{Na}^+]$  calcd for  $\text{C}_{31}\text{H}_{31}\text{NNaO}_{11}$ , calcd 616.1794; found, 616.1786.

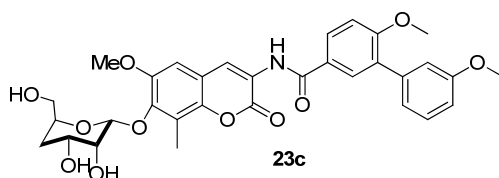

**N-(7-((2R,3R,4R,6S)-3,4-dihydroxy-6-(hydroxymethyl)tetrahydro-2H-pyran-2-yloxy)-6-methoxy-8-methyl-2-oxo-2H-chromen-3-yl)-3',6-dimethoxybiphenyl-3-carboxamide (23c):** Compound **23c** (33 mg, 63%) was obtained as a colorless amorphous solid.  $^1\text{H}$  NMR (500 MHz,  $\text{CDCl}_3$ )  $\delta$  8.70 (s, 1H), 8.69 (s, 1H), 7.84 (d,  $J = 2.4, 8.4$  Hz, 2H), 7.82 (d,  $J = 2.4$  Hz, 1H), 7.30 (t,  $J = 7.8$  Hz, 1H), 7.05 (dt,  $J = 1.8, 8.2$  Hz, 1H), 7.02 (t,  $J = 2.2$  Hz, 1H), 6.96 (d,  $J = 7.8$  Hz,

1H), 6.87 (dd,  $J = 2.7, 8.7$  Hz, 1H), 6.79 (s, 1H), 5.25 (d,  $J = 4.1$  Hz, 1H), 4.58 (m, 1H), 4.15 (m, 1H), 4.01 (d,  $J = 6.4$  Hz, 1H), 3.87 (s, 3H), 3.82 (s, 3H), 3.79 (s, 3H), 3.70 (m, 2H), 3.56 (m, 1H), 3.08 (d,  $J = 6.3$  Hz, 1H), 2.41 (s, 3H), 1.94 (m, 1H), 1.77 (m, 1H).  $^{13}\text{C}$  NMR (125 MHz,  $\text{CDCl}_3$ )  $\delta$  165.6, 159.9, 159.3, 159.0, 148.9, 146.2, 143.3, 138.5, 131.0, 130.0, 129.2, 128.3, 125.7, 123.7, 123.0, 122.0, 121.1, 116.3, 115.3, 113.1, 111.0, 106.3, 104.0, 68.7, 67.0, 65.6, 64.5, 56.1, 55.9, 55.4, 32.3, 10.0; IR (film)  $\nu_{\text{max}}$  3400, 3390, 2938, 2844, 1713, 1670, 1606, 1529, 1500, 1483, 1460, 1369, 1273, 1247, 1205, 1180, 1081, 1051, 976  $\text{cm}^{-1}$ ; HRMS (FAB)  $m/z$ :  $[\text{M} + \text{Na}^+]$  calcd for  $\text{C}_{32}\text{H}_{33}\text{NNaO}_{11}$ , calcd 630.1951; found, 630.1953.

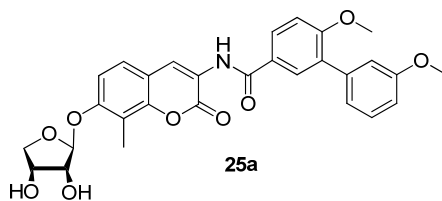

**N-(7-((2S)-3,4-dihydroxytetrahydrofuran-2-yloxy)-8-methyl-2-oxo-2H-chromen-3-yl)-3',6-dimethoxybiphenyl-3-carboxamide (25a):** Compound **24a** (98 mg, 80%) was obtained as a colorless amorphous solid and used without further purification.

A solution of **24a** (90 mg, 0.16 mmol) in THF:H<sub>2</sub>O:MeOH (3:1:1, 3 mL) was treated with LiOH (20 mg, 0.48 mmol), then stirred at rt for 2 h. The resulting reaction mixture was stirred at rt for 2 h, cooled to 0°C, then acidified to pH ~4 with 5% aqueous HCl. The organic layer was separated and the aqueous layer was extracted with dichloromethane (3 x 20 mL). The combined organic layers were dried over anhydrous Na<sub>2</sub>SO<sub>4</sub> and concentrated under reduced pressure. The crude residue was purified via column chromatography (SiO<sub>2</sub>, 100:5, CH<sub>2</sub>Cl<sub>2</sub>:MeOH) to yield diol **25a** as a colorless amorphous solid (72 mg, 84%).  $^1\text{H}$  NMR (500 MHz,  $\text{CDCl}_3$ )  $\delta$  8.76 (s, 1H), 8.70 (s, 1H), 7.90 (dd,  $J = 2.4, 8.5$  Hz, 1H), 7.88 (d,  $J = 2.3$  Hz, 1H), 7.36 (t,  $J = 7.9$  Hz, 1H), 7.30 (d,  $J = 8.6$  Hz, 1H), 7.12 (dt,  $J = 1.2, 7.8$  Hz, 1H), 7.09 (t,  $J = 2.4$  Hz, 1H) 7.08 (d,  $J =$

8.8 Hz, 1H), 7.06 (d,  $J = 8.8$  Hz, 1H), 6.93 (dd,  $J = 2.4, 8.3$  Hz, 1H), 5.68 (s, 1H), 4.59 (m, 1H), 4.46 (d,  $J = 4.7$  Hz, 1H), 4.23 (dd,  $J = 5.0, 10.0$  Hz, 1H), 4.00 (dd,  $J = 3.2, 10.0$  Hz, 1H) 3.89 (s, 3H), 3.86 (s, 3H), 3.33 (bs, 1H), 2.88 (bs, 1H), 2.28 (s, 3H);  $^{13}\text{C}$  NMR (125 MHz,  $\text{CDCl}_3$ )  $\delta$  165.7, 159.8, 159.4, 159.3, 156.0, 149.0, 138.6, 131.0, 129.9, 129.2, 128.2, 125.9, 125.7, 124.3, 122.0, 121.9, 115.3, 115.0, 114.3, 113.1, 111.9, 111.0, 106.5, 76.5, 73.2, 70.7, 55.9, 55.3, 8.4; IR (film)  $\nu_{\text{max}}$  3409, 3401, 2938, 2838, 1712, 1670, 1605, 1526, 1483, 1367, 1274, 1246, 1205, 1181, 1054, 1020, 972  $\text{cm}^{-1}$ ; HRMS (FAB)  $m/z$ :  $[\text{M} + \text{Na}^+]$  calcd for  $\text{C}_{29}\text{H}_{27}\text{NNaO}_9$ , calcd 556.1584; found, 556.1692.

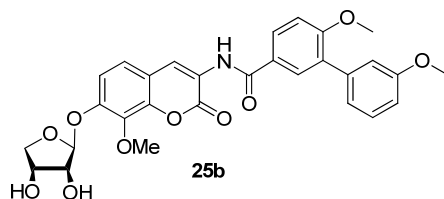

**N-(7-((2S)-3,4-dihydroxytetrahydrofuran-2-yloxy)-8-methoxy-2-oxo-2H-chromen-3-yl)-3',6-dimethoxybiphenyl-3-carboxamide (25b):** Compound **25b** (39 mg, 68%) was obtained as a colorless amorphous solid.  $^1\text{H}$  NMR (500 MHz,  $\text{CDCl}_3$ )  $\delta$  8.81 (s, 1H), 8.73 (s, 1H), 7.92 (d,  $J = 8.8$  Hz, 1H), 7.90 (s, 1H), 7.38 (t,  $J = 8.4$  Hz, 1H), 7.28 (d,  $J = 9.2$  Hz, 1H), 7.24 (s, 1H), 7.15 (t,  $J = 10.4$  Hz, 1H), 7.11 (s, 1H), 7.08 (d,  $J = 8.2$  Hz, 1H), 6.96 (d,  $J = 8.5$  Hz, 1H), 5.67 (d,  $J = 4.1$  Hz, 1H), 4.30 (m, 3H), 4.13 (d,  $J = 10.1$  Hz, 1H), 4.07 (s, 3H), 3.91 (s, 3H), 3.88 (s, 3H), 3.52 (bs, 1H), 3.14 (bs, 1H);  $^{13}\text{C}$  NMR (125 MHz,  $\text{CDCl}_3$ )  $\delta$  165.6, 159.9, 159.4, 158.5, 150.0, 143.7, 138.6, 138.0, 131.1, 130.0, 129.2, 128.2, 125.8, 123.5, 122.9, 122.7, 122.0, 116.5, 115.4, 115.3, 113.2, 111.1, 101.6, 74.7, 73.2, 69.4, 62.1, 55.9, 55.3; IR (film)  $\nu_{\text{max}}$  3479, 3406, 2938, 2837, 1713, 1670, 1605, 1525, 1481, 1367, 1274, 1244, 1207, 1180, 1053, 1020, 972  $\text{cm}^{-1}$ ; HRMS (FAB)  $m/z$ :  $[\text{M} + \text{Na}^+]$  calcd for  $\text{C}_{29}\text{H}_{27}\text{NNaO}_{10}$ , calcd 572.1533; found, 572.1523.



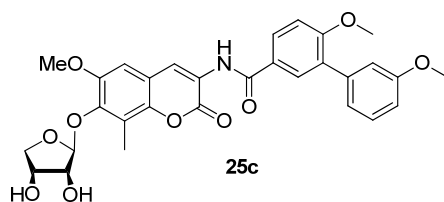

**N-(7-((2S)-3,4-dihydroxytetrahydrofuran-2-yloxy)-6-methoxy-8-methyl-2-oxo-2H-chromen-3-yl)-3',6-dimethoxybiphenyl-3-carboxamide (25c):** Compound **25c** (44 mg, 81%) was obtained as a colorless amorphous solid.  $^1\text{H}$  NMR (500 MHz,  $\text{CDCl}_3$ )  $\delta$  8.99 (s, 1H), 8.71 (s, 1H), 8.00 (dt,  $J = 2.3, 8.6$  Hz, 1H), 7.94 (t,  $J = 2.3$  Hz, 1H), 7.36 (t,  $J = 7.4$  Hz, 1H), 7.27 (d,  $J = 8.8$  Hz, 1H), 7.20 (s, 1H), 7.14 (s, 1H), 7.14 (dt,  $J = 2.4, 10.4$  Hz, 1H), 6.95 (dd,  $J = 2.4, 8.3$  Hz, 1H), 5.66 (s, 1H), 4.65 (m, 1H), 4.33 (d,  $J = 4.5$  Hz, 1H), 4.24 (m, 2H), 3.94 (s, 3H), 3.92 (s, 3H), 3.84 (s, 3H), 3.78 (dd,  $J = 5.2, 8.9$  Hz, 1H), 2.29 (s, 3H);  $^{13}\text{C}$  NMR (125 MHz,  $\text{CDCl}_3$ )  $\delta$  165.9, 160.4, 159.3, 150.8, 145.8, 144.0, 139.9, 131.4, 130.8, 129.9, 129.3, 127.0, 124.4, 124.2, 124.1, 122.7, 121.3, 116.6, 116.2, 113.5, 112.3, 110.2, 107.9, 76.6, 73.7, 71.1, 56.5, 56.3, 55.5, 9.5; IR (film)  $\nu_{\text{max}}$  3400, 3375, 2937, 2840, 1707, 1670, 1602, 1577, 1526, 1500, 1483, 1458, 1382, 1242, 1207, 1180, 1095, 1081, 1022, 960  $\text{cm}^{-1}$ ; HRMS (FAB)  $m/z$ :  $[\text{M} + \text{Na}^+]$  calcd for  $\text{C}_{30}\text{H}_{29}\text{NNaO}_{10}$ , calcd 586.1689; found, 586.1697.

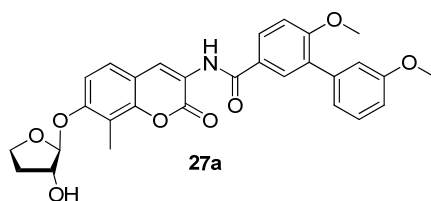

**N-(7-((2R)-3-hydroxytetrahydrofuran-2-yloxy)-8-methyl-2-oxo-2H-chromen-3-yl)-3',6-dimethoxybiphenyl-3-carboxamide (27a):** Compound **26a** (144 mg, 88%) was obtained as a colorless amorphous solid and used without further purification.

TBAF (1.0 M in THF, 0.4 mL, 0.4 mmol) was added dropwise to a solution of **27a** (130 mg, 0.2 mmol) in THF (3 mL) at rt. The resulting mixture was stirred at rt for 1 h, quenched with

water and extracted with ethyl acetate (3 x 10 mL). The combined organic extracts were washed with saturated sodium chloride solution, dried over anhydrous Na<sub>2</sub>SO<sub>4</sub> and concentrated under reduced pressure. The crude residue was purified via column chromatography (SiO<sub>2</sub>, 100:1, CH<sub>2</sub>Cl<sub>2</sub>:MeOH) to yield **27a** and **28a** (97 mg, 74%) as a mixture of diastereomers in a 7:6 ratio, respectively. Compound **27a** (52 mg, 40%) was obtained as a colorless amorphous solid. <sup>1</sup>H NMR (500 MHz, CDCl<sub>3</sub>) δ 8.80 (s, 1H), 8.72 (s, 1H), 7.93 (dd, *J* = 2.4, 8.5 Hz, 1H), 7.91 (d, *J* = 2.3 Hz, 1H), 7.39 (t, *J* = 7.9 Hz, 1H), 7.33 (d, *J* = 8.6 Hz, 1H), 7.13 (dt, *J* = 3.4, 4.0 Hz, 3H), 7.09 (d, *J* = 8.6 Hz, 1H), 6.95 (dd, *J* = 2.2, 7.9 Hz, 1H), 5.69 (s, 1H), 4.61 (t, *J* = 4.7 Hz, 1H), 4.25 (dd, *J* = 8.0, 16.0 Hz, 1H), 4.14 (td, *J* = 4.1, 8.9 Hz, 1H), 3.92 (s, 3H), 3.88 (s, 3H), 2.46 (dt, *J* = 6.8, 13.6 Hz, 1H), 2.29 (s, 3H), 2.24 (d, *J* = 5.3 Hz, 1H), 2.05 (m, 1H); <sup>13</sup>C NMR (125 MHz, CDCl<sub>3</sub>) δ 165.7, 159.9, 159.6, 159.5, 156.1, 149.2, 138.7, 131.2, 129.3, 128.3, 126.2, 125.8, 125.2, 124.4, 122.1, 122.1, 115.4, 115.2, 114.3, 113.3, 112.1, 111.2, 106.6, 76.1, 67.8, 56.0, 55.5, 32.5, 8.5; IR (film)  $\nu_{max}$  3404, 2951, 2939, 2902, 1712, 1670, 1649, 1629, 1605, 1527, 1502, 1481, 1369, 1265, 1207, 1105, 1065, 1033, 993, 962 cm<sup>-1</sup>; HRMS (FAB) *m/z*: [M + Na<sup>+</sup>] calcd for C<sub>29</sub>H<sub>27</sub>NNaO<sub>8</sub>, calcd 540.1634; found, 540.1622.

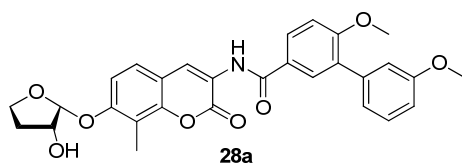

**N-(7-((2S)-3-hydroxytetrahydrofuran-2-yloxy)-8-methyl-2-oxo-2H-chromen-3-yl)-3',6-dimethoxybiphenyl-3-carboxamide (28a):** Compound **28a** (45 mg, 34%) was obtained as a colorless amorphous solid. <sup>1</sup>H NMR (500 MHz, CDCl<sub>3</sub>) δ 8.77 (s, 1H), 8.70 (bs, 1H), 7.91 (dd, *J* = 2.4, 8.5 Hz, 1H), 7.89 (d, *J* = 2.4 Hz, 1H), 7.36 (t, *J* = 7.9 Hz, 1H), 7.30 (d, *J* = 8.7 Hz, 1H), 7.08–7.14 (m, 3H), 7.06 (d, *J* = 8.7 Hz, 1H), 6.93 (ddd, *J* = 0.9, 2.6, 8.4 Hz, 1H), 5.66 (s, 1H), 4.58 (t, *J* = 5.1 Hz, 1H), 4.24 (q, *J* = 8.2 Hz, 1H), 4.11 (dt, *J* = 4.3, 9.1 Hz, 1H), 3.89 (s, 3H),

3.86 (s, 3H), 2.43 (m, 1H), 2.28 (d,  $J = 4.1$  Hz, 1H), 2.26 (s, 3H), 2.02 (m, 1H);  $^{13}\text{C}$  NMR (125 MHz,  $\text{CDCl}_3$ )  $\delta$  165.7, 159.9, 159.6, 159.4, 156.0, 149.2, 138.7, 131.1, 130.0, 129.3, 128.3, 126.1, 125.8, 124.4, 122.1, 122.0, 115.4, 115.1, 114.3, 113.3, 112.1, 111.1, 106.5, 76.1, 67.8, 56.0, 55.5, 32.4, 8.5; IR (film)  $\nu_{\text{max}}$  3400, 2948, 2942, 2889, 1711, 1668, 1649, 1605, 1527, 1505, 1484, 1370, 1267, 1204, 1106, 1067, 1034, 993, 963  $\text{cm}^{-1}$ ; HRMS (FAB)  $m/z$ :  $[\text{M} + \text{Na}^+]$  calcd for  $\text{C}_{29}\text{H}_{27}\text{NNaO}_8$ , calcd 540.1634; found, 540.1627.

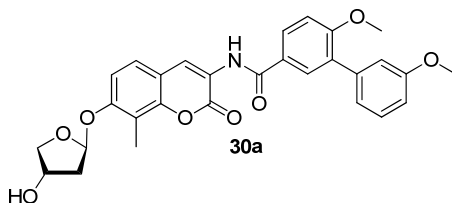

**N-(7-((2R)-4-hydroxytetrahydrofuran-2-yloxy)-8-methyl-2-oxo-2H-chromen-3-yl)-3',6-dimethoxybiphenyl-3-carboxamide (30a):** Compound **29a** (160 mg, 82%) was obtained as a colorless amorphous solid and used without further purification.

TBAF (1.0M in THF, 0.5 mL, 0.5 mmol) was added dropwise to solution of **29a** (157 mg, 0.25 mmol) in THF (4 mL) at rt. The reaction mixture was stirred at rt for 1 h, quenched with water and extracted with ethyl acetate (3 x 10 mL). The combined organic extracts were washed with saturated sodium chloride solution, dried over anhydrous  $\text{Na}_2\text{SO}_4$ , filtered and concentrated. The crude residue was purified via column chromatography ( $\text{SiO}_2$ , 100:1,  $\text{CH}_2\text{Cl}_2$ :MeOH) to yield **30a** and **31a** (96 mg, 75%) as a mixture of diastereomers in a 4:3 ratio, respectively. Compound **30a** (55 mg, 43%) was obtained as a colorless amorphous solid.  $^1\text{H}$  NMR (500 MHz,  $\text{CDCl}_3$ )  $\delta$  8.80 (s, 1H), 8.71 (bs, 1H), 7.91 (dd,  $J = 2.4, 8.6$  Hz, 1H), 7.89 (d,  $J = 2.4$  Hz, 1H), 7.36 (t,  $J = 7.9$  Hz, 1H), 7.35 (d,  $J = 8.6$  Hz, 1H), 7.19 (d,  $J = 8.8$  Hz, 1H), 7.12 (dt,  $J = 1.78, 8.0$  Hz, 1H), 7.09 (t,  $J = 2.6$  Hz, 1H), 7.1 (d,  $J = 8.8$  Hz, 1H), 6.93 (ddd,  $J = 0.8, 2.6, 8.3$  Hz, 1H), 6.03 (dd,  $J = 2.7, 5.6$  Hz, 1H), 4.73 (m, 1H), 4.11 (dd,  $J = 4.3, 9.9$  Hz, 1H), 3.95 (dt,  $J = 1.4, 9.9$  Hz, 1H),

3.90 (s, 3H), 3.86 (s, 3H), 2.54 (ddd,  $J = 3.0, 6.3, 14.6$  Hz, 1H), 2.41 (m, 1H), 2.30 (s, 3H), 2.29 (bs, 1H);  $^{13}\text{C}$  NMR (125 MHz,  $\text{CDCl}_3$ )  $\delta$  165.7, 159.9, 159.4, 156.7, 149.2, 138.7, 131.1, 130.1, 129.3, 128.3, 126.2, 125.8, 125.2, 124.4, 122.1, 122.1, 115.4, 115.2, 114.4, 113.3, 112.4, 111.1, 102.9, 75.1, 71.6, 56.0, 55.5, 43.1, 8.5; IR (film)  $\nu_{\text{max}}$  3404, 2923, 2845, 1711, 1670, 1606, 1526, 1502, 1369, 1242, 1205, 1178, 1115, 1057, 995, 974  $\text{cm}^{-1}$ ; HRMS (FAB)  $m/z$ :  $[\text{M} + \text{Na}^+]$  calcd for  $\text{C}_{29}\text{H}_{27}\text{NNaO}_8$ , calcd 540.1634; found, 540.1629.

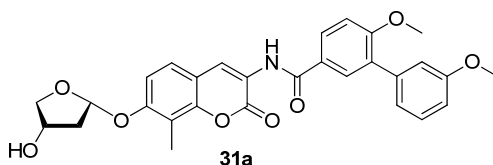

**N-(7-((2S)-4-hydroxytetrahydrofuran-2-yloxy)-8-methyl-2-oxo-2H-chromen-3-yl)-3',6-dimethoxybiphenyl-3-carboxamide (31a):** Compound **31a** (41 mg, 32%) was obtained as a colorless amorphous solid.  $^1\text{H}$  NMR (500 MHz,  $\text{CDCl}_3$ )  $\delta$  8.80 (s, 1H), 8.72 (bs, 1H), 7.91 (dd,  $J = 2.5, 8.6$  Hz, 1H), 7.89 (d,  $J = 2.3$  Hz, 1H), 7.36 (t,  $J = 7.9$  Hz, 1H), 7.35 (d,  $J = 8.6$  Hz, 1H), 7.16 (d,  $J = 8.6$  Hz, 1H), 7.12 (dt,  $J = 1.5, 7.7$  Hz, 1H), 7.09 (t,  $J = 2.6$  Hz, 1H), 7.07 (d,  $J = 8.6$  Hz, 1H), 6.93 (ddd,  $J = 0.8, 2.6, 8.4$  Hz, 1H), 5.59 (d,  $J = 4.3$  Hz, 1H), 4.47 (m, 1H), 4.18 (dt,  $J = 4.1, 8.9$  Hz, 1H), 3.98 (q,  $J = 8.3$  Hz, 1H), 3.89 (s, 3H), 3.86 (s, 3H), 2.45 (d,  $J = 9.8$  Hz, 1H), 2.39 (m, 1H), 2.36 (s, 3H), 2.09 (m, 1H);  $^{13}\text{C}$  NMR (125 MHz,  $\text{CDCl}_3$ )  $\delta$  165.7, 159.9, 159.4, 153.9, 149.1, 138.7, 131.1, 130.1, 129.3, 128.3, 126.1, 125.9, 125.1, 124.1, 122.4, 122.1, 115.6, 115.4, 114.9, 113.2, 113.2, 111.1, 100.6, 73.0, 66.6, 56.0, 55.4, 31.7, 8.7; IR (film)  $\nu_{\text{max}}$  3400, 2925, 2845, 1707, 1670, 1605, 1527, 1500, 1367, 1242, 1205, 1180, 1113, 1077, 1034, 987, 974  $\text{cm}^{-1}$ ; HRMS (FAB)  $m/z$ :  $[\text{M} + \text{Na}^+]$  calcd for  $\text{C}_{29}\text{H}_{27}\text{NNaO}_8$ , calcd 540.1634; found, 540.1632.

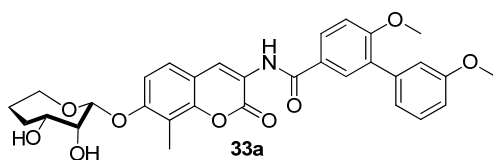

**N-(7-((2R,3R,4R)-3,4-dihydroxyoxepan-2-yloxy)-8-methyl-2-oxo-2H-chromen-3-yl)-3',6-dimethoxybiphenyl-3-carboxamide (33a):** Compound **32a** (180 mg, 78%) was obtained as a colorless amorphous solid and used without further purification.

A solution of **32a** (172 mg, 0.29 mmol) in THF:H<sub>2</sub>O:MeOH (3:1:1, 5 mL) was treated with LiOH (37 mg, 0.88 mmol) at rt. The reaction mixture stirred at rt for 2 h, cooled to 0°C, then acidified to pH ~4 with 5% aqueous HCl. The organic layer was separated and the aqueous layer was extracted with dichloromethane (3 x 20 mL). The combined organic layers were washed with saturated sodium chloride solution, dried over anhydrous Na<sub>2</sub>SO<sub>4</sub> and concentrated under reduced pressure. The crude residue was purified via column chromatography (SiO<sub>2</sub>, 100:5, CH<sub>2</sub>Cl<sub>2</sub>:MeOH) to yield diol **33a** (118 mg, 68%) as a colorless amorphous solid. <sup>1</sup>H NMR (500 MHz, CDCl<sub>3</sub>) δ 8.74 (s, 1H), 8.65 (s, 1H), 7.85 (dd, *J* = 2.5, 8.6 Hz, 1H), 7.82 (d, *J* = 2.6 Hz, 1H), 7.30 (t, *J* = 8.2 Hz, 1H), 7.29 (d, *J* = 9.0 Hz, 1H), 7.05 (dt, *J* = 1.2, 9.1 Hz, 1H), 7.03 (t, *J* = 2.4 Hz, 1H), 7.02 (d, *J* = 8.1 Hz, 1H), 6.99 (d, *J* = 8.8 Hz, 1H), 6.86 (ddd, *J* = 0.9, 2.7, 8.3 Hz, 1H), 5.39 (d, *J* = 2.7 Hz, 1H), 4.22 (m, 1H), 3.95 (dd, *J* = 3.1, 8.8 Hz, 2H), 3.83 (s, 3H), 3.79 (s, 3H), 3.58 (dd, *J* = 3.1, 10.5 Hz, 1H), 2.88 (d, *J* = 5.3 Hz, 1H), 2.32 (s, 3H), 2.20 (d, *J* = 6.5 Hz, 1H), 2.10 (m, 1H), 1.87 (m, 1H), 1.76 (m, 1H), 1.65 (m, 1H); <sup>13</sup>C NMR (125 MHz, CDCl<sub>3</sub>) δ 165.6, 159.8, 159.3, 155.8, 149.0, 138.6, 131.1, 130.0, 129.2, 128.2, 126.0, 125.8, 123.9, 122.4, 122.0, 116.2, 115.6, 115.3, 114.9, 113.1, 112.7, 111.0, 98.8, 75.8, 71.5, 65.3, 55.9, 55.3, 29.9, 25.7, 8.7; IR (film) *v*<sub>max</sub> 3402, 3350, 2931, 2877, 2834, 1697, 1670, 1606, 1531, 1504, 1369, 1238, 1207, 1182, 1097, 1076, 995, 970 cm<sup>-1</sup>; HRMS (FAB) *m/z*: [M + Na<sup>+</sup>] calcd for C<sub>31</sub>H<sub>31</sub>NO<sub>9</sub>Na, calcd 584.1897; found, 584.1884.

**Representative procedure for Mitsunobu coupling with sugar mimics:**

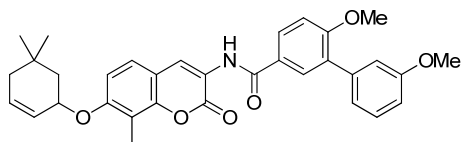

**N-(7-(5,5-dimethylcyclohex-2-enyloxy)-8-methyl-2-oxo-2H-chromen-3-yl)-3',6-dimethoxybiphenyl-3-carboxamide (40a).** Diisopropylazodicarboxylate (231 mg, 1.14 mmol) was added to a solution of allylic alcohol **37** (72 mg, 0.57 mmol), phenol **6a** (247 mg, 0.57 mmol) and triphenylphosphine (299 mg, 1.14 mmol) in anhydrous THF (10 mL). After 2 h, the solvent was removed and the residue purified via column chromatography (SiO<sub>2</sub>, 100:1, CH<sub>2</sub>Cl<sub>2</sub>:acetone) to afford compound **40a** as a colorless amorphous solid (143 mg, 47 %). <sup>1</sup>H NMR (400 MHz, CDCl<sub>3</sub>) δ 8.81 (s, 1H), 8.72 (s, 1H), 7.95–7.92 (m, 2H), 7.40–7.28 (m, 2H), 7.16–7.07 (m, 3H), 6.96–6.93 (m, 2H), 5.92–5.85 (m, 2H), 4.95 (m, 1H), 3.91 (s, 3H), 3.88 (s, 3H), 2.32 (s, 3H), 2.07–1.67 (m, 4H), 1.09 (s, 3H), 1.03 (s, 3H). <sup>13</sup>C NMR (100 MHz, CDCl<sub>3</sub>) δ 165.6, 159.9, 159.7, 159.5, 157.9, 149.6, 138.8, 131.1, 130.5, 130.1, 129.3, 128.3, 126.3, 125.7, 125.0, 124.6, 122.2, 121.6, 115.4, 115.2, 113.32, 113.28, 111.1, 110.4, 73.0, 56.0, 55.5, 41.6, 39.2, 30.7, 30.5, 27.2, 8.5. IR (film)  $\nu_{max}$  3405, 3031, 2950, 2927, 2868, 1710, 1672, 1605, 1524, 1500, 1367, 1267, 1242, 1205, 1180, 1101, 1022 cm<sup>-1</sup>. HRMS (ESI<sup>+</sup>) m/z: [M + H<sup>+</sup>] calcd for C<sub>33</sub>H<sub>34</sub>NO<sub>6</sub>, 540.2386; found 540.2382.

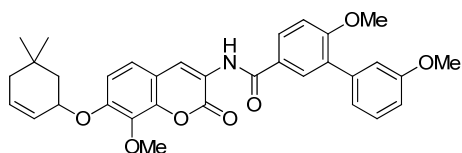

**N-(7-(5,5-dimethylcyclohex-2-enyloxy)-8-methoxy-2-oxochromen-3-yl)-3',6-dimethoxybiphenyl-3-carboxamide (40b).** Compound **40b** was obtained as a white amorphous solid (32 mg, 71%). <sup>1</sup>H NMR (400 MHz, CDCl<sub>3</sub>) δ 8.73 (s, 1H), 8.64 (s, 1H), 7.85–7.81 (m, 2H), 7.29 (t, *J* = 8.1 Hz, 1H), 7.14 (d, *J* = 8.7 Hz, 1H), 7.06–6.99 (m, 3H), 6.91 (d, *J* =

8.7 Hz, 1H), 6.87–6.85 (m, 1H), 5.83–5.75 (m, 2H), 4.89 (m, 1H), 3.91 (s, 3H), 3.83 (s, 3H), 3.79 (s, 3H), 1.96–1.61 (m, 4H), 0.99 (s, 3H), 0.93 (s, 3H).  $^{13}\text{C}$  NMR (100 MHz,  $\text{CDCl}_3$ )  $\delta$  165.5, 159.8, 159.3, 159.0, 152.6, 144.3, 138.6, 137.4, 131.0, 130.4, 130.0, 129.2, 128.2, 126.0, 124.8, 124.0, 122.4, 122.1, 122.0, 115.2, 114.5, 113.2, 1112.8, 111.0, 74.0, 61.5, 55.9, 55.3, 41.4, 39.0, 30.9, 30.6, 26.7. IR (film)  $\nu_{\text{max}}$  3402, 3085, 3025, 2920, 2847, 1714, 1670, 1603, 1522, 1500, 1367, 1278, 1246, 1148, 1099, 1082, 1022  $\text{cm}^{-1}$ . HRMS ( $\text{ESI}^+$ )  $m/z$ :  $[\text{M} + \text{Na}^+]$  calcd for  $\text{C}_{33}\text{H}_{33}\text{NO}_7\text{Na}$ , 578.2155; found 578.2150.

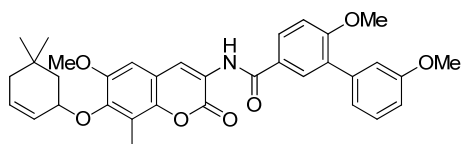

**N-(7-(5,5-dimethylcyclohex-2-enyloxy)-6-methoxy-8-methyl-2-oxochromen-3-yl)-3',6-dimethoxybiphenyl-3-carboxamide (40c).** Compound **40c** was obtained as a white amorphous solid (73 mg, 88%).  $^1\text{H}$  NMR (400 MHz,  $\text{CDCl}_3$ )  $\delta$  8.78 (s, 1H), 8.75 (s, 1H), 7.95–7.90 (m, 2H), 7.36 (t,  $J = 8.2$  Hz, 1H), 7.14–7.05 (m, 3H), 6.93 (d,  $J = 8.1$  Hz, 1H), 6.84 (s, 1H), 5.82–5.78 (m, 2H), 4.76 (m, 1H), 3.89 (s, 3H), 3.88 (s, 3H), 3.86 (s, 3H), 2.38 (s, 3H), 2.09–1.67 (m, 4H), 1.04 (s, 3H), 0.91 (s, 3H).  $^{13}\text{C}$  NMR (100 MHz,  $\text{CDCl}_3$ )  $\delta$  165.5, 159.8, 159.4, 159.3, 150.4, 147.8, 143.5, 138.6, 131.0, 130.0, 129.2, 129.0, 128.2, 126.6, 126.1, 123.8, 122.8, 122.0, 120.8, 115.3, 115.1, 113.1, 111.0, 106.5, 78.1, 56.0, 55.9, 55.3, 42.4, 39.1, 31.3, 30.9, 26.2, 9.9. IR (film)  $\nu_{\text{max}}$  3406, 3084, 3028, 2999, 2943, 2899, 2864, 1697, 1672, 1605, 1580, 1535, 1501, 1371, 1279, 1234, 1207, 1180, 1099, 1016  $\text{cm}^{-1}$ . HRMS ( $\text{ESI}^+$ )  $m/z$ :  $[\text{M} + \text{Na}^+]$  calcd for  $\text{C}_{34}\text{H}_{35}\text{NO}_7\text{Na}$ , 592.2311; found 592.2324.

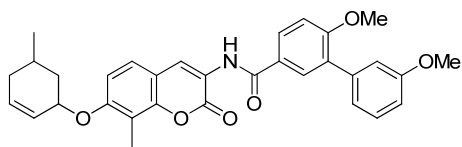

**3',6-dimethoxy-N-(8-methyl-7-(5-methylcyclohex-2-enyloxy)-2-oxo-2H-chromen-3-yl)biphenyl-3-carboxamide (41a).** Compound **41a** was obtained as a white amorphous solid (180 mg, 55%).  $^1\text{H}$  NMR (400 MHz,  $\text{CDCl}_3$ )  $\delta$  8.81 (s, 1H), 8.72 (s, 1H), 7.94–7.92 (m, 2H), 7.40–7.33 (m, 2H), 7.16–7.07 (m, 3H), 6.97–6.95 (m, 2H), 6.08–5.92 (m, 2H), 4.86 (m, 1H), 3.91 (s, 3H), 3.88 (s, 3H), 2.35 (s, 3H), 2.33–2.28 (m, 1H), 2.09–1.60 (m, 4H), 1.07 (m, 3H).  $^{13}\text{C}$  NMR (100 MHz,  $\text{CDCl}_3$ )  $\delta$  165.6, 159.9, 159.7, 159.5, 157.8, 149.6, 138.8, 133.7, 131.1, 130.1, 129.3, 128.3, 126.3, 125.7, 124.6, 124.4, 122.1, 121.6, 115.4 (2C), 113.4, 113.3, 111.1, 110.8, 71.4, 56.0, 55.5, 36.6, 33.9, 24.1, 21.7, 8.6. IR (film)  $\nu_{\text{max}}$  3402, 3032, 2980, 2906, 2826, 1713, 1676, 1607, 1554, 1375, 1251, 1093  $\text{cm}^{-1}$ . HRMS (ESI $^+$ )  $m/z$ :  $[\text{M} + \text{H}^+]$  calcd for  $\text{C}_{32}\text{H}_{32}\text{NO}_6$ , 516.2230; found 526.2229.

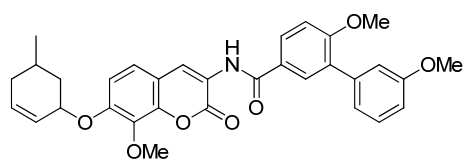

**3',6-dimethoxy-N-(8-methoxy-7-(5-methylcyclohex-2-enyloxy)-2-oxochromen-3-yl)biphenyl-3-carboxamide (41b).** Compound **41b** was obtained as a white amorphous solid (38 mg, 81%).  $^1\text{H}$  NMR (500 MHz,  $\text{CDCl}_3$ )  $\delta$  8.73 (s, 1H), 8.64 (s, 1H), 7.85–7.81 (m, 2H), 7.29 (t,  $J = 8.3$  Hz, 1H), 7.13 (d,  $J = 8.2$  Hz, 1H), 7.06–7.02 (m, 3H), 6.91 (d,  $J = 8.2$  Hz, 1H), 6.87–6.85 (m, 1H), 6.01–5.99 (m, 1H), 5.87–5.83 (m, 1H), 4.80 (m, 1H), 3.91 (s, 3H), 3.83 (s, 3H), 3.79 (s, 3H), 2.19–2.15 (m, 1H), 2.10–1.98 (m, 2H), 1.64–1.57 (m, 1H), 1.44–1.38 (m, 1H).  $^{13}\text{C}$  NMR (125 MHz,  $\text{CDCl}_3$ )  $\delta$  165.5, 159.8, 159.3, 159.0, 152.6, 144.2, 138.6, 137.6, 133.8, 131.0, 130.0, 129.2, 128.2, 126.0, 124.1, 124.0, 122.4, 122.05, 122.00, 115.2, 114.5, 113.2, 113.1, 111.0, 72.2, 61.5, 55.9, 55.3, 36.3, 33.8, 23.9, 12.5. IR (film)  $\nu_{\text{max}}$  3398, 3085, 3028, 2947, 2908, 2833, 1713, 1672, 1605, 1574, 1522, 1502, 1462, 1367, 1275, 11246, 1207,



1180, 1024  $\text{cm}^{-1}$ . HRMS (ESI<sup>+</sup>)  $m/z$ :  $[M + \text{Na}^+]$  calcd for  $\text{C}_{32}\text{H}_{31}\text{NO}_7\text{Na}$ , 564.1999; found 564.1983.

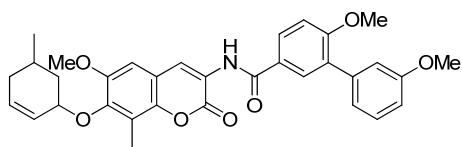

**3',6-dimethoxy-N-(6-methoxy-8-methyl-7-(5-methylcyclohex-2-enyloxy)-2-oxochromen-3-yl)biphenyl-3-carboxamide (41c).** Compound **41c** was obtained as a white amorphous solid (64 mg, 96%). <sup>1</sup>H NMR (400 MHz,  $\text{CDCl}_3$ )  $\delta$  8.73 (s, 1H), 8.68 (s, 1H), 7.86–7.83 (m, 2H), 7.30 (t,  $J = 8.3$  Hz, 1H), 7.07–6.99 (m, 3H), 6.87–6.85 (m, 1H), 6.78 (s, 1H), 5.95–5.91 (m, 1H), 5.80–5.74 (m, 1H), 4.67 (bs, 1H), 3.83 (s, 6H), 3.79 (s, 3H), 2.30 (s, 3H), 2.22–2.15 (m, 2H), 1.97–1.65 (m, 1H), 1.65–1.54 (m, 1H), 1.36–1.25 (m, 1H), 0.95 (d, 3H). <sup>13</sup>C NMR (100 MHz,  $\text{CDCl}_3$ )  $\delta$  165.6, 159.8, 159.5, 159.3, 150.5, 147.6, 143.5, 138.6, 133.0, 131.0, 130.0, 129.2, 128.2, 126.1, 125.5, 123.9, 122.8, 122.0, 120.9, 115.2, 115.0, 113.1, 111.0, 106.5, 75.5, 56.0, 55.9, 55.3, 37.1, 34.0, 23.9, 21.7, 9.7. IR (film)  $\nu_{\text{max}}$  3408, 3084, 3028, 2943, 2899, 2867, 1697, 1672, 1605, 1580, 1531, 1501, 1371, 1234, 1207, 1178, 1099, 1016  $\text{cm}^{-1}$ . HRMS (ESI<sup>+</sup>)  $m/z$ :  $[M + \text{H}^+]$  calcd for  $\text{C}_{33}\text{H}_{34}\text{NO}_7$ , 556.2335; found 556.2325.

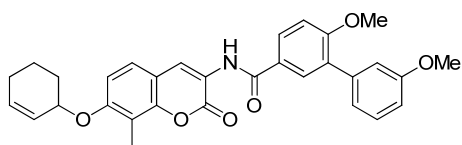

**N-(7-(cyclohex-2-enyloxy)-8-methyl-2-oxo-2H-chromen-3-yl)-3',6-dimethoxybiphenyl-3-carboxamide (42a).** Compound **42a** was obtained as a colorless amorphous solid (103 mg, 56%). <sup>1</sup>H NMR (400 MHz,  $\text{CDCl}_3$ )  $\delta$  8.81 (s, 1H), 8.72 (s, 1H), 7.95–7.92 (m, 2H), 7.40–7.28 (m, 2H), 7.16–7.07 (m, 3H), 6.97–6.93 (m, 2H), 6.03–5.90 (m, 2H), 4.88 (m, 1H), 3.91 (s, 3H), 3.88 (s, 3H), 2.33 (s, 3H), 2.30–2.24 (m, 2H), 2.06–1.90 (m, 3H), 1.81–1.72 (m, 1H). <sup>13</sup>C NMR (100 MHz,  $\text{CDCl}_3$ )  $\delta$  165.6, 159.9, 159.7, 159.5, 157.8, 149.6, 138.8, 132.8, 131.1, 130.1, 129.3,

128.3, 126.3, 126.0, 125.7, 124.6, 122.2, 121.6, 115.4, 115.3, 113.4, 113.3, 111.1, 110.8, 72.1, 56.0, 55.5, 28.7, 25.3, 19.1, 8.6. IR (film)  $\nu_{max}$  3404, 3041, 2934, 2835, 1709, 1670, 1605, 1526, 1502, 1369, 1267, 1244, 1205, 1180, 1101, 1022  $\text{cm}^{-1}$ . HRMS (ESI<sup>+</sup>)  $m/z$ : [M + H<sup>+</sup>] calcd for C<sub>31</sub>H<sub>30</sub>NO<sub>6</sub>, 512.2073; found 512.2077.

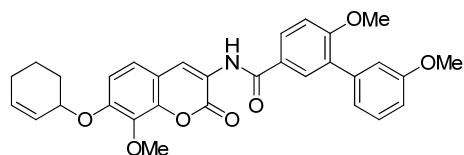

**N-(7-(cyclohex-2-enyloxy)-8-methoxy-2-oxochromen-3-yl)-3',6-dimethoxybiphenyl-3-carboxamide (42b).** Compound **42b** was obtained as a white amorphous solid (44 mg, 88%). <sup>1</sup>H NMR (400 MHz, CDCl<sub>3</sub>)  $\delta$  8.82 (s, 1H), 8.74 (s, 1H), 7.94–7.92 (m, 2H), 7.39 (t,  $J$  = 8.2 Hz, 1H), 7.22 (d,  $J$  = 8.3 Hz, 1H), 7.15–7.08 (m, 3H), 7.00–6.95 (m, 2H), 6.03–5.90 (m, 2H), 4.91 (m, 1H), 4.01 (s, 3H), 3.92 (s, 3H), 3.88 (s, 3H), 2.19–2.16 (m, 1H), 2.09–1.91 (m, 3H), 1.71–1.66 (m, 2H). <sup>13</sup>C NMR (100 MHz, CDCl<sub>3</sub>)  $\delta$  165.6, 159.8, 159.3, 159.0, 152.5, 144.2, 138.6, 137.5, 132.9, 131.1, 130.0, 129.2, 128.2, 126.0, 125.6, 124.0, 122.4, 122.1, 122.0, 115.3, 114.6, 113.2 (2C), 111.0, 72.9, 61.5, 55.9, 55.3, 28.5, 25.1, 18.9. IR (film)  $\nu_{max}$  3398, 3083, 3025, 2949, 2918, 2906, 2870, 1713, 1672, 1603, 1574, 1522, 1502, 1462, 1366, 1277, 1248, 1207, 1145, 1022  $\text{cm}^{-1}$ . HRMS (ESI<sup>+</sup>)  $m/z$ : [M + Na<sup>+</sup>] calcd for C<sub>31</sub>H<sub>29</sub>NO<sub>7</sub>Na 550.1842; found 550.1844.

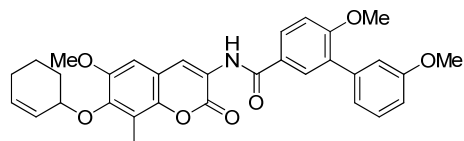

**N-(7-(cyclohex-2-enyloxy)-6-methoxy-8-methyl-2-oxochromen-3-yl)-3',6-dimethoxybiphenyl-3-carboxamide (42c).** Compound **42c** was obtained as a white amorphous solid (59 mg, 80%). <sup>1</sup>H NMR (400 MHz, CDCl<sub>3</sub>)  $\delta$  8.80 (s, 1H), 8.77 (s, 1H), 7.94–7.92 (m, 2H), 7.38 (t,  $J$ =7.9, 1H), 7.15–7.06 (m, 3H), 6.95 (d,  $J$ =8.1, 1H), 6.85 (s, 1H), 5.97–5.88

(m, 2H), 4.77 (bs, 1H), 3.91 (s, 6H), 3.87 (s, 3H), 2.40 (s, 3H), 2.19–2.15 (m, 1H), 2.04–1.81 (m, 4H), 1.66–1.63 (m, 1H).  $^{13}\text{C}$  NMR (100 MHz,  $\text{CDCl}_3$ )  $\delta$  165.5, 159.8, 159.4, 159.3, 150.5, 147.5, 143.5, 138.6, 131.9, 131.0, 130.0, 129.2, 128.2, 127.1, 126.1, 123.9, 122.8, 122.0, 120.9, 115.3, 115.0, 113.1, 111.0, 106.5, 76.1, 56.0, 55.9, 55.3, 29.2, 25.2, 19.0, 9.8. IR (film)  $\nu_{\text{max}}$  3403, 3086, 3021, 2935, 2867, 1709, 1670, 1603, 1580, 1524, 1501, 1383, 1242, 1207, 1180, 1094, 1051, 1022  $\text{cm}^{-1}$ . HRMS (ESI<sup>+</sup>)  $m/z$ :  $[\text{M} + \text{Na}^+]$  calcd for  $\text{C}_{32}\text{H}_{31}\text{NO}_7\text{Na}$ , 564.1999; found 564.1990.

### Representative procedure for olefin dihydroxylation:

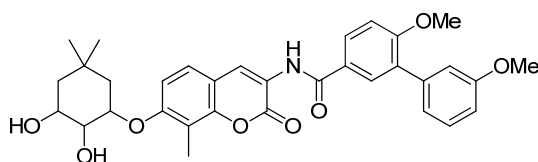

**N-(7-((1R,2R,3R)-2,3-dihydroxy-5-methylcyclohexyloxy)-8-methyl-2-oxo-2H-chromen-3-yl)-3',6-dimethoxybiphenyl-3-carboxamide (43a)**. A solution of **40a** (40 mg, 0.074 mmol) in acetone (3 mL) was treated with *N*-Methylmorpholine-*N*-oxide (17.6 mg, 0.15 mmol), followed by an aqueous solution of  $\text{OsO}_4$  (4%, 47  $\mu\text{L}$ ). After 12 h, the solvent was removed and the residue was purified via column chromatography ( $\text{SiO}_2$ , 20:1,  $\text{CH}_2\text{Cl}_2$ :acetone) to afford compound **43a** as a white amorphous solid (34 mg, 80%).  $^1\text{H}$  NMR (400 MHz,  $\text{CDCl}_3$ )  $\delta$  8.79 (s, 1H), 8.72 (s, 1H), 7.95–7.92 (m, 2H), 7.41–7.33 (m, 2H), 7.16–7.08 (m, 3H), 6.97–6.94 (m, 2H), 4.80–4.70 (m, 1H), 4.26 (m, 1H), 3.92 (s, 3H), 3.88 (s, 3H), 3.78–3.75 (m, 1H), 2.90 (bs, 1H), 2.50 (bs, 1H), 2.48 (s, 3H), 1.90–1.84 (m, 2H), 1.51–1.39 (m, 2H), 1.23 (s, 3H), 1.02 (s, 3H).  $^{13}\text{C}$  NMR (100 MHz,  $\text{CDCl}_3$ )  $\delta$  165.7, 160.0, 159.6, 159.5, 157.4, 149.5, 138.8, 131.2, 130.2, 129.4, 128.4, 126.2, 125.9, 124.5, 122.2, 121.8, 115.4, 115.2, 113.7, 113.3, 111.2, 110.5, 76.6, 74.2, 69.6, 56.1, 55.5, 41.8, 41.2, 32.2, 31.1, 29.3, 8.6. IR (film)  $\nu_{\text{max}}$  3485, 3402, 2928,

2891, 1710, 1664, 1605, 1531, 1495, 1404, 1371, 1353, 1258, 1095, 1045  $\text{cm}^{-1}$ . HRMS (ESI<sup>+</sup>)  $m/z$ : [M + Na<sup>+</sup>] calcd for C<sub>33</sub>H<sub>35</sub>NO<sub>8</sub>Na, 596.2260; found 596.2263.

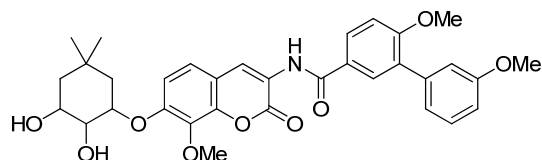

**N-(7-(2,3-dihydroxy-5,5-dimethylcyclohexyloxy)-8-methoxy-2-oxochromen-3-yl)-3',6-dimethoxybiphenyl-3-carboxamide (43b).** Compound **43b** was obtained as a white amorphous solid (28 mg, 82%). <sup>1</sup>H NMR (500 MHz, CDCl<sub>3</sub>)  $\delta$  8.74 (s, 1H), 8.65 (s, 1H), 7.85 (dd,  $J$  = 8.6, 2.4, 1H), 7.82 (d,  $J$  = 2.4 Hz, 1H), 7.30 (t,  $J$  = 7.9 Hz, 1H), 7.16 (d,  $J$  = 8.8 Hz, 1H), 7.06–7.04 (m, 1H), 7.02–7.01 (m, 2H), 6.90 (d,  $J$  = 8.8 Hz, 1H), 6.88–6.85 (m, 1H), 4.51–4.47 (m, 1H), 4.18–4.17 (m, 1H), 3.96 (s, 3H), 3.83 (s, 3H), 3.79 (s, 3H), 3.77–3.74 (m, 1H), 3.24 (bs, 1H), 2.37 (bs, 1H), 1.89–1.85 (m, 1H), 1.76–1.72 (m, 1H), 1.45–1.37 (m, 2H), 1.14 (s, 3H), 0.94 (s, 3H). <sup>13</sup>C NMR (125 MHz, CDCl<sub>3</sub>)  $\delta$  165.6, 159.9, 159.3, 158.7, 152.7, 144.1, 138.6, 137.8, 131.1, 130.0, 129.2, 128.2, 125.9, 123.7, 122.8, 122.5, 122.0, 115.5, 115.3, 114.4, 113.1, 111.0, 79.5, 74.8, 69.8, 61.9, 55.9, 55.3, 42.3, 41.6, 32.7, 32.3, 28.6. IR (film)  $\nu_{\text{max}}$  3480, 3407, 2930, 2870, 1713, 1670, 1605, 1524, 1502, 1461, 1367, 1277, 1244, 1207, 1180, 1049, 1035  $\text{cm}^{-1}$ . HRMS (ESI<sup>+</sup>)  $m/z$ : [M + Na<sup>+</sup>] calcd for C<sub>33</sub>H<sub>35</sub>NO<sub>9</sub>Na, 612.2210; found 612.2203.

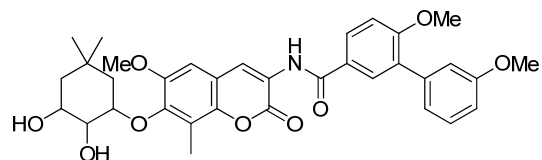

**N-(7-(2,3-dihydroxy-5,5-dimethylcyclohexyloxy)-6-methoxy-8-methyl-2-oxo-2H-chromen-3-yl)-3',6-dimethoxybiphenyl-3-carboxamide (43c).** Compound **43c** was obtained as a white amorphous solid (52 mg, 83%). <sup>1</sup>H NMR (500 MHz, CDCl<sub>3</sub>)  $\delta$  8.81 (s, 1H), 8.77 (s, 1H), 7.94–7.90 (m, 2H), 7.38 (t,  $J$  = 8.0 Hz, 1H), 7.14–7.04 (m, 3H), 6.96–6.93 (m 1H), 6.89 (s, 1H), 4.40–

4.39 (m, 1H), 4.20 (m, 1H), 4.09 (s, 1H), 3.95 (s, 3H), 3.91 (s, 3H), 3.87 (s, 3H), 3.80–3.77 (m, 1H), 2.67 (s, 1H), 2.41 (s, 3H), 1.82–1.73 (m, 2H), 1.53–1.40 (m, 2H), 1.07 (s, 3H), 0.97 (s, 3H).  $^{13}\text{C}$  NMR (125 MHz,  $\text{CDCl}_3$ )  $\delta$  165.6, 159.9, 159.32, 159.26, 149.4, 146.9, 143.6, 138.6, 131.1, 130.0, 129.2, 128.2, 125.9, 123.5, 123.2, 122.0, 121.0, 115.5, 115.3, 113.1, 111.0, 106.5, 81.8, 75.8, 70.0, 56.1, 55.9, 55.3, 43.7, 41.3, 33.5, 32.3, 28.0, 10.0. IR (film)  $\nu_{\text{max}}$  3497, 3404, 2955, 2930, 2860, 1716, 1670, 1602, 1580, 1524, 1501, 1464, 1382, 1277, 1245, 1207, 1137, 1074  $\text{cm}^{-1}$ .  $^1\text{H}$  NMR (ESI $^+$ )  $m/z$ :  $[\text{M} + \text{Na}^+]$  calcd for  $\text{C}_{34}\text{H}_{37}\text{NO}_9\text{Na}$ , 626.2366; found 626.2369.

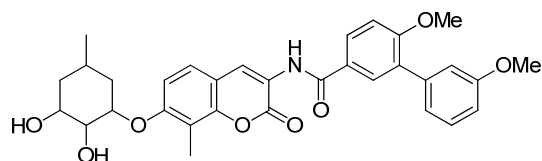

**N-(7-((1R,2R,3R)-2,3-dihydroxy-5-methylcyclohexyloxy)-8-methyl-2-oxo-2H-chromen-3-yl)-3',6-dimethoxybiphenyl-3-carboxamide (44a).** Compound **44a** was obtained as a white amorphous solid (21 mg, 79%).  $^1\text{H}$  NMR (400 MHz,  $\text{CDCl}_3$ )  $\delta$  8.78 (s, 1H), 8.70 (s, 1H), 7.93–7.89 (m, 2H), 7.37 (t,  $J = 8.0$  Hz, 1H), 7.32 (d,  $J = 8.0$ , 1H), 7.14–7.06 (m, 3H), 6.95–6.93 (m, 2H), 4.77–4.76 (m, 1H), 4.10–4.05 (m, 2H), 3.90 (s, 3H), 3.86 (s, 3H), 2.69 (bs, 1H), 2.29 (s, 3H), 2.11 (bs, 1H), 1.93–1.86 (m, 1H), 1.85–1.71 (m, 2H), 1.56–1.51 (m, 1H), 1.45–1.38 (m, 1H), 0.96 (d, 3H).  $^{13}\text{C}$  NMR (100 MHz,  $\text{CDCl}_3$ )  $\delta$  165.7, 160.0, 159.7, 159.5, 156.8, 149.6, 138.8, 131.2, 130.2, 129.4, 128.4, 126.2, 125.9, 124.5, 122.2, 121.8, 115.5, 115.0, 113.6, 113.3, 111.2, 109.9, 76.2, 69.5, 69.0, 56.1, 55.5, 36.7, 32.4, 25.5, 21.9, 8.6. IR (film)  $\nu_{\text{max}}$  3471, 3407, 2950, 2927, 2869, 1713, 1681, 1605, 1526, 1495, 1404, 1371, 1353, 1259, 1076  $\text{cm}^{-1}$ . HRMS (ESI $^+$ )  $m/z$ :  $[\text{M} + \text{Na}^+]$  calcd for  $\text{C}_{32}\text{H}_{33}\text{NO}_8\text{Na}$ , 582.2104; found 582.2097.

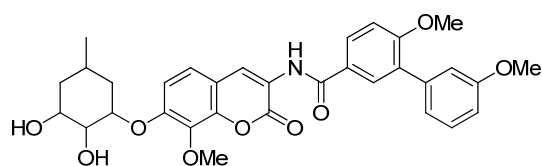

**N-(7-(2,3-dihydroxy-5-methylcyclohexyloxy)-8-methoxy-2-oxo-2H-chromen-3-yl)-3',6-dimethoxybiphenyl-3-carboxamide (44b).** Compound **44b** was obtained as a white amorphorous solid (28 mg, 68%).  $^1\text{H}$  NMR (500 MHz,  $\text{CDCl}_3$ )  $\delta$  8.72 (s, 1H), 8.64 (s, 1H), 7.85–7.81 (m, 2H), 7.29 (t,  $J = 7.9$  Hz, 1H), 7.30 (d,  $J = 8.8$  Hz, 1H), 7.06–6.99 (m, 3H), 6.90–6.87 (m, 2H), 4.66–4.64 (m, 1H), 4.09–4.04 (m, 1H), 4.00–3.98 (m, 1H), 3.90 (s, 3H), 3.83 (s, 3H), 3.79 (s, 3H), 2.47 (bs, 1H), 1.89 (m, 1H), 1.77–1.67 (m, 2H), 1.51–1.54 (m, 1H), 1.39–1.31 (m, 1H), 0.92–0.90 (d, 3H).  $^{13}\text{C}$  NMR (125 MHz,  $\text{CDCl}_3$ )  $\delta$  165.6, 159.8, 159.3, 158.9, 151.86, 144.3, 138.6, 137.4, 131.1, 130.0, 129.2, 128.2, 125.9, 123.8, 122.6, 122.3, 122.0, 115.3, 114.9, 113.1, 112.8, 111.0, 77.6, 69.5, 68.7, 61.6, 55.9, 55.3, 36.4, 32.5, 25.3, 21.7. IR (film)  $\nu_{\text{max}}$  3462, 3404, 2930, 2868, 1713, 1670, 1605, 1576, 1524, 1502, 1462, 1367, 1277, 1246, 1207, 1180, 1049, 1024  $\text{cm}^{-1}$ . HRMS (ESI $^+$ )  $m/z$ :  $[\text{M} + \text{Na}^+]$  calcd for  $\text{C}_{32}\text{H}_{33}\text{NO}_9\text{Na}$ , 598.2053; found 598.2053.

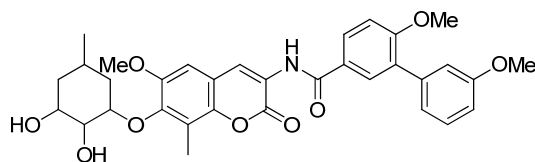

**N-(7-(2,3-dihydroxy-5-methylcyclohexyloxy)-6-methoxy-8-methyl-2-oxo-2H-chromen-3-yl)-3',6-dimethoxybiphenyl-3-carboxamide (44c).** Compound **44c** was obtained as a white amorphorous solid (42 mg, 93%).  $^1\text{H}$  NMR (500 MHz,  $\text{CDCl}_3$ )  $\delta$  8.80 (s, 1H), 8.76 (s, 1H), 7.94–7.90 (m, 2H), 7.38 (t,  $J = 7.9$  Hz, 1H), 7.14–7.09 (m, 3H), 6.95–6.93 (m, 1H), 6.86 (s, 1H), 4.48–4.45 (m, 1H), 4.24–4.22 (m, 1H), 4.06–4.05 (m, 1H), 3.91 (s, 3H), 3.90 (s, 3H), 3.87 (s, 3H), 2.56 (bs, 1H), 2.07–2.05 (m, 1H), 1.99 (bs, 1H), 1.83–1.75 (m, 2H), 1.52–1.44 (m, 2H), 1.02–1.01 (d, 3H).  $^{13}\text{C}$  NMR (125 MHz,  $\text{CDCl}_3$ )  $\delta$  165.8, 160.0, 159.6, 159.5, 150.1, 147.7, 143.6, 138.8, 131.3, 130.2, 129.4, 128.4, 1126.2, 123.9, 123.2, 122.2, 120.3, 115.5, 115.4, 113.3, 111.2, 106.7, 82.1, 71.0, 69.2, 56.2, 56.1, 55.5, 36.6, 34.2, 26.0, 22.0, 9.9. IR (film)  $\nu_{\text{max}}$  3512, 3404,

2957, 2930, 2860, 1716, 1670, 1602, 1580, 1523, 1464, 1383, 1277, 1246, 1207, 1074  $\text{cm}^{-1}$ .

HRMS (ESI<sup>+</sup>) m/z: [M + Na<sup>+</sup>] calcd for C<sub>33</sub>H<sub>35</sub>NO<sub>9</sub>Na, 612.2210; found 612.2192.

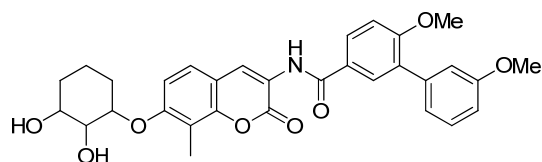

**N-(7-((1R,2R,3R)-2,3-dihydroxycyclohexyloxy)-8-methyl-2-oxo-2H-chromen-3-yl)-3',6-dimethoxybiphenyl-3-carboxamide (45a).** Compound **45a** as a colorless amorphous solid (41 mg, 85%). <sup>1</sup>H NMR (400 MHz, CDCl<sub>3</sub>)  $\delta$  8.78 (s, 1H), 8.72 (s, 1H), 7.95–7.91 (m, 2H), 7.41–7.32 (m, 2H), 7.16–7.08 (m, 3H), 6.98–6.94 (m, 2H), 4.65–4.55 (m, 1H), 4.23–4.22 (m, 1H), 3.92 (s, 3H), 3.86 (s, 3H), 3.85 (m, 1H), 2.34 (s, 3H), 2.11–2.08 (m, 1H), 1.95–1.90 (m, 1H), 1.63–1.50 (m, 3H), 1.45–1.42 (m, 1H). <sup>13</sup>C NMR (100 MHz, CDCl<sub>3</sub>)  $\delta$  165.7, 160.0, 159.7, 159.6, 157.4, 149.5, 138.8, 131.3, 130.2, 129.4, 128.4, 126.3, 125.8, 124.4, 122.2, 122.0, 115.5 (2C), 114.0, 113.4, 111.24, 111.15, 78.5, 74.5, 69.7, 56.1, 55.5, 29.9, 28.6, 18.4, 8.6. IR (film)  $\nu_{\text{max}}$  3484, 3405, 2949, 2843, 1707, 1639, 1601, 1547, 1531, 1454, 1377, 1274, 1265, 1051, 1014  $\text{cm}^{-1}$ . HRMS (ESI<sup>+</sup>) m/z: [M + H<sup>+</sup>] calcd for C<sub>31</sub>H<sub>32</sub>NO<sub>8</sub>, 546.2128; found 546.2127.

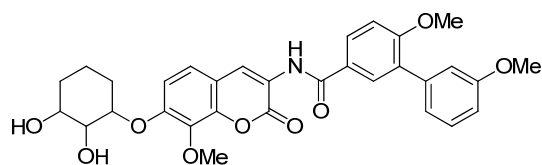

**N-(7-(2,3-dihydroxycyclohexyloxy)-8-methoxy-2-oxo-2H-chromen-3-yl)-3',6-dimethoxybiphenyl-3-carboxamide (45b).** Compound **45b** was obtained as a white amorphous solid (41 mg, 87%). <sup>1</sup>H NMR (500 MHz, CDCl<sub>3</sub>)  $\delta$  8.72 (s, 1H), 8.64 (s, 1H), 7.85–7.81 (m, 2H), 7.29 (t, *J* = 8.0 Hz, 1H), 7.14 (d, *J* = 8.0 Hz, 1H), 7.06–6.99 (m, 3H), 6.94 (d, *J* = 8.0 Hz, 1H), 6.87–6.86 (m, 1H), 4.32 (m, 1H), 4.14 (m, 1H), 3.96 (s, 3H), 3.83 (s, 3H), 3.79 (s, 3H), 3.73–3.71 (m, 1H), 3.35 (bs, 1H), 2.41 (bs, 1H), 2.10 (m, 1H), 1.85 (m, 1H), 1.67 (m, 1H),

1.56 (m, 1H), 1.50–1.40 (m, 2H).  $^{13}\text{C}$  NMR (125 MHz,  $\text{CDCl}_3$ )  $\delta$  165.6, 159.9, 159.3, 158.7, 152.7, 144.0, 138.5, 137.8, 131.1, 130.0, 129.2, 128.2, 125.9, 123.7, 122.7, 122.5, 122.0, 115.6, 115.3, 114.9, 113.1, 111.0, 81.5, 74.8, 69.6, 61.9, 55.9, 55.8, 55.3, 29.6, 18.3. IR (film)  $\nu_{\text{max}}$  3458, 3407, 2930, 2858, 1709, 1668, 1603, 1524, 1501, 1367, 1267, 1244, 1101, 1076, 1018  $\text{cm}^{-1}$ . HRMS (ESI $^+$ )  $m/z$ :  $[\text{M} + \text{Na}^+]$  calcd for  $\text{C}_{31}\text{H}_{31}\text{NO}_9\text{Na}$ , 584.1897; found 584.1904.

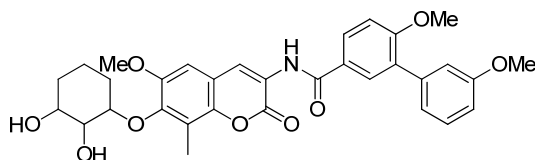

**N-(7-(2,3-dihydroxycyclohexyloxy)-6-methoxy-8-methyl-2-oxo-2H-chromen-3-yl)-3',6-dimethoxybiphenyl-3-carboxamide (45c).** Compound **45c** was obtained as a white amorphous solid (39 mg, 78%).  $^1\text{H}$  NMR (500 MHz,  $\text{CDCl}_3$ )  $\delta$  8.70 (s, 1H), 8.67 (s, 1H), 7.84–7.81 (m, 2H), 7.29 (t,  $J=7.9$  Hz, 1H), 7.06–7.01 (m, 2H), 6.99 (d,  $J=8.5$  Hz, 1H), 6.84–6.84 (m, 1H), 6.77 (s, 1H), 4.14–4.12 (m, 1H), 4.12–4.10 (m, 1H) 3.96 (bs, 1H), 3.85 (s, 3H), 3.82 (s, 3H), 3.78 (s, 3H), 3.73–3.71 (dd,  $J=8.9, 2.9$  Hz, 1H), 2.63 (bs, 1H), 2.30 (s, 3H), 1.88–1.83 (m, 2H), 1.55–1.39 (m, 4H).  $^{13}\text{C}$  NMR (125 MHz,  $\text{CDCl}_3$ )  $\delta$  165.6, 159.8, 159.3, 159.2, 149.4, 146.7, 143.4, 138.6, 131.0, 130.0, 129.2, 128.2, 125.9, 123.4, 123.2, 122.0, 121.1, 115.5, 115.3, 113.1, 111.0, 106.3, 83.7, 75.6, 69.4, 56.0, 55.9, 55.3, 30.5, 29.4, 18.4, 9.9. IR (film)  $\nu_{\text{max}}$  3463, 3408, 2937, 2860, 1717, 1672, 1601, 1524, 1502, 1383, 1339, 1236, 1205, 1182, 1051  $\text{cm}^{-1}$ . HRMS (ESI $^+$ )  $m/z$ :  $[\text{M} + \text{Na}^+]$  calcd for  $\text{C}_{32}\text{H}_{33}\text{NO}_9\text{Na}$ , 598.2053; found 598.2054.

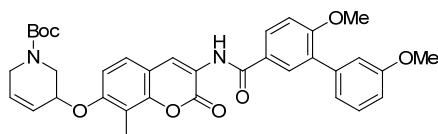

**Tert-butyl 5-(3-(3',6-dimethoxybiphenyl-3-ylcarboxamido)-8-methyl-2-oxo-2H-chromen-7-yloxy)-5,6-dihydropyridine-1(2H)-carboxylate (47a).** Compound **47a** was obtained as a light



yellow amorphous solid (1.57 g, 79%).  $^1\text{H}$  NMR (400 MHz,  $\text{CDCl}_3$ )  $\delta$  8.82 (s, 1H), 8.72 (s, 1H), 7.94–7.90 (m, 2H), 7.40–7.36 (m, 2H), 7.14–6.93 (m, 3H), 6.96–6.94 (m, 2H), 6.02–5.80 (m, 2H), 4.87 (m, 1H), 4.20–3.99 (m, 2H), 3.91 (s, 3H), 3.87 (s, 3H), 3.77–3.42 (m, 2H), 2.32 (s, 3H), 1.49 (s, 3H), 1.41 (s, 6H).  $^{13}\text{C}$  NMR (100 MHz,  $\text{CDCl}_3$ )  $\delta$  165.5, 159.8, 159.5, 159.3, 156.9, 154.6, 149.4, 138.6, 131.0, 130.0, 129.2, 128.8, 128.2, 126.1, 125.6, 125.3, 124.4, 124.2, 122.0, 121.8, 115.2, 113.8, 113.1, 111.0, 110.1, 80.2, 70.0, 69.5, 55.9, 55.3, 44.9, 43.7, 43.0, 28.4, 22.0, 21.8, 8.4. IR (film)  $\nu_{\text{max}}$  3400, 3067, 2976, 2935, 2837, 1705, 1670, 1605, 1526, 1500, 1367, 1244, 1205, 1180, 1103, 1024  $\text{cm}^{-1}$ . HRMS (ESI $^+$ )  $m/z$ :  $[\text{M} + \text{H}^+]$  calcd for  $\text{C}_{35}\text{H}_{37}\text{N}_2\text{O}_8$ , 613.2550; found, 613.2533.

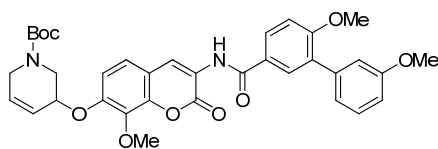

**Tert-Butyl 5-(3-(3',6-dimethoxybiphenyl-3-ylcarboxamido)-8-methoxy-2-oxo-2H-chromen-7-yloxy)-5,6-dihydropyridine-1(2H)-carboxylate (47b).** Compound **47b** was obtained as a light yellow amorphous solid (236 mg, 74%).  $^1\text{H}$  NMR (400 MHz,  $\text{CDCl}_3$ )  $\delta$  8.81 (s, 1H), 8.70 (s, 1H), 7.93–7.89 (m, 2H), 7.37 (t,  $J = 8.0$  Hz, 1H), 7.23 (d,  $J = 8.4$  Hz, 1H), 7.14–7.07 (m, 3H), 6.95–6.93 (m, 1H), 6.03–5.98 (m, 2H), 4.89 (m, 1H), 4.11–4.01 (m, 1H), 3.99 (s, 3H), 3.98–3.95 (m, 1H), 3.91 (s, 3H), 3.87 (s, 3H), 3.84–3.72 (m, 2H), 1.48–1.46 (m, 9H).  $^{13}\text{C}$  NMR (100 MHz,  $\text{CDCl}_3$ )  $\delta$  165.6, 159.8, 159.3, 158.8, 154.6, 151.8, 144.2, 138.6, 137.7, 131.1, 130.0, 129.2, 129.0, 128.2, 126.0, 125.0, 124.3, 123.8, 122.4, 122.0, 115.2, 113.7, 113.4, 113.1, 111.0, 80.3, 70.9, 70.0, 61.5, 55.9, 55.3, 43.6, 28.4. IR (KBr)  $\nu_{\text{max}}$  3425, 3070, 2959, 2930, 2872, 2860, 1728, 1693, 1680, 1600, 1462, 1381, 1273, 1122, 1072  $\text{cm}^{-1}$ . HRMS (ESI $^+$ )  $m/z$ :  $[\text{M} + \text{Na}^+]$  calcd for  $\text{C}_{35}\text{H}_{36}\text{N}_2\text{O}_9\text{Na}$ , 651.2318; found, 651.2321.

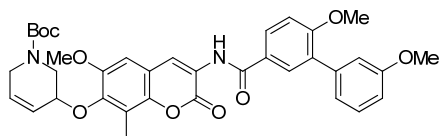

**Tert-butyl 5-(3-(3',6-dimethoxybiphenyl-3-ylcarboxamido)-6-methoxy-8-methyl-2-oxo-2H-chromen-7-yloxy)-5,6-dihydropyridine-1(2H)-carboxylate (47c).** Compound **47c** was obtained as a light yellow amorphous solid (154 mg, 69%).  $^1\text{H}$  NMR (400 MHz,  $\text{CDCl}_3$ )  $\delta$  8.80 (s, 1H), 8.76 (s, 1H), 7.94–7.90 (m, 2H), 7.37 (t,  $J = 8.0$  Hz, 1H), 7.13 (d,  $J = 7.6$  Hz, 1H), 7.10–7.07 (m, 2H), 6.94 (dd,  $J = 8.2, 2.4$  Hz, 1H), 6.86 (s, 1H), 5.95–5.83 (m 2H), 4.85 (m, 1H), 4.06–3.96 (m, 1H), 3.92 (s, 3H), 3.92 (s, 3H), 3.87 (s, 3H), 2.36 (s, 3H), 1.47 (s, 9H).  $^{13}\text{C}$  NMR (100 MHz,  $\text{CDCl}_3$ )  $\delta$  165.6, 159.8, 159.3 (2C), 154.9, 150.1, 146.7, 143.4, 138.6, 131.0, 130.0, 129.2, 128.2, 127.4, 126.0, 125.1, 123.6, 123.0, 122.0, 120.8, 115.3, 113.1, 111.0, 106.4, 80.1, 73.4, 56.0, 55.9, 55.3, 28.4, 21.7, 9.4. IR (KBr)  $\nu_{\text{max}}$  3398, 3090, 3074, 2964, 2931, 2849, 2837, 1701, 1676, 1664, 1603, 1521, 1483, 1413, 1242, 1170  $\text{cm}^{-1}$ . HRMS (ESI $^+$ )  $m/z$ :  $[\text{M} + \text{Na}^+]$  calcd for  $\text{C}_{36}\text{H}_{38}\text{N}_2\text{O}_9\text{Na}$ , 665.2475; found, 665.2468.

#### Representative procedure for Boc deprotection:

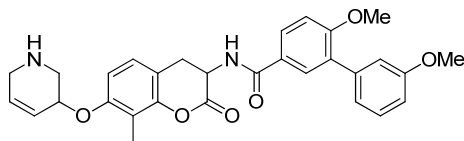

**3',6-dimethoxy-N-(8-methyl-2-oxo-7-(1,2,3,6-tetrahydropyridin-3-yloxy)-2H-chromen-3-yl)biphenyl-3-carboxamide (48a):** A solution of compound **48a** (470 mg, 0.78 mmol) in methylene chloride (20 mL) was treated with TFA (2 mL). The solution was stirred at rt overnight and concentrated to dryness, then the residue was purified via column chromatography ( $\text{SiO}_2$ , 10:1,  $\text{CH}_2\text{Cl}_2$ :MeOH) to afford compound **48a** as a white amorphous solid (349 mg, 88%).  $^1\text{H}$  NMR (400 MHz,  $\text{CDCl}_3$ )  $\delta$  8.77 (s, 1H), 8.72 (s, 1H), 7.92–7.90 (m, 2H), 7.38–7.29

(m, 2H), 7.14–7.04 (m, 3H), 6.94–6.88 (m, 2H), 6.10–5.99 (m, 2H), 4.70 (m, 1H), 3.88 (s, 3H), 3.86 (s, 3H), 3.46–3.31 (m, 2H), 2.32 (m, 2H), 2.32 (s, 3H).  $^{13}\text{C}$  NMR (100 MHz,  $\text{CDCl}_3$ )  $\delta$  165.4, 159.7, 159.4, 159.3, 157.2, 149.4, 138.6, 133.3, 130.9, 130.0, 129.2, 128.2, 126.1, 125.6, 124.4, 124.2, 122.0, 121.7, 115.3, 115.1, 113.6, 113.1, 111.0, 110.5, 69.4, 55.9, 55.3, 47.7, 44.8, 8.5. IR (film)  $\nu_{\text{max}}$  3400, 3083, 3008, 2968, 2837, 1703, 1668, 1601, 1523, 1504, 1367, 1201, 1132, 1105  $\text{cm}^{-1}$ . HRMS (ESI $^+$ )  $m/z$ :  $[\text{M} + \text{H}^+]$  calcd for  $\text{C}_{30}\text{H}_{29}\text{N}_2\text{O}_6$ , 513.2026; found, 513.2024.

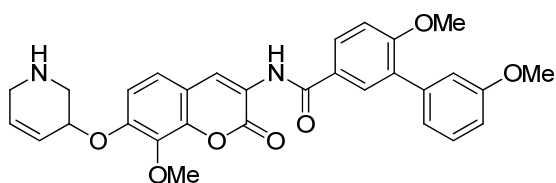

**3',6-dimethoxy-N-(8-methoxy-2-oxo-7-(1,2,3,6-tetrahydropyridin-3-yloxy)-2H-chromen-3-yl)biphenyl-3-carboxamide (48b).** Compound **48b** was obtained as a white amorphous solid (61 mg, 81%).  $^1\text{H}$  NMR (500 MHz,  $\text{CDCl}_3$ )  $\delta$  8.81 (s, 1H), 8.73 (s, 1H), 7.94–7.91 (m, 2H), 7.38 (t,  $J = 7.9$  Hz, 1H), 7.22 (d,  $J = 8.7$  Hz, 1H), 7.14–7.07 (m, 3H), 6.98 (d,  $J = 8.7$  Hz, 1H), 6.94 (dd,  $J = 8.3, 2.1$  Hz, 1H), 6.14–6.04 (m, 2H), 5.06 (m, 1H), 4.01 (s, 3H), 3.88 (s, 3H), 3.84 (s, 3H), 3.84–3.72 (m, 2H), 3.60 (m, 1H), 3.48 (m, 1H).  $^{13}\text{C}$  NMR (125 MHz,  $\text{CDCl}_3$ )  $\delta$  165.5, 159.9, 159.3, 158.4, 150.6, 144.0, 138.6, 138.3, 131.0, 130.0, 129.2, 128.2, 126.0, 125.8, 124.9, 123.3, 122.9, 122.7, 122.0, 116.5, 115.5, 115.3, 113.1, 111.0, 68.3, 61.9, 55.9, 55.2, 44.7, 41.7. IR (KBr)  $\nu_{\text{max}}$  3404, 2956, 2849, 1677, 1608, 1527, 1458, 1439, 1369, 1205, 1140  $\text{cm}^{-1}$ . HRMS (ESI $^+$ )  $m/z$ :  $[\text{M} + \text{H}^+]$  calcd for  $\text{C}_{30}\text{H}_{29}\text{N}_2\text{O}_7$ , 529.1975; found, 529.1979.

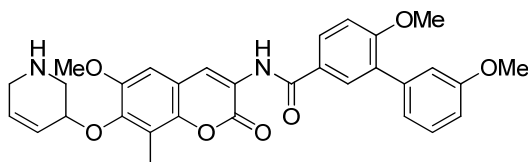

**3',6-dimethoxy-N-(6-methoxy-8-methyl-2-oxo-7-(1,2,3,6-tetrahydropyridin-3-yloxy)-2H-chromen-3-yl)biphenyl-3-carboxamide (48c).** Compound **48c** was obtained as a light brown amorphorous solid (371 mg, 79%).  $^1\text{H}$  NMR (400 MHz,  $\text{DMSO-}d_6$ ) 9.64 (s, 1H), 9.06 (s, 1H), 8.00–7.92 (m, 2H), 7.39–7.33 (m, 2H), 7.24 (d,  $J = 8.0$  Hz, 1H), 7.12–7.10 (m, 2H), 6.96 (d,  $J = 8.0$  Hz, 1H), 6.17–6.05 (m, 2H), 4.72 (m, 1H), 3.89 (s, 3H), 3.86 (s, 3H), 3.80 (s, 3H), 3.73–3.69 (m, 2H), 3.45–3.42 (m, 2H), 2.32 (s, 3H).  $^{13}\text{C}$  NMR (100 MHz,  $\text{DMSO-}d_6$ )  $\delta$  165.6, 159.6, 159.4, 158.5, 149.7, 146.5, 143.8, 139.1, 130.5, 129.9, 129.6 (2C), 127.8, 126.1, 126.0, 125.5, 123.5, 122.2, 119.8, 115.8, 115.7, 113.0, 112.0, 108.0, 71.2, 56.6, 56.3, 55.6, 45.0, 41.7, 9.8. IR (KBr)  $\nu_{\text{max}}$  3418, 3004, 2984, 2841, 1685, 1664, 1604, 1529, 1433, 1381, 1242, 1138  $\text{cm}^{-1}$ . HRMS (ESI $^+$ )  $m/z$ :  $[\text{M} + \text{H}^+]$  calcd for  $\text{C}_{31}\text{H}_{31}\text{N}_2\text{O}_7$ , 543.2131; found, 543.2130.

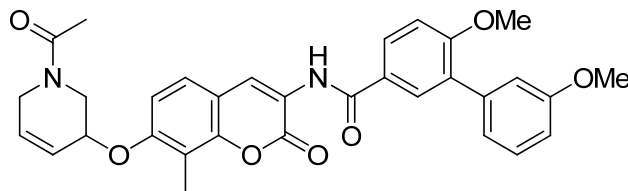

**N-(7-(1-acetyl-1,2,3,6-tetrahydropyridin-3-yloxy)-8-methyl-2-oxo-2H-chromen-3-yl)-3',6-dimethoxybiphenyl-3-carboxamide (50a).** A solution of compound **48a** (45 mg, 0.088 mmol) in pyridine (3 mL) was treated with acetic anhydride (1 mL) and stirred at rt for 2 h. After 2 h, the solvent was removed and the residue purified via column chromatography ( $\text{SiO}_2$ , 4:1,  $\text{CH}_2\text{Cl}_2$ :acetone) to afford compound **50a** as a white amorphorous solid (43 mg, 88%).  $^1\text{H}$  NMR (400 MHz,  $\text{CDCl}_3$ )  $\delta$  8.81 (s, 1H), 8.72 (s, 1H), 7.94–7.91 (m, 2H), 7.39–7.29 (m, 2H), 7.15–7.08 (m, 3H), 7.00–6.92 (m, 2H), 6.12–5.96 (m, 2H), 4.91–4.89 (m, 1H), 4.51–4.34 (m, 1H), 4.09–4.03 (m, 1H), 3.93–3.90 (m, 1H), 3.91 (s, 3H), 3.87 (s, 3H), 3.76–3.51 (m, 1H), 2.30 (3H), 2.17 (3H).  $^{13}\text{C}$  NMR (100 MHz,  $\text{CDCl}_3$ )  $\delta$  170.0, 165.69, 165.65, 160.00, 159.95, 159.6, 159.5, 157.0, 156.6, 149.6, 149.5, 138.79, 138.77, 131.22, 131.19, 130.9, 130.1, 129.3, 128.3, 127.5, 126.8,

126.3, 126.2, 125.89, 125.85, 124.4, 124.1, 123.6, 122.2, 122.1, 115.6, 115.5, 115.46, 115.41, 114.21, 114.17, 113.33, 113.30, 111.2, 111.0, 110.2, 70.1, 69.6, 56.1, 55.5, 47.9, 45.7, 42.5, 41.9, 21.9, 21.4, 8.54, 8.51. IR (film)  $\nu_{max}$  3409, 3049, 2933, 2839, 1712, 1686, 1628, 1605, 1526, 1433, 1373, 1246, 1136, 1097, 1022  $\text{cm}^{-1}$ . HRMS (ESI<sup>+</sup>) m/z: [M + Na<sup>+</sup>] calcd for C<sub>32</sub>H<sub>30</sub>N<sub>2</sub>O<sub>7</sub>Na, 577.1950; found, 577.1947.

### Representative procedure for synthesis of compounds 51a–c.

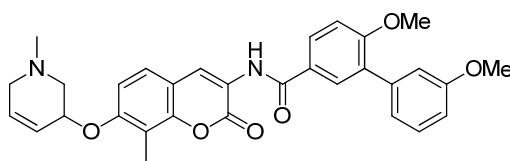

**3',6-dimethoxy-N-(8-methyl-7-(1-methyl-1,2,3,6-tetrahydropyridin-3-yloxy)-2-oxo-2H-chromen-3-yl)biphenyl-3-carboxamide (51a).** A solution of compound **49a** (249 mg, 0.49 mmol) in THF (3 mL) was treated with potassium carbonate (132 mg, 0.97 mmol) at 0°C, followed by methyl iodide (30  $\mu\text{L}$ , 0.49 mmol). The reaction was quenched with saturated ammonium chloride solution, and extracted with methylene chloride (2 x 30 mL). The combined organic layers were dried over magnesium sulfate, concentrated to dryness and purified via column chromatography (SiO<sub>2</sub>, 10:1, CH<sub>2</sub>Cl<sub>2</sub>:MeOH) to afford compound **51a** as a light brown amorphous solid (84 mg, 33%). <sup>1</sup>H NMR (400 MHz, CDCl<sub>3</sub>)  $\delta$  8.82 (s, 1H), 8.73 (s, 1H), 7.95–7.92 (m, 2H), 7.41–7.35 (m, 2H), 7.16–7.08 (m, 3H), 6.95 (m, 2H), 6.04–5.94 (m, 2H), 4.99 (m, 1H), 3.92 (s, 3H), 3.88 (s, 3H), 3.09–2.98 (m, 3H), 2.67–2.63 (m, 1H), 2.44 (s, 3H), 2.36 (s, 3H). <sup>13</sup>C NMR (100 MHz, CDCl<sub>3</sub>)  $\delta$  165.6, 159.9, 159.7, 159.5, 157.6, 149.6, 138.8, 131.2, 130.2, 130.1, 129.3, 128.3, 126.2, 125.8, 124.5, 124.4, 122.2, 121.9, 115.6, 115.4, 113.8, 113.3, 111.2, 110.9, 72.3, 56.8, 56.0, 55.5, 54.4, 45.8, 8.6. IR (film)  $\nu_{max}$  3404, 3090, 3049, 2935, 2839, 1697,

1662, 1634, 1606, 1524, 1500, 1369, 1236, 1097, 1018  $\text{cm}^{-1}$ . HRMS (ESI<sup>+</sup>)  $m/z$ :  $[\text{M} + \text{H}^+]$  calcd for  $\text{C}_{31}\text{H}_{31}\text{N}_2\text{O}_6$ , 527.2182; found, 527.2178.

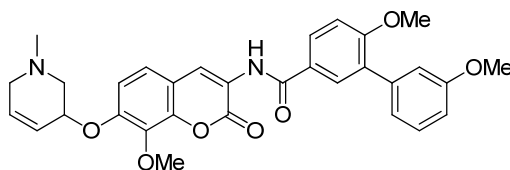

**3',6-dimethoxy-N-(8-methoxy-7-(1-methyl-1,2,3,6-tetrahydropyridin-3-yloxy)-2-oxo-2H-chromen-3-yl)biphenyl-3-carboxamide (51b).** Compound **51b** was obtained a light brown amorphous solid (68 mg, 30%). <sup>1</sup>H NMR (500 MHz, MeOD)  $\delta$  8.58 (s, 1H), 7.90 (d,  $J = 8.2$  Hz, 1H), 7.83 (s, 1H), 7.32–7.28 (m, 2H), 7.16–7.14 (m, 2H), 7.07–7.05 (m, 2H), 6.90 (m, 1H), 6.26–6.13 (m, 2H), 5.14 (m, 1H), 3.97 (s, 3H), 3.95–3.93 (m, 1H), 3.87 (s, 3H), 3.82 (s, 3H), 3.80–3.73 (m, 2H), 3.61–3.58 (m, 1H), 3.02 (s, 3H). <sup>13</sup>C NMR (100 MHz,  $\text{CDCl}_3$ )  $\delta$  165.5, 159.8, 159.3, 158.8, 152.2, 144.2, 138.6, 137.8, 131.0, 130.1, 130.0, 129.2, 128.2, 125.9, 124.2, 123.8, 122.4, 122.3, 122.0, 115.3, 115.1, 113.8, 113.1, 111.0, 72.9, 61.5, 56.4, 55.9, 55.3, 54.1, 45.5. IR (KBr)  $\nu_{\text{max}}$  3404, 2954, 2845, 1689, 1643, 1607, 1573, 1529, 1502, 1277, 1205, 1140, 1099, 1022  $\text{cm}^{-1}$ . HRMS (ESI<sup>+</sup>)  $m/z$ :  $[\text{M} + \text{H}^+]$  calcd for  $\text{C}_{31}\text{H}_{31}\text{N}_2\text{O}_7$ , 543.2131; found 543.2126.

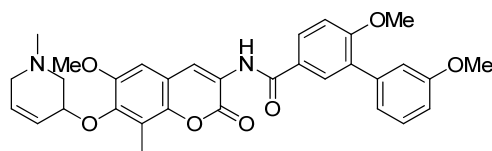

**3',6-dimethoxy-N-(6-methoxy-8-methyl-7-(1-methyl-1,2,3,6-tetrahydropyridin-3-yloxy)-2-oxo-2H-chromen-3-yl)biphenyl-3-carboxamide (51c).** Compound **51c** was obtained a light brown amorphous solid (59 mg, 21%). <sup>1</sup>H NMR (400 MHz,  $\text{CDCl}_3$ )  $\delta$  8.82 (s, 1H), 8.78 (s, 1H), 7.96–7.92 (m, 2H), 7.39 (t,  $J = 8.0$  Hz, 1H), 7.16–7.08 (m, 3H), 6.95 (dd,  $J = 8.0, 2.3$  Hz, 2H), 6.87 (s, 1H), 6.00–5.97 (m, 2H), 4.78 (m, 1H), 3.92 (s, 3H), 3.92 (s, 3H), 3.88 (s, 3H), 3.09 (d,  $J = 7.0$  Hz, 1H), 2.92 (d,  $J = 7.0$  Hz, 1H), 2.77–2.70 (m, 2H), 2.44 (s, 3H), 2.41 (s, 3H). <sup>13</sup>C NMR

(100 MHz, CDCl<sub>3</sub>)  $\delta$  165.6, 159.8, 159.4, 159.3, 150.3, 147.5, 143.5, 138.6, 131.1, 130.0, 129.7, 129.2, 128.2, 126.0, 125.3, 123.8, 123.0, 122.0, 121.0, 115.3 (2C), 113.1, 111.0, 106.4, 76.0, 57.1, 56.0, 55.9, 55.3, 54.4, 45.8, 9.6. IR (KBr)  $\nu_{max}$  3403, 3112, 3072, 2954, 2929, 2854, 1716, 1649, 1605, 1502, 1458, 1366, 1248, 1207, 1180, 1086 cm<sup>-1</sup>. HRMS (ESI<sup>+</sup>) m/z: [M + H<sup>+</sup>] calcd for C<sub>32</sub>H<sub>33</sub>N<sub>2</sub>O<sub>7</sub>, 557.2288; found, 527.2300.

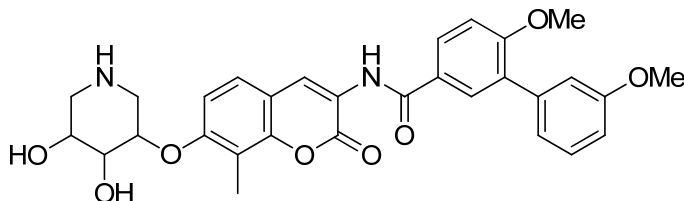

**N-(7-(4,5-dihydroxypiperidin-3-yloxy)-8-methyl-2-oxochromen-3-yl)-3',6-dimethoxybiphenyl-3-carboxamide (52a).** Compound **52a** was obtained as a colorless amorphous solid (32 mg, 53%). <sup>1</sup>H NMR (400 MHz, DMSO-*d*<sub>6</sub>)  $\delta$  9.66 (s, 1H), 8.48 (s, 1H), 8.01 (dd, *J* = 8.6, 2.3 Hz, 1H), 7.93 (d, *J* = 2.3, 1H), 7.56 (d, *J* = 8.7 Hz, 1H), 7.37 (t, *J* = 7.8 Hz, 1H), 7.26 (d, *J* = 8.8 Hz, 1H), 7.18 (d, *J* = 8.8, 1H), 7.13–7.10 (m, 2H), 6.97–6.95 (m, 1H), 4.96 (d, *J* = 5.2, 1H), 4.61 (d, *J* = 4.2, 1H), 4.45–4.41 (m, 1H), 3.87 (s, 3H), 3.81 (s, 3H), 3.73 (bs, 1H), 3.68 (bs, 1H), 3.08–3.04 (m, 1H), 2.76–2.72 (m, 1H), 2.60–2.57 (m, 1H), 2.48–2.44 (m, 1H), 2.24 (s, 3H). <sup>13</sup>C NMR (100 MHz, DMSO-*d*<sub>6</sub>)  $\delta$  165.6, 159.6, 159.4, 158.8, 158.6, 150.1, 139.2, 130.4, 129.92, 129.85, 129.7, 129.6, 126.5, 126.3, 122.2, 121.5, 115.7, 113.9, 113.1, 113.0, 112.0, 111.3, 77.9, 72.1, 69.2, 56.4, 55.6, 49.5, 47.1, 8.6. IR (film)  $\nu_{max}$  3317 (broad), 2950, 2918, 2849, 1705, 1674, 1607, 1541, 1533, 1375, 1253, 1204, 1136, 1103 cm<sup>-1</sup>. HRMS (ESI<sup>+</sup>) m/z: [M + H<sup>+</sup>] calcd for C<sub>30</sub>H<sub>31</sub>N<sub>2</sub>O<sub>8</sub>, 547.2080; found, 547.2083.

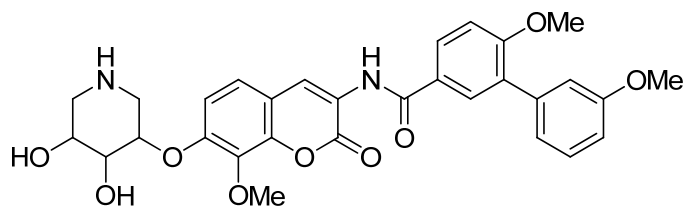

**N-(7-(4,5-dihydroxypiperidin-3-yloxy)-8-methoxy-2-oxo-2H-chromen-3-yl)-3',6-dimethoxybiphenyl-3-carboxamide (52b).** Compound **52b** was obtained as a colorless amorphorous solid (48 mg, 92%).  $^1\text{H}$  NMR (500 MHz,  $\text{DMSO-}d_6$ )  $\delta$  9.68 (s, 1H), 8.48 (s, 1H), 7.99 (dd,  $J = 8.6, 2.4$  Hz, 1H), 7.92 (d,  $J = 2.4$  Hz, 1H), 7.37 (t,  $J = 7.9$  Hz, 1H), 7.23 (t,  $J = 9.0$  Hz, 1H), 7.12–7.09 (m 2H), 6.96–6.94 (m, 1H), 5.02 (s, 1H), 4.76 (s, 1H), 4.48–4.44 (m, 1H), 3.89 (s, 3H), 3.86 (s, 3H), 3.77 (s, 3H), 3.72 (m, 1H), 3.70–3.69 (m, 1H), 3.17–3.09 (m, 2H), 2.81–2.77 (m, 1H), 2.66–2.63 (m, 1H).  $^{13}\text{C}$  NMR (125 MHz,  $\text{DMSO-}d_6$ )  $\delta$  165.2, 159.2, 159.0, 157.9, 153.2, 144.5, 138.7, 136.0, 130.0, 129.4, 129.20, 129.16 (2C), 125.8, 122.8, 121.7, 121.6, 115.3, 113.7, 112.6, 112.5, 111.6, 77.5, 71.6, 68.7, 60.9, 55.9, 55.1, 48.9, 46.5. IR (KBr)  $\nu_{\text{max}}$  3417 (broad), 2947, 2846, 1682, 1645, 1602, 1519, 1434, 1389, 1206, 1141  $\text{cm}^{-1}$ . HRMS ( $\text{ESI}^+$ )  $m/z$ :  $[\text{M} + \text{H}^+]$  calcd for  $\text{C}_{30}\text{H}_{31}\text{N}_2\text{O}_9$ , 563.2030; found, 563.2029.

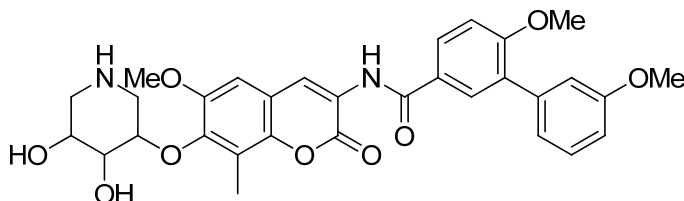

**N-(7-(4,5-dihydroxypiperidin-3-yloxy)-6,8-dimethoxy-2-oxo-2H-chromen-3-yl)-3',6-dimethoxybiphenyl-3-carboxamide (52c).** Compound **52c** was obtained as a colorless amorphorous solid (42 mg, 59%).  $^1\text{H}$  NMR (500 MHz,  $\text{DMSO-}d_6$ )  $\delta$  9.65 (s, 1H), 8.53 (s, 1H), 7.99 (dd,  $J = 8.6, 2.4$  Hz, 1H), 7.92 (d,  $J = 2.4$  Hz, 1H), 7.37 (t,  $J = 7.8$  Hz, 1H), 7.28 (s, 1H), 7.26 (d,  $J = 7.8$  Hz, 1H), 7.12–7.09 (m 2H), 6.96–6.94 (m, 1H), 4.16 (m, 1H), 3.87 (s, 6H), 3.80 (m, 1H), 3.76 (s, 3H), 3.75 (m, 1H), 3.04–3.01 (m, 1H), 2.78–2.74 (m, 1H), 2.70–2.65 (m, 2H), 2.32 (s, 3H).  $^{13}\text{C}$  NMR (125 MHz,  $\text{DMSO-}d_6$ )  $\delta$  165.1, 159.1, 158.9, 158.1, 149.3, 147.4, 143.6, 138.6, 130.0, 129.4, 129.1 (2C), 128.1, 125.7, 122.5, 121.7, 119.0, 115.2, 114.4, 112.5, 111.5, 107.3, 80.7, 71.5, 67.5, 56.1, 55.9, 55.1, 47.8, 45.9, 9.3. IR (KBr)  $\nu_{\text{max}}$  3402 (broad), 2974, 2939,



2835, 1666, 1631, 1604, 1523, 1502, 1462, 1429, 1366, 1267, 1244, 1091, 1022  $\text{cm}^{-1}$ . HRMS (ESI<sup>+</sup>) m/z: [M + H<sup>+</sup>] calcd for C<sub>31</sub>H<sub>33</sub>N<sub>2</sub>O<sub>9</sub>, 577.2186; found, 577.2180.

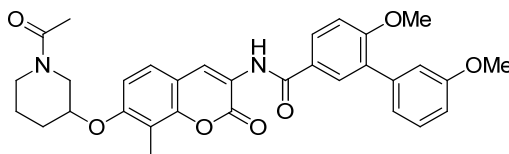

**N-(7-(1-acetylpiperidin-3-yloxy)-8-methyl-2-oxo-2H-chromen-3-yl)-3',6-dimethoxybiphenyl-3-carboxamide (53a).** Palladium on carbon (10%, 5 mg) was added to **50** (36 mg, 0.07 mmol) in anhydrous THF (3 mL) and the solution was placed under an atmosphere of H<sub>2</sub>. After 12 h, the solution was filtered through SiO<sub>2</sub> (40:1, CH<sub>2</sub>Cl<sub>2</sub>:acetone) and the eluent was concentrated to afford **53a** as a colorless amorphous solid (32 mg, 89%). <sup>1</sup>H NMR (400 MHz, CDCl<sub>3</sub>)  $\delta$  8.80 (s, 1H), 8.72 (s, 1H), 7.94-7.90 (m, 2H), 7.40-7.34 (m, 2H), 7.15-7.07 (m, 3H), 6.99-6.86 (m, 2H), 4.60-4.30 (m, 1H), 4.25-3.95 (m, 1H), 3.91 (s, 3H), 3.87 (s, 3H), 3.76-3.39 (m, 3H), 2.32-2.04 (3H), 1.98-1.82 (m, 3H), 1.70-1.50 (m, 1H); <sup>13</sup>C NMR (100 MHz, CDCl<sub>3</sub>)  $\delta$  169.5, 169.4, 165.5 (2C), 159.8, 159.7, 159.5, 159.4, 159.3, 156.7, 156.1, 149.5, 149.4, 138.6 (2C), 131.0, 130.0, 129.2, 128.2, 126.1, 126.0, 125.7, 124.3, 124.0, 122.0, 121.7, 115.4, 115.3, 115.2, 113.8, 113.7, 113.2, 113.1, 111.0, 110.5, 109.8, 72.0, 71.4, 55.9, 55.3, 50.3, 46.6, 45.5, 42.0, 30.0, 28.8, 23.3, 21.5, 21.4, 21.2, 8.3. IR (film)  $\nu_{\text{max}}$  3406, 2934, 2835, 1701, 1666, 1628, 1539, 1369, 1234, 1093, 1022  $\text{cm}^{-1}$ . HRMS (ESI<sup>+</sup>) m/z: [M + H<sup>+</sup>] calcd for C<sub>32</sub>H<sub>32</sub>N<sub>2</sub>O<sub>7</sub>, 557.2288; found 557.2291.

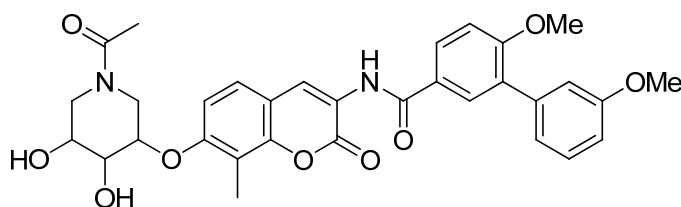

**N-(7-(1-acetyl-4,5-dihydropiperidin-3-yloxy)-8-methyl-2-oxo-2H-chromen-3-yl)-3',6-dimethoxybiphenyl-3-carboxamide (54a).** Compound **54a** was obtained as a white

amorphorous solid (22 mg, 81%).  $^1\text{H}$  NMR (400 MHz,  $\text{CDCl}_3$ )  $\delta$  8.71–8.67 (m, 2H), 7.92–7.87 (M, 2H), 7.37–7.36 (t,  $J=8.0$ , 1H), 7.31–7.25 (m, 1H), 7.25–7.04 (m, 3H), 6.95–6.92 (m, 1H), 4.66–3.97 (m, 4H), 3.90–3.85 (m, 6H), 3.79–2.82 (m, 3H), 2.26–2.01 (m, 6H).  $^{13}\text{C}$  NMR (100 MHz,  $\text{CDCl}_3$ )  $\delta$  171.6, 170.4, 165.7, 160.0, 159.5, 159.3, 157.1, 156.1, 149.4, 149.3, 138.8, 131.2, 130.2, 129.4, 128.4, 126.2, 126.0, 124.4, 123.9, 122.2, 121.9, 115.5, 115.1, 114.9, 114.3, 114.1, 113.3, 111.2, 110.6, 109.6, 74.6, 73.3, 69.5, 68.4, 65.9, 56.1, 55.5, 49.8, 45.9, 43.2, 43.1, 21.6, 21.5, 8.5, 8.4. IR (film)  $\nu_{\text{max}}$  3400, 3365 (broad), 2931, 2839, 1712, 1628, 1607, 1526, 1502, 1369, 1267, 1244, 1105, 1034  $\text{cm}^{-1}$ . HRMS (ESI $^+$ )  $m/z$ :  $[\text{M} + \text{Na}^+]$  calcd for  $\text{C}_{32}\text{H}_{32}\text{N}_2\text{O}_9\text{Na}$ , 611.2005; found, 611.2011.

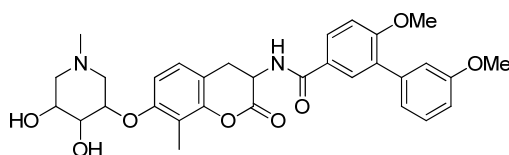

**N-(7-(4,5-dihydroxy-1-methylpiperidin-3-yloxy)-8-methyl-2-oxo-2H-chromen-3-yl)-3',6-dimethoxybiphenyl-3-carboxamide (55a).** Compound **55a** was obtained as light brown amorphorous solid (27 mg, 60%).  $^1\text{H}$  NMR (400 MHz,  $\text{CDCl}_3$ )  $\delta$  8.79 (s, 1H), 8.72 (s, 1H), 7.95–7.92 (m, 2H), 7.41–7.33 (m, 2H), 7.16–7.05 (m, 4H), 6.97–6.95 (m, 1H), 4.61 (m, 1H), 4.10 (m, 1H), 3.92 (s, 3H), 3.88 (s, 3H), 3.78–3.76 (m, 1H), 3.11–2.99 (m, 2H), 2.40 (s, 3H), 2.35 (s, 3H), 2.12–2.08 (m, 2H).  $^{13}\text{C}$  NMR (100 MHz,  $\text{CDCl}_3$ )  $\delta$  165.5, 159.8, 159.4, 159.3, 157.4, 149.3, 138.6, 131.0, 130.0, 129.2, 128.2, 126.0, 125.7, 124.2, 122.0, 121.9, 115.5, 115.3, 114.0, 113.2, 111.2, 111.0, 73.5, 68.6, 59.1, 57.0, 55.9, 55.3, 45.5, 8.4. IR (film)  $\nu_{\text{max}}$  3402, 2927, 2852, 1707, 1653, 1605, 1526, 1502, 1369, 1267, 1242, 1207, 1107  $\text{cm}^{-1}$ . HRMS (ESI $^+$ )  $m/z$ :  $[\text{M} + \text{H}^+]$  calcd for  $\text{C}_{31}\text{H}_{33}\text{N}_2\text{O}_8$ , 561.2237; found, 561.2239.

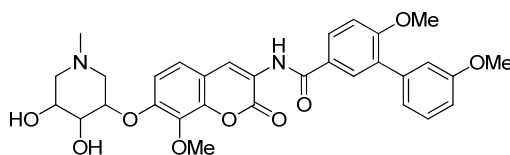

**N-(7-(4,5-dihydroxy-1-methylpiperidin-3-yloxy)-8-methoxy-2-oxo-2H-chromen-3-yl)-3',6-dimethoxybiphenyl-3-carboxamide (55b).** Compound **55b** was obtained as a light brown amorphorous solid (9.8 mg, 39%).  $^1\text{H}$  NMR (500 MHz,  $\text{CDCl}_3$ )  $\delta$  8.82 (s, 1H), 8.74 (s, 1H), 7.95–7.91 (m, 2H), 7.39 (t,  $J = 8.7$  Hz, 1H), 7.24 (d,  $J = 8.7$  Hz, 1H), 7.15–7.08 (m, 3H), 6.96 (dd,  $J = 8.7, 2.2$  Hz, 1H), 4.48 (m, 1H), 4.10 (m, 1H), 4.06 (s, 3H), 3.92 (s, 3H), 3.89 (s, 3H), 3.79–3.78 (m, 1H), 3.16–3.14 (m, 1H), 3.02–2.99 (m, 1H), 2.37 (s, 3H), 2.33 (t,  $J = 12.2$  Hz, 1H), 2.18 (t,  $J = 12.2$  Hz, 1H).  $^{13}\text{C}$  NMR (125 MHz,  $\text{CDCl}_3$ )  $\delta$  165.5, 159.9, 159.4, 158.7, 152.6, 145.2, 144.1, 138.6, 138.0, 131.1, 130.0, 129.2, 128.2, 125.9, 123.6, 122.7, 122.0, 115.9, 115.3, 115.0, 113.2, 111.1, 79.3, 76.1, 68.6, 62.0, 59.0, 57.4, 55.9, 55.3, 45.5. IR (KBr)  $\nu_{\text{max}}$  3410 (broad), 2927, 2870, 2835, 1710, 1664, 1603, 1524, 1502, 1460, 1366, 1275, 1244, 1086  $\text{cm}^{-1}$ . HRMS (ESI $^+$ )  $m/z$ :  $[\text{M} + \text{H}^+]$  calcd for  $\text{C}_{31}\text{H}_{33}\text{N}_2\text{O}_9$ , 577.2186; found, 577.2180.

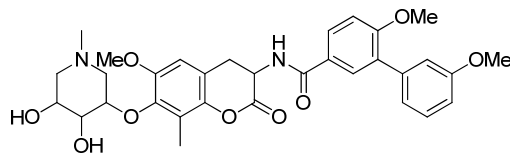

**N-(7-(4,5-dihydroxy-1-methylpiperidin-3-yloxy)-6-methoxy-8-methyl-2-oxo-2H-chromen-3-yl)-3',6-dimethoxybiphenyl-3-carboxamide (55c).** Compound **55c** was obtained as light brown amorphorous solid (38 mg, 61%).  $^1\text{H}$  NMR (400 MHz,  $\text{CDCl}_3$ )  $\delta$  8.81 (s, 1H), 8.78 (s, 1H), 7.95–7.92 (m, 2H), 7.39 (t,  $J = 8.0$  Hz, 1H), 7.16–7.08 (m, 3H), 6.96 (dd,  $J = 8.0, 2.1$  Hz, 1H), 6.89 (s, 1H), 4.40 (m, 1H), 4.08 (m, 1H), 3.95 (s, 3H), 3.92 (s, 3H), 3.88 (s, 3H), 3.79 (m, 1H), 2.97 (m, 2H), 2.41 (s, 3H), 2.33 (s, 3H), 2.25–2.16 (m, 2H).  $^{13}\text{C}$  NMR (100 MHz,  $\text{CDCl}_3$ )  $\delta$  165.6, 159.9, 159.34, 159.25, 149.3, 146.7, 143.4, 138.6, 131.1, 130.0, 129.2, 128.2, 126.0,

123.5, 123.3, 122.0, 120.8, 115.7, 115.3, 113.1, 111.0, 106.4, 80.7, 77.2, 68.4, 58.7, 58.0, 56.1, 55.9, 55.3, 45.7, 9.6. IR (KBr)  $\nu_{max}$  3405 (broad), 2959, 2930, 2854, 1682, 1647, 1605, 1439, 1385, 1207, 1138, 1022  $\text{cm}^{-1}$ . HRMS (ESI<sup>+</sup>)  $m/z$ : [M + H<sup>+</sup>] calcd for C<sub>32</sub>H<sub>35</sub>N<sub>2</sub>O<sub>9</sub>, 591.2342; found, 591.2326.

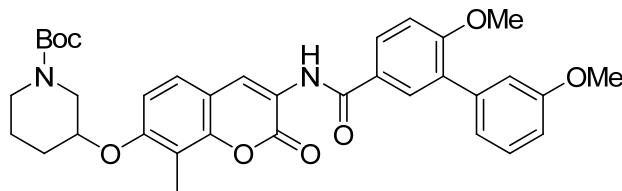

**Tert-butyl 3-(3-(3',6-dimethoxybiphenyl-3-ylcarboxamido)-8-methyl-2-oxo-2H-chromen-7-yloxy)piperidine-1-carboxylate (56a).** Compound **56a** was obtained as a light brown amorphous solid (643 mg, 67%). <sup>1</sup>H NMR (400 MHz, CDCl<sub>3</sub>)  $\delta$  8.82 (s, 1H), 8.69 (s, 1H), 7.95-7.91 (m, 2H) 7.41-7.35 (m, 2H), 7.16-7.08 (m, 3H), 6.97-6.94 (m, 2H), 4.42 (m, 1H), 3.892 (s, 3H), 3.88 (s, 3H), 3.74-3.40 (m, 4H), 2.33 (s, 3H), 2.07-1.92 (m, 3H), 1.62-1.58 (m, 1H), 1.48 (bs, 3H), 1.28 (bs, 6H). <sup>13</sup>C NMR (100 MHz, CDCl<sub>3</sub>)  $\delta$  165.5, 159.8, 159.5, 159.3, 156.8, 154.7, 149.4, 138.6, 131.0, 130.0, 129.2, 128.2, 126.1, 125.6, 124.3, 122.0, 121.7, 115.2, 115.0, 113.6, 113.2, 111.0, 109.9, 79.8, 77.3, 71.5, 55.9, 55.3, 47.3, 29.9, 28.3, 21.7, 8.3. IR (film)  $\nu_{max}$  3403, 2980, 2937, 1707, 1653, 1676, 1605, 1524, 1502, 1464, 1367, 1242, 1178, 1109, 1041  $\text{cm}^{-1}$ . HRMS (ESI<sup>+</sup>)  $m/z$ : [M + Na<sup>+</sup>] calcd for C<sub>35</sub>H<sub>38</sub>N<sub>2</sub>O<sub>8</sub>Na, 637.2526; found, 637.2524.

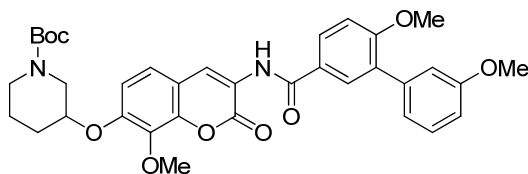

**Tert-butyl 3-(3-(3',6-dimethoxybiphenyl-3-ylcarboxamido)-8-methoxy-2-oxo-2H-chromen-7-yloxy)piperidine-1-carboxylate (56b).** Compound **56b** was obtained as a light

brown amorphorous solid (174 mg, 82%).  $^1\text{H}$  NMR (400 MHz,  $\text{CDCl}_3$ )  $\delta$  8.79 (s, 1H), 8.72 (s, 1H), 7.92–7.89 (m, 2H), 7.36 (t,  $J = 8.0$  Hz, 1H), 7.21 (d,  $J = 8.0$  Hz, 1H), 7.13–6.99 (m, 3H), 6.97–6.91 (m, 2H), 4.38 (m, 1H), 3.98 (s, 3H), 3.89 (s, 3H), 3.85 (s, 3H), 3.85–3.39 (m, 4H), 2.05 (m, 1H), 1.88 (m, 2H), 1.56 (m, 1H), 1.41 (bs, 9H).  $^{13}\text{C}$  NMR (100 MHz,  $\text{CDCl}_3$ )  $\delta$  165.5, 159.8, 159.3, 158.9, 154.7, 151.7, 144.2, 138.6, 137.4, 131.0, 130.0, 129.2, 128.2, 125.9, 123.8, 122.3, 122.0, 115.2, 114.9, 113.1, 113.0, 112.8, 111.0, 79.8, 72.9, 61.5, 55.9, 55.3, 47.7, 43.8, 30.9, 29.9, 28.4. IR (KBr)  $\nu_{\text{max}}$  3407, 2943, 2837, 1676, 1630, 1605, 1521, 1431, 1205, 1136  $\text{cm}^{-1}$ . HRMS (ESI $^+$ )  $m/z$ :  $[\text{M} + \text{H}^+]$  calcd for  $\text{C}_{35}\text{H}_{39}\text{N}_2\text{O}_9$ , 631.2656; found 631.2661.

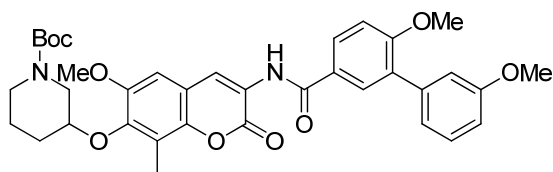

**Tert-butyl 3-(3-(3',6-dimethoxybiphenyl-3-ylcarboxamido)-6-methoxy-8-methyl-2-oxo-2H-chromen-7-yloxy)piperidine-1-carboxylate (56c).** Compound **56c** was obtained as a light brown amorphorous solid (135 mg, 95%).  $^1\text{H}$  NMR (400 MHz,  $\text{CDCl}_3$ )  $\delta$  8.78 (s, 1H), 8.76 (s, 1H), 7.93–7.91 (m, 2H), 7.37 (t,  $J = 8.0$  Hz, 1H), 7.14–7.06 (m, 3H), 6.94 (m, 1H), 6.85 (s, 1H), 4.32 (m, 1H), 3.94 (s, 6H), 3.86 (s, 3H), 3.82–3.59 (m, 2H), 3.21 (m, 2H), 2.38 (s, 3H), 2.06–1.77 (m, 3H), 1.51–1.48 (m, 1H), 1.42 (s, 9H).  $^{13}\text{C}$  NMR (100 MHz,  $\text{CDCl}_3$ )  $\delta$  165.5, 159.8, 159.3, 154.8, 150.1, 146.5, 143.5, 138.6, 131.0, 130.0, 129.2, 128.2, 126.1, 123.7, 123.0, 122.9, 122.0, 120.6, 115.3, 115.2, 113.1, 111.0, 106.5, 79.6, 76.4, 56.0, 55.9, 55.3, 30.9, 30.6, 29.3, 28.4, 21.7, 9.4. IR (KBr)  $\nu_{\text{max}}$  3402, 3333, 2976, 2931, 2868, 1713, 1680, 1632, 1604, 1529, 1425, 13666, 1232, 1201, 1167, 1095  $\text{cm}^{-1}$ . HRMS (ESI $^+$ )  $m/z$ :  $[\text{M} + \text{Na}^+]$  calcd for  $\text{C}_{36}\text{H}_{40}\text{N}_2\text{O}_9\text{Na}$ , 667.2632; found, 667.2629.

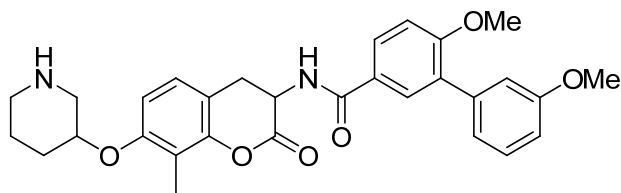

**3',6-dimethoxy-N-(8-methyl-2-oxo-7-(piperidin-3-yloxy)-2H-chromen-3-yl)biphenyl-3-carboxamide (57a).** Compound **57a** was obtained as white amorphous solid (23 mg, 79%).  $^1\text{H}$  NMR (400 MHz,  $\text{CDCl}_3$ )  $\delta$  8.68 (s, 1H), 8.64 (s, 1H), 7.86–7.84 (m, 2H), 7.33–7.30 (m, 2H), 7.09–6.88 (m, 5H), 4.50 (bs, 1H), 4.06–3.90 (m, 2H), 3.83 (s, 3H), 3.81 (s, 3H), 3.63–3.50 (m, 4H), 2.20 (s, 3H), 1.41 (bs, 3H), 1.22 (bs, 6H).  $^{13}\text{C}$  NMR (100 MHz,  $\text{CDCl}_3$ )  $\delta$  165.5, 159.9, 159.4, 159.3, 155.6, 149.3, 138.7, 131.0, 130.1, 129.3, 128.3, 126.0, 125.8, 123.8, 122.3, 122.2, 115.6, 115.4, 114.4, 113.2, 111.1, 110.3, 69.3, 56.0, 55.4, 46.8, 43.8, 28.0, 19.5, 8.7. IR (film)  $\nu_{\text{max}}$  3404, 2939, 2837, 1709, 1670, 1607, 1526, 1502, 1369, 1269, 1242, 1103, 1031  $\text{cm}^{-1}$ . HRMS (ESI $^+$ )  $m/z$ :  $[\text{M} + \text{H}^+]$  calcd for  $\text{C}_{30}\text{H}_{31}\text{N}_2\text{O}_6$ , 515.2182; found, 515.2186.

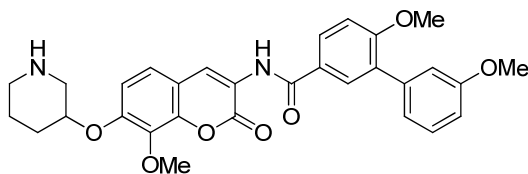

**3',6-dimethoxy-N-(8-methoxy-2-oxo-7-(piperidin-3-yloxy)-2H-chromen-3-yl)biphenyl-3-carboxamide (57b).** Compound **57b** was obtained as white amorphous solid (93 mg, 84%).  $^1\text{H}$  NMR (400 MHz, MeOD)  $\delta$  8.37 (s, 1H), 7.69–7.66 (m, 2H), 7.21 (t,  $J = 8.0$  Hz, 1H), 7.05 (d,  $J = 8.0$  Hz, 1H), 6.96–6.82 (m, 4H), 6.82 (dd,  $J = 8.2$  Hz, 2.3, 1H), 4.66 (m, 1H), 3.85 (s, 3H), 3.76 (s, 3H), 3.74 (s, 3H), 3.42–3.37 (m, 2H), 3.23–3.19 (m, 2H), 2.15–2.10 (m, 2H), 2.02–1.98 (m, 2H).  $^{13}\text{C}$  NMR (100 MHz, MeOD)  $\delta$  164.5, 158.4, 158.0, 156.8, 149.3, 142.8, 137.3, 136.3, 129.0, 128.5, 127.3, 126.8, 124.1, 123.2, 121.4, 121.0, 120.3, 114.5, 113.8, 113.0, 111.0, 109.6, 69.9, 59.6, 53.6, 53.1, 45.1, 42.3, 24.8, 16.6. IR (KBr)  $\nu_{\text{max}}$  3400, 2980, 2948, 2843, 1693, 1634,

1607, 1571, 1531, 1504, 1371, 1207, 1140, 1101  $\text{cm}^{-1}$ . HRMS (ESI<sup>+</sup>)  $m/z$ :  $[\text{M} + \text{H}^+]$  calcd for  $\text{C}_{30}\text{H}_{31}\text{N}_2\text{O}_7$ , 531.2131; found, 531.2129.

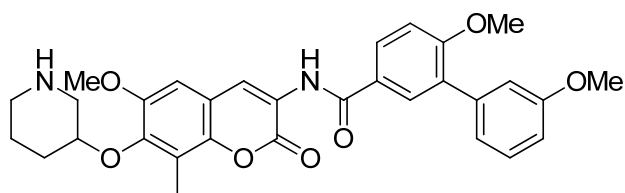

**3',6-dimethoxy-N-(6-methoxy-8-methyl-2-oxo-7-(piperidin-3-yloxy)-2H-chromen-3-yl)-[1,1'-biphenyl]-3-carboxamide (57c).** Compound **57c** was obtained as white amorphous solid (83 mg, 73%). <sup>1</sup>H NMR (400 MHz, DMSO-*d*<sub>6</sub>)  $\delta$  9.65 (s, 1H), 8.56 (s, 1H), 8.99 (dd,  $J = 8.4, 1.6$  Hz, 1H), 7.92 (s, 1H), 7.39–7.33 (m, 2H), 7.25 (d,  $J = 9.1$  Hz, 1H), 7.12–7.10 (m, 2H), 6.95 (d,  $J = 8.4$  Hz, 1H), 4.36 (m, 1H), 3.87 (s, 3H), 3.86 (s, 3H), 3.80 (s, 3H), 3.36–3.10 (m, 4H), 2.31 (s, 3H), 2.01–1.68 (m, 4H). <sup>13</sup>C NMR (100 MHz, DMSO-*d*<sub>6</sub>)  $\delta$  165.6, 159.6, 159.4, 158.5, 149.8, 146.4, 143.8, 139.1, 130.5, 129.9, 129.6, 127.9, 126.1, 123.5, 122.2, 119.7, 118.8, 115.7, 115.68, 113.0, 112.0, 108.0, 75.0, 56.6, 56.4, 55.6, 46.9, 43.4, 28.2, 19.5, 9.7. IR (KBr)  $\nu_{\text{max}}$  3398, 2976, 2867, 1677, 1642, 1460, 1535, 1502, 1205, 1142  $\text{cm}^{-1}$ . HRMS (ESI<sup>+</sup>)  $m/z$ :  $[\text{M} + \text{H}^+]$  calcd for  $\text{C}_{31}\text{H}_{33}\text{N}_2\text{O}_7$ , 545.2288; found, 545.2282.

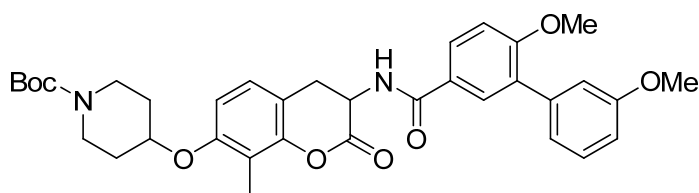

**Tert-butyl 4-(3-(3',6-dimethoxybiphenyl-3-ylcarboxamido)-8-methyl-2-oxo-2H-chromen-7-yloxy)piperidine-1-carboxylate (58a).** Compound **58a** was obtained a light brown amorphous solid (220 mg, 72%). <sup>1</sup>H NMR (400 MHz, CDCl<sub>3</sub>)  $\delta$  (CDCl<sub>3</sub>) 8.77 (s, 1H), 8.70 (s, 1H), 7.91–7.89 (m, 2H), 7.38–7.28 (m, 2H), 7.14–7.04 (m, 3H), 6.94–6.86 (m, 2H), 4.60 (m, 1H), 3.89 (s, 3H), 3.86 (s, 3H), 3.67–3.63 (m, 2H), 3.47–3.46 (m, 2H), 2.33 (s, 3H), 1.93–1.81

(m, 4H), 1.49 (s, 9H).  $^{13}\text{C}$  NMR (100 MHz,  $\text{CDCl}_3$ )  $\delta$  165.5, 159.8, 159.5, 159.4, 156.7, 154.9, 149.5, 138.7, 131.0, 130.0, 129.2, 128.2, 126.1, 125.7, 124.2, 122.1, 121.8, 115.33, 115.29, 113.6, 113.2, 111.1, 110.5, 79.8, 72.8, 56.0, 55.4, 30.6, 28.5, 22.0, 21.8, 8.4. IR (film)  $\nu_{\text{max}}$  3400, 2980, 2864, 1717, 1699, 1683, 1635, 1558, 1521, 1386, 1244, 1105  $\text{cm}^{-1}$ . HRMS ( $\text{ESI}^+$ )  $m/z$ :  $[\text{M} + \text{Na}^+]$  calcd for  $\text{C}_{35}\text{H}_{38}\text{N}_2\text{O}_8\text{Na}$ , 637.2526; found, 637.2523.

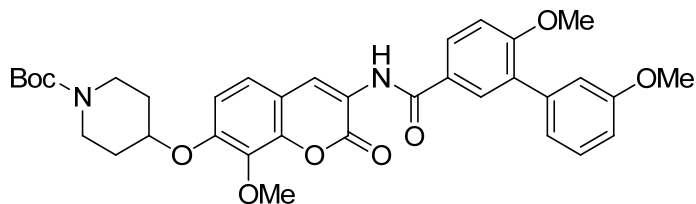

**Tert-butyl 4-(3-(3',6-dimethoxybiphenyl-3-ylcarboxamido)-8-methoxy-2-oxochromen-7-yloxy)piperidine-1-carboxylate (58b).** Compound **58b** was obtained as a light brown amorphous solid (156 mg, 85%).  $^1\text{H}$  NMR (500 MHz,  $\text{CDCl}_3$ )  $\delta$  8.81 (s, 1H), 8.73 (s, 1H), 7.93–7.90 (m, 2H), 7.37 (t,  $J = 8.0$  Hz, 1H), 7.22 (d,  $J = 8.7$  Hz, 1H), 7.14–7.07 (m, 3H), 6.96–6.93 (m, 2H), 4.61–4.58 (m, 1H), 4.01 (s, 3H), 3.91 (s, 3H), 3.87 (s, 3H), 3.77–3.72 (m, 2H), 3.42 (m, 2H), 2.00–1.96 (m, 2H), 1.85–1.82 (m, 2H), 1.49 (s, 9H).  $^{13}\text{C}$  NMR (100 MHz,  $\text{CDCl}_3$ )  $\delta$  165.5, 159.8, 159.3, 158.8, 154.8, 151.7, 144.3, 138.6, 137.8, 131.0, 130.0, 129.2, 128.2, 125.9, 123.7, 122.4, 122.3, 122.0, 115.3, 115.1, 113.6, 113.1, 111.0, 79.7, 74.5, 61.5, 55.9, 55.3, 53.5, 30.7, 28.4, 21.7. IR (KBr)  $\nu_{\text{max}}$  3404, 2978, 2935, 1701, 1637, 1605, 1521, 1431, 1389, 1373, 1232, 1207, 1180, 1086  $\text{cm}^{-1}$ . HRMS ( $\text{ESI}^+$ )  $m/z$ :  $[\text{M} + \text{H}^+]$  calcd for  $\text{C}_{35}\text{H}_{39}\text{N}_2\text{O}_9$ , 631.2656; found, 631.2652.

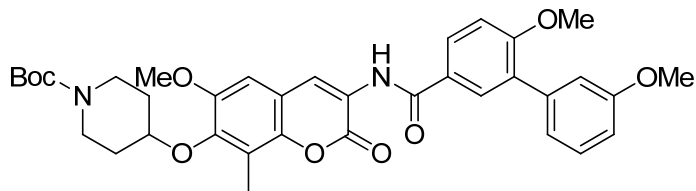



**Tert-butyl 4-(3-(3',6-dimethoxybiphenyl-3-ylcarboxamido)-6-methoxy-8-methyl-2-oxochromen-7-yloxy)piperidine-1-carboxylate (58c).** Compound **58c** was obtained as a light brown amorphorous solid (120 mg, 69%).  $^1\text{H}$  NMR (400 MHz,  $\text{CDCl}_3$ )  $\delta$  8.76 (s, 1H), 8.75 (s, 1H), 7.92–7.89 (m, 2H), 7.36 (t,  $J = 8.0$  Hz, 1H), 7.13–7.04 (m, 3H), 6.94–6.91 (m, 1H), 6.83 (s, 1H), 4.37–4.33 (m, 1H), 3.88 (s, 6H), 3.86 (s, 3H), 3.90–3.86 (m, 2H), 3.11–3.06 (m, 2H), 2.37 (s, 3H), 1.90 (m, 2H), 1.75–1.71 (m, 2H), 1.48 (s, 9H).  $^{13}\text{C}$  NMR (100 MHz,  $\text{CDCl}_3$ )  $\delta$  165.5, 159.8, 159.32, 159.28, 154.8, 150.3, 146.7, 143.4, 138.6, 131.0, 130.0, 129.2, 128.2, 126.0, 123.6, 123.0, 122.0, 120.6, 115.28, 115.23, 113.1, 111.0, 106.5, 79.6, 78.6, 56.0, 55.9, 55.3, 31.7 (2C), 28.5, 21.7 (2C), 9.7. IR (KBr)  $\nu_{\text{max}}$  3404, 2939, 2860, 1697, 1674, 1636, 1605, 1522, 1500, 1382, 1242, 1207, 1176, 1026  $\text{cm}^{-1}$ . HRMS (ESI $^+$ )  $m/z$ :  $[\text{M} + \text{H}^+]$  calcd for  $\text{C}_{36}\text{H}_{41}\text{N}_2\text{O}_9$ , 645.2812; found, 645.2810.

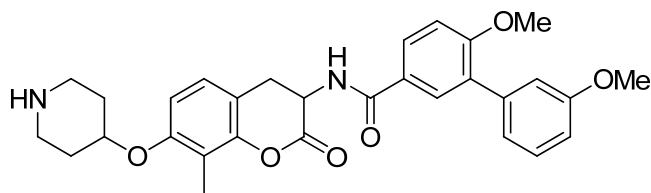

**3',6-dimethoxy-N-(8-methyl-2-oxo-7-(piperidin-4-yloxy)-2H-chromen-3-yl)biphenyl-3-carboxamide (59a).** Compound **59a** was obtained as a white amorphorous solid (41 mg, 68%).  $^1\text{H}$  NMR (400 MHz,  $\text{CDCl}_3$ )  $\delta$  ( $\text{CDCl}_3$ ) 8.82 (s, 1H), 8.73 (s, 1H), 7.95–7.91 (m, 2H), 7.41–7.35 (m, 2H), 7.15–7.08 (m, 3H), 6.95 (d,  $J = 4.0$  Hz, 1H), 6.88 (d,  $J = 4.8$  Hz, 1H), 4.66 (m, 1H), 3.92 (s, 3H), 3.88 (s, 3H), 3.27 (m, 2H), 3.04 (m, 2H), 2.38 (s, 3H), 2.19–2.16 (m, 2H), 1.99 (m, 2H).  $^{13}\text{C}$  NMR (100 MHz,  $\text{CDCl}_3$ )  $\delta$  ( $\text{CDCl}_3$ ) 165.7, 160.0, 159.6, 159.5, 156.5, 149.6, 138.8, 131.2, 130.2, 129.4, 128.4, 126.2, 125.8, 124.3, 122.2, 122.1, 115.5, 115.4, 113.9, 113.3, 111.2, 110.5, 71.5, 56.1, 55.5, 42.0 (2C), 29.8 (2C), 8.6. IR (film)  $\nu_{\text{max}}$  3400, 2933, 2833, 1699, 1668, 1601,

1522, 1499, 1366, 1236, 1204, 1134, 1101, 1028  $\text{cm}^{-1}$ . HRMS (ESI<sup>+</sup>)  $m/z$ :  $[M + H^+]$  calcd for  $\text{C}_{30}\text{H}_{31}\text{N}_2\text{O}_6$ , 515.2182; found, 515.2189.

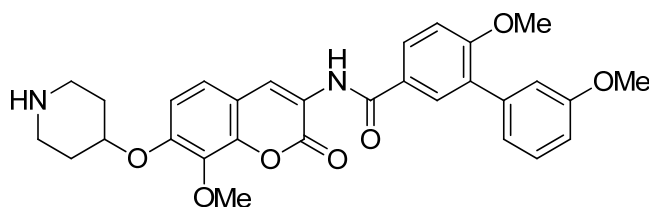

**3',6-dimethoxy-N-(8-methoxy-2-oxo-7-(piperidin-4-yloxy)chromen-3-yl)biphenyl-3-carboxamide (59b).** Compound **59b** was obtained as a white amorphous solid (145 mg, 93%). <sup>1</sup>H NMR (500 MHz,  $\text{CDCl}_3$ )  $\delta$  8.37 (s, 1H), 7.69–7.66 (m, 2H), 7.21 (t,  $J = 8.5$  Hz, 1H), 7.05 (d,  $J = 8.0$  Hz, 1H), 6.96–6.92 (m, 4H), 6.82–6.80 (m, 1H), 4.66 (m, 1H), 3.85 (s, 3H), 3.76 (s, 3H), 3.74 (s, 3H), 3.42–3.37 (m, 2H), 3.23–3.19 (m, 2H), 2.15–2.10 (m, 2H), 2.02–1.98 (m, 2H). <sup>13</sup>C NMR (125 MHz,  $\text{CDCl}_3$ )  $\delta$  167.1, 161.2, 160.8, 159.7, 152.4, 145.6, 140.1, 138.8, 131.7, 131.3, 130.1, 129.5, 126.8, 126.1, 124.1, 123.5, 123.1, 116.6, 116.5, 114.8, 113.8, 112.3, 72.1, 62.1, 56.4, 55.9, 41.8, 28.5. IR (KBr)  $\nu_{\text{max}}$  3414, 2966, 2927, 1680, 1632, 1610, 1410, 1371, 1277, 1205, 1142  $\text{cm}^{-1}$ . HRMS (ESI<sup>+</sup>)  $m/z$ :  $[M + H^+]$  calcd for  $\text{C}_{30}\text{H}_{31}\text{N}_2\text{O}_7$ , 531.2131; found, 531.2120.

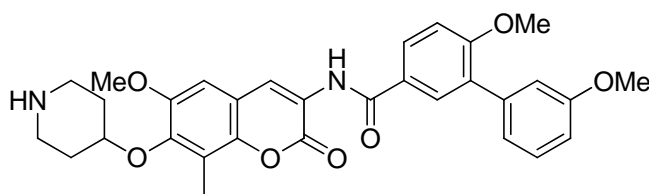

**3',6-dimethoxy-N-(6-methoxy-8-methyl-2-oxo-7-(piperidin-4-yloxy)-2H-chromen-3-yl)-[1,1'-biphenyl]-3-carboxamide (59c).** Compound **59c** was obtained as a white amorphous solid (74 mg, 88%). <sup>1</sup>H NMR (400 MHz,  $\text{CDCl}_3$ )  $\delta$  (DMSO- $d_6$ ) 9.66 (s, 1H), 8.54 (s, 1H), 7.99 (d,  $J = 8.0$  Hz, 1H), 7.92 (s, 1H), 7.37 (t,  $J = 8.0$  Hz, 1H), 7.31 (s, 1H), 7.25 (d,  $J = 8.0$  Hz, 1H), 7.12–7.10 (m, 2H), 6.96 (d,  $J = 8.0$  Hz, 1H), 4.38 (m, 1H), 3.86 (s, 3H), 3.85 (s, 3H), 3.80 (s,

3H), 3.31 (m, 2H), 3.06 (m, 2H), 2.28 (s, 3H), 2.04 (m, 2H), 1.89 (m, 2H).  $^{13}\text{C}$  NMR (100 MHz, DMSO- $d_6$ )  $\delta$  165.6, 159.6, 159.4, 158.2, 150.1, 146.5, 143.9, 139.1, 130.5, 129.9, 129.6, 128.3, 126.1, 123.3, 122.2, 119.7, 119.0, 115.7, 115.4, 113.0, 112.0, 107.9, 75.6, 56.6, 56.4, 49.0, 41.3, 28.7, 9.7. IR (KBr)  $\nu_{\text{max}}$  3400, 2970, 2849, 1678, 1632, 1605, 1433, 1385, 1205, 1138, 1026  $\text{cm}^{-1}$ . HRMS (ESI $^+$ )  $m/z$ :  $[\text{M} + \text{H}^+]$  calcd for  $\text{C}_{31}\text{H}_{33}\text{N}_2\text{O}_7$ , 545.2288; found, 545.2288.

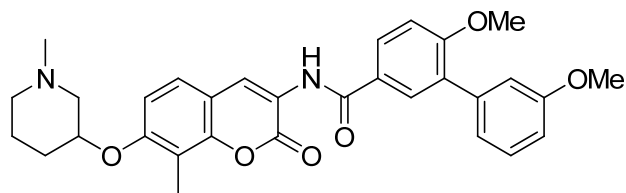

**3',6-dimethoxy-N-(8-methyl-7-(1-methylpiperidin-3-yloxy)-2-oxo-2H-chromen-3-yl)biphenyl-3-carboxamide (60a).** Compound **60a** was obtained as a light brown amorphous solid (35 mg, 41%).  $^1\text{H}$  NMR (400 MHz,  $\text{CDCl}_3$ )  $\delta$  8.82 (s, 1H), 8.72 (s, 1H), 7.96–7.91 (m, 2H), 7.41–7.34 (m, 2H), 7.15–7.08 (m, 3H), 6.98–6.94 (m, 2H), 4.47 (m, 1H), 3.92 (s, 3H), 3.88 (s, 3H), 3.09–3.07 (m, 1H), 2.76–2.74 (m, 1H), 2.36 (s, 3H), 2.34 (s, 3H), 2.20–2.07 (m, 2H), 1.90–1.86 (m, 1H), 1.72–1.64 (m, 2H), 1.54–1.50 (m, 1H).  $^{13}\text{C}$  NMR (100 MHz,  $\text{CDCl}_3$ )  $\delta$  165.4, 159.8, 159.5, 159.3, 157.3, 149.4, 138.6, 131.0, 130.0, 129.2, 128.1, 126.1, 125.6, 124.3, 122.0, 121.6, 115.3, 115.2, 113.5, 113.1, 111.0, 110.9, 74.2, 59.9, 55.9, 55.4, 55.3, 46.3, 29.8, 23.3, 8.4. IR (film)  $\nu_{\text{max}}$  3406, 2939, 2839, 1705, 1674, 1605, 1526, 1502, 1367, 1269, 1242, 1205, 1182, 1138, 1105, 1036  $\text{cm}^{-1}$ . HRMS (ESI $^+$ )  $m/z$ :  $[\text{M} + \text{H}^+]$  calcd for  $\text{C}_{31}\text{H}_{33}\text{N}_2\text{O}_6$ , 529.2339; found, 529.2335.

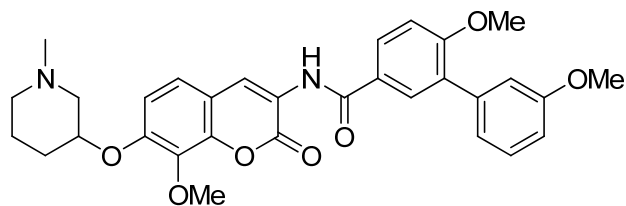

**3',6-dimethoxy-N-(8-methoxy-7-(1-methylpiperidin-3-yloxy)-2-oxo-2H-chromen-3-yl)biphenyl-3-carboxamide (60b).** Compound **60b** was obtained a light brown amorphorous solid (16 mg, 52%).  $^1\text{H}$  NMR (400 MHz,  $\text{CDCl}_3$ )  $\delta$  8.81 (s, 1H), 8.72 (s, 1H), 7.94–7.90 (m, 2H), 7.39 (t,  $J = 8.0$  Hz, 1H), 7.21 (d,  $J = 8.7$  Hz, 1H), 7.15–7.07 (m, 3H), 6.98 (d,  $J = 8.7$  Hz, 1H), 6.95 (dd,  $J = 8.0, 2.4$  Hz, 1H), 4.48 (m, 1H), 4.01 (s, 3H), 3.91 (s, 3H), 3.87 (s, 3H), 3.06 (d,  $J = 10.0$  Hz, 1H), 2.71 (d,  $J = 10.0$  Hz, 1H), 2.34 (s, 3H), 2.10 (t,  $J = 9.7$  Hz, 1H), 2.13–2.06 (m, 2H), 1.89–1.69 (m, 1H), 1.69–1.66 (m, 1H), 1.55–1.52 (m, 1H).  $^{13}\text{C}$  NMR (100 MHz,  $\text{CDCl}_3$ )  $\delta$  165.5, 159.8, 159.3, 158.9, 152.1, 144.2, 138.6, 137.6, 131.1, 130.0, 129.2, 128.2, 126.0, 123.9, 122.4, 122.2, 122.0, 115.3, 114.8, 113.3, 113.2, 111.0, 74.9, 61.5, 59.8, 55.9, 55.3 (2C), 46.3, 29.6, 23.2. IR (KBr)  $\nu_{\text{max}}$  3407, 2939, 2870, 2850, 1711, 1673, 1605, 1529, 1367, 1244, 1278, 1090  $\text{cm}^{-1}$ . HRMS (ESI $^+$ )  $m/z$ :  $[\text{M} + \text{H}^+]$  calcd for  $\text{C}_{31}\text{H}_{33}\text{N}_2\text{O}_7$ , 545.2288; found, 545.2298.

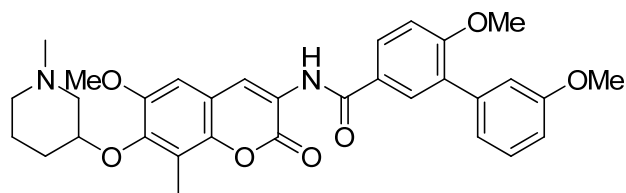

**3',6-dimethoxy-N-(6-methoxy-8-methyl-7-(1-methylpiperidin-3-yloxy)-2-oxo-2H-chromen-3-yl)biphenyl-3-carboxamide (60c).** Compound **60c** was obtained a light brown amorphorous solid (47 mg, 60 %).  $^1\text{H}$  NMR (400 MHz,  $\text{CDCl}_3$ )  $\delta$  8.81 (s, 1H), 8.77 (s, 1H), 7.95–7.91 (m, 2H), 7.39 (t,  $J = 8.0$  Hz, 1H), 7.15–7.08 (m, 3H), 6.95 (dd,  $J = 8.0, 2.4$  Hz, 1H), 6.85 (s, 1H), 4.35 (m, 1H), 3.92 (s, 3H), 3.90 (s, 3H), 3.88 (s, 3H), 3.00 (d,  $J = 8.0$  Hz, 1H), 2.69 (d,  $J = 8.0$  Hz, 1H), 2.41 (s, 3H), 2.34 (s, 3H), 2.24 (t,  $J = 8.0$  Hz, 1H), 2.09–2.01 (m, 3H), 1.88–1.85 (m, 1H), 1.63–1.49 (m, 2H).  $^{13}\text{C}$  NMR (100 MHz,  $\text{CDCl}_3$ )  $\delta$  165.5, 159.8, 159.4, 159.3, 150.4, 147.0, 143.4, 138.6, 131.1, 130.0, 129.2, 128.2, 126.1, 123.8, 122.9, 122.0, 120.8, 115.3, 115.2, 113.1, 111.0, 106.3, 78.2, 60.5, 56.0, 55.9, 55.4, 55.3, 46.4, 30.3, 23.4, 9.6. IR (KBr)  $\nu_{\text{max}}$

3408, 2978, 2934, 2874, 2858, 1713, 1633, 1603, 1520, 1467, 1373, 1288, 1226, 1203, 1105  $\text{cm}^{-1}$

<sup>1</sup>. HRMS (ESI<sup>+</sup>) m/z: [M + H<sup>+</sup>] calcd for C<sub>32</sub>H<sub>35</sub>N<sub>2</sub>O<sub>7</sub>, 559.2444; found, 559.2446.

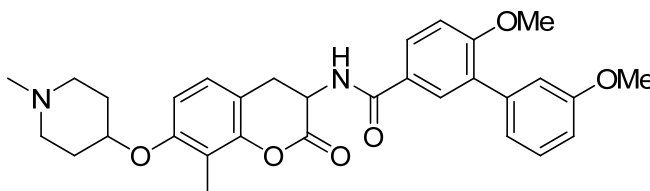

**3',6-dimethoxy-N-(8-methyl-7-(1-methylpiperidin-4-yloxy)-2-oxo-2H-chromen-3-yl)biphenyl-3-carboxamide (61a).** Compound **61a** was obtained a light brown amorphorous solid (56 mg, 46 %). <sup>1</sup>H NMR (400 MHz, CDCl<sub>3</sub>) δ 8.76 (s, 1H), 8.67 (s, 1H), 7.92–7.86 (m, 2H), 7.36–7.33 (m, 2H), 7.11–7.08 (m, 3H), 6.93–6.89 (m, 2H), 4.54 (m, 1H), 3.89 (s, 3H), 3.84 (s, 3H), 2.80–2.76 (m, 2H), 2.57 (m, 2H), 2.41 (s, 3H), 2.33 (s, 3H), 2.19–2.12 (m, 2H), 1.97–1.95 (m, 2H). <sup>13</sup>C NMR (100 MHz, CDCl<sub>3</sub>) δ 165.1, 159.7, 159.4, 159.3, 157.0, 149.4, 138.9, 130.8, 130.8, 129.8, 128.1, 126.1, 125.5, 123.9, 121.9, 121.7, 115.3, 115.0, 113.2, 112.8, 111.0, 110.5, 73.1, 55.8, 55.3, 52.5, 46.0 (2C), 30.9 (2C), 8.1. IR (film)  $\nu_{\text{max}}$  3406, 2939, 2839, 1705, 1674, 1605, 1526, 1502, 1367, 1242, 1205, 1182, 1138, 1105, 1036  $\text{cm}^{-1}$ . HRMS (ESI<sup>+</sup>) m/z: [M + H<sup>+</sup>] calcd for C<sub>31</sub>H<sub>33</sub>N<sub>2</sub>O<sub>6</sub>, 529.2339; found, 529.2334.

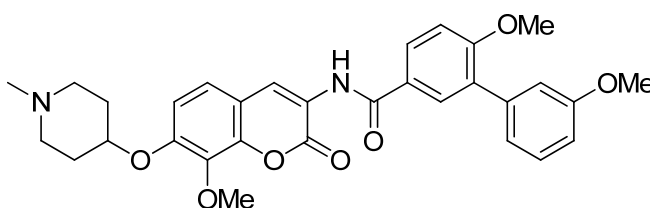

**3',6-dimethoxy-N-(8-methoxy-7-((1-methylpiperidin-4-yl)oxy)-2-oxo-2H-chromen-3-yl)-[1,1'-biphenyl]-3-carboxamide (61b).** Compound **61b** was obtained a light brown amorphorous solid (47 mg, 66 %). <sup>1</sup>H NMR (400 MHz, CDCl<sub>3</sub>) δ 8.82 (s, 1H), 8.74 (s, 1H), 7.94–7.88 (m, 2H), 7.38 (t, *J* = 8.0 Hz, 1H), 7.28 (d, *J* = 8.0 Hz, 1H), 7.14–7.08 (m, 3H), 6.98–6.94 (m, 2H), 4.78 (m, 1H), 4.03 (s, 3H), 3.92 (s, 3H), 3.87 (s, 3H), 3.56–3.53 (m, 2H), 3.35–3.30 (m, 2H), 2.92

(s, 3H), 2.38–2.20 (m, 4H).  $^{13}\text{C}$  NMR (100 MHz,  $\text{CDCl}_3$ )  $\delta$  165.9, 160.0, 159.3, 158.5, 150.4, 144.3, 138.5, 138.2, 131.1, 130.0, 129.2, 128.3, 125.6, 123.7, 123.1, 122.8, 122.0, 116.2, 115.3, 114.3, 113.1, 111.1, 68.8, 61.8, 55.9, 55.3, 49.9 (2C), 44.1, 27.2 (2C). IR (KBr)  $\nu_{\text{max}}$  406, 2941, 2928, 2853, 1713, 1666, 1605, 1526, 1502, 1462, 1367, 1277, 1244, 1207, 1086, 1045  $\text{cm}^{-1}$ . HRMS (ESI $^+$ )  $m/z$ :  $[\text{M} + \text{H}^+]$  calcd for  $\text{C}_{31}\text{H}_{33}\text{N}_2\text{O}_7$ , 545.2288; found, 545.2281.

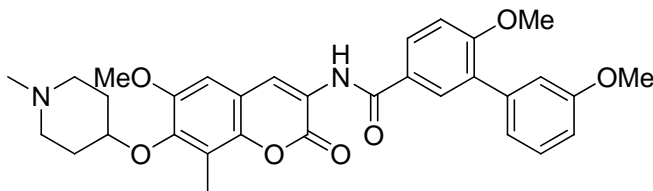

**3',6-dimethoxy-N-(6-methoxy-8-methyl-7-((1-methylpiperidin-4-yl)oxy))-2-oxo-2H-chromen-3-yl-[1,1'-biphenyl]-3-carboxamide (61c).** Compound **61c** was obtained a light brown amorphous solid (43 mg, 74%).  $^1\text{H}$  NMR (400 MHz,  $\text{CDCl}_3$ )  $\delta$  8.80 (s, 1H), 8.77 (s, 1H), 7.95–7.91 (m, 2H), 7.38 (t,  $J = 8.0$  Hz, 1H), 7.15–7.08 (m, 3H), 6.95 (dd,  $J = 8.0, 2.4$  Hz, 1H), 6.86 (s, 1H), 4.30 (m, 1H), 3.90 (s, 3H), 3.88 (s, 3H), 3.86 (s, 3H), 2.97 (m, 2H), 2.52–2.46 (m, 5H), 2.40 (s, 3H), 2.11 (m, 2H), 2.00 (m, 2H).  $^{13}\text{C}$  NMR (100 MHz,  $\text{CDCl}_3$ )  $\delta$  165.6, 159.8, 159.33, 159.31, 150.2, 146.8, 143.5, 138.6, 131.1, 130.0, 129.2, 128.2, 126.0, 123.6, 123.1, 122.0, 120.6, 115.34, 115.28, 113.1, 111.0, 106.5, 77.3, 56.0, 55.9, 55.3, 52.4 (2C), 45.3, 30.8 (2C), 9.7. IR (KBr)  $\nu_{\text{max}}$  3404, 2937, 2841, 1718, 1649, 1602, 1577, 1477, 1465, 1371, 1249, 1207, 1180, 1138, 1083  $\text{cm}^{-1}$ . HRMS (ESI $^+$ )  $m/z$ :  $[\text{M} + \text{H}^+]$  calcd for  $\text{C}_{32}\text{H}_{35}\text{N}_2\text{O}_7$ , 559.2444; found, 559.2448.

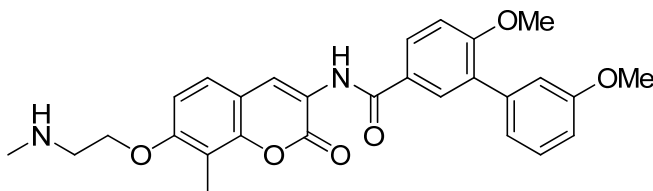

**3',6-dimethoxy-N-(8-methyl-7-(2-(methylamino)ethoxy)-2-oxo-2H-chromen-3-yl)biphenyl-3-carboxamide (64a).** Compound **64a** was obtained after acidic deprotection of **63a** as a light brown amorphous solid (174 mg, 65% over 2 steps). <sup>1</sup>HNMR (400 MHz, CD<sub>3</sub>OD) δ 8.61 (s, 1H), 7.93 (dd, *J* = 8.6, 2.2 Hz, 1H), 7.87 (d, *J* = 2.2 Hz, 1H), 7.45 (d, *J* = 8.6 Hz, 1H), 7.32 (t, *J* = 8.2 Hz, 1H), 7.19 (d, *J* = 8.6 Hz, 1H), 7.09–7.05 (m, 3H), 6.91 (dd, *J* = 8.2, 1.5 Hz, 1H), 4.38 (t, *J* = 8.0 Hz, 2H), 3.89 (s, 3H), 3.83 (s, 3H), 3.53 (t, *J* = 8.0 Hz, 2H), 2.85 (s, 3H), 2.35 (s, 3H). <sup>13</sup>C NMR (100 MHz, DMSO-*d*<sub>6</sub>) δ 165.3, 159.3, 159.1, 158.4, 157.7, 149.7, 138.8, 130.1, 129.6, 129.5, 129.3, 126.4, 125.9, 121.9, 121.5, 118.8, 115.8, 115.4, 113.2, 113.0, 111.7, 109.2, 65.3, 56.0, 55.2, 48.0, 33.7, 8.1. IR (KBr)  $\nu_{max}$  3433 (broad), 2924, 2851, 1691, 1652, 1601, 1462, 1382, 1209, 1145, 1020 cm<sup>-1</sup>. HRMS (ESI<sup>+</sup>) *m/z*: [M + H<sup>+</sup>] calcd for C<sub>28</sub>H<sub>29</sub>N<sub>2</sub>O<sub>6</sub>, 489.2026; found, 489.2020.

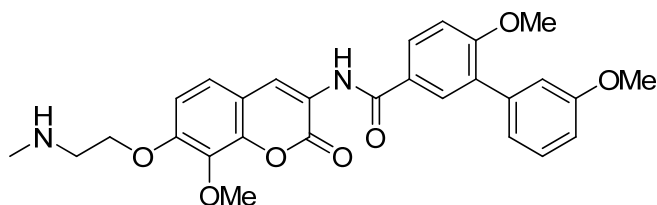

**3',6-dimethoxy-N-(8-methoxy-7-(2-(methylamino)ethoxy)-2-oxo-2H-chromen-3-yl)biphenyl-3-carboxamide (64b).** Compound **64b** was obtained after acidic deprotection of **63b** as a light yellow amorphous solid (112 mg, 89% over 2 steps). <sup>1</sup>HNMR (400 MHz, CD<sub>3</sub>OD) δ 8.59 (s, 1H), 7.90 (dd, *J* = 8.6, 2.4 Hz, 1H), 7.85 (d, *J* = 2.4 Hz, 1H), 7.32–7.29 (m, 2H), 7.16 (d, *J* = 8.6 Hz, 1H), 7.10 (d, *J* = 8.8 Hz, 1H), 7.07–7.06 (m, 2H), 6.91–6.89 (m, 1H), 4.40 (t, *J* = 4.9 Hz, 2H), 3.98 (s, 3H), 3.87 (s, 3H), 3.82 (s, 3H), 3.52 (t, *J* = 4.9 Hz, 2H), 2.85 (s, 3H). <sup>13</sup>CNMR (100 MHz, CD<sub>3</sub>OD) δ 168.0, 161.5, 161.0, 159.9, 153.7, 145.8, 140.3, 138.0, 132.2, 131.4, 130.2, 129.8, 127.2, 127.0, 124.4, 123.9, 123.1, 117.0, 116.5, 113.9, 113.1, 112.5, 66.7, 62.4, 56.5, 55.9, 49.6, 34.2. IR (KBr)  $\nu_{max}$  3402 (broad), 2926, 2851, 1702, 1678, 1601, 1479, 1383,

1248, 1209, 1146, 1099, 1020  $\text{cm}^{-1}$ . HRMS (ESI<sup>+</sup>)  $m/z$ : [M + H<sup>+</sup>] calcd for C<sub>28</sub>H<sub>29</sub>N<sub>2</sub>O<sub>7</sub>, 505.1975; found, 505.1977.

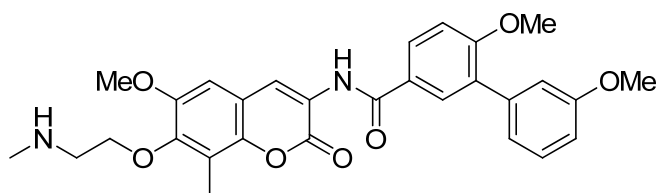

**3',6-dimethoxy-N-(6-methoxy-8-methyl-7-(2-(methylamino)ethoxy)-2-oxo-2H-chromen-3-yl)biphenyl-3-carboxamide (64c).** Compound **64c** was obtained after acidic deprotection of **63c** as a light yellow amorphous solid (59 mg, 47% over 2 steps). <sup>1</sup>HNMR (400 MHz, CD<sub>3</sub>OD)  $\delta$  8.53 (s, 1H), 7.84–7.79 (m, 2H), 6.98 (t,  $J$  = 8.0 Hz, 1H), 6.78–6.74 (m, 3H), 6.59 (s, 1H), 6.58 (dd,  $J$  = 8.0, 1.5 Hz, 1H), 3.89 (t,  $J$  = 4.5 Hz, 2H), 3.56 (s, 3H), 3.11 (t,  $J$  = 4.5 Hz, 2H), 3.05 (s, 3H), 3.01 (s, 3H), 2.53 (s, 3H), 1.98 (s, 3H). <sup>13</sup>CNMR (100 MHz, CD<sub>3</sub>OD)  $\delta$  170.0, 163.8, 163.3, 162.7, 153.7, 150.4, 147.0, 142.6, 134.4, 133.7, 132.6, 132.1, 129.4, 128.6, 127.0, 125.5, 123.7, 120.0, 119.0, 116.2, 114.8, 110.6, 71.3, 59.1, 58.8, 58.3, 52.8, 36.3, 11.4. IR (KBr)  $\nu_{\text{max}}$  3450 (broad), 2924, 2845, 1708, 1678, 1602, 1464, 1383, 1277, 1209, 1146, 1020  $\text{cm}^{-1}$ . HRMS (ESI<sup>+</sup>)  $m/z$ : [M + H<sup>+</sup>] calcd for C<sub>29</sub>H<sub>31</sub>N<sub>2</sub>O<sub>7</sub>, 519.2131; found, 519.2128.

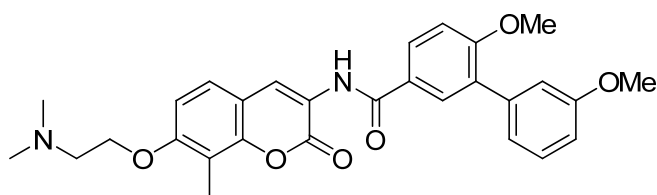

**N-(7-(2-(dimethylamino)ethoxy)-8-methyl-2-oxo-2H-chromen-3-yl)-3,6-dimethoxybiphenyl-3-carboxamide (65a).** Compound **65a** was obtained as colorless amorphous solid (52 mg, 66%). <sup>1</sup>H NMR (400 MHz, CDCl<sub>3</sub>)  $\delta$  8.80 (s, 1H), 8.70 (s, 1H), 7.93–7.89 (m, 2H), 7.39–7.34 (m, 2H), 7.14–7.06 (m, 3H), 6.94 (dd,  $J$  = 8.2, 2.4 Hz, 1H), 6.88 (d,  $J$  = 8.7, 1H), 4.17 (t,  $J$  = 5.8 Hz, 2H), 3.90 (s, 3H), 3.86 (s, 3H), 2.81 (t,  $J$  = 5.8 Hz, 2H), 2.38 (s,



6H), 2.34 (s, 3H).  $^{13}\text{C}$ NMR (100 MHz,  $\text{CDCl}_3$ )  $\delta$  165.5, 159.8, 159.6, 159.3, 158.3, 149.2, 138.6, 131.0, 130.0, 129.2, 128.2, 126.1, 125.7, 124.4, 122.0, 121.6, 115.2, 114.2, 113.5, 113.2, 11.0, 108.9, 67.5, 58.3, 55.9, 55.3, 46.2, 8.4. IR (KBr)  $\nu_{\text{max}}$  3406, 2926, 2851, 1709, 1667, 1605, 1582, 1500, 1441, 1367, 1269, 1246, 1207, 1180, 1140, 1113  $\text{cm}^{-1}$ . HRMS (ESI $^+$ )  $m/z$ :  $[\text{M} + \text{H}^+]$  calcd for  $\text{C}_{29}\text{H}_{31}\text{N}_2\text{O}_6$ , 503.2182; found, 503.2181.

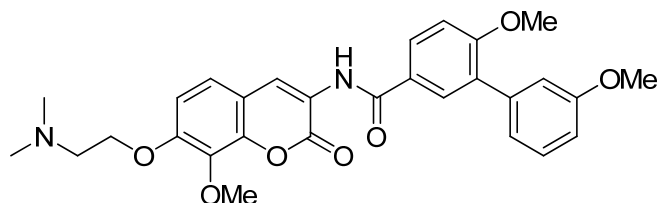

**N-(7-(2-(dimethylamino)ethoxy)-8-methoxy-2-oxo-2H-chromen-3-yl)-3',6-dimethoxybiphenyl-3-carboxamide (65b).** Compound **65b** was obtained as a light yellow amorphous solid (47 mg, 70%).  $^1\text{H}$  NMR (400 MHz,  $\text{CDCl}_3$ )  $\delta$  8.80 (s, 1H), 8.71(s, 1H), 7.93–7.89 (m, 2H), 7.37 (t,  $J = 8.0$  Hz, 1H), 7.22 (d,  $J = 8.8$  Hz, 1H), 7.13–7.06 (m, 3H), 6.95–6.92 (m, 2H), 4.21 (t,  $J = 5.9$  Hz, 2H), 4.00 (s, 3H), 3.90 (s, 3H), 3.86 (s, 3H), 2.82 (t,  $J = 5.9$  Hz, 2H), 2.38 (s, 6H).  $^{13}\text{C}$ NMR (100 MHz,  $\text{CDCl}_3$ )  $\delta$  165.5, 159.8, 159.3, 158.9, 153.3, 144.0, 138.6, 136.7, 131.1, 130.0, 129.2, 128.2, 126.0, 123.9, 122.5, 122.1, 122.0, 115.3, 114.7, 113.2, 111.2, 111.0, 68.0, 61.6, 58.1, 55.9, 55.3, 46.0. IR (KBr)  $\nu_{\text{max}}$  3404, 2928, 2853, 1693, 1648, 1605, 1479, 1367, 1248, 1207, 1113, 1032, 1022  $\text{cm}^{-1}$ . HRMS (ESI $^+$ )  $m/z$ :  $[\text{M} + \text{H}^+]$  calcd for  $\text{C}_{29}\text{H}_{31}\text{N}_2\text{O}_7$ , 519.2131; found, 519.2135.

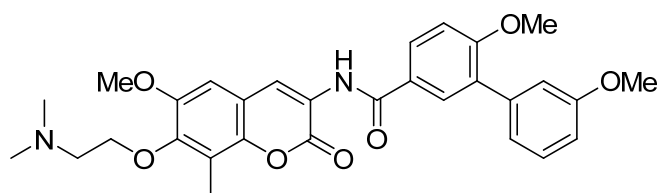

**N-(7-(2-(dimethylamino)ethoxy)-6-methoxy-8-methyl-2-oxo-2H-chromen-3-yl)-3',6-dimethoxybiphenyl-3-carboxamide (65c).** Compound **65c** was obtained as a white amorphous

solid (41 mg, 64%).  $^1\text{H}$  NMR (400 MHz,  $\text{CDCl}_3$ )  $\delta$  8.80 (s, 1H), 8.77 (s, 1H), 7.94–7.91 (m, 2H), 7.38 (t,  $J = 8.0$  Hz, 1H), 7.15–7.08 (m, 3H), 6.96–6.94 (m, 1H), 6.86 (s, 1H), 4.15 (t,  $J = 5.7$  Hz, 2H), 3.91 (s, 6H), 3.88 (s, 3H), 2.83 (t,  $J = 5.7$  Hz, 2H), 2.47 (s, 3H), 2.45 (s, 3H), 2.41 (s, 3H).  $^{13}\text{C}$  NMR (100 MHz,  $\text{CDCl}_3$ )  $\delta$  165.5, 159.8, 159.4 (2C), 150.3, 148.1, 143.4, 138.6, 131.1, 130.0, 129.2, 128.2, 126.0, 123.7, 123.1, 122.0, 120.4, 115.5, 115.3, 113.1, 111.0, 106.5, 70.5, 59.0, 56.0, 55.9, 55.3, 45.6, 9.0. IR (KBr)  $\nu_{\text{max}}$  3398, 2954, 2847, 1706, 1674, 1605, 1582, 1529, 1502, 1468, 1381, 1246, 1207, 1144, 1022  $\text{cm}^{-1}$ . HRMS (ESI $^+$ )  $m/z$ :  $[\text{M} + \text{H}^+]$  calcd for  $\text{C}_{30}\text{H}_{33}\text{N}_2\text{O}_7$ , 533.2288; found, 533.2291.

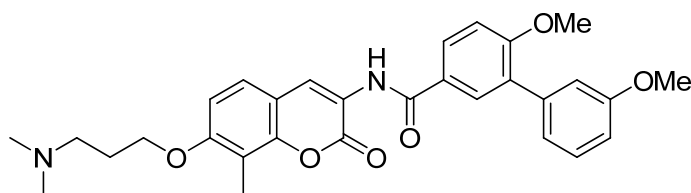

**N-(7-(3-(dimethylamino)propoxy)-8-methyl-2-oxo-2H-chromen-3-yl)-3',6-dimethoxybiphenyl-3-carboxamide (66a).** Compound **66a** was obtained as a light brown amorphous solid (65 mg, 70%).  $^1\text{H}$  NMR (400 MHz,  $\text{CDCl}_3$ )  $\delta$  8.81 (s, 1H), 8.71 (s, 1H), 7.95–7.91 (m, 2H), 7.40–7.34 (m, 2H), 7.15–7.08 (m, 3H), 6.95 (dd,  $J = 8.2, 2.0$  Hz, 1H), 6.89 (d,  $J = 8.7$  Hz, 1H), 4.14 (t,  $J = 6.2$  Hz, 2H), 3.92 (s, 3H), 3.88 (s, 3H), 2.61 (t,  $J = 6.2$  Hz, 2H), 2.37 (s, 6H), 2.34 (s, 3H), 2.11–2.06 (m, 2H).  $^{13}\text{C}$  NMR (100 MHz,  $\text{CDCl}_3$ )  $\delta$  165.5, 159.8, 159.6, 159.3, 158.4, 149.2, 138.6, 131.0, 130.0, 129.2, 128.2, 126.1, 125.7, 124.5, 122.0, 121.5, 115.2, 114.1, 113.4, 113.2, 111.0, 108.9, 66.8, 56.3, 55.9, 55.3, 45.3, 27.2, 8.2. IR (KBr)  $\nu_{\text{max}}$  3400, 2924, 2854, 1708, 1670, 1607, 1528, 1367, 1242, 1205, 1111, 1022  $\text{cm}^{-1}$ . HRMS (ESI $^+$ )  $m/z$ :  $[\text{M} + \text{H}^+]$  calcd for  $\text{C}_{30}\text{H}_{33}\text{N}_2\text{O}_6$ , 517.2339; found, 517.2342.

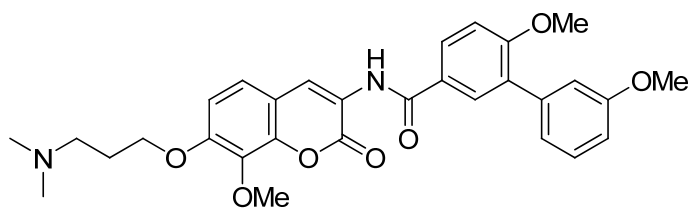

**N-(7-(3-(dimethylamino)propoxy)-8-methoxy-2-oxo-2H-chromen-3-yl)-3',6-dimethoxybiphenyl-3-carboxamide (66b).** Compound **66b** was obtained as a light yellow amorphous solid (36 mg, 72%).  $^1\text{H NMR}$  (400 MHz,  $\text{CDCl}_3$ )  $\delta$  8.79 (s, 1H), 8.70 (s, 1H), 7.92–7.88 (m, 2H), 7.38 (t,  $J = 8.0$  Hz, 1H), 7.22 (d,  $J = 8.0$  Hz, 1H), 7.13–7.06 (m, 3H), 6.94–6.90 (m, 2H), 4.17 (t,  $J = 6.2$  Hz, 2H), 4.02 (s, 3H), 3.92 (s, 3H), 3.86 (s, 3H), 2.65 (t,  $J = 6.2$  Hz, 2H), 2.39 (s, 6H), 2.12 (m, 2H).  $^{13}\text{CNMR}$  (100 MHz,  $\text{CDCl}_3$ )  $\delta$  165.5, 159.8, 159.4, 158.9, 153.4, 144.0, 138.6, 136.5, 131.1, 130.0, 129.2, 128.2, 126.0, 124.0, 122.6, 122.1, 122.0, 115.3, 114.6, 113.2, 111.0, 111.95, 67.5, 61.5, 56.1, 55.9, 55.3, 45.1, 27.0. IR (KBr)  $\nu_{\text{max}}$  3404, 2941, 2837, 1709, 1666, 1602, 1582, 1501, 1462, 1379, 1244, 1207, 1180, 1093  $\text{cm}^{-1}$ . HRMS (ESI $^+$ )  $m/z$ : [ $\text{M} + \text{H}^+$ ] calcd for  $\text{C}_{30}\text{H}_{33}\text{N}_2\text{O}_7$ , 533.2288; found, 533.2291.

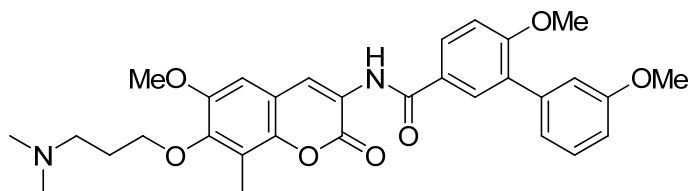

**N-(7-(3-(dimethylamino)propoxy)-6-methoxy-8-methyl-2-oxo-2H-chromen-3-yl)-3',6-dimethoxybiphenyl-3-carboxamide (66c).** Compound **66c** was obtained as a white amorphous solid (57 mg, 76%).  $^1\text{H NMR}$  (400 MHz,  $\text{CDCl}_3$ )  $\delta$  8.78 (s, 1H), 8.75 (s, 1H), 7.92–7.90 (m, 2H), 7.37 (t,  $J = 8.0$  Hz, 1H), 7.14–7.06 (m, 3H), 6.95–6.92 (m, 1H), 6.84 (s, 1H), 4.06 (t,  $J = 6.2$  Hz, 2H), 3.90 (s, 3H), 3.89 (s, 3H), 3.87 (s, 3H), 2.74 (t,  $J = 6.2$  Hz, 2H), 2.44 (s, 6H), 2.39 (s, 3H), 2.11–2.05 (m, 2H).  $^{13}\text{CNMR}$  (100 MHz,  $\text{CDCl}_3$ )  $\delta$  165.5, 159.8, 159.3, 158.30, 158.29, 150.3, 148.0, 143.3, 138.6, 131.0, 130.0, 129.2, 126.0, 123.7, 123.1, 122.0, 120.3, 115.5, 115.3, 113.1,

111.0, 106.5, 71.3, 56.3, 56.0, 55.9, 55.3, 44.9, 27.7, 9.0. IR (KBr)  $\nu_{max}$  3404, 2941, 2837, 1709, 1672, 1603, 1582, 1526, 1501, 1464, 1377, 1242, 1205, 1093, 1034  $\text{cm}^{-1}$ . HRMS (ESI<sup>+</sup>) m/z: [M + H<sup>+</sup>] calcd for C<sub>31</sub>H<sub>35</sub>N<sub>2</sub>O<sub>7</sub>, 547.2444; found, 547.2449.

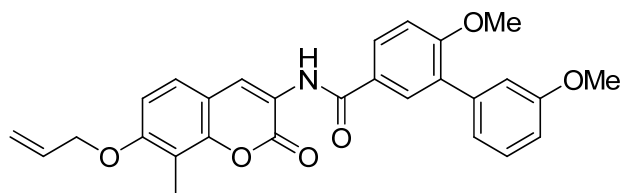

**N-(7-(allyloxy)-8-methyl-2-oxo-2H-chromen-3-yl)-3',6-dimethoxybiphenyl-3-carboxamide (67a).** A solution of compound **6a** (149 mg, 0.35 mmol) in THF (5 mL) was treated with potassium carbonate (238 mg, 1.73 mmol) and allylbromide (84 mg, 0.69 mmol). The resulting mixture was refluxed for 8 h, quenched with aqueous ammonium chloride and extracted with ethyl acetate (3 x 50 mL). The combined organic layers were washed with water and saturated sodium chloride solution, dried over anhydrous magnesium sulfate and concentrated to dryness. The residue was purified via column chromatography (SiO<sub>2</sub>, 40:1, CH<sub>2</sub>Cl<sub>2</sub>:acetone) to give compound **67a** as a white amorphous solid (144 mg, 88%). <sup>1</sup>H NMR (500 MHz, CDCl<sub>3</sub>)  $\delta$  8.77 (s, 1H), 8.70 (s, 1H), 7.92–7.90 (m, 2H), 7.38 (t,  $J = 8.0$  Hz, 1H), 7.32 (d,  $J = 8.0$  Hz, 1H), 7.16–7.12 (m, 2H), 7.06 (d,  $J = 8.0$  Hz, 1H), 6.95 (dd,  $J = 8.0$  Hz, 1.5, 1H), 6.85 (d,  $J = 8.0$  Hz, 1H), 6.61–6.04 (m, 1H), 5.47 (dd,  $J = 7.1, 1.5$  Hz, 1H), 5.33 (dt,  $J = 10.2, 1.1$  Hz, 1H), 4.61 (d,  $J = 5.0$  Hz, 2H), 3.90 (s, 3H), 3.88 (s, 3H), 2.35 (s, 3H). <sup>13</sup>C NMR (125 MHz, CDCl<sub>3</sub>)  $\delta$  165.3, 159.7, 159.5, 159.4, 158.0, 149.2, 138.6, 132.8, 131.0, 130.0, 129.2, 128.1, 126.1, 125.6, 124.2, 122.0, 121.6, 117.6, 115.3, 114.3, 113.5, 113.1, 111.0, 109.2, 69.3, 55.9, 55.3, 8.2. IR (KBr)  $\nu_{max}$  3400, 3085, 3025, 2939, 2835, 1711, 1672, 1605, 1524, 1502, 1462, 1367, 1281, 1246, 1207, 1180, 1103, 1022  $\text{cm}^{-1}$ . HRMS (ESI<sup>+</sup>) m/z calcd for [M+Na<sup>+</sup>] C<sub>28</sub>H<sub>24</sub>NO<sub>6</sub>Na, 494.1580; found, 494.1583.

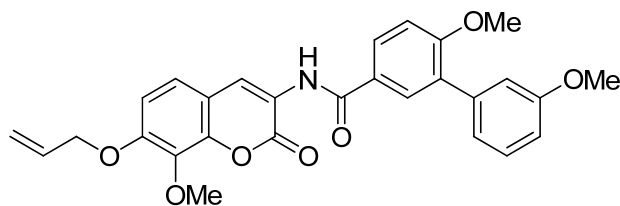

**N-(7-(allyloxy)-8-methoxy-2-oxo-2H-chromen-3-yl)-3',6-dimethoxybiphenyl-3-carboxamide (67b).** A solution of compound **6b** (61 mg, 0.14 mmol) in DMF (5 mL) was treated with sodium hydride (60%, 8.4 mg, 0.21 mmol) and allylbromide (34 mg, 0.28 mmol). The resulting mixture was refluxed for 8 h, quenched with aqueous ammonium chloride and extracted with ethyl acetate (3 x 50 mL). The combined organic layers were washed with water and saturated sodium chloride solution, dried over anhydrous magnesium sulfate and concentrated to dryness. The residue was purified via column chromatography (SiO<sub>2</sub>, 40:1, CH<sub>2</sub>Cl<sub>2</sub>:acetone) to afford compound **67b** as a white amorphous solid (57 mg, 84%). <sup>1</sup>H NMR (500 MHz, CDCl<sub>3</sub>) δ 8.81 (s, 1H), 8.72 (s, 1H), 7.92 (dd, *J* = 8.6, 2.4 Hz, 1H), 7.89 (d, *J* = 2.4 Hz, 1H), 7.37 (t, *J* = 8.0 Hz, 1H), 7.32 (d, *J* = 8.6 Hz, 1H), 7.13 (td, *J* = 7.6, 1.0 Hz, 1H), 7.10–7.08 (m, 1H), 7.07 (d, *J* = 8.6 Hz, 1H), 6.95–6.92 (m, 2H), 6.13–6.05 (m, 1H), 5.46 (dd, *J* = 7.2, 1.5 Hz, 1H), 5.34 (dt, *J* = 5.0, 1.1 Hz, 1H), 4.69 (dd, *J* = 5.0, 1.0 Hz, 2H), 4.02 (s, 1H), 3.91 (s, 3H), 3.87 (s, 3H). <sup>13</sup>C NMR (125 MHz, CDCl<sub>3</sub>) δ 165.8, 160.0, 159.5, 159.1, 153.2, 144.2, 138.8, 136.8, 132.8, 131.3, 130.2, 129.4, 128.4, 126.2, 124.2, 122.7, 122.4, 122.2, 118.5, 115.5, 114.9, 113.4, 111.5, 111.2, 70.3, 61.8, 56.1, 55.5. IR (KBr) *v*<sub>max</sub> 3400, 3084, 3000, 2937, 2835, 1713, 1672, 1607, 1526, 1502, 1462, 1367, 1283, 1245, 1207, 1103, 1022 cm<sup>-1</sup>. HRMS (ESI<sup>+</sup>) *m/z* calcd for [M+Na<sup>+</sup>] C<sub>28</sub>H<sub>25</sub>NO<sub>7</sub>Na, 510.1529; found, 510.1521.

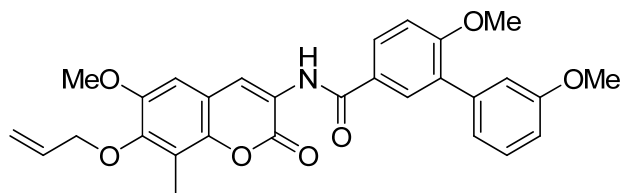

**N-(7-(allyloxy)-6-methoxy-8-methyl-2-oxo-2H-chromen-3-yl)-3',6-dimethoxybiphenyl-3-carboxamide (67c).** Compound **67c** was obtained as a white amorphous solid (34 mg, 76%).  $^1\text{H}$  NMR (500 MHz,  $\text{CDCl}_3$ )  $\delta$  8.77 (s, 1H), 8.74 (s, 1H), 7.90 (dd,  $J = 10.8, 2.3$  Hz, 1H), 7.88 (d,  $J = 2.3$  Hz, 1H), 7.34 (t,  $J = 10.8$  Hz, 1H), 7.11 (d,  $J = 7.6$  Hz, 1H), 7.08 (s, 1H), 7.05 (d,  $J = 8.5$ , Hz, 1H), 6.92 (d,  $J = 8.5$ , 1H), 6.83 (s, 1H), 6.12–6.04 (m, 1H), 5.35 (d,  $J = 7.2, 1.5$  Hz, 1H), 5.23 (d,  $J = 10.3$  Hz, 1H), 4.54 (dd,  $J = 6.0, 1.0$  Hz, 2H), 3.89 (s, 1H), 3.88 (s, 3H), 3.84 (s, 3H), 2.37 (s, 3H).  $^{13}\text{C}$  NMR (125 MHz,  $\text{CDCl}_3$ )  $\delta$  165.8, 160.0, 159.6, 159.5, 150.6, 148.0, 143.5, 138.8, 134.0, 131.2, 130.2, 129.4, 128.4, 126.2, 123.9, 123.2, 122.2, 120.8, 118.4, 115.7, 115.5, 113.3, 111.2, 106.7, 74.4, 56.2, 56.1, 55.5, 9.4. IR (KBr)  $\nu_{\text{max}}$  3402, 3084, 3002, 2939, 2835, 1713, 1670, 1605, 1526, 1502, 1462, 1367, 1283, 1246, 1207, 1103, 1022  $\text{cm}^{-1}$ . HRMS (ESI $^+$ )  $m/z$  calcd for  $[\text{M}+\text{Na}^+]$   $\text{C}_{29}\text{H}_{27}\text{NO}_7\text{Na}$ , 524.1685; found, 524.1684.

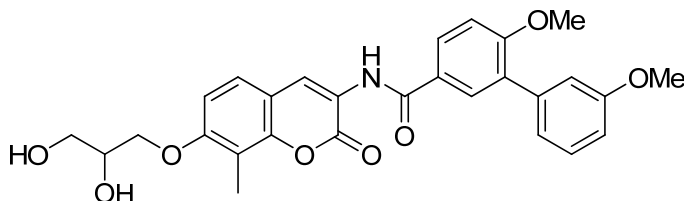

**N-(7-(2,3-Dihydroxypropoxy)-8-methyl-2-oxo-2H-chromen-3-yl)-3',6-dimethoxybiphenyl-3-carboxamide (68a).** Compound **68a** was obtained as a white amorphous powder (58 mg, 90%).  $^1\text{H}$  NMR (400 MHz,  $\text{CDCl}_3$ )  $\delta$  8.82 (s, 1H), 8.72 (s, 1H), 7.95–7.91 (m, 2H), 7.41–7.36 (m, 2H), 7.16–7.08 (m, 3H), 6.97–6.90 (m, 2H), 4.22–4.16 (m, 3H), 3.99 (s, 3H), 3.92 (s, 3H), 3.91–3.81 (2H), 2.59 (s, 1H), 2.36 (s, 3H), 2.02 (s, 1H).  $^{13}\text{C}$  NMR (100 MHz,  $\text{CDCl}_3$ )  $\delta$  165.6, 159.5, 159.4, 158.9, 158.8, 150.0, 139.2, 130.4, 129.8, 129.6, 129.5, 129.3, 126.7, 126.2, 122.2, 121.5, 115.7, 113.1, 113.0 (2C), 112.0, 109.6, 70.9, 70.4, 63.1, 56.4, 55.6, 8.4. IR (KBr)  $\nu_{\text{max}}$  3256 (broad), 3030, 2980, 2939, 1735, 1691, 1526, 1382, 1256, 1178, 1109, 1051, 1020  $\text{cm}^{-1}$ . HRMS (ESI $^+$ )  $m/z$ :  $[\text{M} + \text{Na}^+]$  calcd for  $\text{C}_{28}\text{H}_{27}\text{NO}_8\text{Na}$ , 528.1634; found, 528.1630.

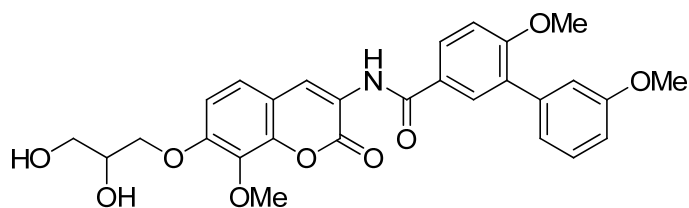

**N-(7-(2,3-dihydroxypropoxy)-8-methoxy-2-oxo-2H-chromen-3-yl)-3',6-dimethoxybiphenyl-3-carboxamide (68b).** Compound **68b** was obtained as a white amorphous powder (26 mg, 74%).  $^1\text{H}$  NMR (500 MHz,  $\text{DMSO-}d_6$ )  $\delta$  9.68 (s, 1H), 8.48 (s, 1H), 7.99 (dd,  $J = 8.6, 2.3$  Hz, 1H), 7.92 (d,  $J = 2.3$  Hz, 1H), 7.45 (d,  $J = 8.8$  Hz, 1H), 7.37 (t,  $J = 7.9$  Hz, 1H), 7.26 (d,  $J = 8.6$ , 1H), 7.12 (t,  $J = 8.8$  Hz, 1H), 7.10 (d,  $J = 2.6$  Hz, 1H), 6.96 (dd,  $J = 8.3, 2.1$  Hz, 1H), 5.05 (bs, 1H), 4.73 (t,  $J = 5.7$  Hz, 1H), 4.15 (dd,  $J = 10.0, 4.1$  Hz, 1H), 4.04 (dd,  $J = 10.0, 2.2$  Hz, 1H), 3.87 (s, 3H), 3.86 (s, 3H), 3.79 (s, 3H), 3.50 (t,  $J = 5.6$  Hz, 2H).  $^{13}\text{C}$  NMR (125 MHz,  $\text{DMSO-}d_6$ )  $\delta$  165.1, 159.1, 158.9, 157.9, 153.6, 144.2, 138.7, 135.3, 130.0, 129.3, 129.2, 129.1 (2C), 125.7, 122.9, 121.7, 121.5, 115.2, 113.6, 112.5, 111.5, 110.8, 70.7, 69.8, 62.6, 60.8, 55.9, 55.1. IR (KBr)  $\nu_{\text{max}}$  3294 (broad), 2982, 2937, 1711, 1678, 1538, 1502, 1468, 1375, 1232, 1109, 1047, 1020  $\text{cm}^{-1}$ . HRMS (ESI $^+$ )  $m/z$ :  $[\text{M} + \text{Na}^+]$  calcd for  $\text{C}_{28}\text{H}_{27}\text{NO}_9\text{Na}$ , 544.1583; found, 544.1581.

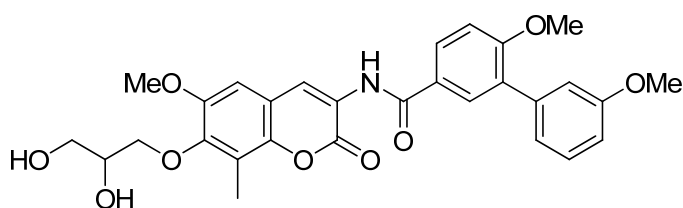

**N-(7-(2,3-dihydroxypropoxy)-6-methoxy-8-methyl-2-oxo-2H-chromen-3-yl)-3',6-dimethoxybiphenyl-3-carboxamide (68c).** Compound **68c** was obtained as a white amorphous powder (18 mg, 67%).  $^1\text{H}$  NMR (500 MHz,  $\text{DMSO-}d_6$ )  $\delta$  9.65 (s, 1H), 8.54 (s, 1H), 8.00 (dd,  $J = 8.7, 2.4$  Hz, 1H), 7.91 (d,  $J = 2.4$  Hz, 1H), 7.37 (t,  $J = 7.9$  Hz, 1H), 7.29 (s, 1H), 7.26 (d,  $J = 8.8$  Hz, 1H), 7.12–7.09 (m, 2H), 6.96 (dd,  $J = 8.6, 2.6$  Hz, 1H), 4.89 (s, OH, 1H), 4.62 (t,  $J = 5.7$  Hz,

1H), 4.05 (dd,  $J = 10.0, 4.2$ , 1H), 3.98–3.92 (m, 1H), 3.86 (s, 3H), 3.85 (s, 3H), 3.80 (s, 3H), 3.79–3.74 (m, 1H), 3.44 (t,  $J = 5.6$  Hz, 2H). 2.31 (s, 3H).  $^{13}\text{C}$  NMR (125 MHz, DMSO- $d_6$ )  $\delta$  165.2, 159.1, 159.0, 158.2, 149.6, 148.1, 143.5, 138.7, 130.0, 129.4, 129.1 (2C), 128.1, 125.7, 122.6, 121.7, 119.0, 115.2, 114.6, 112.6, 111.6, 107.6, 75.0, 70.7, 62.9, 56.1, 55.9, 55.1, 8.8. IR (KBr)  $\nu_{\text{max}}$  3284 (broad), 2980, 2842, 1709, 1694, 1524, 1483, 1375, 1251, 1178, 1146, 1109, 1051, 1020  $\text{cm}^{-1}$ . HRMS (ESI $^+$ )  $m/z$ :  $[\text{M} + \text{Na}^+]$  calcd for  $\text{C}_{29}\text{H}_{29}\text{NO}_9\text{Na}$ , 558.1740; found, 558.1733.

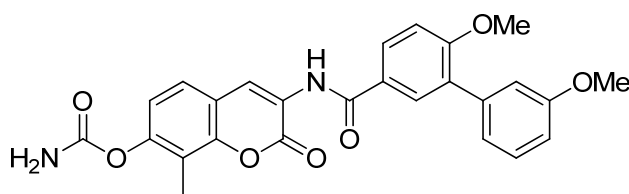

**3-(3',6-dimethoxy-[1,1'-biphenyl]-3-ylcarboxamido)-8-methyl-2-oxo-2H-chromen-7-yl**

**carbamate (69a):** A solution of sulfurisocyanatidic chloride (6.0  $\mu\text{L}$ , 0.070 mmol), dissolved in anhydrous  $\text{CH}_2\text{Cl}_2$  (0.20 mL), was slowly added to **6a**<sup>3</sup> (30 mg, 0.070 mmol) in anhydrous  $\text{CH}_2\text{Cl}_2$  (1.20 mL) at rt. After 2 h, the solvent was removed and the residue was stirred with cold  $\text{H}_2\text{O}$  overnight. The solid was collected by filtration, washing with  $\text{H}_2\text{O}$ , and thoroughly dried to afford **69a** as a yellow amorphous solid (19 mg, 56%):  $^1\text{H}$  NMR (DMSO- $d_6$ , 500 MHz)  $\delta$  9.77 (s, 1H), 8.59 (s, 1H), 8.01 (dd,  $J = 9.0, 2.5$  Hz, 1H), 7.93 (d,  $J = 2.5$  Hz, 1H), 7.62 (d,  $J = 8.5$  Hz, 1H), 7.43 (bs, 1H), 7.37 (t,  $J = 8.0$  Hz, 1H), 7.27 (d,  $J = 9.0$  Hz, 1H), 7.14–7.09 (m, 4H), 6.97–6.94 (m, 1H), 3.87 (s, 3H), 3.80 (s, 3H), 2.21 (s, 3H);  $^{13}\text{C}$  NMR (DMSO- $d_6$ , 125 MHz)  $\delta$  168.5, 165.3, 159.2, 159.0, 154.2, 149.1, 138.7, 136.7, 130.1, 129.4, 129.3, 129.2, 127.9, 125.7, 125.6, 123.2, 121.8, 119.8, 118.4, 116.6, 115.3, 112.6, 111.6, 56.0, 55.2, 8.7; IR (film)  $\nu_{\text{max}}$  3053, 2986, 2305, 1713, 1603, 1522, 1421, 1367, 1265, 897, 748; HRMS (ESI $^+$ )  $m/z$ :  $[\text{M} + 2\text{H}^+]$  calcd for  $\text{C}_{26}\text{H}_{24}\text{N}_2\text{O}_7$ , 476.1584; found, 476.1514.



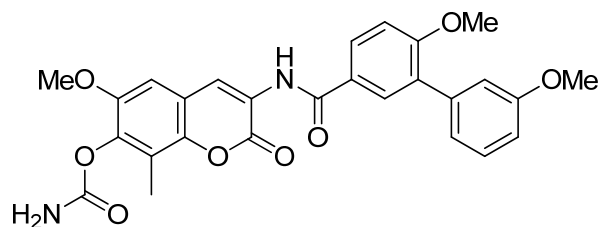

**3-(3',6-dimethoxy-[1,1'-biphenyl]-3-ylcarboxamido)-6-methoxy-8-methyl-2-oxo-2H-chromen-7-yl carbamate (69b):** A solution of sulfurisocyanatidic chloride (3.8  $\mu\text{L}$ , 0.043 mmol), dissolved in anhydrous  $\text{CH}_2\text{Cl}_2$  (0.12 mL), was slowly added to **6b** (20 mg, 0.043 mmol) in anhydrous  $\text{CH}_2\text{Cl}_2$  (0.75 mL) at rt. After 2 h, the solvent was removed and the residue was stirred with cold  $\text{H}_2\text{O}$  overnight. The solid was collected by filtration, washing with  $\text{H}_2\text{O}$ , and thoroughly dried to afford **69b** as a yellow amorphous solid (11 mg, 50%):  $^1\text{H}$  NMR ( $\text{CDCl}_3$ , 500 MHz)  $\delta$  8.81 (s, 1H), 8.78 (s, 1H), 7.92 (dd,  $J = 8.5, 2.5$  Hz, 1H), 7.90 (d,  $J = 2.5$  Hz, 1H), 7.37 (t,  $J = 8.0$  Hz, 1H), 7.14–7.07 (m, 4H), 6.95–6.93 (m, 1H), 6.91 (s, 1H), 3.90 (s, 6H), 3.86 (s, 3H), 2.36 (s, 3H);  $^{13}\text{C}$  NMR ( $\text{CDCl}_3$ , 125 MHz)  $\delta$  165.8, 160.0, 159.5, 159.2, 153.8, 149.6, 142.8, 139.7, 138.7, 131.2, 130.2, 129.3, 128.4, 126.1, 124.1, 123.3, 122.1, 121.3, 117.8, 115.4, 113.3, 111.1, 106.6, 56.5, 56.0, 55.5, 9.2; IR (film)  $\nu_{\text{max}}$  3053, 2986, 2684, 2305, 1421, 1265, 895, 750, 706; HRMS (ESI $^+$ )  $m/z$ :  $[\text{M} + 2\text{H}^+]$  calcd for  $\text{C}_{27}\text{H}_{26}\text{N}_2\text{O}_8$ , 506.1689; found, 506.1637.

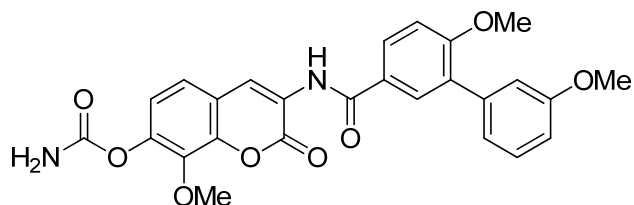

**3-(3',6-dimethoxy-[1,1'-biphenyl]-3-ylcarboxamido)-8-methoxy-2-oxo-2H-chromen-7-yl carbamate (69c):** A solution of sulfurisocyanatidic chloride (11  $\mu\text{L}$ , 0.13 mmol), dissolved in anhydrous  $\text{CH}_2\text{Cl}_2$  (0.4 mL), was slowly added to **6c** (30 mg, 0.066 mmol) in anhydrous  $\text{CH}_2\text{Cl}_2$  (1.6 mL) at rt. After 2 h, the solvent was removed and the residue was stirred with cold  $\text{H}_2\text{O}$

overnight. The solid was collected by filtration, washing with H<sub>2</sub>O, and thoroughly dried to afford **69c** as a colorless amorphous solid (22 mg, 68%): <sup>1</sup>H NMR (DMSO-*d*<sub>6</sub>, 500 MHz) δ 9.78 (s, 1H), 8.58 (s, 1H), 8.01 (dd, *J* = 8.5, 2.5 Hz, 1H), 7.93 (d, *J* = 2.5 Hz, 1H), 7.49 (d, *J* = 8.5 Hz, 1H), 7.46 (bs, 1H), 7.37 (t, *J* = 8.0 Hz, 1H), 7.27 (d, *J* = 8.5 Hz, 1H), 7.16–7.10 (m, 4H), 6.97–6.94 (m, 1H), 3.91 (s, 3H), 3.87 (s, 3H), 3.80 (s, 3H); <sup>13</sup>C NMR (CDCl<sub>3</sub>, 125 MHz) δ 165.8, 160.1, 159.5, 158.4, 154.1, 144.3, 143.7, 140.0, 138.7, 131.3, 130.1, 129.3, 128.4, 125.9, 123.9, 123.2, 122.2, 122.1, 120.3, 119.3, 115.4, 113.3, 111.2, 62.0, 56.1, 55.5; IR (film) *v*<sub>max</sub> 3406, 3271, 3053, 2986, 2359, 2339, 1715, 1672, 1603, 1531, 1502, 1366, 1265, 1082, 897, 737, 704; HRMS (ESI<sup>+</sup>) *m/z*: [M + H<sup>+</sup>] calcd for C<sub>26</sub>H<sub>23</sub>N<sub>2</sub>O<sub>8</sub>, 491.1454; found, 491.1432.

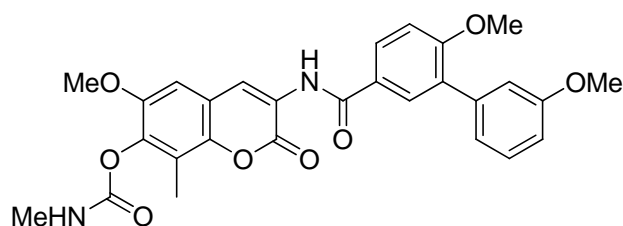

**3-(3',6-dimethoxy-[1,1'-biphenyl]-3-ylcarboxamido)-6-methoxy-8-methyl-2-oxo-2H-chromen-7-yl methylcarbamate (70b):** A solution of **6b** (20 mg, 0.043 mmol) in anhydrous pyridine (2.1 mL) was treated with methylcarbamic chloride (4.4 mg). After 12 h, the solvent was removed and the residue purified via column chromatography (SiO<sub>2</sub>, 40:1, CH<sub>2</sub>Cl<sub>2</sub>:acetone) to afford **70b** as a yellow amorphous solid (21 mg, 95%): <sup>1</sup>H NMR (CDCl<sub>3</sub>, 500 MHz) δ 8.79 (s, 1H), 8.71 (s, 1H), 7.92 (dd, *J* = 8.5, 2.5 Hz, 1H), 7.89 (d, *J* = 2.5 Hz, 1H), 7.37 (t, *J* = 8.0 Hz, 1H), 7.13–7.06 (m, 3H), 6.95–6.92 (m, 1H), 6.81 (s, 1H), 6.11 (s, 1H), 3.96 (s, 3H), 3.90 (s, 3H), 3.86 (s, 3H), 3.37 (s, 3H), 2.37 (s, 3H); <sup>13</sup>C NMR (CDCl<sub>3</sub>, 125 MHz) δ 165.7, 159.9, 159.7, 159.4, 146.1, 144.5, 144.2, 138.7 (2C), 131.1, 130.1, 129.3, 128.3, 126.3, 124.7, 122.1, 122.0, 115.4, 113.3, 112.2, 111.9, 111.1, 105.0, 56.4, 56.0, 55.5, 29.6, 8.3; IR (film) *v*<sub>max</sub> 3053, 2986,

2685, 2359, 2341, 2307, 1684, 1421, 1265, 1022, 897, 746, 704; HRMS (ESI<sup>+</sup>) *m/z*: [M + H<sup>+</sup>] calcd for C<sub>28</sub>H<sub>27</sub>N<sub>2</sub>O<sub>8</sub>, 519.1767; found, 519.1839.

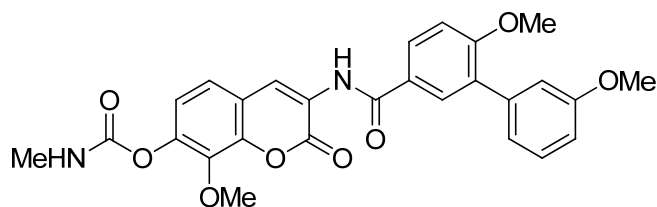

**3-(3',6-dimethoxy-[1,1'-biphenyl]-3-ylcarboxamido)-8-methoxy-2-oxo-2H-chromen-7-yl methylcarbamate (70c):** A solution of **6c** (33 mg, 0.074 mmol) in anhydrous pyridine (3.5 mL) was treated with methylcarbamic chloride (7.4 mg). After 12 h, the solvent was removed and the residue purified via column chromatography (SiO<sub>2</sub>, 40:1, CH<sub>2</sub>Cl<sub>2</sub>:acetone) to afford **70c** as a yellow amorphous solid (34 mg, 90%): <sup>1</sup>H NMR (CDCl<sub>3</sub>, 500 MHz) δ 8.81 (s, 1H), 8.65 (bs, 1H), 7.97 (bs, 1H), 7.92 (dd, *J* = 8.5, 2.5 Hz, 1H), 7.88 (d, *J* = 2.5 Hz, 1H), 7.37 (t, *J* = 8.0 Hz, 1H), 7.18 (d, *J* = 8.5 Hz, 1H), 7.13–7.07 (m, 3H), 6.96 (d, *J* = 8.5 Hz, 1H), 6.95–6.93 (m, 1H), 4.12 (s, 3H), 3.90 (s, 3H), 3.86 (s, 3H); <sup>13</sup>C NMR (CDCl<sub>3</sub>, 125 MHz) δ 165.7, 160.0, 159.5, 158.7, 150.4, 143.1, 141.6, 138.7, 133.7, 131.2, 130.1, 129.3, 128.3, 126.1, 124.8, 123.3, 122.1, 121.7, 115.4, 114.1, 113.3, 113.1, 111.2, 62.1, 56.0, 55.5, 29.9; IR (film) *v*<sub>max</sub> 3030, 2851, 2284, 1693, 1668, 1599, 1520, 1495, 1487, 1371, 1342, 1231, 1161, 1078, 964, 901, 856, 795; HRMS (ESI<sup>+</sup>) *m/z*: [M + Na<sup>+</sup>] calcd for C<sub>27</sub>H<sub>24</sub>N<sub>2</sub>NaO<sub>8</sub>, 527.1430; found, 527.1403.

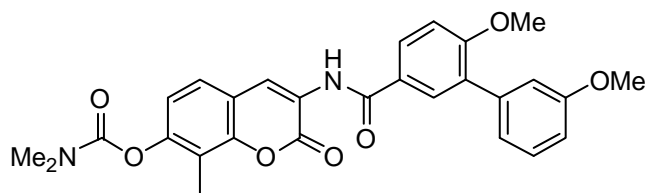

**3-(3',6-dimethoxy-[1,1'-biphenyl]-3-ylcarboxamido)-8-methyl-2-oxo-2H-chromen-7-yl dimethylcarbamate (71a):** A solution of **6a** (30 mg, 0.070 mmol) in pyridine (3.0 mL) at rt was

treated with dimethylcarbonyl chloride (1.0 mL). After 12 h, the solvent was removed and the residue purified via column chromatography (SiO<sub>2</sub>, 40:1, CH<sub>2</sub>Cl<sub>2</sub>:acetone) to afford **71a** as a colorless amorphous solid (31 mg, 89%): <sup>1</sup>H NMR (CDCl<sub>3</sub>, 500 MHz) δ 8.84 (s, 1H), 8.75 (s, 1H), 7.93 (dd, *J* = 8.5, 2.5 Hz, 1H), 7.90 (d, *J* = 2.0 Hz, 1H), 7.40–7.35 (m, 2H), 7.14–7.07 (m, 4H), 6.95–6.92 (m, 1H), 3.91 (s, 3H), 3.86 (s, 3H), 3.17 (s, 3H), 3.05 (s, 3H), 2.34 (s, 3H); <sup>13</sup>C NMR (CDCl<sub>3</sub>, 125 MHz) δ 165.8, 160.0, 159.5, 159.3, 154.2, 151.0, 148.9, 138.7, 131.2, 130.1, 129.3, 128.4, 126.1, 125.5, 123.6, 123.5, 122.2, 119.9, 119.3, 117.4, 115.4, 113.3, 111.2, 56.1, 55.5, 37.0, 36.7, 9.1; IR (film)  $\nu_{max}$  3053, 2986, 2305, 1724, 1421, 1265, 1163, 895, 746, 706; HRMS (ESI<sup>+</sup>) *m/z*: [M + 2H<sup>+</sup>] calcd for C<sub>28</sub>H<sub>28</sub>N<sub>2</sub>O<sub>7</sub>, 504.1897; found, 504.1822.

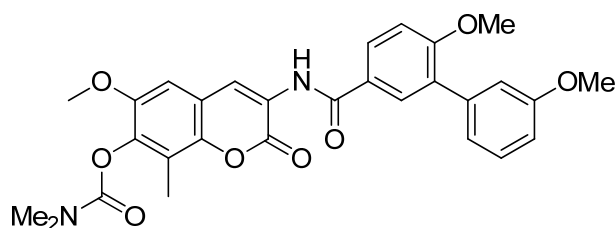

**3-(3',6-dimethoxy-[1,1'-biphenyl]-3-ylcarboxamido)-6-methoxy-8-methyl-2-oxo-2H-chromen-7-yl dimethylcarbamate (71b):** A solution of **6b** (25 mg, 0.054 mmol) in pyridine (2.25 mL) at rt was treated with dimethylcarbonyl chloride (0.75 mL). After 12 h, the solvent was removed and the residue purified via column chromatography (SiO<sub>2</sub>, 40:1, CH<sub>2</sub>Cl<sub>2</sub>:acetone) to afford **71b** as a yellow amorphous solid (25 mg, 85%): <sup>1</sup>H NMR (CDCl<sub>3</sub>, 500 MHz) δ 8.81 (s, 1H), 8.77 (s, 1H), 7.92 (dd, *J* = 8.5, 2.5 Hz, 1H), 7.90 (d, *J* = 2.5 Hz, 1H), 7.37 (t, *J* = 8.0 Hz, 1H), 7.14–7.07 (m, 3H), 6.95–6.92 (m, 1H), 6.89 (s, 1H), 3.90 (s, 3H), 3.88 (s, 3H), 3.86 (s, 3H), 3.18 (s, 3H), 3.04 (s, 3H), 2.34 (s, 3H); <sup>13</sup>C NMR (CDCl<sub>3</sub>, 125 MHz) δ 165.7, 160.0, 159.5, 159.3, 154.0, 149.7, 143.0, 140.8, 138.7, 131.2, 130.2, 129.3, 128.4, 126.1, 123.9, 123.6, 122.2, 121.1, 117.3, 115.4, 113.3, 111.1, 106.5, 56.5, 56.0, 55.5, 37.1, 36.8, 9.3; IR (film)  $\nu_{max}$  3053,

2986, 2305, 1724, 1713, 1672, 1603, 1522, 1501, 1421, 1383, 1267, 1163, 897, 739, 704; HRMS (ESI<sup>+</sup>) *m/z*: [M + H<sup>+</sup>] calcd for C<sub>29</sub>H<sub>29</sub>N<sub>2</sub>O<sub>8</sub>, 533.1924; found, 533.1841.

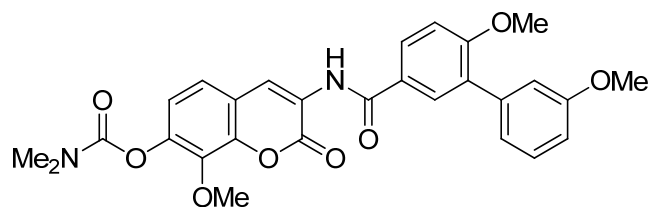

**3-(3',6-dimethoxy-[1,1'-biphenyl]-3-ylcarboxamido)-8-methoxy-2-oxo-2H-chromen-7-yl dimethylcarbamate (71c):** A solution of **6c** (25 mg, 0.056 mmol) in pyridine (2.25 mL) at rt was treated with dimethylcarbonyl chloride (0.75 mL). After 12 h, the solvent was removed and the residue purified via column chromatography (SiO<sub>2</sub>, 40:1, CH<sub>2</sub>Cl<sub>2</sub>:acetone) to afford **71c** as a colorless amorphous solid (19 mg, 65%): <sup>1</sup>H NMR (CDCl<sub>3</sub>, 500 MHz) δ 8.84 (s, 1H), 8.74 (s, 1H), 7.92 (dd, *J* = 8.5, 2.5 Hz, 1H), 7.90 (d, *J* = 2.5 Hz, 1H), 7.38–7.35 (m, 2H), 7.13–7.07 (m, 4H), 6.95–6.93 (m, 1H), 4.05 (s, 3H), 3.91 (s, 3H), 3.86 (s, 3H), 3.16 (s, 3H), 3.05 (s, 3H); <sup>13</sup>C NMR (CDCl<sub>3</sub>, 125 MHz) δ 165.8, 160.0, 158.6, 156.5, 153.0, 149.9, 145.5, 144.0, 142.6, 140.0, 135.6, 130.1, 129.3, 128.4 (2C), 126.0, 123.5, 122.1, 120.5, 118.9, 115.4, 113.3, 111.2, 61.9, 56.0, 55.5, 36.8 (2C); IR (film) *v*<sub>max</sub> 3053, 2986, 2930, 2685, 2305, 1603, 1421, 1265, 1157, 1024, 895, 737, 704; HRMS (ESI<sup>+</sup>) *m/z*: [M + H<sup>+</sup>] calcd for C<sub>28</sub>H<sub>27</sub>N<sub>2</sub>O<sub>8</sub>, 519.1767; found, 519.1750.

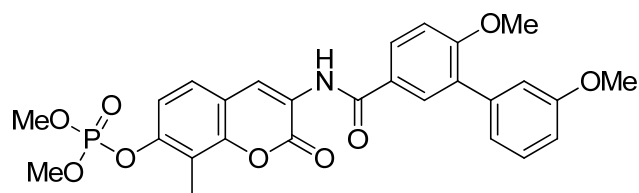

**3-(3',6-dimethoxy-[1,1'-biphenyl]-3-ylcarboxamido)-8-methyl-2-oxo-2H-chromen-7-yl dimethyl phosphate (72a):** Dimethyl phosphorochloridate (6.3 μL, 0.058 mmol) was slowly added to **6a** (25 mg, 0.058 mmol) and 4-dimethylaminopyridine (7.1 mg, 0.058 mmol) in

anhydrous CH<sub>2</sub>Cl<sub>2</sub> (1.2 mL) at rt. After 12 h, the solvent was removed and the residue purified via column chromatography (SiO<sub>2</sub>, 40:1 → 10:1 CH<sub>2</sub>Cl<sub>2</sub>:acetone) to afford **72a** as a colorless amorphous solid (17 mg, 54%): <sup>1</sup>H NMR (CDCl<sub>3</sub>, 500 MHz) δ 8.83 (s, 1H), 8.74 (s, 1H), 7.93 (dd, *J* = 8.5, 2.5 Hz, 1H), 7.89 (d, *J* = 2.0 Hz, 1H), 7.39–7.36 (m, 2H), 7.32 (d, *J* = 9.0 Hz, 1H), 7.13–7.07 (m, 3H), 6.95–6.93 (m, 1H), 3.92 (s, 3H), 3.91 (s, 3H), 3.90 (s, 3H), 3.86 (s, 3H), 2.44 (s, 3H); <sup>13</sup>C NMR (CDCl<sub>3</sub>, 125 MHz) δ 165.7, 160.0, 159.5, 159.1, 149.9, 149.8, 149.0, 138.7, 131.2, 130.1, 129.3, 128.4, 125.9, 125.8, 123.5, 123.3, 122.1, 118.1, 117.2, 115.4, 113.3, 111.2, 56.0, 55.5, 55.3 (2C), 9.0; IR (film) *v*<sub>max</sub> 3404, 3053, 2986, 2930, 2854, 2305, 1715, 1674, 1605, 1522, 1501, 1421, 1366, 1265, 1055, 897, 725, 704; HRMS (ESI<sup>+</sup>) *m/z*: [M + 2H<sup>+</sup>] calcd for C<sub>27</sub>H<sub>28</sub>NO<sub>9</sub>P, 541.1502; found, 541.1454.

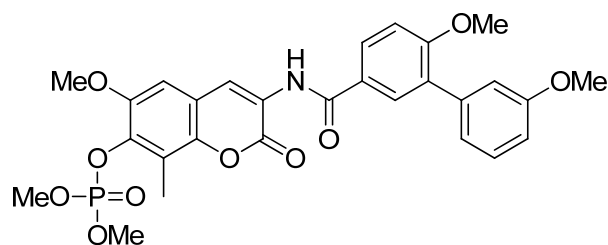

**3-(3',6-dimethoxy-[1,1'-biphenyl]-3-ylcarboxamido)-6-methoxy-8-methyl-2-oxo-2H-chromen-7-yl dimethyl phosphate (72b):** Dimethyl phosphorochloridate (7.0 μL, 0.065 mmol) was slowly added to **6b** (30 mg, 0.065 mmol) and 4-dimethylaminopyridine (8 mg, 0.065 mmol) in anhydrous CH<sub>2</sub>Cl<sub>2</sub> (1.3 mL) at rt. After 12 h, the solvent was removed and the residue purified via column chromatography (SiO<sub>2</sub>, 40:1 → 10:1 CH<sub>2</sub>Cl<sub>2</sub>:acetone) to afford **72b** as a colorless amorphous solid (14 mg, 41%): <sup>1</sup>H NMR (CDCl<sub>3</sub>, 500 MHz) δ 8.79 (s, 1H), 8.77 (s, 1H), 7.92 (dd, *J* = 8.5, 2.5 Hz, 1H), 7.89 (d, *J* = 2.5 Hz, 1H), 7.37 (t, *J* = 8.0 Hz, 1H), 7.13–7.06 (m, 3H), 6.94–6.92 (m, 1H), 6.90 (s, 1H), 3.95 (s, 3H), 3.93 (s, 3H), 3.93 (s, 3H), 3.90 (s, 3H), 3.86 (s, 3H), 2.46 (s, 3H); <sup>13</sup>C NMR (CDCl<sub>3</sub>, 125 MHz) δ 165.8, 160.0, 159.5, 159.2, 148.9 (2C), 138.7,

131.2, 130.2, 129.3, 128.4, 126.0, 124.0, 123.2, 122.1, 120.4, 117.1 (2C), 115.4, 113.3, 111.1, 106.9, 56.5, 56.0, 55.5, 55.3, 55.2, 9.7; IR (film)  $\nu_{max}$  3053, 2986, 2685, 2305, 1713, 1522, 1501, 1421, 1385, 1265, 897, 746, 704; HRMS (ESI<sup>+</sup>)  $m/z$ : [M + Na<sup>+</sup>] calcd for C<sub>28</sub>H<sub>28</sub>NNaO<sub>10</sub>P, 592.1349; found, 592.1341.

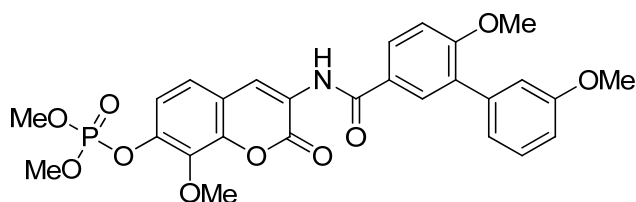

### 3-(3',6-dimethoxy-[1,1'-biphenyl]-3-ylcarboxamido)-8-methoxy-2-oxo-2H-chromen-7-yl

**dimethyl phosphate (72c):** Dimethyl phosphorochloridate (4.0  $\mu$ L, 0.038 mmol) was slowly added to **6c** (17 mg, 0.038 mmol) and 4-dimethylaminopyridine (5 mg, 0.038 mmol) in anhydrous CH<sub>2</sub>Cl<sub>2</sub> (0.8 mL) at rt. After 12 h, the solvent was removed and the residue purified via column chromatography (SiO<sub>2</sub>, 40:1) to afford **72c** as a yellow amorphous solid (6.0 mg, 30%): <sup>1</sup>H NMR (CDCl<sub>3</sub>, 500 MHz)  $\delta$  8.82 (s, 1H) 8.74 (s, 1H), 7.92 (dd,  $J$  = 8.5, 2.5 Hz, 1H), 7.88 (d,  $J$  = 2.5 Hz, 1H), 7.37 (t,  $J$  = 8.0 Hz, 1H), 7.29 (dd,  $J$  = 8.5, 1.0 Hz, 1H), 7.25–7.23 (m, 1H), 7.13–7.07 (m, 3H), 6.95–6.93 (m, 1H) 4.09 (s, 3H), 3.94 (s, 3H), 3.92 (s, 3H), 3.91 (s, 3H), 3.86 (s, 3H); <sup>13</sup>C NMR (CDCl<sub>3</sub>, 125 MHz)  $\delta$  165.7, 160.1, 159.5, 158.4, 144.4, 144.0, 138.6, 131.3, 130.1, 129.3, 128.4, 125.8, 123.8, 123.1, 122.4, 122.1, 118.6, 118.5, 118.4, 115.4, 113.3, 111.2, 62.2, 56.0, 55.5, 55.3 (2C); IR (film)  $\nu_{max}$  3053, 2959, 2928, 2854, 2361, 2307, 1718, 1674, 1605, 1522, 1501, 1462, 1366, 1265, 1207, 1180, 1038, 1024, 916, 858, 735, 704; HRMS (ESI<sup>+</sup>)  $m/z$ : [M + Na<sup>+</sup>] calcd for C<sub>27</sub>H<sub>26</sub>NNaO<sub>10</sub>P, 578.1192; found, 578.1147.

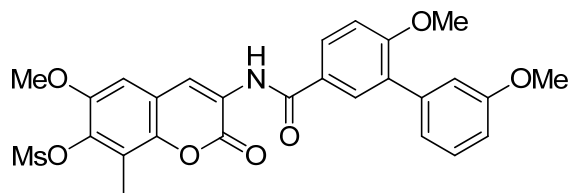

**3-(3',6-dimethoxy-[1,1'-biphenyl]-3-ylcarboxamido)-6-methoxy-8-methyl-2-oxo-2H-chromen-7-yl methanesulfonate (73b):** Methanesulfonyl chloride (10  $\mu$ L, 0.13 mmol) was added to **6b** (15 mg, 0.033 mmol) in anhydrous pyridine (0.20 mL) at 0° C. The resulting solution was warmed to rt and stirred overnight, then diluted with H<sub>2</sub>O. The desired product was extracted with EtOAc (3  $\times$  10 mL); combined organic fractions were dried (Na<sub>2</sub>SO<sub>4</sub>), filtered, and concentrated. The residue was purified via column chromatography (SiO<sub>2</sub>, 40:1, CH<sub>2</sub>Cl<sub>2</sub>:acetone) to afford **73b** as a yellow amorphous solid (13 mg, 97%): <sup>1</sup>H NMR (DMSO-*d*<sub>6</sub>, 500 MHz)  $\delta$  9.77 (s, 1H), 8.64 (s, 1H), 8.01 (dd, *J* = 8.5, 2.5 Hz, 1H), 7.92 (d, *J* = 2.5 Hz, 1H), 7.49 (s, 1H), 7.37 (t, *J* = 8.0 Hz, 1H), 7.27 (d, *J* = 9.0 Hz, 1H), 7.12–7.10 (m, 2H), 6.97–6.95 (m, 1H), 3.91 (s, 3H), 3.87 (s, 3H), 3.80 (s, 3H), 3.54 (s, 3H), 2.36 (s, 3H); <sup>13</sup>C NMR (DMSO-*d*<sub>6</sub>, 125 MHz)  $\delta$  165.4, 159.3, 159.0, 157.7, 149.2, 148.9, 139.1, 138.7, 130.1, 129.3, 129.2, 128.9, 126.2, 124.6, 121.8, 121.2, 118.1, 115.3 (2C), 112.6, 111.5, 108.0, 55.1 (2C), 54.8, 29.1, 10.0; IR (film)  $\nu_{max}$  3053, 2986, 2928, 2685, 2305, 1717, 1601, 1421, 1383, 1265, 1153, 895, 737, 704; HRMS (ESI<sup>+</sup>) *m/z*: [M + H<sup>+</sup>] calcd for C<sub>27</sub>H<sub>26</sub>NO<sub>9</sub>S, 540.1328; found, 540.1395.

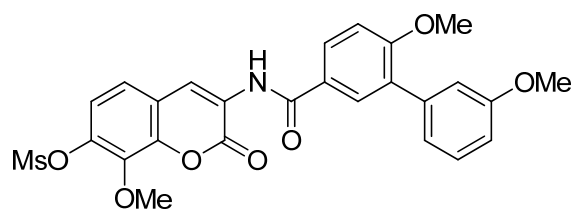

**3-(3',6-dimethoxy-[1,1'-biphenyl]-3-ylcarboxamido)-8-methoxy-2-oxo-2H-chromen-7-yl methanesulfonate (73c):** Methanesulfonyl chloride (17  $\mu$ L, 0.22 mmol) was added to **6b** (25 mg, 0.056 mmol) in anhydrous pyridine (0.40 mL) at 0° C. The resulting solution was warmed to rt and stirred overnight, then diluted with H<sub>2</sub>O. The desired product was extracted with EtOAc (3  $\times$  10 mL); combined organic fractions were dried (Na<sub>2</sub>SO<sub>4</sub>), filtered, and concentrated. The residue was purified via column chromatography (SiO<sub>2</sub>, 40:1, CH<sub>2</sub>Cl<sub>2</sub>:acetone) to afford **73c** as a



yellow amorphous solid (29 mg, 99%):  $^1\text{H}$  NMR ( $\text{CDCl}_3$ , 500 MHz)  $\delta$  8.80 (s, 1H), 8.73 (s, 1H), 7.88 (dd,  $J = 8.5, 2.0$  Hz, 1H), 7.85 (d,  $J = 2.5$  Hz, 1H), 7.34 (t,  $J = 8.0$  Hz, 1H), 7.26–7.23 (m, 2H), 7.09–7.04 (m, 3H), 6.91–6.89 (m, 1H), 4.09 (s, 3H), 3.87 (s, 3H), 3.83 (s, 3H), 3.23 (s, 3H);  $^{13}\text{C}$  NMR ( $\text{CDCl}_3$ , 125 MHz)  $\delta$  165.7, 160.2, 159.5, 158.0, 143.6, 142.4, 140.0, 138.6, 131.2, 130.1, 129.3, 128.4, 125.7, 124.6, 122.5 (2C), 122.1, 121.1, 120.6, 115.4, 113.2, 111.2, 62.6, 56.0, 55.4, 38.6; IR (film)  $\nu_{\text{max}}$  2928, 2359, 2341, 1720, 1676, 1603, 1521, 1501, 1464, 1364, 1242, 1180, 1078, 970, 860; HRMS (ESI $^+$ )  $m/z$ :  $[\text{M} + \text{H}^+]$  calcd for  $\text{C}_{26}\text{H}_{24}\text{NO}_9\text{S}$ , 526.1172; found, 526.1179.

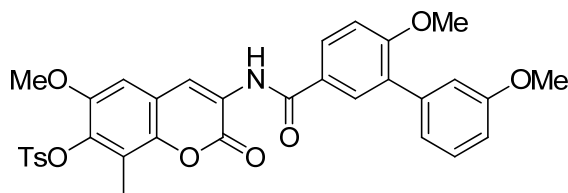

**3-(3',6-dimethoxy-[1,1'-biphenyl]-3-ylcarboxamido)-6-methoxy-8-methyl-2-oxo-2H-chromen-7-yl 4-methylbenzenesulfonate (74b):** 4-methylbenzene-1-sulfonyl chloride (50  $\mu\text{L}$ , 0.26 mmol) was added to **6b** (30 mg, 0.065 mmol) in anhydrous pyridine (0.40 mL) at  $0^\circ\text{C}$ . The resulting solution was warmed to rt and stirred overnight, then diluted with  $\text{H}_2\text{O}$  (10 mL). The desired product was extracted with EtOAc ( $3 \times 10$  mL); combined organic fractions were dried ( $\text{Na}_2\text{SO}_4$ ), filtered, and concentrated. The residue was purified via column chromatography ( $\text{SiO}_2$ , 40:1,  $\text{CH}_2\text{Cl}_2$ :acetone) to afford **74b** as a yellow amorphous solid (39 mg, 98%):  $^1\text{H}$  NMR ( $\text{CDCl}_3$ , 500 MHz)  $\delta$  8.79 (s, 1H), 8.78 (s, 1H), 7.92 (dd,  $J = 8.5, 2.5$  Hz, 1H), 7.89 (d,  $J = 2.5$  Hz, 1H), 7.86 (d,  $J = 8.5$  Hz, 1H), 7.39–7.36 (m, 3H), 7.13–7.07 (m, 3H), 6.95–6.93 (m, 1H), 6.81 (s, 1H), 3.91 (s, 3H), 3.86 (s, 3H), 3.59 (s, 3H), 2.49 (s, 3H), 2.37 (s, 3H);  $^{13}\text{C}$  NMR ( $\text{CDCl}_3$ , 125 MHz)  $\delta$  165.8, 160.0, 159.4, 159.0, 149.8, 145.3, 142.6, 138.7, 138.6, 134.3, 131.2, 130.2, 129.7 (2C), 129.3, 128.5 (2C), 128.4, 125.8, 124.6, 123.0, 122.7, 122.1, 118.6, 115.4,

113.2, 111.1, 106.6, 56.0, 55.9, 55.4, 21.9, 10.4; IR (film)  $\nu_{max}$  3053, 2986, 2685, 2305, 1713, 1601, 1421, 1383, 1265, 1163, 895, 739, 706; HRMS (ESI<sup>+</sup>)  $m/z$ : [M + H<sup>+</sup>] calcd for C<sub>33</sub>H<sub>30</sub>NO<sub>9</sub>S, 616.1641; found, 616.1676.

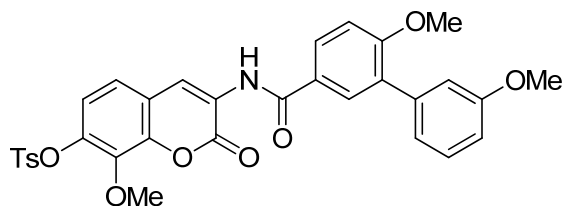

**3-(3',6-dimethoxy-[1,1'-biphenyl]-3-ylcarboxamido)-8-methoxy-2-oxo-2H-chromen-7-yl 4-methylbenzenesulfonate (74c):** 4-methylbenzene-1-sulfonyl chloride (43  $\mu$ L, 0.22 mmol) was added to **6c** (25 mg, 0.056 mmol) in anhydrous pyridine (0.40 mL) at 0° C. The resulting solution was warmed to rt and stirred overnight, then diluted with H<sub>2</sub>O (10 mL). The desired product was extracted with EtOAc (3  $\times$  10 mL); combined organic fractions were dried (Na<sub>2</sub>SO<sub>4</sub>), filtered, and concentrated. The residue was purified via column chromatography (SiO<sub>2</sub>, 40:1, CH<sub>2</sub>Cl<sub>2</sub>:acetone) to afford **74c** as a colorless amorphous solid (33 mg, 99%): <sup>1</sup>H NMR (CDCl<sub>3</sub>, 500 MHz)  $\delta$  8.80 (s, 1H), 8.74 (s, 1H), 7.91 (dd,  $J$  = 8.5, 2.5 Hz, 1H), 7.88 (d,  $J$  = 2.5 Hz, 1H), 7.81–7.79 (m, 2H), 7.38–7.34 (m, 3H), 7.19 (d,  $J$  = 8.5 Hz, 1H), 7.12–7.07 (m, 4H), 6.95–6.92 (m, 1H), 3.91 (s, 3H), 3.90 (s, 3H), 3.86 (s, 3H), 2.47 (s, 3H); <sup>13</sup>C NMR (CDCl<sub>3</sub>, 125 MHz)  $\delta$  165.7, 160.2, 159.5, 158.1, 145.9, 143.5, 142.6, 140.5, 138.6, 132.9, 131.3, 130.1, 130.0 (2C), 129.3, 128.6 (2C), 128.4, 125.7, 124.4, 122.7, 122.1, 121.9, 120.5, 120.2, 115.4, 113.3, 111.2, 62.1, 56.0, 55.5, 21.9; IR (film)  $\nu_{max}$  3053, 2927, 2359, 2341, 1720, 1676, 1603, 1522, 1501, 1462, 1364, 1265, 1178, 1078, 1007, 858, 818, 737, 706; HRMS (ESI<sup>+</sup>)  $m/z$ : [M + H<sup>+</sup>] calcd for C<sub>32</sub>H<sub>28</sub>NO<sub>9</sub>S, 602.1485; found, 602.1494.

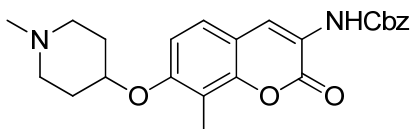

**Benzyl 8-methyl-7-(1-methylpiperidin-4-yloxy)-2-oxo-2H-chromen-3-ylcarbamate (75a).**

Compound **75a** was obtained as a white amorphous solid (60 mg, 58%).  $^1\text{H}$  NMR (400 MHz,  $\text{CDCl}_3$ )  $\delta$  8.25 (s, 1H), 7.55 (s, 1H), 7.40–7.34 (m, 5H), 7.24 (d,  $J = 8.0$  Hz, 1H), 6.84 (d,  $J = 8.0$  Hz, 1H), 5.22 (s, 2H), 4.48 (m, 1H), 2.71 (m, 2H), 2.52–2.49 (m, 2H), 2.38 (s, 3H), 2.11–2.07 (m, 2H), 1.98–1.89 (m, 2H).  $^{13}\text{C}$  NMR (100 MHz,  $\text{CDCl}_3$ )  $\delta$  158.8, 156.5, 153.2, 149.2, 135.6, 128.7, 128.5, 128.2, 125.1, 122.2, 121.4, 115.2, 113.0, 110.4, 72.4, 67.4, 52.0 (2C), 46.0, 30.3 (2C), 8.4. IR (film)  $\nu_{\text{max}}$  3406, 3319, 2939, 2849, 2791, 1711, 1609, 1524, 1366, 1271, 1227, 1204, 1103, 1038, 1024  $\text{cm}^{-1}$ . HRMS (ESI $^+$ )  $m/z$ :  $[\text{M} + \text{H}^+]$  calcd for  $\text{C}_{24}\text{H}_{27}\text{N}_2\text{O}_5$ , 423.1920; found 423.1920.

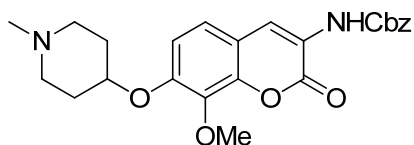**Benzyl 8-methoxy-7-(1-methylpiperidin-4-yloxy)-2-oxo-2H-chromen-3-ylcarbamate (75b).**

Compound **75b** was obtained as light brown oil (63 mg, 89%).  $^1\text{H}$  NMR (400 MHz,  $\text{CDCl}_3$ )  $\delta$  8.25 (s, 1H), 7.58 (s, 1H), 7.40–7.34 (m, 5H), 7.13 (d,  $J = 8.0$  Hz, 1H), 6.90 (d,  $J = 8.0$  Hz, 1H), 5.22 (s, 2H), 4.46 (m, 1H), 3.98 (s, 3H), 2.80–2.77 (m, 2H), 2.51–2.40 (m, 2H), 2.39 (s, 3H), 2.12–2.08 (m, 2H), 1.98–1.88 (m, 2H).  $^{13}\text{C}$  NMR (100 MHz,  $\text{CDCl}_3$ )  $\delta$  158.2, 153.2, 151.5, 144.0, 137.8, 135.6, 128.7, 128.5, 128.2, 122.1, 122.0, 121.8, 114.8, 113.5, 72.3, 67.5, 61.5, 52.1 (2C), 45.8, 30.4 (2C). IR (film)  $\nu_{\text{max}}$  3406, 3331, 2974, 2941, 2893, 1720, 1703, 1607, 1553, 1502, 1462, 1367, 1240, 1070.  $\text{cm}^{-1}$ . HRMS (ESI $^+$ )  $m/z$ :  $[\text{M} + \text{H}^+]$  calcd for  $\text{C}_{24}\text{H}_{27}\text{N}_2\text{O}_6$ , 439.1869; found 439.1867.

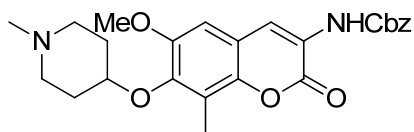

**Benzyl 6-methoxy-8-methyl-7-(1-methylpiperidin-4-yloxy)-2-oxo-2H-chromen-3-ylcarbamate (75c).** Compound **75c** was obtained as light brown oil (134 mg, 88%).  $^1\text{H}$  NMR (400 MHz,  $\text{CDCl}_3$ )  $\delta$  8.25 (s, 1H), 7.59 (s, 1H), 7.42–7.35 (m, 5H), 6.77 (s, 1H), 5.23 (s, 2H), 4.23–4.22 (m, 1H), 3.86 (s, 3H), 2.85–2.82 (m, 2H), 2.36 (s, 3H), 2.33 (s, 2H), 2.28–2.20 (m, 2H), 2.01–1.97 (m, 2H), 1.93–1.86 (m, 2H).  $^{13}\text{C}$  NMR (100 MHz,  $\text{CDCl}_3$ )  $\delta$  158.9, 153.4, 150.5, 146.8, 143.4, 135.7, 128.9, 128.7, 128.4, 122.9, 121.9, 120.9, 115.2, 106.3, 78.1, 67.7, 56.2, 53.3 (2C), 46.1, 31.8 (2C), 9.9. IR (film)  $\nu_{\text{max}}$  3404, 3312, 2937, 2864, 1710, 1693, 1609, 1529, 1466, 1385, 1367, 1288, 1240, 1211, 1109, 1078, 1031  $\text{cm}^{-1}$ . HRMS (ESI $^+$ )  $m/z$ :  $[\text{M} + \text{H}^+]$  calcd for  $\text{C}_{25}\text{H}_{29}\text{N}_2\text{O}_6$ , 435.2026; found, 453.2021.

**Representative procedure for the preparation of compounds 77, 78, 81 and 82:**

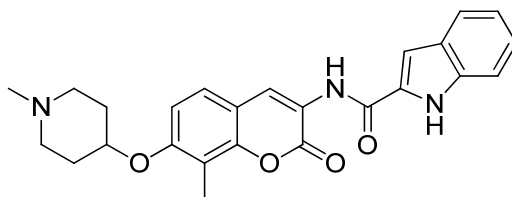

**N-(8-methyl-7-(1-methylpiperidin-4-yloxy)-2-oxo-2H-chromen-3-yl)-1H-indole-2-carboxamide (78a).** Compound **75a** (60 mg, 0.14 mmol) and Pd/C mixture were suspended in THF (2 mL) and stirred under hydrogen overnight. The mixture was filtered and the filtrate was concentrated and dried under vacuum for 2 h. The residue was dissolved in methylene chloride (2 mL) and treated with freshly prepared indole carboxylic chloride (25.5 mg, 0.14 mmol) and pyridine (0.1 mL). The resulting mixture was stirred at rt for 2 h, then purified via column chromatography ( $\text{SiO}_2$ ,  $\text{CH}_2\text{Cl}_2$ :MeOH, 10:1) to yield compound **78a** (31 mg, 51%).  $^1\text{H}$ MNMR (500 MHz,  $\text{CD}_3\text{CD}_2\text{-CDCl}_3$ )  $\delta$  8.50 (s, 1H), 7.48 (d,  $J = 8.1$  Hz, 1H), 7.29 (d,  $J = 8.2$  Hz, 1H), 7.16 (d,  $J = 8.6$  Hz, 1H), 7.09 (t,  $J = 8.1$  Hz, 1H), 7.00 (s, 1H), 6.92 (t,  $J = 7.9$  Hz, 1H), 6.72 (d,

$J = 8.7$  Hz, 1H), 4.54 (m, 1H), 2.53 (m, 2H), 2.35 (m, 2H), 2.18 (s, 3H), 2.13 (s, 3H), 1.85 (m, 2H), 1.75 (m, 2H).  $^{13}\text{C}$  MNR (125 MHz,  $\text{CD}_3\text{CD}-\text{CDCl}_3$ )  $\delta$  160.5, 159.4, 156.7, 149.4, 137.3, 129.8, 127.2, 125.6, 125.3, 124.8, 122.0, 120.9, 120.5, 114.9, 113.2, 112.0, 110.4, 104.6, 77.4, 51.5 (2C), 45.3, 29.7 (2C), 7.9. IR (film)  $\nu_{\text{max}}$  3391, 3292, 2958, 2851, 1709, 1643, 1605, 1537, 1385, 1263, 1236, 1211, 1107, 1036, 731  $\text{cm}^{-1}$ . HRMS ( $\text{ESI}^+$ )  $m/z$ :  $[\text{M} + \text{H}^+]$  calcd for  $\text{C}_{25}\text{H}_{26}\text{N}_3\text{O}_4$ , 432.1923; found 432.1927. This material was determined to be 100% pure (Retention time = 8.37 min) by HPLC (ZORBAX Eclipse Plus 4.6 x 150 mm column eluting with 70%  $\text{H}_2\text{O}$  (0.2%  $\text{H}_3\text{PO}_4$ )/30% MeCN  $\rightarrow$  52%  $\text{H}_2\text{O}$  (0.2%  $\text{H}_3\text{PO}_4$ )/48% MeCN  $\rightarrow$  95%  $\text{H}_2\text{O}$  (0.2%  $\text{H}_3\text{PO}_4$ )/5% MeCN  $\rightarrow$  70%  $\text{H}_2\text{O}$  (0.2%  $\text{H}_3\text{PO}_4$ )/30% MeCN, flow rate 1.0 mL/min.

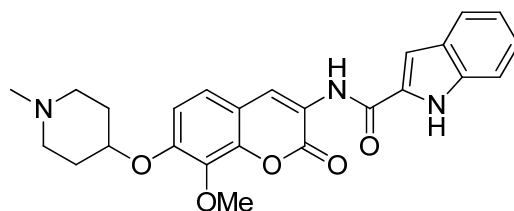

**N-(8-methoxy-7-(1-methylpiperidin-4-yloxy)-2-oxo-2H-chromen-3-yl)-1H-indole-2-carboxamide (78b).** Compound **78b** was obtained as a light brown amorphous solid (28 mg, 38%).  $^1\text{H}$  MNR (500 MHz  $\text{CDCl}_3/\text{MeOD}$ )  $\delta$  8.66 (s, 1H), 7.63 (d,  $J = 8.0$  Hz, 1H), 7.41 (d,  $J = 8.3$  Hz, 1H), 7.24 (t,  $J = 8.2$  Hz, 1H), 7.16 (d,  $J = 8.8$  Hz, 1H), 7.13 (s, 1H), 7.09 (t,  $J = 8.0$  Hz, 1H), 6.88 (d,  $J = 8.8$  Hz, 1H), 4.45 (m, 1H), 3.93 (s, 3H), 2.71 (m, 2H), 2.45 (m, 2H), 2.32 (s, 3H), 2.15–2.11 (m, 2H), 2.00–1.91 (m, 2H).  $^{13}\text{C}$  MNR (125 MHz  $\text{CDCl}_3/\text{MeOD}$ )  $\delta$  160.4, 158.7, 151.75, 144.2, 137.5, 137.2, 129.7, 127.4, 125.2, 124.3, 122.5, 122.3, 121.7, 120.8, 114.7, 113.4, 112.1, 104.7, 77.3, 61.5, 51.7 (2C), 45.6, 29.6 (2C). IR (film)  $\nu_{\text{max}}$  3390, 3312, 3292, 2928, 2851, 1711, 1653, 1607, 1535, 1383, 1264, 1236, 1211, 1107, 1036, 738  $\text{cm}^{-1}$ . HRMS ( $\text{ESI}^+$ )  $m/z$ :  $[\text{M} + \text{H}^+]$  calcd for  $\text{C}_{25}\text{H}_{26}\text{N}_3\text{O}_5$ , 448.1873; found 448.1886. This material was determined to be 99% pure (Retention time = 9.04) by HPLC (ZORBAX Eclipse Plus 4.6 x 150 mm column eluting

with 70% H<sub>2</sub>O (0.2% H<sub>3</sub>PO<sub>4</sub>)/30% MeCN → 52% H<sub>2</sub>O (0.2% H<sub>3</sub>PO<sub>4</sub>)/48% MeCN → 95% H<sub>2</sub>O (0.2% H<sub>3</sub>PO<sub>4</sub>)/5% MeCN → 70% H<sub>2</sub>O (0.2% H<sub>3</sub>PO<sub>4</sub>)/30% MeCN, flow rate 1.0 mL/min.

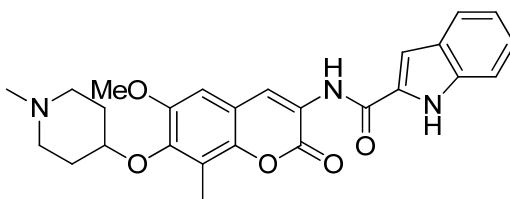

**N-(6-methoxy-8-methyl-7-(1-methylpiperidin-4-yloxy)-2-oxo-2H-chromen-3-yl)-1H-indole-2-carboxamide (78c).** Compound **78c** was obtained as a light brown amorphous solid (19 mg, 53%). <sup>1</sup>H MNR (500 MHz DMSO-*d*<sub>6</sub>) 11.91 (s, 1H), 9.56 (s, 1H), 8.55 (s, 1H), 7.67 (d, *J* = 8.1 Hz, 1H), 7.48 (d, *J* = 8.2 Hz, 1H), 7.42 (s, 1H), 7.30 (s, 1H), 7.25 (t, *J* = 8.1 Hz, 1H), 7.08 (t, *J* = 7.7 Hz, 1H), 4.24–4.21 (m, 1H), 3.85 (s, 3H), 2.86 (m, 2H), 2.33 (s, 3H), 2.50 (m, 2H), 2.29 (s, 3H), 1.92–1.90 (m, 2H), 1.79–1.77 (m, 2H). <sup>13</sup>CMNR (125 MHz DMSO-*d*<sub>6</sub>) δ 160.0, 158.0, 149.7, 146.4, 143.5, 137.1, 130.3, 127.6, 126.9, 124.3, 122.3, 122.0, 120.1, 119.2, 114.6, 112.4, 107.4, 105.1, 77.1, 56.9, 52.1 (2C), 44.7, 30.7 (2C), 9.4. IR (film) *v*<sub>max</sub> 3379, 3312, 2924, 2851, 1713, 1659, 1582, 1543, 1468, 1392, 1292, 1136, 1084, 1036 739 cm<sup>-1</sup>. HRMS (ESI<sup>+</sup>) *m/z*: [M + H<sup>+</sup>] calcd for C<sub>24</sub>H<sub>26</sub>N<sub>3</sub>O<sub>5</sub>, 462.2029; found 462.2032. This material was determined to be 99% pure (Retention time = 8.70) by HPLC (ZORBAX Eclipse Plus 4.6 x 150 mm column eluting with 70% H<sub>2</sub>O (0.2% H<sub>3</sub>PO<sub>4</sub>)/30% MeCN → 52% H<sub>2</sub>O (0.2% H<sub>3</sub>PO<sub>4</sub>)/48% MeCN → 95% H<sub>2</sub>O (0.2% H<sub>3</sub>PO<sub>4</sub>)/5% MeCN → 70% H<sub>2</sub>O (0.2% H<sub>3</sub>PO<sub>4</sub>)/30% MeCN, flow rate 1.0 mL/min.

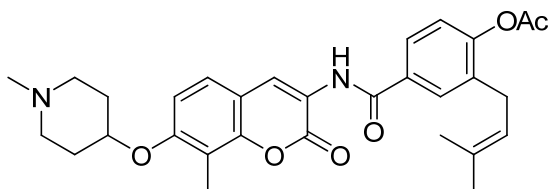

**4-(8-Methyl-7-(1-methylpiperidin-4-yloxy)-2-oxo-2H-chromen-3-ylcarbamoyl)-2-(3-methylbut-2-enyl)phenyl acetate (79a).** Compound **79a** was obtained as white amorphous solid

(76 mg, 73%).  $^1\text{H}$  NMR (500MHz,  $\text{CDCl}_3$ ),  $\delta$  8.79 (s, 1H), 8.71 (s, 1H), 7.81 (d,  $J = 2.1$  Hz, 1H), 7.77 (dd,  $J = 8.3$  Hz, 2.1, 1H), 7.34(d,  $J = 8.6$  Hz, 1H), 7.18 (d,  $J = 8.3$  Hz, 1H), 6.89 (d,  $J = 8.6$  Hz, 1H), 5.25 (m, 1H), 4.52 (m, 1H), 3.33 (d,  $J = 7.2$  Hz, 2H), 2.76–2.70 (m, 2H), 2.55–2.45 (m, 2H), 2.40 (s, 3H), 2.35 (s, 6H), 2.15–2.09 (m, 2H), 1.97–1.92 (m, 2H), 1.78 (s, 3H), 1.74 (s, 3H).  $^{13}\text{C}$  NMR  $\delta$ (125MHz,  $\text{CDCl}_3$ ) 169.1, 165.6, 159.6, 157.1, 152.3, 149.7, 134.8, 134.5, 131.8, 129.5, 126.1, 125.8, 124.8, 123.1, 121.7, 120.8, 115.4, 113.5, 110.6, 77.4, 52.3 (2C), 46.2, 30.5 (2C), 29.0, 25.9, 21.1, 18.1, 8.6. IR (film)  $\nu_{\text{max}}$  3400, 3087, 2922, 2851, 1765, 1711, 1672, 1607, 1526, 1493, 1369, 1248, 1202, 1175, 1099, 1040  $\text{cm}^{-1}$ . HRMS (ESI $^+$ )  $m/z$ :  $[\text{M} + \text{H}^+]$  calcd for  $\text{C}_{30}\text{H}_{35}\text{N}_2\text{O}_6$ , 519.2495; found, 519.2485. This material was determined to be 95% pure (Retention time = 14.3) by HPLC (ZORBAX Eclipse Plus 4.6 x 150 mm column eluting with 70%  $\text{H}_2\text{O}$  (0.2%  $\text{H}_3\text{PO}_4$ )/30% MeCN  $\rightarrow$  52%  $\text{H}_2\text{O}$  (0.2%  $\text{H}_3\text{PO}_4$ )/48% MeCN  $\rightarrow$  95%  $\text{H}_2\text{O}$  (0.2%  $\text{H}_3\text{PO}_4$ )/5% MeCN  $\rightarrow$  70%  $\text{H}_2\text{O}$  (0.2%  $\text{H}_3\text{PO}_4$ )/30% MeCN, flow rate 1.0 mL/min.

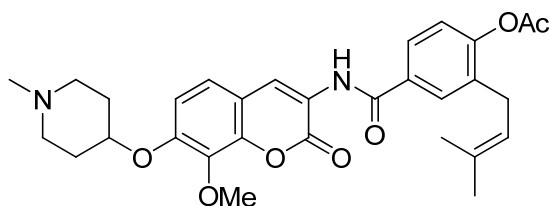

**4-(8-methoxy-7-(1-methylpiperidin-4-yloxy)-2-oxo-2H-chromen-3-ylcarbamoyl)-2-(3-methylbut-2-enyl)phenyl acetate (79b).** Compound **79b** was obtained as white amorphous solid (85 mg, 61%).  $^1\text{H}$  NMR (500MHz,  $\text{CDCl}_3$ )  $\delta$  8.70 (s, 1H), 8.64 (s, 1H), 7.72 (d,  $J = 2.2$  Hz, 1H), 7.68 (dd,  $J = 8.3, 2.3$  Hz, 1H), 7.14 (d,  $J = 8.5$  Hz, 2H), 7.10 (d,  $J = 8.4$  Hz, 1H), 6.86 (d,  $J = 8.6$  Hz, 1H), 5.15 (m, 1H), 4.49 (m, 1H), 3.93 (s, 3H), 3.24 (d,  $J = 7.2$  Hz, 2H), 2.90–2.85 (m, 2H), 2.68–2.65 (m, 2H), 2.46 (s, 3H), 2.26 (s, 3H), 2.19–2.16 (m, 2H), 1.98–1.94(m, 2H), 1.69 (s, 3H), 1.65 (s, 3H).  $^{13}\text{C}$  NMR (125MHz,  $\text{CDCl}_3$ )  $\delta$ 169.0, 165.6, 158.8, 152.3, 151.6, 144.4, 137.9, 134.8, 134.4, 131.5, 129.5, 126.0, 124.1, 123.1, 122.8, 122.4, 120.7, 115.2, 113.8, 72.1, 61.7,

51.5 (2C), 45.3, 29.5 (2C), 28.9, 25.8, 21.0, 18.0. IR (film)  $\nu_{max}$  3406, 3084, 2962, 2937, 2831, 1731, 1711, 1666, 1604, 1529, 1502, 1462, 1366, 1258, 1178, 1103, 1036  $\text{cm}^{-1}$ . HRMS (ESI<sup>+</sup>)  $m/z$ : [M + H<sup>+</sup>] calcd for C<sub>30</sub>H<sub>35</sub>N<sub>2</sub>O<sub>7</sub>, 535.2444; found, 535.2442.

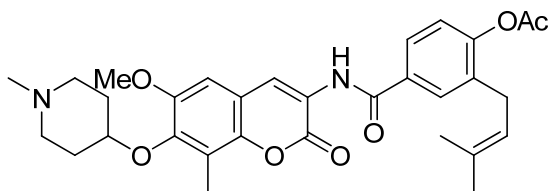

**4-(6-methoxy-8-methyl-7-(1-methylpiperidin-4-yloxy)-2-oxo-2H-chromen-3-ylcarbamoyl)-2-(3-methylbut-2-enyl)phenyl acetate (79c).** Compound **79c** was obtained as white amorphous solid (81mg, 70%). <sup>1</sup>H NMR (500MHz, CDCl<sub>3</sub>)  $\delta$  8.78 (s, 1H), 8.75 (s, 1H), 7.81 (d,  $J$  = 2.2 Hz, 1H), 7.77 (dd,  $J$  = 8.3, 2.3 Hz, 1H), 7.19 (d,  $J$  = 8.5 Hz, 2H), 6.85 (s, 1H), 5.25 (m, 1H), 4.32 (m, 1H), 3.89 (s, 3H), 3.32 (d,  $J$  = 7.2 Hz, 2H), 3.07–3.04 (m, 2H), 2.82–2.65 (m, 2H), 2.54 (s, 3H), 2.39 (s, 3H), 2.35 (s, 3H), 2.19–2.16 (m, 2H), 2.11–2.02 (m, 2H), 1.77 (s, 3H), 1.74 (s, 3H). <sup>13</sup>C NMR (125MHz, CDCl<sub>3</sub>)  $\delta$  169.2, 165.8, 159.4, 152.4, 150.4, 147.1, 143.8, 134.9, 134.6, 131.7, 129.6, 126.2, 124.1, 123.2, 120.9, 120.8, 115.5, 106.8, 77.5, 56.3, 52.3 (2C), 45.3, 30.6 (2C), 29.1, 26.0, 21.1, 18.1, 10.0. IR (film)  $\nu_{max}$  3404, 3086, 2935, 2852, 1721, 1711, 1672, 1605, 1529, 1383, 1250, 1177, 1085, 1034  $\text{cm}^{-1}$ . HRMS (ESI<sup>+</sup>)  $m/z$ : [M + H<sup>+</sup>] calcd for C<sub>31</sub>H<sub>37</sub>N<sub>2</sub>O<sub>7</sub>, 549.2601; found, 549.2604. This material was determined to be 98% pure (Retention time = 13.9) by HPLC (ZORBAX Eclipse Plus 4.6 x 150 mm column eluting with 70% H<sub>2</sub>O (0.2% H<sub>3</sub>PO<sub>4</sub>)/30% MeCN → 52% H<sub>2</sub>O (0.2% H<sub>3</sub>PO<sub>4</sub>)/48% MeCN → 95% H<sub>2</sub>O (0.2% H<sub>3</sub>PO<sub>4</sub>)/5% MeCN → 70% H<sub>2</sub>O (0.2% H<sub>3</sub>PO<sub>4</sub>)/30% MeCN, flow rate 1.0 mL/min.

**Representative procedure for the preparation of compounds 80 and 84:**



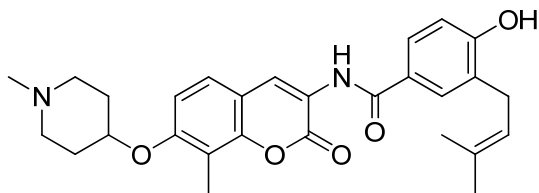

**4-Hydroxy-N-(8-methyl-7-(1-methylpiperidin-4-yloxy)-2-oxo-2H-chromen-3-yl)-3-(3-methylbut-2-enyl)benzamide (80a).** Compound **79a** (52 mg, 0.1 mmol) was dissolved in 10% triethylamine/methanol (3 mL). The solution was stirred at rt overnight and concentrated. The residue was purified via column chromatography (SiO<sub>2</sub>, CH<sub>2</sub>Cl<sub>2</sub>:MeOH, 10:1) to afford **80a** as a white amorphous solid (37 mg, 73%). <sup>1</sup>H NMR (500MHz, DMSO-*d*<sub>6</sub>) δ 9.22 (s, 1H), 8.47 (s, 1H), 7.68–7.66 (m, 2H), 7.53 (d, *J* = 8.7 Hz, 1H), 7.11 (d, *J* = 8.9 Hz, 1H), 6.90 (d, *J* = 8.7 Hz, 1H), 5.30 (m, 1H), 4.57 (m, 1H), 3.27 (d, *J* = 7.3 Hz, 2H), 2.62–2.54 (m, 2H), 2.34–2.28 (m, 2H), 2.22 (s, 3H), 2.21 (s, 3H), 1.96–1.92 (m, 2H), 1.76–1.72(m, 2H), 1.71 (s, 3H), 1.69 (s, 3H). <sup>13</sup>C NMR (125MHz, DMSO-*d*<sub>6</sub>) δ 165.3, 158.8, 158.4, 156.6, 149.5, 131.9, 129.2, 127.8, 127.7, 126.8, 126.0, 124.0, 122.3, 121.3, 114.6, 113.4, 112.7, 110.8, 72.1, 51.8 (2C), 45.7, 30.2 (2C), 27.9, 25.6, 17.7, 8.2. IR (film)  $\nu_{max}$  3421, 3081, 2938, 2856, 1703, 1666, 1601, 1528, 1504, 1366, 1248, 1178, 1150, 1094, 1040 cm<sup>-1</sup>. HRMS (ESI<sup>+</sup>) *m/z*: [M + H<sup>+</sup>] calcd for C<sub>28</sub>H<sub>33</sub>N<sub>2</sub>O<sub>5</sub>, 477.2389; found, 477.2397. This material was determined to be 98% pure (Retention time = 13.5) by HPLC (ZORBAX Eclipse Plus 4.6 x 150 mm column eluting with 70% H<sub>2</sub>O (0.2% H<sub>3</sub>PO<sub>4</sub>)/30% MeCN → 52% H<sub>2</sub>O (0.2% H<sub>3</sub>PO<sub>4</sub>)/48% MeCN → 95% H<sub>2</sub>O (0.2% H<sub>3</sub>PO<sub>4</sub>)/5% MeCN → 70% H<sub>2</sub>O (0.2% H<sub>3</sub>PO<sub>4</sub>)/30% MeCN, flow rate 1.0 mL/min.

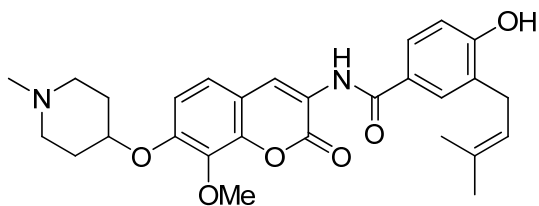

**4-hydroxy-N-(8-methoxy-7-(1-methylpiperidin-4-yloxy)-2-oxo-2H-chromen-3-yl)-3-(3-methylbut-2-enyl)benzamide (80b).** Compound **80b** was obtained as white amorphous solid (24 mg, 75%).  $^1\text{H}$  NMR (500MHz,  $\text{CDCl}_3$ )  $\delta$  9.26 (s, 1H), 8.49 (s, 1H), 7.68–7.66 (m, 2H), 7.42 (d,  $J = 8.4$  Hz, 1H), 7.18 (d,  $J = 9.0$  Hz, 1H), 6.91 (d,  $J = 8.9$  Hz, 1H), 5.30 (m, 1H), 4.58 (m, 1H), 3.88 (s, 3H), 3.27 (d,  $J = 7.2$  Hz, 2H), 2.76–2.69 (m, 2H), 2.48–2.39 (m, 2H), 2.32 (s, 3H), 2.04–1.95 (m, 2H), 1.83–1.74 (m, 2H), 1.71 (s, 3H), 1.69 (s, 3H).  $^{13}\text{C}$  NMR (125MHz,  $\text{CDCl}_3$ )  $\delta$  165.3, 158.8, 157.9, 151.5, 144.3, 136.3, 131.9, 129.2, 127.7, 127.4, 126.9, 123.9, 122.8, 122.3, 121.9, 114.6, 114.0, 112.7, 72.7, 60.9, 51.7 (2C), 45.1, 29.9 (2C), 27.9, 25.5, 17.7. IR (film)  $\nu_{\text{max}}$  3406, 3317 (broad), 3086, 3053, 2941, 2833, 1711, 1666, 1605, 1527, 1502, 1460, 1365, 1265, 1178, 1080, 1034, 739  $\text{cm}^{-1}$ . HRMS (ESI $^+$ )  $m/z$ :  $[\text{M} + \text{H}^+]$  calcd for  $\text{C}_{28}\text{H}_{33}\text{N}_2\text{O}_6$ , 493.2339; found; 493.2337.

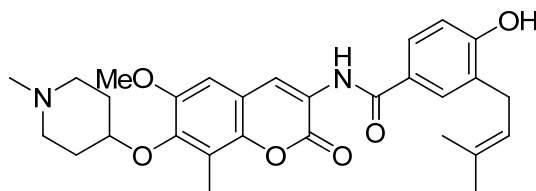

**4-hydroxy-N-(6-methoxy-8-methyl-7-(1-methylpiperidin-4-yloxy)-2-oxo-2H-chromen-3-yl)-3-(3-methylbut-2-enyl)benzamide (80c).** Compound **80c** was obtained as white amorphous solid (21mg, 81%).  $^1\text{H}$  NMR (500MHz,  $\text{DMSO-}d_6$ )  $\delta$  10.2 (s, 1H), 9.23 (s, 1H), 8.54 (s, 1H), 7.68–7.66 (m, 2H), 7.28 (s, 1H), 6.92 (d,  $J = 9.0$  Hz, 1H), 5.30 (m, 1H), 4.21 (m, 1H), 3.85 (s, 3H), 3.35–3.30 (m, 2H), 3.28 (d,  $J = 7.2$  Hz, 2H), 2.90–2.81 (m, 2H), 2.32–2.29 (m, 2H), 2.28 (s, 3H), 2.25 (s, 3H), 1.93–1.88 (m, 2H), 1.78–1.71 (m, 2H), 1.71 (s, 3H), 1.70 (s, 3H).  $^{13}\text{C}$  NMR (125MHz,  $\text{DMSO-}d_6$ )  $\delta$  165.4, 158.9, 158.3, 149.8, 146.2, 143.3, 131.9, 129.2, 127.7, 126.9, 126.5, 123.9, 122.8, 122.3, 119.2, 114.8, 114.6, 107.4, 77.3, 56.1, 52.2 (2C), 44.8, 30.8 (2C), 27.9, 25.5, 17.7, 9.4. IR (film)  $\nu_{\text{max}}$  3406, 3088, 3045, 2931, 2853, 1709, 1657, 1601, 1529, 1500,

1381, 1250, 1178, 1086, 1034  $\text{cm}^{-1}$ . HRMS (ESI<sup>+</sup>)  $m/z$ :  $[\text{M} + \text{H}^+]$  calcd for  $\text{C}_{29}\text{H}_{35}\text{N}_2\text{O}_6$ , 507.2495; found, 507.2494. This material was determined to be 99% pure (Retention time = 13.2) by HPLC (ZORBAX Eclipse Plus 4.6 x 150 mm column eluting with 70%  $\text{H}_2\text{O}$  (0.2%  $\text{H}_3\text{PO}_4$ )/30% MeCN  $\rightarrow$  52%  $\text{H}_2\text{O}$  (0.2%  $\text{H}_3\text{PO}_4$ )/48% MeCN  $\rightarrow$  95%  $\text{H}_2\text{O}$  (0.2%  $\text{H}_3\text{PO}_4$ )/5% MeCN  $\rightarrow$  70%  $\text{H}_2\text{O}$  (0.2%  $\text{H}_3\text{PO}_4$ )/30% MeCN, flow rate 1.0 mL/min.

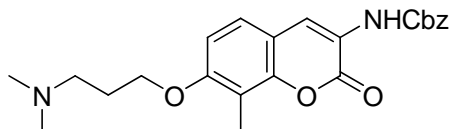

**Benzyl 7-(3-(dimethylamino)propoxy)-8-methyl-2-oxo-2H-chromen-3-yl carbamate (81a).**

Compound **81a** was obtained as colorless oil (670 mg, 72%). <sup>1</sup>H NMR (400MHz,  $\text{CDCl}_3$ )  $\delta$  8.11 (s, 1H), 7.45 (s, 1H), 7.29–7.23 (m, 5H), 7.11 (d,  $J = 8.6$  Hz, 1H), 6.70 (d,  $J = 8.6$  Hz, 1H), 5.10 (s, 2H), 3.97 (t,  $J = 5.8$  Hz, 2H), 2.46 (t,  $J = 5.8$  Hz, 2H), 2.22 (s, 6H), 2.17 (s, 3H), 1.93 (m, 2H). <sup>13</sup>C NMR (100 MHz,  $\text{CDCl}_3$ )  $\delta$  159.0, 158.2, 153.3, 149.0, 135.8, 128.8 (2C), 128.6, 128.4 (2C), 125.3, 122.5, 121.4, 114.0, 113.3, 108.9, 67.5, 66.8, 56.4, 45.4 (2C), 27.4, 8.2. IR (film)  $\nu_{\text{max}}$  3404, 3323, 2978, 2943, 2816, 2768, 1713, 1610, 1524, 1381, 1366, 1273, 1227, 1204, 1109, 1022  $\text{cm}^{-1}$ . HRMS (ESI<sup>+</sup>)  $m/z$ :  $[\text{M} + \text{H}^+]$  calcd for  $\text{C}_{23}\text{H}_{26}\text{N}_2\text{O}_5$ , 411.1920; found, 411.1918.

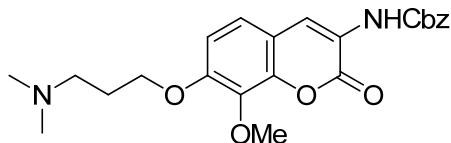

**Benzyl 7-(3-(dimethylamino)propoxy)-8-methoxy-2-oxo-2H-chromen-3-yl carbamate (81b).** Compound **81b** was obtained as a brown white amorphous foam (39 mg, 92%). <sup>1</sup>H NMR (400MHz,  $\text{CDCl}_3$ ):  $\delta$  8.25 (s, 1H), 7.55 (s, 1H), 7.41–7.30 (m, 5H), 7.14 (d,  $J = 8.4$  Hz, 1H), 6.91 (d,  $J = 8.4$  Hz, 1H), 5.23 (s, 2H), 4.16 (t,  $J = 5.8$  Hz, 2H), 3.97 (s, 3H), 2.68 (t,  $J = 5.8$  Hz, 2H), 2.41 (s, 6H), 2.13 (m, 2H). <sup>13</sup>C NMR (100 MHz,  $\text{CDCl}_3$ )  $\delta$  158.3, 153.2, 153.0, 143.8, 136.4, 135.6, 128.7 (2C), 128.5, 128.2 (2C), 122.1, 121.93, 121.86, 114.4, 110.9, 67.5, 67.4, 61.5, 56.1,

45.0 (2C), 26.9. IR (film)  $\nu_{max}$  3406, 3310, 2937, 2813, 2766, 1697, 1631, 1608, 1537, 1271, 1229, 1213, 1113, 1024.  $\text{cm}^{-1}$ . HRMS (ESI<sup>+</sup>)  $m/z$ : [M + H<sup>+</sup>] calcd for C<sub>23</sub>H<sub>27</sub>N<sub>2</sub>O<sub>6</sub>, 427.1869; found, 427.1861.

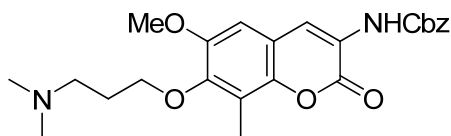

**Benzyl 7-(3-(dimethylamino)propoxy)-6-methoxy-8-methyl-2-oxo-2H-chromen-3-ylcarbamate (81c).** Compound **81c** was obtained as a white amorphous solid (77 mg, 60%). <sup>1</sup>H NMR (400MHz, CDCl<sub>3</sub>):  $\delta$  8.20 (s, 1H), 7.62 (s, 1H), 7.37–7.31 (m, 5H), 6.72 (s, 1H), 5.19 (s, 2H), 4.01 (t,  $J = 5.7$  Hz, 2H), 3.83 (s, 3H), 2.55 (t,  $J = 5.7$  Hz, 2H), 2.32 (s, 3H), 2.29 (s, 6H), 1.99–1.96 (m, 2H). <sup>13</sup>C NMR (100 MHz, CDCl<sub>3</sub>)  $\delta$  158.7, 153.1, 150.2, 147.9, 143.0, 135.6, 128.6 (2C), 128.5, 128.2 (2C), 122.8, 121.7, 120.2, 115.2, 106.1, 71.6, 67.4, 56.4, 55.9, 45.3 (2C), 28.3, 8.9. IR (film)  $\nu_{max}$  3404, 3313, 2953, 2820, 2770, 1709, 1524, 1464, 1389, 1298, 1229, 1204, 1090, 1024  $\text{cm}^{-1}$ . HRMS (ESI<sup>+</sup>)  $m/z$ : [M + H<sup>+</sup>] calcd for C<sub>24</sub>H<sub>29</sub>N<sub>2</sub>O<sub>6</sub>, 441.2026; found, 441.2018.

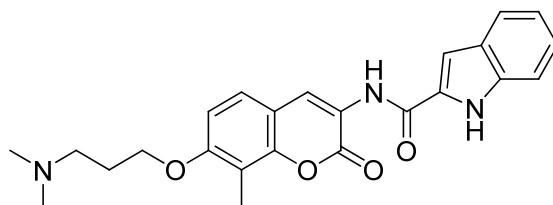

**N-(7-(3-(dimethylamino)propoxy)-8-methyl-2-oxo-2H-chromen-3-yl)-1H-indole-2-carboxamide (82a).** Compound **82a** was obtained as a brown amorphous solid (21 mg, 36%). <sup>1</sup>H NMR (500 MHz, DMSO-*d*<sub>6</sub>)  $\delta$  11.89 (s, 1H), 9.60 (s, 1H), 8.49 (s, 1H), 7.68 (d,  $J = 8.0$  Hz, 1H), 7.60 (d,  $J = 8.7$  Hz, 1H), 7.48 (d,  $J = 8.4$  Hz, 1H), 7.42 (s, 1H), 7.25 (t,  $J = 8.0$  Hz, 1H), 7.11–7.07 (m, 2H), 4.14 (t,  $J = 6.2$  Hz, 2H), 2.62 (m, 2H), 2.32 (s, 6H), 2.24 (s, 3H), 2.00–1.90 (m, 2H). <sup>13</sup>C NMR (125 MHz, DMSO-*d*<sub>6</sub>)  $\delta$  160.0, 158.22, 158.19, 149.5, 137.1, 130.5, 129.3, 127.0,

126.3, 124.2, 122.0, 120.8, 120.1, 112.7, 112.49, 112.46, 109.2, 105.0, 66.5, 55.2, 44.4 (2C), 26.1, 8.0. IR (film)  $\nu_{max}$  3375, 3319, 2926, 2854, 1711, 1649, 1580, 1535, 1412, 1390, 1327, 1265, 1111, 1063, 789  $\text{cm}^{-1}$ . HRMS (ESI<sup>+</sup>) m/z: [M + H<sup>+</sup>] calcd for C<sub>24</sub>H<sub>26</sub>N<sub>3</sub>O<sub>4</sub>, 420.1923; found, 420.1920. This material was determined to be 100% pure (Retention time = 12.1) by HPLC (ZORBAX Eclipse Plus 4.6 x 150 mm column eluting with 70% H<sub>2</sub>O (0.2% H<sub>3</sub>PO<sub>4</sub>)/30% MeCN → 52% H<sub>2</sub>O (0.2% H<sub>3</sub>PO<sub>4</sub>)/48% MeCN → 95% H<sub>2</sub>O (0.2% H<sub>3</sub>PO<sub>4</sub>)/5% MeCN → 70% H<sub>2</sub>O (0.2% H<sub>3</sub>PO<sub>4</sub>)/30% MeCN, flow rate 1.0 mL/min.

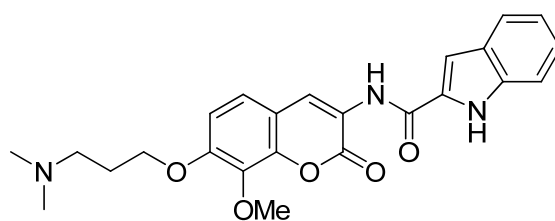

**N-(7-(3-(dimethylamino)propoxy)-8-methoxy-2-oxo-2H-chromen-3-yl)-1H-indole-2-carboxamide (82b).** Compound **82b** was obtained a brown amorphous solid (28 mg, 70%). <sup>1</sup>H NMR (500 MHz, CDCl<sub>3</sub>-CD<sub>3</sub>OD)  $\delta$  8.50 (s, 1H), 7.47 (m, 1H), 7.28 (m, 1H), 7.11–7.04 (m, 2H), 7.00 (s, 1H), 6.94–6.91 (m, 1H), 6.79–6.76 (m, 1H), 3.95 (t, *J* = 4.7 Hz, 2H), 3.78 (s, 3H), 2.52 (m, 2H), 2.23 (s, 3H), 2.22 (s, 3H), 1.92–1.88 (m, 2H). <sup>13</sup>C NMR (125 MHz, CDCl<sub>3</sub>/CD<sub>3</sub>OD)  $\delta$  164.5, 162.7, 157.3, 147.9, 141.4, 140.0, 133.8, 131.3, 128.9, 128.8, 126.8, 126.1, 125.5, 124.6, 118.4, 116.1, 114.8, 108.7, 71.1, 65.3, 59.9, 48.4 (2C), 30.4. IR (film)  $\nu_{max}$  3379, 3321, 2943, 2853, 1712, 1662, 1583, 1542, 1421, 1391, 1291, 1207, 1138, 1030 739  $\text{cm}^{-1}$ . HRMS (ESI<sup>+</sup>) m/z: [M + H<sup>+</sup>] calcd for C<sub>24</sub>H<sub>26</sub>N<sub>3</sub>O<sub>5</sub>, 436.1873; found, 436.1867. This material was determined to be 100% pure (Retention time = 8.25) by HPLC (ZORBAX Eclipse Plus 4.6 x 150 mm column eluting with 70% H<sub>2</sub>O (0.2% H<sub>3</sub>PO<sub>4</sub>)/30% MeCN → 52% H<sub>2</sub>O (0.2% H<sub>3</sub>PO<sub>4</sub>)/48% MeCN → 95% H<sub>2</sub>O (0.2% H<sub>3</sub>PO<sub>4</sub>)/5% MeCN → 70% H<sub>2</sub>O (0.2% H<sub>3</sub>PO<sub>4</sub>)/30% MeCN, flow rate 1.0 mL/min.

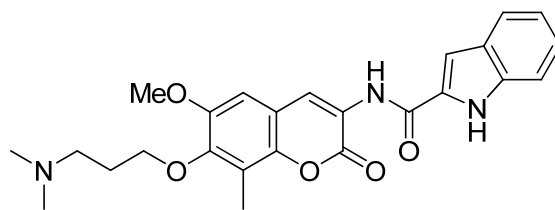

**N-(7-(3-(dimethylamino)propoxy)-6-methoxy-8-methyl-2-oxo-2H-chromen-3-yl)-1H-indole-2-carboxamide (82c).** Compound **82c** was obtained a brown amorphous solid (41 mg, 83%).  $^1\text{H}$  NMR (500 MHz,  $\text{CDCl}_3\text{-CD}_3\text{OD}$ )  $\delta$  8.37 (s, 1H), 7.34 (d,  $J = 8.0$  Hz, 1H), 7.17 (d,  $J = 8.0$  Hz, 1H), 6.97 (t,  $J = 8.0$  Hz, 1H), 6.89 (s, 1H), 6.81 (t,  $J = 8.0$  Hz, 1H), 6.60 (s, 1H). 3.74 (t,  $J = 5.6$  Hz, 2H), 3.60 (s, 3H), 2.67 (t,  $J = 5.6$  Hz, 2H), 2.29 (s, 6H), 1.80 (s, 3H), 1.80 (m, 2H).  $^{13}\text{C}$  NMR (125 MHz,  $\text{CDCl}_3/\text{CD}_3\text{OD}$ )  $\delta$  164.5, 163.1, 154.1, 151.7, 147.2, 141.4, 133.8, 131.3, 128.8, 128.4, 126.5, 125.9, 124.4, 123.9, 119.5, 116.0, 110.5, 108.6, 74.7, 60.1, 59.6, 47.7 (2C), 30.6, 12.3. IR (film)  $\nu_{\text{max}}$  3381, 3315, 2943, 2833, 1722, 1657, 1543, 1467, 1394, 1292, 1086, 1030 739  $\text{cm}^{-1}$ . HRMS (ESI $^+$ )  $m/z$ :  $[\text{M} + \text{H}^+]$  calcd for  $\text{C}_{25}\text{H}_{28}\text{N}_3\text{O}_5$ , 450.2029; found, 450.2031. This material was determined to be 96% pure (Retention time = 7.92) by HPLC (ZORBAX Eclipse Plus 4.6 x 150 mm column eluting with 70%  $\text{H}_2\text{O}$  (0.2%  $\text{H}_3\text{PO}_4$ )/30% MeCN  $\rightarrow$  52%  $\text{H}_2\text{O}$  (0.2%  $\text{H}_3\text{PO}_4$ )/48% MeCN  $\rightarrow$  95%  $\text{H}_2\text{O}$  (0.2%  $\text{H}_3\text{PO}_4$ )/5% MeCN  $\rightarrow$  70%  $\text{H}_2\text{O}$  (0.2%  $\text{H}_3\text{PO}_4$ )/30% MeCN, flow rate 1.0 mL/min.

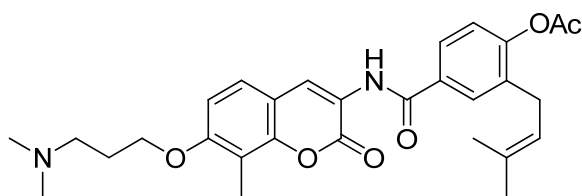

**4-(7-(3-(Dimethylamino)propoxy)-8-methyl-2-oxo-2H-chromen-3-ylcarbamoyl)-2-(3-methylbut-2-enyl)phenyl acetate (83a).** Compound **83a** was obtained as a white amorphous solid (79 mg, 77%).  $^1\text{H}$  NMR (500MHz,  $\text{CDCl}_3$ )  $\delta$  8.79 (s, 1H), 8.70 (s, 1H), 7.81 (s, 1H), 7.77(d,  $J = 8.3$  Hz, 1H), 7.34 (d,  $J = 8.6$  Hz, 1H), 7.18 (d,  $J = 8.3$  Hz, 1H), 6.88 (d,  $J = 8.6$  Hz,

1H), 5.25 (m, 1H), 4.15 (t,  $J = 6.0$  Hz, 2H), 3.32 (d,  $J = 7.2$  Hz, 2H), 2.77 (t,  $J = 7.4$  Hz, 2H), 2.49 (s, 6H), 2.35 (s, 3H), 2.33 (s, 3H), 2.17 (m, 2H), 1.77 (s, 3H), 1.73 (s, 3H).  $^{13}\text{C}$  NMR (125MHz,  $\text{CDCl}_3$ )  $\delta$  169.1, 165.6, 159.7, 158.4, 152.3, 149.4, 134.8, 134.5, 131.8, 129.6, 126.09, 126.05, 124.9, 123.1, 121.7, 120.9, 114.3, 113.6, 109.1, 66.7, 56.4, 45.0 (2C), 29.0, 26.8, 26.0, 21.1, 18.2, 8.4. IR (film)  $\nu_{\text{max}}$  3400, 3086, 3054, 2922, 2851, 1765, 1711, 1672, 1607, 1526, 1493, 1369, 1248, 1202, 1175, 1099, 1040  $\text{cm}^{-1}$ . HRMS (ESI<sup>+</sup>)  $m/z$ :  $[\text{M} + \text{H}^+]$  calcd for  $\text{C}_{29}\text{H}_{35}\text{N}_2\text{O}_6$ , 507.2495; found, 507.2501. This material was determined to be 100% pure (Retention time = 10.0) by HPLC (ZORBAX Eclipse Plus 4.6 x 150 mm column eluting with 70%  $\text{H}_2\text{O}$  (0.2%  $\text{H}_3\text{PO}_4$ )/30% MeCN  $\rightarrow$  52%  $\text{H}_2\text{O}$  (0.2%  $\text{H}_3\text{PO}_4$ )/48% MeCN  $\rightarrow$  95%  $\text{H}_2\text{O}$  (0.2%  $\text{H}_3\text{PO}_4$ )/5% MeCN  $\rightarrow$  70%  $\text{H}_2\text{O}$  (0.2%  $\text{H}_3\text{PO}_4$ )/30% MeCN, flow rate 1.0 mL/min.

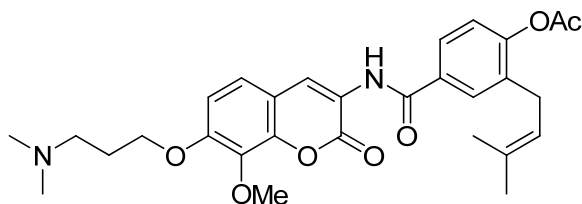

**4-(7-(3-(dimethylamino)propoxy)-8-methoxy-2-oxo-2H-chromen-3-ylcarbamoyl)-2-(3-methylbut-2-enyl)phenyl acetate (83b).** Compound **83b** was obtained as white amorphous solid (48 mg, 54%).  $^1\text{H}$  NMR (500 MHz,  $\text{CDCl}_3$ )  $\delta$  8.79 (s, 1H), 8.70 (s, 1H), 7.80 (d,  $J = 2.3$  Hz, 1H), 7.76 (dd,  $J = 8.4$  Hz, 2.3 Hz, 1H), 7.22 (d,  $J = 8.8$  Hz, 1H), 7.18 (d,  $J = 8.4$  Hz, 1H), 6.95 (d,  $J = 8.8$  Hz, 1H), 5.24 (m, 1H), 4.17 (t,  $J = 6.3$  Hz, 2H), 3.99 (s, 3H), 3.32 (d,  $J = 7.2$  Hz, 2H), 2.66 (t,  $J = 7.2$  Hz, 2H), 2.40 (s, 6H), 2.37 (s, 3H), 2.12 (m, 2H), 1.77 (s, 3H), 1.73 (s, 3H).  $^{13}\text{C}$  NMR (125 MHz,  $\text{CDCl}_3$ )  $\delta$  169.1, 165.7, 159.1, 153.7, 152.3, 144.3, 136.6, 134.9, 134.5, 131.7, 129.6, 126.1, 124.5, 123.1, 122.9, 122.1, 120.8, 114.6, 111.1, 67.6, 61.8, 56.3, 45.3 (2C), 29.0, 27.1, 25.9, 21.1, 18.2. IR (film)  $\nu_{\text{max}}$  3408, 3084, 3024, 2937, 2858, 1711, 1666, 1605, 1529,

1502, 1462, 1367, 1259, 1178, 1105, 1082, 1034  $\text{cm}^{-1}$ . HRMS ( $\text{ESI}^+$ )  $m/z$  calcd for  $[\text{M}+\text{H}^+]$   $\text{C}_{29}\text{H}_{35}\text{NO}_7$ , 523.2444; found, 523.2450.

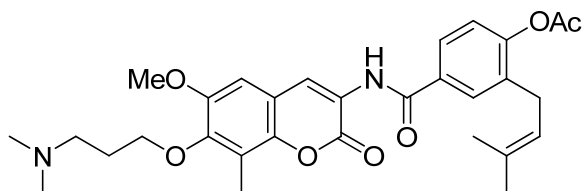

**4-(7-(3-(dimethylamino)propoxy)-6-methoxy-8-methyl-2-oxo-2H-chromen-3-ylcarbonyl)-2-(3-methylbut-2-enyl)phenyl acetate (83c).** Compound **83c** was obtained as white amorphous solid (81 mg, 70%).  $^1\text{H}$  NMR (500 MHz,  $\text{CDCl}_3$ )  $\delta$  8.78 (s, 1H), 8.75 (s, 1H), 7.81 (d,  $J = 2.2$  Hz, 1H), 7.77 (dd,  $J = 8.4, 2.2$  Hz, 1H), 7.18 (d,  $J = 8.4$  Hz, 1H), 6.84 (s, 1H), 5.24 (m, 1H), 4.06 (t,  $J = 6.1$  Hz, 2H), 3.90 (s, 3H), 3.32 (d,  $J = 7.2$  Hz, 2H), 2.89 (t,  $J = 7.5$  Hz, 2H), 2.55 (s, 6H), 2.37 (s, 3H), 2.35 (s, 3H), 2.15 (m, 2H), 1.77 (s, 3H), 1.73 (s, 3H).  $^{13}\text{C}$  NMR (125 MHz,  $\text{CDCl}_3$ )  $\delta$  169.1, 165.7, 159.5, 152.3, 150.4, 148.1, 143.6, 134.9, 134.5, 131.7, 129.6, 126.1, 124.1, 123.17, 123.14, 120.8, 120.6, 115.7, 106.7, 71.1, 56.5, 56.2, 44.7 (2C), 29.0, 27.4, 25.9, 21.1, 18.2, 9.2. IR (film)  $\nu_{\text{max}}$  3404, 3082, 2935, 2854, 1765, 1711, 1672, 1605, 1527, 1492, 1382, 1249, 1177, 1088, 1034  $\text{cm}^{-1}$ . HRMS ( $\text{ESI}^+$ )  $m/z$  calcd for  $[\text{M}+\text{H}^+]$   $\text{C}_{30}\text{H}_{37}\text{NO}_7$ , 537.2601; found, 537.2595. This material was determined to be 99% pure (Retention time = 10.8) by HPLC (ZORBAX Eclipse Plus 4.6 x 150 mm column eluting with 70%  $\text{H}_2\text{O}$  (0.2%  $\text{H}_3\text{PO}_4$ )/30% MeCN  $\rightarrow$  52%  $\text{H}_2\text{O}$  (0.2%  $\text{H}_3\text{PO}_4$ )/48% MeCN  $\rightarrow$  95%  $\text{H}_2\text{O}$  (0.2%  $\text{H}_3\text{PO}_4$ )/5% MeCN  $\rightarrow$  70%  $\text{H}_2\text{O}$  (0.2%  $\text{H}_3\text{PO}_4$ )/30% MeCN, flow rate 1.0 mL/min.

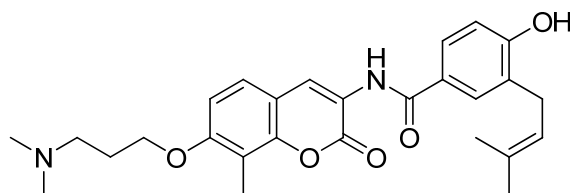



**N-(7-(3-(Dimethylamino)propoxy)-8-methyl-2-oxo-2H-chromen-3-yl)-4-hydroxy-3-(3-methylbut-2-enyl)benzamide (84a).** Compound **84a** was obtained as a white, amorphous solid (22 mg, 69%).  $^1\text{H}$  NMR (500MHz,  $\text{DMSO-}d_6$ )  $\delta$  10.19 (s, 1H), 9.24 (s, 1H), 8.47 (s, 1H), 7.68–7.66 (m, 2H), 7.56 (d,  $J = 8.7$  Hz, 1H), 7.07 (d,  $J = 8.7$  Hz, 1H), 6.89 (d,  $J = 8.7$  Hz, 1H), 5.31 (m, 1H), 4.13 (t,  $J = 6.2$  Hz, 2H), 3.27 (d,  $J = 7.2$  Hz, 2H), 2.47 (t,  $J = 6.9$  Hz, 2H), 2.22 (s, 6H), 2.21 (s, 3H), 1.92 (m, 2H), 1.71 (s, 3H), 1.70 (s, 3H).  $^{13}\text{C}$  NMR (125MHz,  $\text{DMSO-}d_6$ )  $\delta$  165.3, 158.7, 158.4, 158.1, 149.3, 131.8, 129.2, 128.1, 127.6, 126.8, 126.1, 124.0, 122.3, 121.2, 114.5, 112.7, 112.4, 109.1, 66.6, 55.5, 45.0 (2C), 27.9, 26.6, 25.5, 17.7, 7.9. IR (film)  $\nu_{\text{max}}$  3408, 2961, 2928, 1709, 1666, 1607, 1529, 1504, 1367, 1256, 1178, 1109  $\text{cm}^{-1}$ . HRMS (ESI $^+$ )  $m/z$ :  $[\text{M} + \text{H}^+]$  calcd for  $\text{C}_{27}\text{H}_{33}\text{N}_2\text{O}_5$ , 465.2389; found, 465.2388. This material was determined to be 100% pure (Retention time = 9.83) by HPLC (ZORBAX Eclipse Plus 4.6 x 150 mm column eluting with 70%  $\text{H}_2\text{O}$  (0.2%  $\text{H}_3\text{PO}_4$ )/30% MeCN  $\rightarrow$  52%  $\text{H}_2\text{O}$  (0.2%  $\text{H}_3\text{PO}_4$ )/48% MeCN  $\rightarrow$  95%  $\text{H}_2\text{O}$  (0.2%  $\text{H}_3\text{PO}_4$ )/5% MeCN  $\rightarrow$  70%  $\text{H}_2\text{O}$  (0.2%  $\text{H}_3\text{PO}_4$ )/30% MeCN, flow rate 1.0 mL/min.

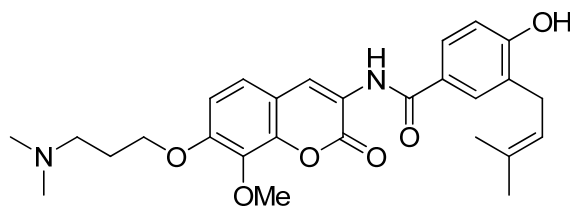

**N-(7-(3-(dimethylamino)propoxy)-8-methoxy-2-oxo-2H-chromen-3-yl)-4-hydroxy-3-(3-methylbut-2-enyl)benzamide (84b).** Compound **84b** was obtained as a white amorphous solid (16 mg, 79%).  $^1\text{H}$  NMR (500MHz,  $\text{DMSO-}d_6$ )  $\delta$  10.23 (bs, 1H), 9.27 (s, 1H), 8.48 (s, 1H), 7.68–7.66 (m, 2H), 7.44 (d,  $J = 8.9$  Hz, 1H), 7.13 (d,  $J = 8.8$  Hz, 1H), 6.91 (d,  $J = 8.8$  Hz, 1H), 5.30 (m, 1H), 4.16 (t,  $J = 6.2$  Hz, 2H), 3.87 (s, 3H), 3.27 (d,  $J = 7.2$  Hz, 2H), 2.62 (m, 2H), 2.31 (s, 6H), 1.76 (s, 3H), 1.70 (s, 3H).  $^{13}\text{C}$  NMR (125MHz,  $\text{DMSO-}d_6$ )  $\delta$  165.4, 158.8, 158.0, 153.1, 144.1, 135.3, 131.9, 129.3, 127.7, 126.9, 123.9, 122.9, 122.3 (2C), 121.8, 114.6, 113.8, 110.9,

66.9, 60.9, 55.2, 44.5 (2C), 27.9, 26.1, 25.5, 17.7. IR (film)  $\nu_{max}$  3410, 3319, 3086, 2960, 2878, 1711, 1666, 1605, 1529, 1504, 1462, 1367, 1259, 1178, 1105, 1084  $\text{cm}^{-1}$ . HRMS (ESI<sup>+</sup>) m/z: [M + H<sup>+</sup>] calcd for C<sub>27</sub>H<sub>33</sub>N<sub>2</sub>O<sub>6</sub>, 481.2339; found, 481.2338. This material was determined to be 100% pure (Retention time = 9.11) by HPLC (ZORBAX Eclipse Plus 4.6 x 150 mm column eluting with 70% H<sub>2</sub>O (0.2% H<sub>3</sub>PO<sub>4</sub>)/30% MeCN → 52% H<sub>2</sub>O (0.2% H<sub>3</sub>PO<sub>4</sub>)/48% MeCN → 95% H<sub>2</sub>O (0.2% H<sub>3</sub>PO<sub>4</sub>)/5% MeCN → 70% H<sub>2</sub>O (0.2% H<sub>3</sub>PO<sub>4</sub>)/30% MeCN, flow rate 1.0 mL/min.

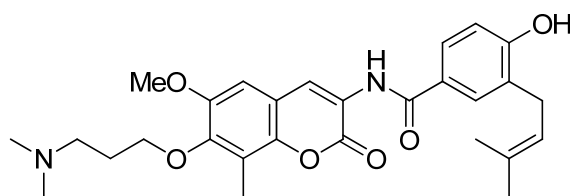

**N-(7-(3-(dimethylamino)propoxy)-6-methoxy-8-methyl-2-oxo-2H-chromen-3-yl)-4-hydroxy-3-(3-methylbut-2-enyl)benzamide (84c).** Compound **84c** was obtained as a white amorphous solid (23 mg, 58%). <sup>1</sup>H NMR (500MHz, DMSO-*d*<sub>6</sub>)  $\delta$  10.25 (bs, 1H), 9.22 (s, 1H), 8.54 (s, 1H), 7.67–7.66 (m, 2H), 7.27 (s, 1H), 6.92 (dd, *J* = 6.5, 2.4 Hz, 1H), 5.30 (m, 1H), 3.98 (t, *J* = 6.3 Hz, 2H), 3.85 (s, 3H), 3.27 (d, *J* = 7.2 Hz, 2H), 2.56 (t, *J* = 7.1 Hz, 2H), 2.27 (s, 3H), 2.26 (s, 6H), 1.89 (m, 2H), 1.71 (s, 3H), 1.70 (s, 3H). <sup>13</sup>C NMR (125MHz, DMSO-*d*<sub>6</sub>)  $\delta$  165.3, 158.9, 158.3, 149.7, 147.5, 143.2, 131.9, 129.1, 127.7, 126.9, 126.4, 123.9, 122.9, 122.3, 118.9, 114.9, 114.6, 107.5, 70.9, 56.0, 55.4, 44.6 (2C), 27.9, 27.3, 25.5, 17.7, 8.7. IR (film)  $\nu_{max}$  3406, 3082 (broad), 2962, 2856, 1709, 1670, 1603, 1526, 1502, 1378, 1257, 1176, 1090, 1043, 758  $\text{cm}^{-1}$ . HRMS (ESI<sup>+</sup>) m/z: [M + H<sup>+</sup>] calcd for C<sub>28</sub>H<sub>35</sub>N<sub>2</sub>O<sub>6</sub>, 495.2495; found, 495.2498. This material was determined to be 100% pure (Retention time = 8.48) by HPLC (ZORBAX Eclipse Plus 4.6 x 150 mm column eluting with 70% H<sub>2</sub>O (0.2% H<sub>3</sub>PO<sub>4</sub>)/30% MeCN → 52% H<sub>2</sub>O (0.2%

H<sub>3</sub>PO<sub>4</sub>/48% MeCN → 95% H<sub>2</sub>O (0.2% H<sub>3</sub>PO<sub>4</sub>)/5% MeCN → 70% H<sub>2</sub>O (0.2% H<sub>3</sub>PO<sub>4</sub>)/30% MeCN, flow rate 1.0 mL/min.

**Anti-proliferation assays.** Cells were maintained in a 1:1 mixture of Advanced DMEM/F12 (Gibco) supplemented with non-essential amino acids, L-glutamine (2 mM), streptomycin (500 µg/mL), penicillin (100 units/mL), and 10% FBS. Cells were grown to confluence in a humidified atmosphere (37° C, 5% CO<sub>2</sub>), seeded (2000/well, 100 µL) in 96-well plates, and allowed to attach overnight. Compound or GDA at varying concentrations in DMSO (1% DMSO final concentration) was added, and cells were returned to the incubator for 72 h. At 72 h, the number of viable cells was determined using an MTS/PMS cell proliferation kit (Promega) per the manufacturer's instructions. Cells incubated in 1% DMSO were used at 100% proliferation, and values were adjusted accordingly. IC<sub>50</sub> values were calculated from separate experiments performed in triplicate using GraphPad Prism.

**Western blot Analyses.** MCF-7 cells were cultured as described above and treated with various concentrations of drug, GDA in DMSO (1% DMSO final concentration), or vehicle (DMSO) for 24 h. Cells were harvested in cold PBS and lysed in RIPA lysis buffer containing 1 mM PMSF, 2 mM sodium orthovanadate, and protease inhibitors on ice for 1 h. Lysates were clarified at 14000g for 10 min at 4° C. Protein concentrations were determined using the Pierce BCA protein assay kit per the manufacturer's instructions. Equal amounts of protein (20 µg) were electrophoresed under reducing conditions, transferred to a nitrocellulose membrane, and immunoblotted with the corresponding specific antibodies. Membranes were incubated with an

appropriate horseradish peroxidase-labeled secondary antibody, developed with a chemiluminescent substrate, and visualized.

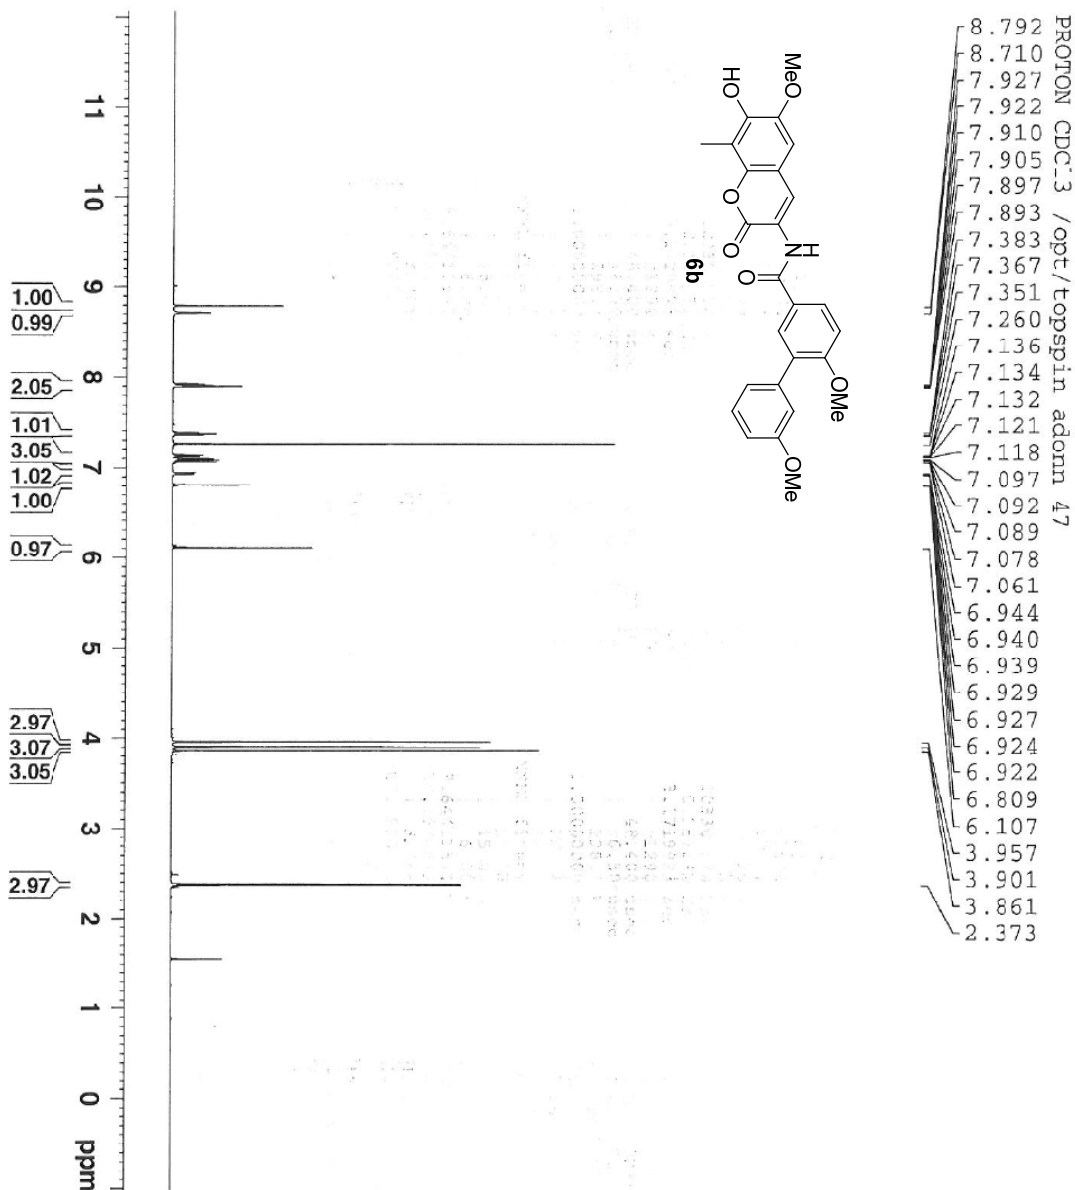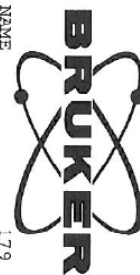

```

NAME 179
EXPNO 1
PROCNO 1
Date_ 20101201
Time 16.23
INSTRUM spect
PROBHD 5 mm CPDUL13C
PULPROG zg30
TD 65536
SOLVENT CDCl3
NS 16
DS 2
SWEH 10330.578 Hz
FIDRES 0.157632 Hz
AQ 3.171923 sec
RG 1290
KW 48.400 usec
DE 6.50 usec
TE 298.3 K
D1 1.00000000 sec
TDO 1
===== CHANNEL #1 =====
NUC1 1H
P1 15.00 usec
PL1 6.00 dB
PR1W 8.64411585 W
SF01 500.1390889 MHz
SI 32768
SF 500.1390115 MHz
WDW EM
SSB 0
LB 0.30 Hz
GB 0
PC 1.00
    
```

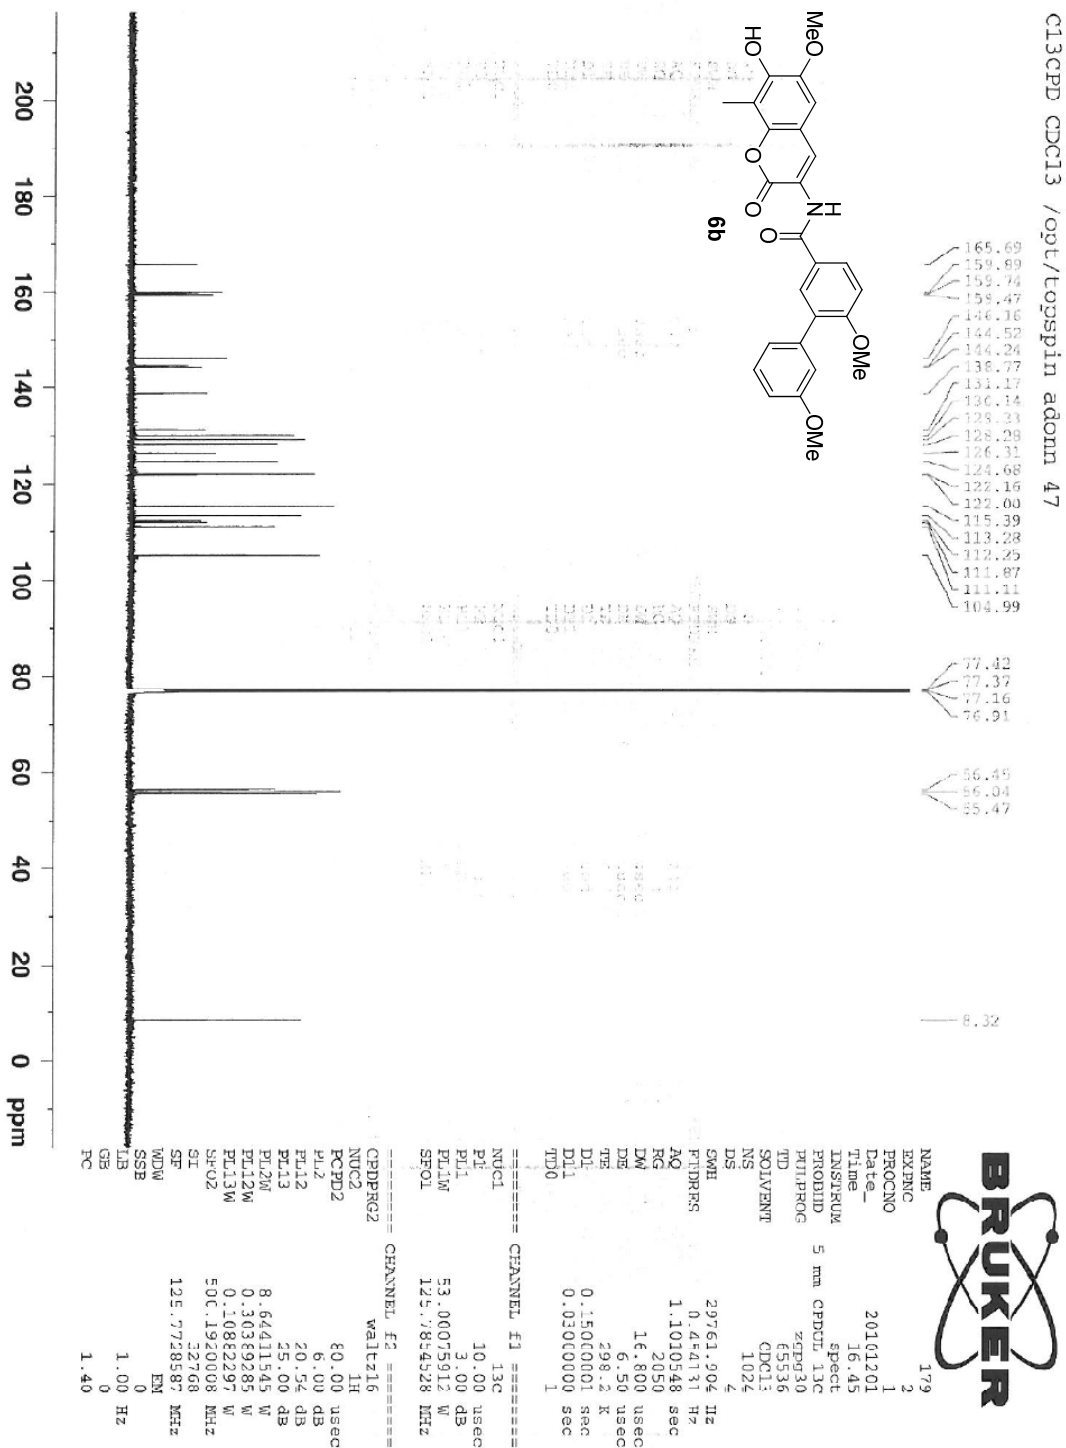

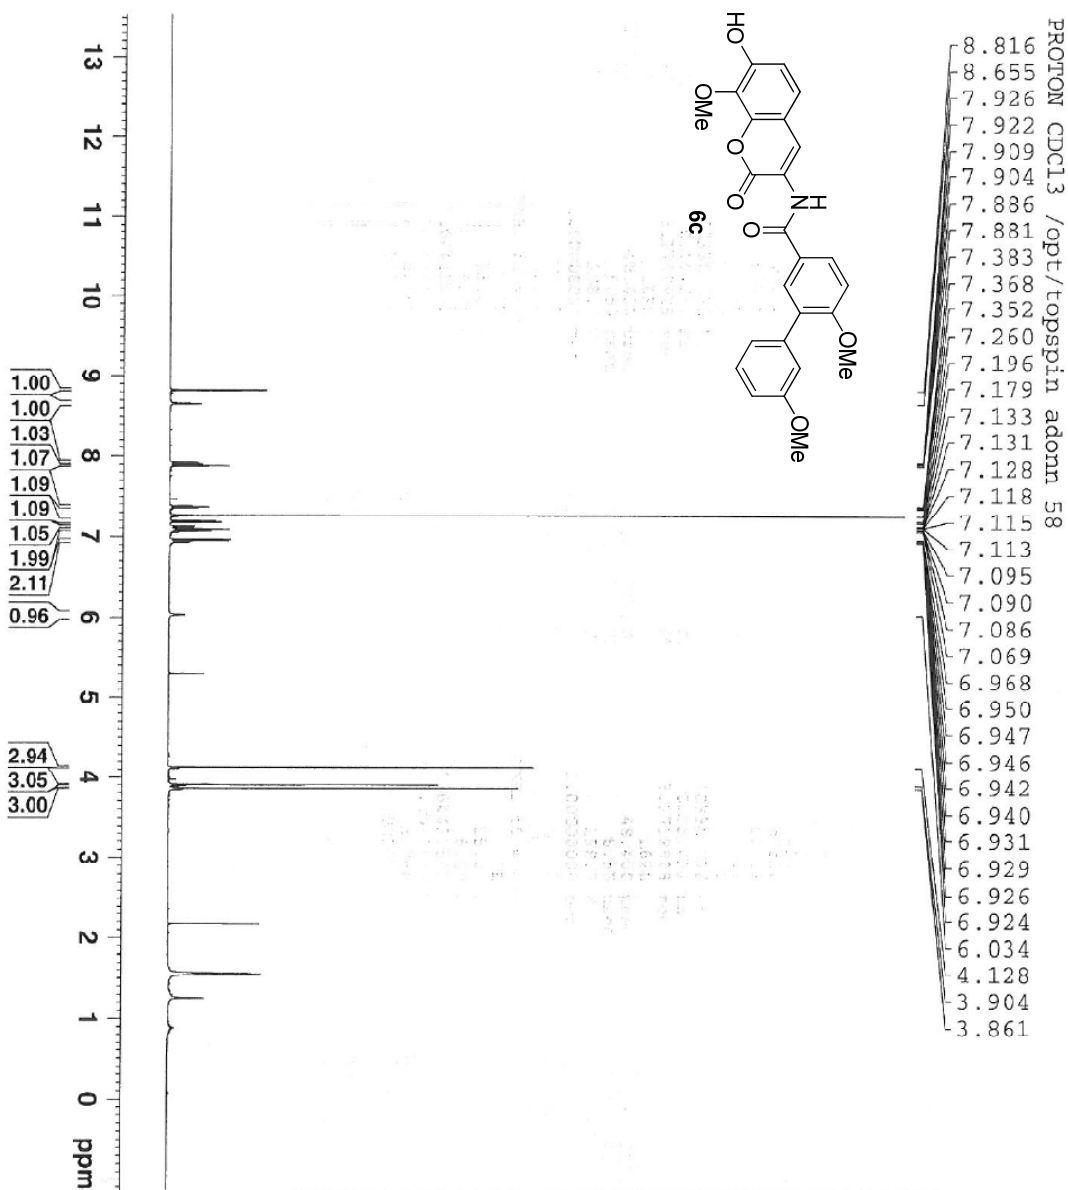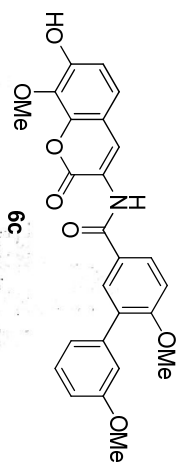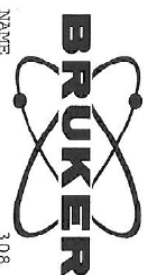

NAME 308  
EXPNO 1  
PROCNO 1  
Date\_ 20101117  
Time 11.51  
INSTRUM spect  
PROBHD 5 mm CPDIL JJC  
PULPROG zg30  
TD 65536  
SOLVENT CDCl<sub>3</sub>  
NS 16  
DS 2  
SWH 10330.578 Hz  
FIDRES 0.157632 Hz  
AQ 3.171923 sec  
RG 1620  
DE 48.400 usec  
TE 298.2 K  
D1 1.00000000 sec  
TD 1

===== CHANNEL f1 =====  
NUC1 1H  
P1 15.00 usec  
PL1 6.00 dB  
PL1W 8.64411545 W  
SFO1 500.1330889 MHz  
SI 32768  
SF 500.1300016 MHz  
WDW EM  
SSB 0  
GB 0  
PC 1.00

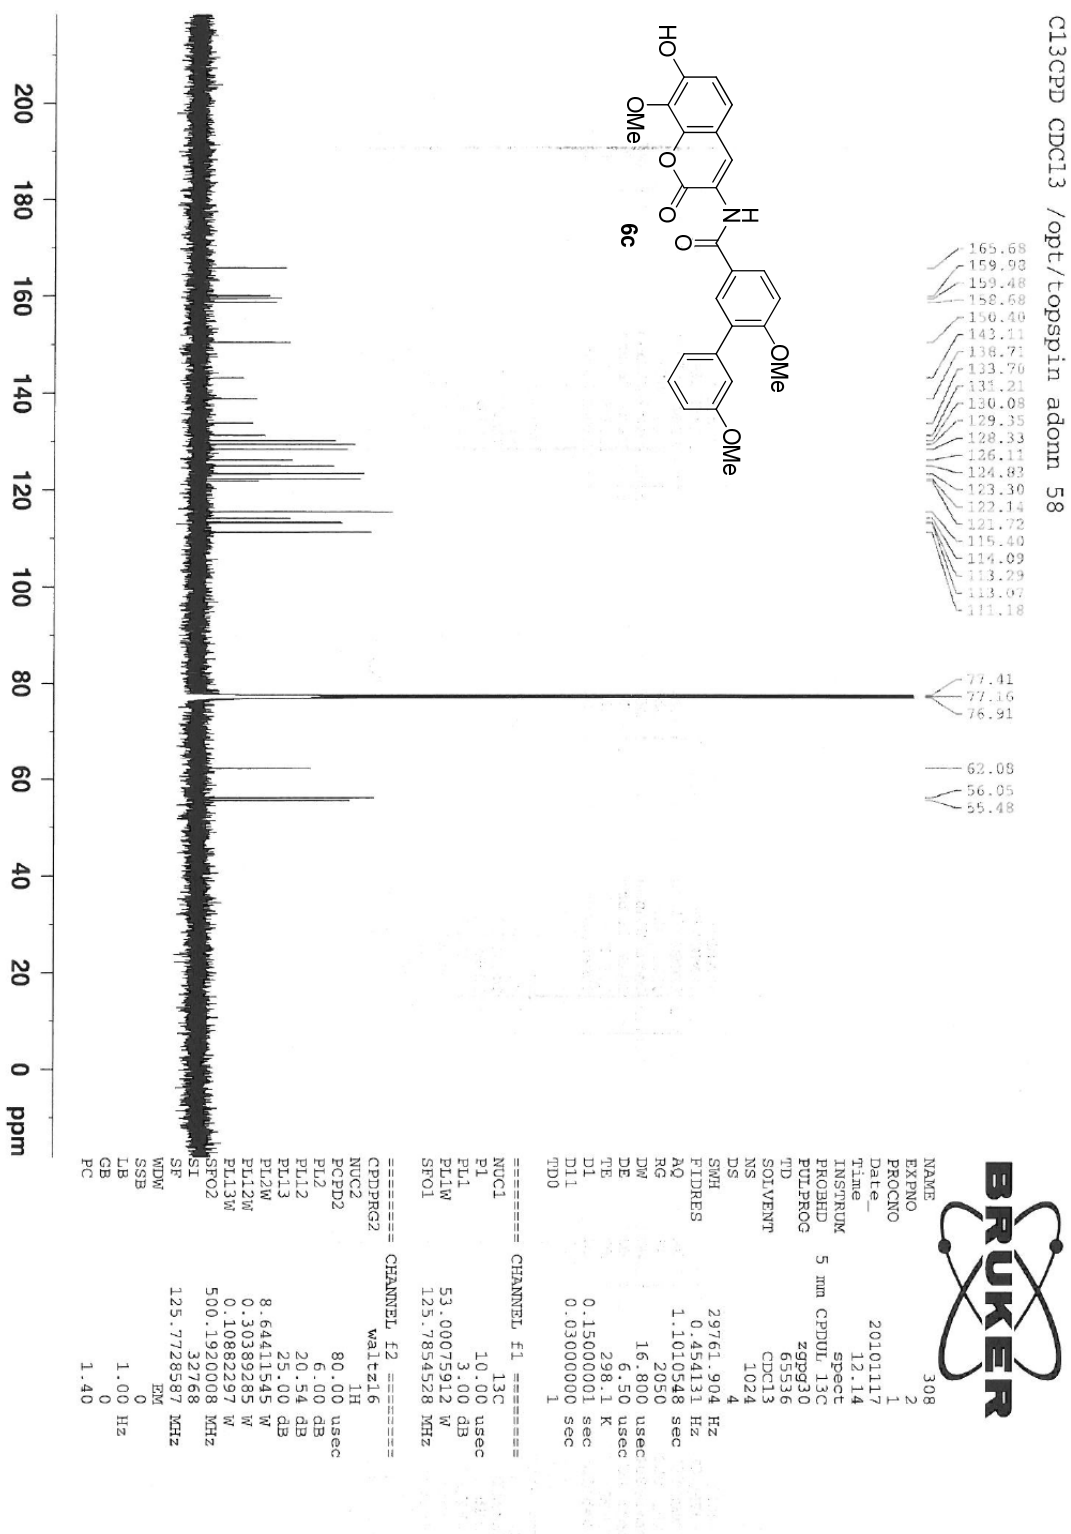



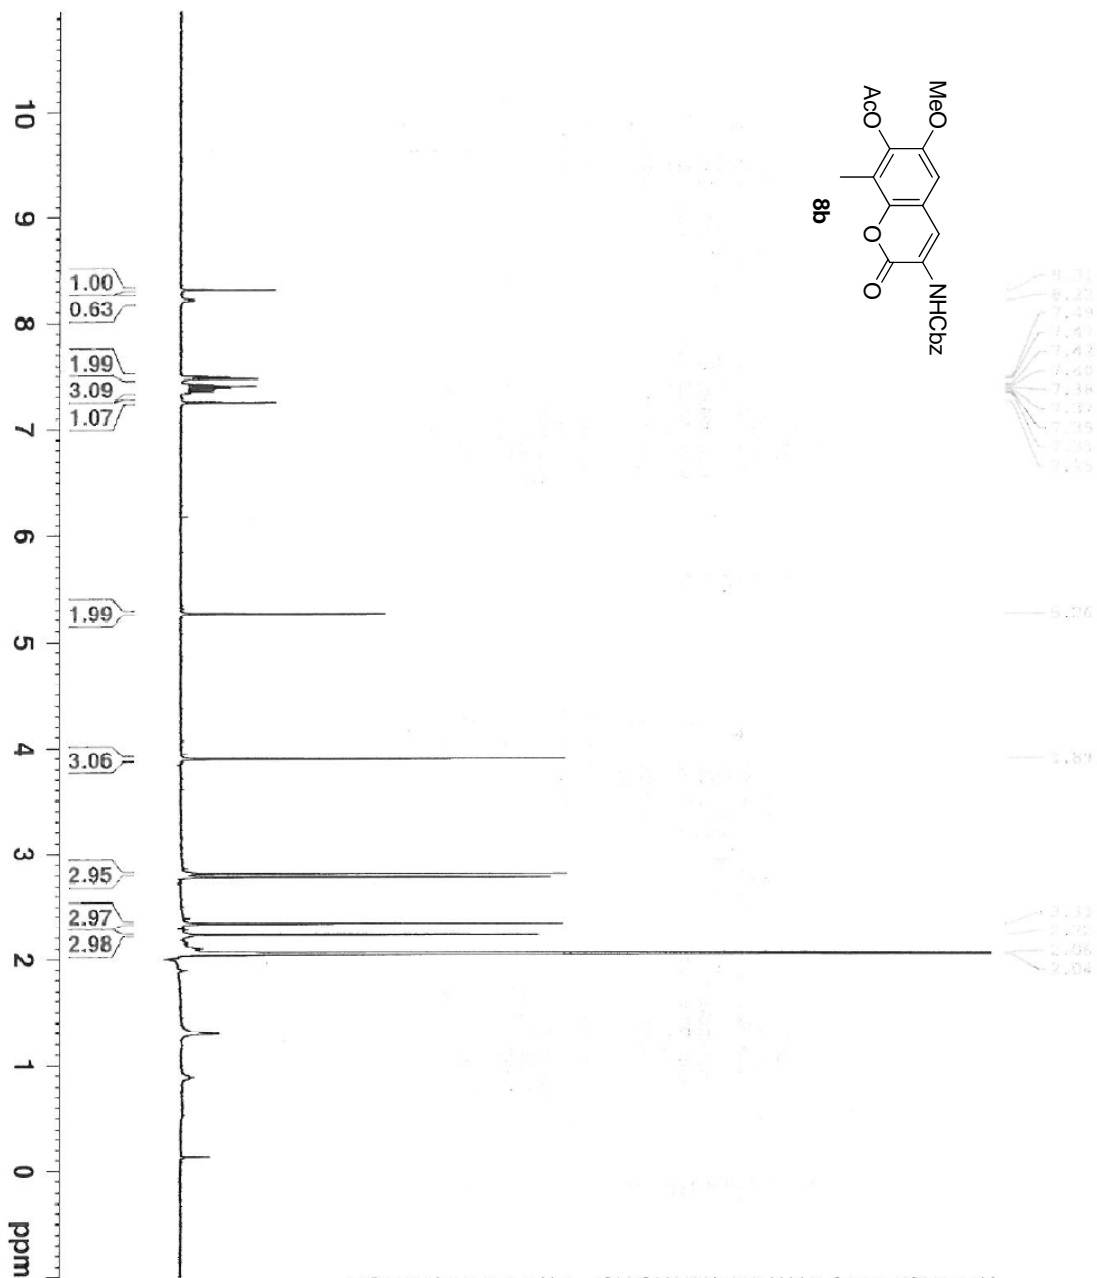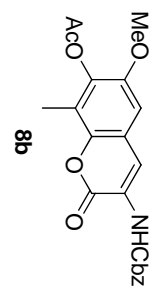

```

NAME OMe-coumarin acetate
EXPNO 1
PROCNO 1
Date_ 20070118
Time 17.08
INSTRUM dxx400
PROBHD 5 mm QNP 1H/13
PULPROG zg30
TD 65536
SOLVENT Acetone
NS 16
DS 2
SWH 8278.146 Hz
FIDRES 0.126314 Hz
AQ 3.9584243 sec
RG 724.1
DW 60.400 usec
DE 6.00 usec
TE 298.2 K
D1 1.00000000 sec
TDC 1

===== CHANNEL f1 =====
NUC1 1H
P1 10.50 usec
PL1 -5.00 dB
SFO1 400.1324710 MHz
SI 32768
SF 400.1300027 MHz
WDW EM
SSB 0
LB 0.30 Hz
GB 0
PC 1.00
    
```

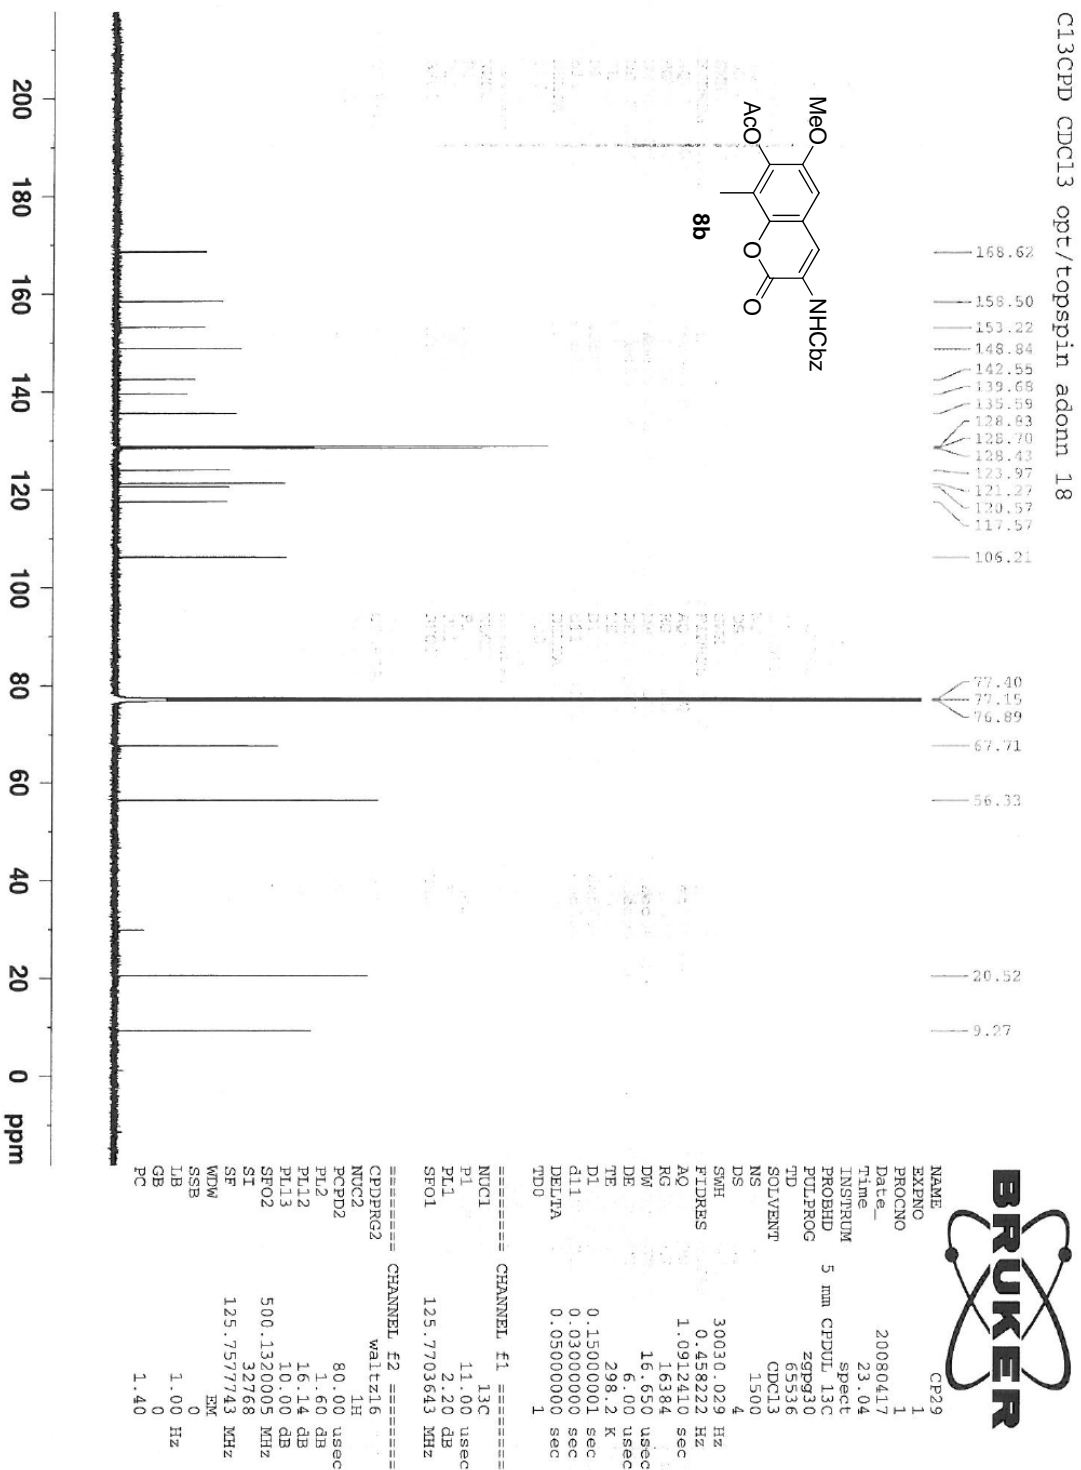

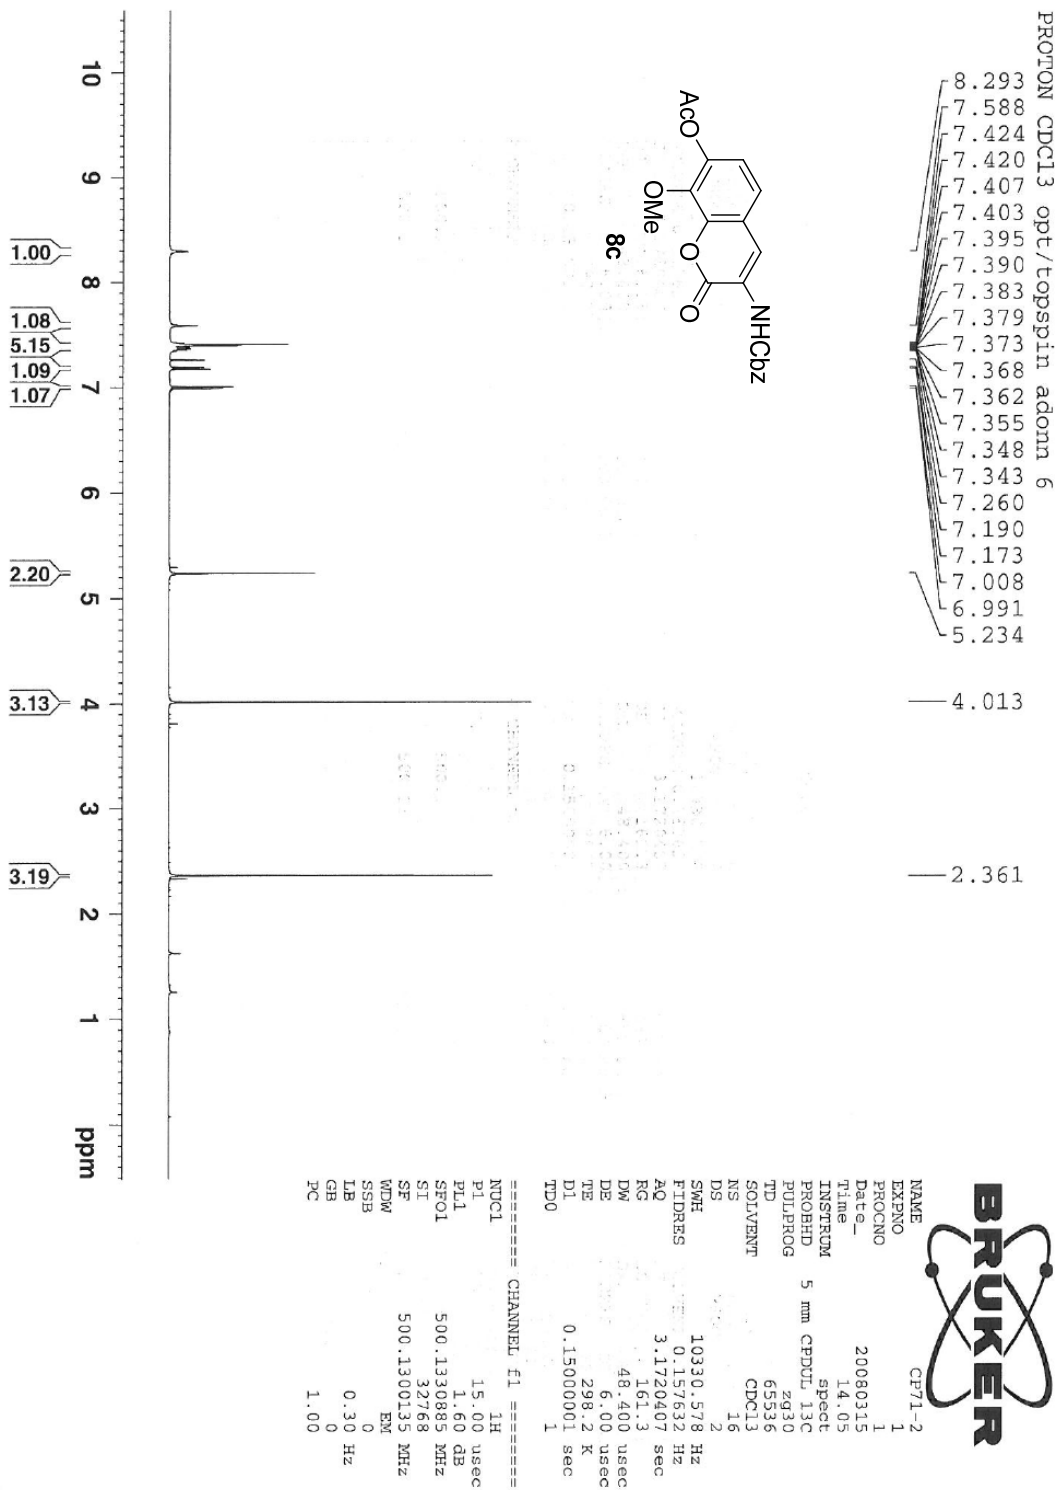

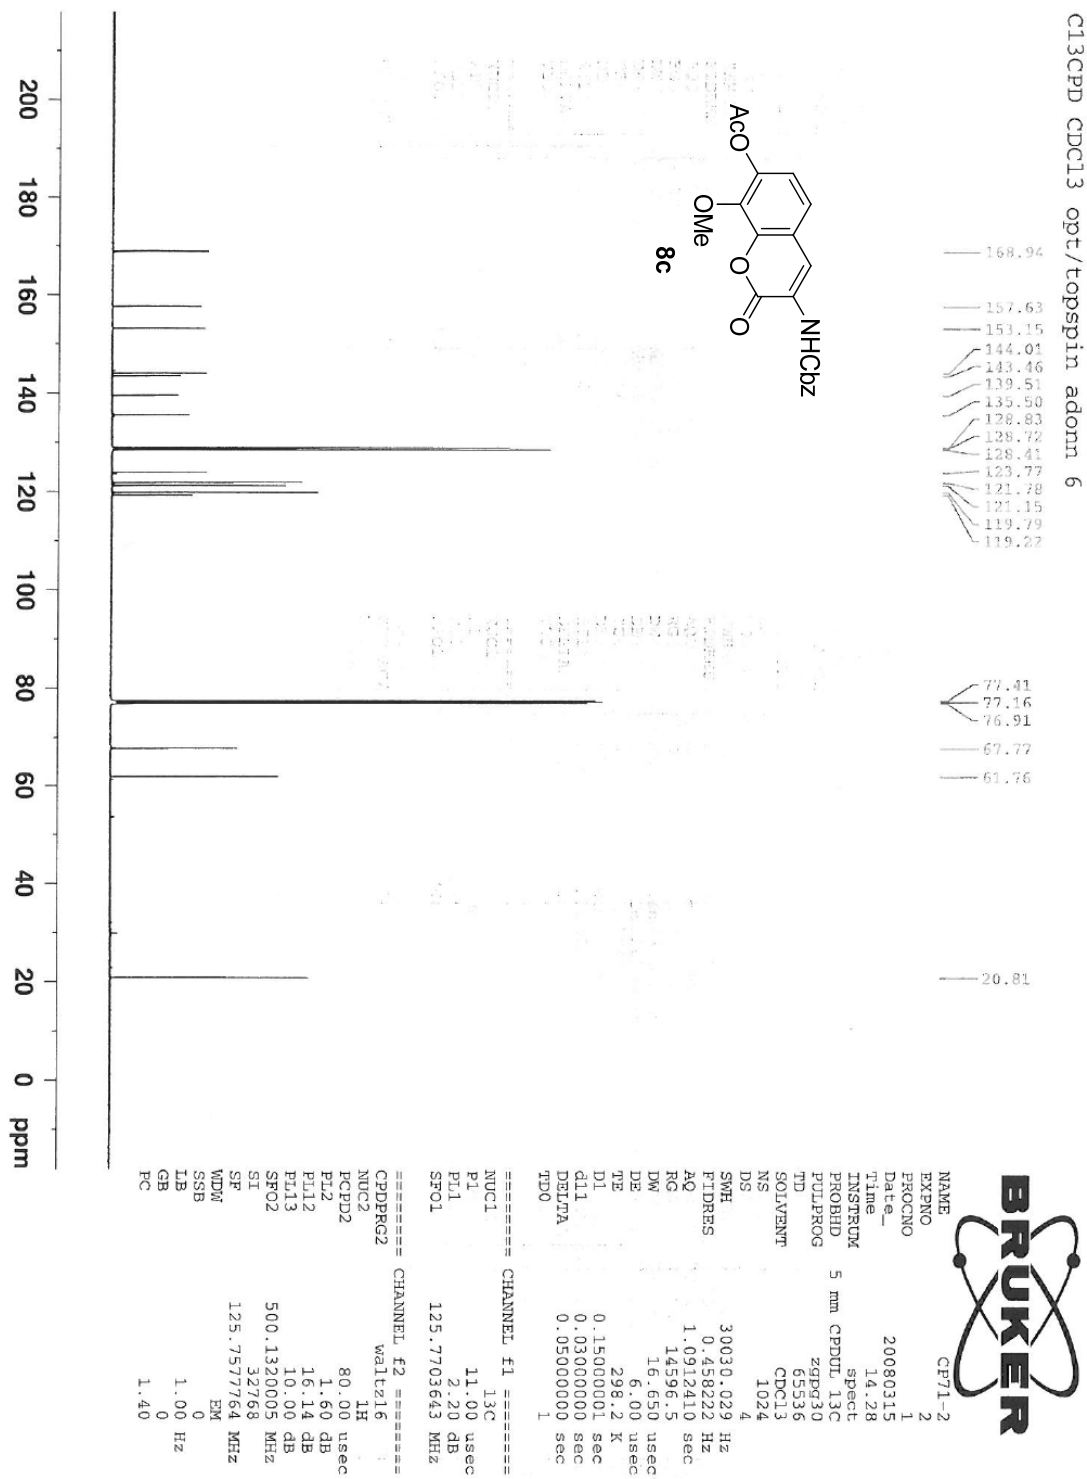

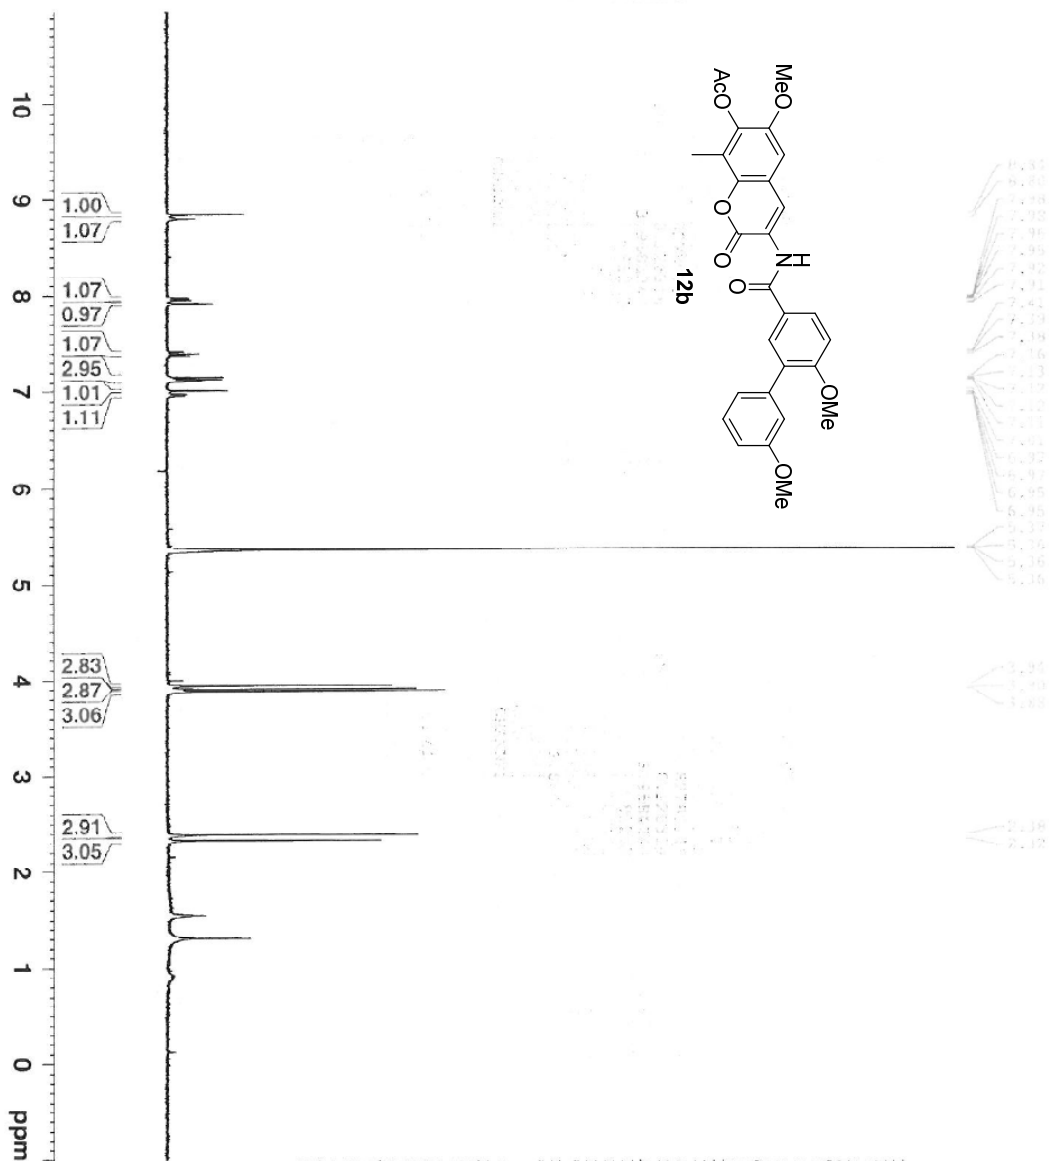

```

NAME OMe-OAc-TSC (HPLC)
EXPNO 1
PROCNO 1
Date_ 20070409
Time 19.31
INSTRUM dx400
PROBHD 5 mm QNP 1H/13
PULPROG zg30
TE 65536
SOLVENT CD2Cl2
NS 16
DS 2
SWH 8278.46 Hz
FIDRES 0.126314 Hz
AQ 3.9584243 sec
RG 812.7
DW 60.400 usec
DE 6.00 usec
TE 298.2 K
D1 1.00000000 sec
TD0 1

===== CHANNEL f1 =====
NUC1 1H
P1 10.50 usec
PT1 -5.00 dB
SFO1 400.1324710 MHz
SI 32768
SF 400.1300000 MHz
WDW EM
SSB 0
GB 0
PC 1.00
    
```

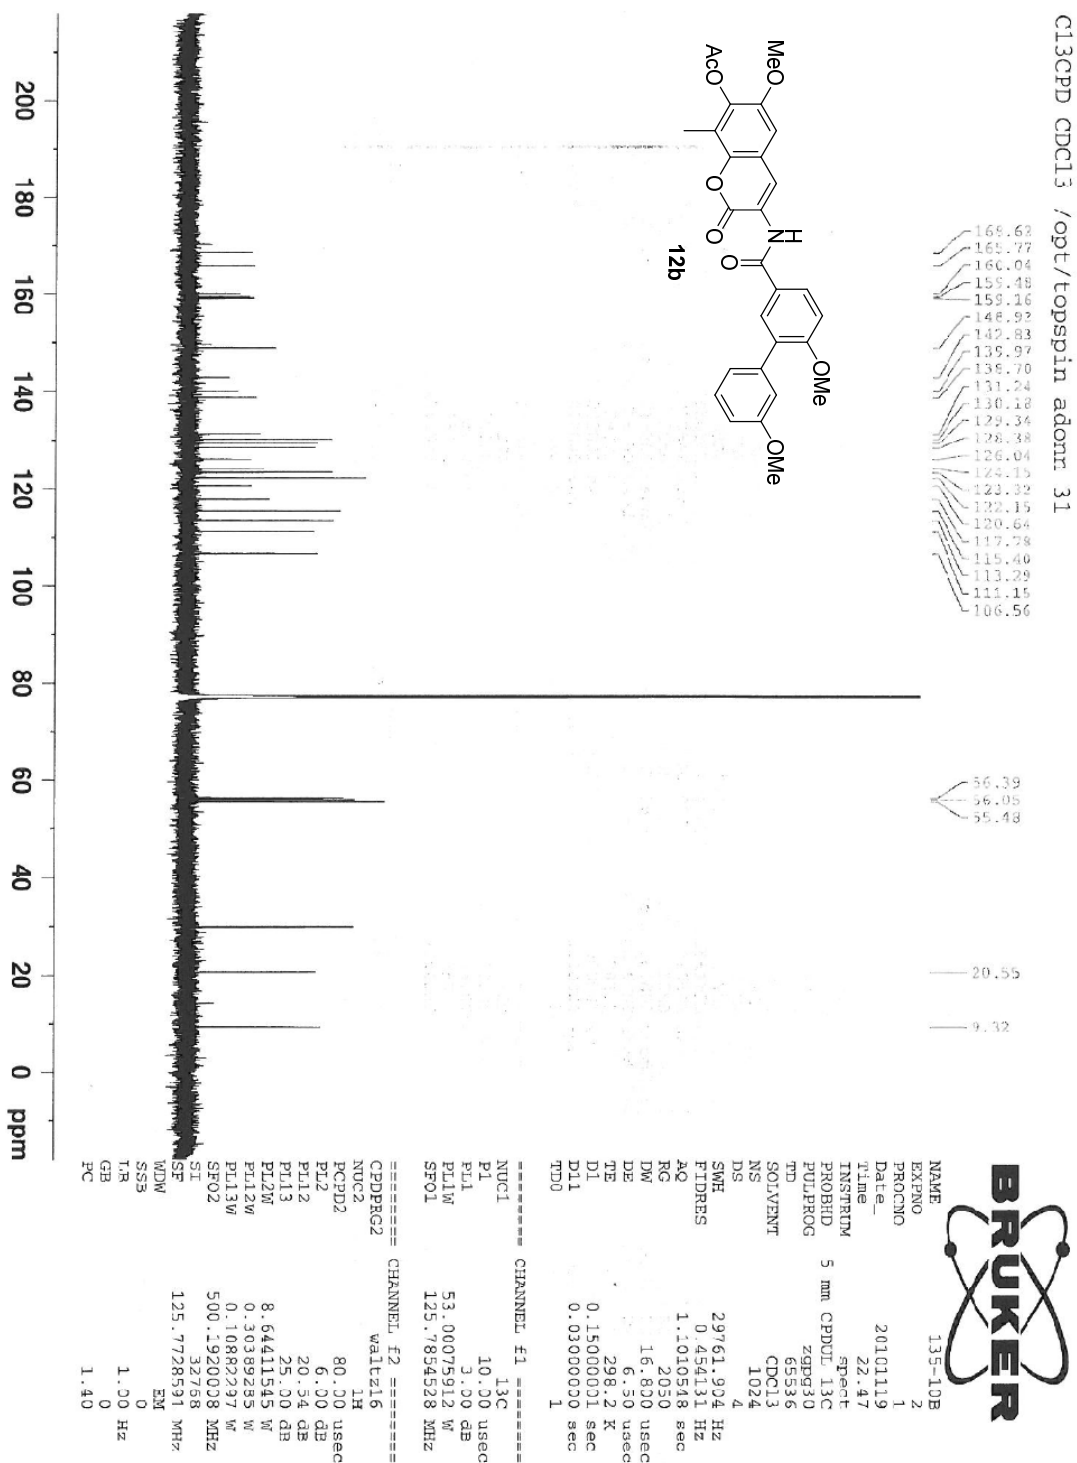

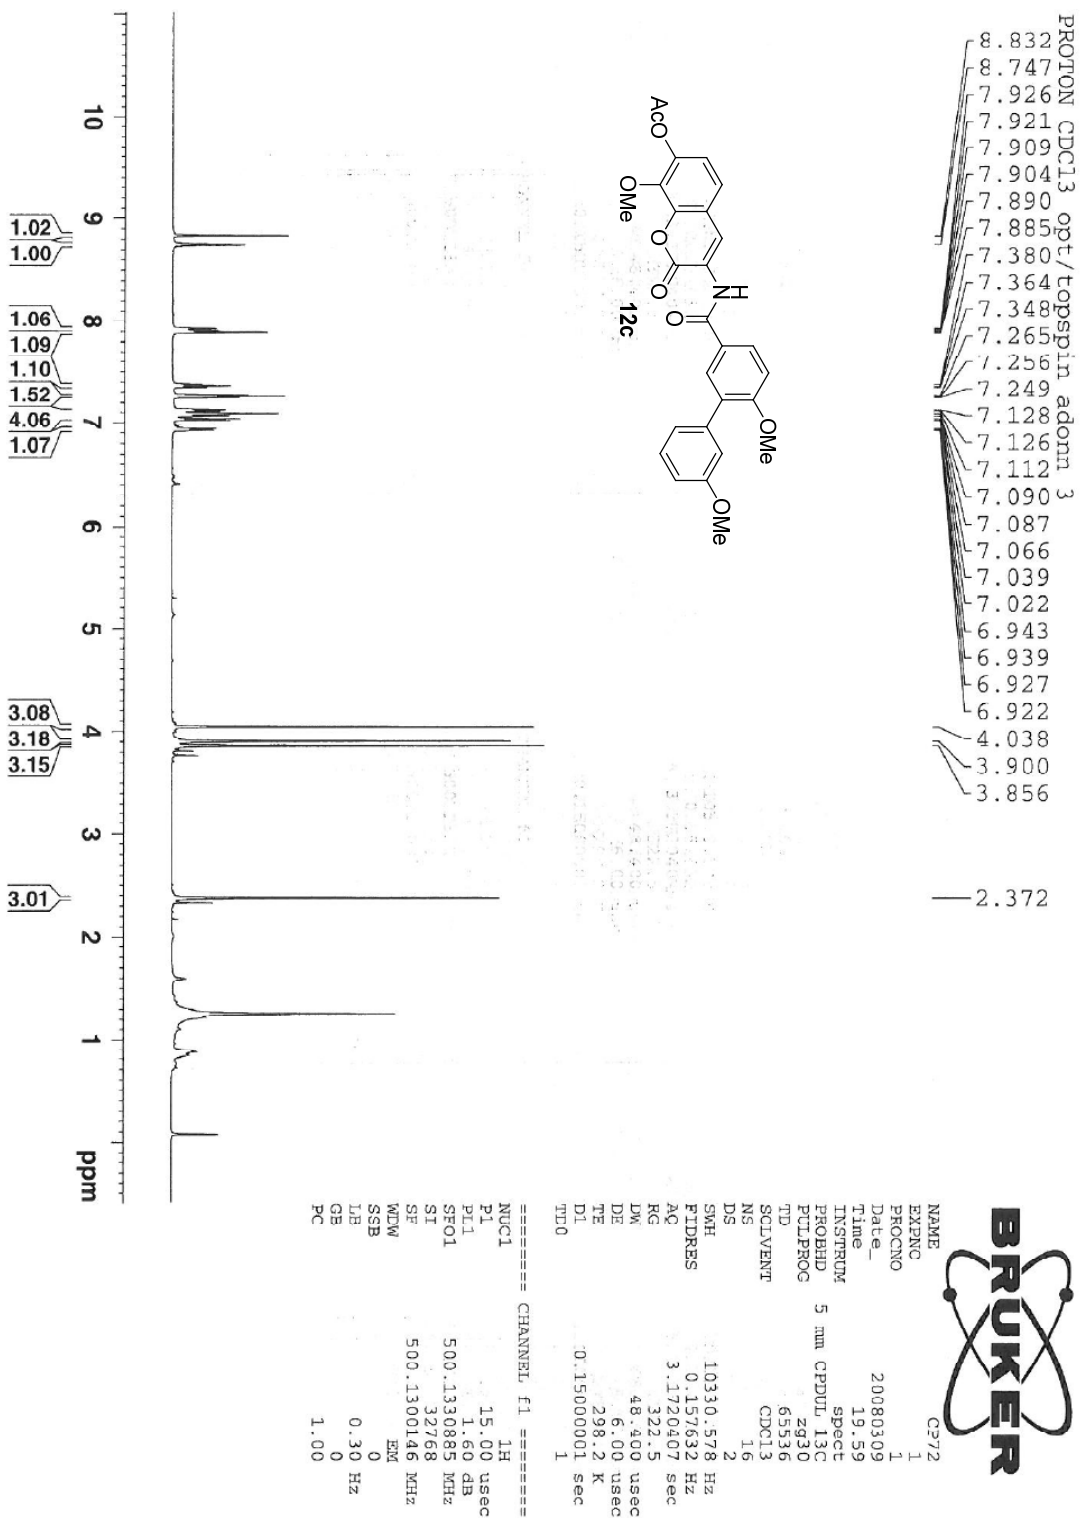

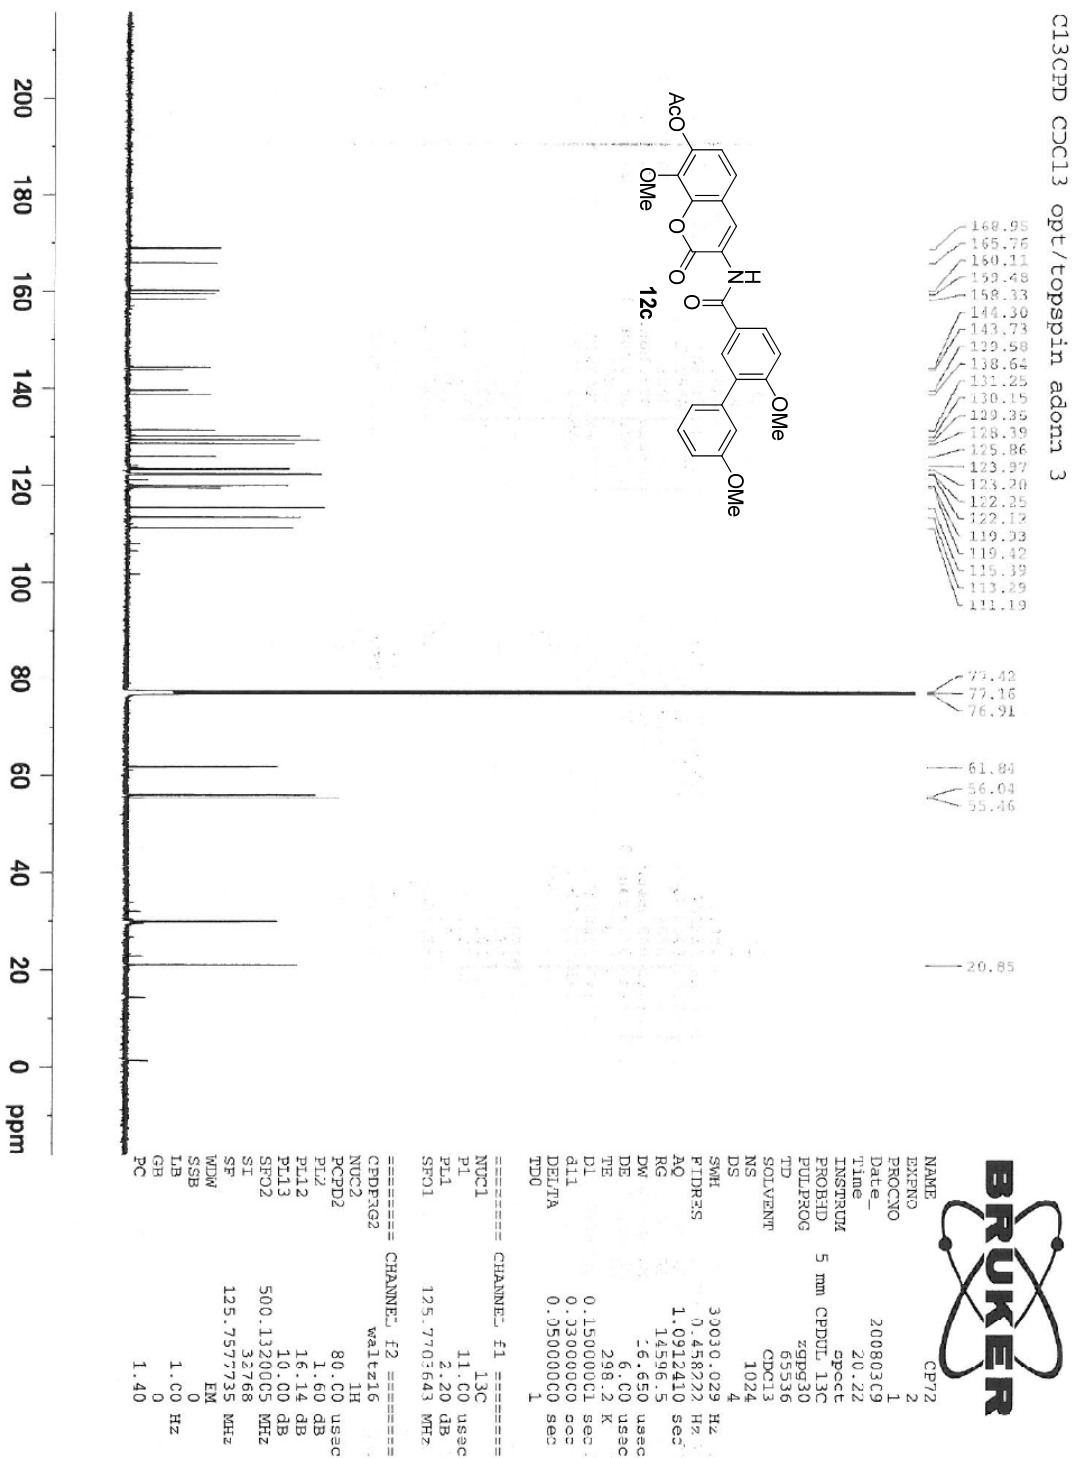



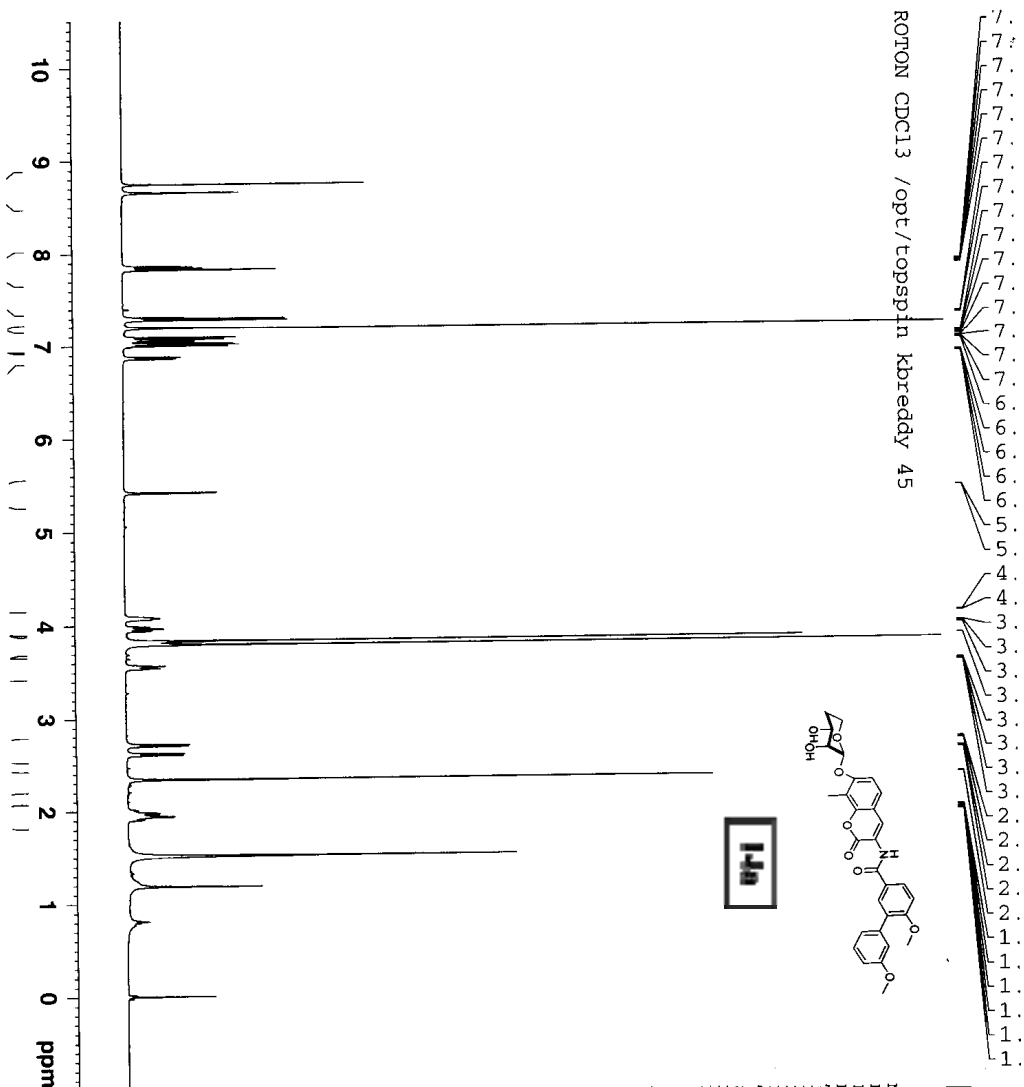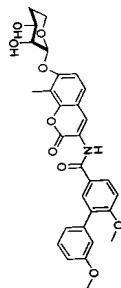

**1-19**

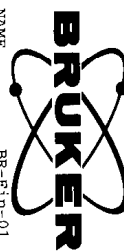

```

NAME BR-Fin-01
EXPNO 1
PROCNO 1
Date_ 20081013
Time 12.53
INSTRUM spect
PROBHD 5 mm CPDUL 13C
PULPROG zg30
TD 65536
SOLVENT CDCl3
NS 16
DS 2
SMH 10330.578 Hz
FIDRES 0.157632 Hz
AQ 3.171923 sec
RG 2050
DE 48.400 usec
TE 298.2 K
D1 1.00000000 sec
TD0 1

===== CHANNEL f1 =====
NUC1 1H
P1 15.00 usec
PL1 6.00 dB
PULW 8.64411545 W
SFO1 500.1930889 MHz
SI 32768
SF 500.1900395 MHz
WDW EM
SSB 0
LB 0.30 Hz
GB 0
PC 1.00
    
```

12A

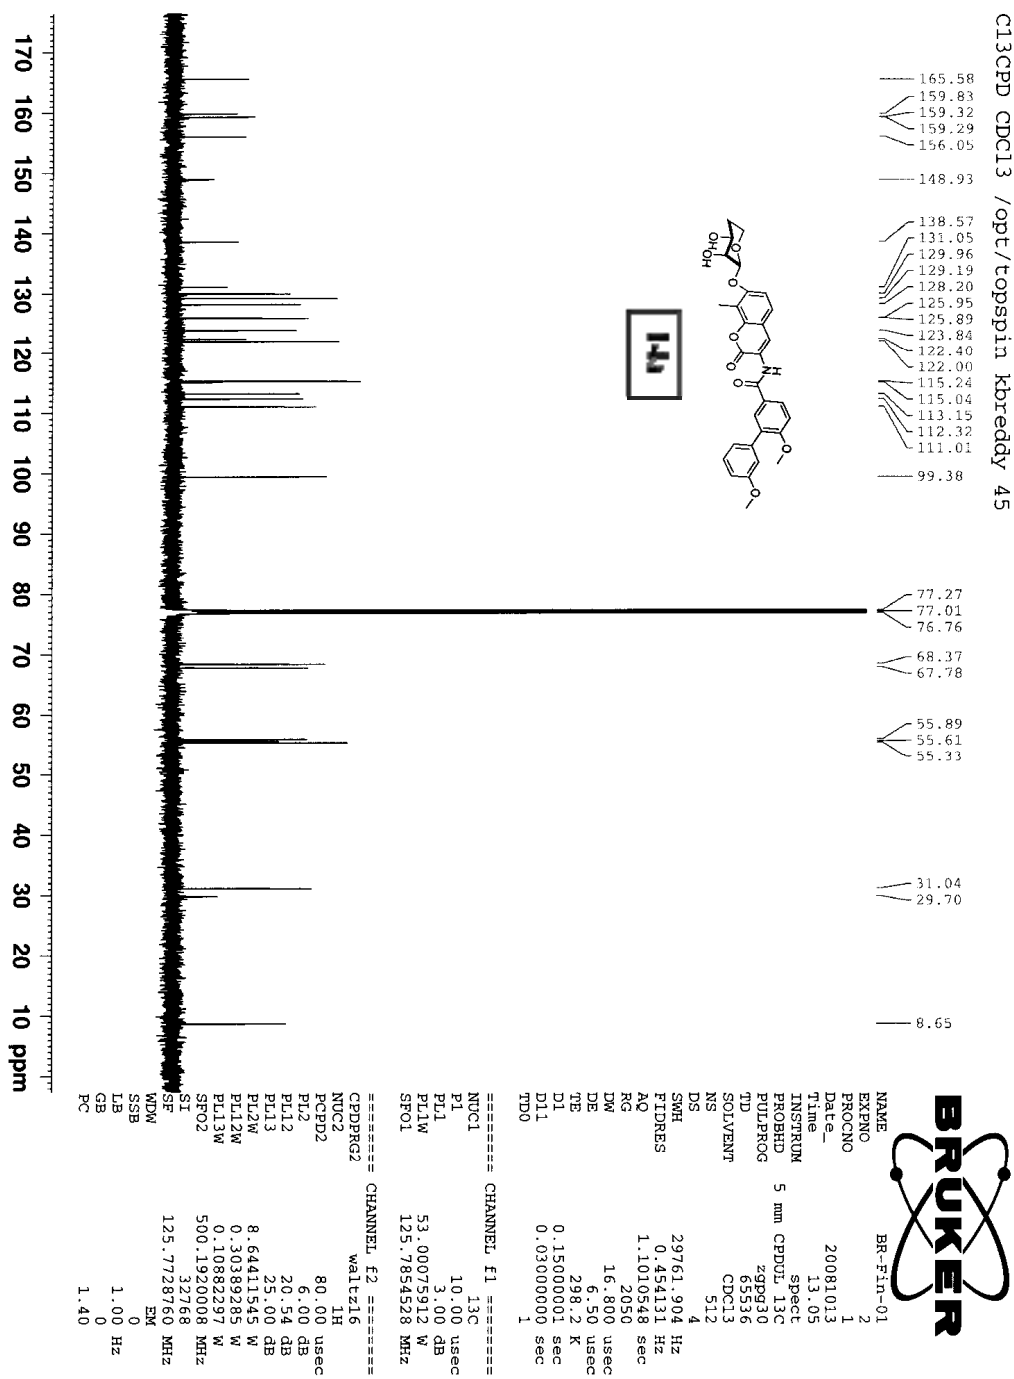

129.

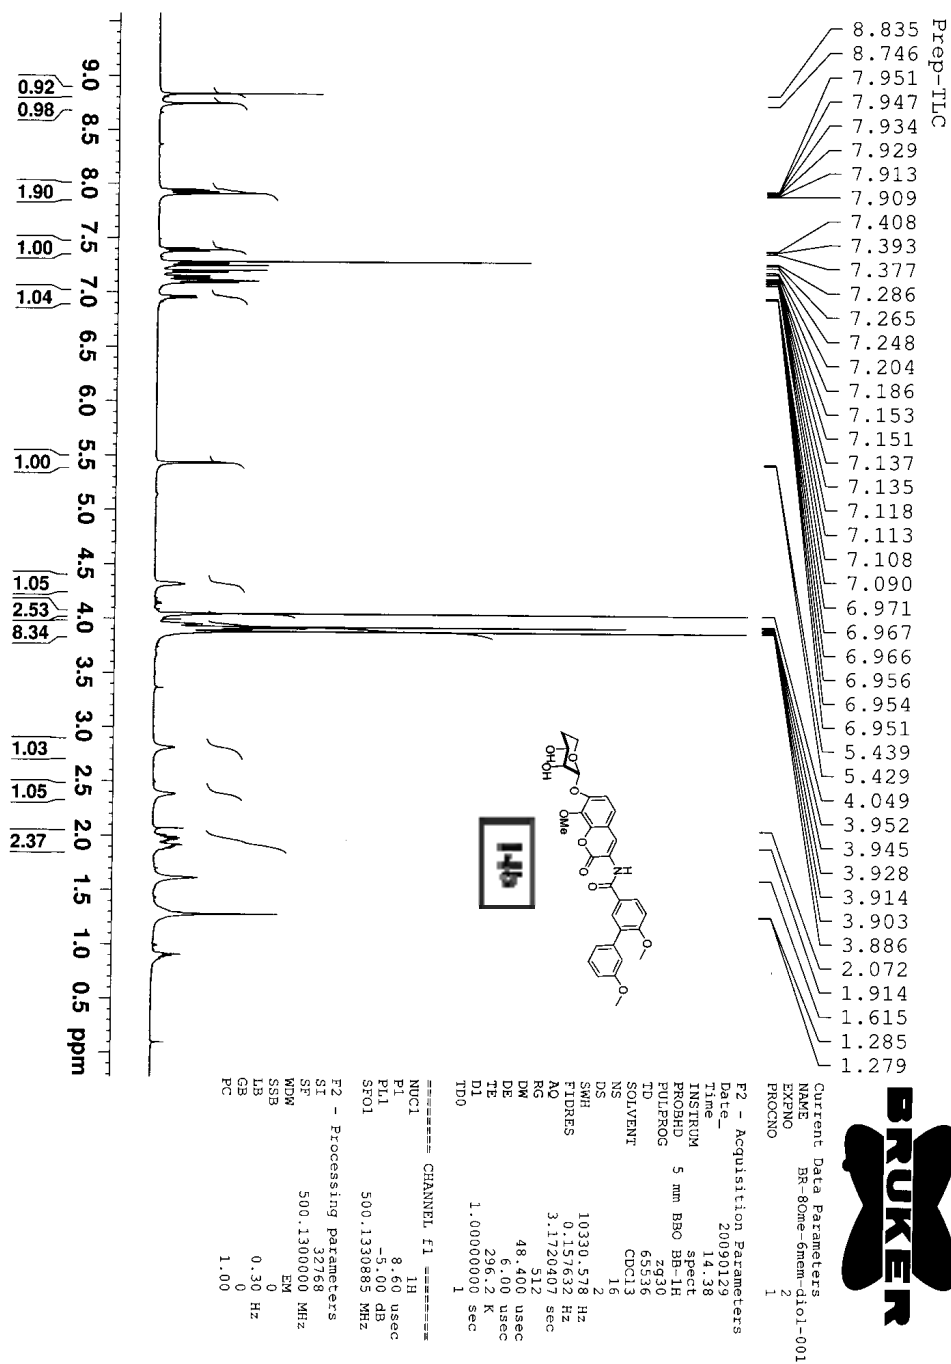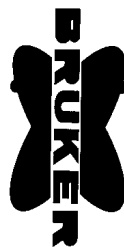

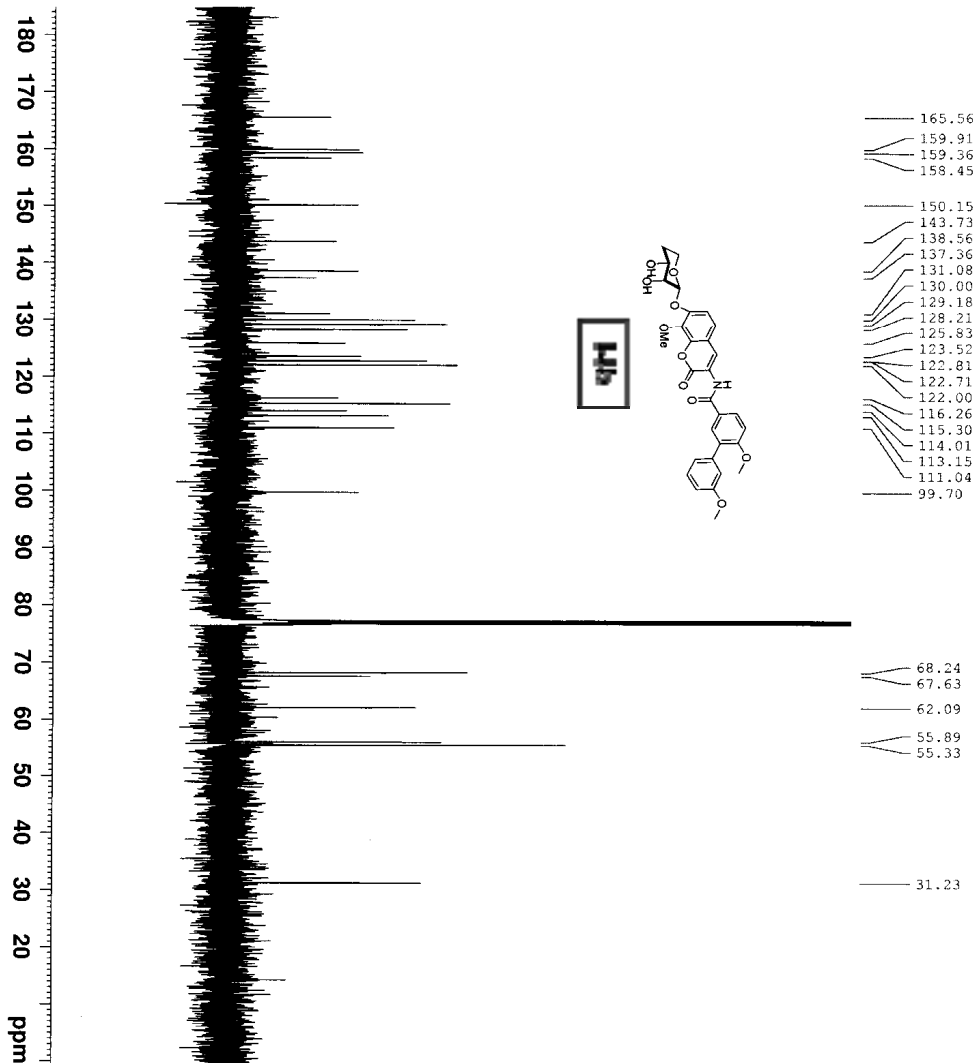

**13c**

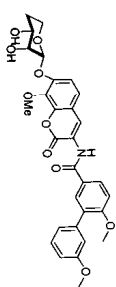

Current Data Parameters  
 NAME BR-8OMe-6mem-02-13C  
 EXPNO 4  
 PROCNO 1

F2 - Acquisition Parameters  
 Date\_ 20090921  
 Time 17.04  
 INSTRUM spect  
 PROBRD 5 mm BBO BB-1H  
 PULPROG zgpg30  
 TD 65536  
 SOLVENT CDCl3  
 NS 316  
 DS 4  
 SWH 30030.029 Hz  
 FIDRES 0.458222 Hz  
 AQ 1.0912410 sec  
 RG 32768  
 DW 16.650 usec  
 DE 6.00 usec  
 TE 298.2 K  
 D1 0.15000001 sec  
 d11 0.03000000 sec  
 DELTA 0.05000000 sec  
 TD0 1

===== CHANNEL f1 =====  
 NUC1 13C  
 P1 8.90 usec  
 PL1 -1.15 dB  
 SFO1 125.7703643 MHz

===== CHANNEL f2 =====  
 CPDPRG2 waltz16  
 NUC2 1H  
 PCPD2 95.00 usec  
 PL2 -2.00 dB  
 PL12 12.88 dB  
 PL13 30.00 dB  
 SFO2 500.1320005 MHz

F2 - Processing parameters  
 SI 32768  
 SF 125.7577890 MHz  
 WBW EM  
 SSB 0  
 LB 1.00 Hz  
 GB 0  
 PC 1.40

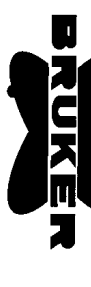

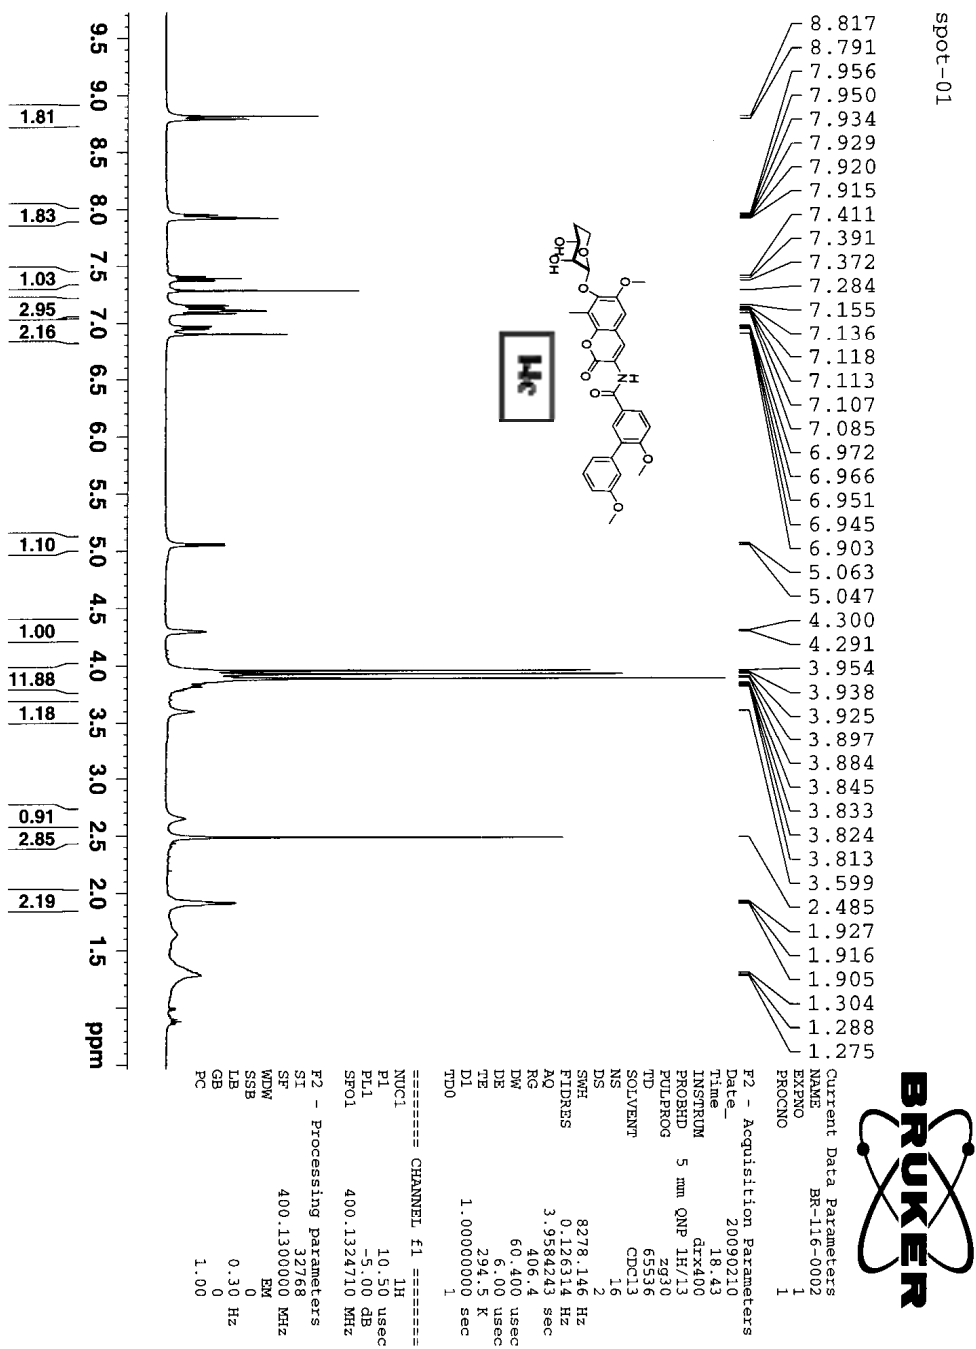

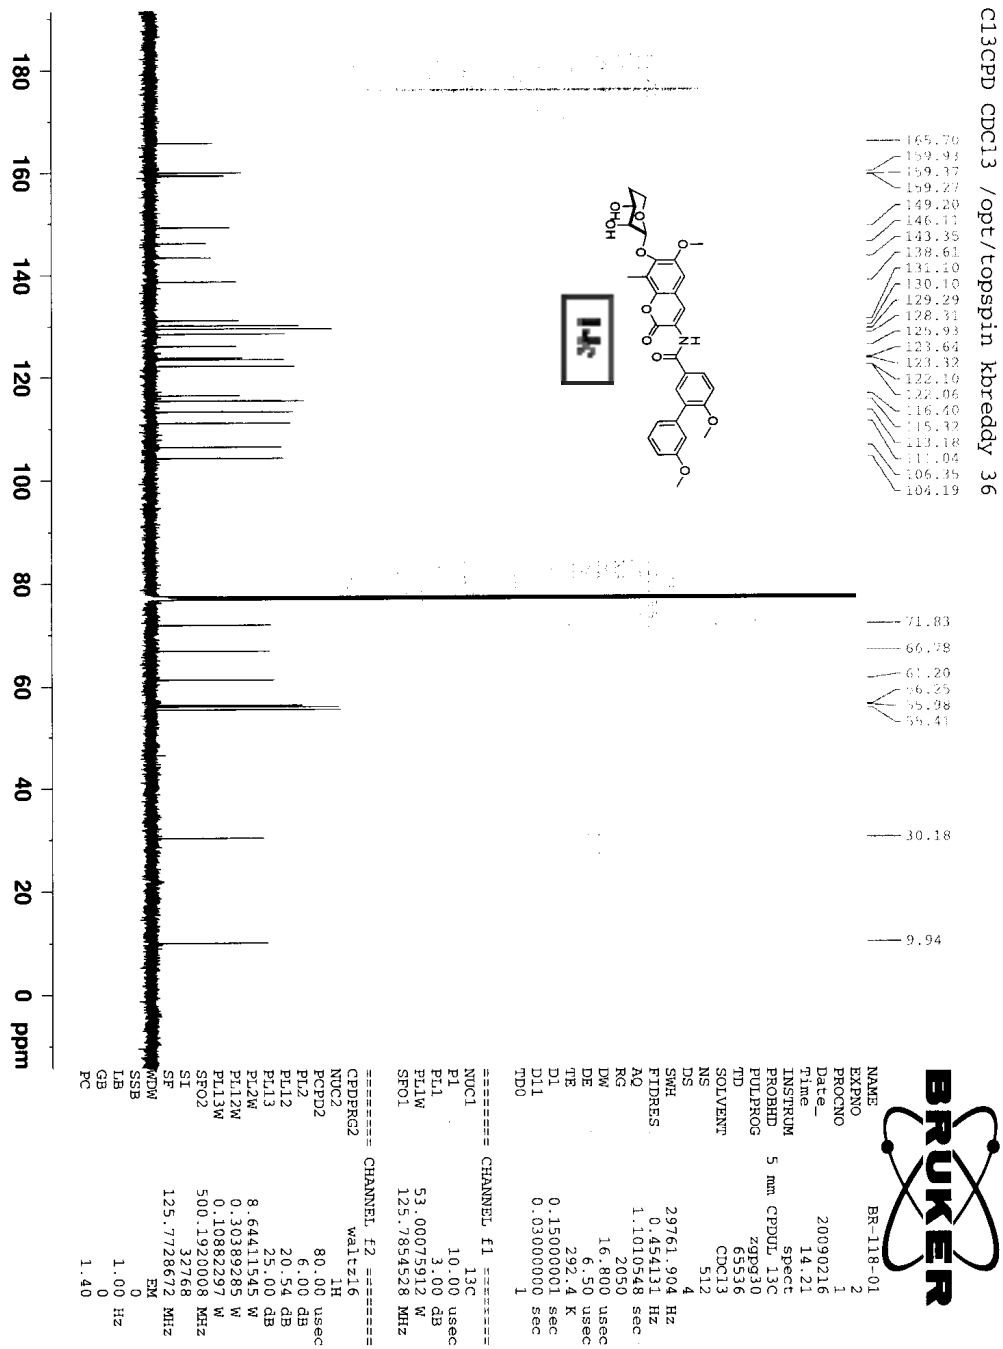



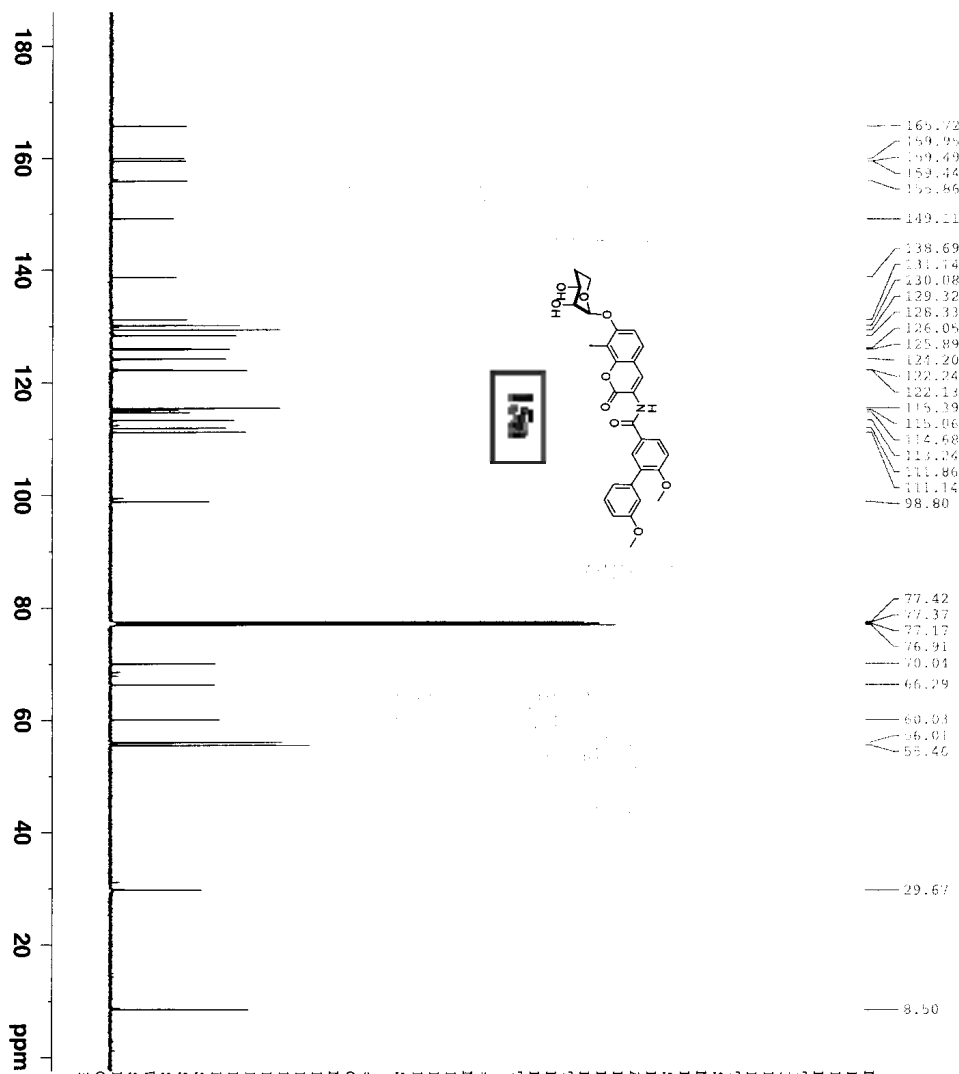

C13CPD CDCl3 /opt/topspin kbreddy 46

- 165.72
- 159.95
- 159.49
- 153.44
- 153.86
- 149.11
- 138.69
- 131.14
- 130.08
- 129.32
- 128.33
- 126.05
- 125.89
- 124.20
- 122.24
- 122.13
- 115.39
- 115.06
- 114.68
- 111.76
- 111.86
- 111.14
- 98.80

- 77.42
- 77.37
- 77.17
- 76.91
- 70.04
- 66.29
- 60.03
- 56.01
- 55.46

- 29.67
- 8.50

**BRUKER**  
 NAME BR-F1n-02  
 EXPNO 2  
 PROCNO 1  
 Date\_ 20081013  
 Time 13:26  
 INSTRUM spect  
 PROBRD 5 mm CPDUT\_13C  
 PULPROG zgpg30  
 np 25536  
 SOLVENT CDCl3  
 NS 768  
 DS 4  
 SWH 29761.904 Hz  
 FIDRES 0.454131 Hz  
 AQ 1.1010548 sec  
 RG 2050  
 DW 16.800 usec  
 DE 6.50 usec  
 TE 298.2 K  
 D1 0.1500001 sec  
 D11 0.0300000 sec  
 TDO 1

==== CHANNEL F1 =====  
 NUC1 13C  
 P1 10.00 usec  
 PL 3.00 dB  
 P1LW 53.00075912 W  
 SFO1 125.7854528 MHz  
 ===== CHANNEL F2 =====  
 CPDPRG2 waitz16  
 NUC2 1H  
 PCPD2 80.00 usec  
 PL2 6.00 dB  
 PL12 20.54 dB  
 PL13 25.00 dB  
 PL1W 8.64411545 W  
 PL1Z 0.30389285 W  
 PL13W 0.10882297 W  
 SFO2 500.1920008 MHz  
 SI 32768  
 SF 125.7728598 MHz  
 WDM EM  
 SSB 0  
 LB 1.00 Hz  
 GB 0  
 PC 1.40

13



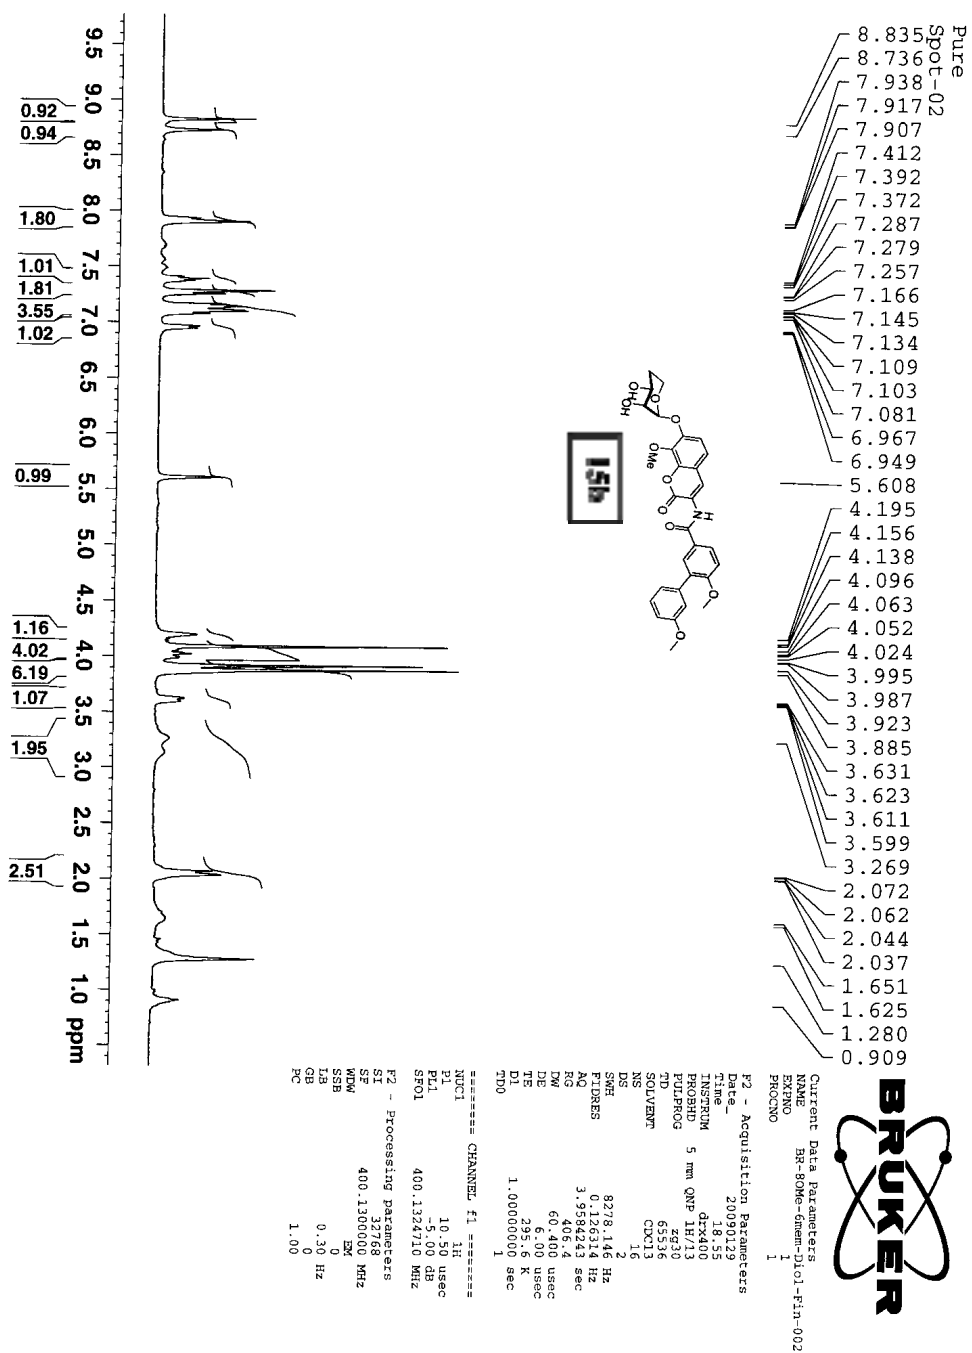

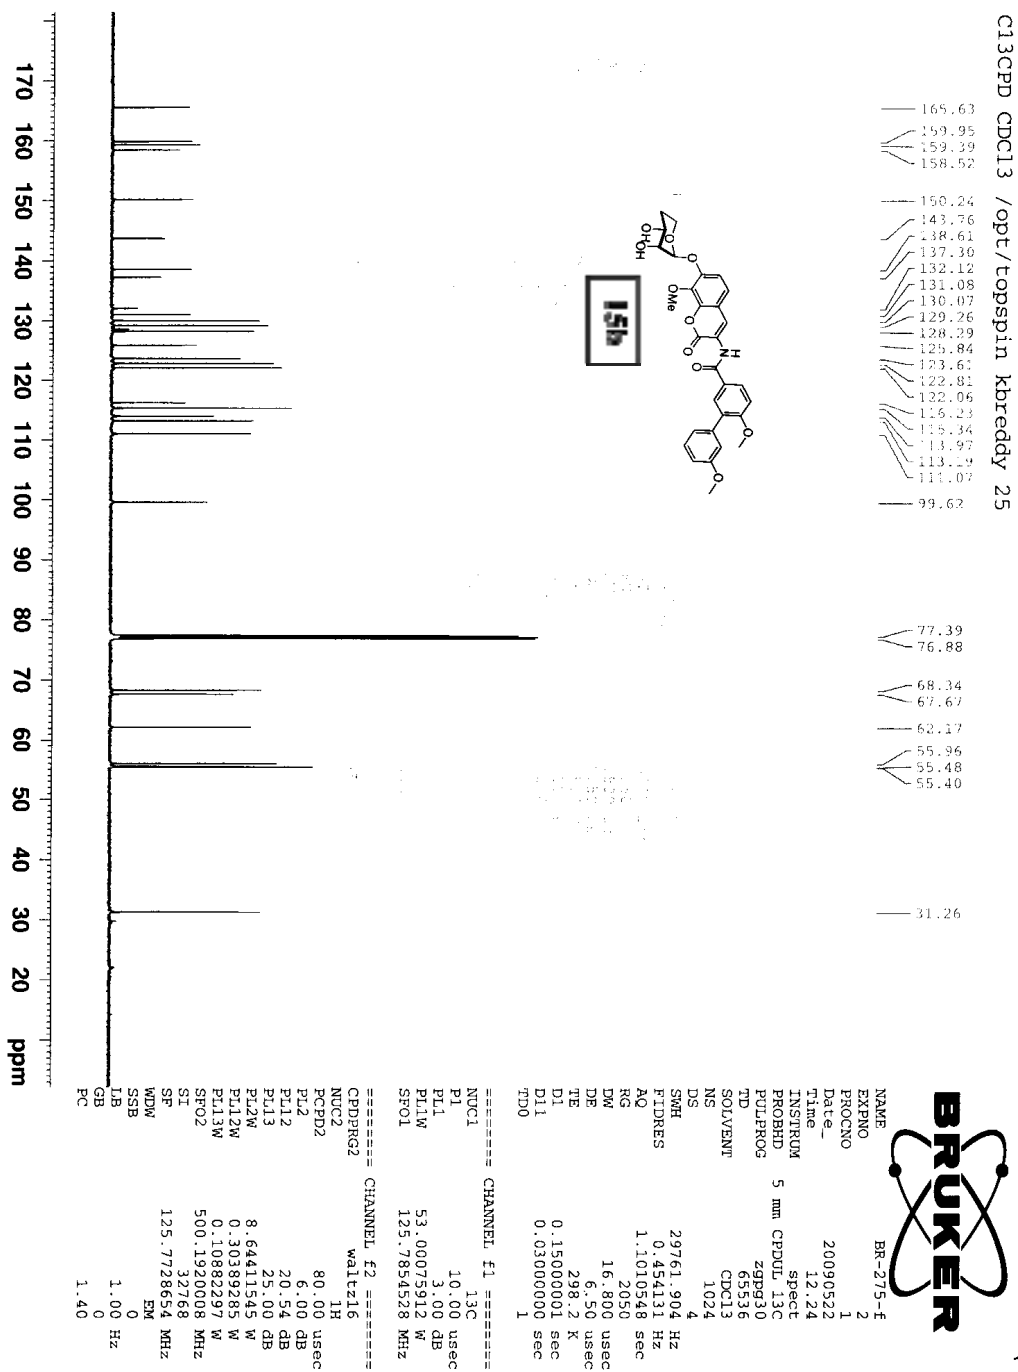

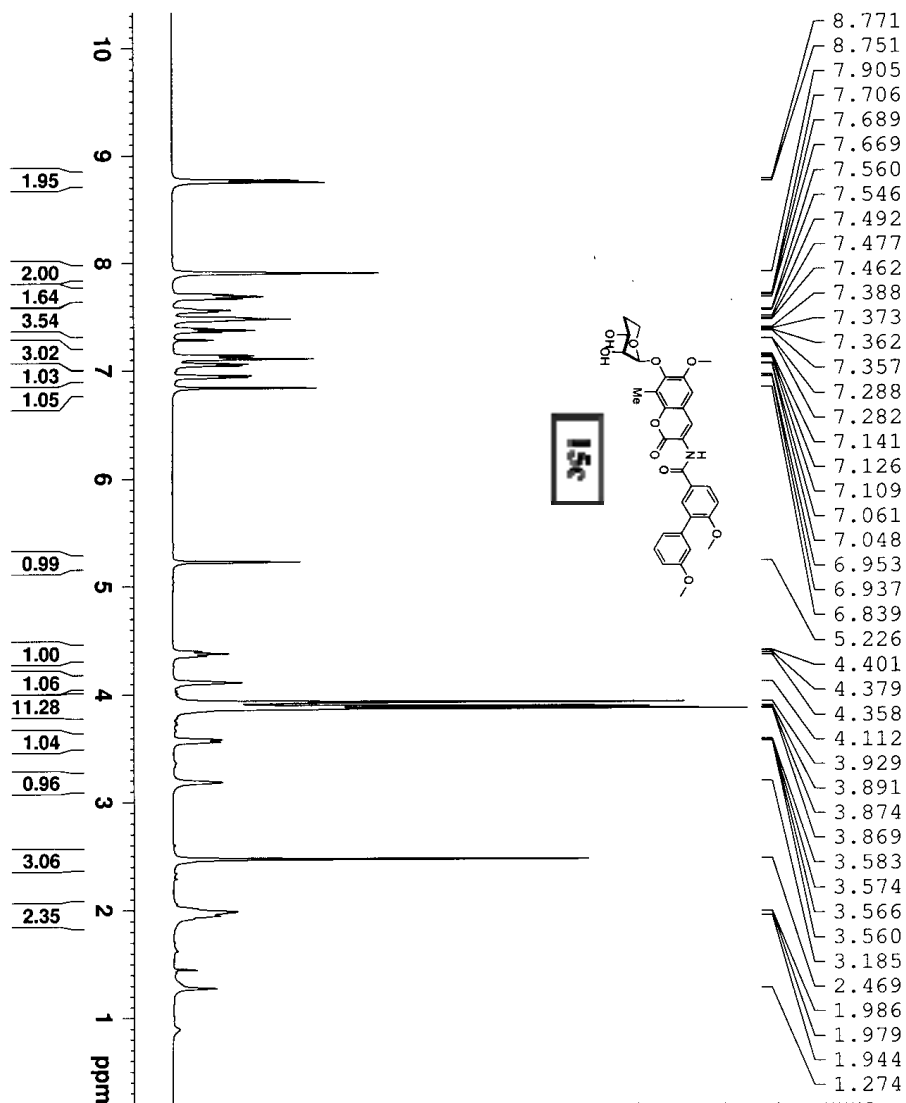

```

Current Data Parameters
NAME BR-60Me-MIs-6memu-d101-03
EXPNO 2
PROCNO 1

F2 - Acquisition Parameters
Date_ 20090528
Time 17.31
INSTRUM spect
PROBHD 5 mm BBO BB-1H
PULPROG zgpg30
TD 65536
SOLVENT CDCl3
NS 16
DS 2
SWH 10330.578 Hz
FIDRES 0.151632 Hz
AQ 0.127000 sec
RG 30.6
DE 48.400 usec
TE 298.2 K
D1 1.00000000 sec
TD0 1

===== CHANNEL f1 =====
NUC1 1H
P1 8.60 usec
PL1 3.00 dB
SFO1 500.130000 MHz

F2 - Processing parameters
SI 32768
SF 500.130000 MHz
WDW EM
SSB 0
LB 0.30 Hz
GB 0
PC 1.00
    
```

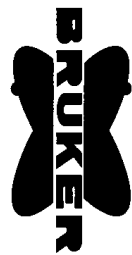

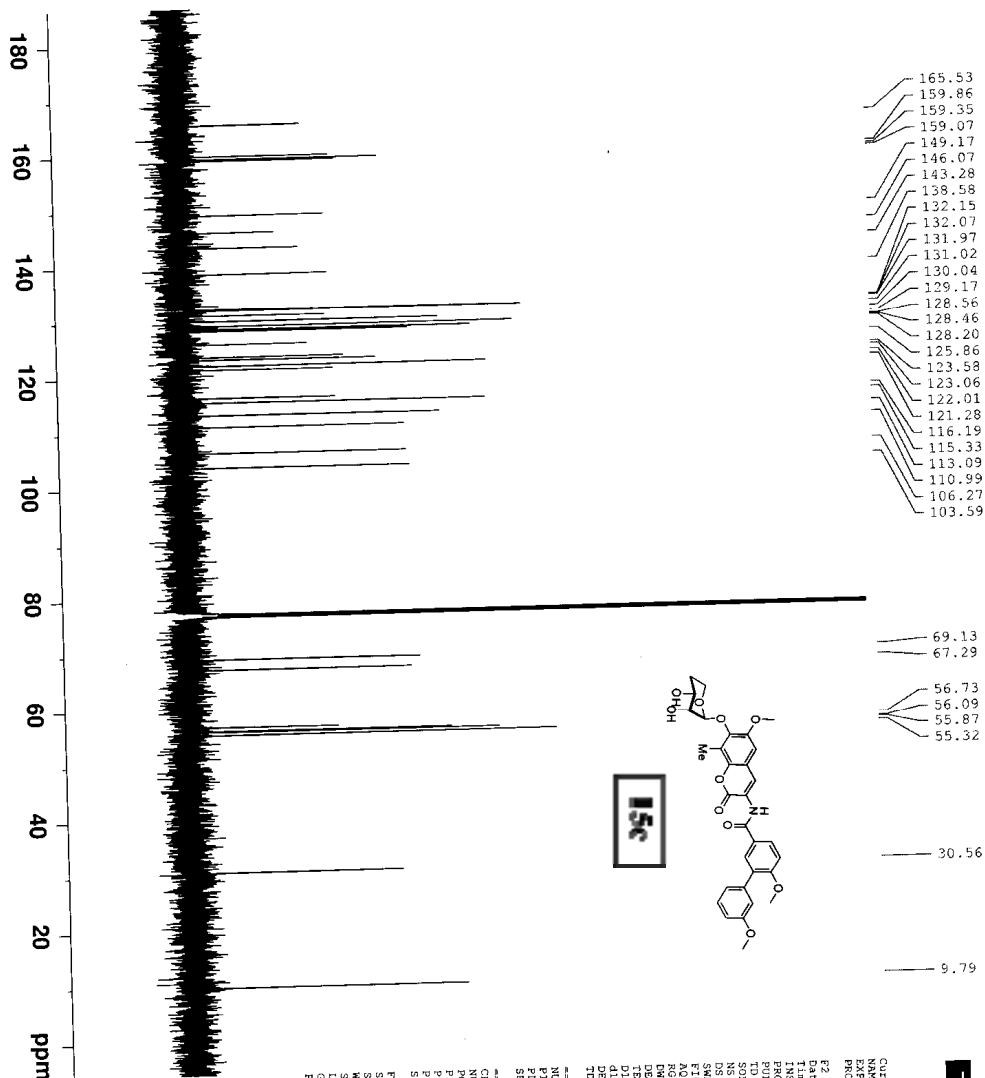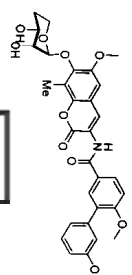

- 165.53
- 159.86
- 159.35
- 159.07
- 149.17
- 146.07
- 143.28
- 138.58
- 132.15
- 132.07
- 131.97
- 131.02
- 130.04
- 129.17
- 128.56
- 128.46
- 128.20
- 125.86
- 123.58
- 123.06
- 122.01
- 121.28
- 116.19
- 115.33
- 113.09
- 110.99
- 106.27
- 103.59

- 69.13
- 67.29
- 56.73
- 56.09
- 55.87
- 55.32
- 30.56
- 9.79

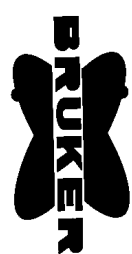

Current Data Parameters  
 NAME BR-60M-Mits-Gemmu-d10-03-13c  
 EXPNO 1  
 PROCNO 1  
 F2 - Acquisition Parameters  
 Date\_ 200117134  
 Time 17:34  
 INSTRUM spect  
 PROBRD 5 mm BBO BB-1H  
 PULPROG zgpg30  
 TD 65536  
 FIDRES 0.1500001  
 SOLVENT CDCl3  
 NS 289  
 DS 4  
 SFR 30030.029 Hz  
 FIDRES 0.458222 Hz  
 AQ 0.458222 sec  
 RG 1.0912768  
 DM 16.650 usec  
 DE 8.00 usec  
 TE 300.2 K  
 T1 0.1500001 sec  
 d11 0.0300000 sec  
 DELTA 0.0300000 sec  
 TDO 1  
 ===== CHANNEL f1 =====  
 NUC1 13C  
 P1 8.90 usec  
 PL1 -1.15 dB  
 SFO1 125.7703643 MHz  
 ===== CHANNEL f2 =====  
 CPDPRG2 waltz16  
 NUC2 1H  
 P2 95.10 usec  
 PL2 -5.00 dB  
 PL12 15.86 dB  
 PL13 15.86 dB  
 SFO2 500.1320005 MHz  
 F2 - Processing parameters  
 SI 125.7577891 MHz  
 SF 500.1320005 MHz  
 WDW EM  
 SSB 0  
 GB 1.0 Hz  
 PC 1.40

PROTON CDCl3 /opt/topspin khreddy 9

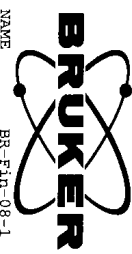

18a

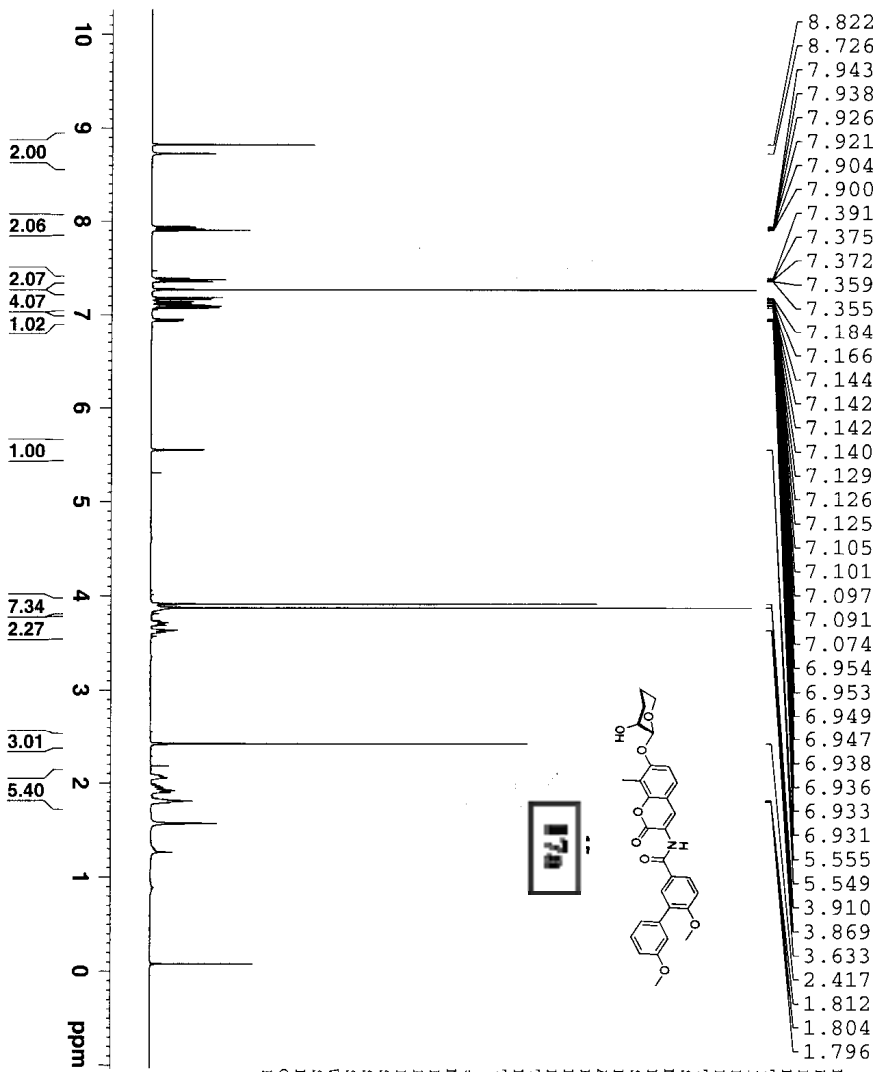

- 8.822
- 8.726
- 7.943
- 7.938
- 7.926
- 7.921
- 7.904
- 7.900
- 7.391
- 7.375
- 7.372
- 7.359
- 7.355
- 7.184
- 7.166
- 7.144
- 7.142
- 7.142
- 7.140
- 7.129
- 7.126
- 7.125
- 7.105
- 7.101
- 7.097
- 7.091
- 7.074
- 6.954
- 6.953
- 6.949
- 6.947
- 6.938
- 6.936
- 6.933
- 6.931
- 5.555
- 5.549
- 3.910
- 3.869
- 3.633
- 2.417
- 1.812
- 1.804
- 1.796

```

NAME BR-F1h-08-1
EXPNO 1
PROCNO 1
Date_ 20081014
Time 13.37
INSTRUM spect
PROBHD 5 mm CPDUL 13C
PULPROG zg30
TD 65536
SOLVENT CDCl3
NS 16
DS 2
SWH 10330.578 Hz
FIDRES 0.157632 Hz
AQ 3.1719923 sec
RG 2050
DM 48.400 usec
DE 6.50 usec
TE 298.2 K
D1 1.00000000 sec
TDO 1

===== CHANNEL f1 =====
NUC1 1H
P1 15.00 usec
PL1 6.00 dB
PL1W 8.64411545 W
SFO1 500.130889 MHz
SI 32768
SF 500.1900012 MHz
WDW EM
SSB 0
LB 0.30 Hz
GB 0
PC 1.00
    
```

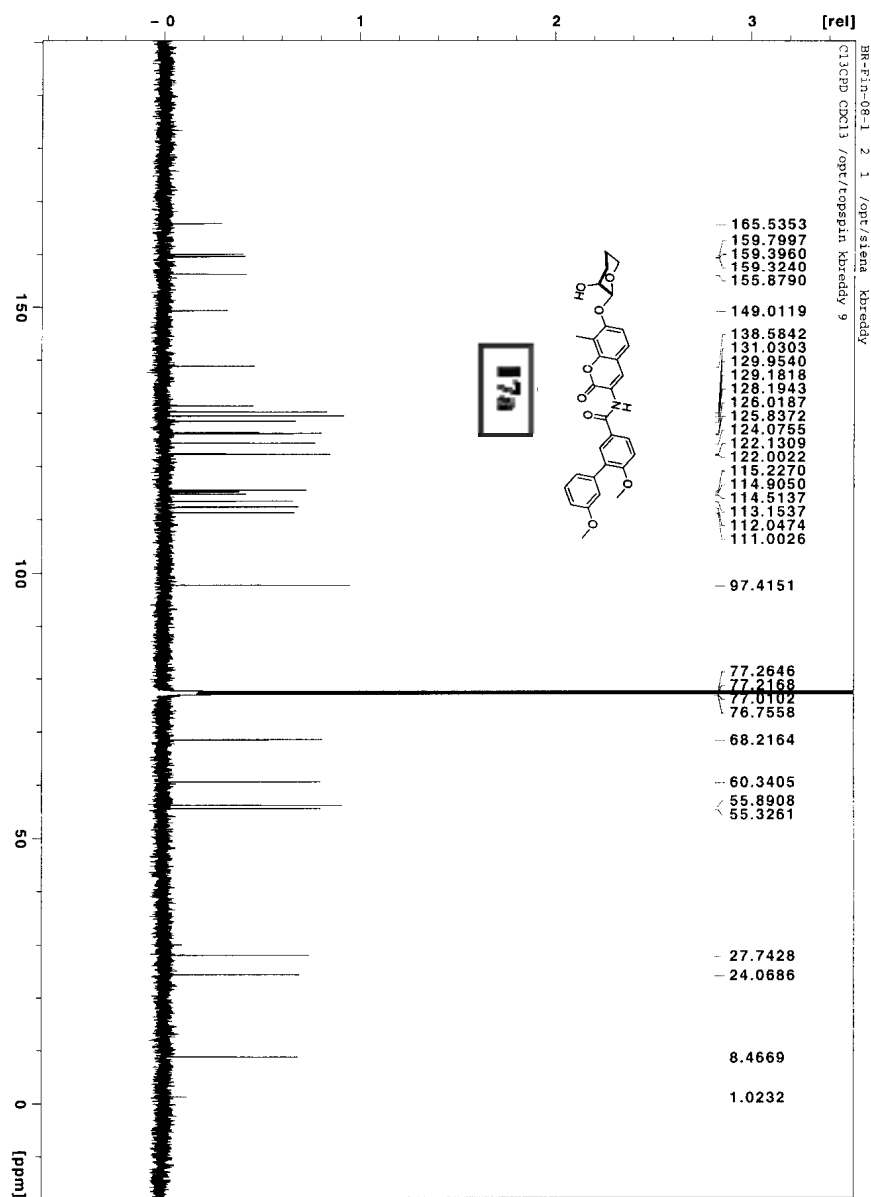

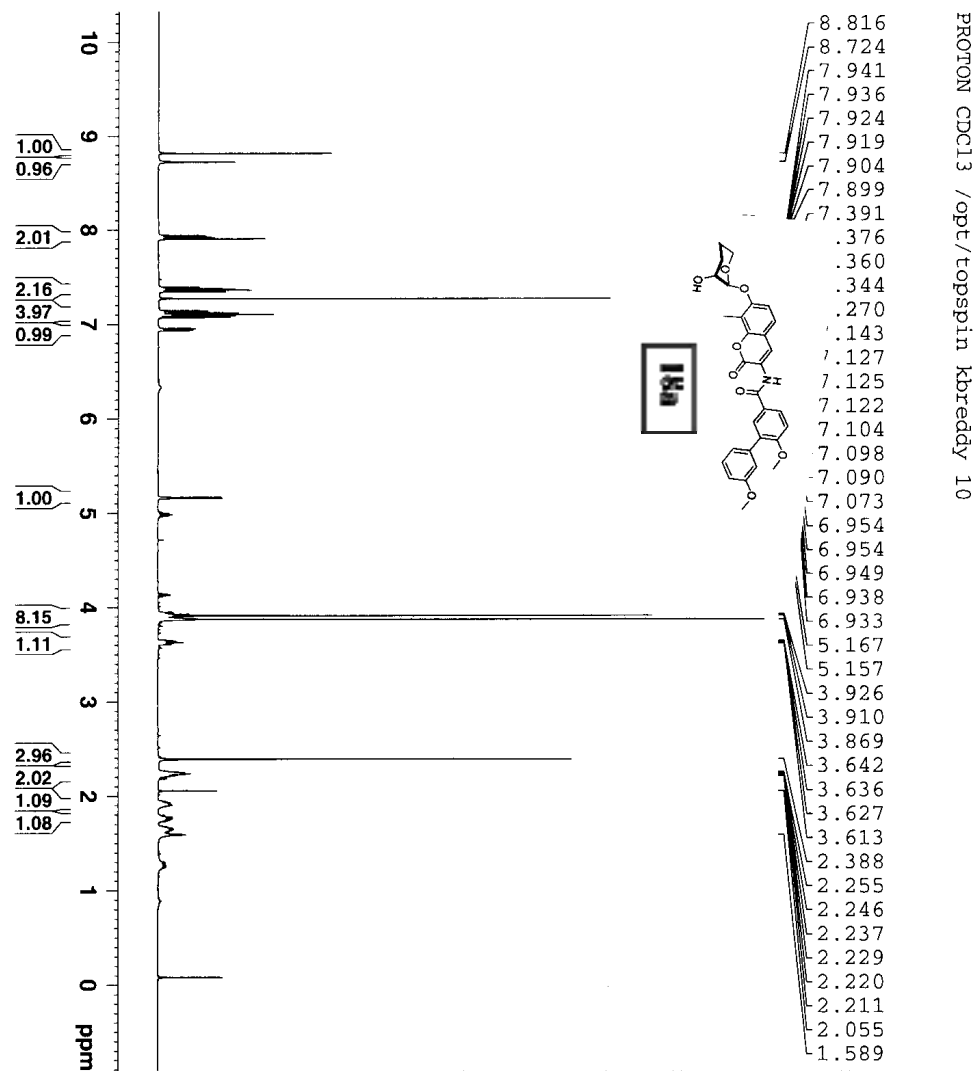

BRUKER

BR-F1h-08-2

NAME  
EXPNO 1  
PROCNO 1  
Date\_ 20081014  
Time 14.25  
INSTRUM spect  
PROBHD 5 mm CPDUL 13C  
PULPROG zg30  
TD 65536  
SOLVENT CDCl<sub>3</sub>  
NS 16  
DS 2  
SWH 10330.578 Hz  
FIDRES 0.157632 Hz  
AQ 3.171923 sec  
RG 2050  
DM 48.400 usec  
DE 6.50 usec  
TE 298.2 K  
D1 1.00000000 sec  
TD0 1

==== CHANNEL f1 =====  
NUC1 1H  
P1 15.00 usec  
PL1 6.00 dB  
PL1W 8.64411845 W  
SFO1 500.1930889 MHz  
SI 32768  
SF 500.1900002 MHz  
WDW EM  
SSB 0  
LB 0.30 Hz  
GB 0  
PC 1.00

18a

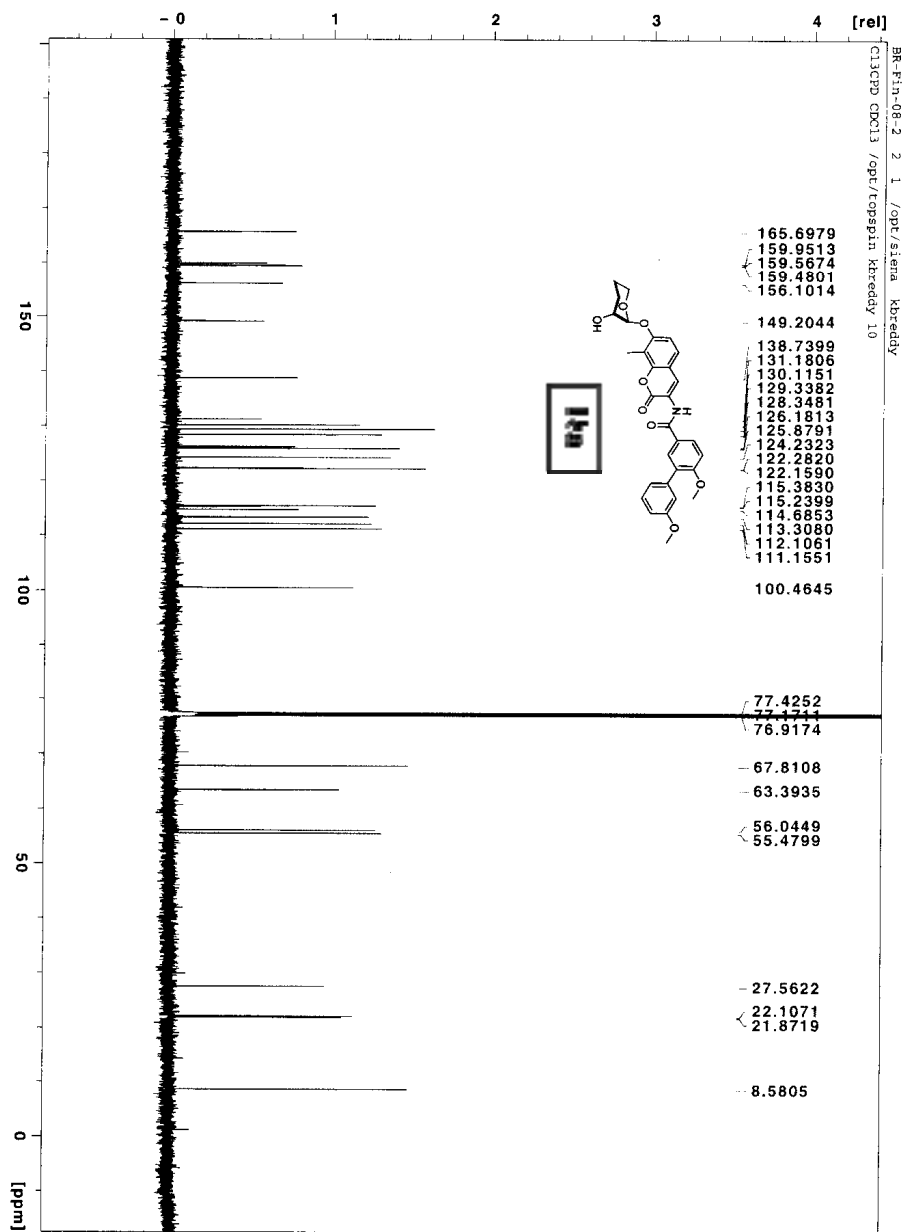



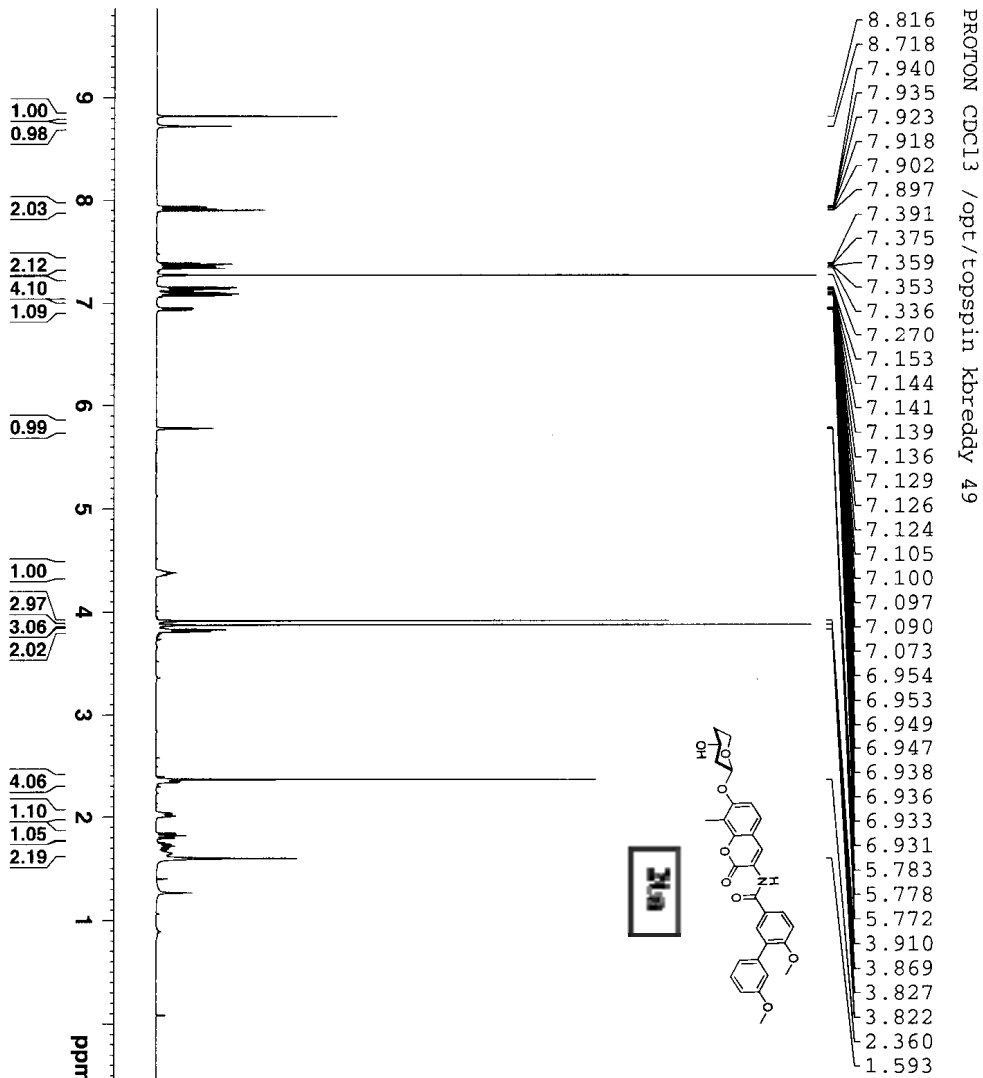

PROTON CDCl3 /opt/topspin kbreddy 49

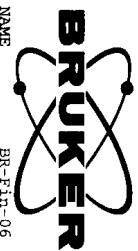

15a

NAME BR-Fin-06  
 EXPNO 1  
 PROCNO 1  
 Date\_ 20081013  
 Time 14.06  
 INSTRUM spect  
 PROBHD 5 mm CPDUL 13C  
 PULPROG zg30  
 TD 65536  
 SOLVENT CDCl3  
 NS 16  
 DS 2  
 SWH 10330.578 Hz  
 FIDRES 0.157632 Hz  
 AQ 3.1719923 sec  
 RG 2050  
 DW 48.400 usec  
 DE 6.50 usec  
 TE 298.2 K  
 D1 1.00000000 sec  
 TDO 1

===== CHANNEL f1 =====  
 NUC1 1H  
 P1 15.00 usec  
 PL 6.00 dB  
 PL1W 8.6441545 W  
 SFO1 500.13910889 MHz  
 SI 32768  
 SF 500.1399999 MHz  
 WDM EM  
 SSB 0  
 LB 0.30 Hz  
 GB 0  
 PC 1.00

- 8.816
- 8.718
- 7.940
- 7.935
- 7.923
- 7.918
- 7.902
- 7.897
- 7.391
- 7.375
- 7.359
- 7.353
- 7.336
- 7.270
- 7.153
- 7.144
- 7.141
- 7.139
- 7.136
- 7.129
- 7.126
- 7.124
- 7.105
- 7.100
- 7.097
- 7.090
- 7.073
- 6.954
- 6.953
- 6.949
- 6.947
- 6.938
- 6.936
- 6.933
- 6.931
- 5.783
- 5.778
- 5.772
- 3.910
- 3.869
- 3.827
- 3.822
- 2.360
- 1.593

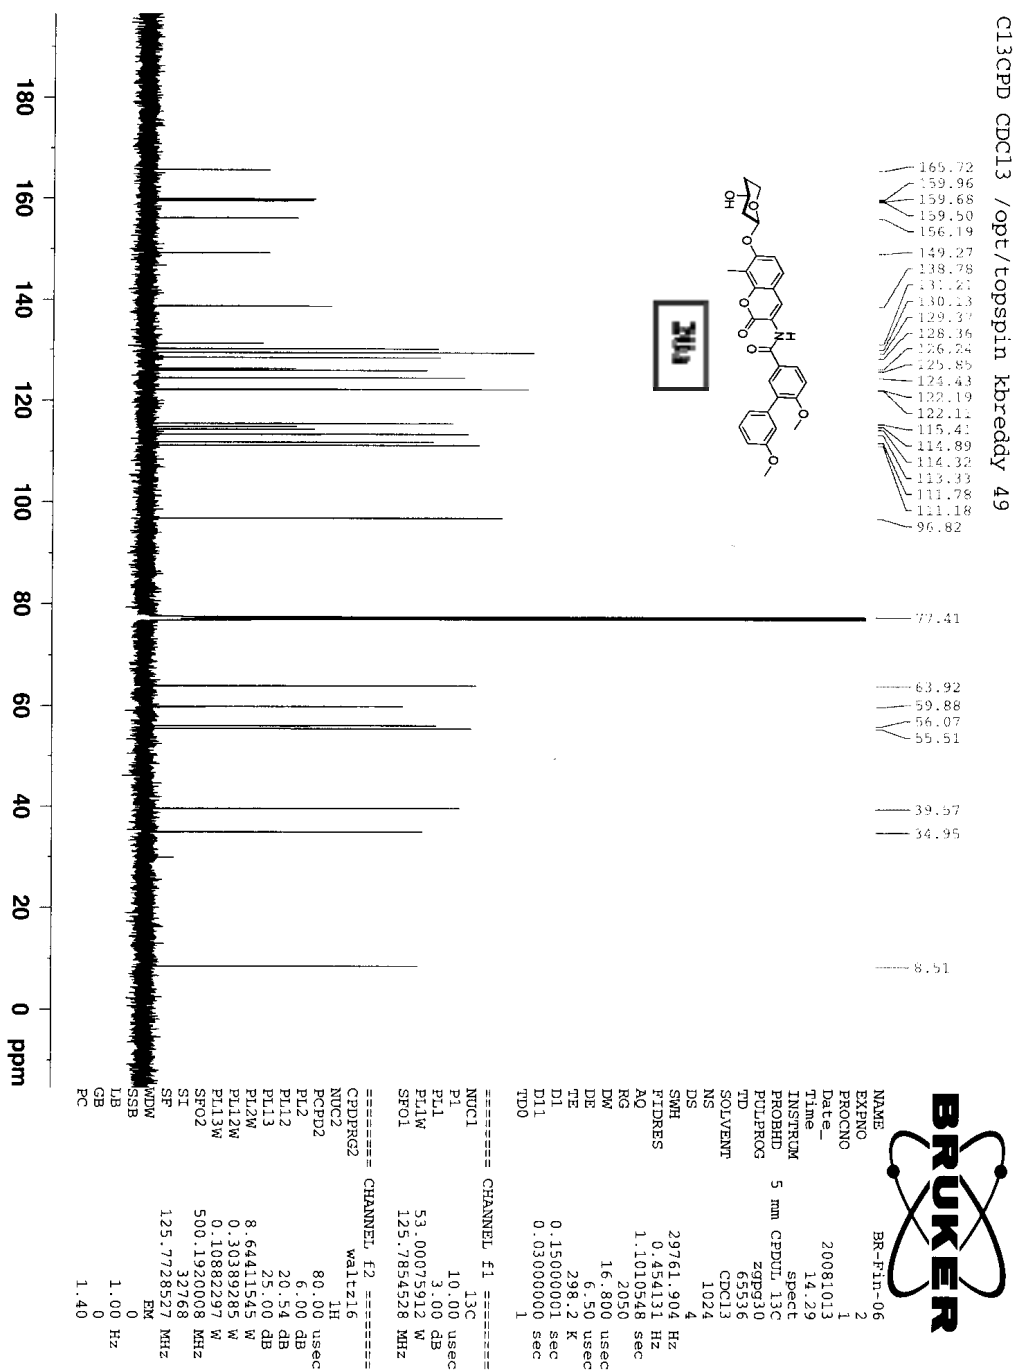

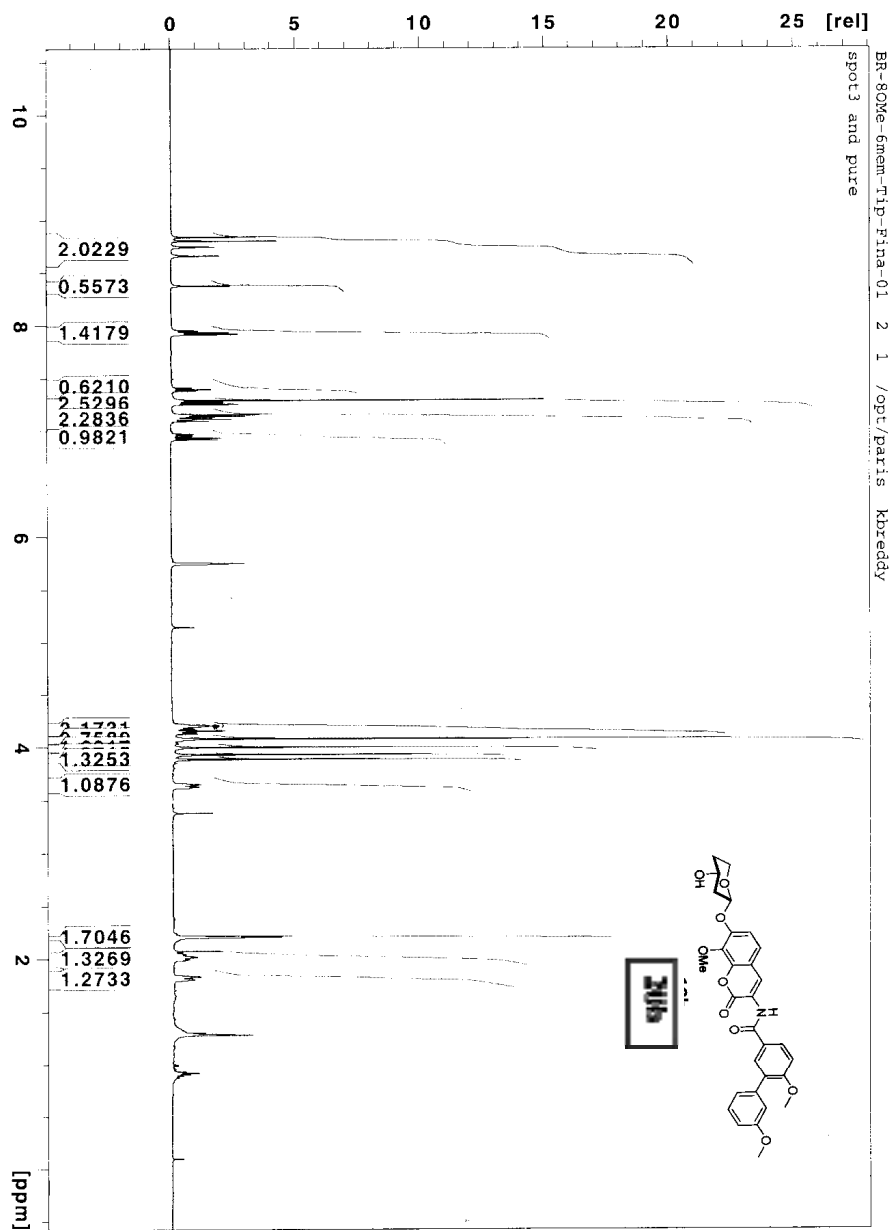

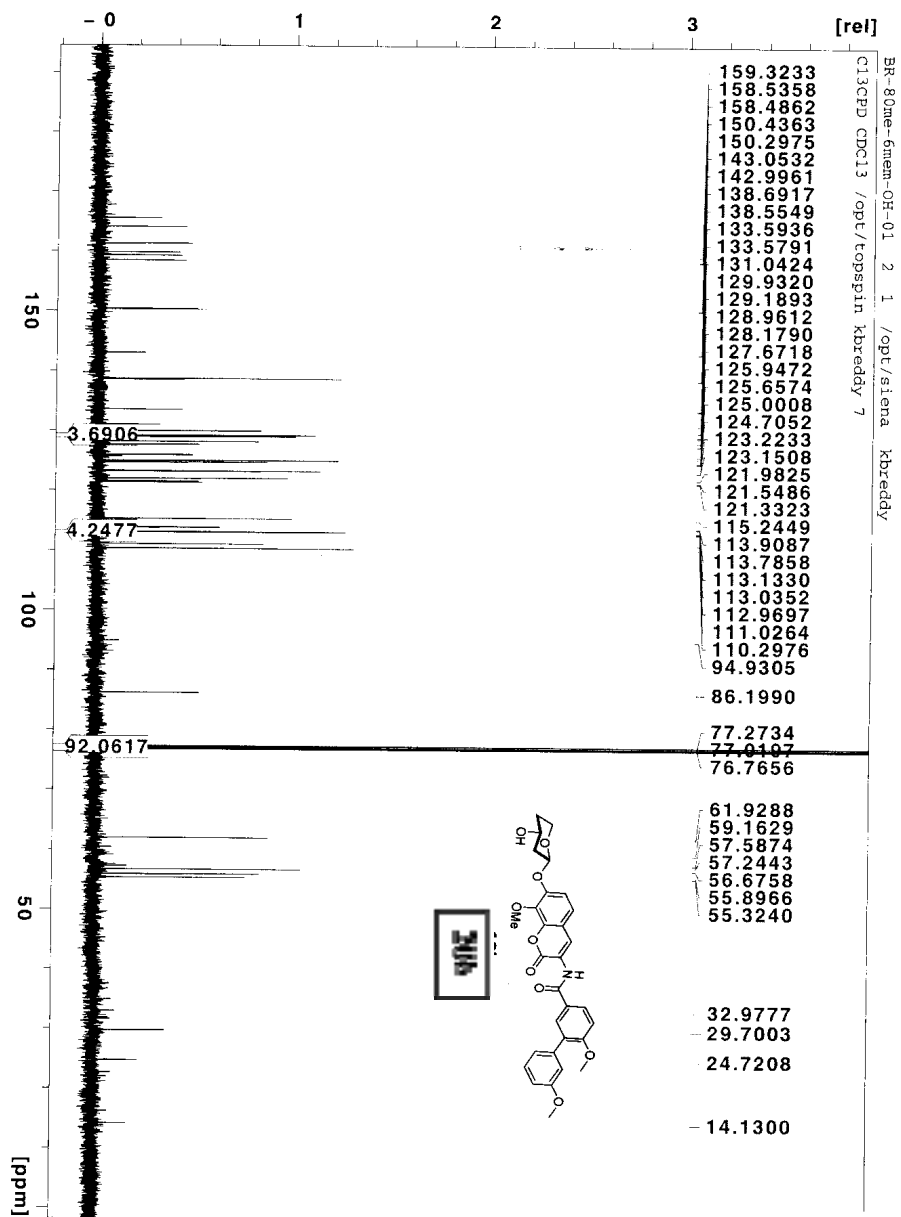

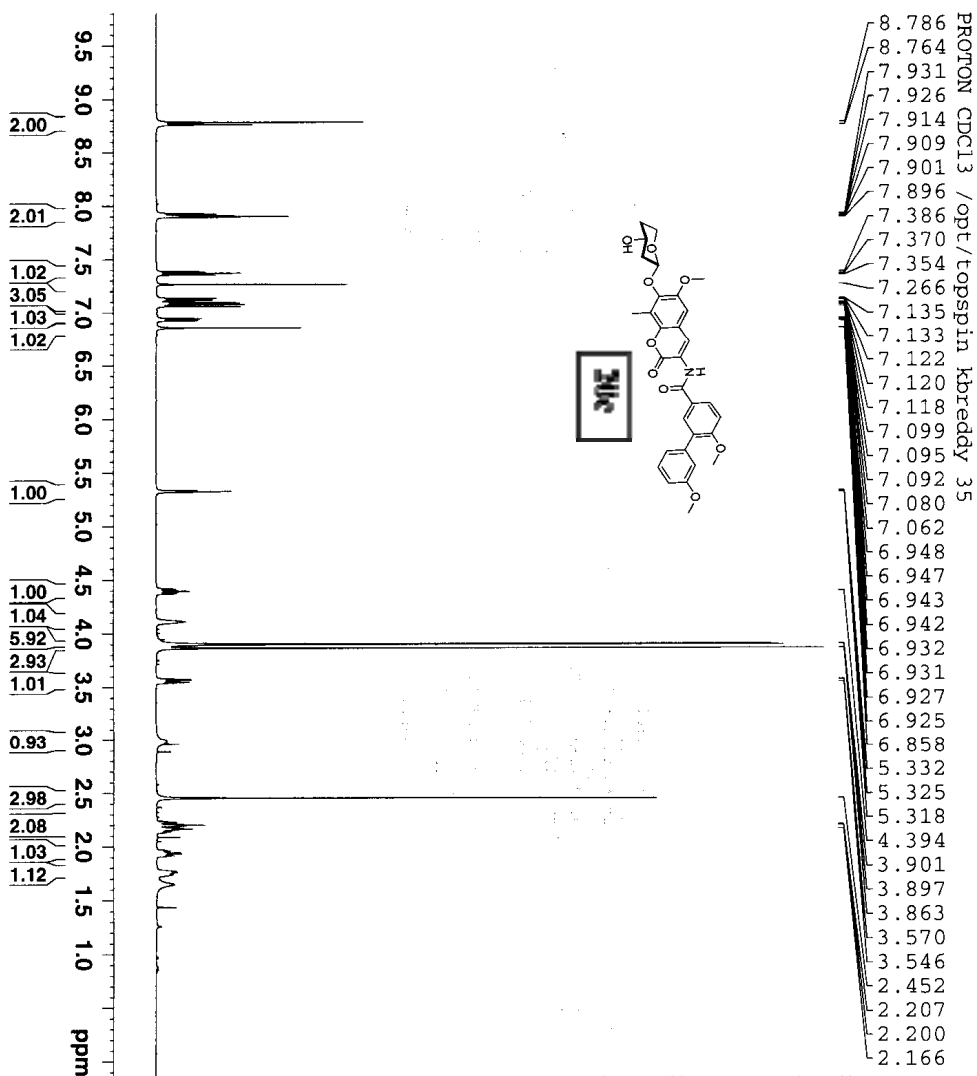

PROTON CDCl3 /opt/topspin kbreddy 35

|       |
|-------|
| 8.786 |
| 8.764 |
| 7.931 |
| 7.926 |
| 7.914 |
| 7.909 |
| 7.901 |
| 7.896 |
| 7.386 |
| 7.370 |
| 7.354 |
| 7.266 |
| 7.135 |
| 7.133 |
| 7.122 |
| 7.120 |
| 7.118 |
| 7.099 |
| 7.095 |
| 7.092 |
| 7.080 |
| 7.062 |
| 6.948 |
| 6.947 |
| 6.943 |
| 6.942 |
| 6.932 |
| 6.931 |
| 6.927 |
| 6.925 |
| 6.858 |
| 5.332 |
| 5.325 |
| 5.318 |
| 4.394 |
| 3.901 |
| 3.897 |
| 3.863 |
| 3.570 |
| 3.546 |
| 2.452 |
| 2.207 |
| 2.200 |
| 2.166 |

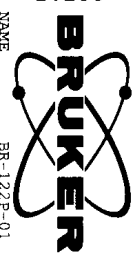

```

NAME BR-122P-01
EXPNO 1
PROCNO 1
Date_ 20090608
Time 11.30
INSTRUM spect
PROBHD 5 mm CPDUL 13C
PULPROG zg30
TD 65536
SOLVENT CDCl3
NS 16
DS 2
SWH 10330.578 Hz
FIDRES 0.157632 Hz
AQ 3.1719923 sec
RG 1820
DE 48.400 usec
DM 6.50 usec
TE 298.2 K
D1 1.00000000 sec
TD0 1

===== CHANNEL f1 =====
NUC1 1H
P1 15.00 usec
PL1 6.00 dB
PL1W 8.6441545 W
SFO1 500.1930889 MHz
SI 32768
SF 500.1900019 MHz
WDW EM
SSE 0
GB 0
PC 1.00
    
```



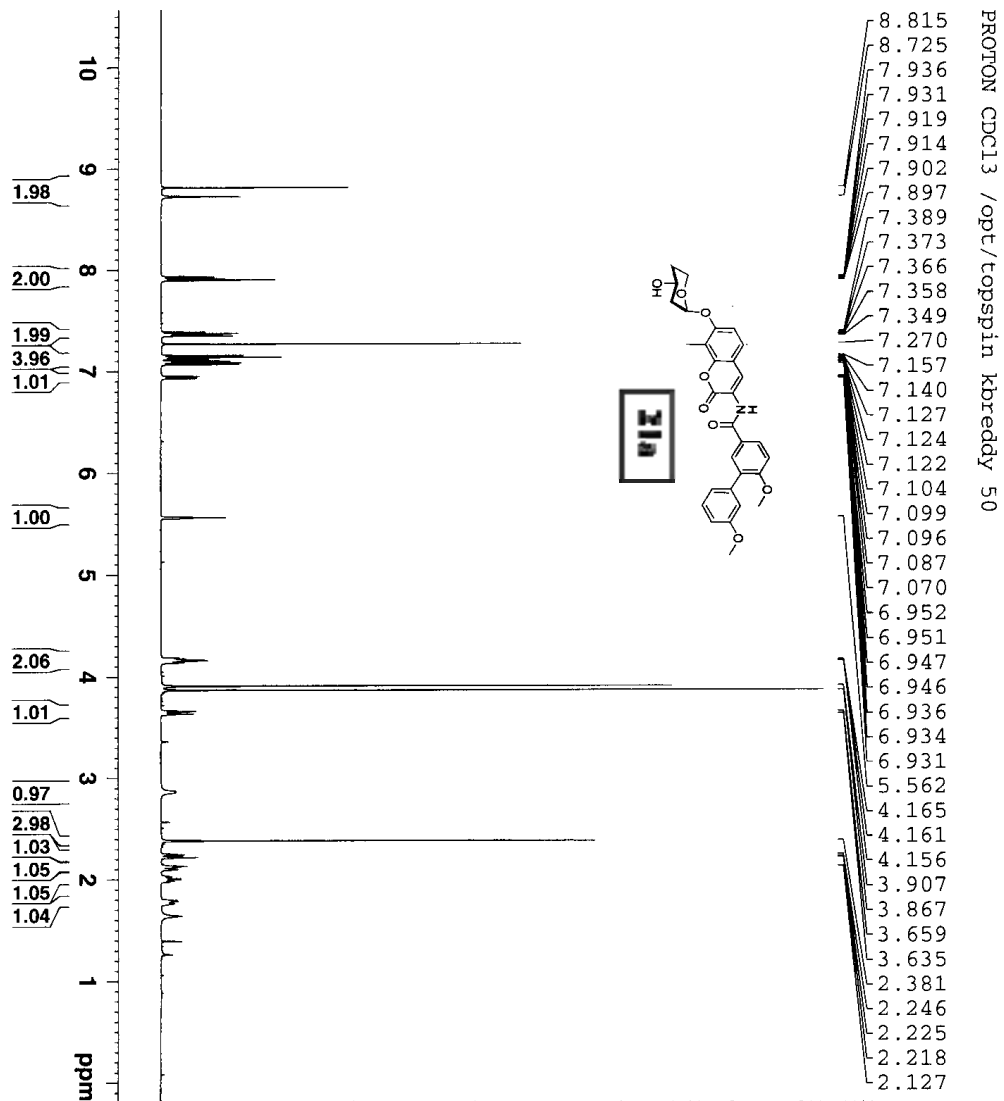

BRUKER

NAME BR-F1h-07  
 EXPNO 1  
 PROCNO 1  
 Date\_ 20081013  
 Time 14.33  
 INSTRUM spect  
 PROBHD 5 mm CPDUL 13C  
 PULPROG zg30  
 TD 65536  
 SOLVENT CDCl3  
 NS 16  
 DS 2  
 SWH 10330.578 Hz  
 FIDRES 0.157632 Hz  
 AQ 3.171923 sec  
 RG 2050  
 DW 48.400 usec  
 DE 6.50 usec  
 TE 298.2 K  
 D1 1.0000000 sec  
 TDO 1

----- CHANNEL f1 -----  
 NUC1 1H  
 P1 15.00 usec  
 PL1 6.00 dB  
 PL1W 8.64411545 W  
 SFO1 500.1930889 MHz  
 SI 32768  
 SF 500.1900001 MHz  
 WDW EM  
 SSB 0  
 LB 0.30 Hz  
 GB 0  
 PC 1.00

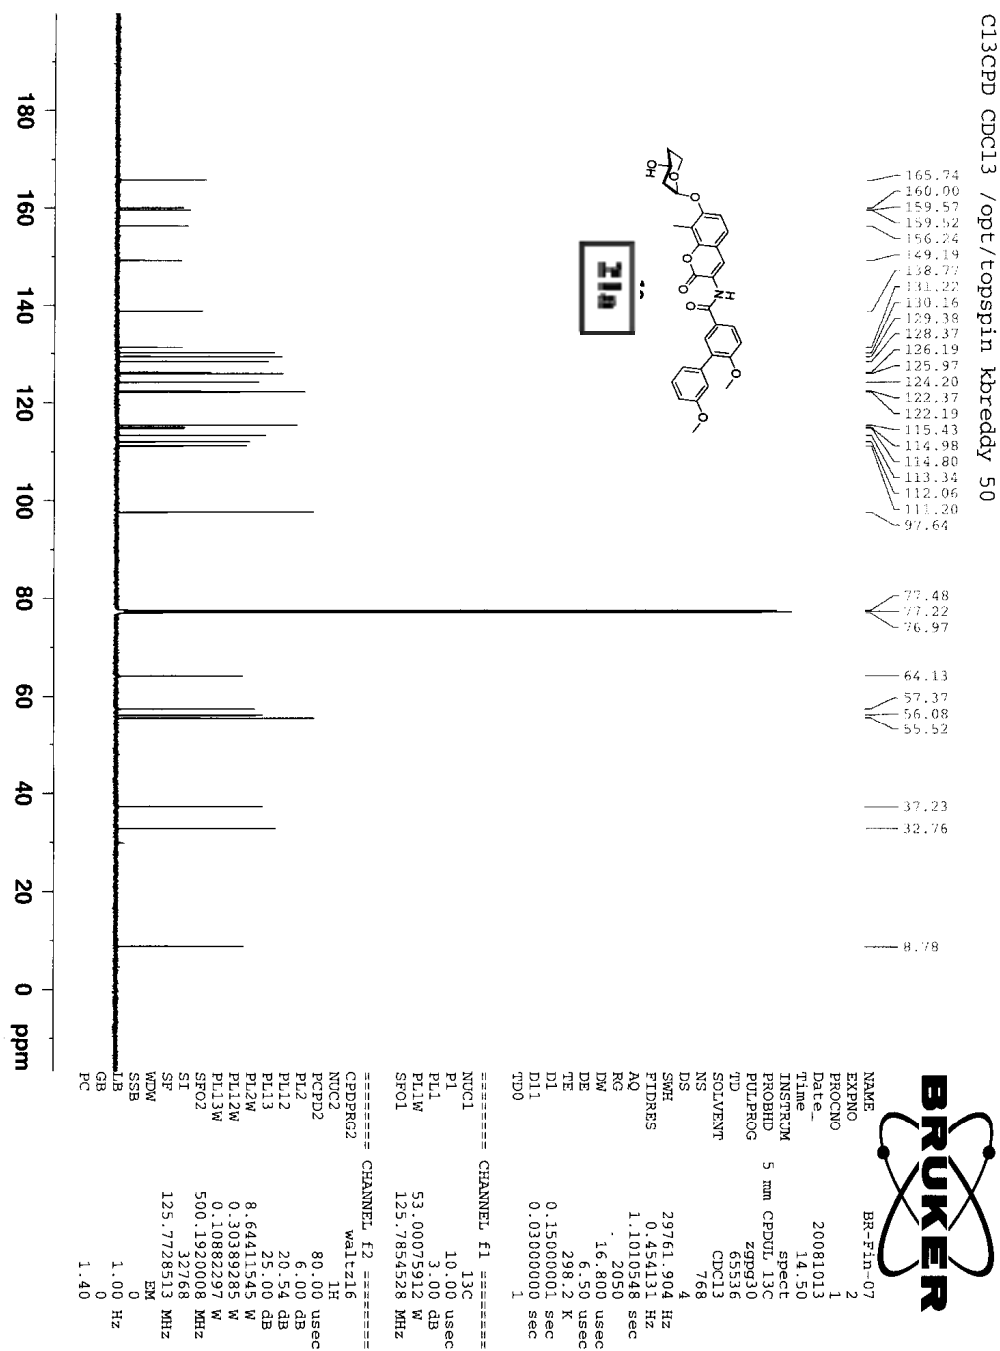



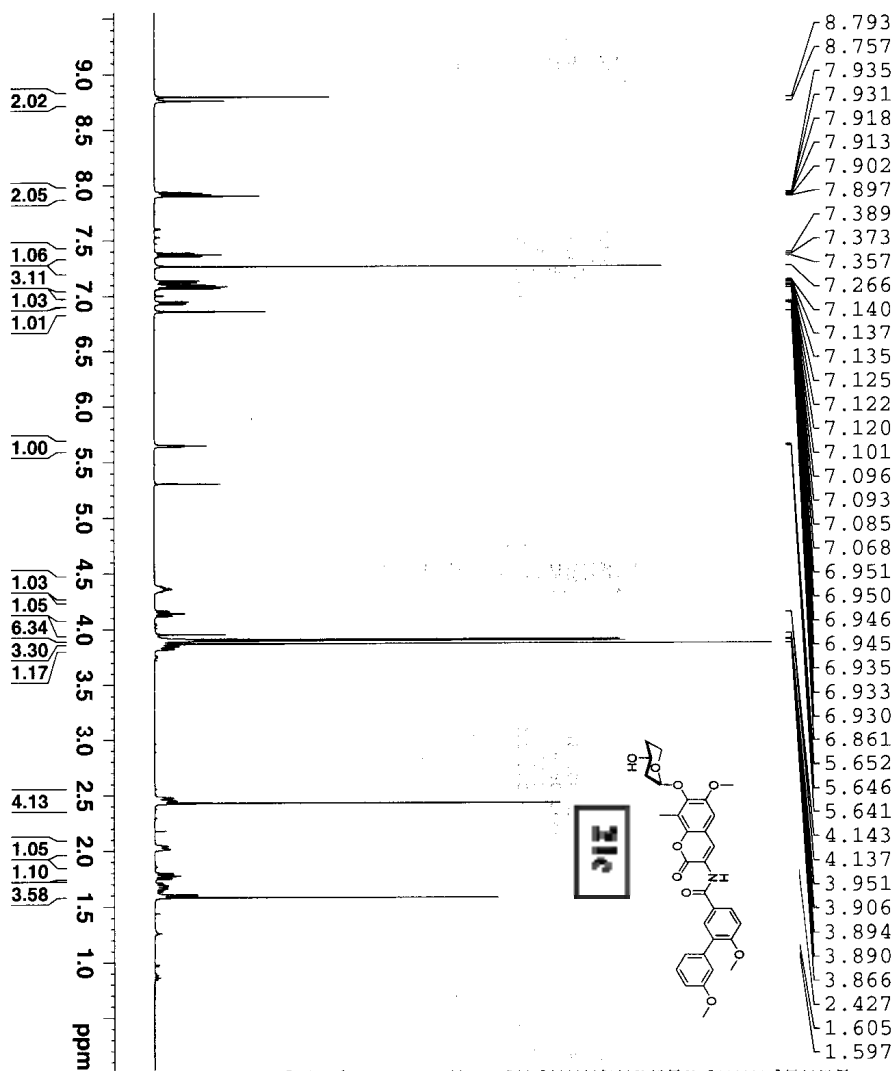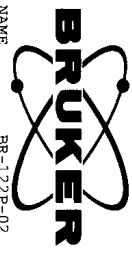

```

NAME BR-122P-02
EXPNO 1
PROCNO 1
Date_ 20090608
Time 12.34
INSTRUM spect
PROBHD 5 mm CPDUL 13C
PULPROG zg30
TD 65536
SOLVENT CDCl3
NS 16
DS 2
SFO 10330.578 Hz
FIDRES 0.157632 Hz
AQ 3.171923 sec
RG 2056
DM 48.400 usec
DE 6.50 usec
TE 298.2 K
D1 1.0000000 sec
TDO 1

===== CHANNEL f1 =====
NUC1 1H
P1 15.00 usec
PL1 6.00 dB
PL1W 8.64411545 W
SFO1 500.1300889 MHz
SI 32768
SF 500.1300017 MHz
WDW EM
SSB 0
LB 0
GB 0
PC 1.00
    
```

141

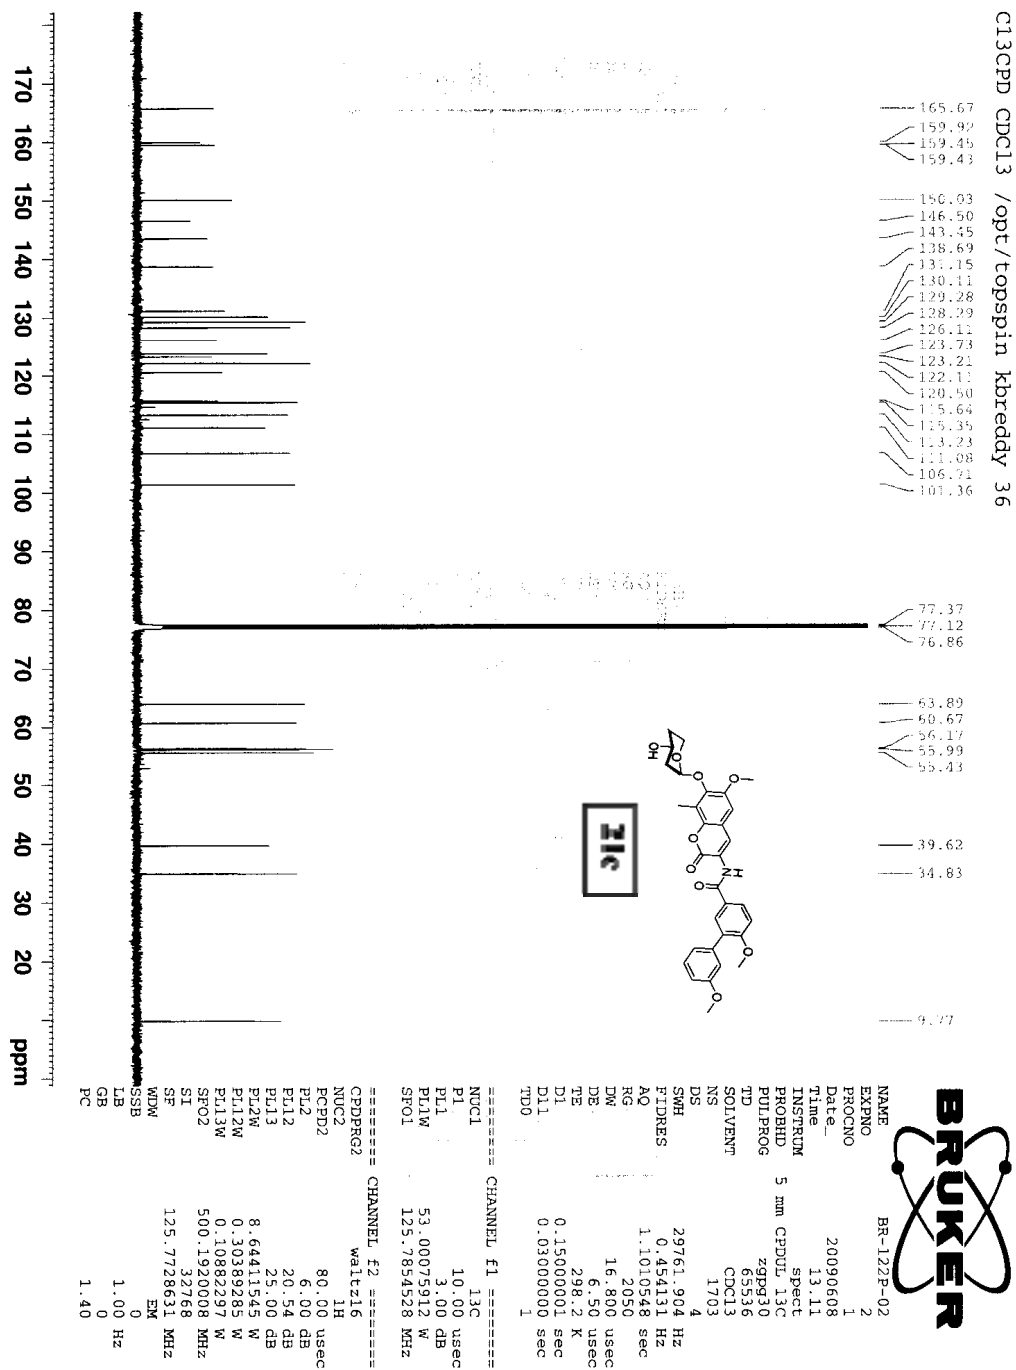

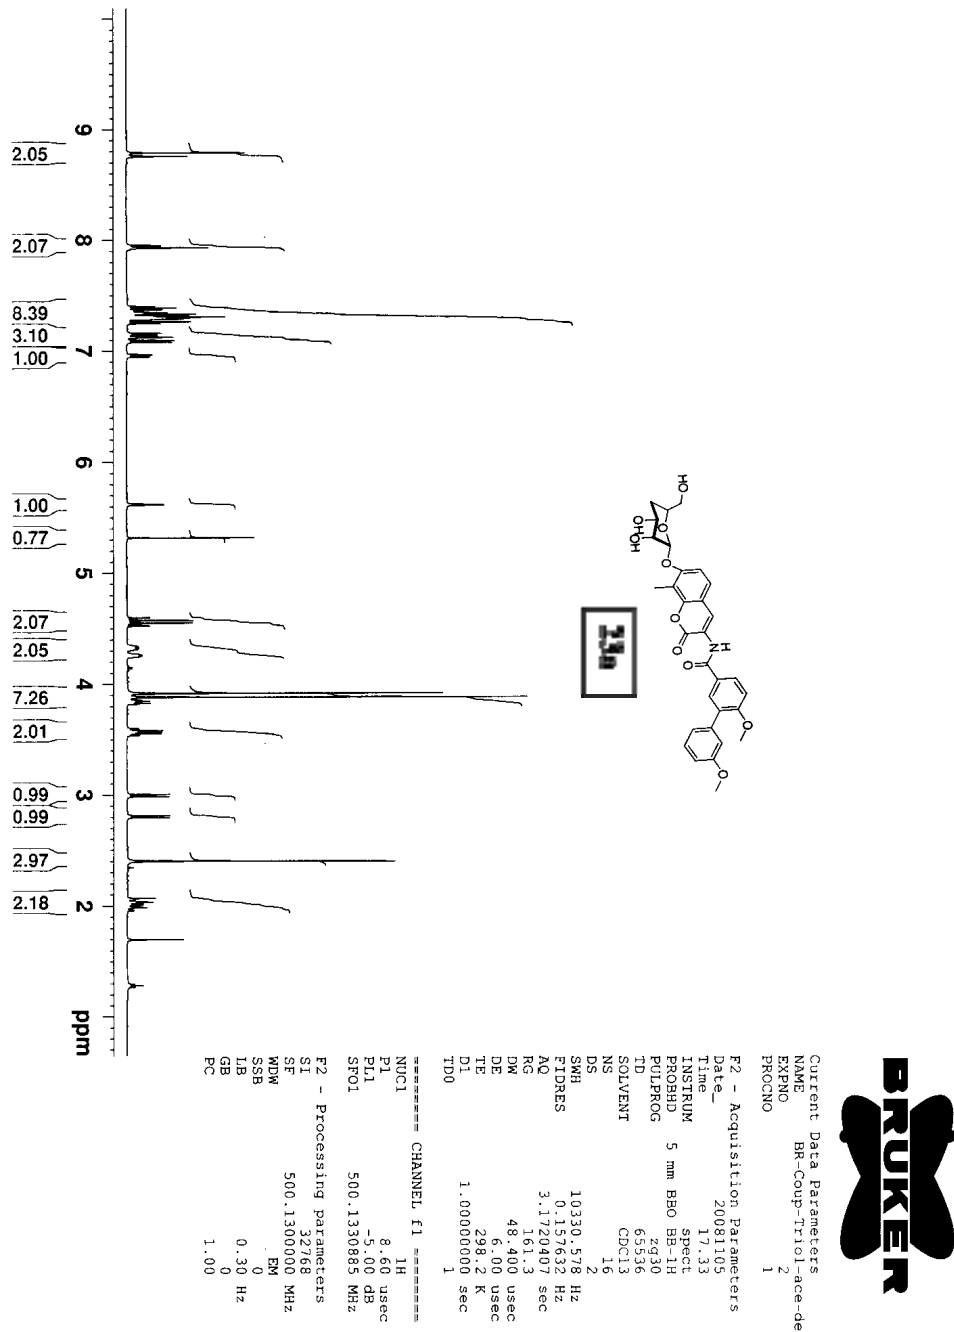

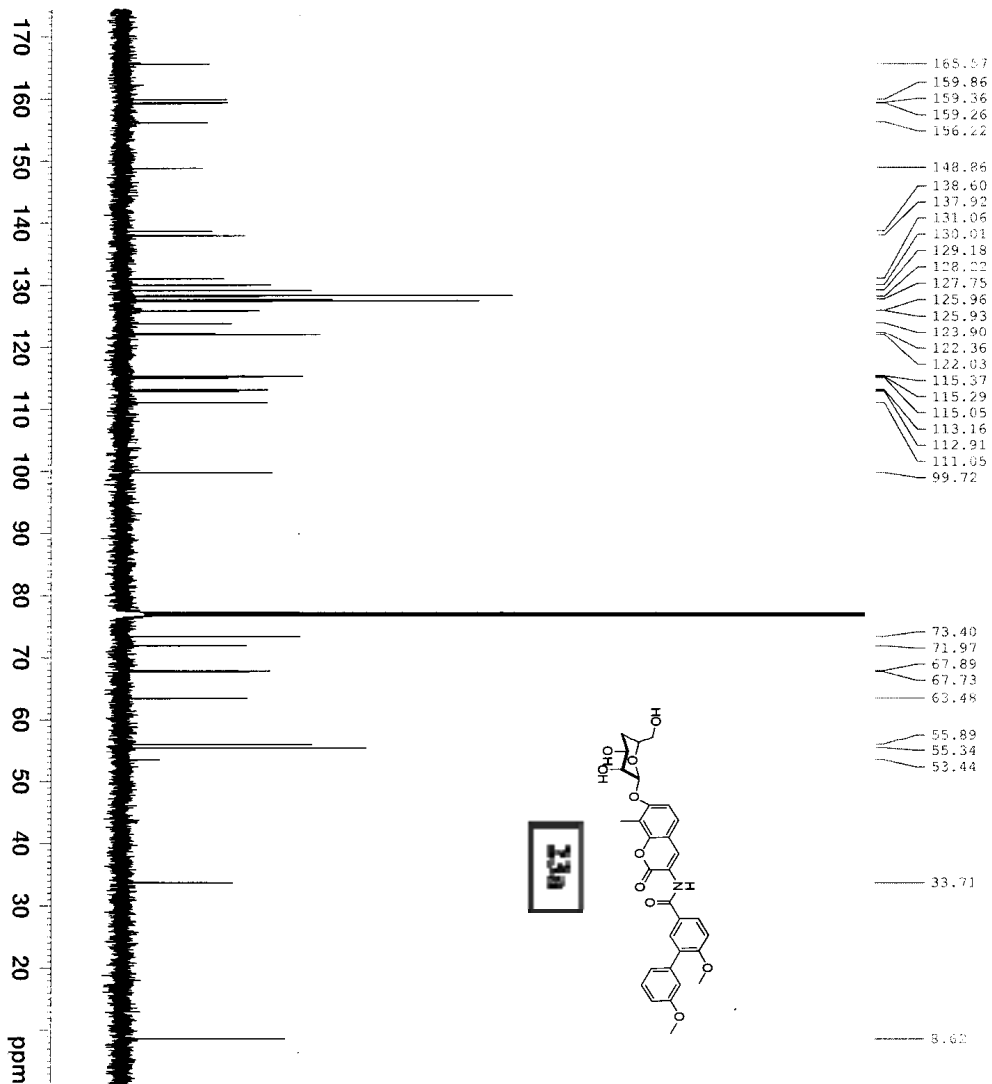

165.57  
159.86  
159.36  
159.26  
156.22  
148.86  
138.60  
137.92  
131.06  
130.01  
129.18  
128.02  
127.75  
125.96  
125.93  
123.90  
122.36  
122.03  
115.37  
115.29  
115.05  
113.16  
112.91  
111.65  
99.72

73.40  
71.97  
67.89  
67.73  
63.45

55.89  
55.34  
53.44

33.71

8.61

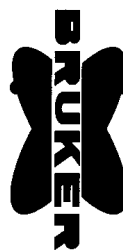

Current Data Parameters  
NAME BR-Coupl-Triol-ace-de-13C  
EXPNO 2  
PROCNO 1

F2 - Acquisition Parameters

File 20091119  
Time 17.9  
INSTRUM spect  
PROBHD 5 mm BBO BB-1H  
PULPROG zgpg30  
TD 65536  
SOLVENT CDCl3  
NS 473  
DS 4  
SWH 30030.029 Hz  
SF 125.760153 MHz  
FIDRES 0.4227 Hz  
AQ 1.091241 sec  
RG 32768  
DM 16.650 usec  
DE 6.00 usec  
TE 298.2 K  
D1 0.1500001 sec  
d11 0.0300000 sec  
DELTA 0.0500000 sec  
ID0 1

===== CHANNEL f1 =====

NUC1 13C  
P1 8.90 usec  
PL1 -1.15 dB  
SFO1 125.7703643 MHz

===== CHANNEL f2 =====

CPDPRG2 waltz16  
NUC2 1H  
P2 95.10 usec  
PL2 -5.00 dB  
SFO2 500.1320005 MHz

F2 - Processing parameters

SI 32768  
SF 125.7577890 MHz  
WDW EM  
SSB 0  
GB 0  
PC 1.40

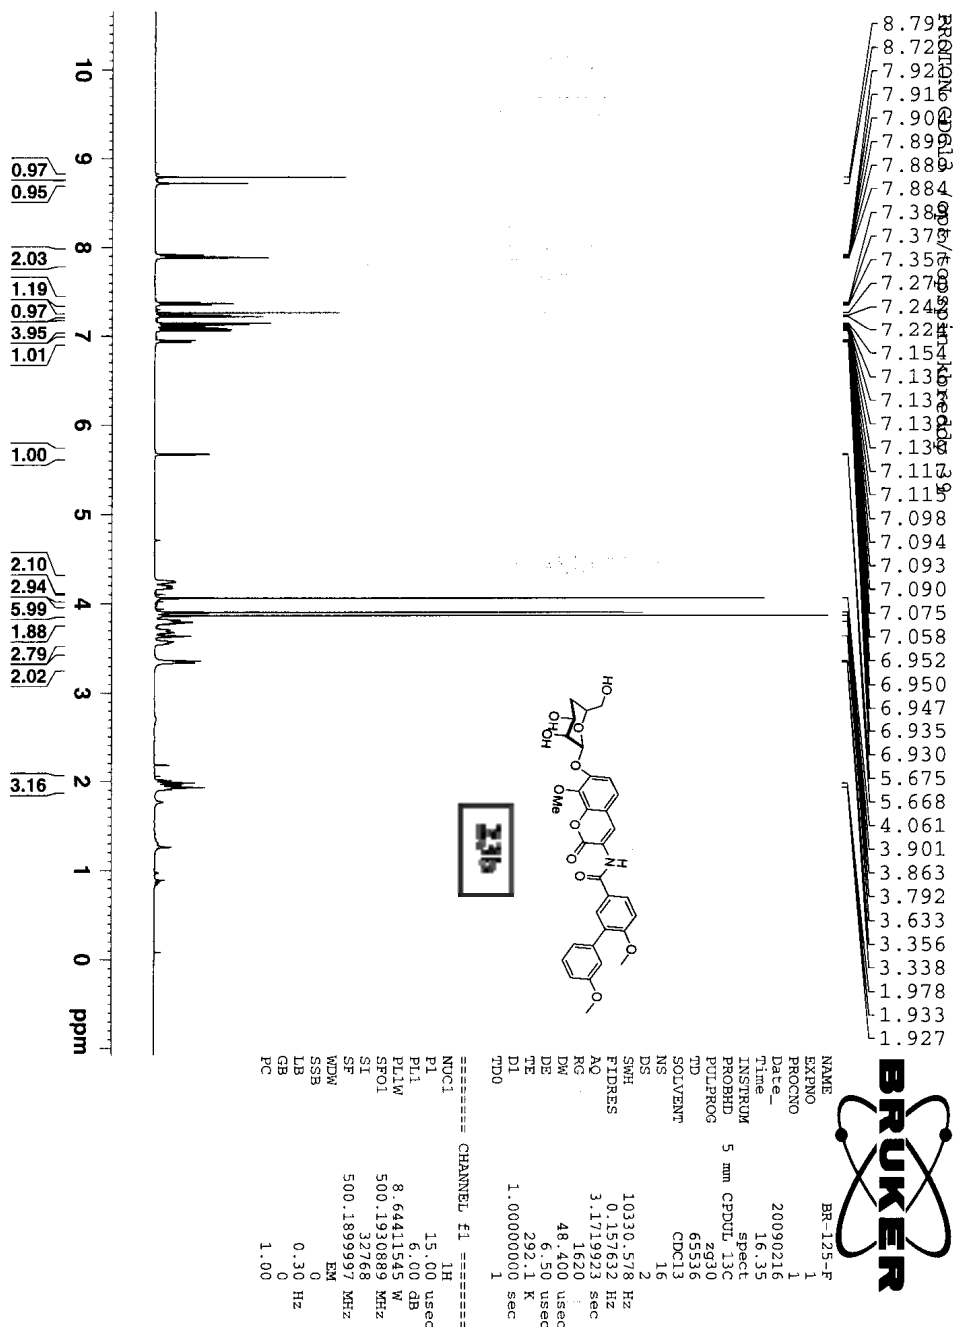

216

Cl3CPD CDCl3 /opt/topspin kbreddy 39

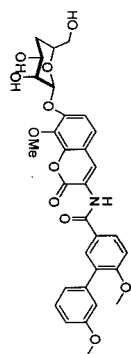

**33b**

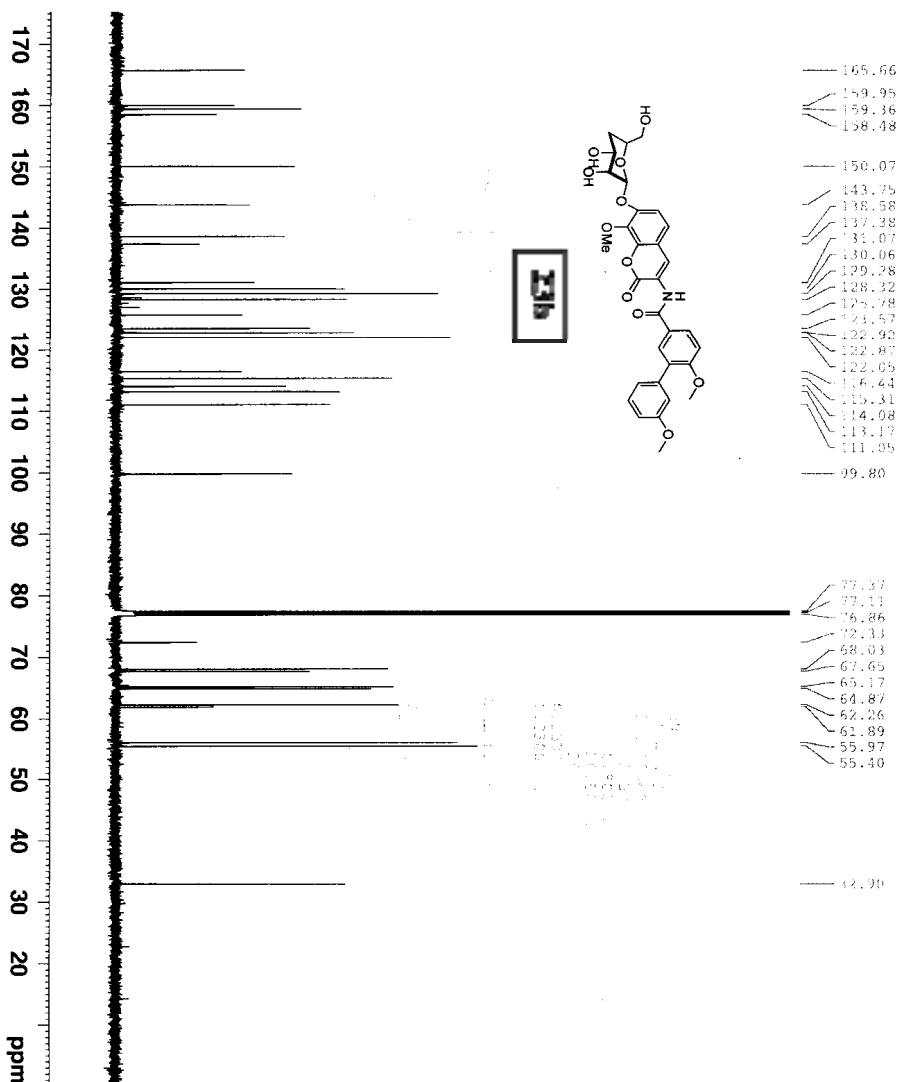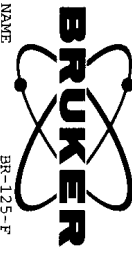

```

NAME          BR-125-F
EXPNO         2
PROCNO        1
Date_         20090216
Time         16.46
INSTRUM       spect
PROBHD        5 mm CPDUL 13C
PULPROG       zgpg30
TD            65536
SOLVENT       CDCl3
NS            512
DS            4
SWH           29761.904 Hz
FIDRES        0.454131 Hz
AQ            1.1010548 sec
RG            2050
DM            16.800 usec
DE            .6.50 usec
TE            297.5 K
D1            0.15000001 sec
D11           0.03000000 sec
TDO           1

===== CHANNEL f1 =====
NUC1          13C
P1            10.00 usec
PL1           3.00 dB
PL1W          53.00075912 W
SFO1         125.7854528 MHz

===== CHANNEL f2 =====
CPDPRG2       waltz16
NUC2          1H
PCPD2         80.00 usec
PL2           6.00 dB
PL12          20.54 dB
PL1W          25.00 dB
PL2W          8.64441545 W
PL13W         0.30389285 W
SFO2         500.1920008 MHz
SI            32768
SF           125.7728676 MHz
WDW           EM
SSB           0
LB            1.00 Hz
GB            0
PC            1.40
    
```

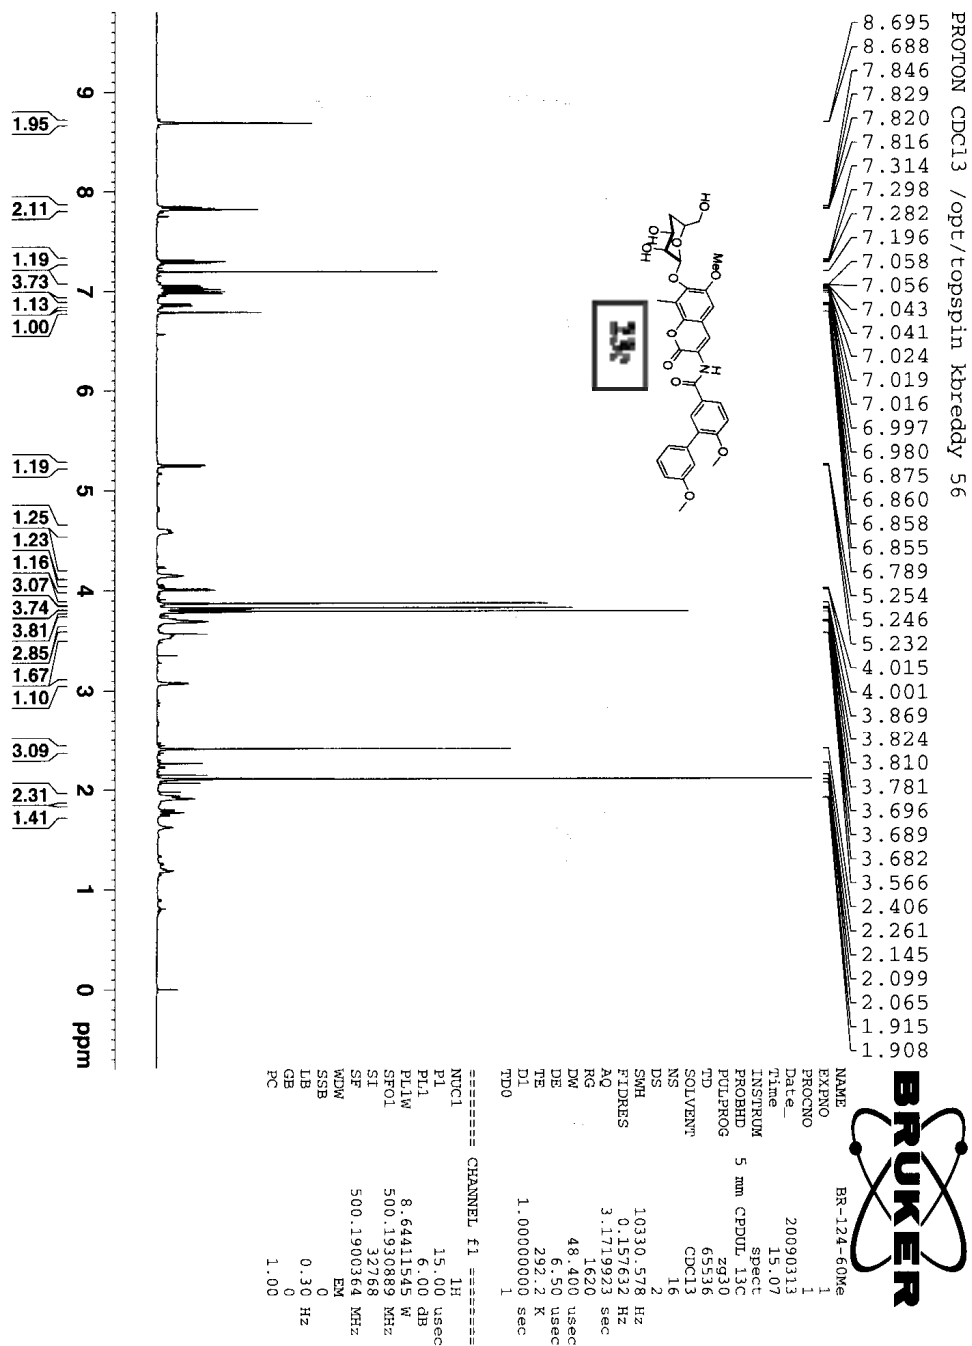

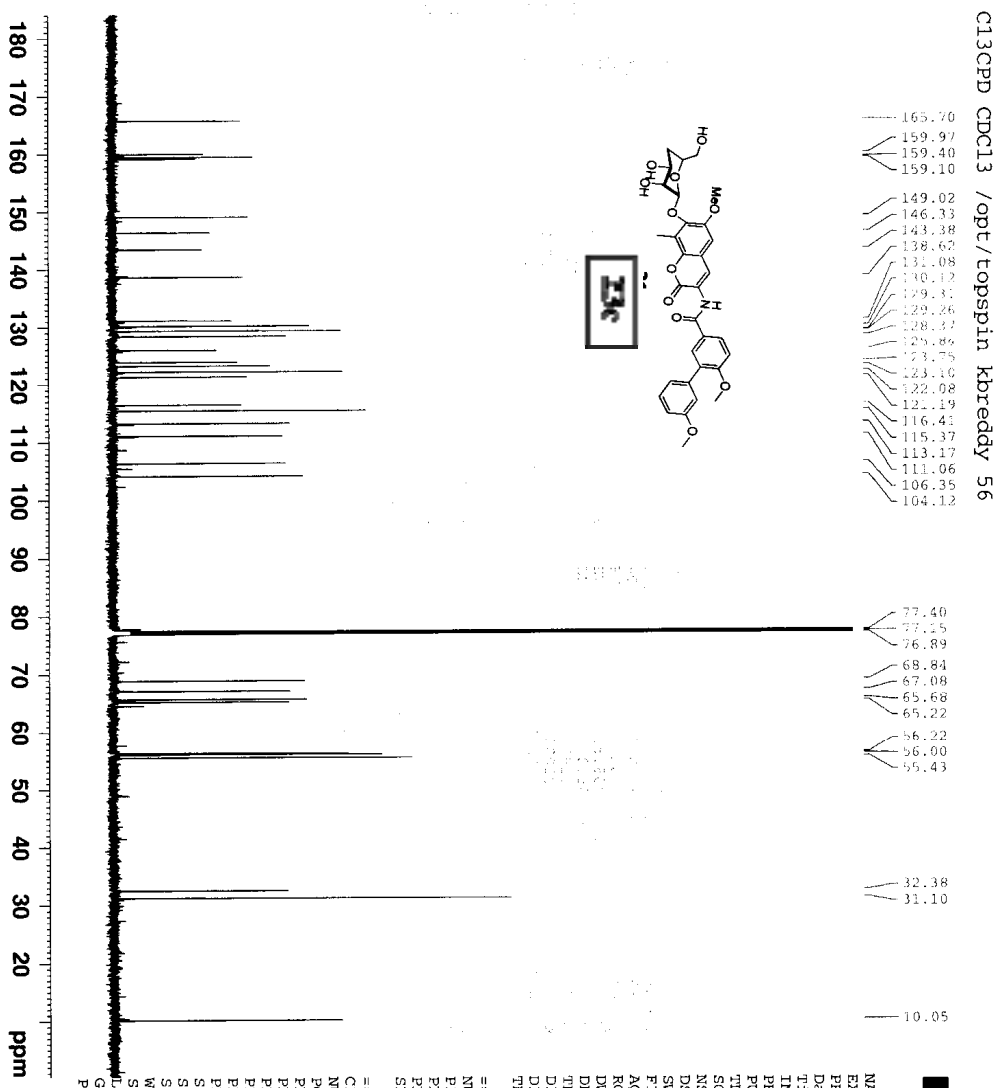

C13CPD CDCl3 /opt/topspin kbreddy 56

|        |
|--------|
| 165.70 |
| 159.97 |
| 159.40 |
| 159.10 |
| 149.02 |
| 146.33 |
| 143.38 |
| 138.62 |
| 131.08 |
| 130.12 |
| 129.87 |
| 129.26 |
| 128.37 |
| 125.86 |
| 123.75 |
| 123.16 |
| 122.08 |
| 121.19 |
| 116.45 |
| 115.37 |
| 113.17 |
| 111.06 |
| 106.35 |
| 104.12 |

|       |
|-------|
| 77.40 |
| 77.25 |
| 76.89 |
| 68.84 |
| 67.08 |
| 65.68 |
| 65.22 |
| 56.22 |
| 56.00 |
| 55.43 |
| 32.38 |
| 31.10 |
| 10.05 |

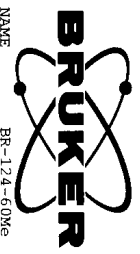

```

NAME BR-124-60Me
EXPNO 2
PROCNO 1
Date_ 20090313
Time 15.24
INSTRUM spect
PROBHD 5 mm CPDUL 13C
PULPROG zgpg30
TD 65536
SOLVENT CDCl3
NS 768
DS 4
SWH 29761.904 Hz
FIDRES 0.454131 Hz
AQ 1.1010548 sec
RG 16.2850
DM 16.800 usec
DE 6.50 usec
TE 292.1 K
D1 0.1500001 sec
D11 0.0300000 sec
TDO 1
    
```

```

===== CHANNEL f1 =====
NUC1 13C
P1 10.00 usec
PL1 3.00 dB
PL1W 53.00075912 W
SFO1 125.7854528 MHz
    
```

```

===== CHANNEL f2 =====
CPDPRG2 waltz16
NUC2 1H
ROPD2 80.00 usec
PL2 6.00 dB
PL12 20.54 dB
PL13 25.00 dB
PL1Z 8.64411545 W
PL1Z 0.30389285 W
PL1Z 0.10882297 W
SFO2 500.1920008 MHz
SI 32768
SF 125.7728634 MHz
WDW EM
SSB 0
GB 1.00 Hz
PC 1.40
    
```



PROTON CDCl3 / optw topspin kbreddy 47

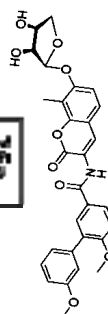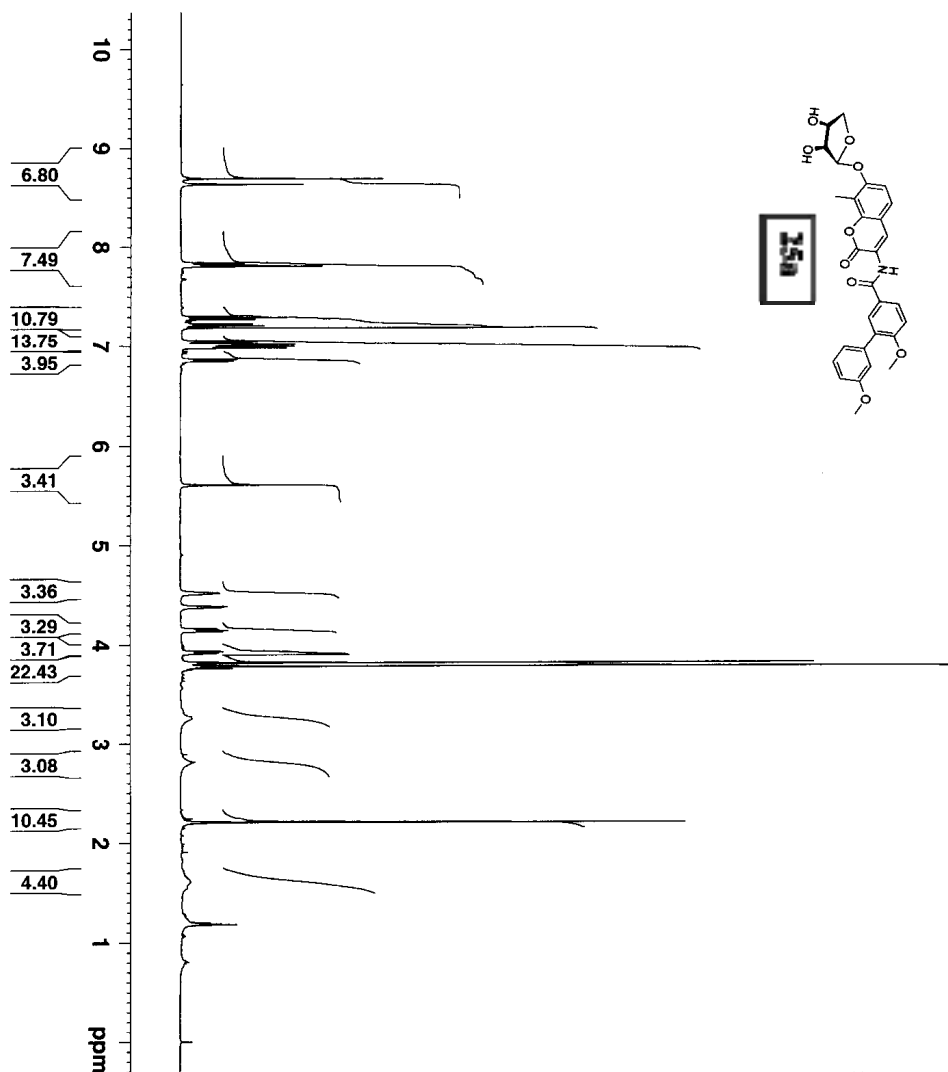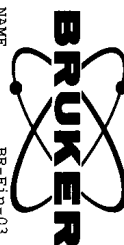

```

NAME BR-FIN-03
EXPNO 1
PROCNO 1
Date_ 20081013
Time 13.30
INSTRUM spect
PROBHD 5 mm CPDUL 13C
PULPROG zg30
TD 65536
SOLVENT CDCl3
NS 16
DS 2
SWH 10330.578 Hz
FIDRES 0.157632 Hz
AQ 3.171923 sec
RG 2050
DM 48.400 usec
DE 6.50 usec
TE 298.2 K
D1 1.00000000 sec
TD0 1

===== CHANNEL f1 =====
NUC1 1H
P1 15.00 usec
PL1 6.00 dB
PL1W 8.64411545 W
SFO1 500.1930889 MHz
SI 32768
SF 500.1900404 MHz
WDW EM
SSB 0
LB 0.30 Hz
GB 0
PC 1.00
    
```

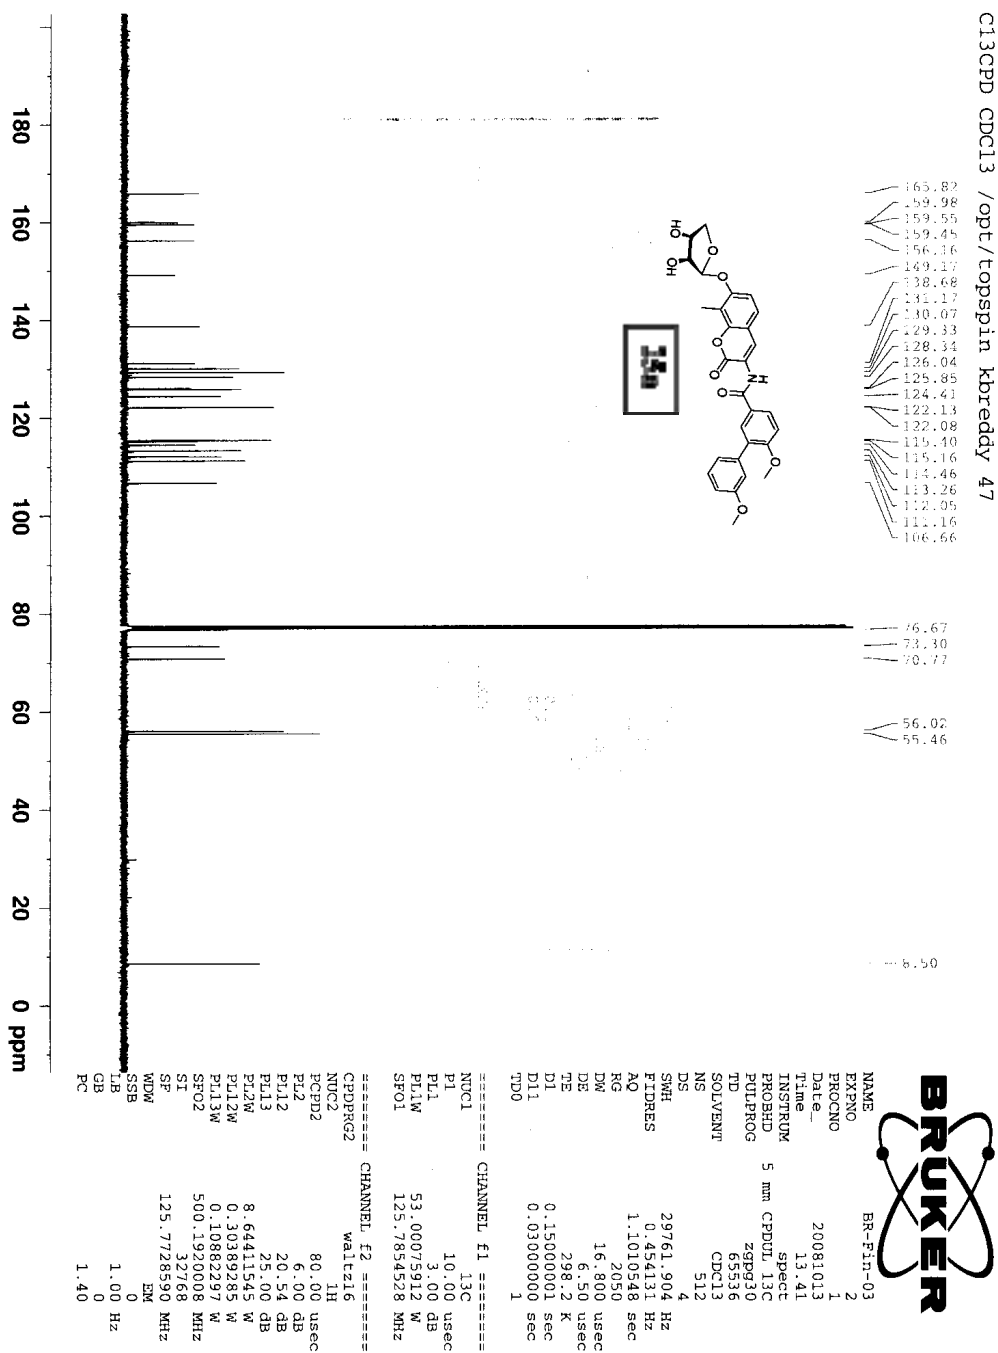

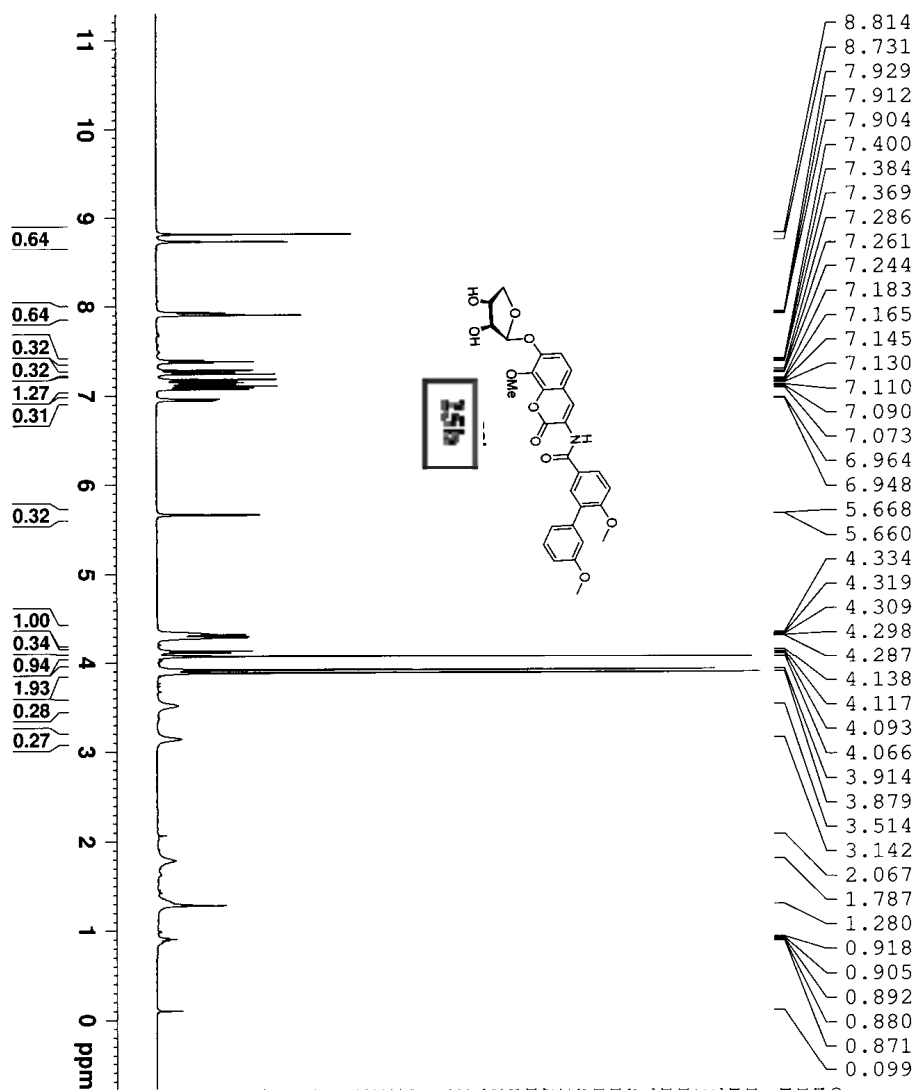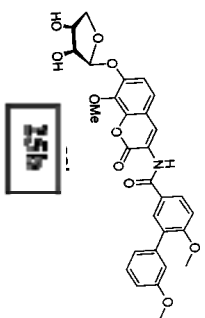

- 8.814
- 8.731
- 7.929
- 7.912
- 7.904
- 7.400
- 7.384
- 7.369
- 7.286
- 7.261
- 7.244
- 7.183
- 7.165
- 7.145
- 7.130
- 7.110
- 7.090
- 7.073
- 6.964
- 6.948
- 5.668
- 5.660
- 4.334
- 4.319
- 4.309
- 4.298
- 4.287
- 4.138
- 4.117
- 4.093
- 4.066
- 3.914
- 3.879
- 3.514
- 3.142
- 2.067
- 1.787
- 1.280
- 0.918
- 0.905
- 0.892
- 0.880
- 0.871
- 0.099

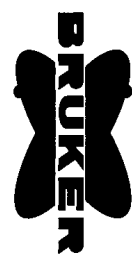

235

Current Data Parameters  
 NAME BR-SMsm-80Me-280-02  
 EXPNO 4  
 PROCNO 1

F2 - Acquisition Parameters  
 Date\_ 20090528  
 Time 9.01  
 INSTRUM spect  
 PROBHD 5 mm BBO BB-1H  
 PULPROG zg30  
 TD 65536  
 SOLVENT CDCl3  
 NS 16  
 DS 2  
 SWH 10330.578 Hz  
 FIDRES 0.157632 Hz  
 AQ 3.1720407 sec  
 RG 203.2  
 DM 48.400 usec  
 DE 6.00 usec  
 TE 298.2 K  
 D1 1.00000000 sec  
 TDO 1

===== CHANNEL f1 =====  
 NUC1 1H  
 P1 8.60 usec  
 PL1 -5.00 dB  
 SFO1 500.1330885 MHz

F2 - Processing Parameters  
 SI 32768  
 SF 500.1300000 MHz  
 WDW EM  
 SSB 0  
 GB 0  
 PC 1.00

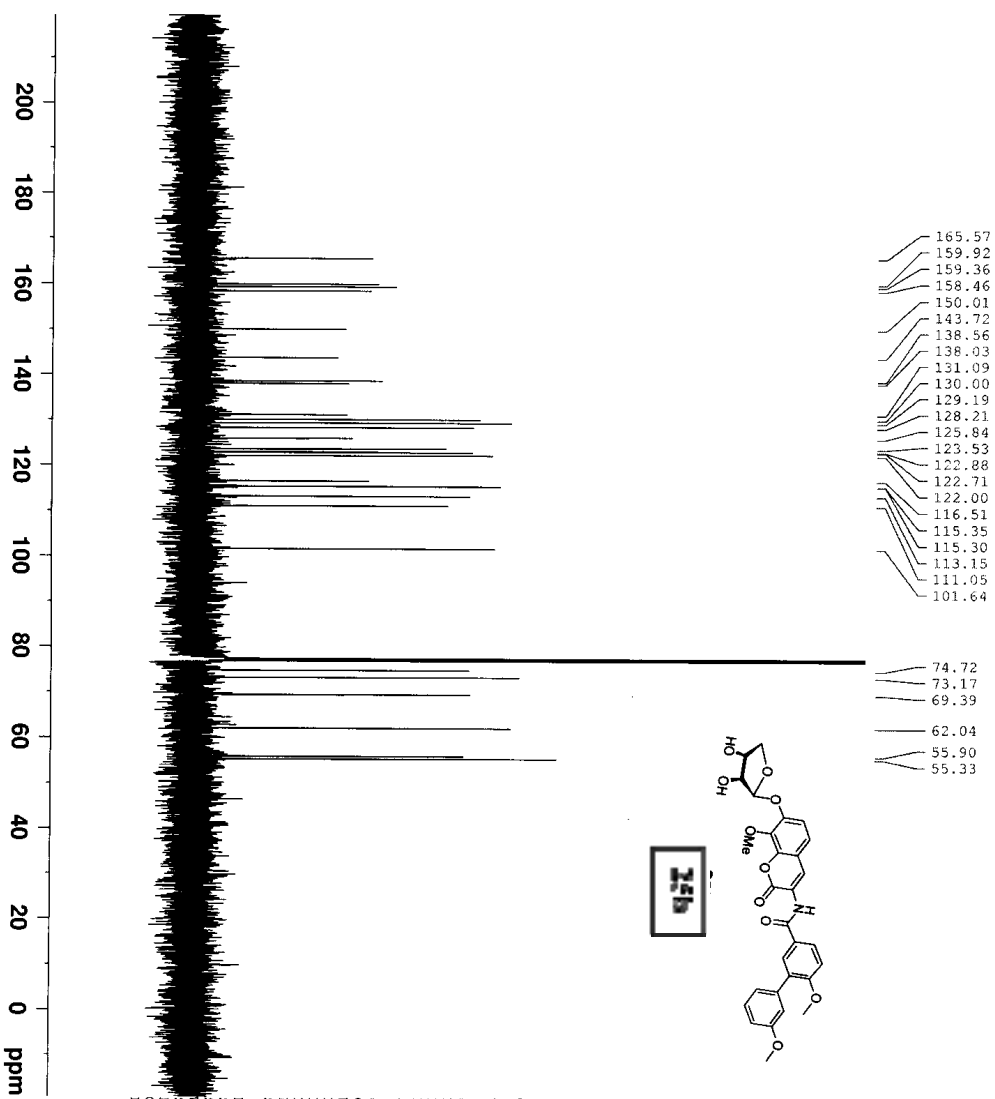

- 165.57
- 159.92
- 159.36
- 158.46
- 150.01
- 143.72
- 138.56
- 138.03
- 131.09
- 130.00
- 129.19
- 128.21
- 125.84
- 123.53
- 122.88
- 122.71
- 122.00
- 116.51
- 115.35
- 115.30
- 113.15
- 111.05
- 101.64

- 74.72
- 73.17
- 69.39
- 62.04
- 55.90
- 55.33

215b

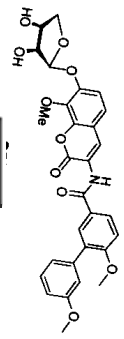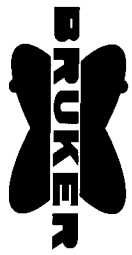

Current Data Parameters  
 NAME BR-SMmr-90Me-13C-280-02  
 EXPNO 1  
 PROCNO 1

F2 - Acquisition Parameters  
 Date\_ 20090528  
 Time 9.07  
 INSTRUM spect  
 PROSHD 5 mm BBO BB-1H  
 PULPROG zgpg30  
 TD 65536  
 ID CDC13  
 SOLVENT CDCl3  
 NS 399  
 DS 4  
 SMH 30030.024 Hz  
 FIDRES 0.458222 Hz  
 AQ 1.0912410 sec  
 RG 18390.4  
 DW 16.650 usec  
 DE 6.00 usec  
 TE 298.2 K  
 D1 0.15000001 sec  
 d11 0.03000000 sec  
 DELTA 0.05000000 sec  
 ID0 1

===== CHANNEL f1 =====  
 NUC1 13C  
 P1 8.00 usec  
 PL1 -1.15 dB  
 SFO1 125.7703643 MHz

===== CHANNEL f2 =====  
 CPDPRG2 waltz16  
 NUC2 1H  
 PCPD2 95.00 usec  
 PL2 -5.00 dB  
 PL12 15.86 dB  
 PL13 30.00 dB  
 SFO2 500.1320005 MHz

F2 - Processing parameters  
 SI 32768  
 SF 125.7577890 MHz  
 MDW 0  
 SSB 0  
 LB 1.00 Hz  
 GB 0  
 PC 1.40

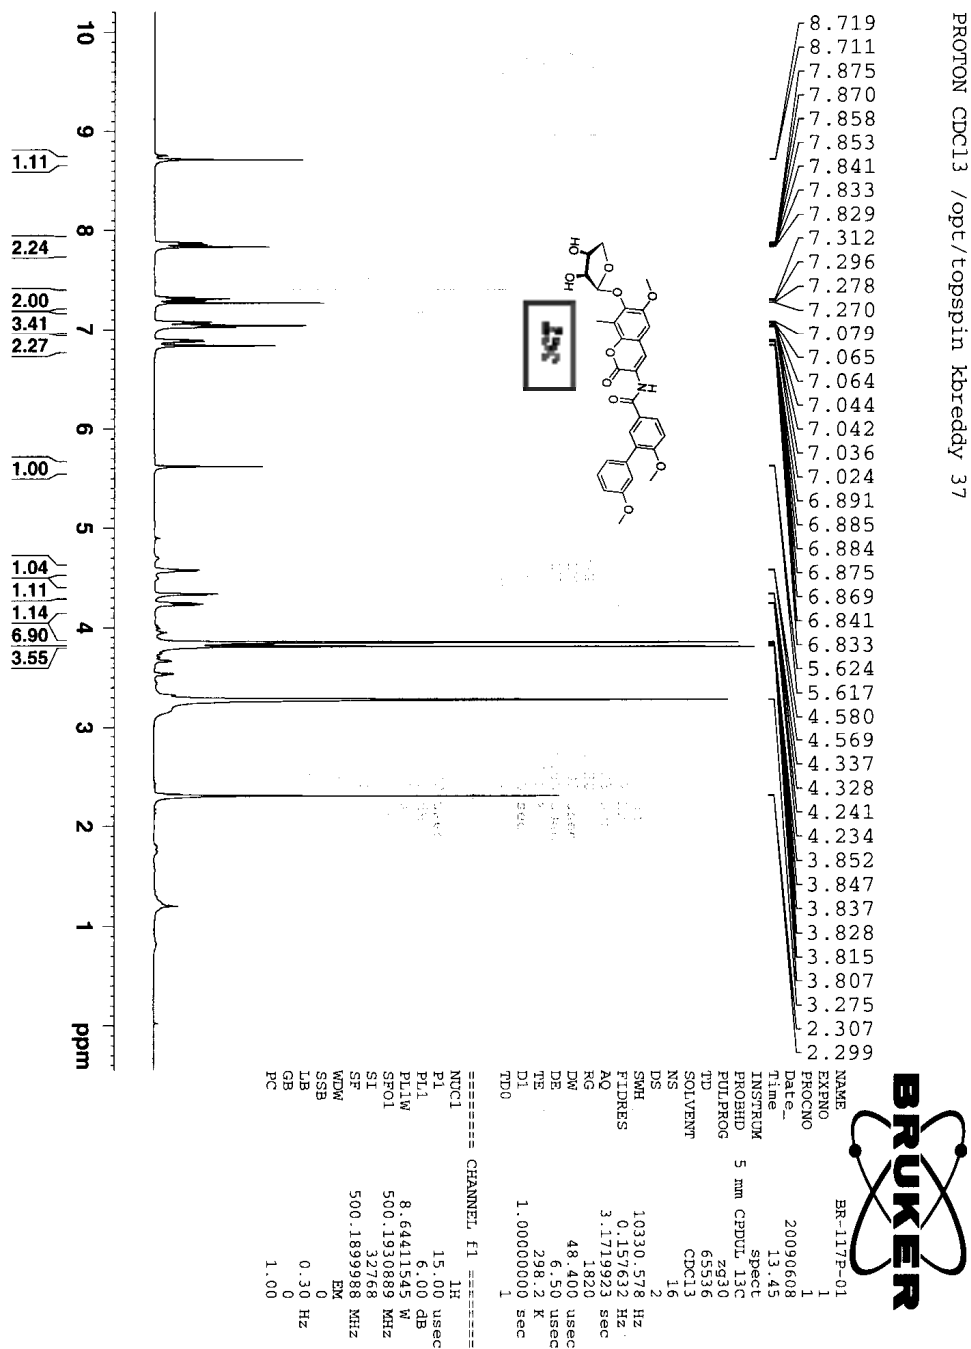

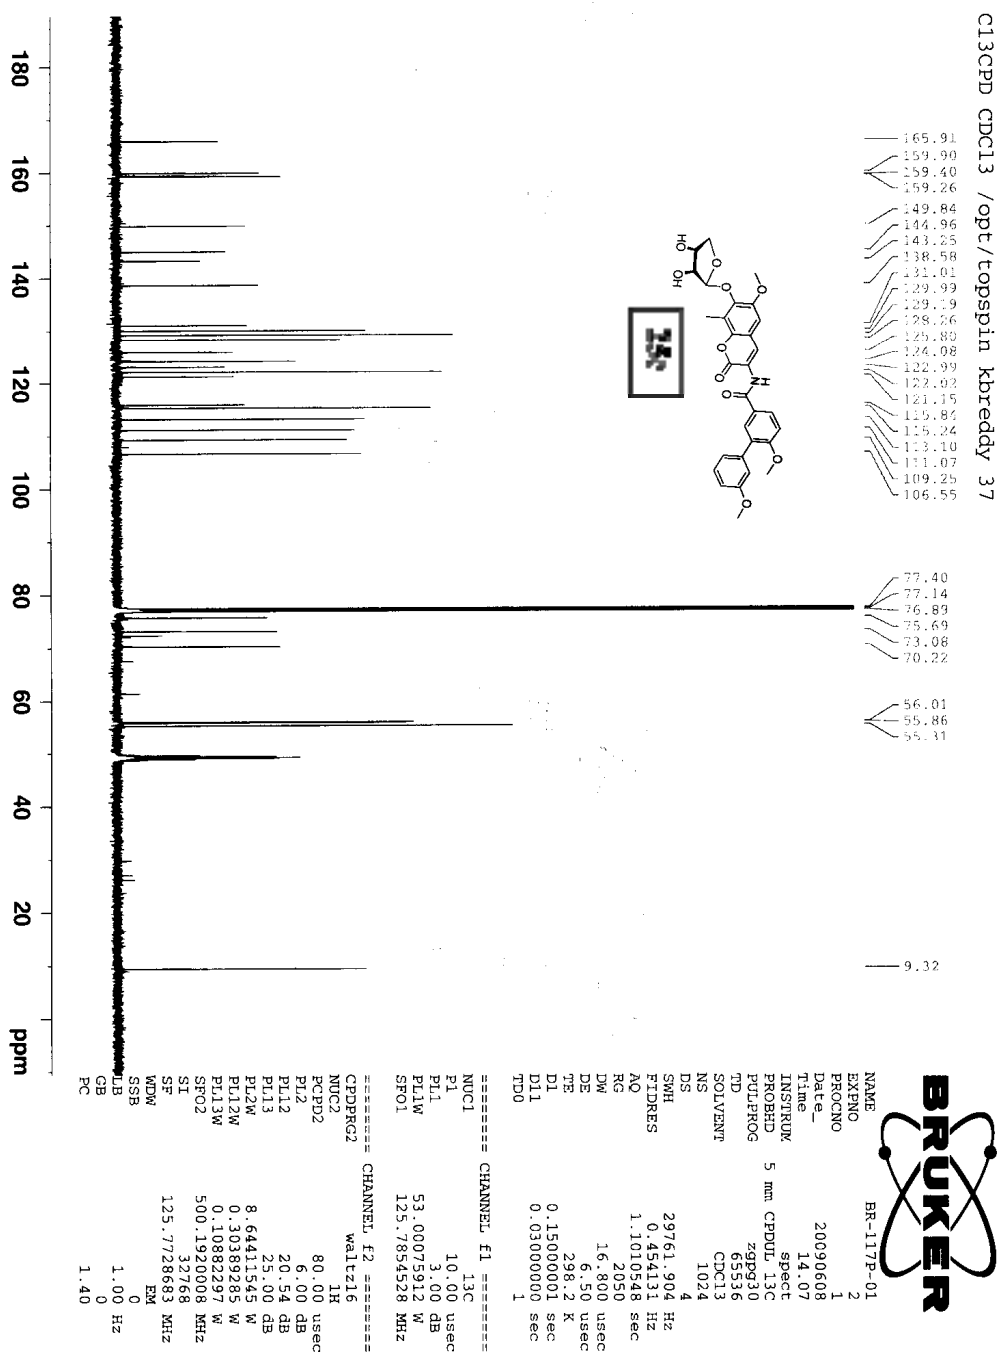

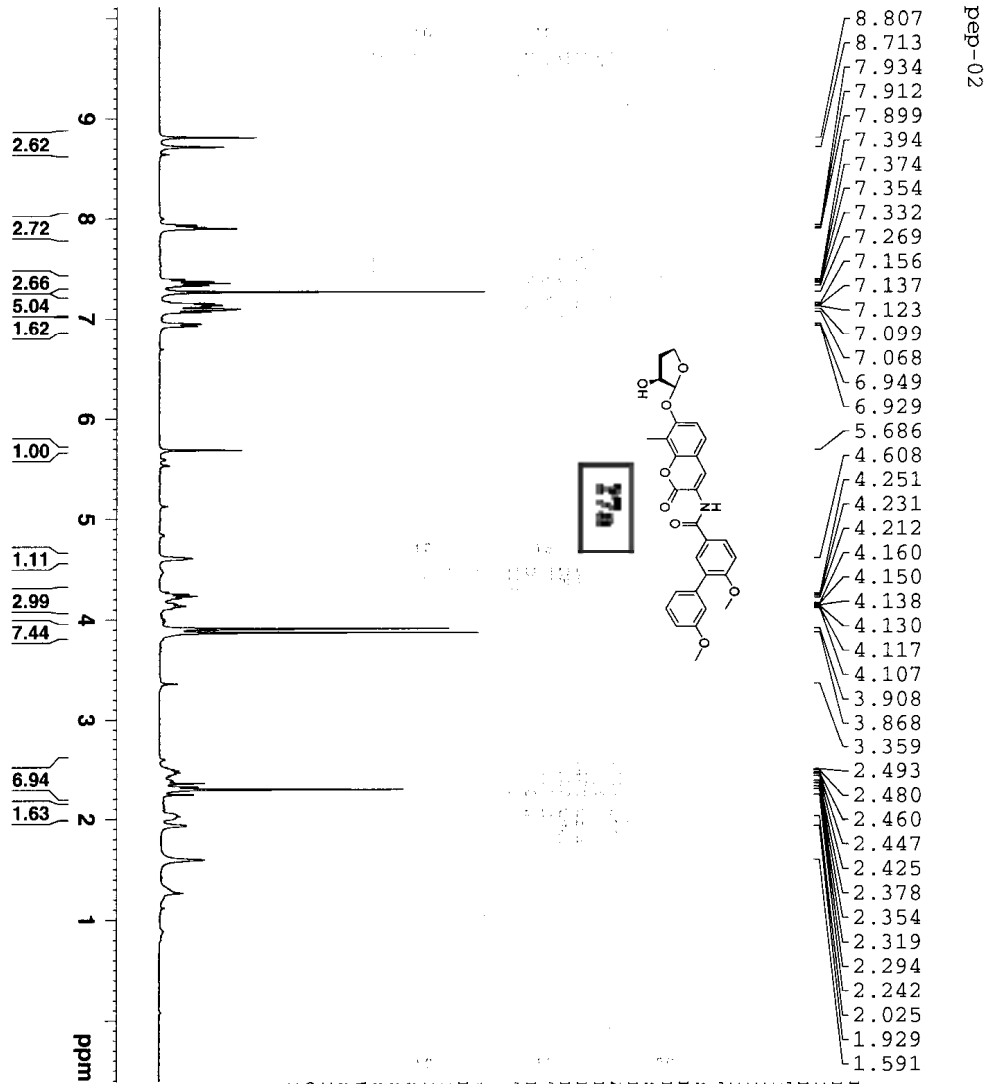

pep-02

- 8.807
- 8.713
- 7.934
- 7.912
- 7.899
- 7.394
- 7.374
- 7.354
- 7.332
- 7.269
- 7.156
- 7.137
- 7.123
- 7.099
- 7.068
- 6.949
- 6.929
- 5.686
- 4.608
- 4.251
- 4.231
- 4.212
- 4.160
- 4.150
- 4.138
- 4.130
- 4.117
- 4.107
- 3.908
- 3.868
- 3.359
- 2.493
- 2.480
- 2.460
- 2.447
- 2.425
- 2.378
- 2.354
- 2.319
- 2.294
- 2.242
- 2.025
- 1.929
- 1.591

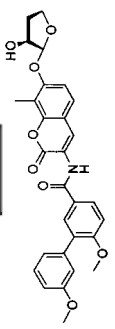

**BRUKER**

```

NAME          BR-5mem-02
EXPNO         1
PROCNO        1
Date_         20081008
Time_         18.00
INSTRUM       dx400
PROBHD        5 mm QNP 1H/13
PULPROG       zgpg30
TD            65536
SOLVENT       CDCl3
NS            16
DS            2
SWH           8278.146 Hz
FIDRES        0.126314 Hz
AQ            3.9584243 sec
RG            406.4
DE            60.400 usec
TE            294.5 K
D1            1.00000000 sec
TD0           1

===== CHANNEL f1 =====
NUC1          13C
P1            10.50 usec
PL            -2.00 dB
SFO1          400.1324710 MHz
SI            32768
SF            400.1300062 MHz
WDW           EM
SSB           0
LB            0.30 Hz
GB            0
PC            1.00
    
```

765

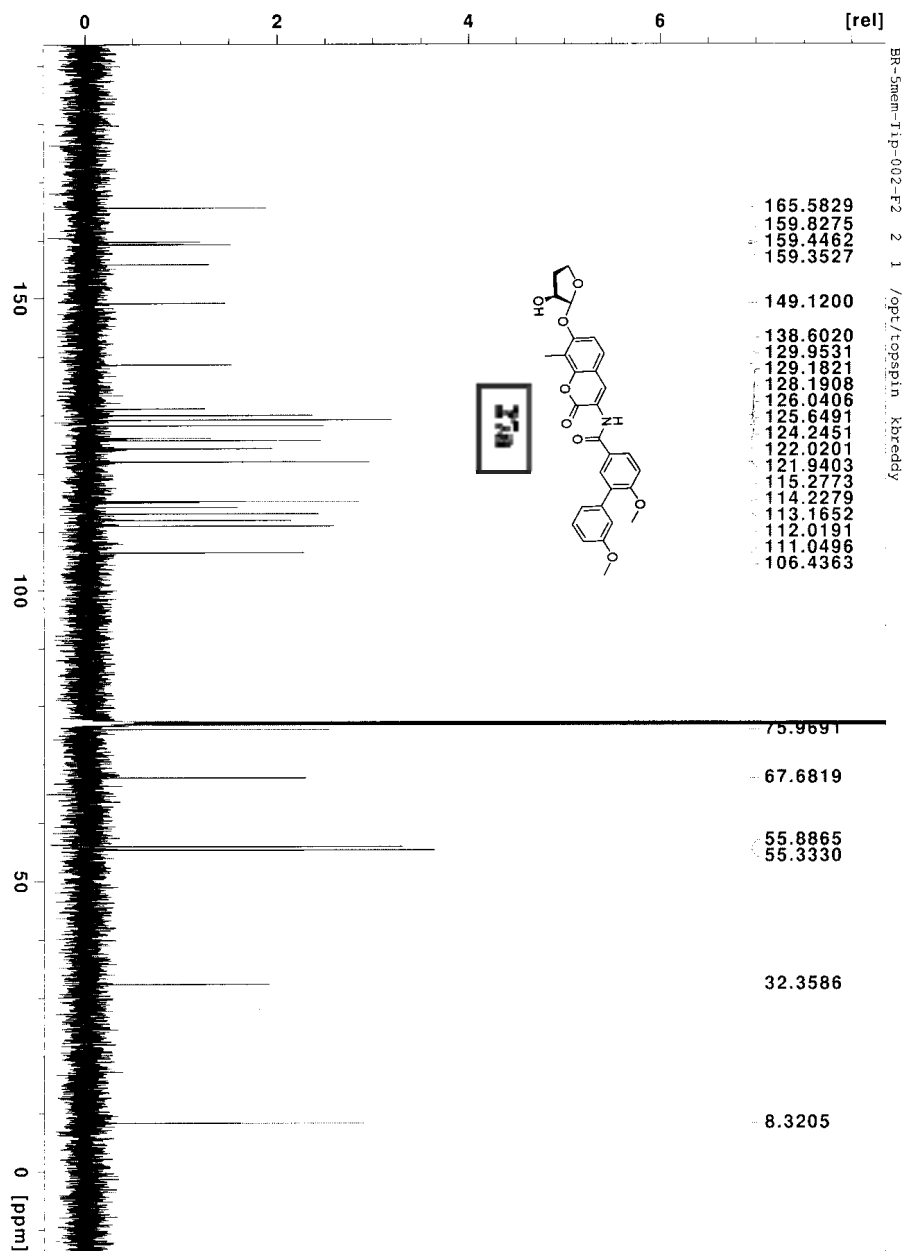



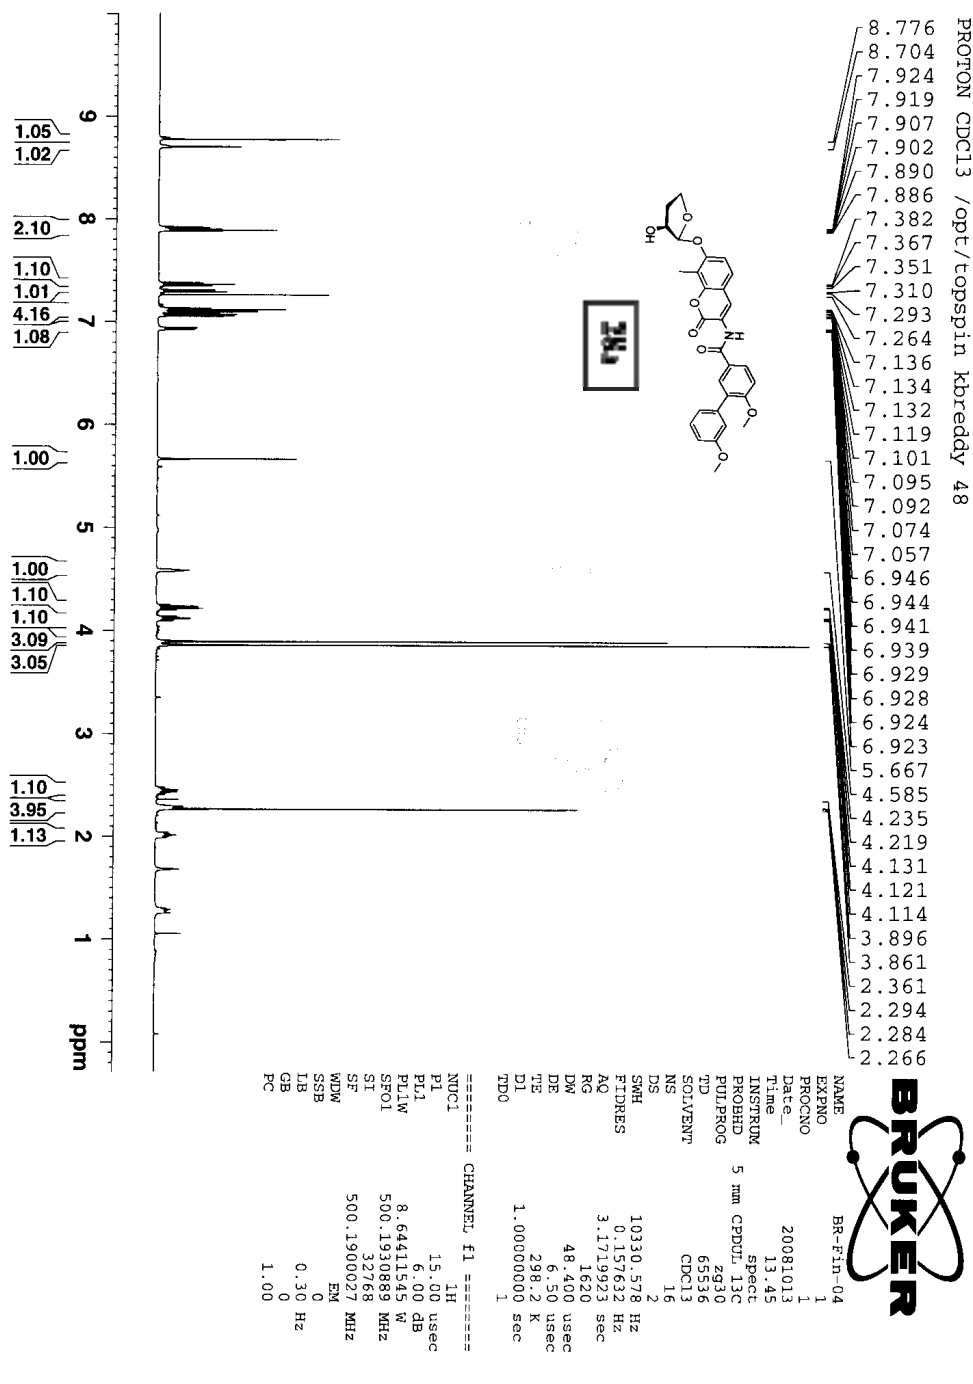

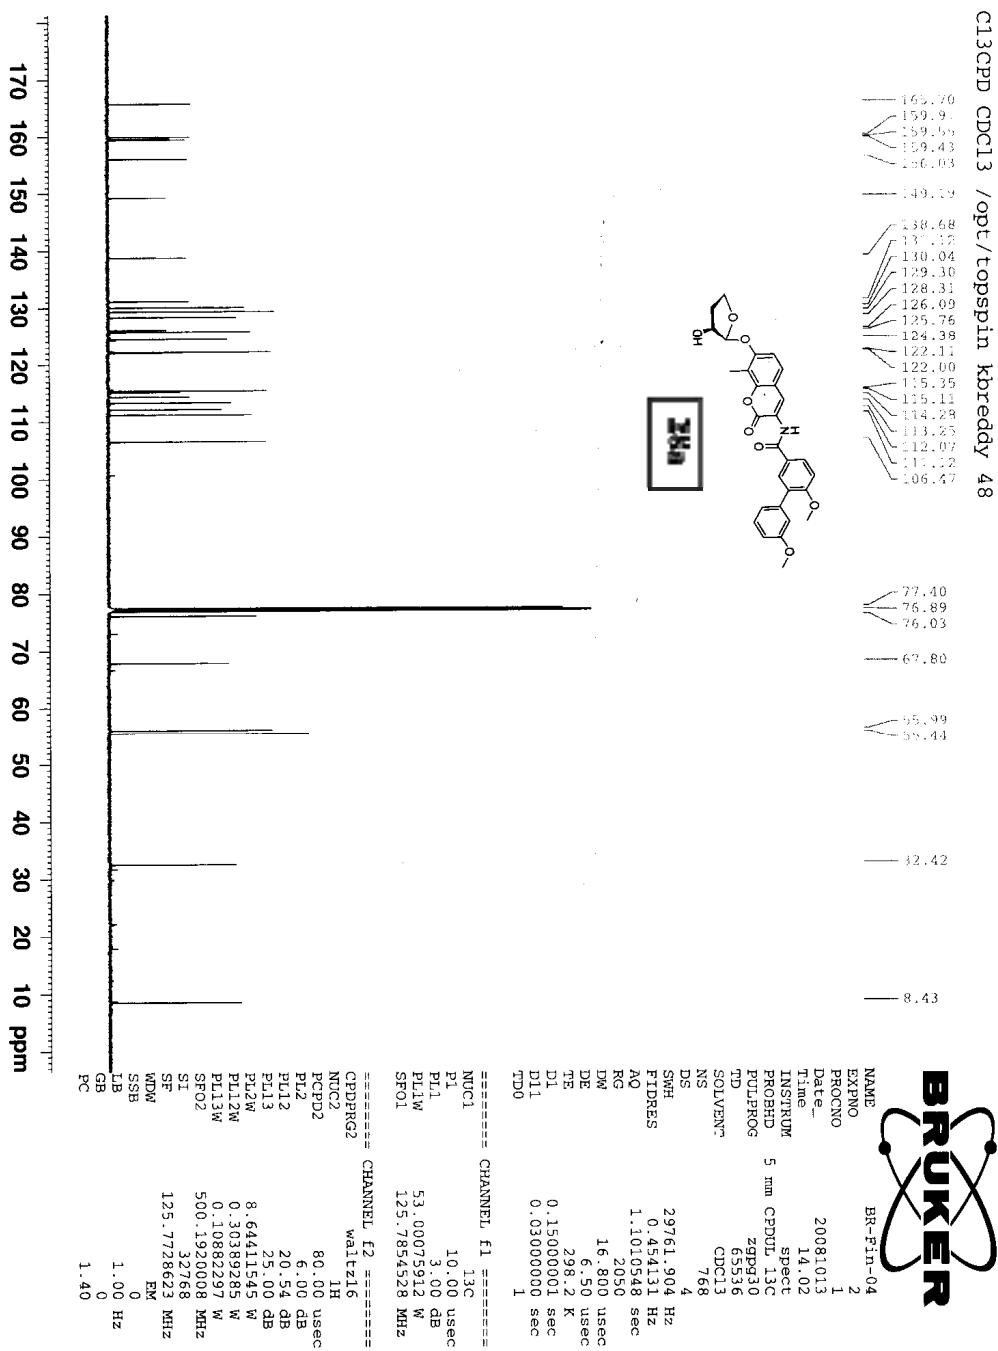

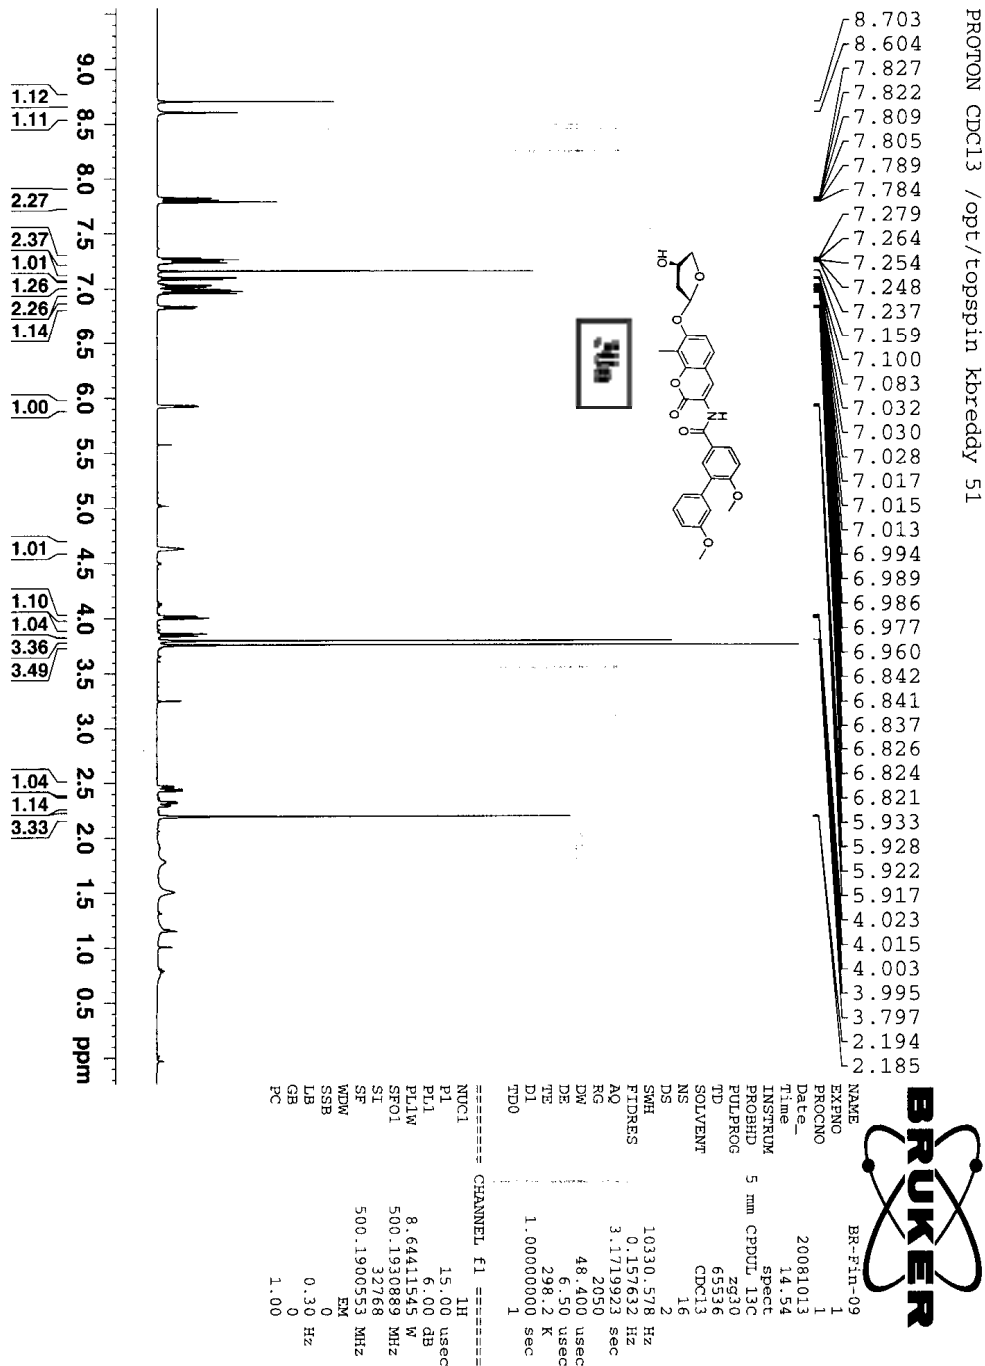

282

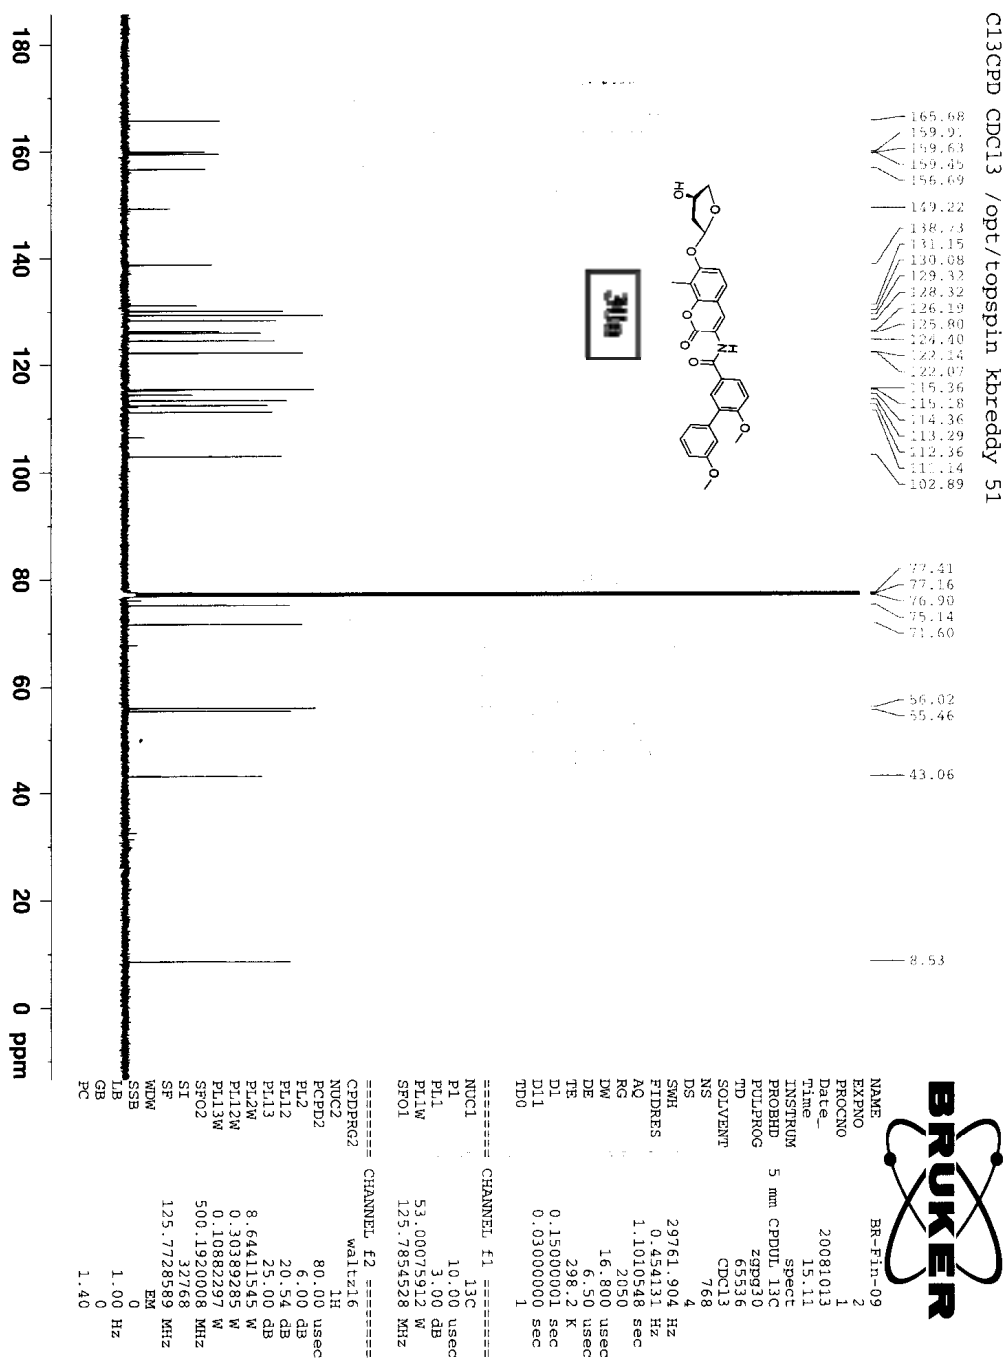

pep-01

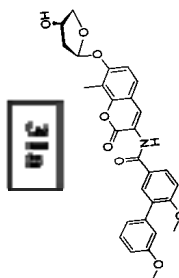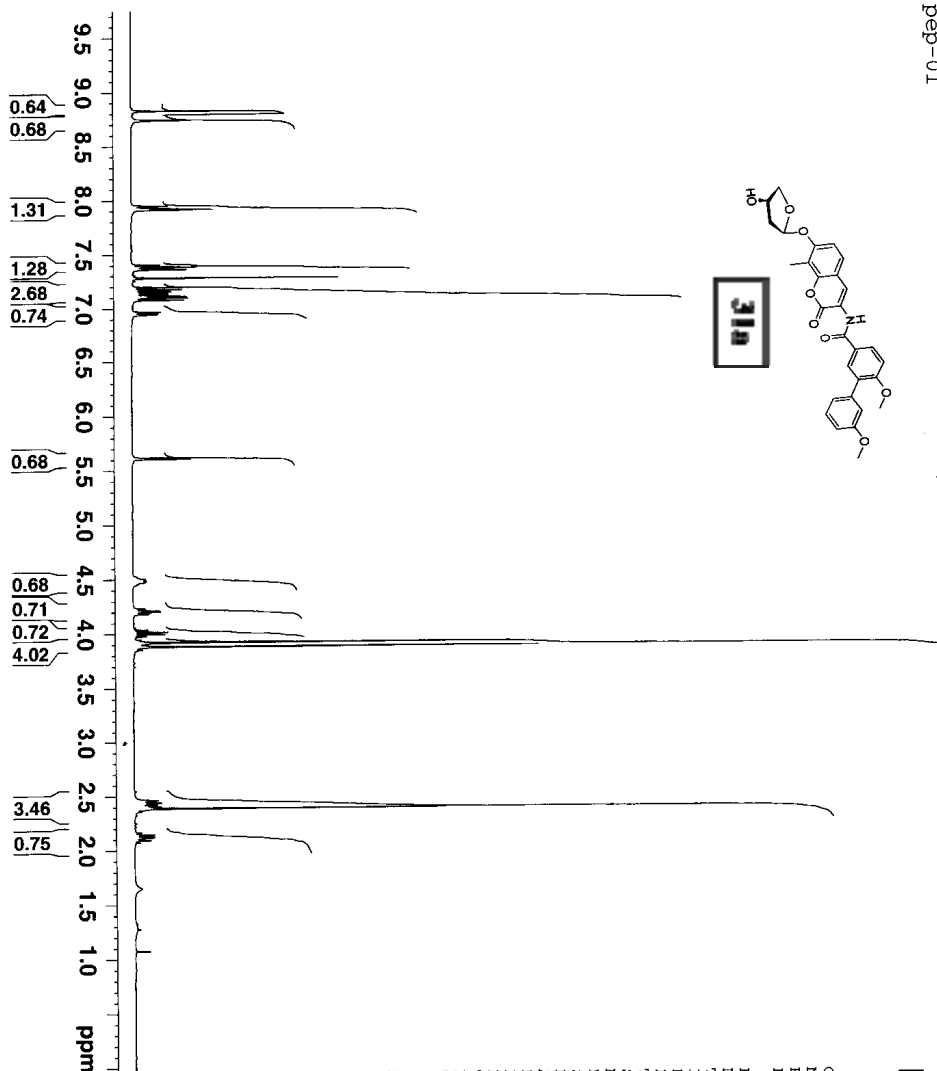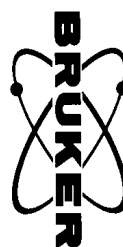

294

```

Current Data Parameters
NAME      BR-5mem-01
EXPNO     1
PROCNO    1

F2 - Acquisition Parameters
Date_     20081008
Time      17.51
INSTRUM   dx400
PROBHD    5 mm QNP 1H/13
PULPROG   zg30
TD         65536
SOLVENT   CDCl3
NS         16
DS         2
SWH        8278.146 Hz
FIDRES     0.126314 Hz
AQ          3.9584243 sec
RG          228.1
DM          60.400 usec
DE          6.00 usec
TE          284.5 K
D1          1.00000000 sec
TD0         1

===== CHANNEL f1 =====
NUC1       1H
P1         10.50 usec
PL1        -5.00 dB
SFO1       400.1324710 MHz

F2 - Processing Parameters
SI         32768
SF         400.1300000 MHz
WDW         EM
SSB         0
LB          0
GB          0
PC          1.00
    
```

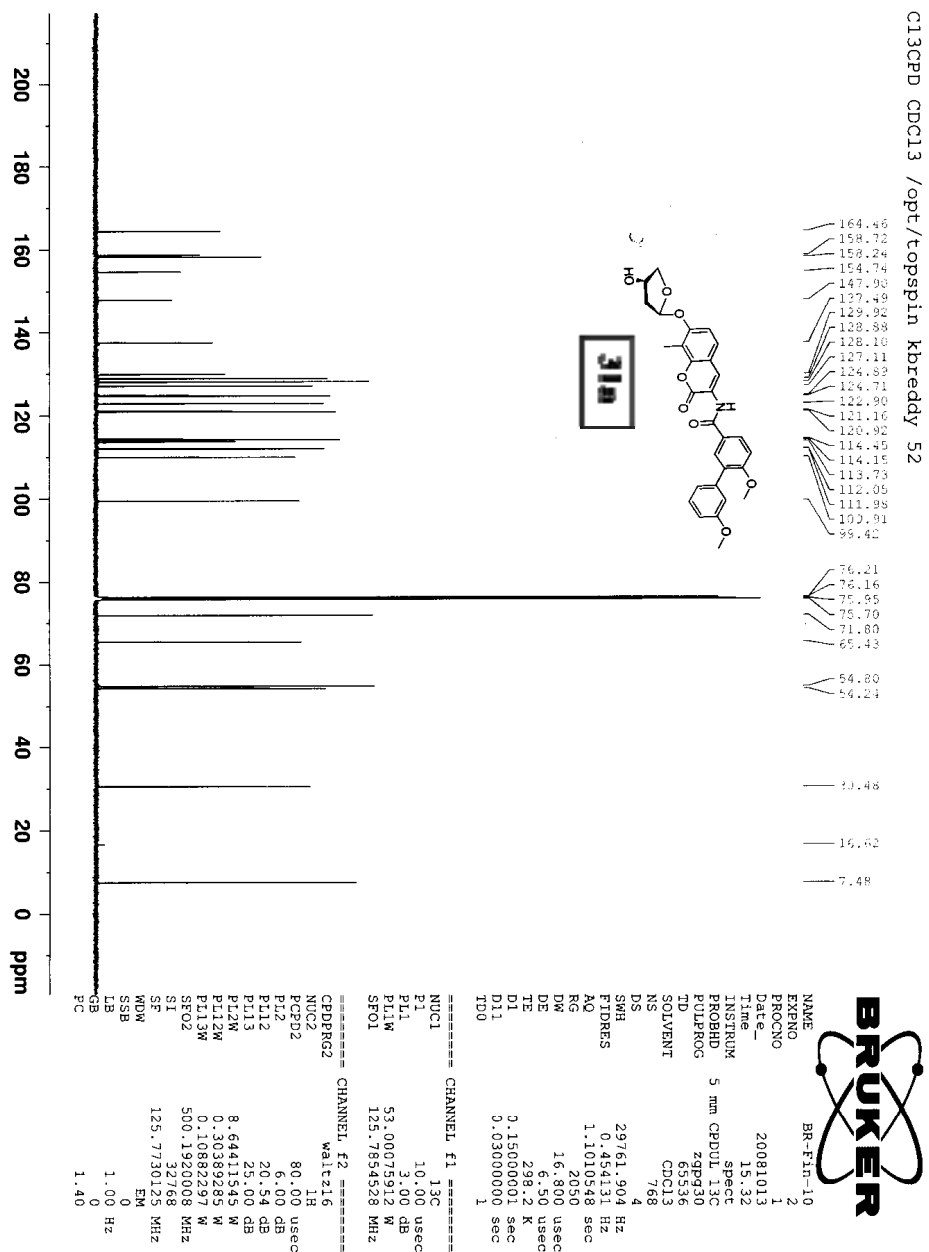

29A

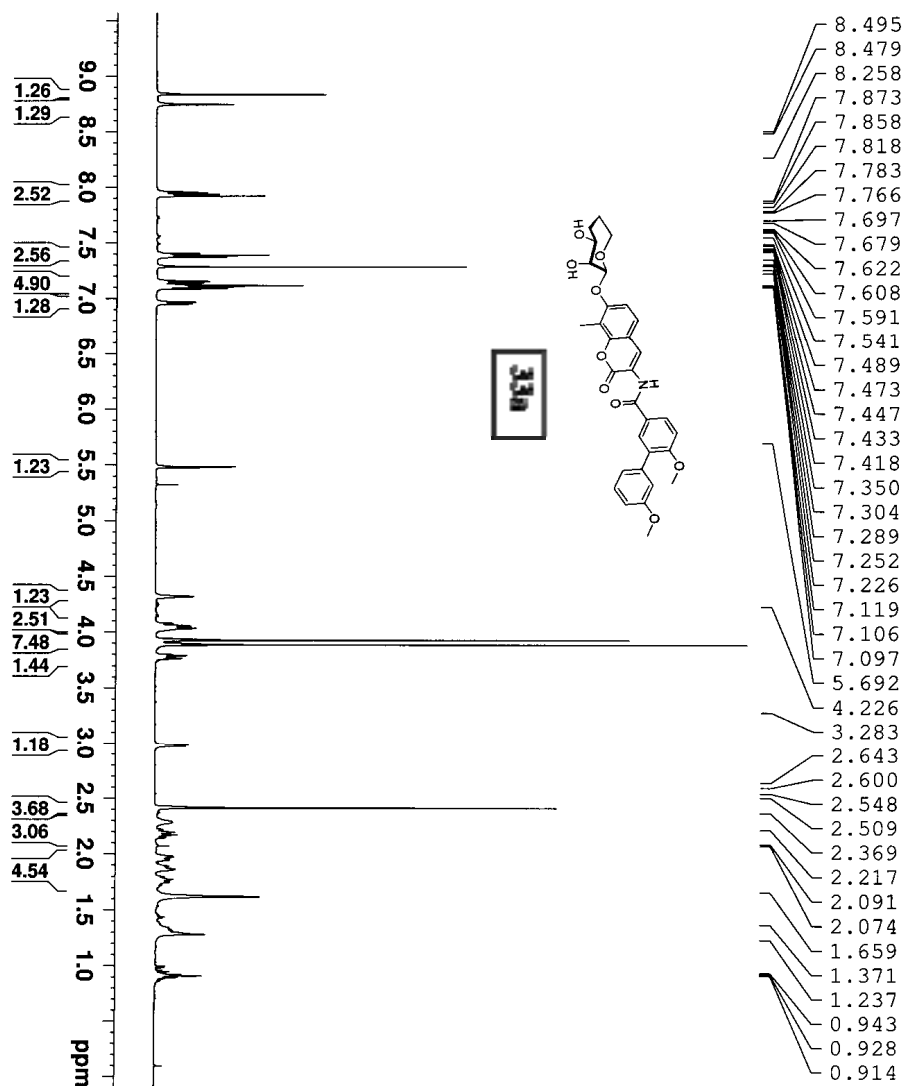

- 8.495
- 8.479
- 8.258
- 7.873
- 7.858
- 7.818
- 7.783
- 7.766
- 7.697
- 7.679
- 7.622
- 7.608
- 7.591
- 7.541
- 7.489
- 7.473
- 7.447
- 7.433
- 7.418
- 7.350
- 7.304
- 7.289
- 7.252
- 7.226
- 7.119
- 7.106
- 7.097
- 5.692
- 4.226
- 3.283
- 2.643
- 2.600
- 2.548
- 2.509
- 2.369
- 2.217
- 2.091
- 2.074
- 1.659
- 1.371
- 1.237
- 0.943
- 0.928
- 0.914

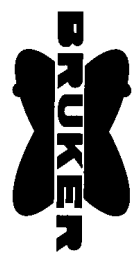

3/4

Current Data Parameters  
 NAME 223-01  
 EXPNO 2  
 PROCNO 1

F2 - Acquisition Parameters  
 Date\_ 20090506  
 Time 12.42

INSTRUM spect  
 PROBHD 5 mm BBO BB-1H  
 PULPROG zgpg30  
 TD 65536  
 SOLVENT CDCl3  
 NS 32  
 DS 2

SWH 10330.578 Hz  
 FIDRES 0.157632 Hz  
 AQ 3.1720407 sec  
 RG 456.1  
 DW 48.400 usec  
 DE 6.00 usec  
 TE 297.2 K  
 D1 1.00000000 sec  
 TDO 1

===== CHANNEL f1 =====  
 NUC1 1H  
 P1 8.60 usec  
 PL1 -3.00 dB  
 SFO1 500.1330885 MHz

F2 - Processing parameters  
 SI 32768  
 SF 500.1300000 MHz  
 WDM EM  
 SSB 0  
 LB 0.30 Hz  
 GB 0  
 PC 1.00

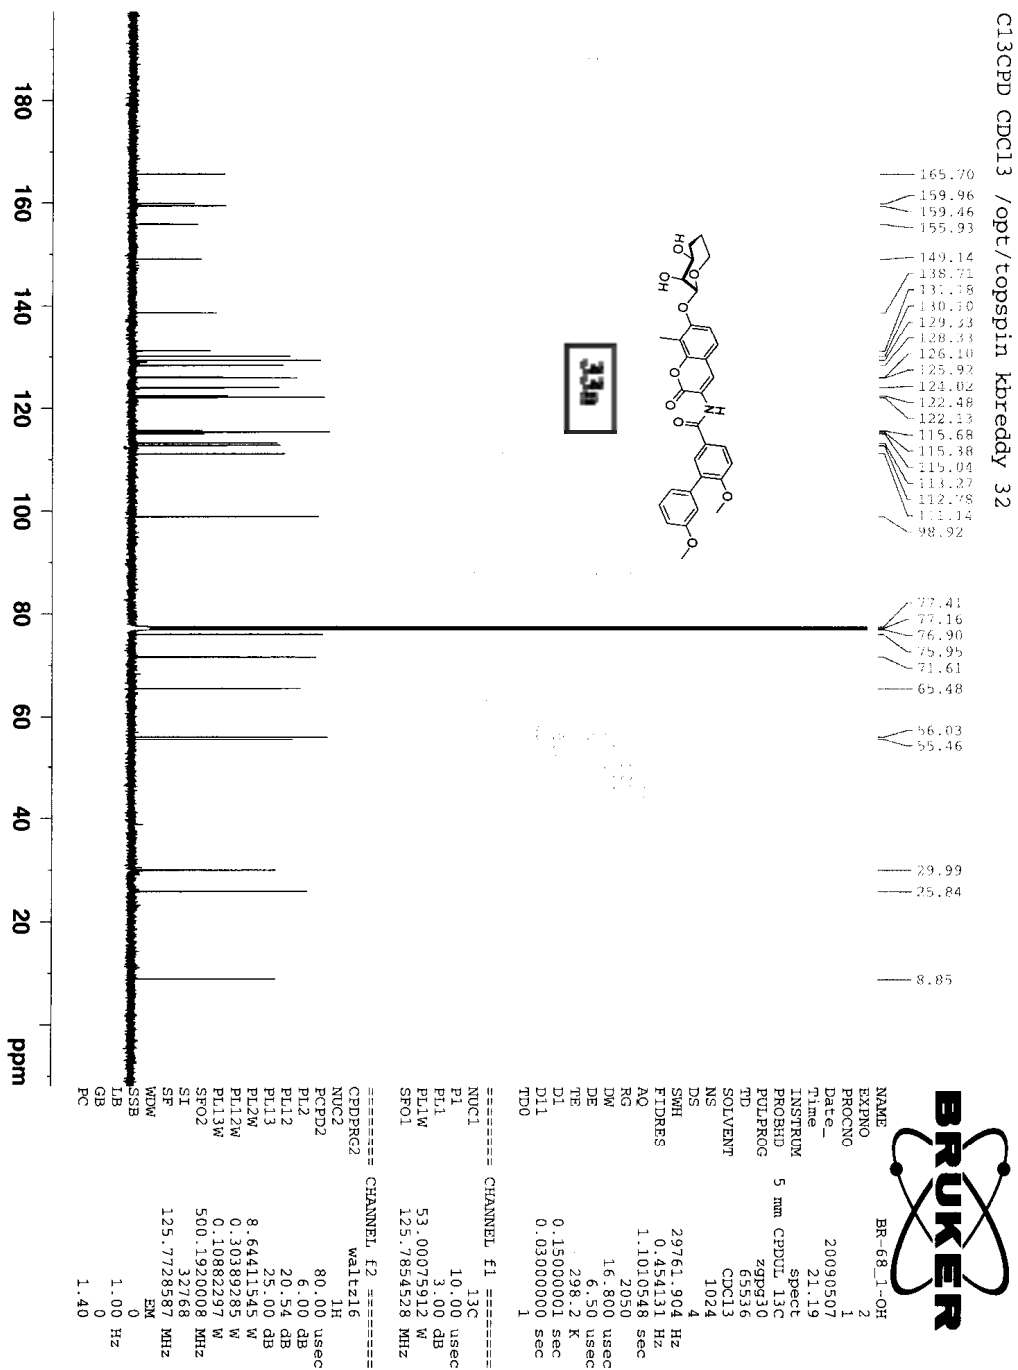



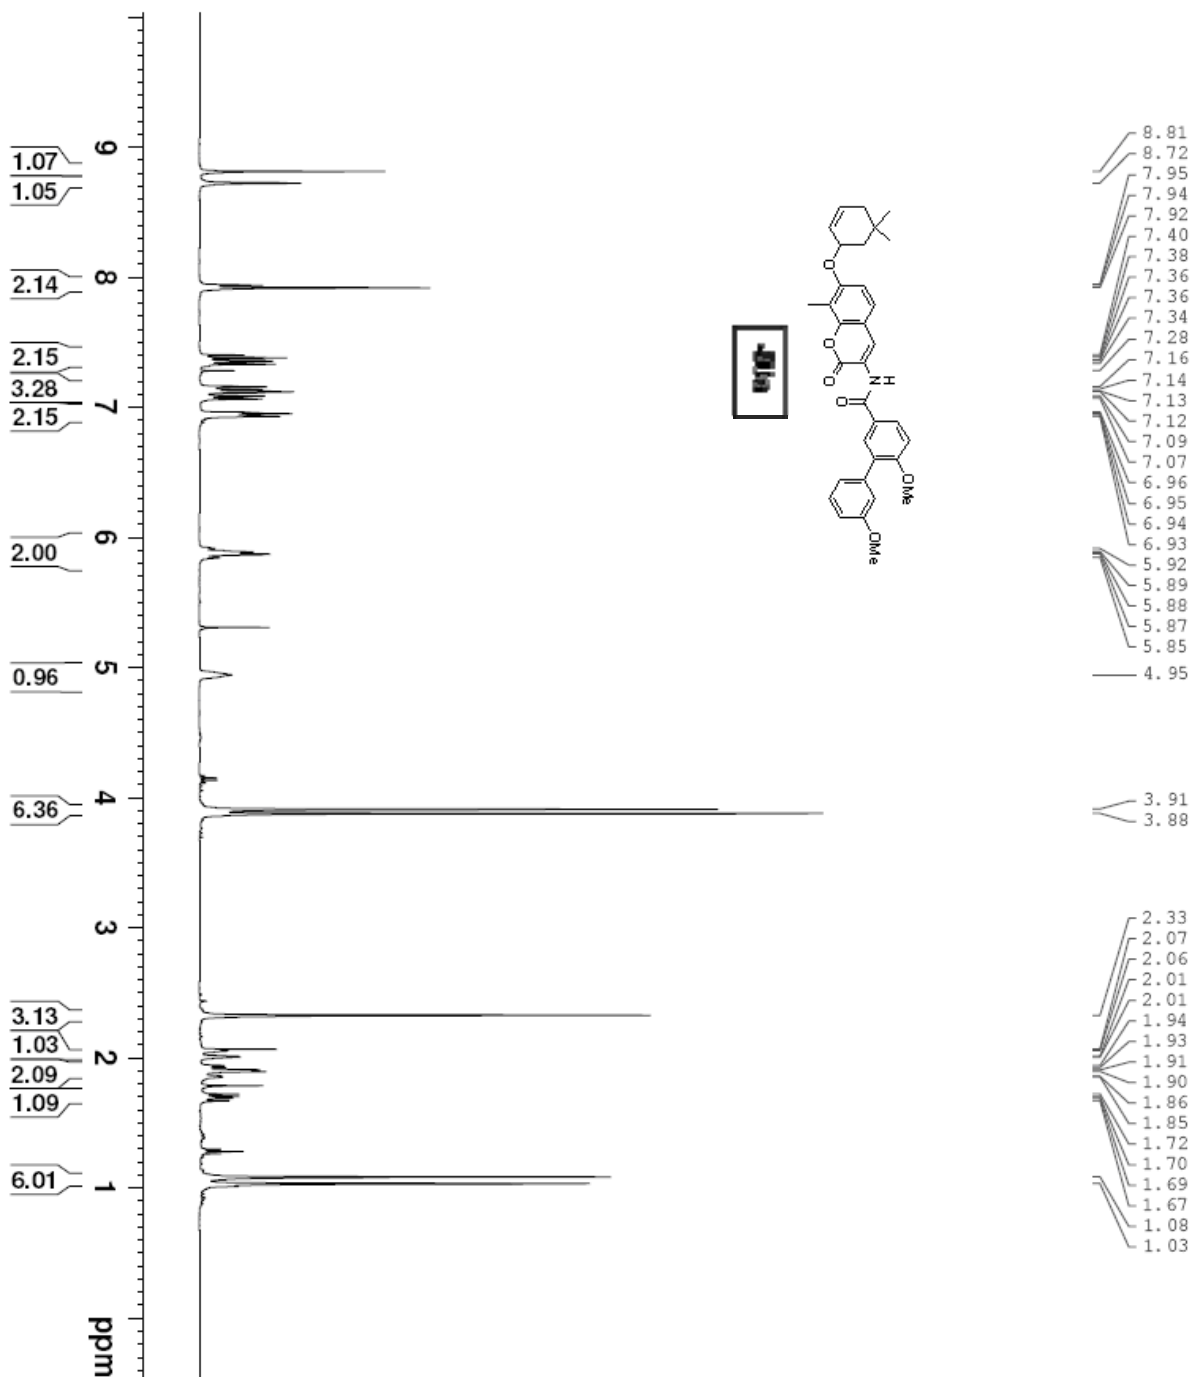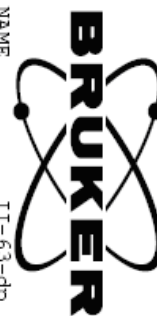

```

NAME II-63-dp
EXPNO 1
PROCNO 1
Date_ 20080908
Time 20.18
INSTRUM 5 mm QNP 1H/13
PROBHD dx400
PULPROG zg30
TD 65536
SOLVENT CDCl3
NS 16
DS 2
SWH 8278.146 Hz
FIDRES 0.126314 Hz
AQ 3.9584243 sec
RG 90.5
DW 60.400 usec
DE 6.00 usec
TE 294.1 K
D1 1.00000000 sec
TD0 1

===== CHANNEL f1 =====
NUC1 1H
P1 10.50 usec
PL1 -5.00 dB
SFO1 400.1324710 MHz
SI 32768
SF 400.1300000 MHz
WDW EM
SSB 0
LB 0.30 Hz
GB 0
PC 1.00
    
```

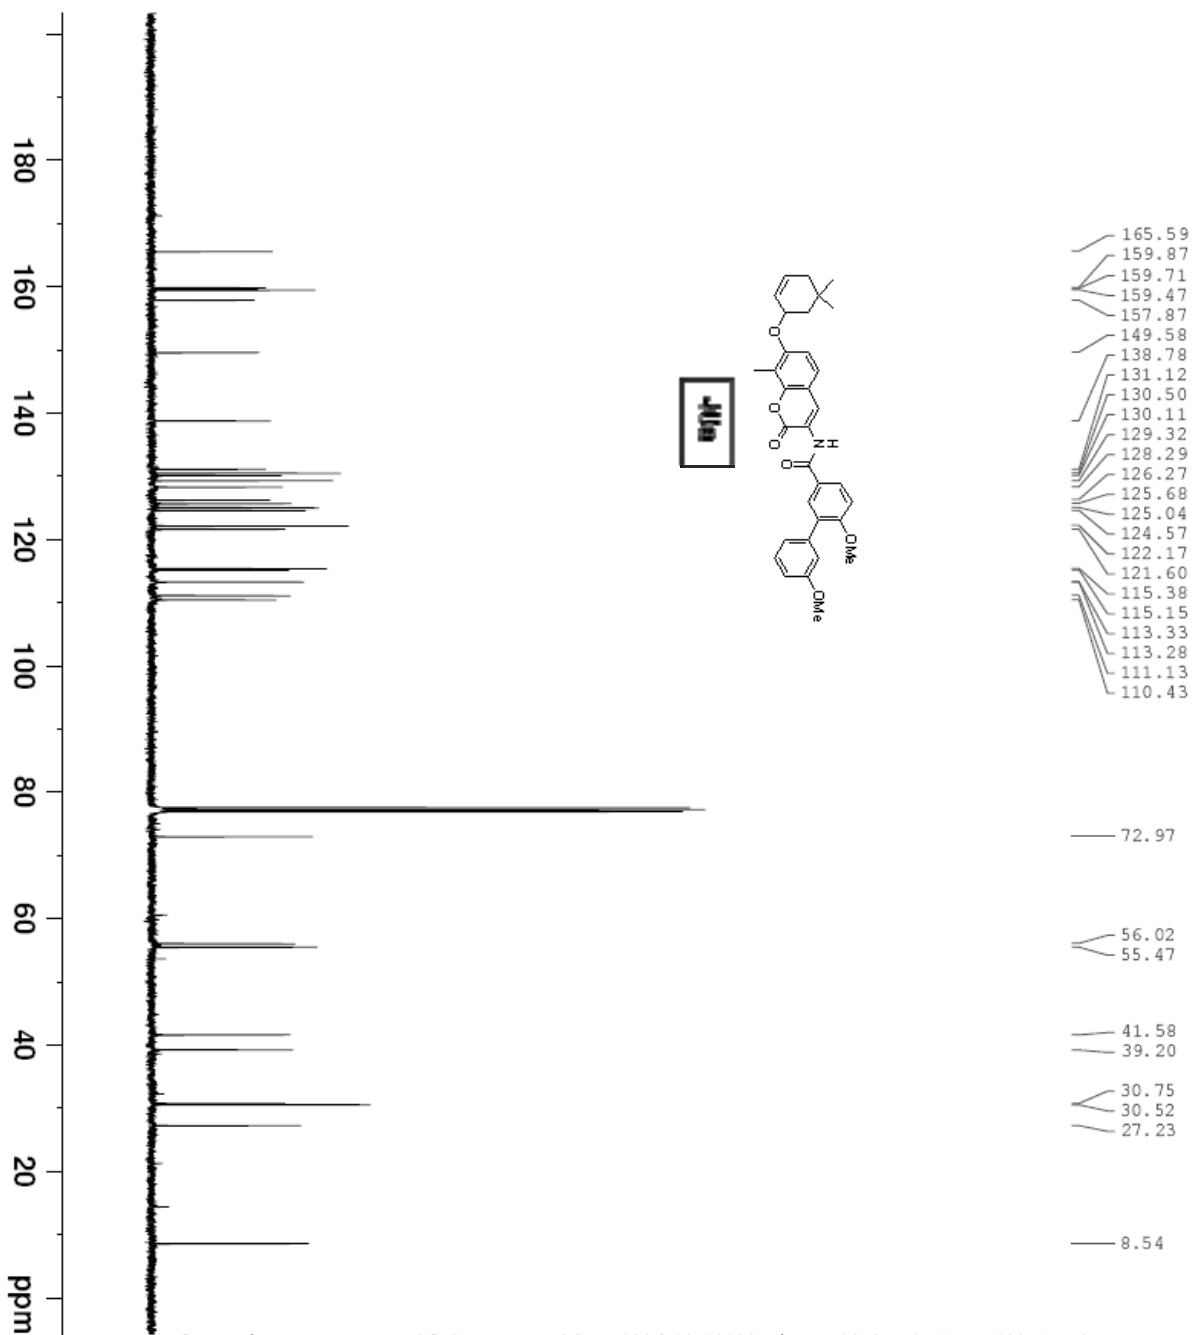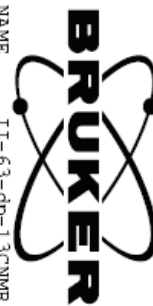

```

NAME      I1-63-dp-13CNMR
EXPNO     1
PROCNO    1
Date_     20080908
Time      20.55
INSTRUM   dx400
PROBHD    5 mm QNP 1H/13
PULPROG   zgpg30
TD         65536
SOLVENT   CDCl3
NS         512
DS         4
SWH        23980.814 Hz
FIDRES     0.363918 Hz
AQ         1.3664756 sec
RG         3251
DW         20.850 usec
DE         6.00 usec
TE         294.2 K
D1         2.00000000 sec
d11        0.03000000 sec
DELTA     1.89999998 sec
TD0        1
    
```

```

===== CHANNEL f1 =====
NUC1      13C
P1        9.85 usec
PL1       -2.00 dB
SF01     100.6228298 MHz
    
```

```

===== CHANNEL f2 =====
CPDPRG2   waltz16
NUC2      1H
PCPD2     100.00 usec
PL2       -5.00 dB
PL12     14.58 dB
PL13     16.00 dB
SF02     400.1316005 MHz
SI        32768
SE        100.6127550 MHz
WDW       EM
SSB       0
LB        1.00 Hz
GB         0
PC        1.40
    
```

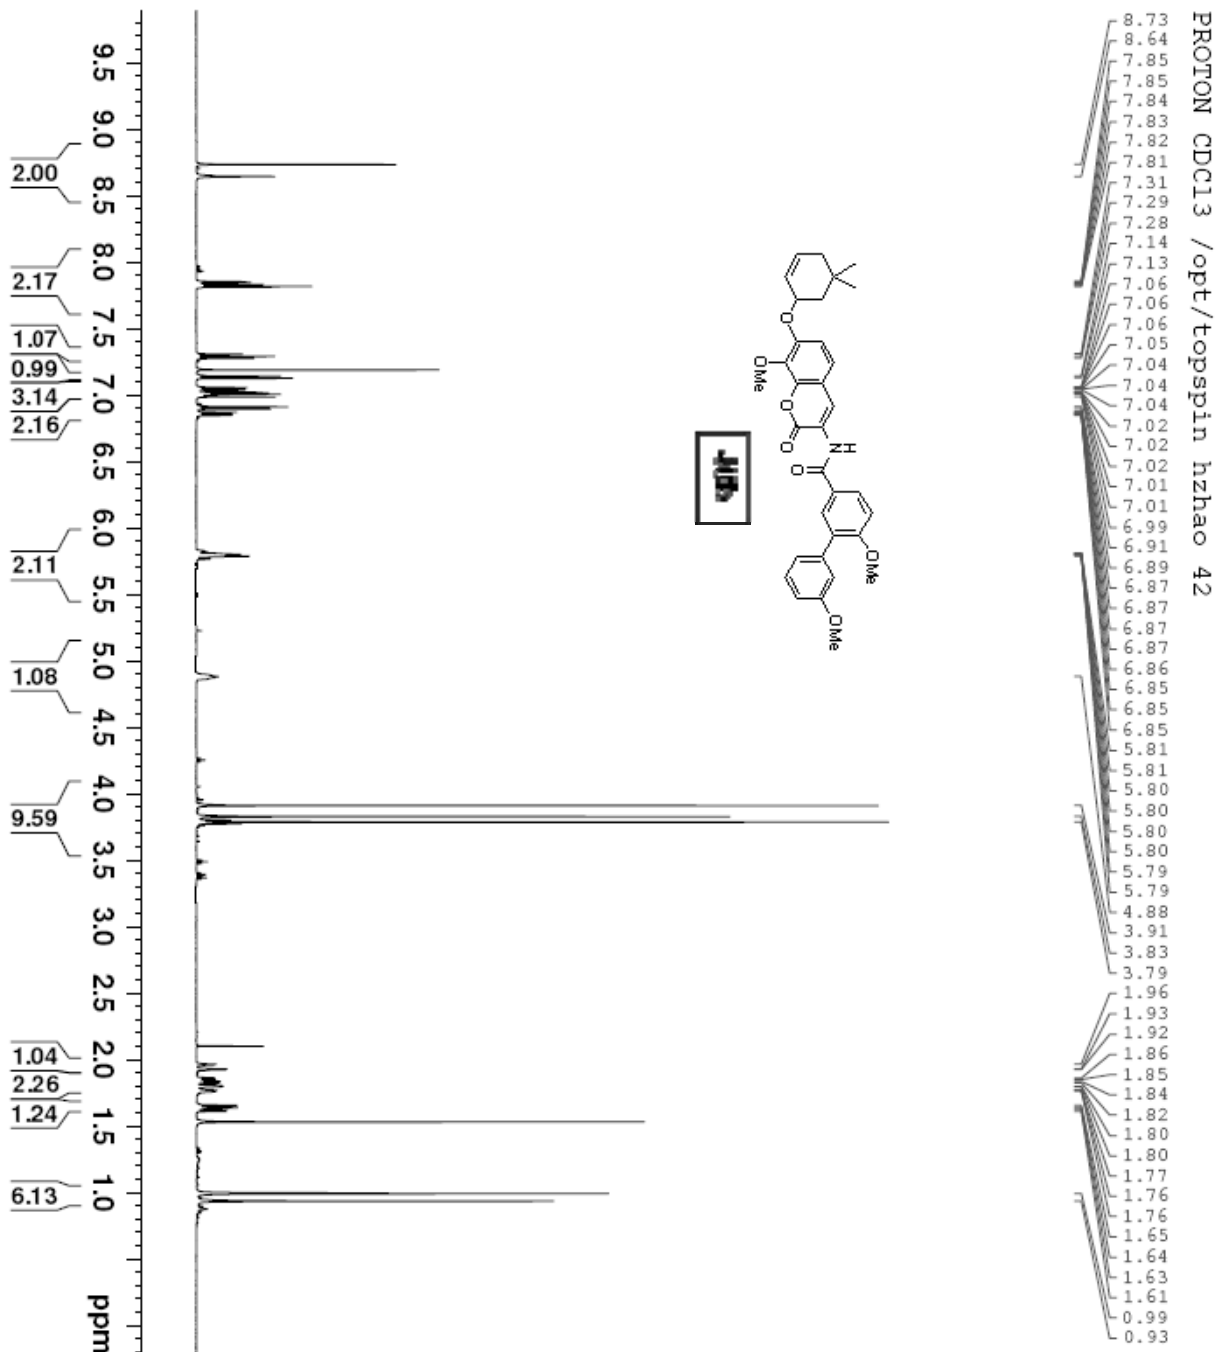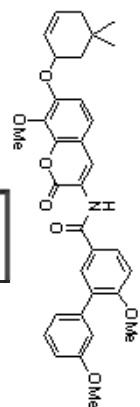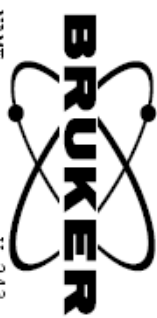

```

NAME V-243
EXPNO 1
PROCNO 1
Date_ 20090508
Time 4.23
INSTRUM spect
PROBHD 5 mm CPDUL 13C
PULPROG zg30
ID 65536
SOLVENT CDCl3
NS 16
DS 2
SWE 10330.578 HZ
FIDRES 0.157632 HZ
AQ 3.171923 sec
RG 2050
DW 48.400 usec
DE 6.50 usec
TE 298.2 K
D1 1.00000000 sec
ID0 1

===== CHANNEL f1 =====
NUC1 1H
P1 15.00 usec
PL1 6.00 dB
PL1W 8.64411545 W
SFO1 500.1930889 MHz
SI 32768
SF 500.1900400 MHz
WDW EM
SSB 0
LB 0.30 HZ
GB 0
PC 1.00
    
```

PROTON CDCl3 /opt/topspin hzhao 42

8.73  
8.64  
7.85  
7.85  
7.84  
7.83  
7.82  
7.81  
7.31  
7.29  
7.28  
7.14  
7.13  
7.06  
7.06  
7.05  
7.04  
7.04  
7.04  
7.02  
7.02  
7.02  
7.01  
7.01  
6.99  
6.91  
6.89  
6.87  
6.87  
6.87  
6.86  
6.85  
6.85  
6.85  
5.81  
5.81  
5.80  
5.80  
5.80  
5.79  
5.79  
4.88  
3.91  
3.83  
3.79  
1.96  
1.93  
1.92  
1.86  
1.85  
1.84  
1.82  
1.80  
1.80  
1.77  
1.76  
1.76  
1.65  
1.64  
1.63  
1.61  
0.99  
0.93

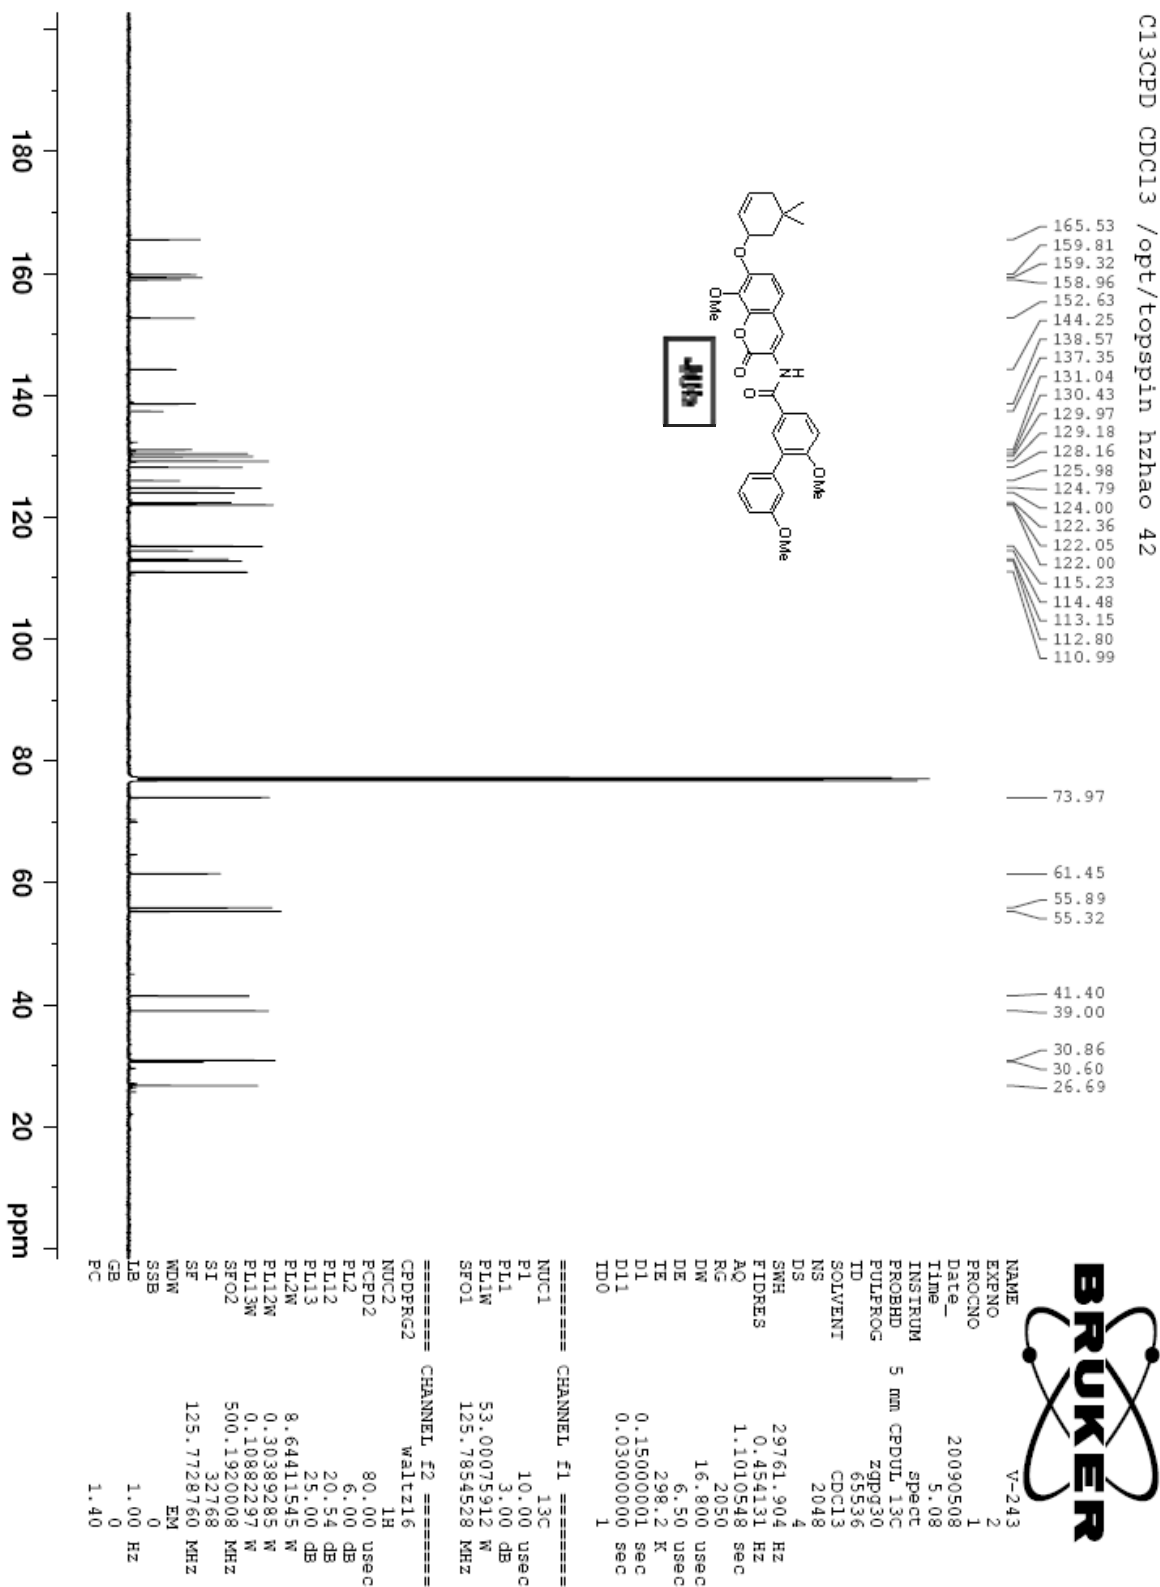

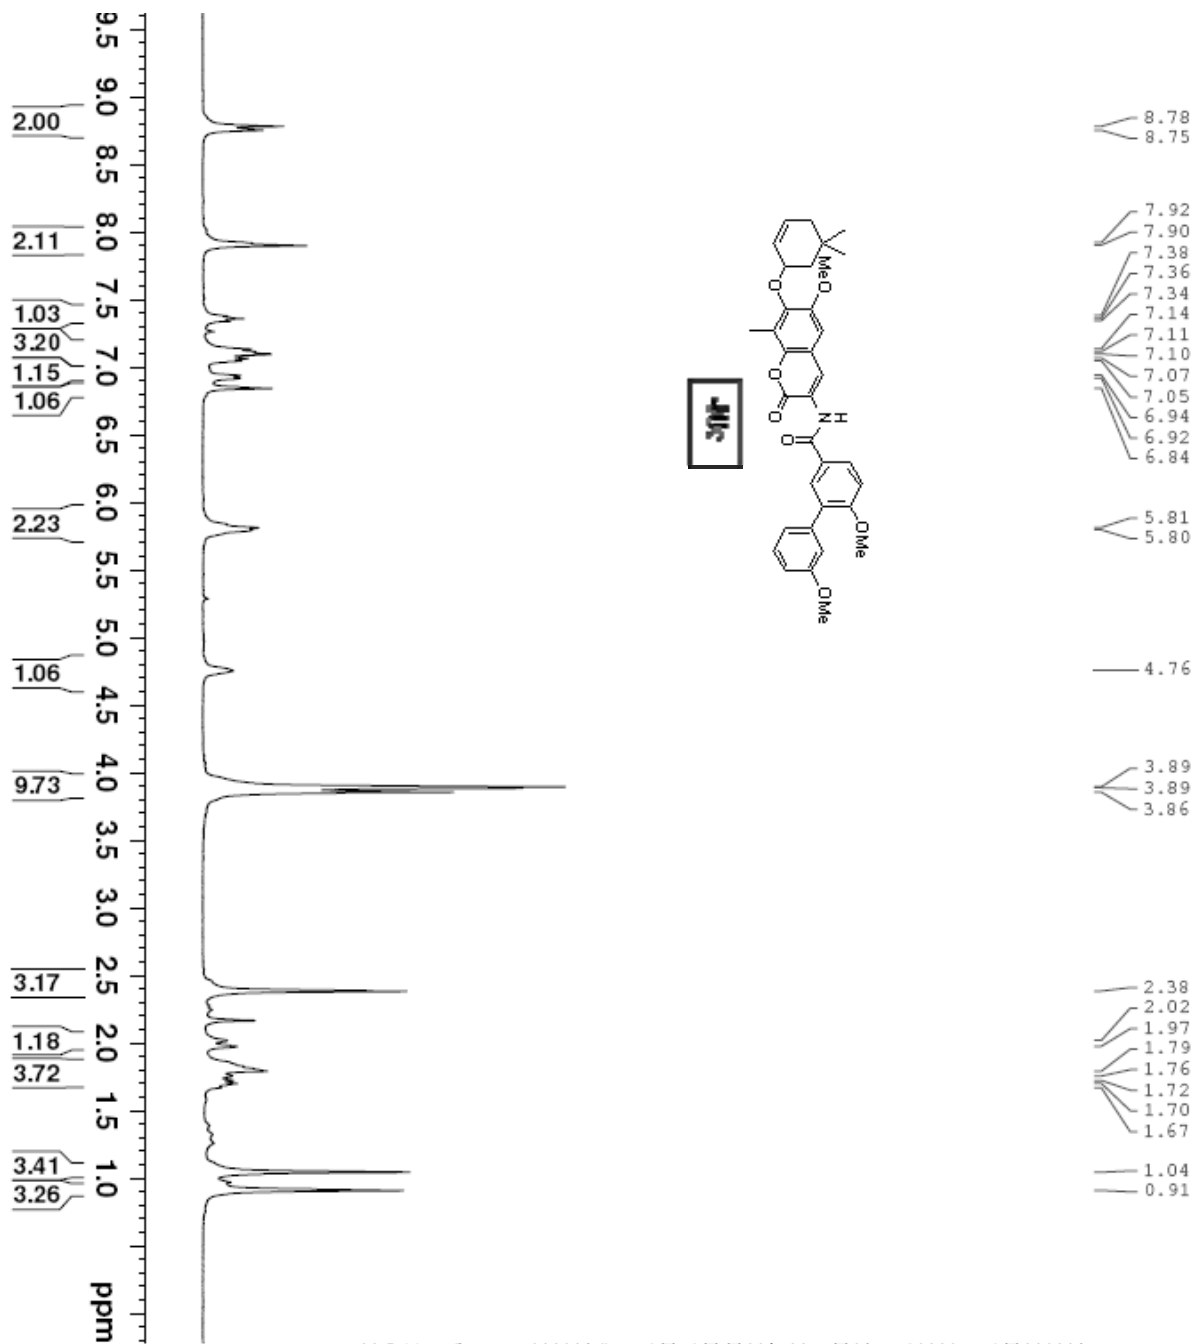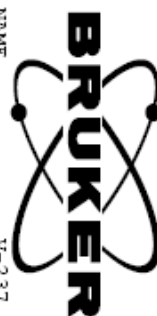

```

NAME V-237
EXPNO 1
PROCNO 1
Date_ 20090506
Time 11.56
INSTRUM drx400
PROBHD 5 mm QNP 1H/13
PULPROG zg30
TD 65536
SOLVENT CDCl3
NS 8
DS 2
SWH 8278.146 Hz
FIDRES 0.126314 Hz
AQ 3.9584243 sec
RG 4
DE 60.400 usec
TE 294.5 K
D1 1.00000000 sec
ID0 1

===== CHANNEL f1 =====
NUC1 1H
P1 10.50 usec
PL1 -5.00 dB
SFO1 400.1324710 MHz
SI 32768
SF 400.1300078 MHz
WDW EM
SSB 0
LB 0.30 Hz
GB 0
PC 1.00
    
```

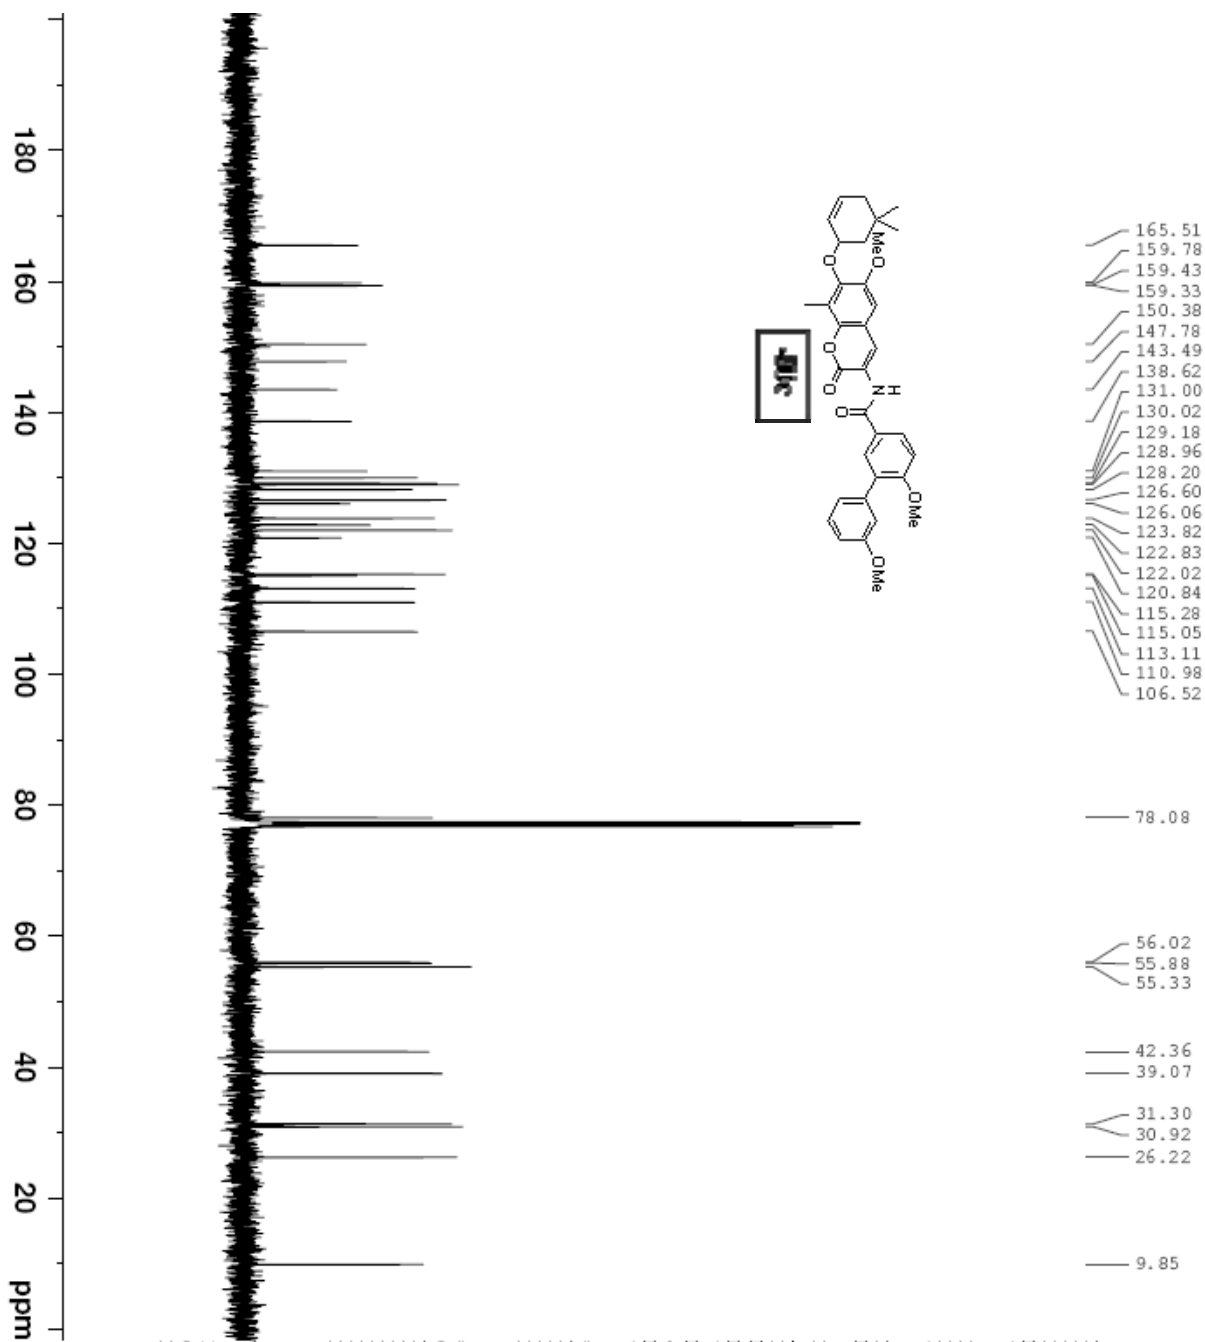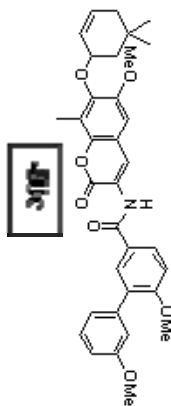

BRUKER

V-237-13CNMR

```

NAME
EXPNO 1
PROCNO 1
Date_ 20090506
Time 12.18
INSTRUM dxs400
PROBHD 5 mm QNP 1H/13
PULPROG zgpg30
ID zgpg30
SOLVENT CDCl3
NS 129
DS 4
SWH 23980.814 Hz
FIDRES 0.365918 Hz
AQ 1.3664756 sec
RG 32768
DW 20.850 usec
DE 6.00 usec
TE 294.6 K
D1 2.00000000 sec
d11 0.03000000 sec
DELTA 1.89999998 sec
ID0 2

===== CHANNEL f1 =====
NUC1 13C
P1 9.85 usec
PL1 -2.00 dB
SFO1 100.6228298 MHz

===== CHANNEL f2 =====
CPDPRG2 waltz16
NUC2 1H
PCPD2 100.00 usec
PL2 -5.00 dB
PL12 14.58 dB
PL13 16.00 dB
SFO2 400.1316005 MHz
SI 32768
SF 100.6127690 MHz
WDW EM
SSB 0
LB 1.00 Hz
GB 0
PC 1.40
    
```

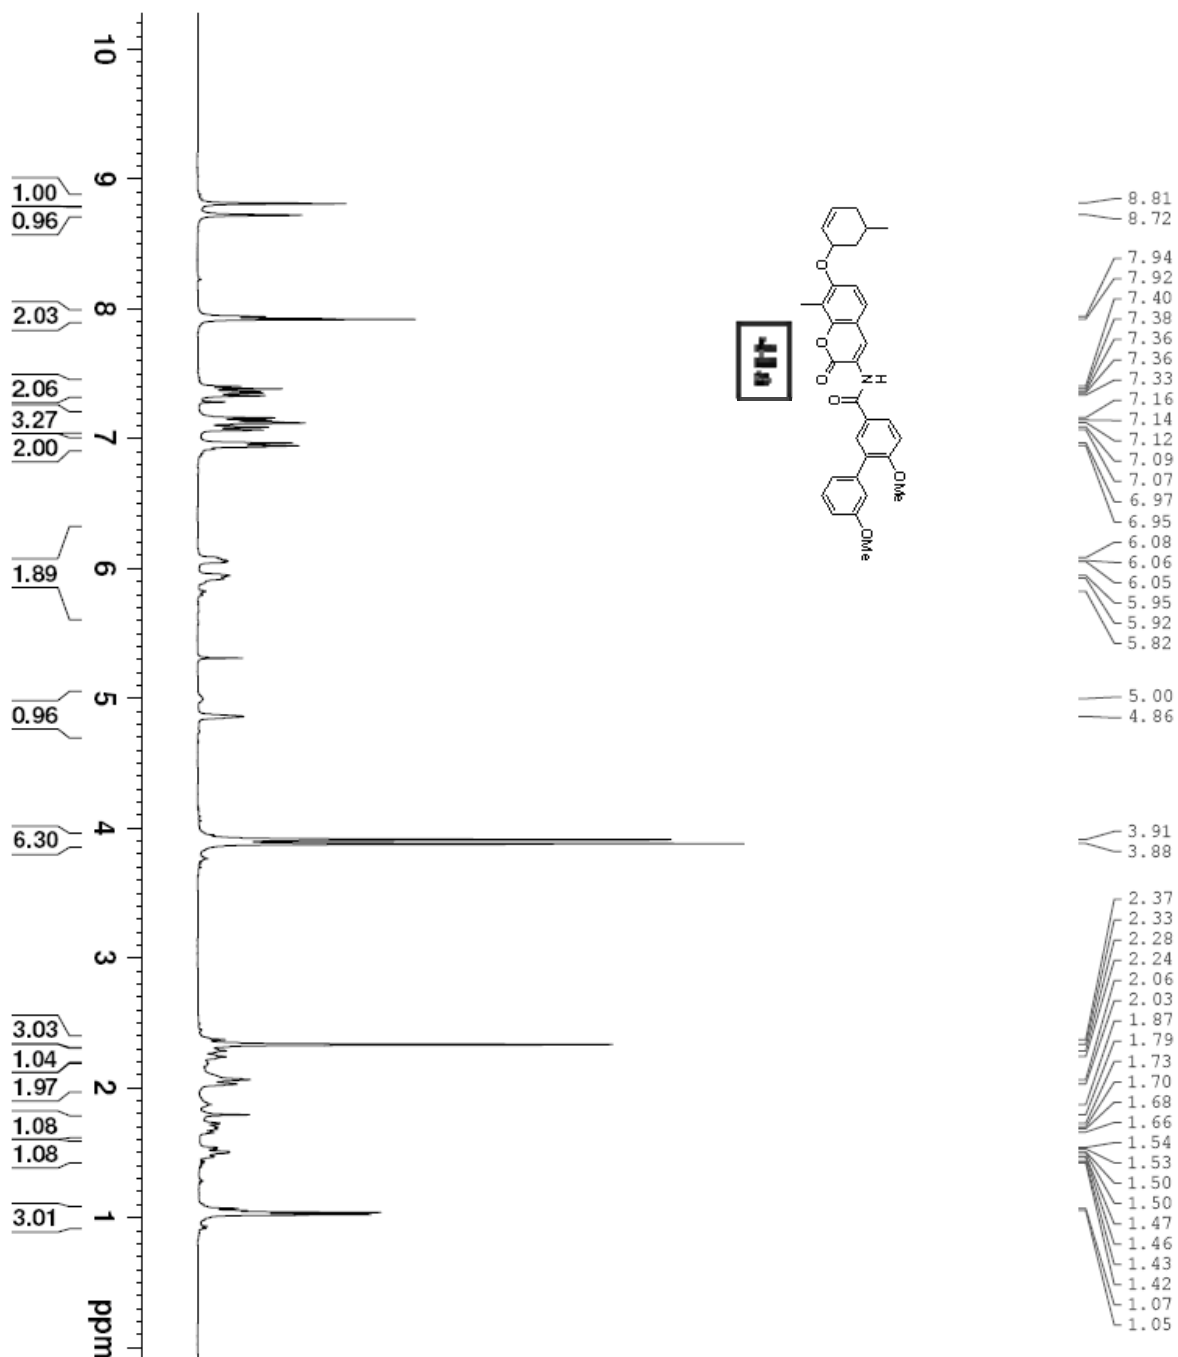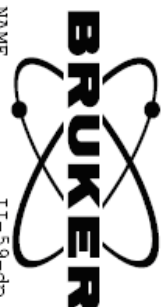

```

NAME      II-59-dp
EXPNO     1
PROCNO    1
Date_     20080908
Time      21.04
INSTRUM   dxr400
PROBHD    5 mm QNP 1H/13
PULPROG   zg30
TD         65536
SOLVENT   CDCl3
NS         16
DS         2
SWH        8278.146 Hz
FIDRES     0.126314 Hz
AQ         3.9584243 sec
RG         80.6
DW         60.400 usec
DE         6.00 usec
TE         294.1 K
D1         1.00000000 sec
TD0        1

===== CHANNEL f1 =====
NUC1      1H
P1        10.50 usec
PL1       -5.00 dB
SFO1      400.1324710 MHz
SI        32768
SF        400.1300000 MHz
WDW       EM
SSB       0
LB        0.30 Hz
GB        0
PC        1.00
    
```

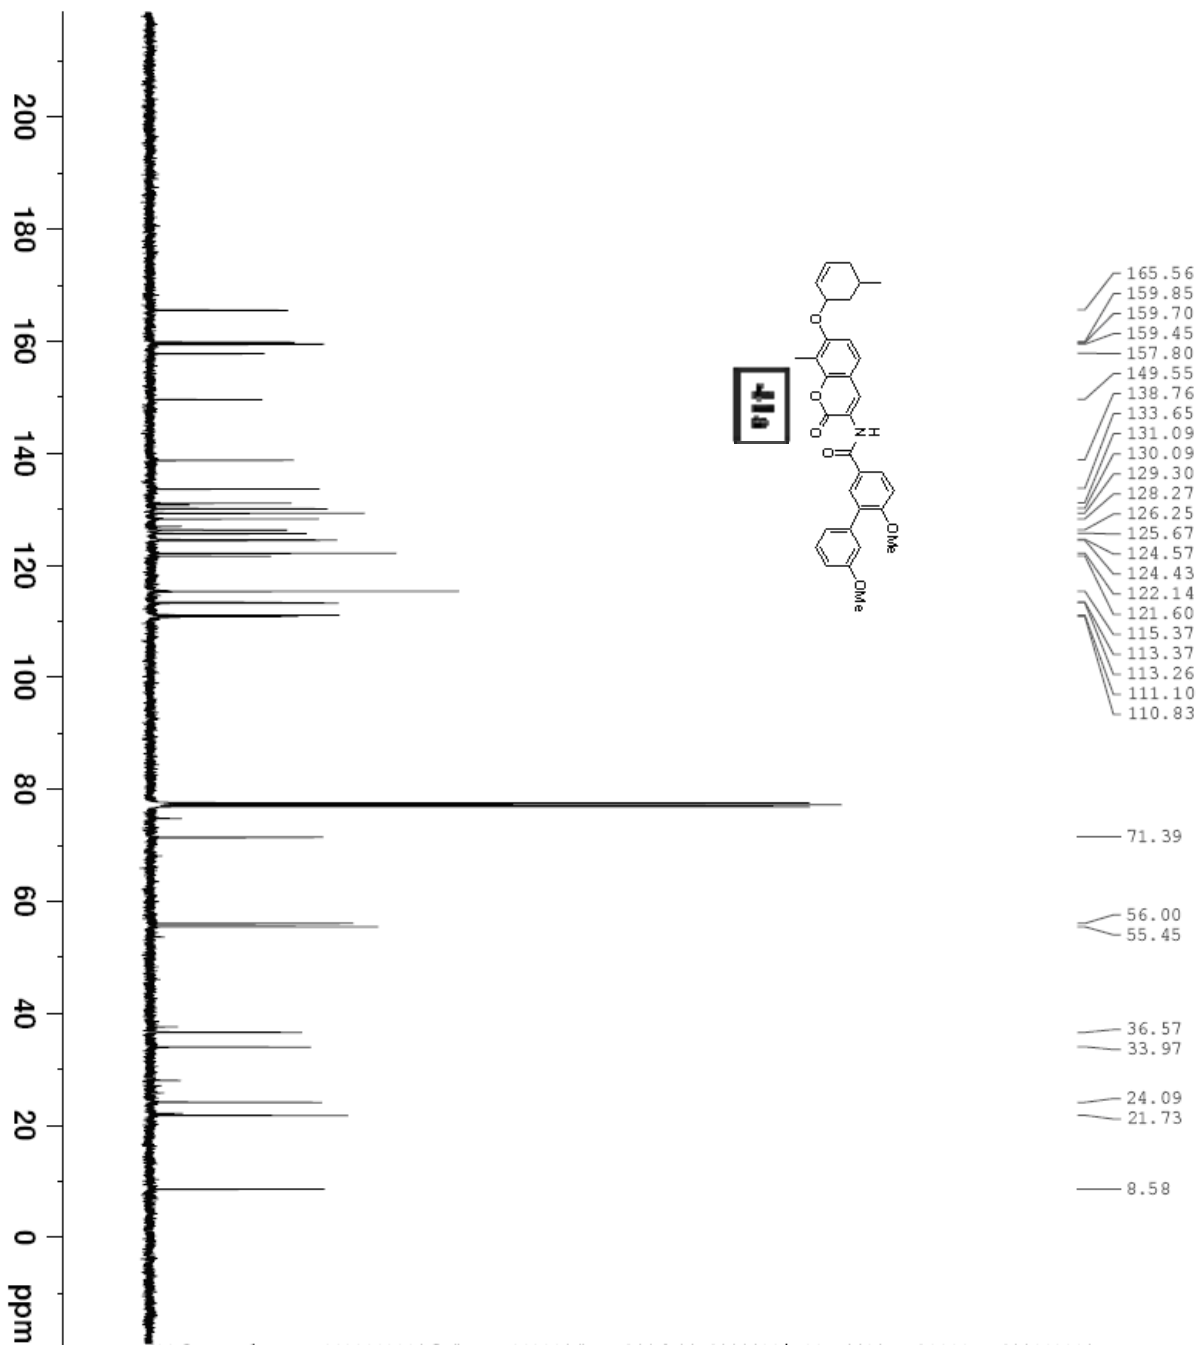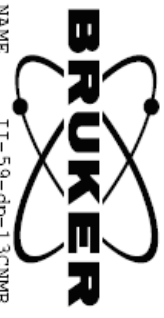

```

NAME IT-59-dp-13CNMR
EXPNO 1
PROCNO 1
Date_ 20080908
Time_ 21.39
INSTRUM dirx400
PROBHD 5 mm QNP 1H/13
PULPROG zgpg30
TD 65536
SOLVENT CDCl3
NS 512
DS 4
SWH 23980.814 Hz
FIDRES 0.365918 Hz
AQ 1.3664756 sec
RG 2896.3
DW 20.850 usec
DE 6.00 usec
TE 294.3 K
D1 2.00000000 sec
d11 0.03000000 sec
DELTA 1.89999998 sec
TD0 1

===== CHANNEL f1 =====
NUC1 13C
P1 9.85 usec
PL1 -2.00 dB
SFO1 100.6228298 MHz

===== CHANNEL f2 =====
CPDPRG2 waltz16
NUC2 1H
PCPD2 100.00 usec
PL2 -3.00 dB
PL12 14.58 dB
PL13 16.00 dB
SFO2 400.1316005 MHz
SI 32768
SF 100.6127569 MHz
WDW EM
SSB 0
LB 1.00 Hz
GB 0
PC 1.40
    
```



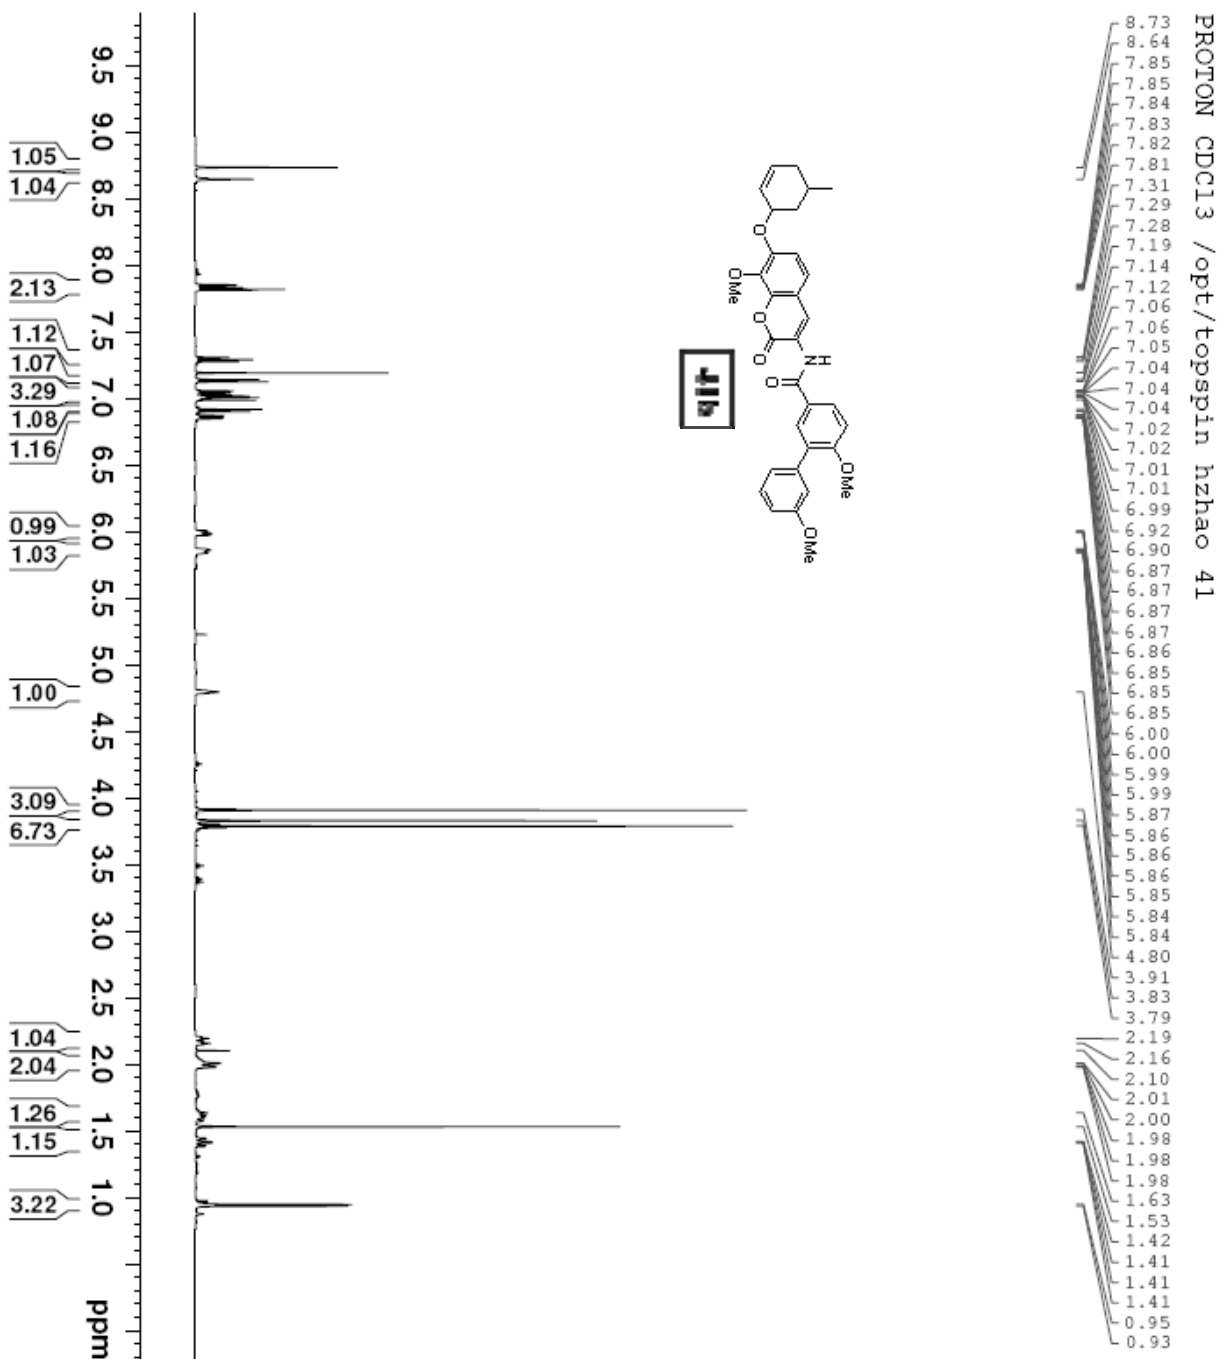

PROTON CDCl3 /opt/topspin hzhao 41

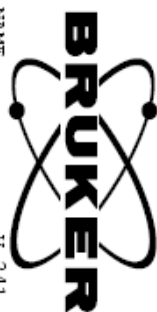

```

NAME V-241
EXPNO 1
PROCNO 1
Date_ 20090508
Time_ 3.34
INSTRUM spect
PROBHD 5 mm CPDUL 13C
PULPROG zg30
TD 65536
SOLVENT CDCl3
NS 16
DS 2
SWH 10330.578 Hz
FIDRES 0.157632 Hz
AQ 3.1719923 sec
RG 2050
DW 48.400 usec
DE 6.50 usec
TE 298.2 K
D1 1.00000000 sec
ID0 1
    
```

```

===== CHANNEL f1 =====
NUC1 1H
P1 15.00 usec
PL1 6.00 dB
PL1W 8.6441545 W
SFO1 500.1930889 MHz
SI 32768
SF 500.1900399 MHz
WDW EM
SSB 0
LB 0.30 Hz
GB 0
PC 1.00
    
```

C13CPD CDCl3 /opt/topspin hzhao 41

165.53  
159.81  
159.32  
158.98  
152.56  
144.23  
138.57  
137.57  
133.80  
131.04  
129.97  
129.18  
128.16  
125.98  
124.14  
124.02  
122.37  
122.05  
122.00  
115.23  
114.54  
113.24  
113.15  
110.99

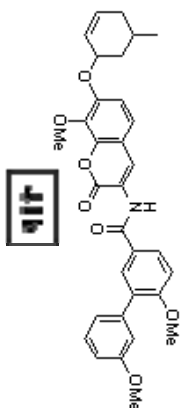

72.18  
61.46  
55.89  
55.32  
36.29  
33.81  
23.87  
21.54

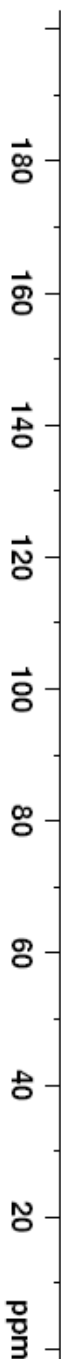

BRUKER

NAME V-241  
EXPNO 2  
PROCNO 1  
Date\_ 20090508  
Time 4.19  
INSTRUM spect  
PROBHD 5 mm CPDUL 13C  
PULPROG zgpg30  
TD 65536  
SOLVENT CDCl3  
NS 2048  
DS 4  
SWH 29761.904 HZ  
FIDRES 0.454131 HZ  
AQ 1.1010548 sec  
RG 2050  
DW 16.800 usec  
DE 6.50 usec  
TE 298.2 K  
D1 0.15000001 sec  
D11 0.03000000 sec  
ID0 1

==== CHANNEL F1 =====  
NUC1 13C  
P1 10.00 usec  
PL1 3.00 dB  
PL1W 53.00075912 W  
SFO1 125.7854528 MHZ

==== CHANNEL F2 =====  
CPDPRG2 waltz16  
NUC2 1H  
PCPD2 80.00 usec  
PL2 6.00 dB  
PL12 20.54 dB  
PL13 25.00 dB  
PL2W 8.64411545 W  
PL12W 0.30389285 W  
PL13W 0.10882297 W  
SFO2 500.1920008 MHZ  
SI 32768  
SF 125.7728760 MHZ  
WDW EM  
SSB 0  
LB 1.00 HZ  
GB 0  
PC 1.40

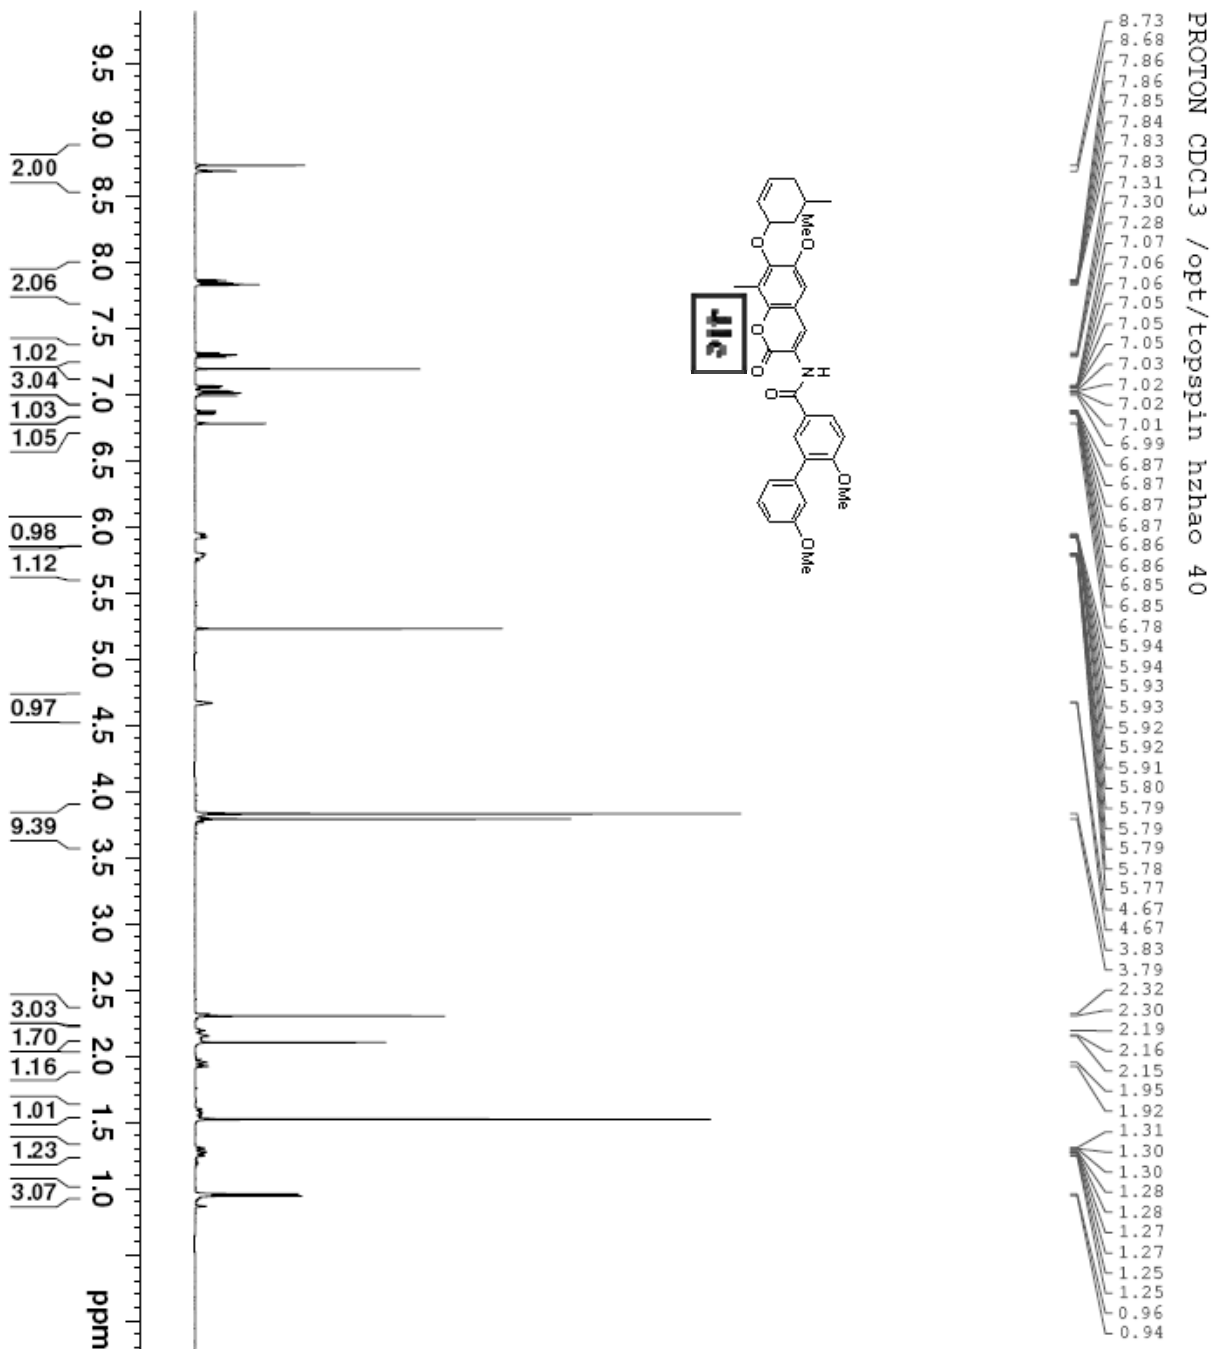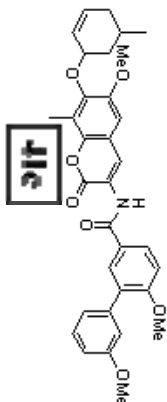

```

NAME V-235
EXPNO 1
PROCNO 1
Date_ 20090508
Time 2.45
INSTRUM spect
PROBHD 5 mm CPDUL 13C
PULPROG zg30
ID 65536
SOLVENT CDCl3
NS 16
DS 2
SWH 10330.578 Hz
FIDRES 0.157632 Hz
AQ 3.1719923 sec
RG 2050
DW 48.400 usec
DE 6.50 usec
TE 298.2 K
D1 1.00000000 sec
TD0 1

===== CHANNEL f1 =====
NUC1 1H
P1 15.00 usec
PL1 6.00 dB
PL1W 8.64411545 W
SFO1 500.1930889 MHz
SI 32768
SF 500.1900395 MHz
WDW EM
SSB 0
LB 0.30 Hz
GB 0
PC 1.00
    
```

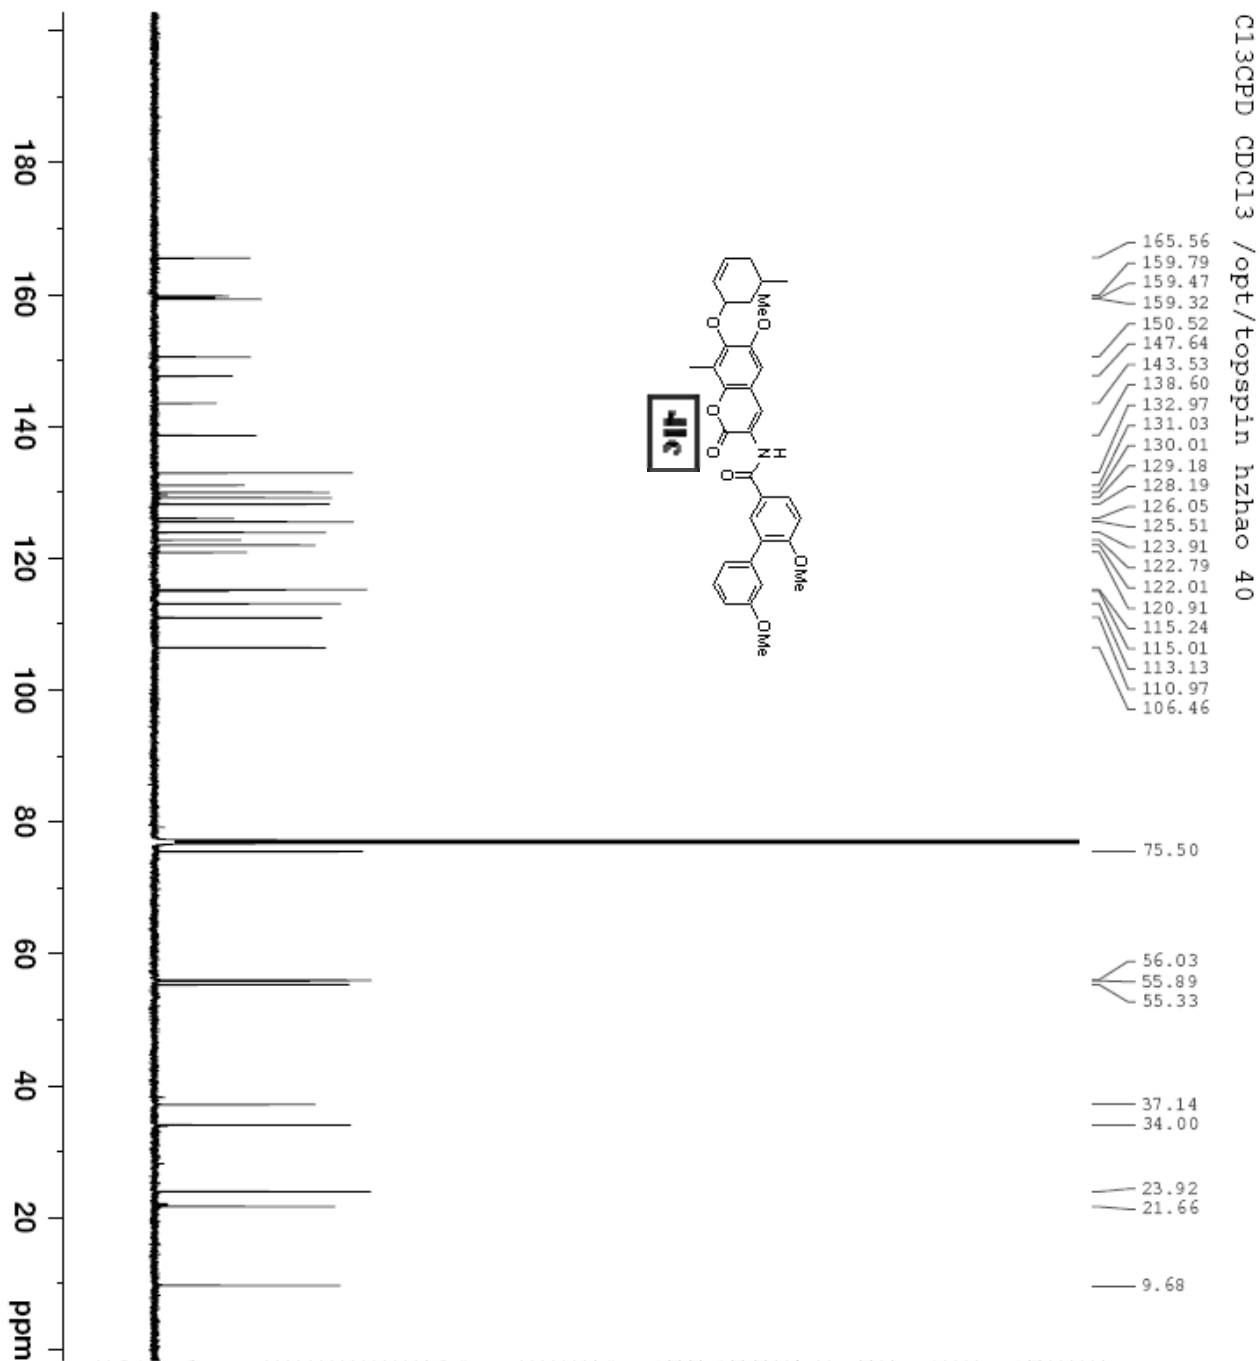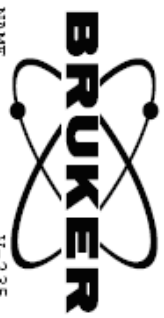

```

NAME V-235
EXPNO 2
PROCNO 1
Date_ 20090508
Time 3.30
INSTRUM spect
PROBHD 5 mm CPDUL 13C
PULPROG zgpg30
TD 65536
SOLVENT CDCl3
NS 2048
DS 4
SWH 29761.904 HZ
FIDRES 0.454131 HZ
AQ 1.1010548 sec
RG 2050
DW 16.800 usec
DE 6.50 usec
TE 298.2 K
D1 0.15000001 sec
D11 0.030000000 sec
TD0 1

===== CHANNEL f1 =====
NUC1 13C
P1 10.00 usec
PL1 3.00 dB
PL1W 53.00075912 W
SFO1 125.7854528 MHZ

===== CHANNEL f2 =====
CPDPRG2 waltz16
NUC2 1H
PCPD2 80.00 usec
PL2 6.00 dB
PL12 20.54 dB
PL13 25.00 dB
PL2W 8.64411545 W
PL12W 0.30389285 W
PL13W 0.10882297 W
SFO2 500.1920008 MHZ
SI 32768
SF 125.7728760 MHZ
WDW EM
SSB 0
GB 1.00 HZ
PC 1.40
    
```

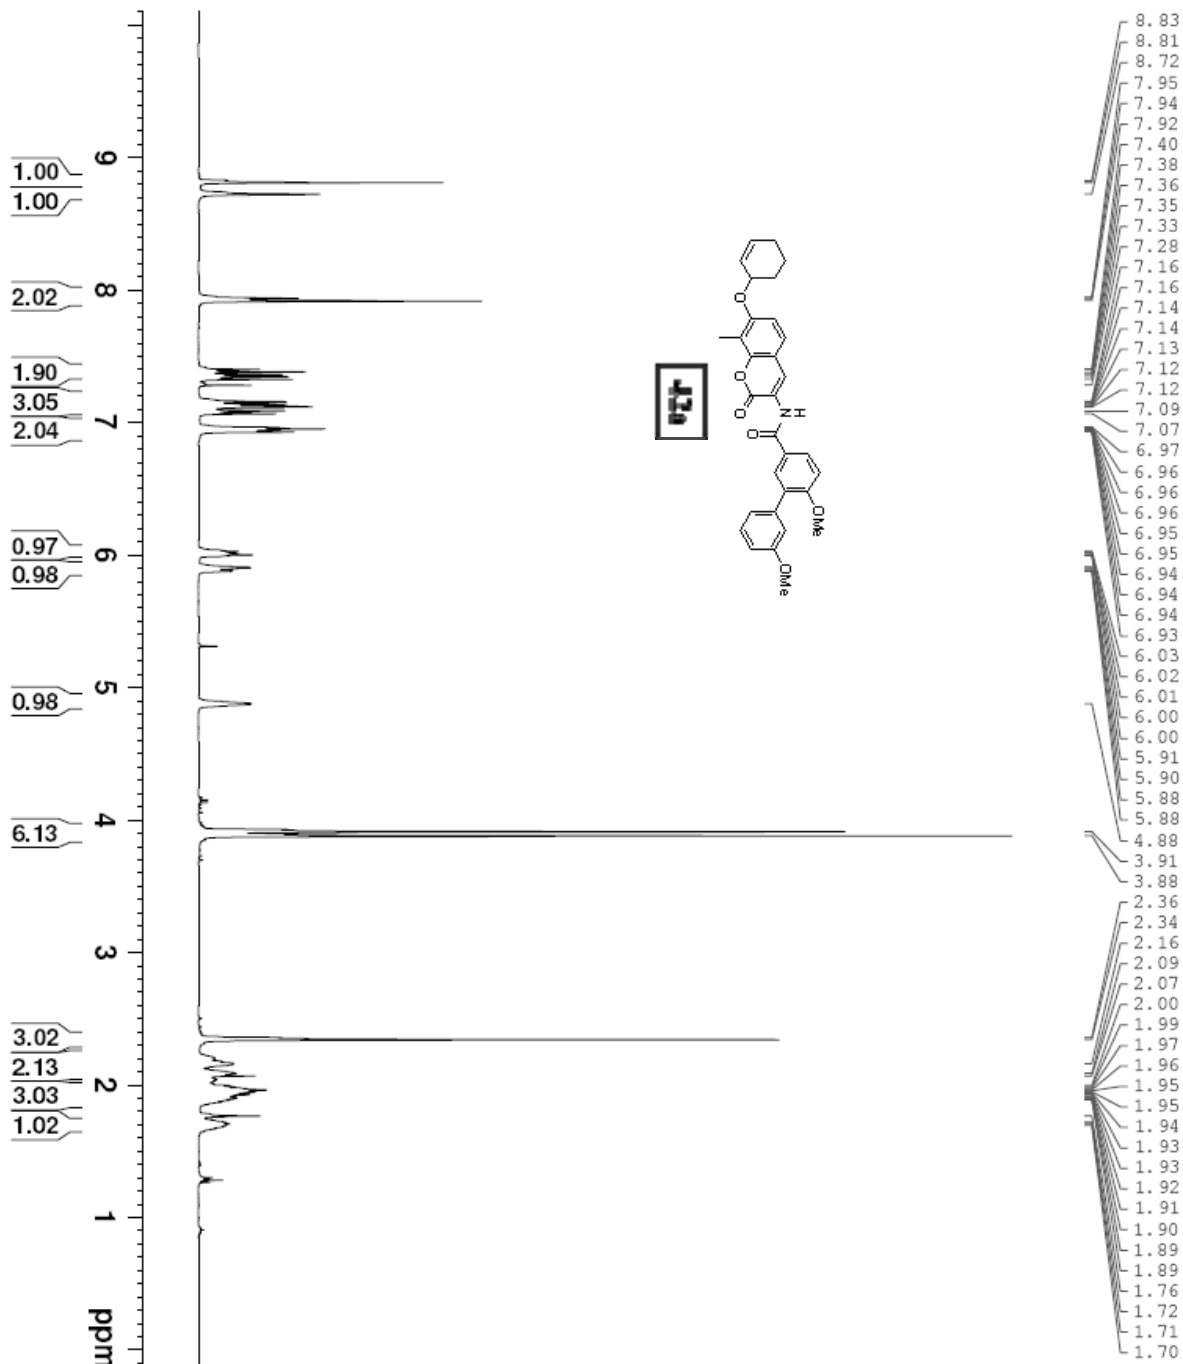

**12a**

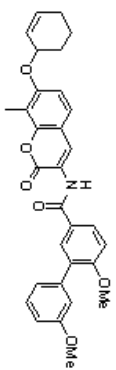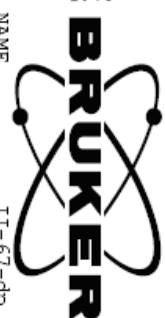

```

NAME II-67-dp
EXPNO 1
PROCNO 1
Date_ 20080908
Time 21.50
INSTRUM dx400
PROBHD 5 mm QNP 1H/13
PULPROG zg30
TD 65536
SOLVENT CDCl3
NS 16
DS 2
SWH 8278.146 Hz
FIDRES 0.126314 Hz
AQ 3.9584243 sec
RG 90.5
DW 60.400 usec
DE 6.00 usec
TE 294.1 K
D1 1.00000000 sec
TD0 1
===== CHANNEL f1 =====
NUC1 1H
P1 10.50 usec
PL1 -5.00 dB
SFO1 400.1324710 MHz
SI 32768
SF 400.1300000 MHz
WDW EM
SSB 0
LB 0.30 Hz
GB 0
PC 1.00
    
```

8.83  
8.81  
8.72  
7.95  
7.94  
7.92  
7.40  
7.38  
7.36  
7.35  
7.33  
7.28  
7.16  
7.16  
7.14  
7.14  
7.13  
7.12  
7.12  
7.09  
7.07  
6.97  
6.96  
6.96  
6.95  
6.95  
6.94  
6.94  
6.94  
6.93  
6.03  
6.02  
6.01  
6.00  
6.00  
5.91  
5.90  
5.88  
5.88  
4.88  
3.91  
3.88  
2.36  
2.34  
2.16  
2.09  
2.07  
2.00  
1.99  
1.97  
1.96  
1.95  
1.95  
1.94  
1.93  
1.93  
1.92  
1.91  
1.90  
1.89  
1.89  
1.76  
1.72  
1.71  
1.70

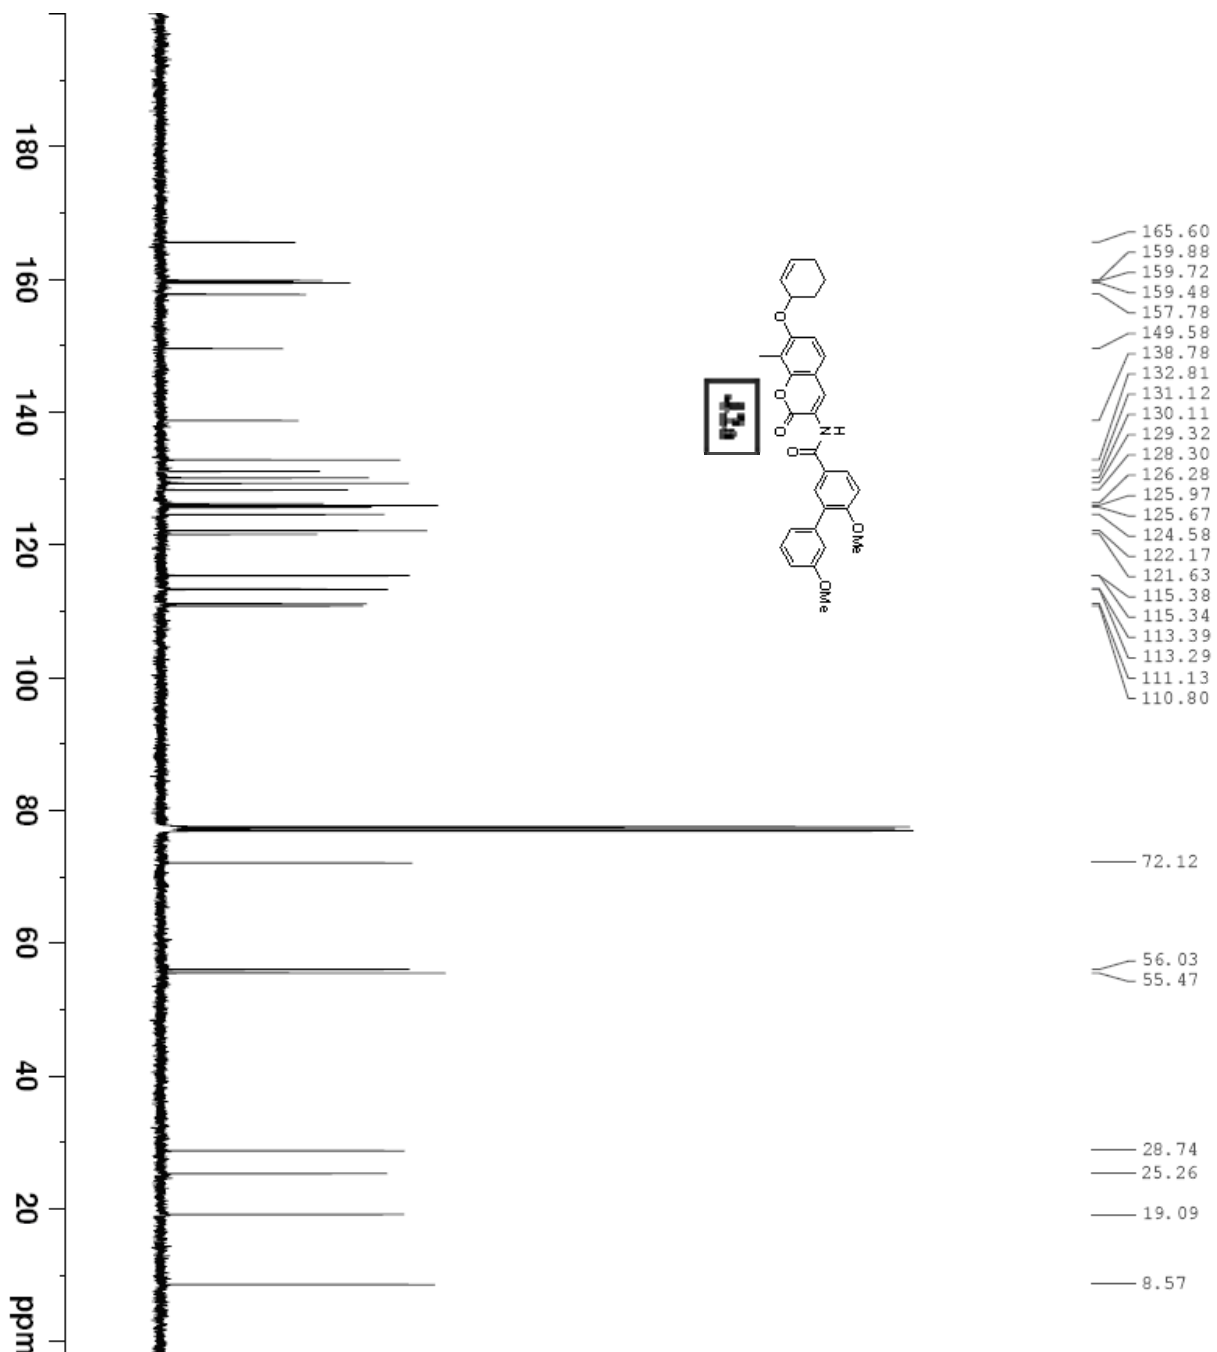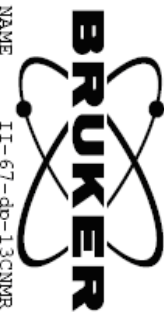

NAME II-67-dp-13CNMR  
 EXPNO 1  
 PROCNO 1  
 Date\_ 20080908  
 Time 22.23  
 INSTRUM dx400  
 PROBRD 5 mm QNP 1H/13  
 PULPROG zgpg30  
 TD 65536  
 SOLVENT CDCl3  
 NS 512  
 DS 4  
 SWH 23980.814 Hz  
 FIDRES 0.365918 Hz  
 AQ 1.3664756 sec  
 RG 6502  
 DW 20.850 usec  
 DE 6.00 usec  
 TE 294.3 K  
 D1 2.00000000 sec  
 d11 0.03000000 sec  
 DELTA 1.839999998 sec  
 TD0 1

===== CHANNEL F1 =====  
 NUC1 13C  
 P1 9.85 usec  
 PL1 -2.00 dB  
 SFO1 100.6228298 MHz

===== CHANNEL F2 =====  
 CPDPRG2 waltz16  
 NUC2 1H  
 PCPD2 100.00 usec  
 PL2 -5.00 dB  
 PL12 14.58 dB  
 PL13 16.00 dB  
 SFO2 400.1316005 MHz  
 SI 32768  
 SF 100.6127548 MHz  
 WDW EM  
 SSB 0  
 LB 1.00 Hz  
 GB 0  
 PC 1.40

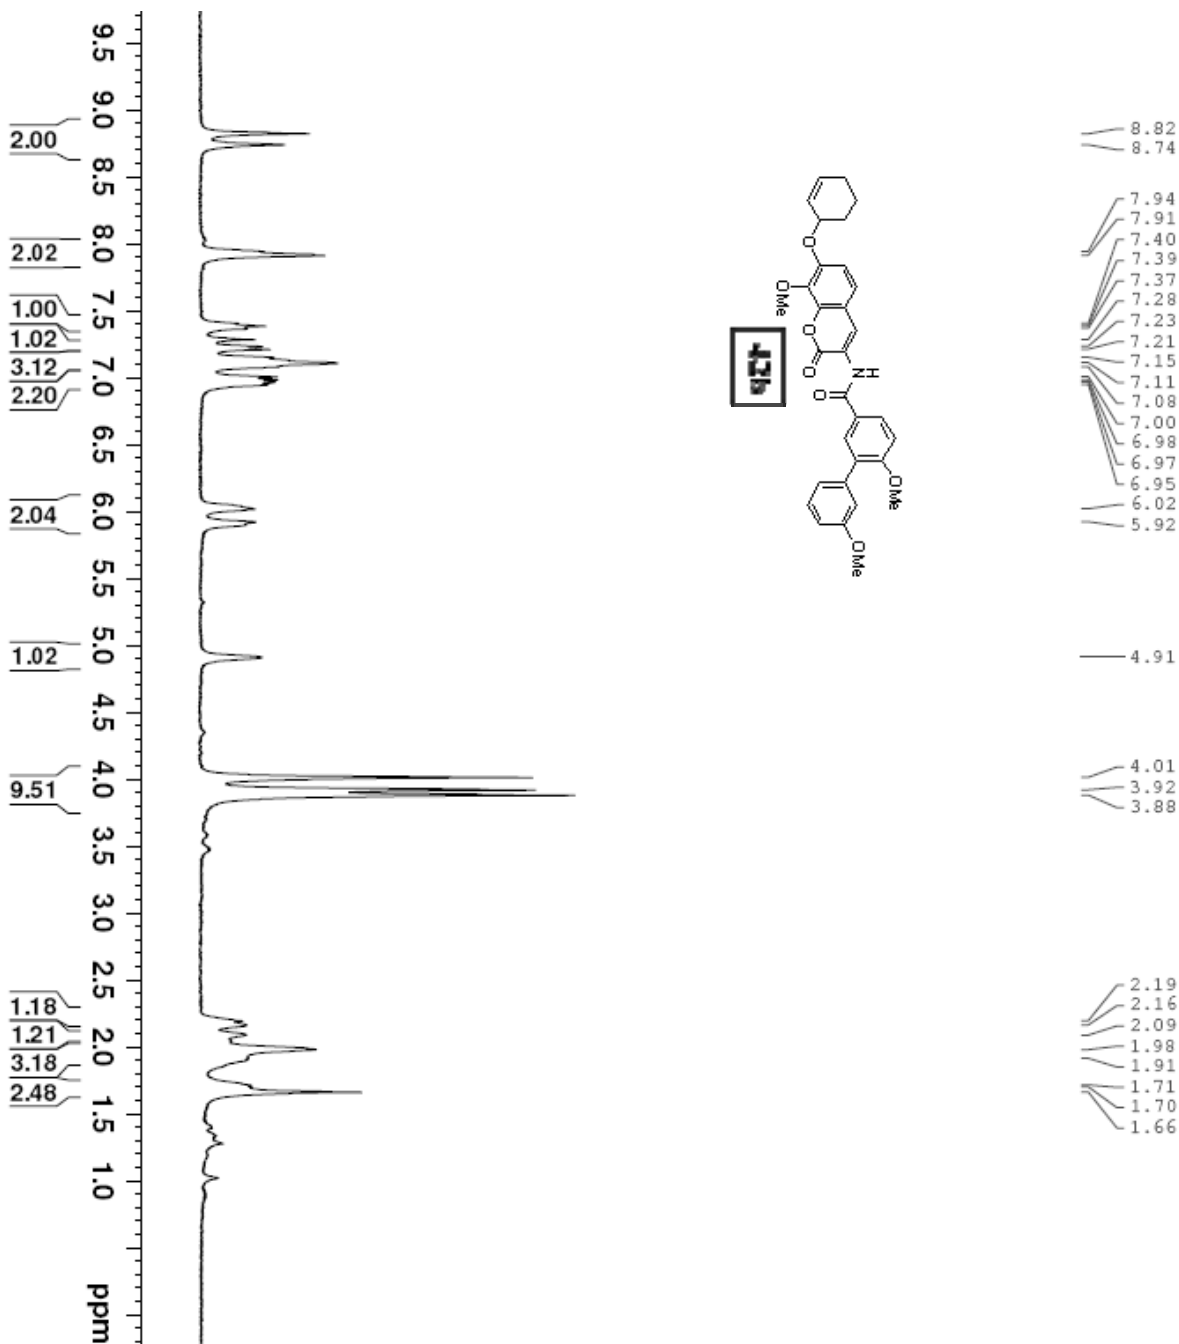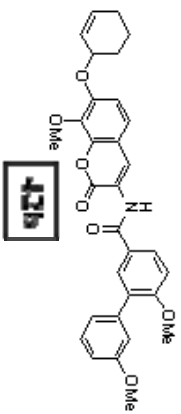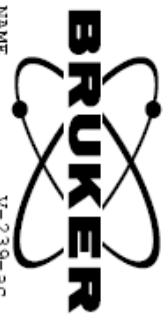

```

NAME V-239-ac
EXPNO 1
PROCNO 1
Date_ 20090506
Time 13.10
INSTRUM dtx400
PROBHD 5 mm QNP 1H/13
PULPROG zg30
TD 65536
SOLVENT CDCl3
NS 16
DS 2
SWH 8278.146 Hz
FIDRES 0.126314 Hz
AQ 3.9584243 sec
RG 4
DE 60.400 usec
TE 294.5 K
D1 1.00000000 sec
ID0 1

===== CHANNEL f1 =====
NUC1 1H
P1 10.50 usec
PL1 -5.00 dB
SFO1 400.1324710 MHz
SI 32768
SF 400.1300000 MHz
WDW EM
SSB 0
LB 0.30 Hz
GB 0
PC 1.00
    
```

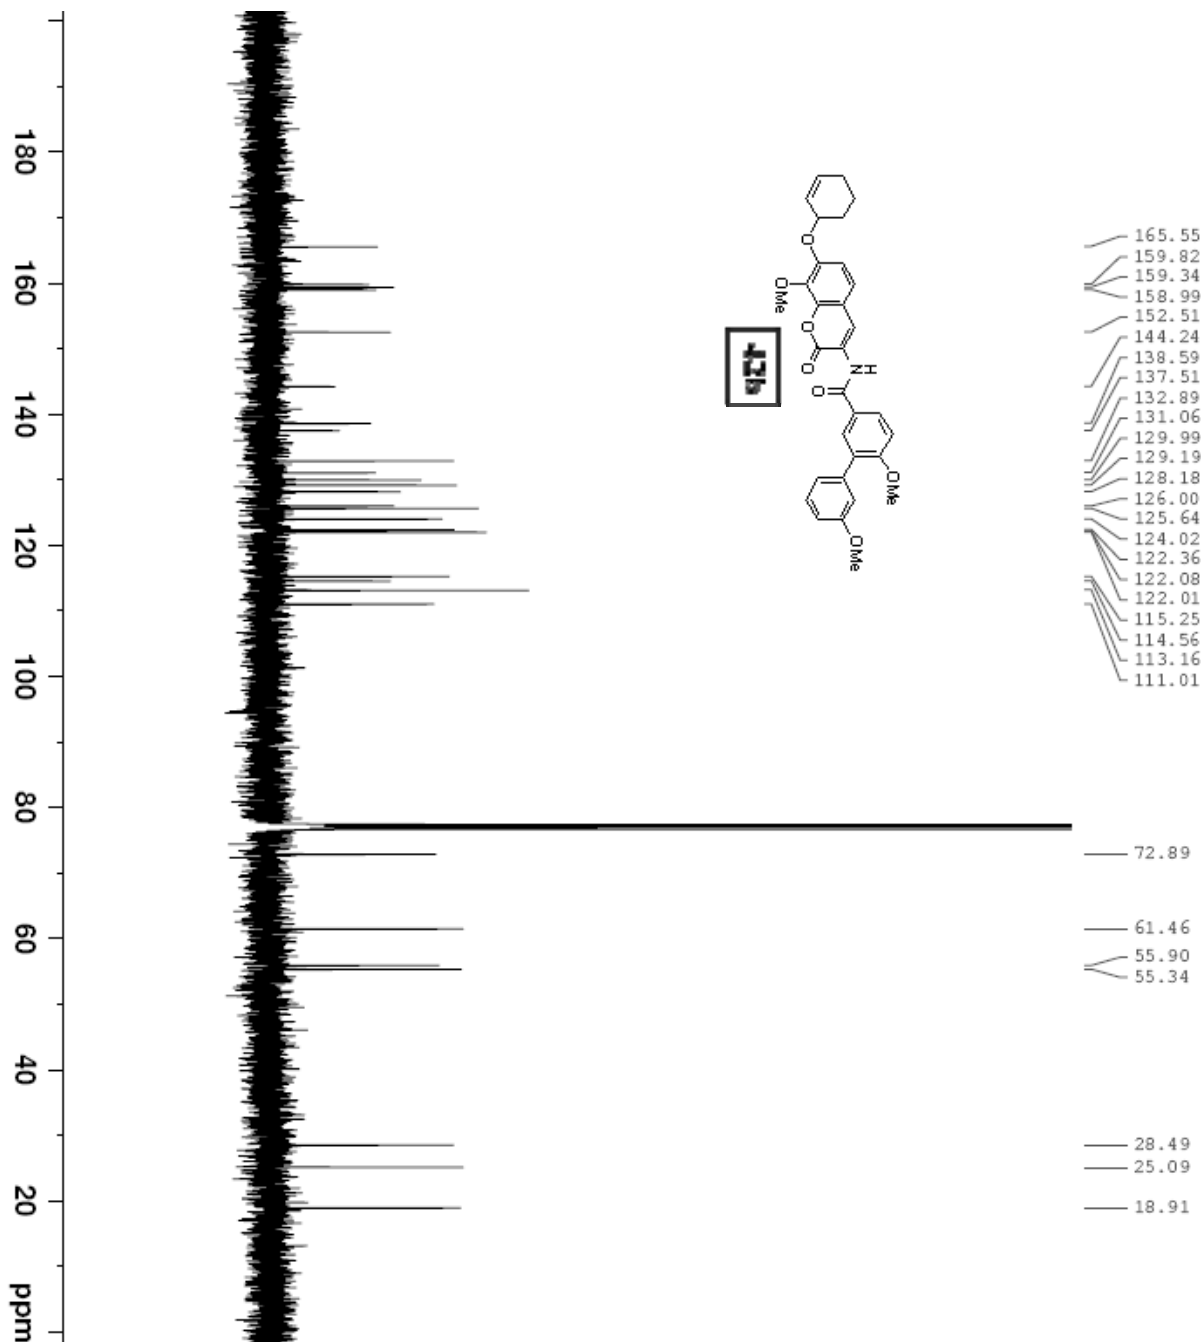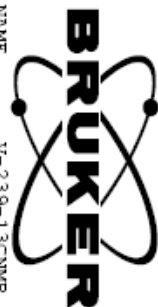

V-239-13CNMR

```

NAME          V-239-13CNMR
EXPNO         1
PROCNO        1
Date_         20090506
Time         13.27
INSTRUM       dtx400
PROBHD        5 mm QNP 1H/13
PULPROG       zgpg30
TD            65536
SOLVENT       CDCl3
NS            304
DS            4
SWH           23980.814 Hz
FIDRES        0.365918 Hz
AQ            1.3664756 sec
RG            32768
DE            20.850 usec
TE            294.6 K
D1            2.00000000 sec
d11           0.03000000 sec
DELTA         1.89999998 sec
ID0           2
    
```

```

===== CHANNEL F1 =====
NUC1          13C
P1            9.85 usec
PL1          -2.00 dB
SFO1         100.6228298 MHz
    
```

```

===== CHANNEL F2 =====
CPDPRG2      waitz16
NUC2          1H
PCPD2        100.00 usec
PL2          -5.00 dB
PL12         14.58 dB
PL13         16.00 dB
SFO2         400.1316005 MHz
SI           32768
SF           100.6127690 MHz
KMDW         EM
SSB          0
LB           1.00 Hz
GB           0
PC           1.40
    
```



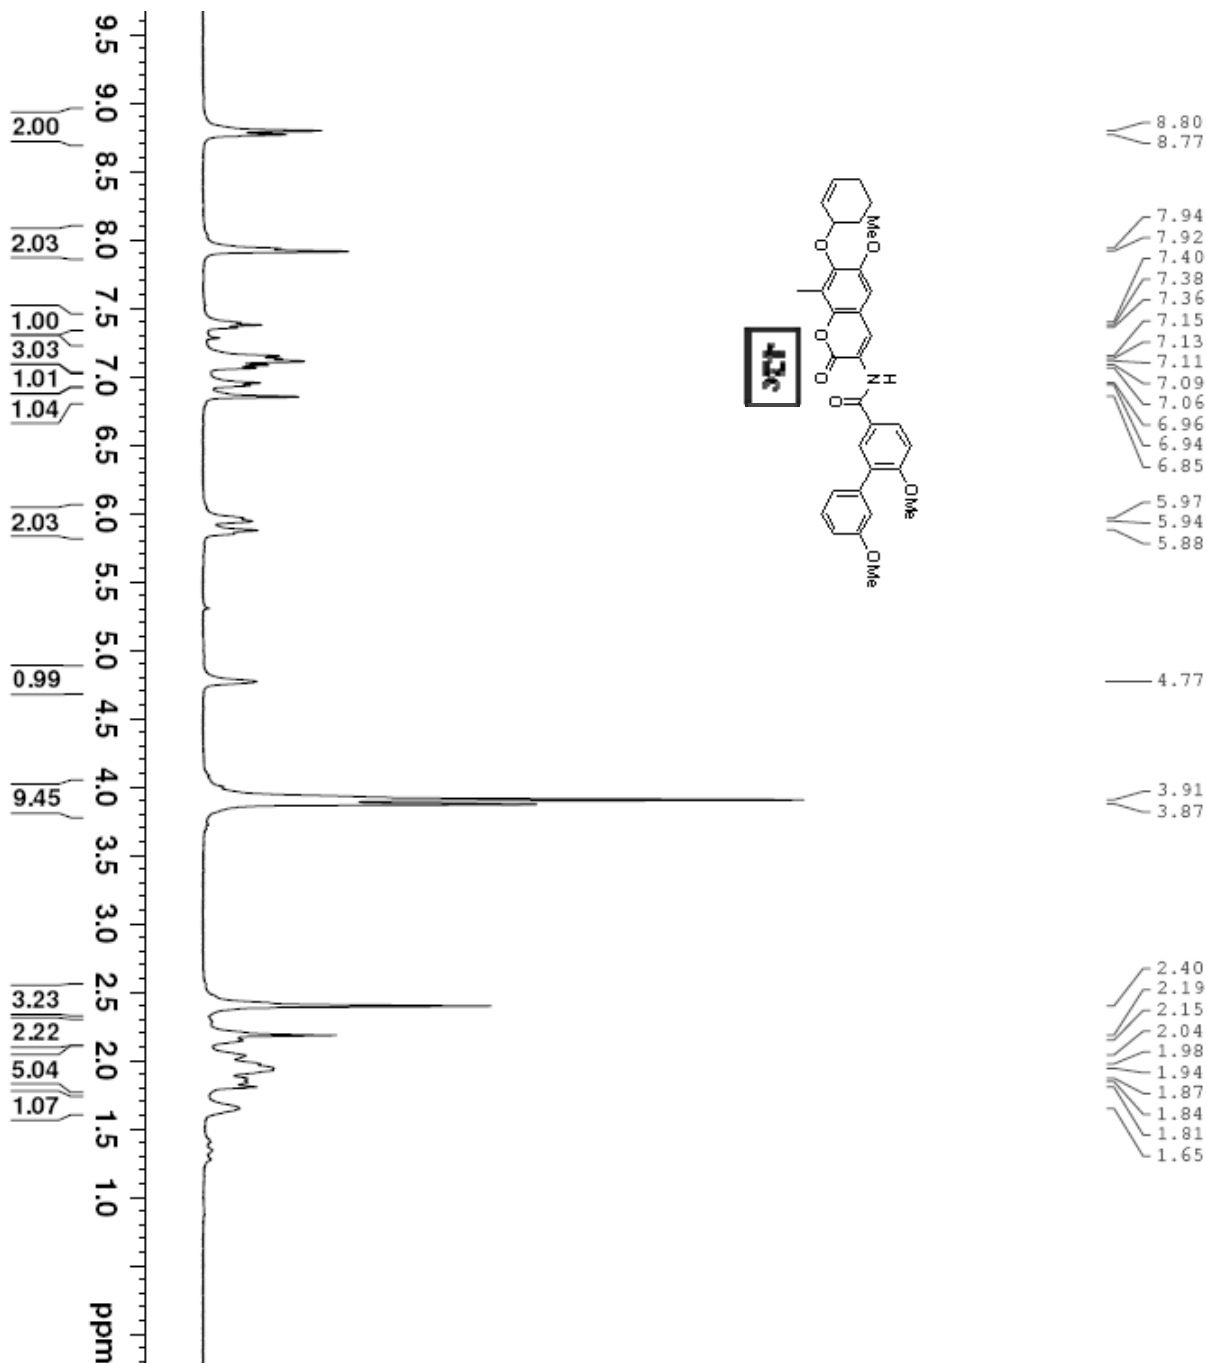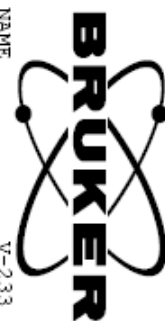

```

NAME          V-233
EXPNO         1
PROCNO        1
Date_         20090505
Time         13.35
INSTRUM       drx400
PROBHD        5 mm QNP 1H/13
PULPROG       zg30
TD            65536
SOLVENT       CDCl3
NS            16
DS            2
SWH           8278.146 HZ
FIDRES        0.126314 HZ
AQ            3.9584243 sec
RG            4
DW            60.400 usec
DE            6.00 usec
TE            294.5 K
D1            1.000000000 sec
ID0           1

===== CHANNEL f1 =====
NUC1          1H
P1            10.50 usec
PL1           -5.00 dB
SFO1          400.1324710 MHz
SI            32768
SF            400.1300000 MHz
WDW           EM
SSB           0
LB            0.30 HZ
GB            0
PC            1.00
    
```

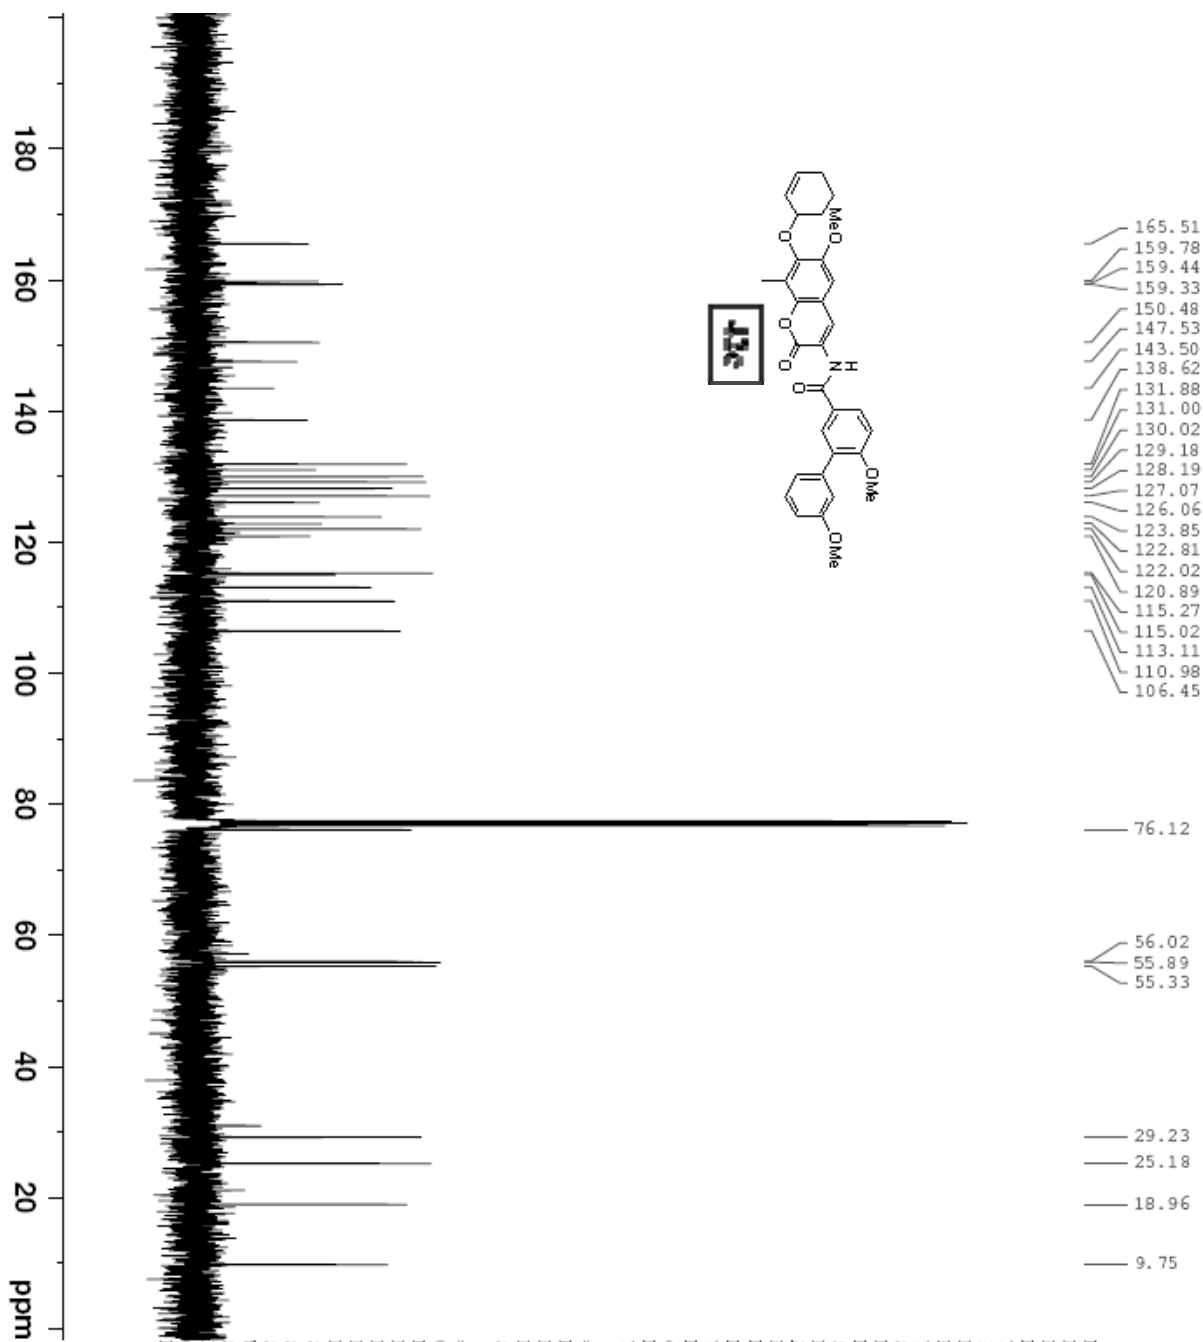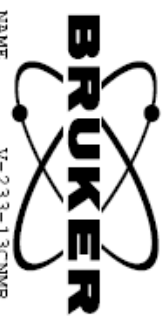

```

NAME V-233-13CNMR
EXPNO 1
PROCNO 1
Date_ 20090505
Time_ 13.39
INSTRUM dtx400
PROBHD 5 mm QNP 1H/13
PULPROG zgpg30
ID 65536
SOLVENT CDCl3
NS 65
DS 4
SWH 23980.814 Hz
FIDRES 0.365918 Hz
AQ 1.3664756 sec
RG 32768
DW 20.850 usec
DE 6.00 usec
TE 294.6 K
D1 2.00000000 sec
d11 0.03000000 sec
DELTA 1.89999998 sec
TD0 2
    
```

```

===== CHANNEL f1 =====
NUC1 13C
P1 9.85 usec
PL1 -2.00 dB
SFO1 100.6228298 MHz
    
```

```

===== CHANNEL f2 =====
CPDPRG2 waltz16
NUC2 1H
PCPD2 100.00 usec
PL2 -5.00 dB
PL12 14.58 dB
PL13 16.00 dB
SFO2 400.1316005 MHz
SI 32768
SF 100.6127690 MHz
WDW EM
SSB 0
LB 1.00 Hz
GB 0
PC 1.40
    
```

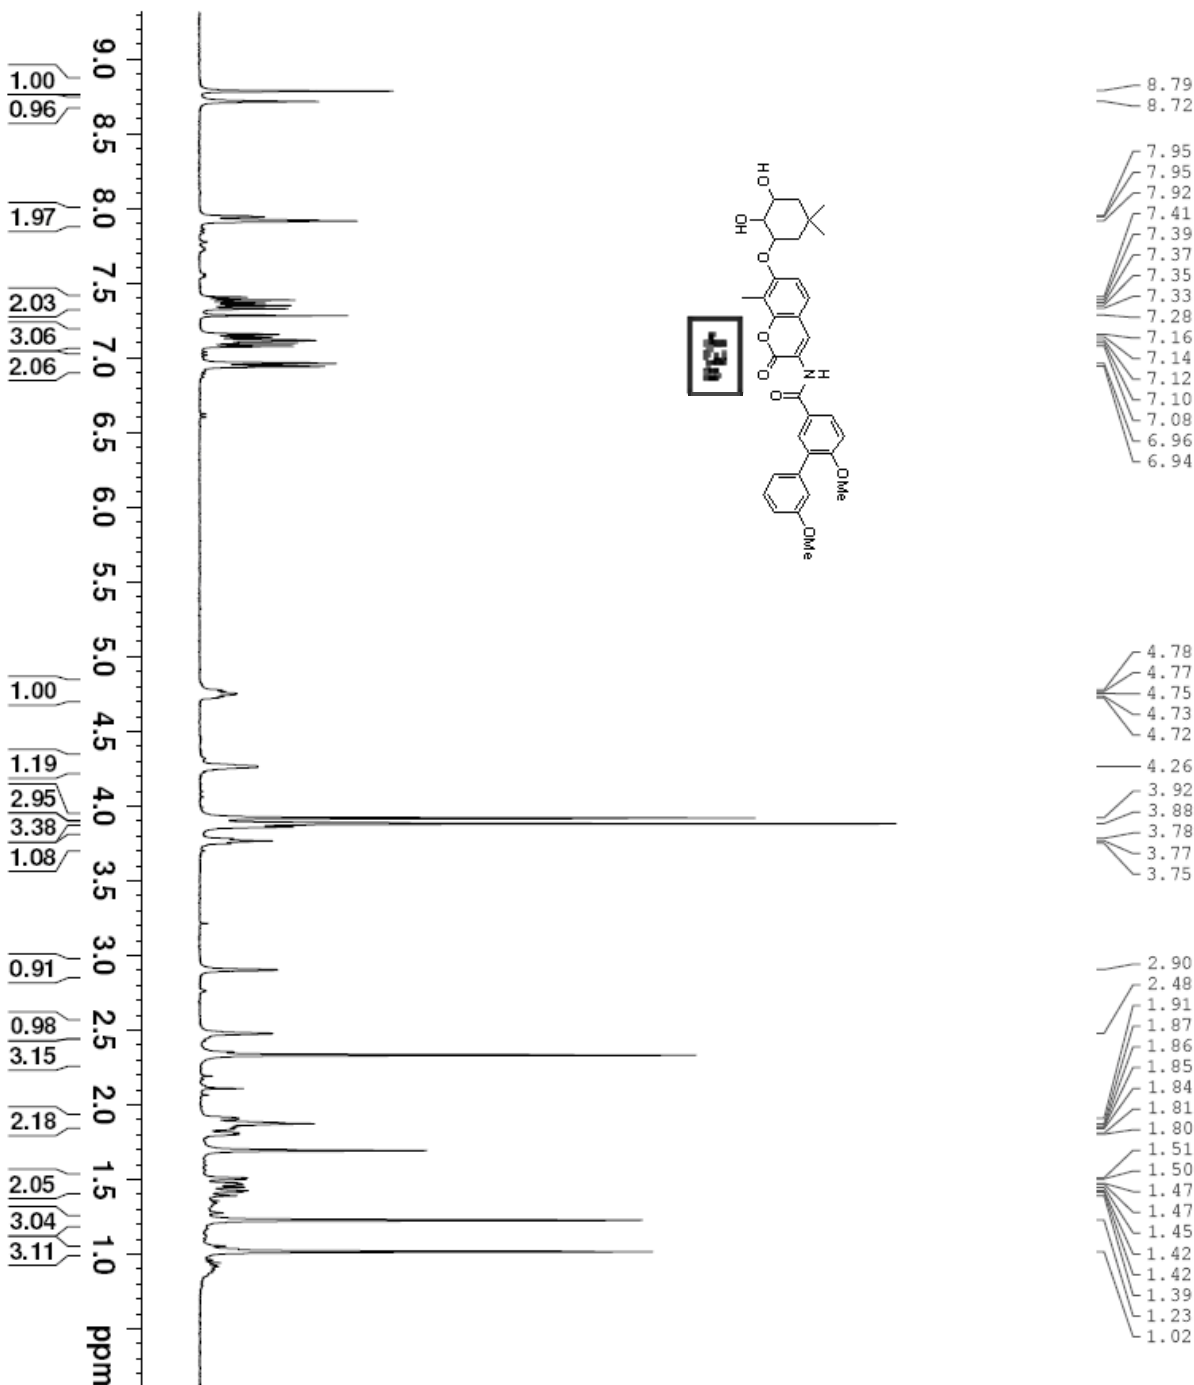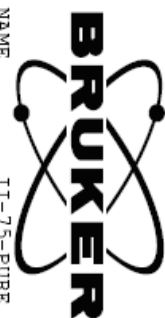

```

NAME      II-75-PURE
EXPNO     1
PROCNO    1
Date_     20080909
Time      20.57
INSTRUM   drx400
PROBHD    5 mm QNP 1H/13
PULPROG   zg30
TD         65536
SOLVENT   CDCl3
NS         16
DS         2
SWH        8278.146 Hz
FIDRES     0.126314 Hz
AQ         3.9584243 sec
RG          4
DW          60.400 usec
DE          6.00 usec
TE         294.3 K
D1         1.00000000 sec
TD0        1

===== CHANNEL f1 =====
NUC1      13C
P1        10.50 usec
PL1       -5.00 dB
SFO1      400.1324710 MHz
SI        32768
SF        400.1300000 MHz
WDW       EM
SSB       0
LB        0.30 Hz
GB        0
PC        1.00
    
```

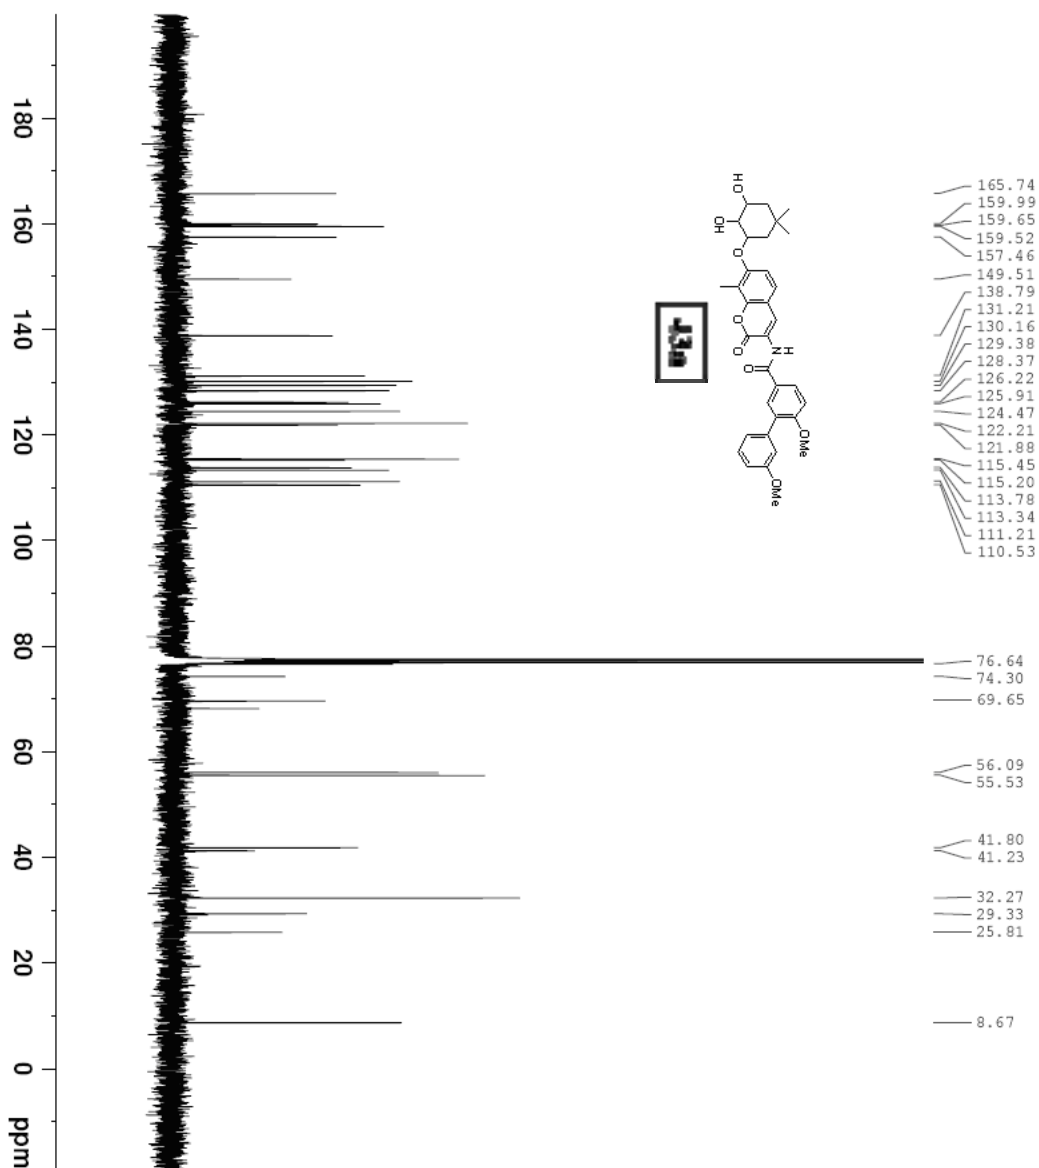

- 165.74
- 159.99
- 159.65
- 159.52
- 157.46
- 149.51
- 138.79
- 131.21
- 130.16
- 129.38
- 128.37
- 126.22
- 125.91
- 124.47
- 122.21
- 121.88
- 115.45
- 115.20
- 113.78
- 113.34
- 111.21
- 110.53

- 76.64
- 74.30
- 69.65

- 56.09
- 55.53

- 41.80
- 41.23

- 32.27
- 29.33
- 25.81

- 8.67

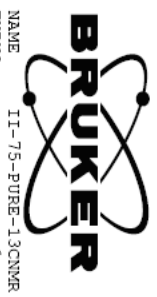

```

NAME II-75-PURE-13CNMR
EXPNO 1
PROCNO 1
Date_ 20080909
Time 22.05
INSTRUM dxt400
PROBHD 5 mm QNP 1H/13
PULPROG zgpg30
TD 65536
SOLVENT CDCl3
NS 1024
DS 4
SWH 23980.814 Hz
FIDRES 0.365918 Hz
AQ 1.3664756 sec
RG 4597.6
DW 20.850 usec
DE 6.00 usec
TE 294.5 K
D1 2.00000000 sec
d11 0.03000000 sec
DELTA 1.89999998 sec
TD0 1

===== CHANNEL f1 =====
NUC1 13C
P1 9.85 usec
PL1 -2.00 dB
SFO1 100.6228298 MHz

===== CHANNEL f2 =====
CPDPRG2 waltz16
NUC2 1H
PCPD2 100.00 usec
PL2 -5.00 dB
PL12 14.58 dB
PL13 16.00 dB
SFO2 400.1316005 MHz
SI 32768
SF 100.6127489 MHz
WDW EM
SSB 0
LB 1.00 Hz
GB 0
PC 1.40
    
```

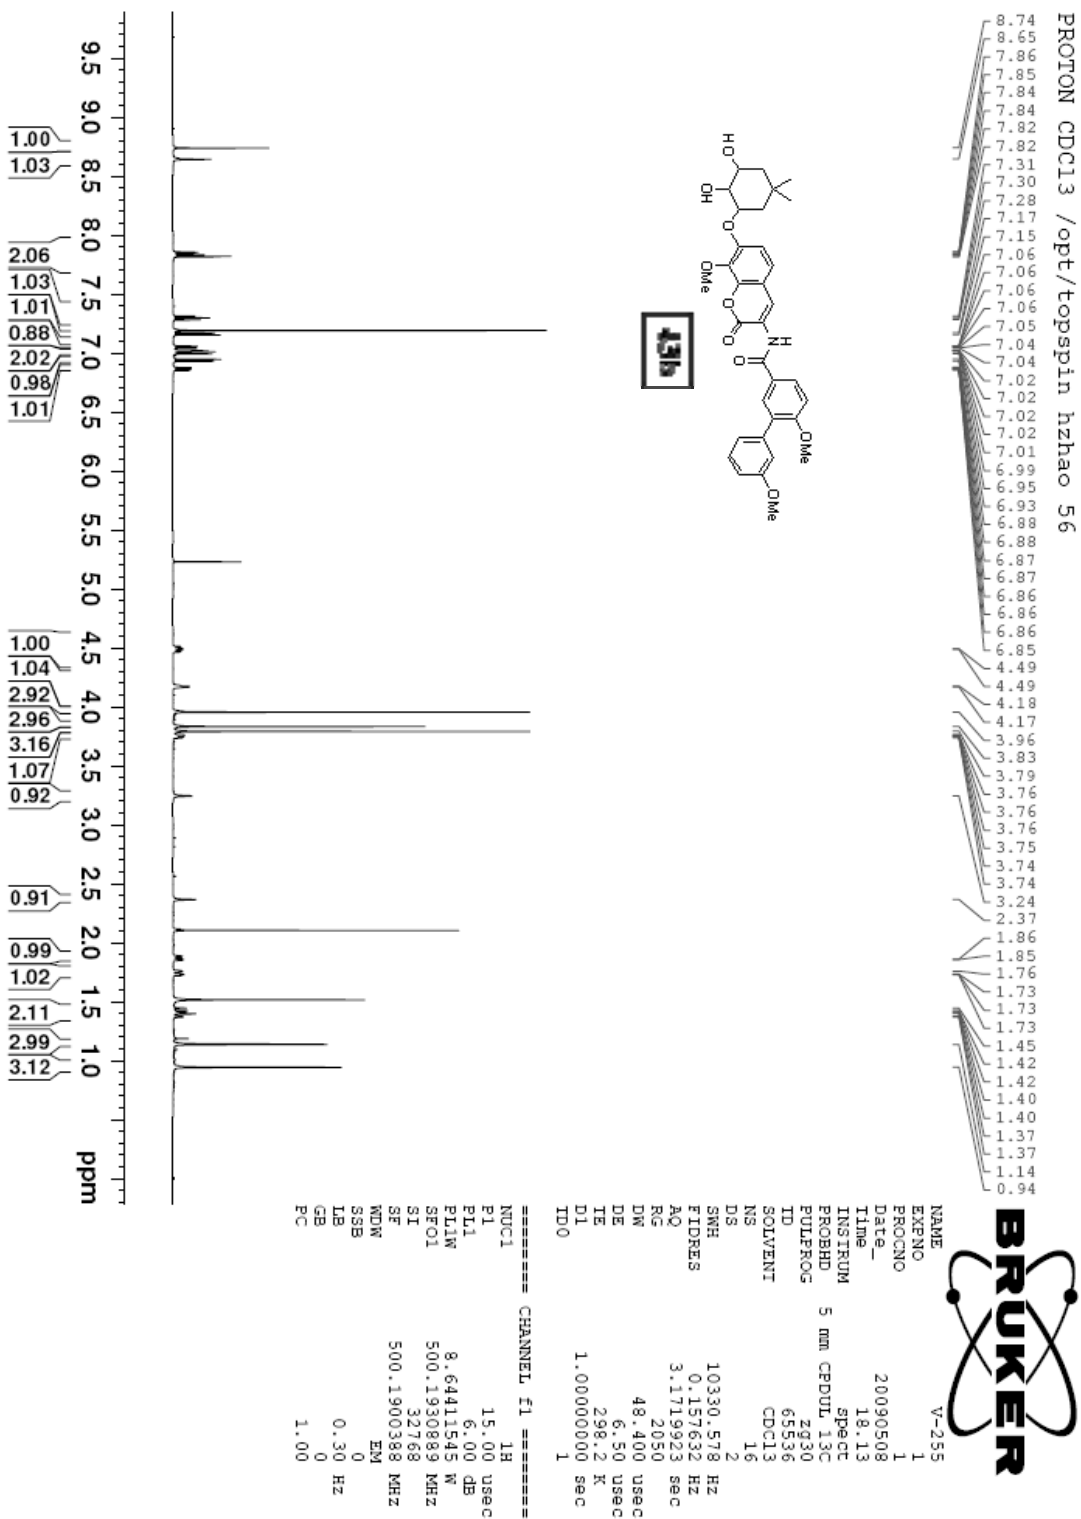

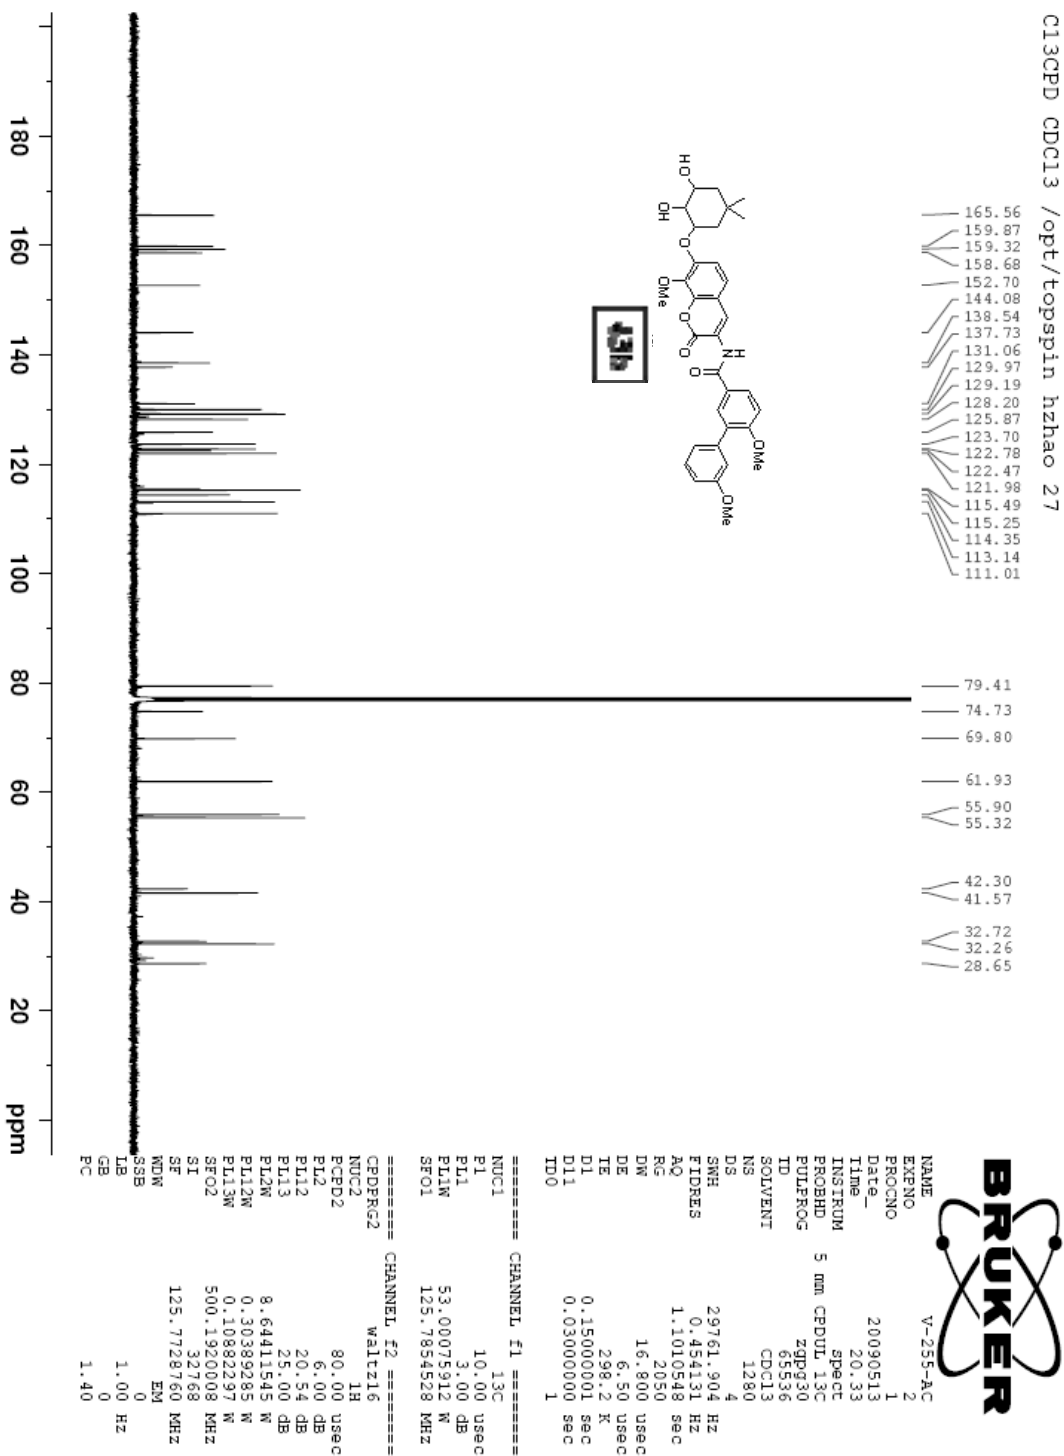

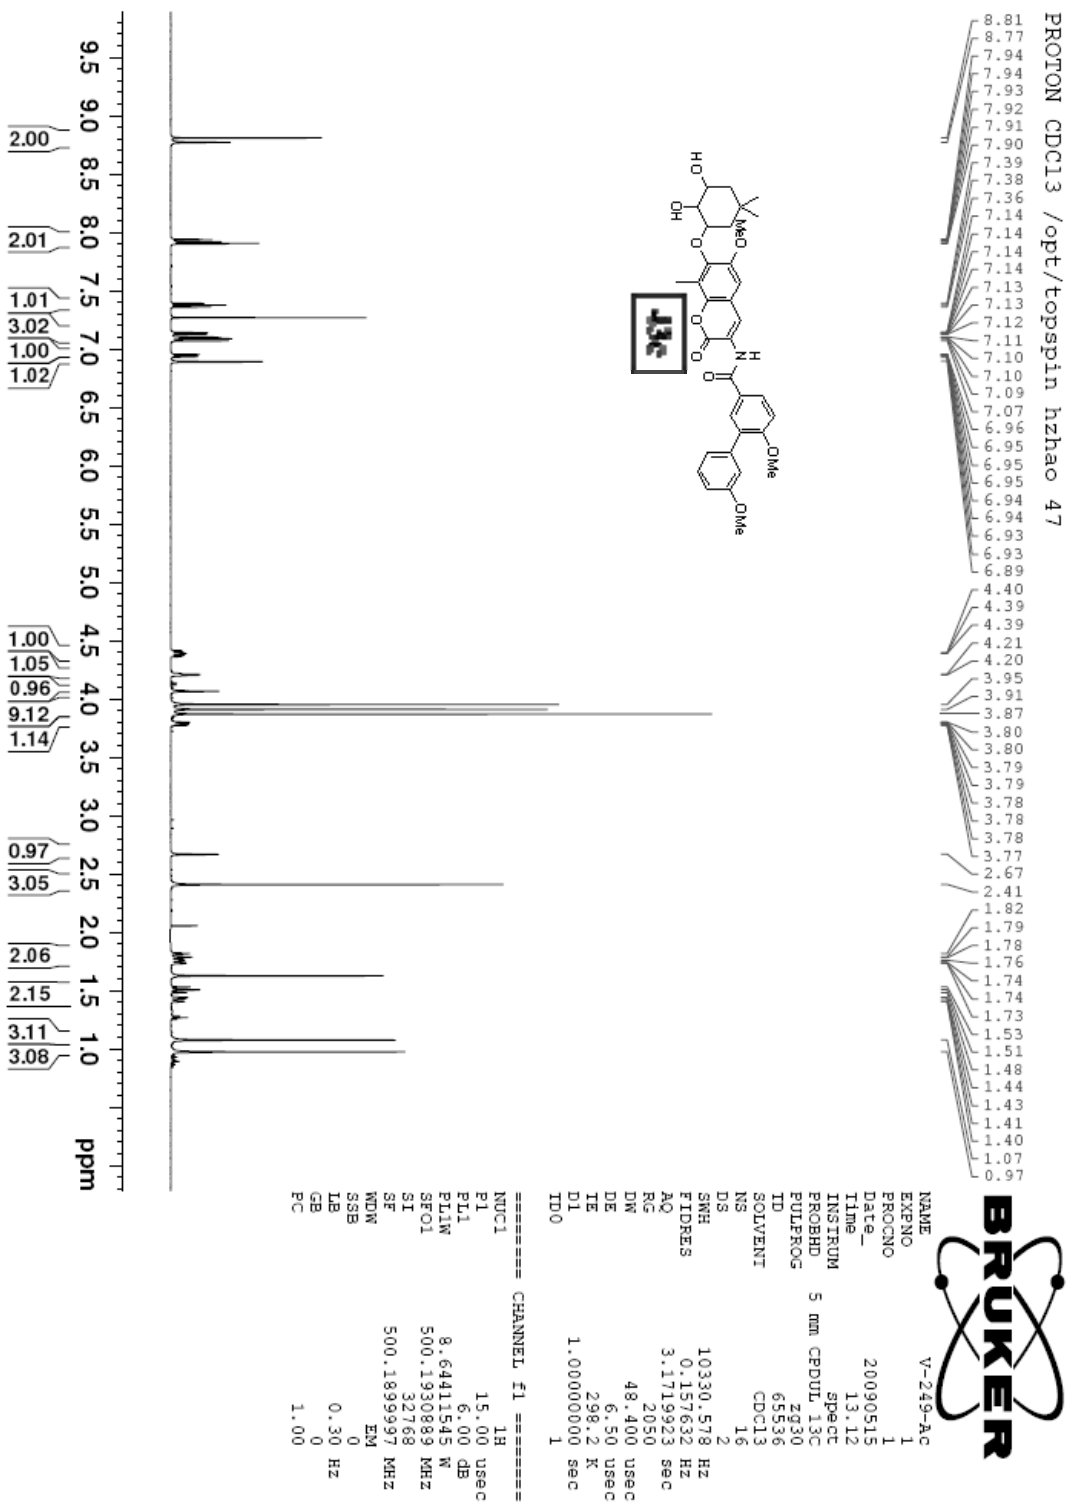

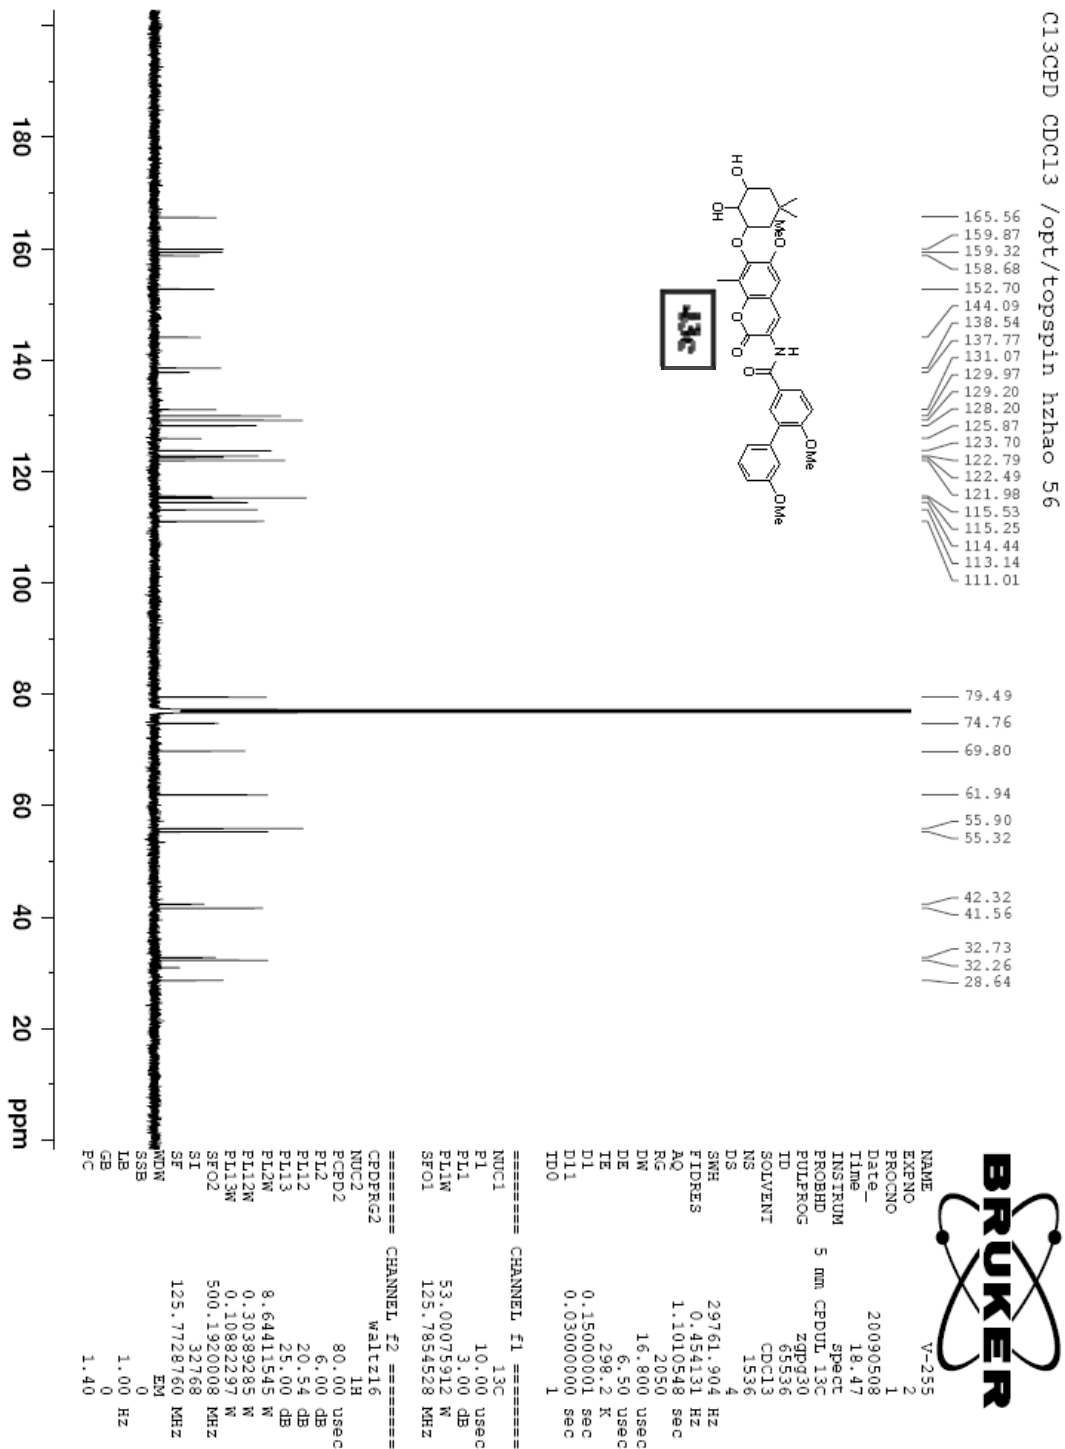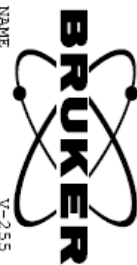



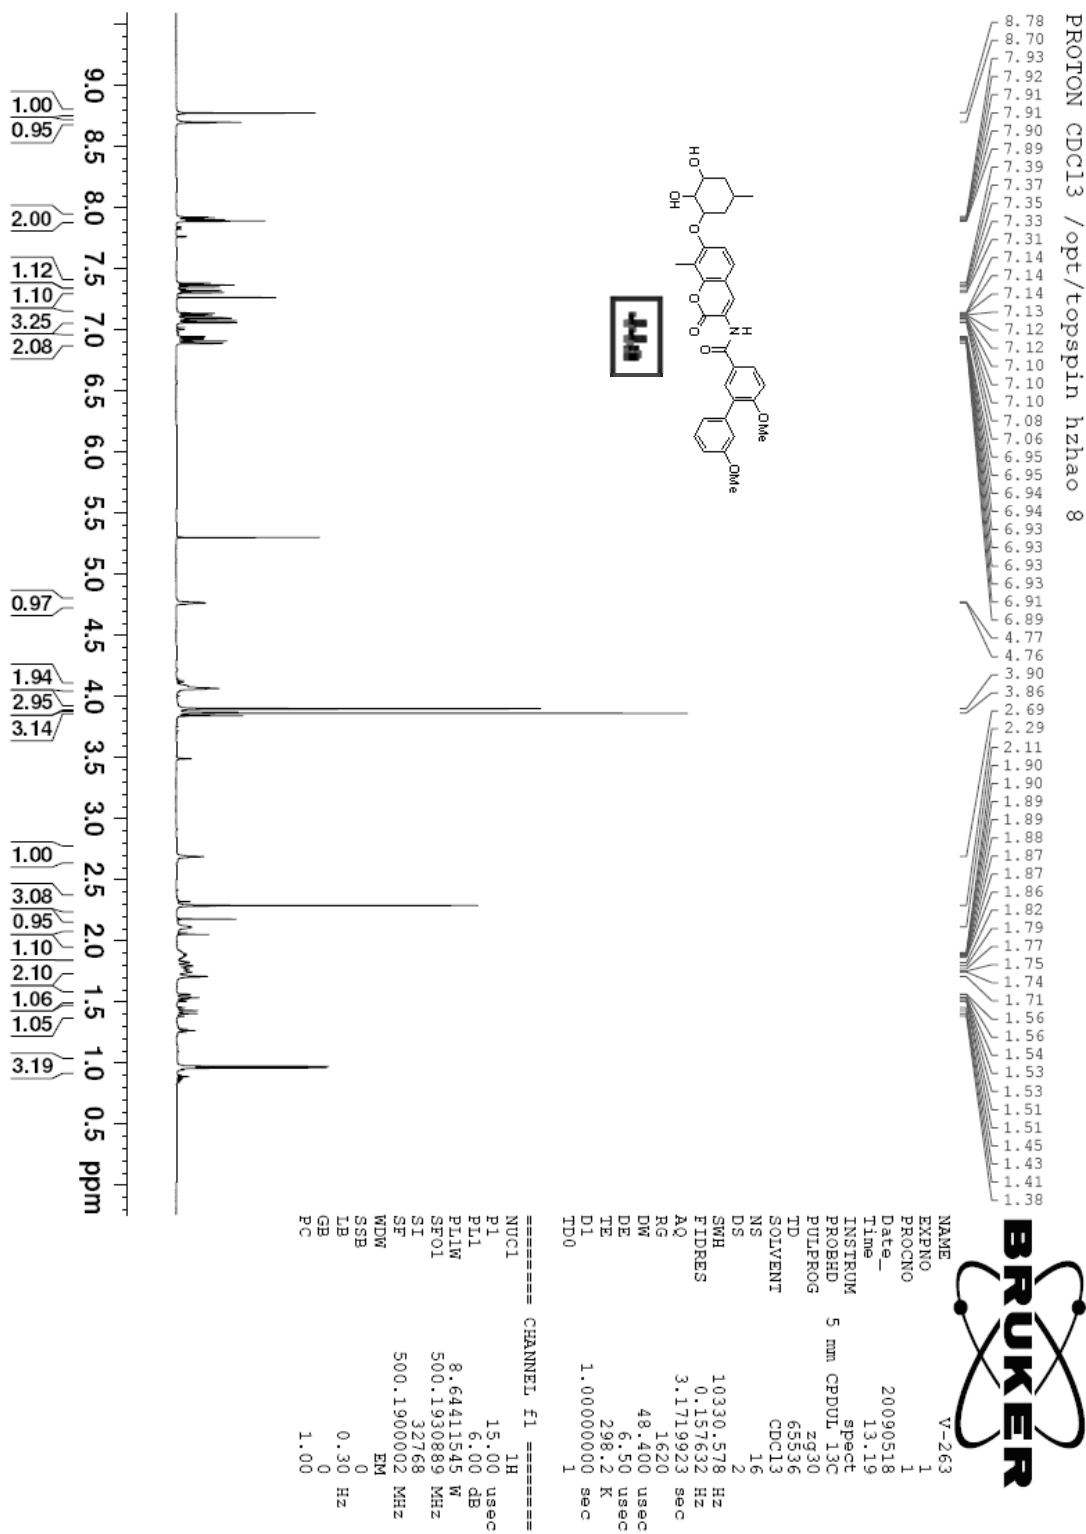

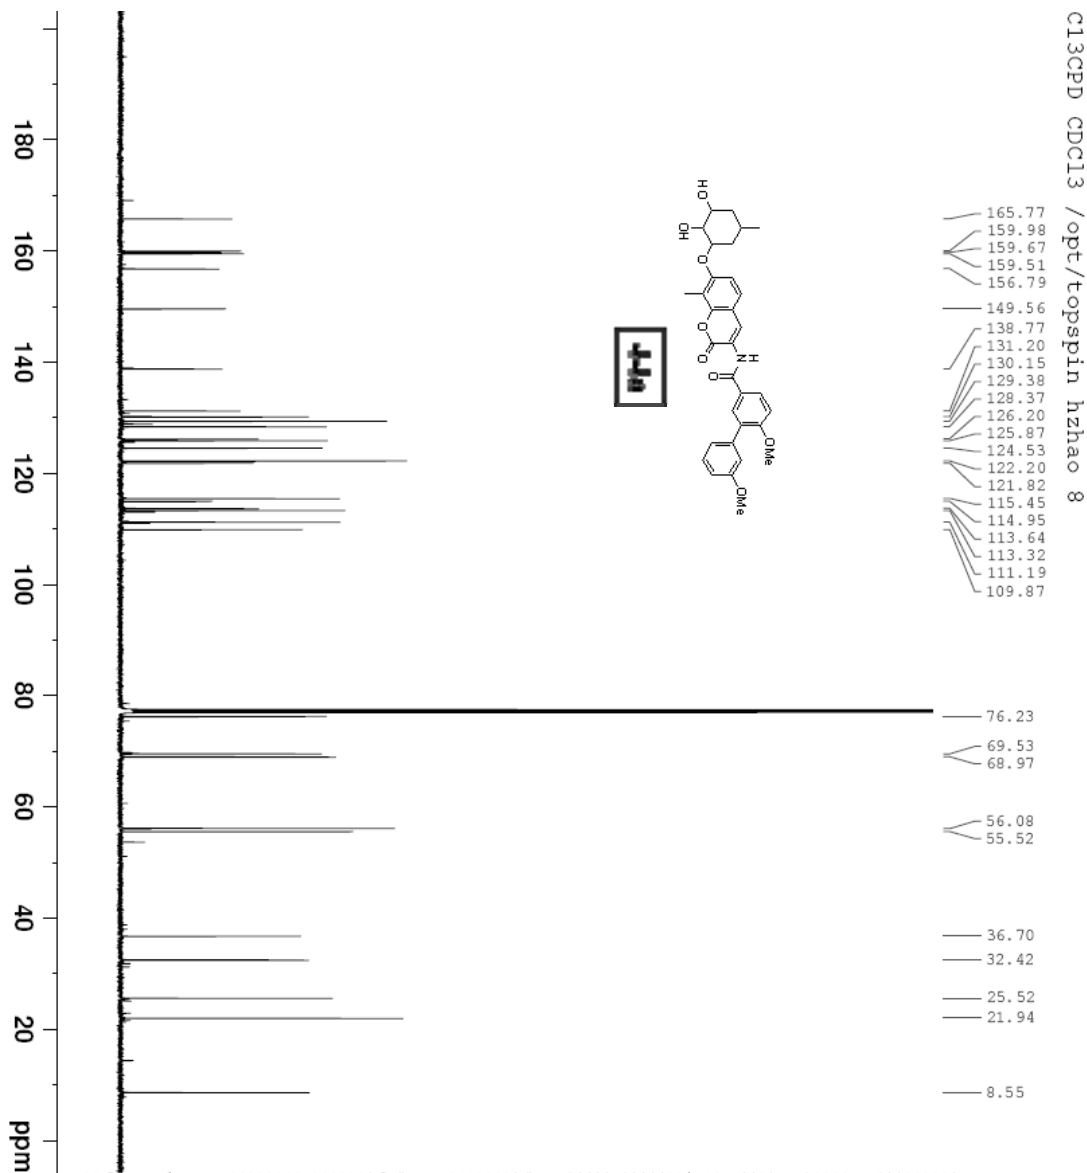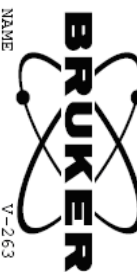

NAME V-263  
EXPNO 2  
PROCNO 1  
Date\_ 20090518  
Time\_ 13.42  
INSTRUM spect  
PROBHD 5 mm CPDUL 13C  
PULPROG zgpg30  
TD 65536  
SOLVENT CDCl3  
NS 1024  
DS 4  
SWH 29761.904 Hz  
FIDRES 0.454131 Hz  
AQ 1.1010548 sec  
RG 2050  
DE 16.800 usec  
TE 298.2 K  
D1 0.1500001 sec  
D11 0.0300000 sec  
TD0 1

==== CHANNEL f1 =====  
NUC1 13C  
P1 10.00 usec  
PL1 3.00 dB  
PL1W 53.00075912 W  
SF01 125.7854528 MHz

==== CHANNEL f2 =====  
CPDPRG2 waltz16  
NUC2 1H  
PCPD2 80.00 usec  
PI2 6.00 dB  
PI12 20.54 dB  
PI13 25.00 dB  
PL2W 8.64411545 W  
PL12W 0.30389285 W  
PL13W 0.10882297 W  
SF02 500.1920008 MHz  
SI 32768  
SF 125.7728514 MHz  
WDW EM  
SSB 0  
GB 1.00 Hz  
PC 1.40

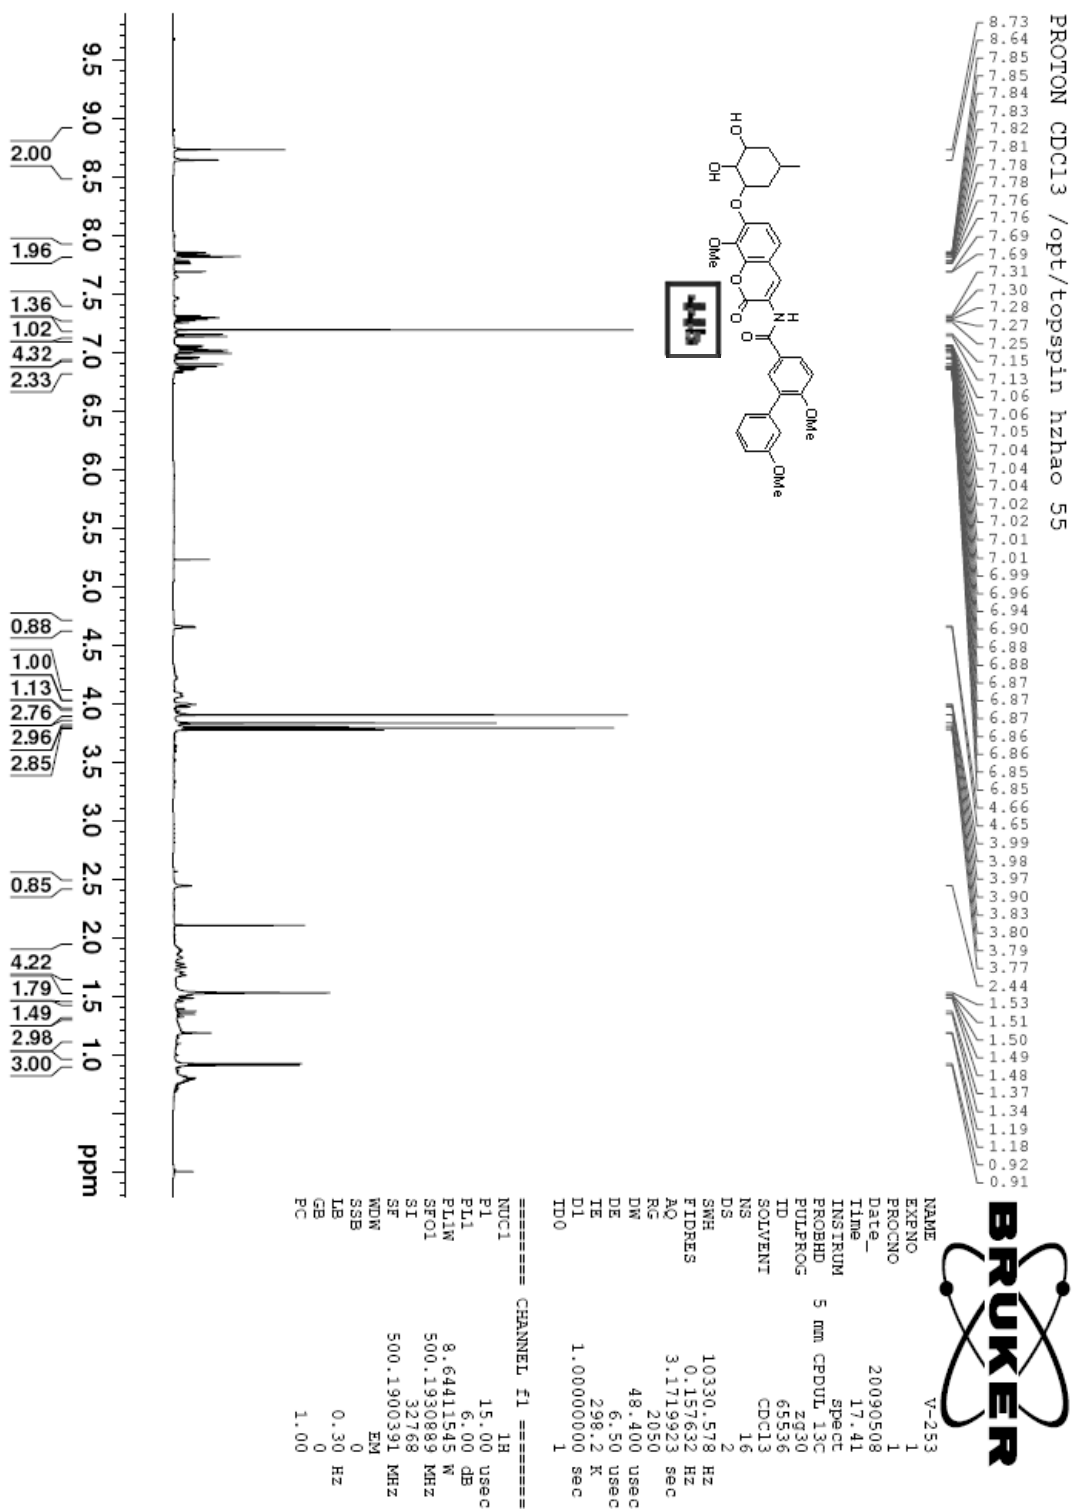

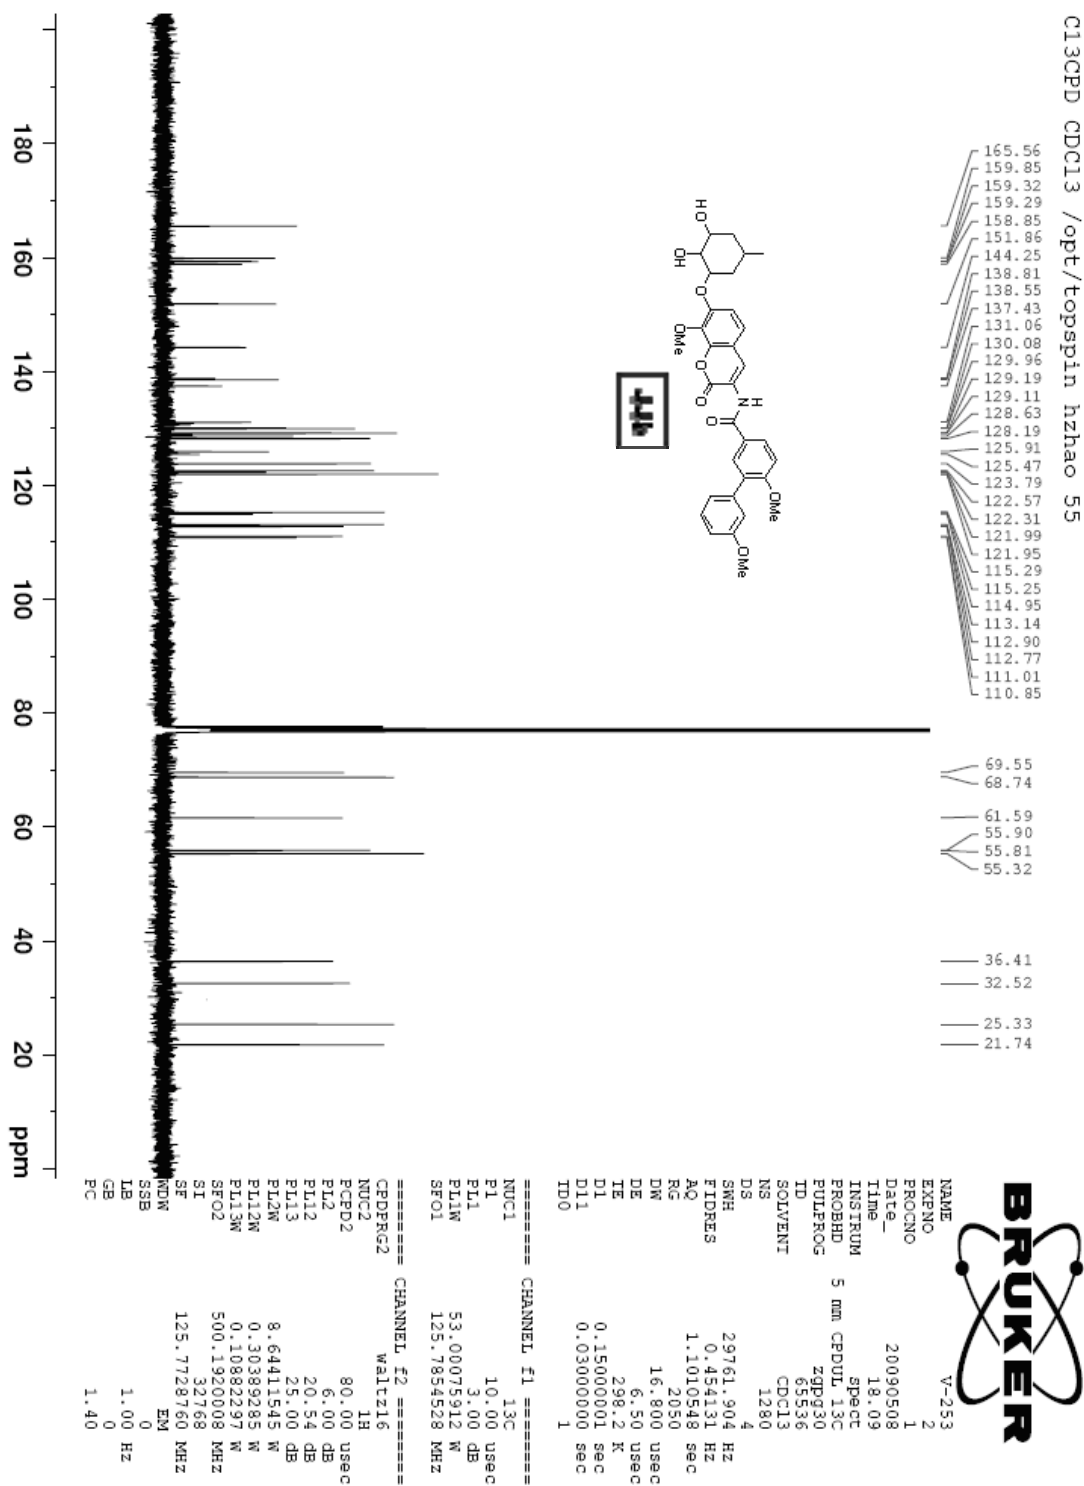

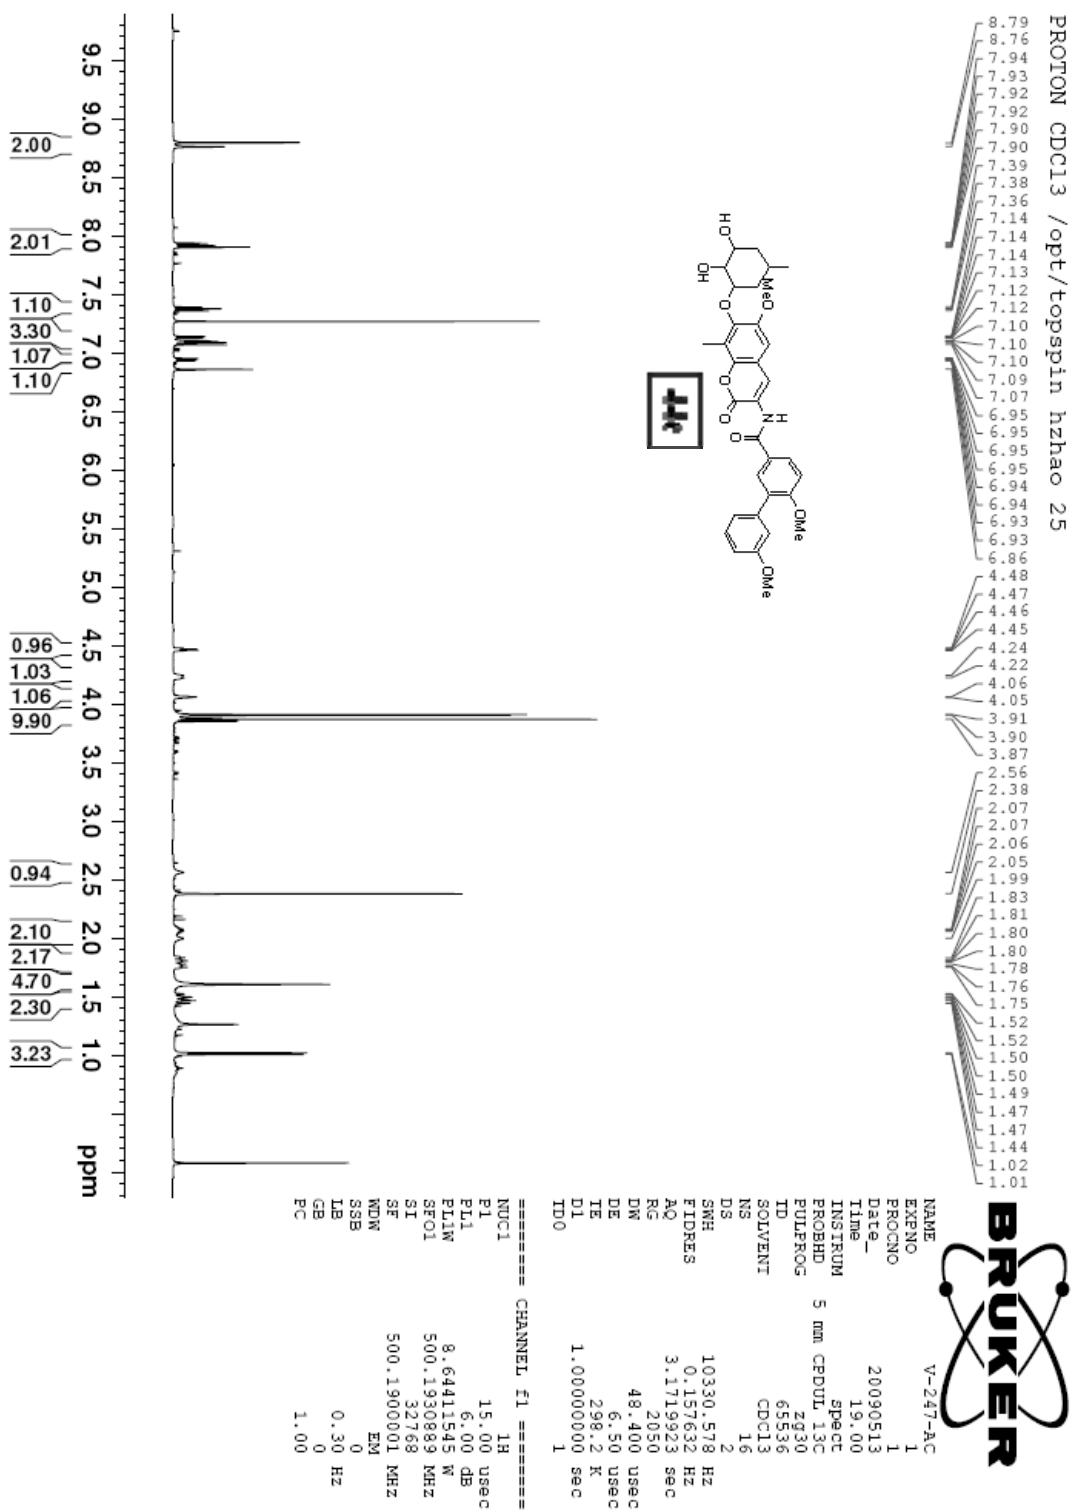

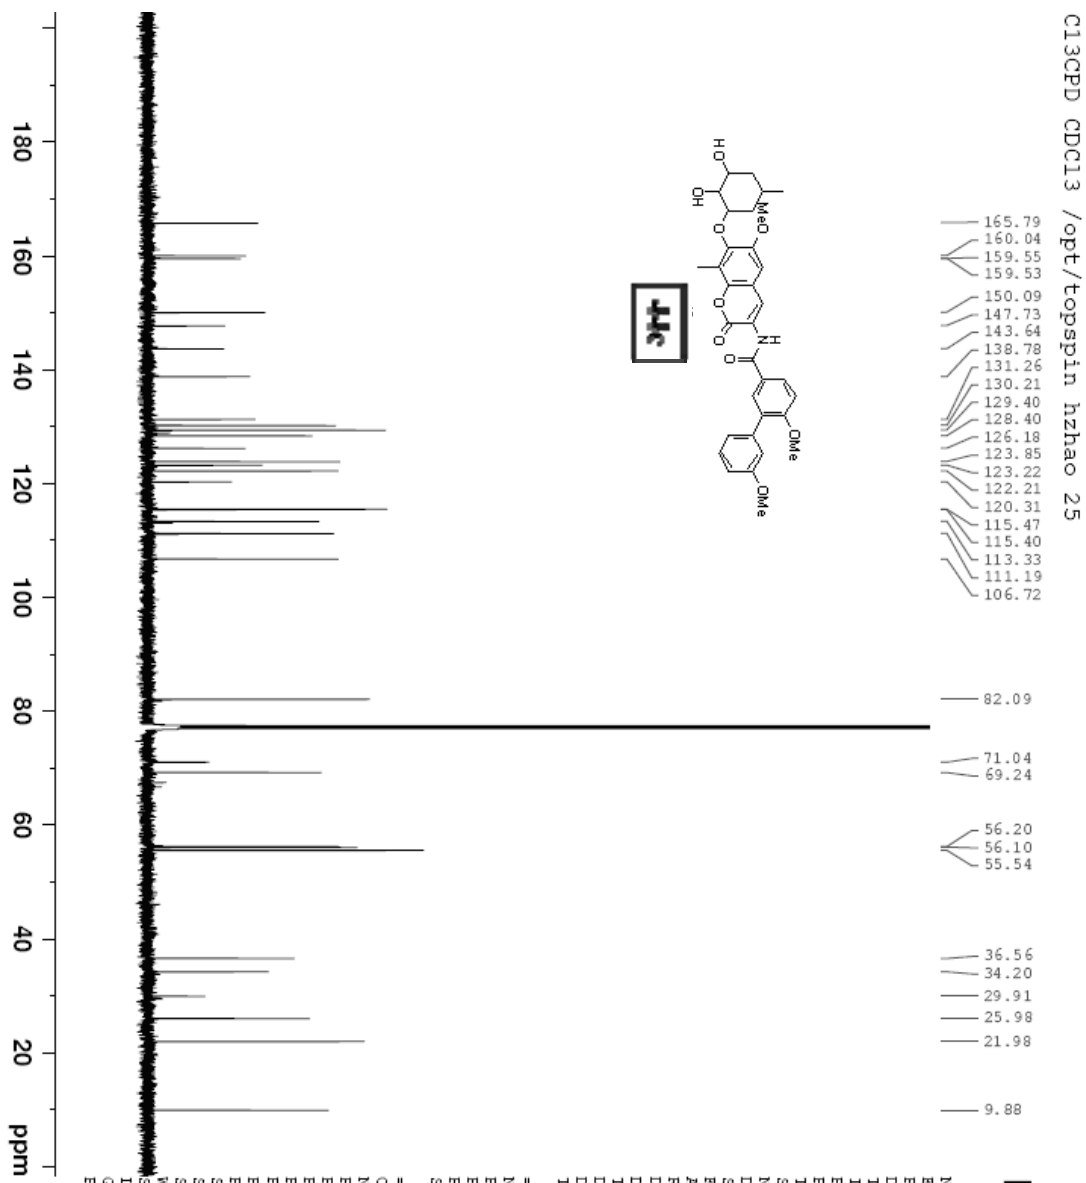

C13CPD CDC13 /opt/topspin hzhao 25

- 165.79
- 160.04
- 159.55
- 159.53
- 150.09
- 147.73
- 143.64
- 138.78
- 131.26
- 130.21
- 129.40
- 128.40
- 126.18
- 123.85
- 123.22
- 122.21
- 120.31
- 115.47
- 115.40
- 113.33
- 111.19
- 106.72

- 82.09
- 71.04
- 69.24

- 56.20
- 56.10
- 55.54

- 36.56
- 34.20
- 29.91
- 25.98
- 21.98

- 9.88

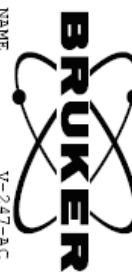

```

NAME          V-247-AC
EXPNO         2
PROCNO        1
Date_         20090513
Time_         19.28
INSTRUM       spect
PROBHD        5 mm CPDUL 13C
PULPROG       zgpg30
TD            65536
SOLVENT       CDC13
NS            1280
DS            4
SWH           29761.904 HZ
FIDRES        0.454131 HZ
AQ            1.1010548 sec
RG            2050
DW            16.800 usec
DE            6.50 usec
TE            298.2 K
D1            0.15000001 sec
D11           0.03000000 sec
TD0           1
    
```

```

===== CHANNEL f1 =====
NUC1          13C
P1            10.00 usec
PL1           3.00 dB
PL1W          53.00075912 W
SFO1          125.7854528 MHz
    
```

```

===== CHANNEL f2 =====
CPDPRG2      waltz16
NUC2          1H
PCPD2        80.00 usec
PL2           6.00 dB
PL12         20.54 dB
PL13         25.00 dB
PL1W          8.64411545 W
PL12W        0.30389285 W
PL13W        0.10882297 W
SFO2          500.1920008 MHz
SI            32768
SF            125.7728499 MHz
NDW           0
SSB           0
LB            1.00 HZ
GB            0
PC            1.40
    
```

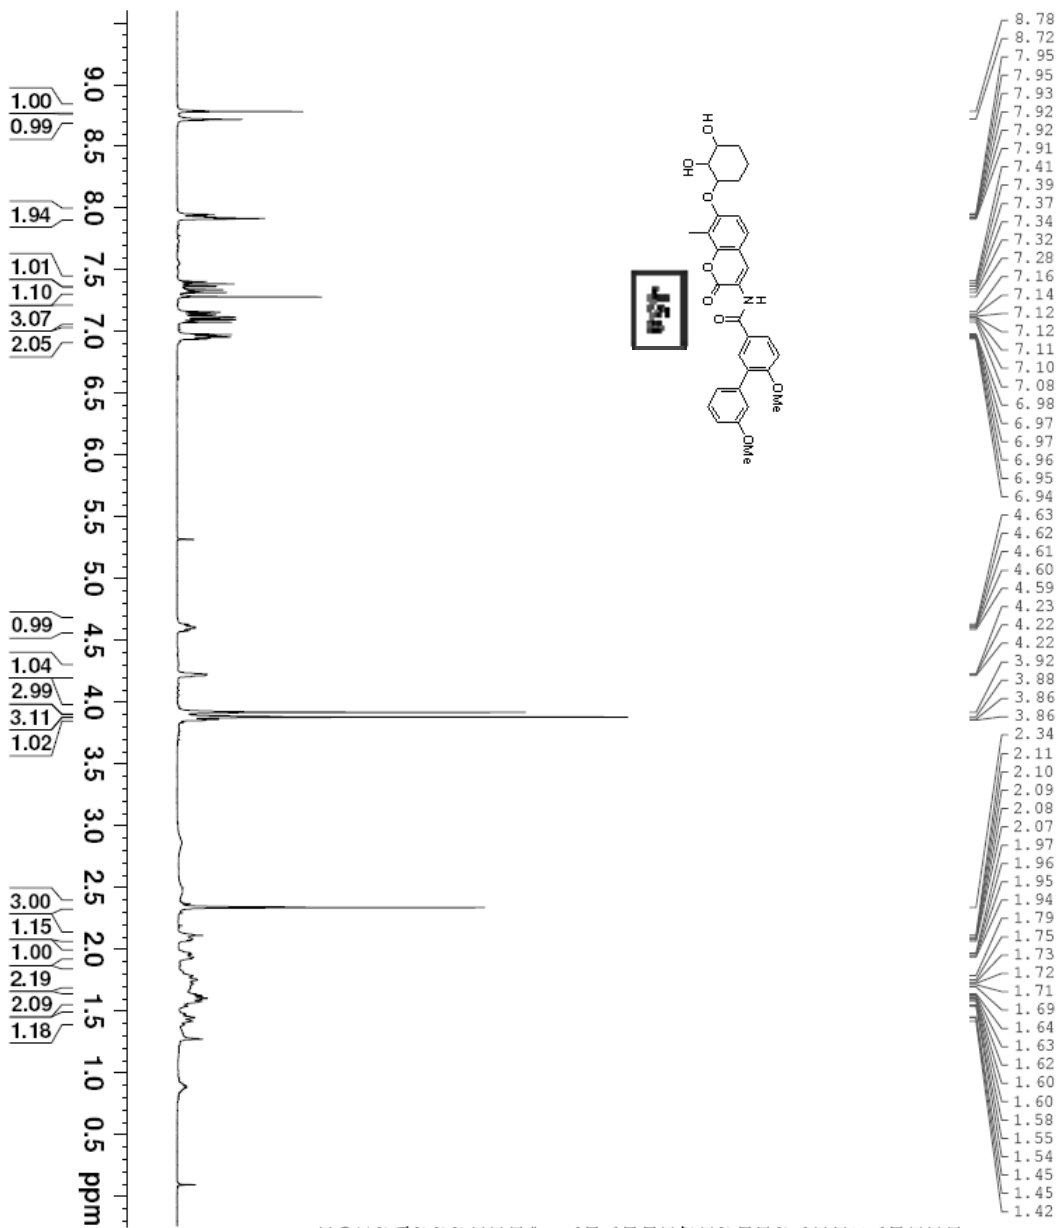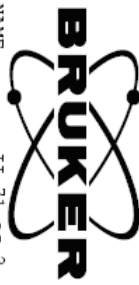

```

NAME      II-71-ac-2
EXPNO     1
PROCNO    1
Date_     20080911
Time      14.45
INSTRUM   dx400
PROBHD    5 mm QNP 1H/13
PULPROG   zg30
TD         65536
SOLVENT   CDCl3
NS         16
DS         2
SWH        8278.146 Hz
FIDRES     0.126314 Hz
AQ         3.9584243 sec
RG         322.5
DE         60.400 usec
TE         294.1 K
D1         1.00000000 sec
TD0        1

===== CHANNEL f1 =====
NUC1       1H
P1         10.50 usec
PL1        -5.00 dB
SFO1       400.1324710 MHz
SI         32768
SF         400.1300000 MHz
WDW        EM
SSB        0
LB         0.30 Hz
GB         0
PC         1.00
    
```

- 8.78
- 8.72
- 7.95
- 7.95
- 7.93
- 7.92
- 7.92
- 7.91
- 7.41
- 7.39
- 7.37
- 7.34
- 7.32
- 7.28
- 7.16
- 7.14
- 7.12
- 7.12
- 7.11
- 7.10
- 7.08
- 6.98
- 6.97
- 6.96
- 6.95
- 6.94
- 4.63
- 4.62
- 4.61
- 4.60
- 4.59
- 4.23
- 4.22
- 4.22
- 3.92
- 3.88
- 3.86
- 3.86
- 2.34
- 2.11
- 2.10
- 2.09
- 2.08
- 2.07
- 1.97
- 1.96
- 1.95
- 1.94
- 1.79
- 1.75
- 1.73
- 1.72
- 1.71
- 1.69
- 1.64
- 1.63
- 1.62
- 1.60
- 1.60
- 1.58
- 1.55
- 1.54
- 1.45
- 1.45
- 1.45
- 1.42

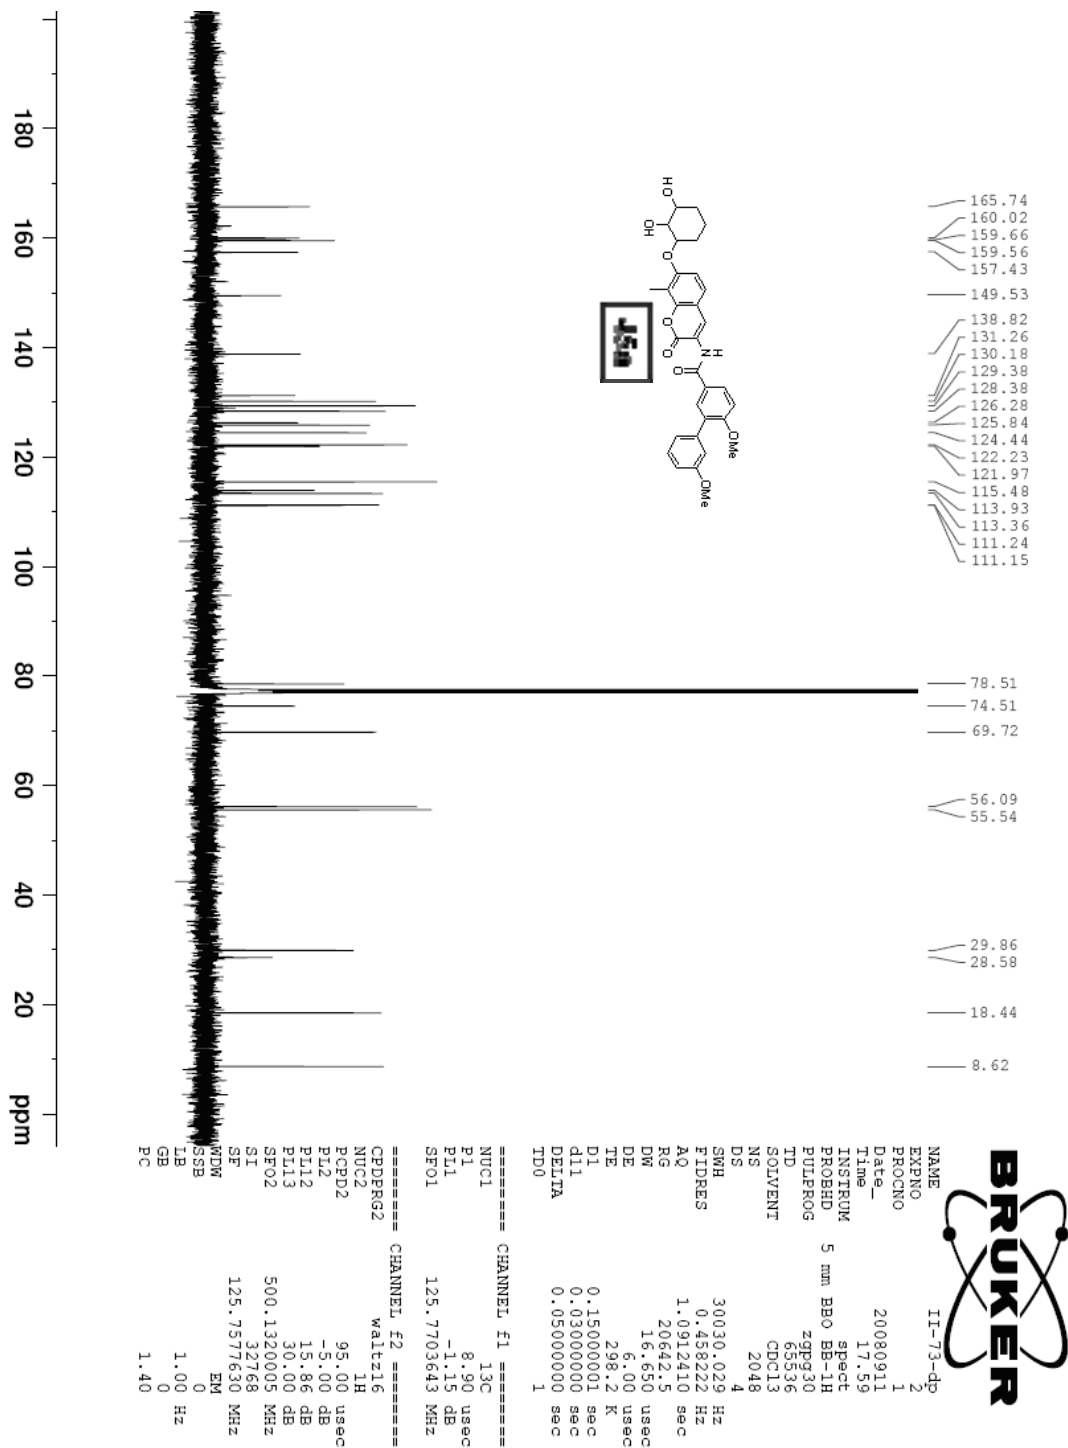



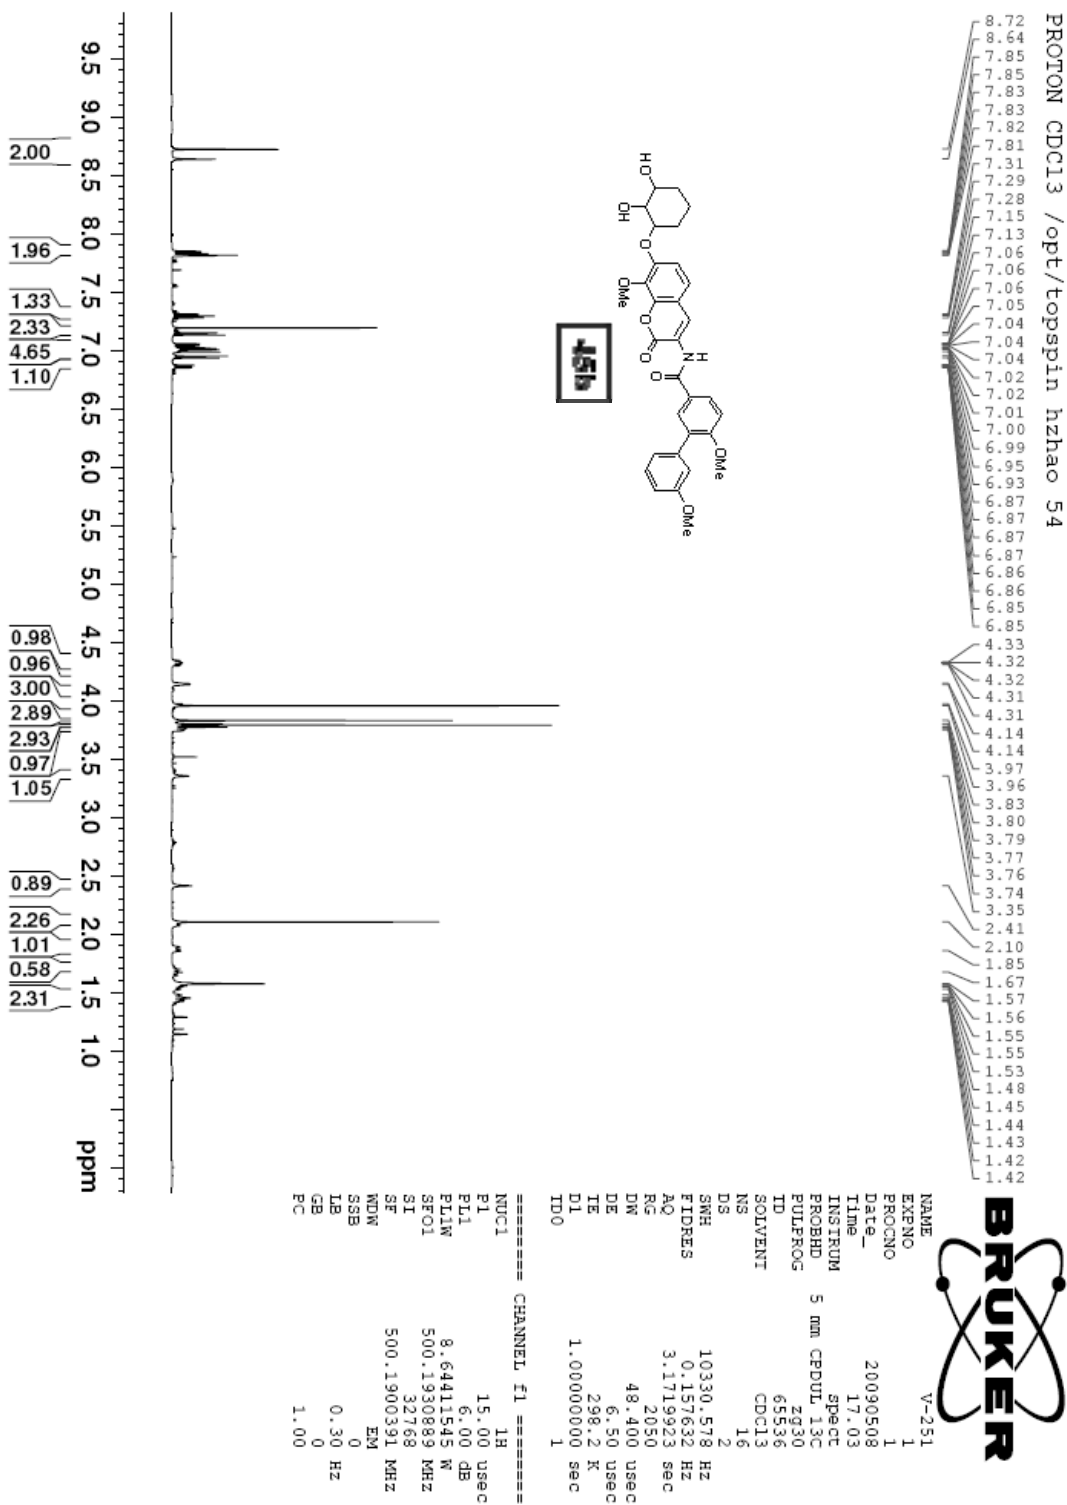

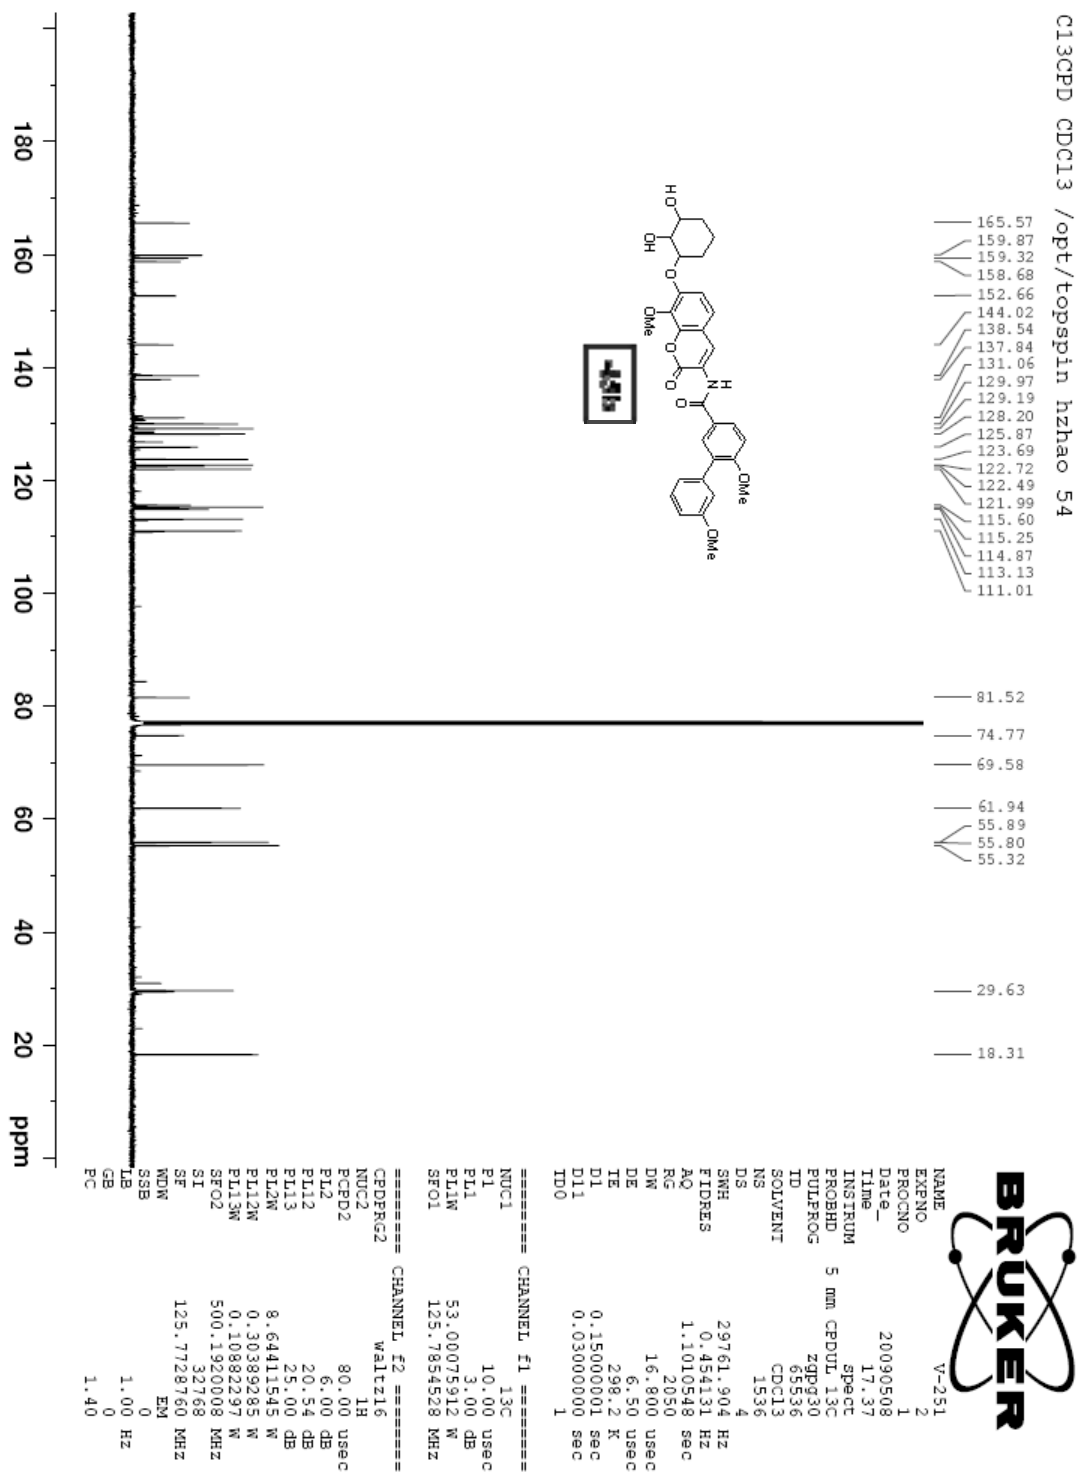

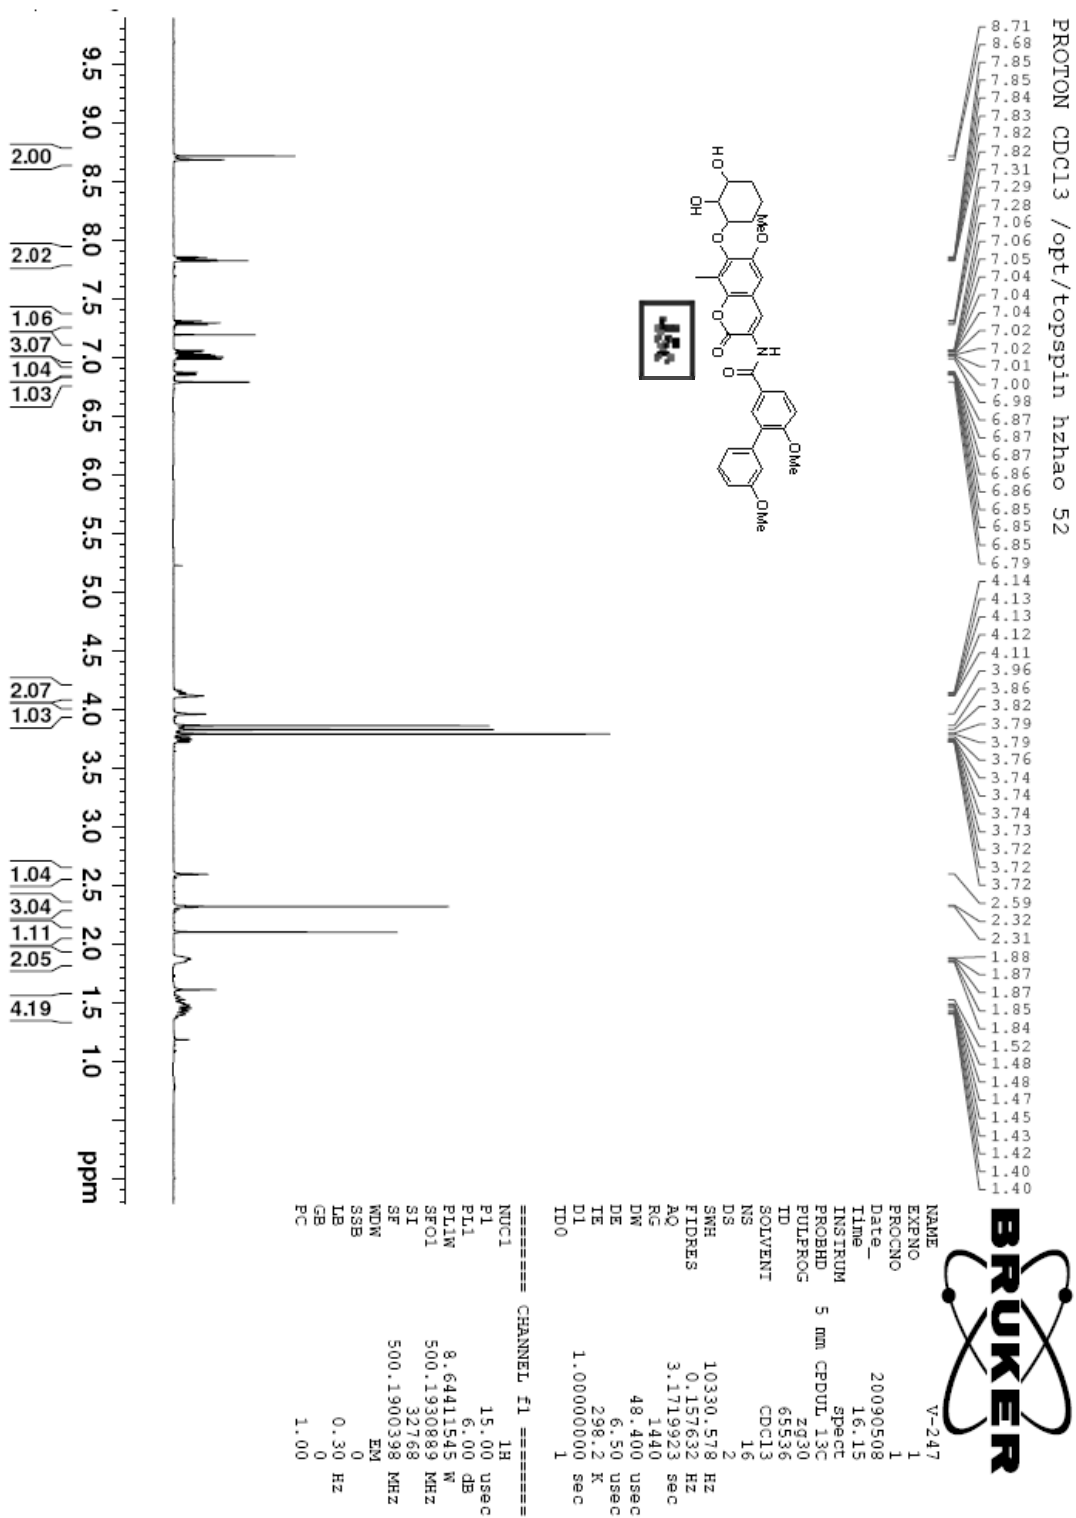

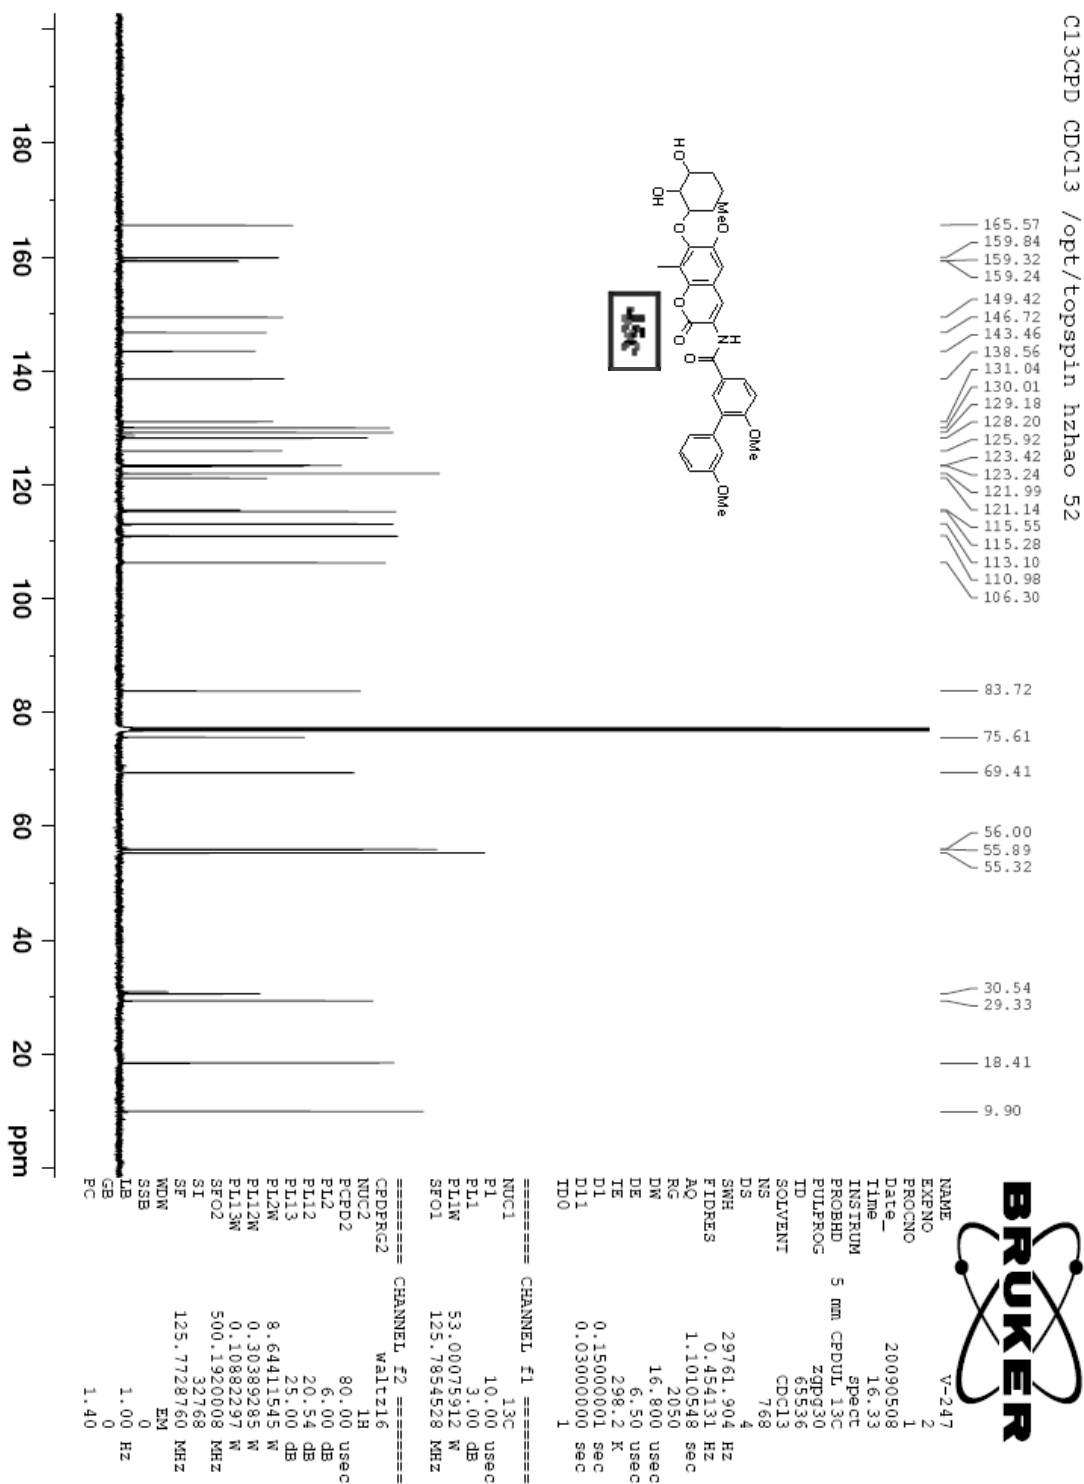

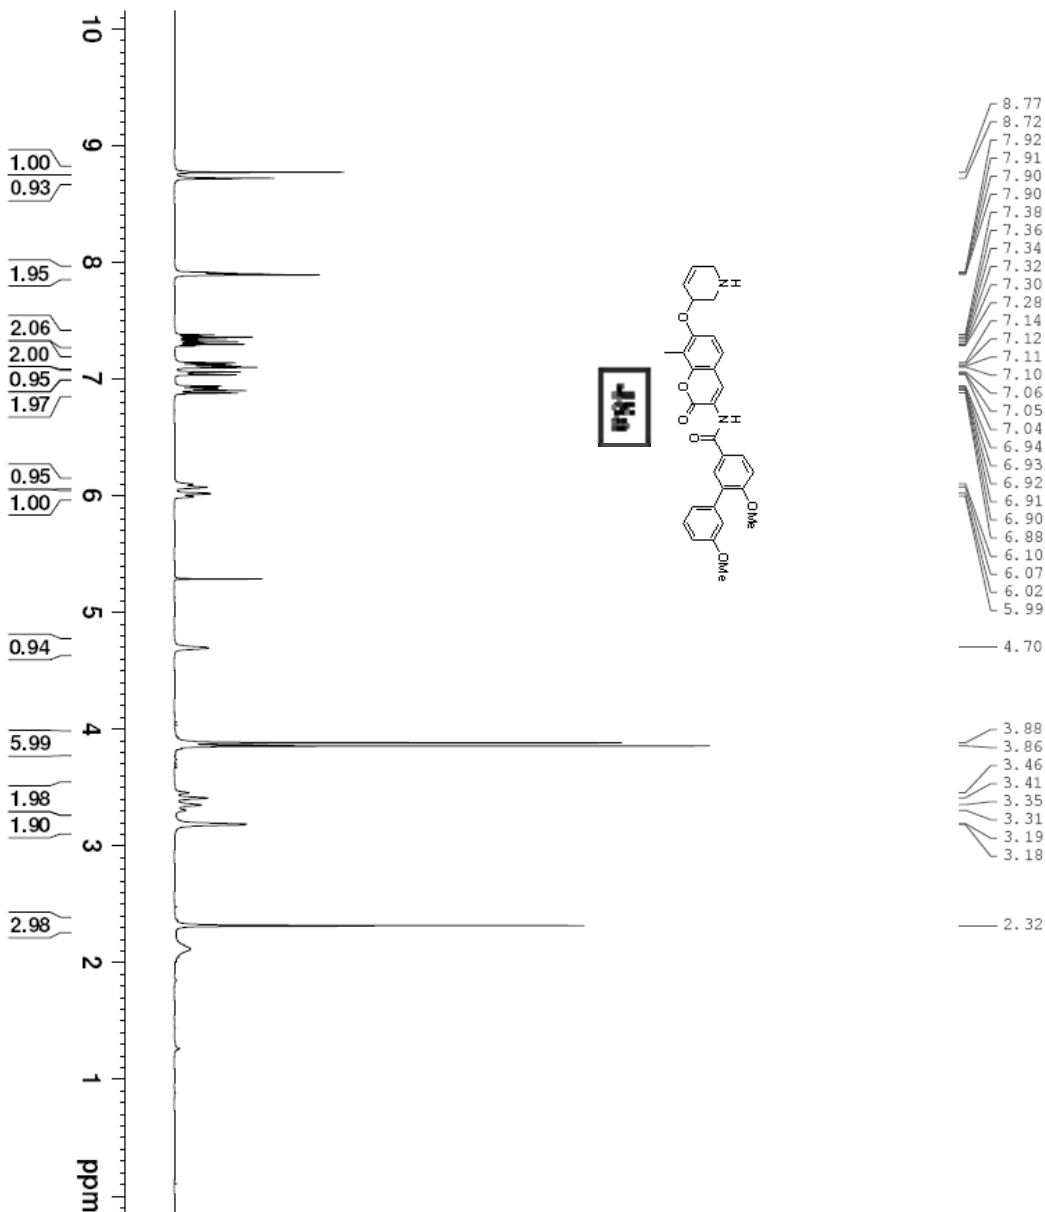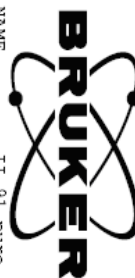

```

NAME      II-91-pure
EXPNO     1
PROCNO    1
Date_     20080909
Time      19.47
INSTRUM   dirx400
PROBHD    5 mm QNP 1H/13
PULPROG   zg30
TD         65536
SOLVENT   CDCl3
NS         16
DS         2
SWH        8278.146 Hz
FIDRES     0.126314 Hz
AQ         3.9584243 sec
RG         57
DE         60.400 usec
TE         294.3 K
D1         1.00000000 sec
TD0        1

===== CHANNEL f1 =====
NUC1       1H
P1         10.50 usec
PL1        -5.00 dB
SFO1       400.1324710 MHz
SI         32768
SF         400.1300000 MHz
WDW        EM
SSB        0
LB         0.30 Hz
GB         0
PC         1.00
    
```

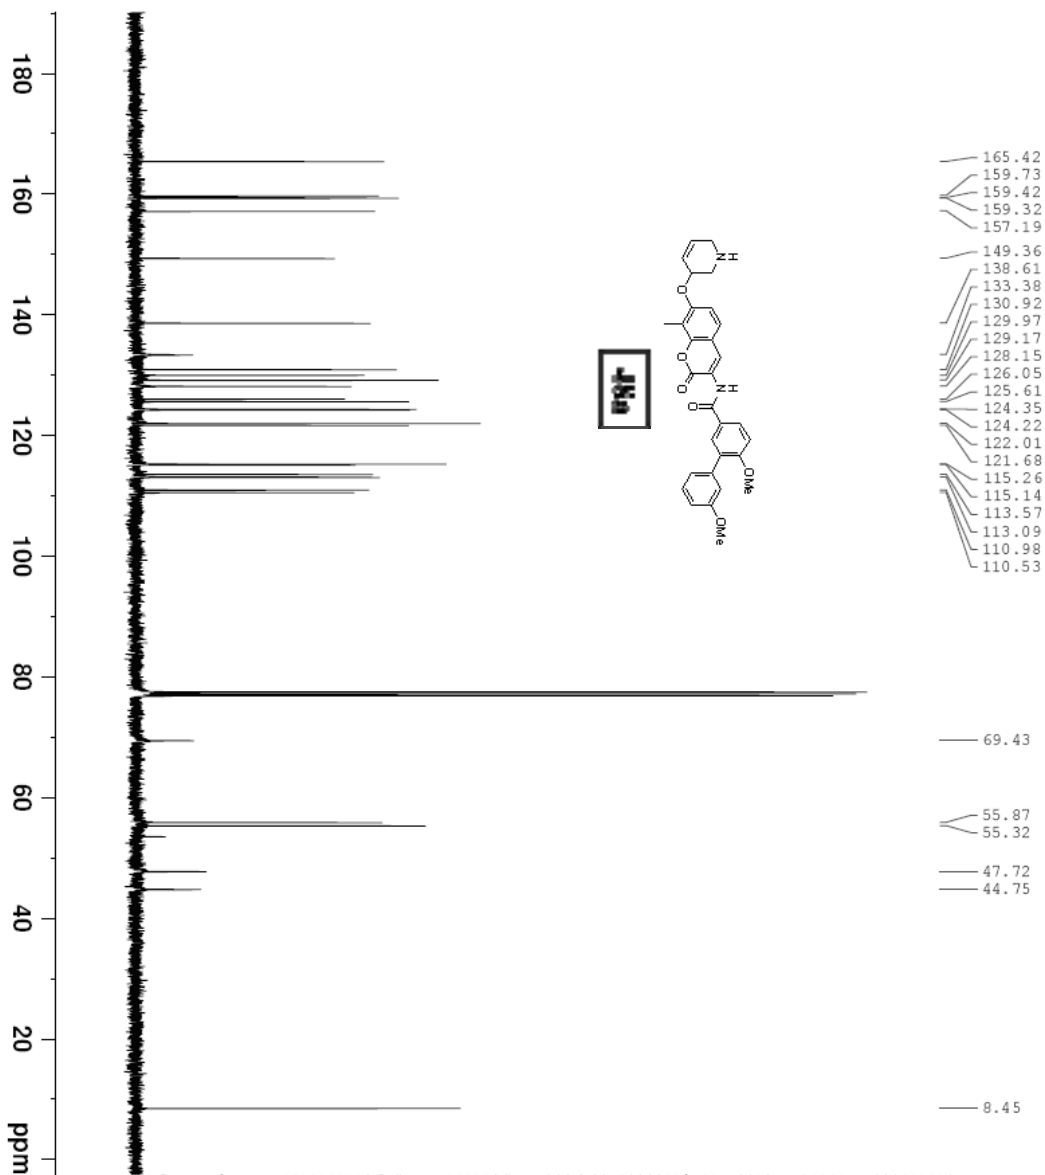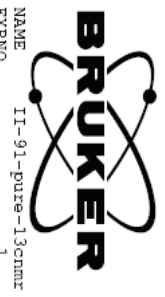

NAME II-91-pure-13cnmr  
 EXPNO 1  
 PROCNO 1  
 Date\_ 20080909  
 Time\_ 20.06  
 INSTRUM dirx400  
 PROBHD 5 mm QNP 1H/13  
 PULPROG zgpg30  
 TD 65536  
 SOLVENT CDCl3  
 NS 256  
 DS 4  
 SWH 23980.814 Hz  
 FIDRES 0.368918 Hz  
 AQ 1.3664756 sec  
 RG 32768  
 DW 20.850 usec  
 DE 6.00 usec  
 TE 294.4 K  
 D1 2.00000000 sec  
 d11 0.03000000 sec  
 DELTA 1.89999998 sec  
 TD0 1

===== CHANNEL f1 =====  
 NUC1 13C  
 P1 9.85 usec  
 PL1 -2.00 dB  
 SFO1 100.6228298 MHz

===== CHANNEL f2 =====  
 CDDPRG2 waltz16  
 NUC2 1H  
 P2 100.00 usec  
 PL2 -3.00 dB  
 PL12 14.58 dB  
 PL13 16.00 dB  
 SFO2 400.1316005 MHz  
 SI 32768  
 SF 100.6127690 MHz  
 WDW EM  
 SSB 0  
 LB 1.00 Hz  
 GB 0  
 PC 1.40

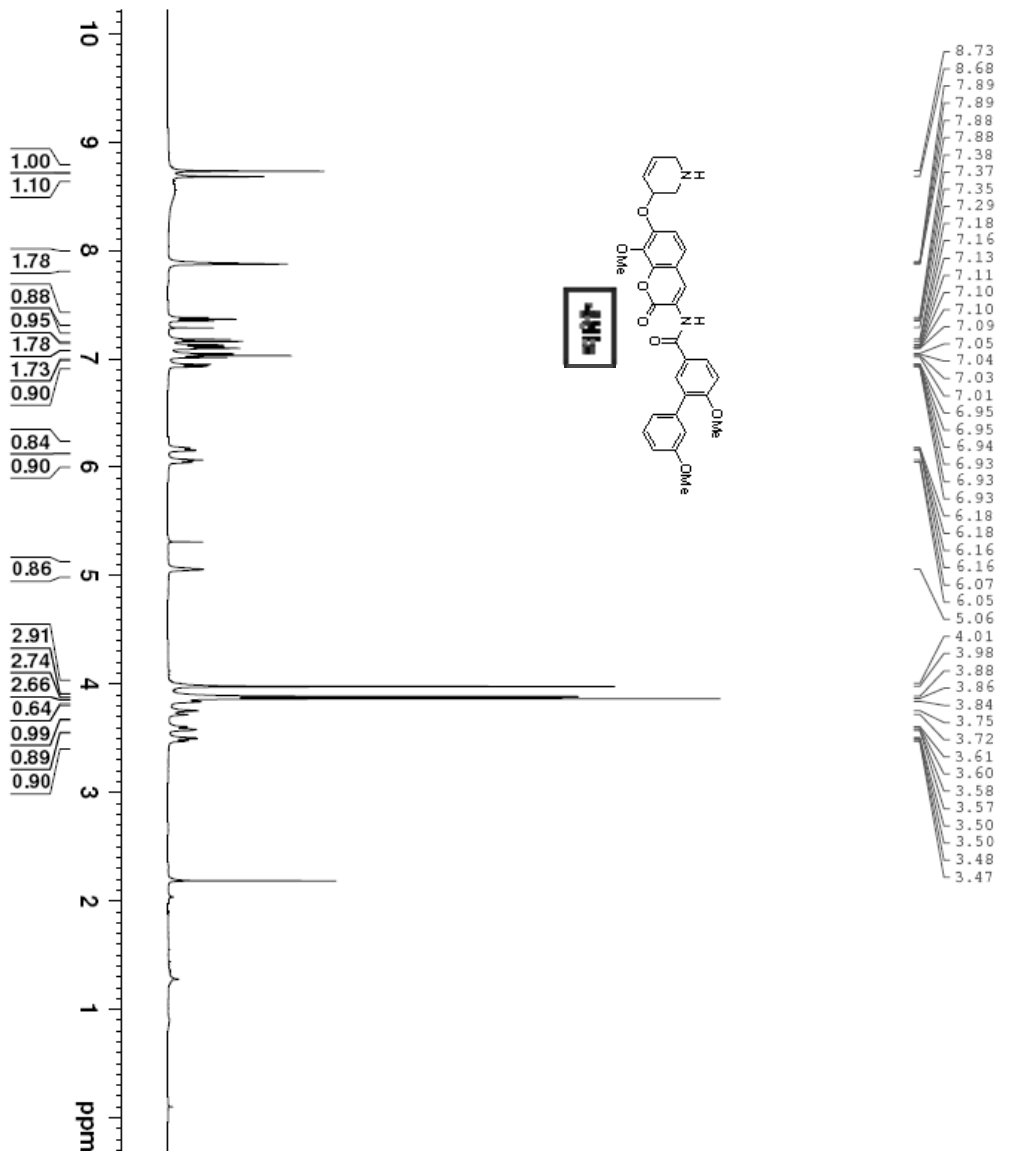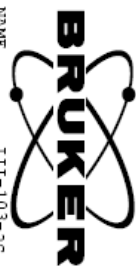

```

NAME      III-103-ac
EXPNO     2
PROCNO    1
Date_     20081212
Time      20.35
INSTRUM   spect
PROBHD    5 mm BBO BB-1H
PULPROG   zg30
TD        65536
FIDRES    0.157632 Hz
AQ        3.1720407 sec
RG        80.6
DM        48.400 usec
DE        6.00 usec
TE        298.2 K
D1        1.00000000 sec
TD0       1

===== CHANNEL f1 =====
NUC1      1H
P1        8.60 usec
PL1       -5.00 dB
SFO1     500.1330885 MHz
SI        32768
SF        500.1300000 MHz
WDW       EM
SSB       0
LB        0.30 Hz
GB        0
PC        1.00
    
```

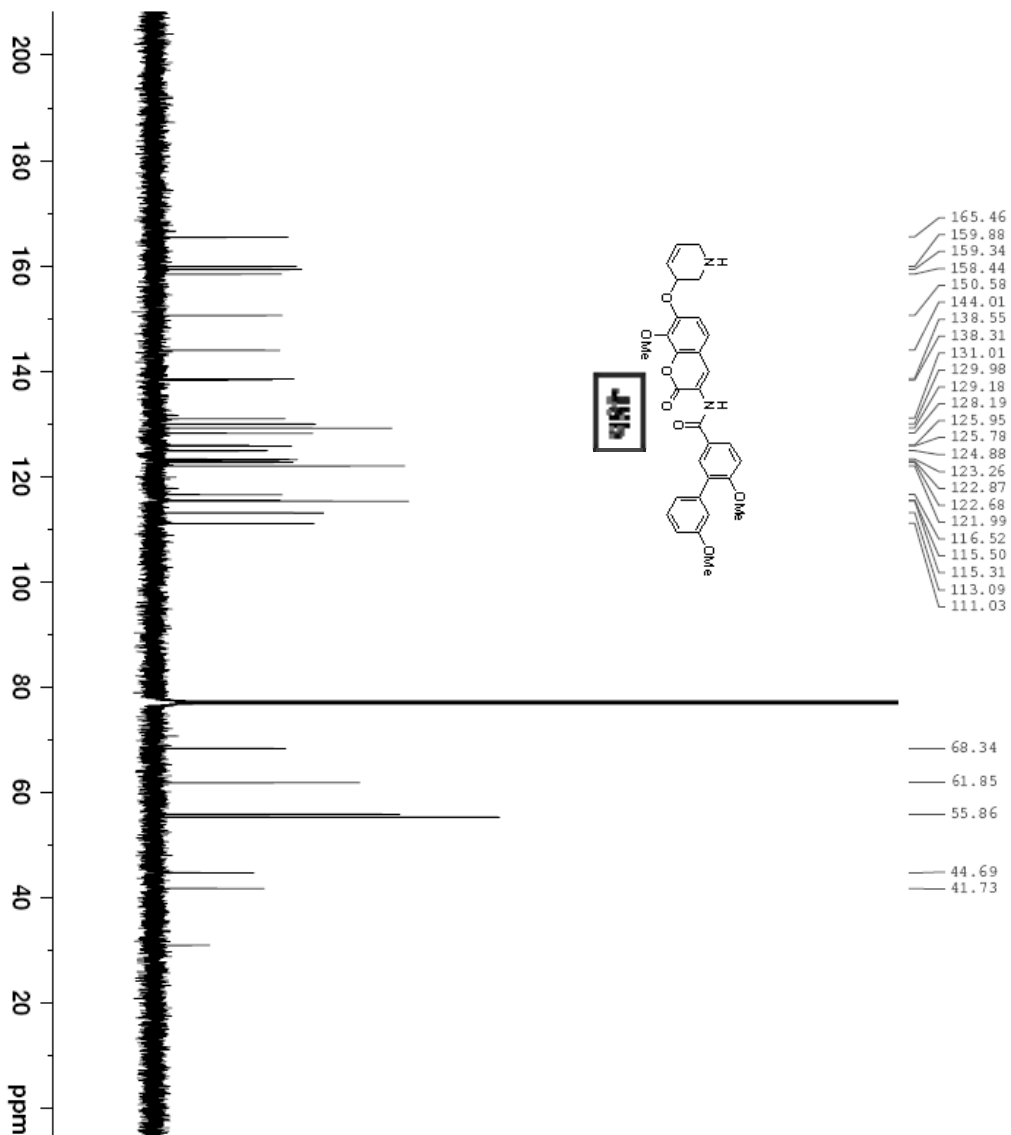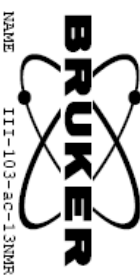

```

NAME III-103-ac-13NMH
EXNO 1
PROCNO 2
Date_ 20081212
Time 21.34
INSTRUM spect
PROBHD 5 mm BBO BB-1H
PULPROG zgpg30
TD 65536
SOLVENT CDCl3
NS 578
DS 4
SWH 30030.029 Hz
FIDRES 0.458222 Hz
AQ 1.0912410 sec
RG 32768
DE 16.650 usec
TE 298.2 K
D1 1.00000000 sec
d11 0.03000000 sec
DELTA 0.89399998 sec
ID0 2

===== CHANNEL F1 =====
NUC1 13C
P1 8.90 usec
PL1 -1.15 dB
SFO1 125.7703643 MHz

===== CHANNEL F2 =====
CPDPRG2 waltz16
NUC2 1H
PCPD2 95.00 usec
PL12 -5.00 dB
PL13 15.86 dB
SFO2 500.1320005 MHz
SI 32768
SF 125.7577890 MHz
WDW EM
SSB 0
LB 1.00 Hz
GB 0
PC 1.40
    
```



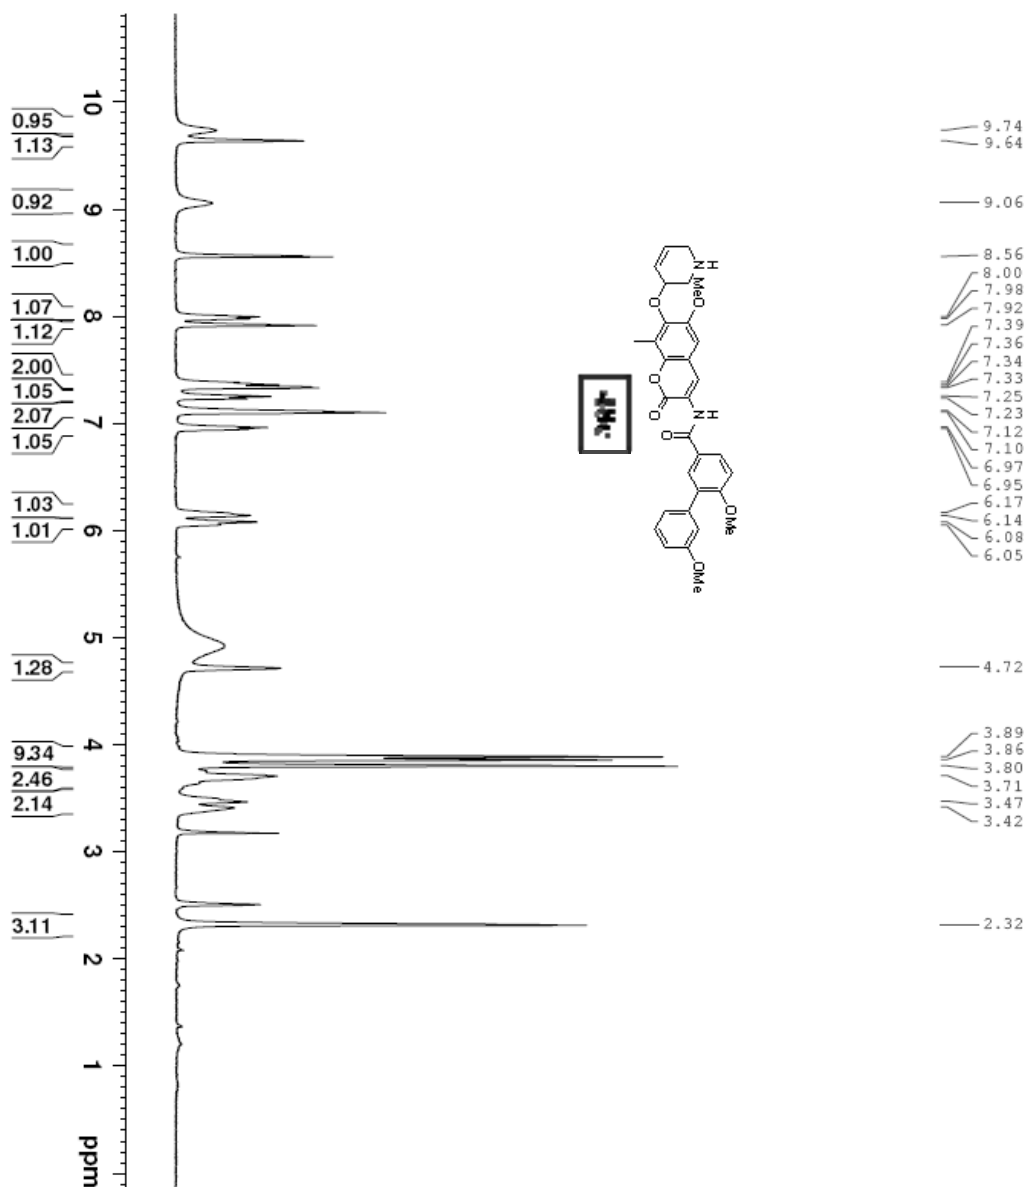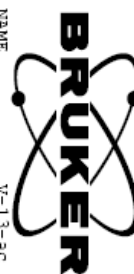

```

NAME          V-13-ac
EXPNO         1
PROCNO        1
Date_         20090207
Time         19.56
INSTRUM       dx400
PROBHD        5 mm QNP 1H/13
PULPROG       zgpg30
TD            65536
SOLVENT       DMSO
NS            16
DS            2
SWH           8278.146 HZ
FIDRES       0.126314 HZ
AQ           3.9584243 Sec
RG           4
DW           60.400 usec
DE           6.00 usec
TE           294.5 K
D1           1.00000000 sec
TD0          1

===== CHANNEL f1 =====
NUC1          13C
P1           10.50 usec
PL1          -5.00 dB
SFO1         400.1324710 MHz
SI           32768
SF           400.1300000 MHz
WDW          EM
SSB          0
LB           0.30 Hz
GB           0
PC           1.00
    
```

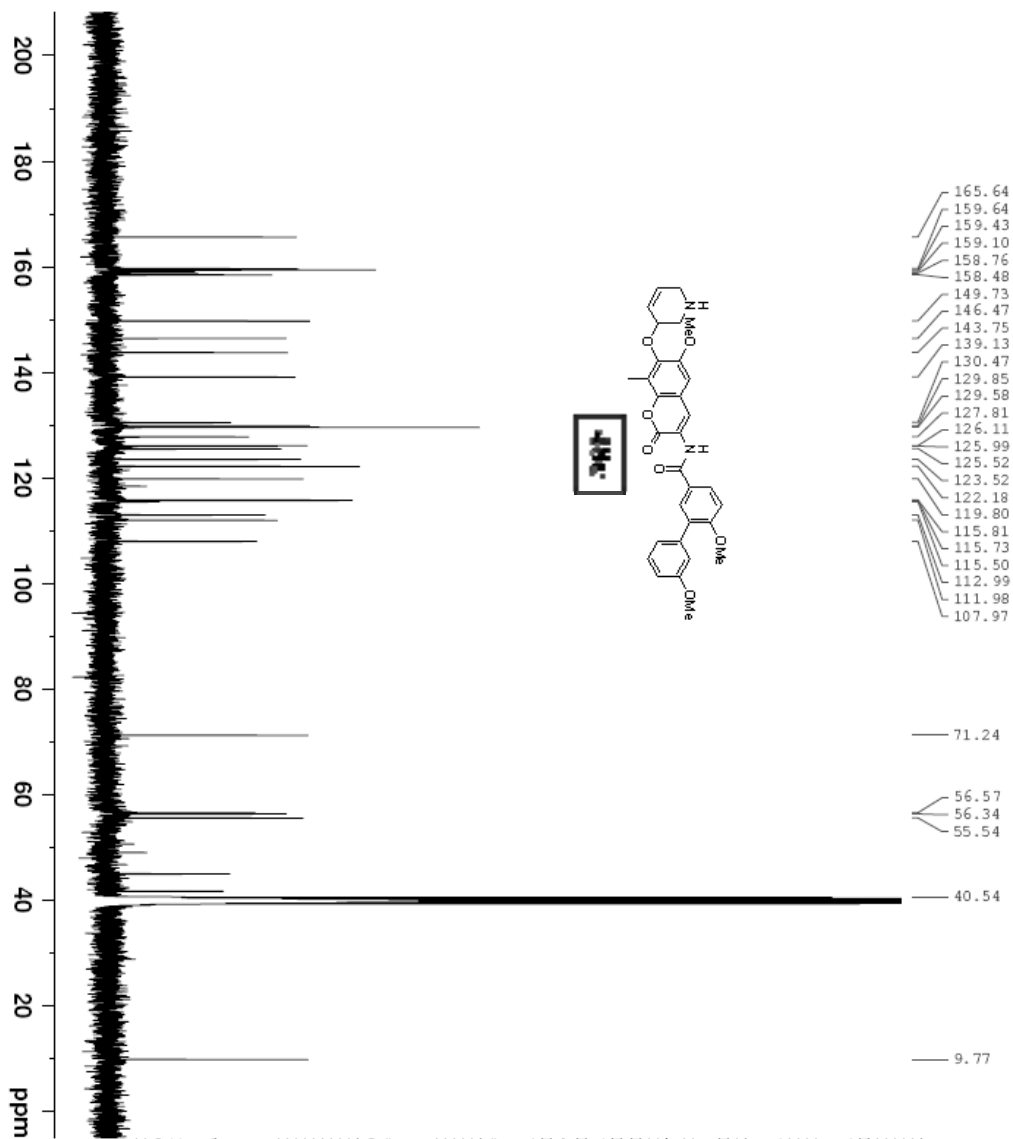

- 165.64
- 159.64
- 159.43
- 159.10
- 158.76
- 158.48
- 149.73
- 146.47
- 143.75
- 139.13
- 130.47
- 129.85
- 129.58
- 127.81
- 126.11
- 125.99
- 125.52
- 123.52
- 122.18
- 119.80
- 115.81
- 115.73
- 115.50
- 112.99
- 111.98
- 107.97

- 71.24
- 56.57
- 56.34
- 55.54
- 40.54
- 9.77

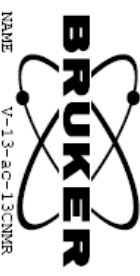

```

NAME V-13-ac-13CNMR
EXPNO 1
PROCNO 1
Date_ 20090207
Time 20.02
INSTRUM dx400
PROBHD 5 mm QNP 1H/13
PULPROG zgpg30
TD 65536
SOLVENT DMSO
NS 1024
DS 4
SWH 23980.814 Hz
FIDRES 0.365918 Hz
AQ 1.3664756 sec
RG 32768
DM 20.850 usec
DE 6.00 usec
TE 294.6 K
D1 2.00000000 sec
d11 0.03000000 sec
DELTA 1.89999998 sec
ID0 1
    
```

```

===== CHANNEL f1 =====
NUC1 13C
P1 9.85 usec
PL1 -2.00 dB
SFO1 100.6228298 MHz
    
```

```

===== CHANNEL f2 =====
CPDPRG2 waltz16
NUC2 1H
PCPD2 100.00 usec
PL2 -5.00 dB
PL12 14.58 dB
PL13 16.00 dB
SFO2 400.1316005 MHz
SI 32768
SF 100.6127690 MHz
WDW EM
SSB 0
LB 1.00 Hz
GB 0
PC 1.40
    
```

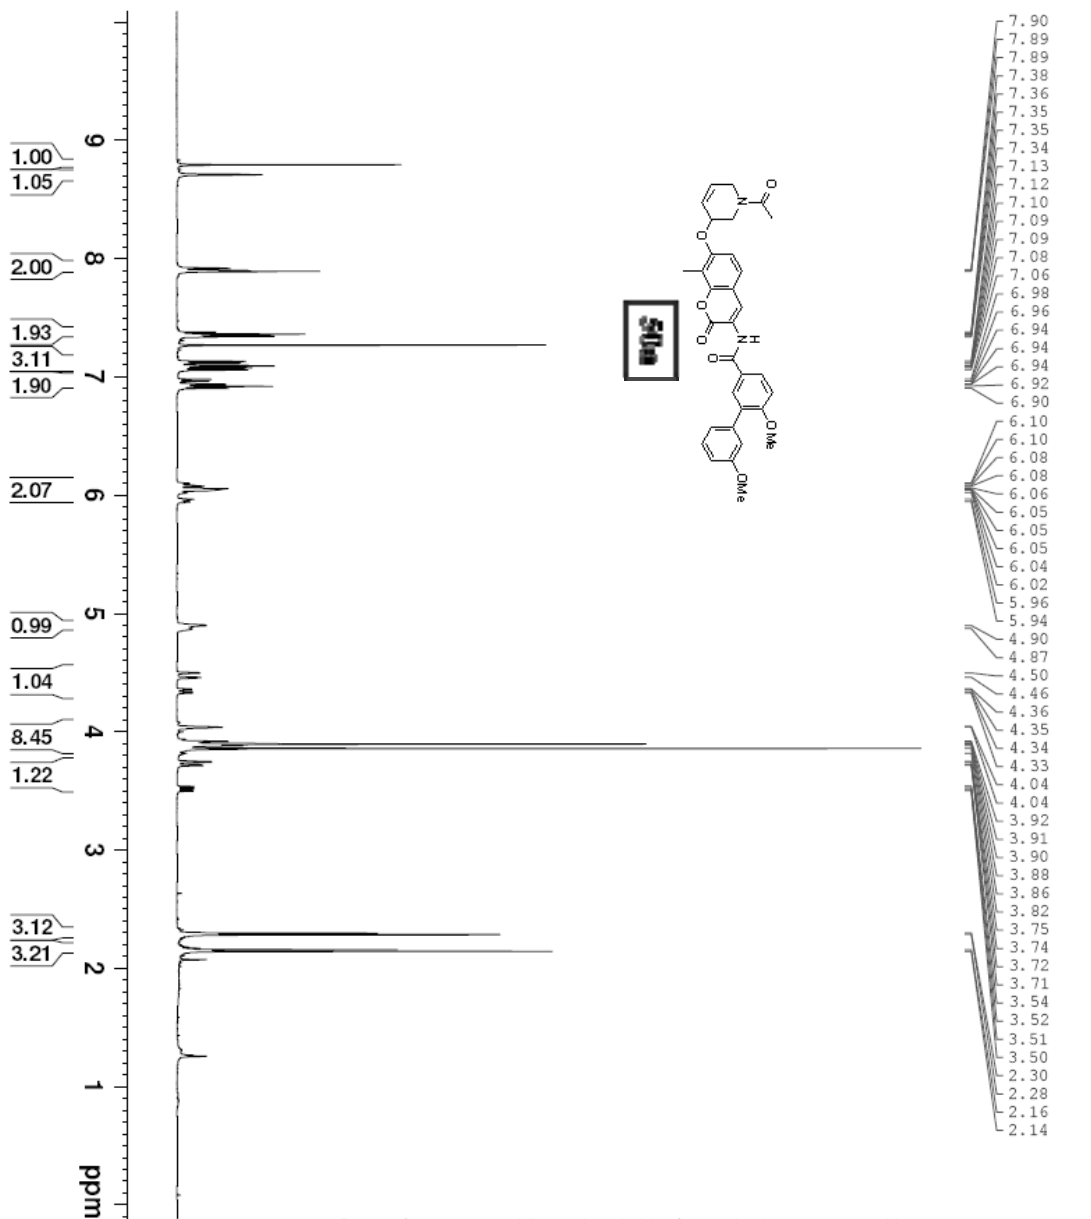

**BRUKER**  
 NAME II-103-ag  
 EXPNO 2  
 PROCNO 1  
 Date\_ 20080910  
 Time 17.06  
 INSTRUM spect  
 PROBHD BB-1H  
 PULPROG zg30  
 TD 65536  
 SOLVENT CDCl3  
 NS 16  
 DS 2  
 SWH 10330.578 Hz  
 FIDRES 0.157632 Hz  
 AQ 3.1720407 sec  
 RG 90.5  
 DW 48.400 usec  
 DE 6.00 usec  
 TE 297.2 K  
 D1 1.00000000 sec  
 TD0 1

===== CHANNEL f1 =====  
 NUC1 1H  
 P1 8.60 usec  
 PL1 -5.00 dB  
 SFO1 500.1330885 MHz  
 SI 32768  
 SF 500.130075 MHz  
 WDW EM  
 SSB 0  
 LB 0.30 Hz  
 GB 0  
 PC 1.00

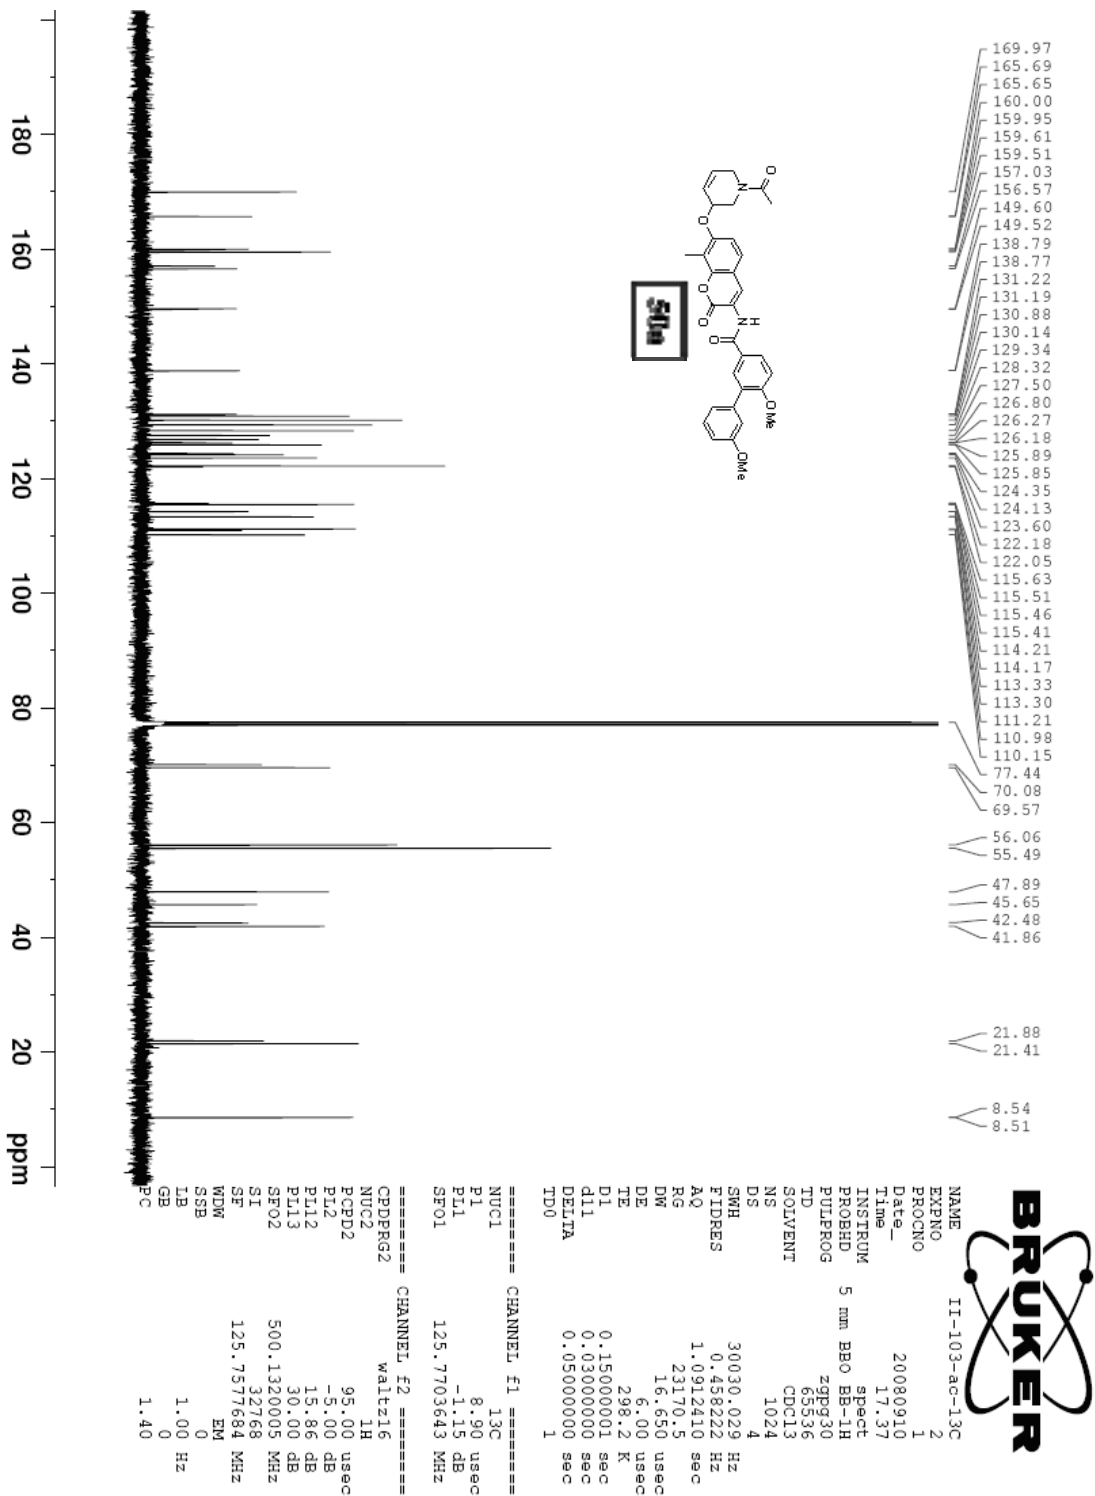

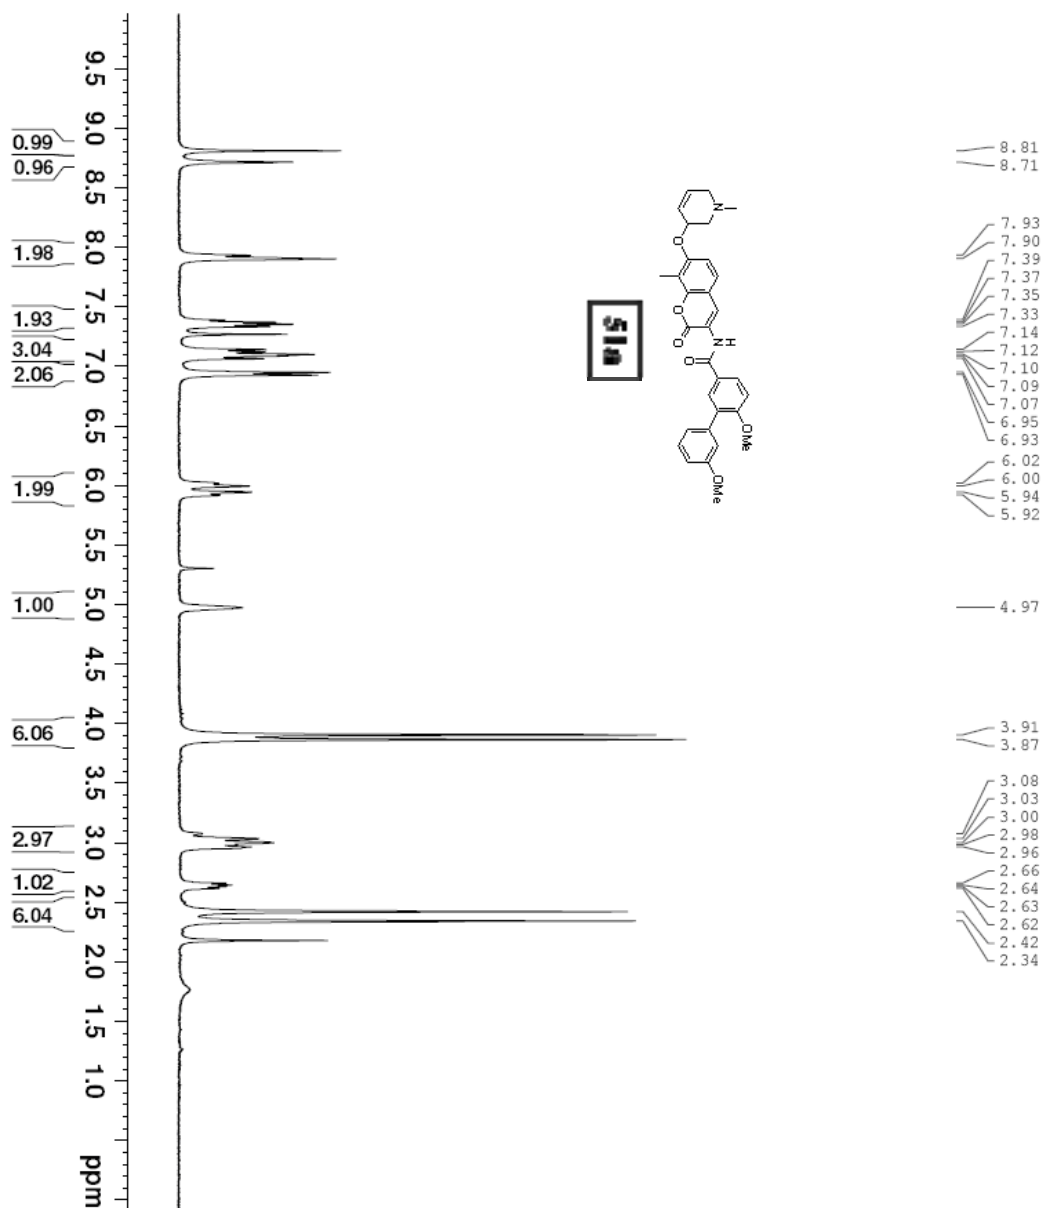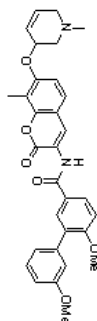

**51a**

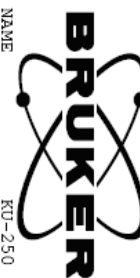

```

NAME          RU-250
EXPNO         1
PROCNO        1
Date_         20081108
Time_         21.22
INSTRUM       dx400
PROBHD        5 mm QNP 1H/13
PULPROG       zg30
TD            65536
FIDRES        0.126314 Hz
AQ            3.9584243 sec
RG            4
DW            60.400 usec
DE            6.00 usec
TE            295.9 K
D1            1.00000000 sec
TD0           1

===== CHANNEL f1 =====
NUC1          1H
P1            10.50 usec
PL            -5.00 dB
SFO1          400.1324710 MHz
SI            32768
SF            400.1300059 MHz
WDW           EM
SSB           0
LB            0.30 Hz
GB            0
PC            1.00
    
```

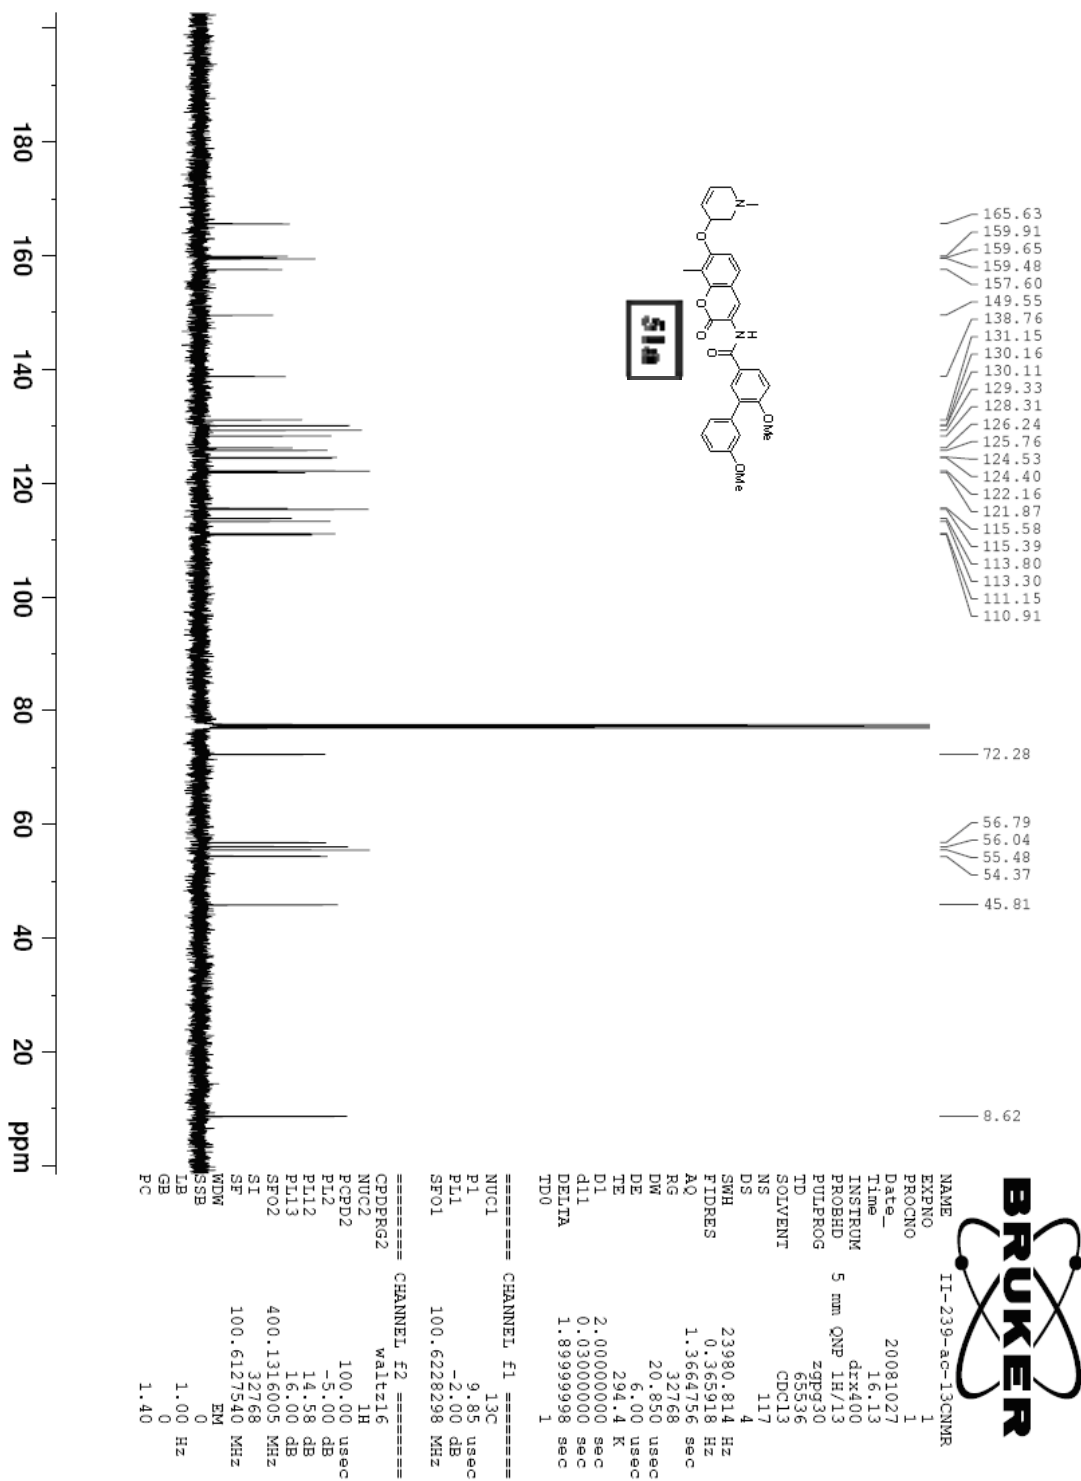

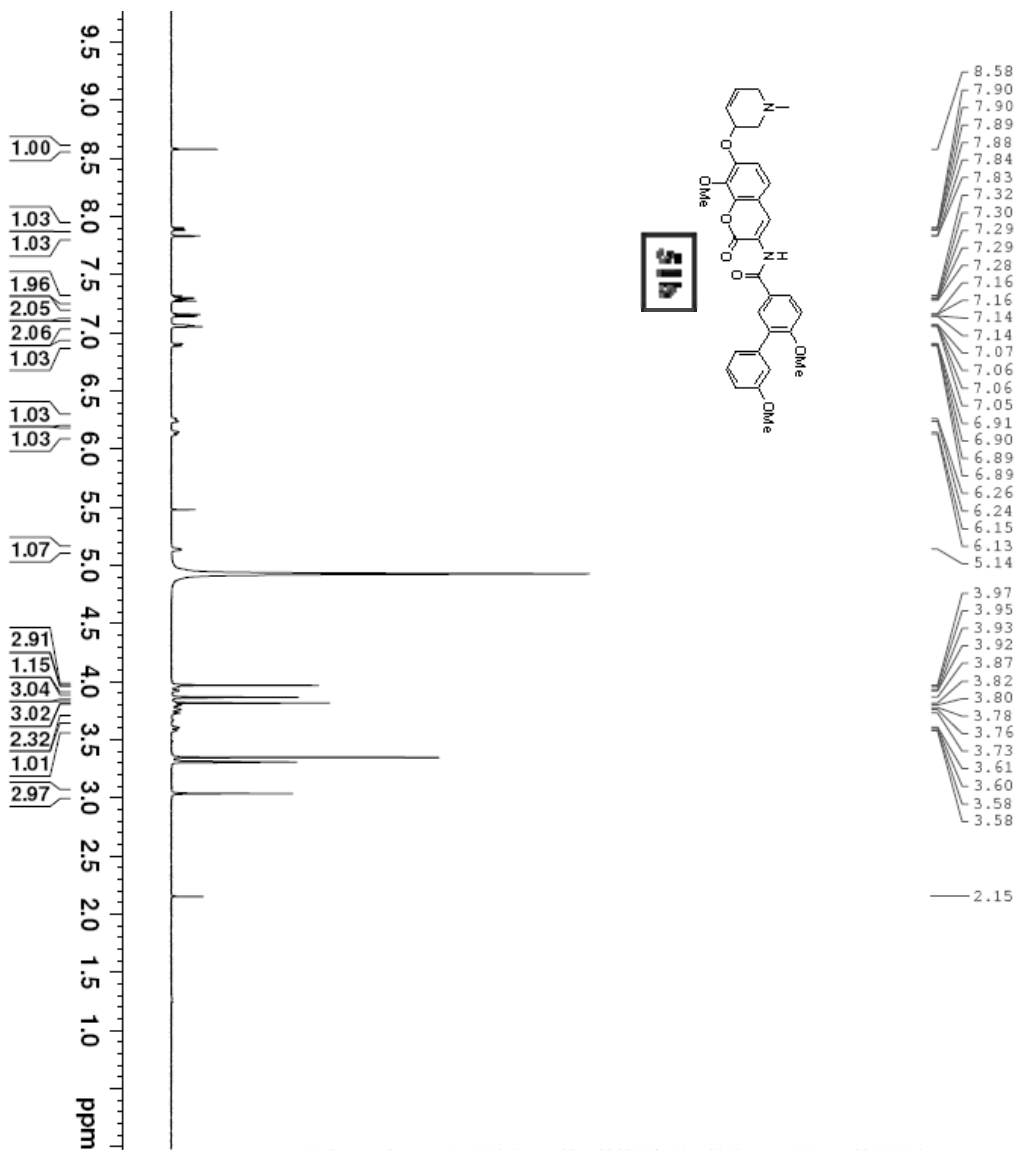

**BRUKER**  
 V--59-ac  
 NAME  
 EXPNO 2  
 PROCNO 1  
 Date\_ 20090216  
 Time 11.53  
 INSTRUM spect  
 PROBHD 5 mm BBO BB-1H  
 PULPROG zg30  
 TD 65536  
 ID MeOD  
 SOLVENT MeOD  
 NS 16  
 DS 2  
 SWH 10330.578 Hz  
 FIDRES 0.157632 Hz  
 AQ 3.1720407 sec  
 RG 4  
 DW 48.400 usec  
 DE 6.00 usec  
 TE 296.2 K  
 D1 1.00000000 sec  
 ID0 1

===== CHANNEL f1 =====  
 NUC1 1H  
 P1 8.60 usec  
 PL1 -5.00 dB  
 SFO1 500.1350885 MHz  
 SI 32768  
 SF 500.1300104 MHz  
 WDW EM  
 SSB 0  
 GB 0  
 PC 1.00

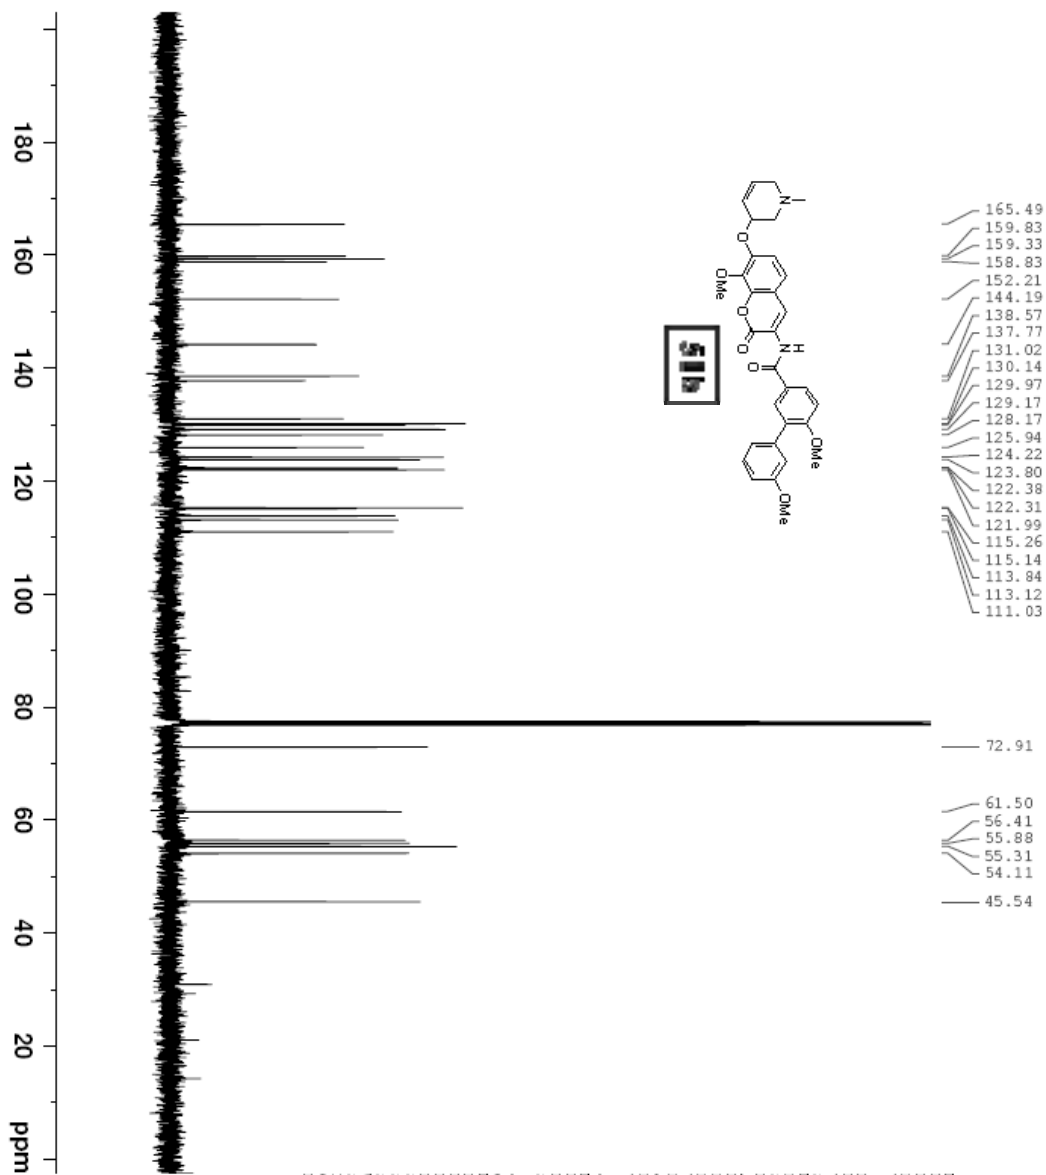

- 165.49
- 159.83
- 159.33
- 158.83
- 152.21
- 144.19
- 138.57
- 137.77
- 131.02
- 130.14
- 129.97
- 129.17
- 128.17
- 125.94
- 124.22
- 123.80
- 122.38
- 122.31
- 121.99
- 115.26
- 115.14
- 113.84
- 113.12
- 111.03

- 72.91
- 61.50
- 56.41
- 55.88
- 55.31
- 54.11
- 45.54

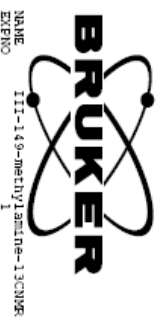

```

NAME III-149-methylamine-13C13MR
EXPNO 1
PROCNO 1
DATE_ 20091230
TIME 13:40
INSTRUM spect
PROBHD 5 mm QNP 1H/13
PULPROG zgpg30
TD 65536
SOLVENT CDCl3
NS 148
DS 4
SMH 23960.814 Hz
FIDRES 0.365918 Hz
AQ 1.3654756 sec
RG 32.856
AQ 27.850 usec
DM 26.00 usec
DE 26.7 X
TE 300.2 K
D1 2.00000000 sec
d11 0.03000000 sec
DELTA 1.88999998 sec
ID0 2

----- CHANNEL f1 -----
NUC1 13C
P1 13C
SFO1 100.628258 MHz

----- CHANNEL f2 -----
NAME1316
NUC2 1H
PCPD2 100.00 usec
PL2 -5.00 dB
PL12 14.58 dB
PL13 16.00 dB
SEF02 400.1316005 MHz
SI 100.6127650 MHz
WDW EM
SSB 0
LB 1.00 Hz
GB 0
PC 1.40
    
```



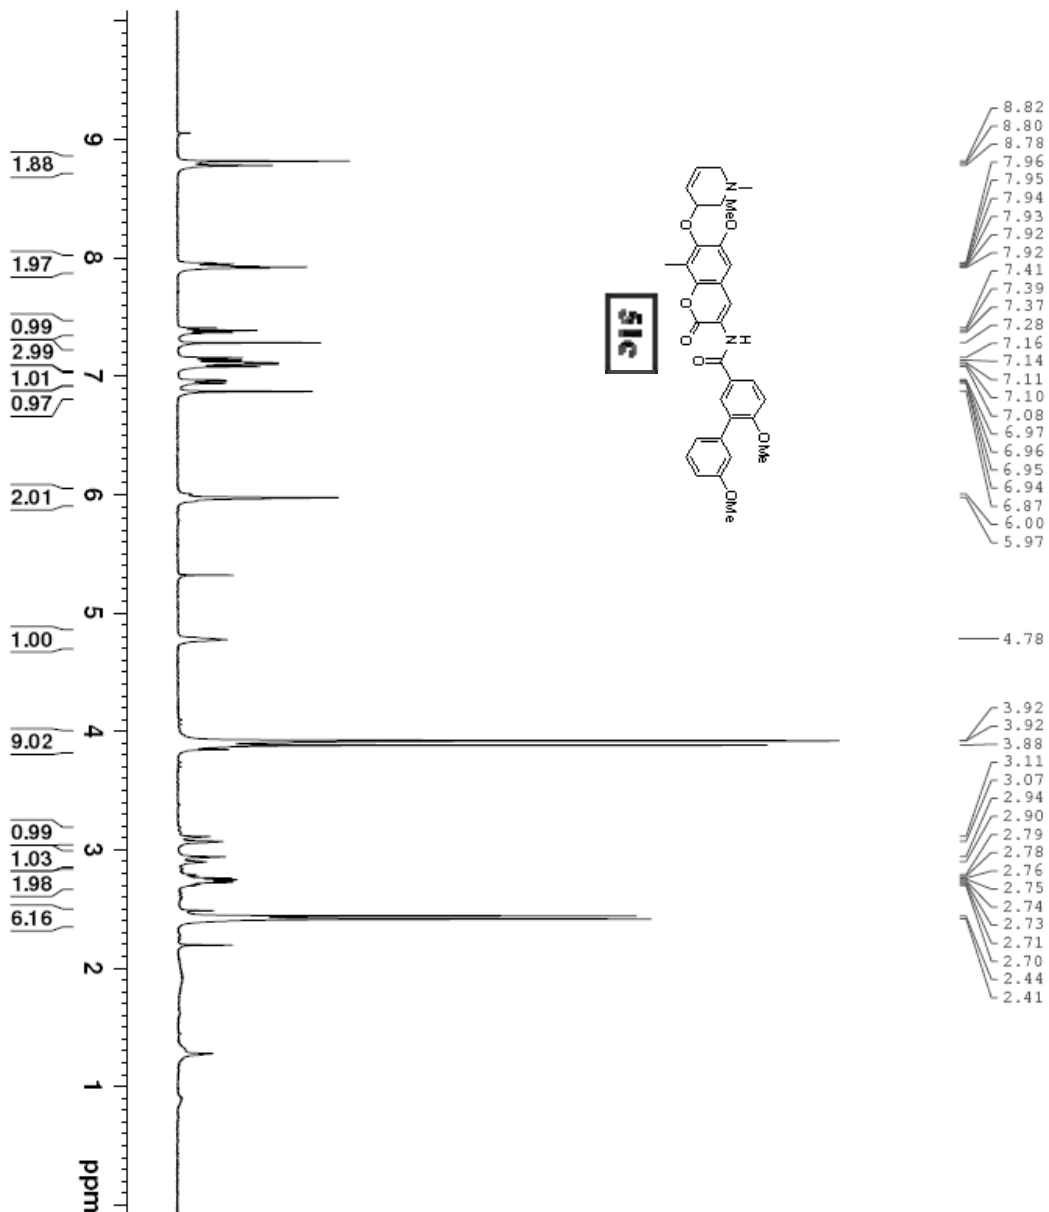

**51c**

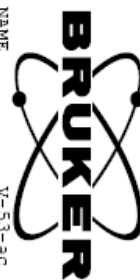

```

NAME          V-53-3c
EXPNO         1
PROCNO        1
Date_         20090215
Time         20.36
INSTRUM       dtx400
PROBHD        5 mm QNP 1H/13
PULPROG       zg30
ID            65536
SOLVENT       CDCl3
NS            16
DS            2
SWH           8278.146 Hz
FIDRES        0.126314 Hz
AQ            3.9584243 sec
RG            4
DE            60.400 usec
TE            294.2 K
D1            1.00000000 sec
ID0           1

===== CHANNEL f1 =====
NUC1          1H
P1            10.50 usec
PL1           -5.00 dB
SFO1          400.1324710 MHz
SI            32768
SF            400.1300000 MHz
WDW           EM
SSB           0
LB            0.30 Hz
GB            0
PC            1.00
    
```

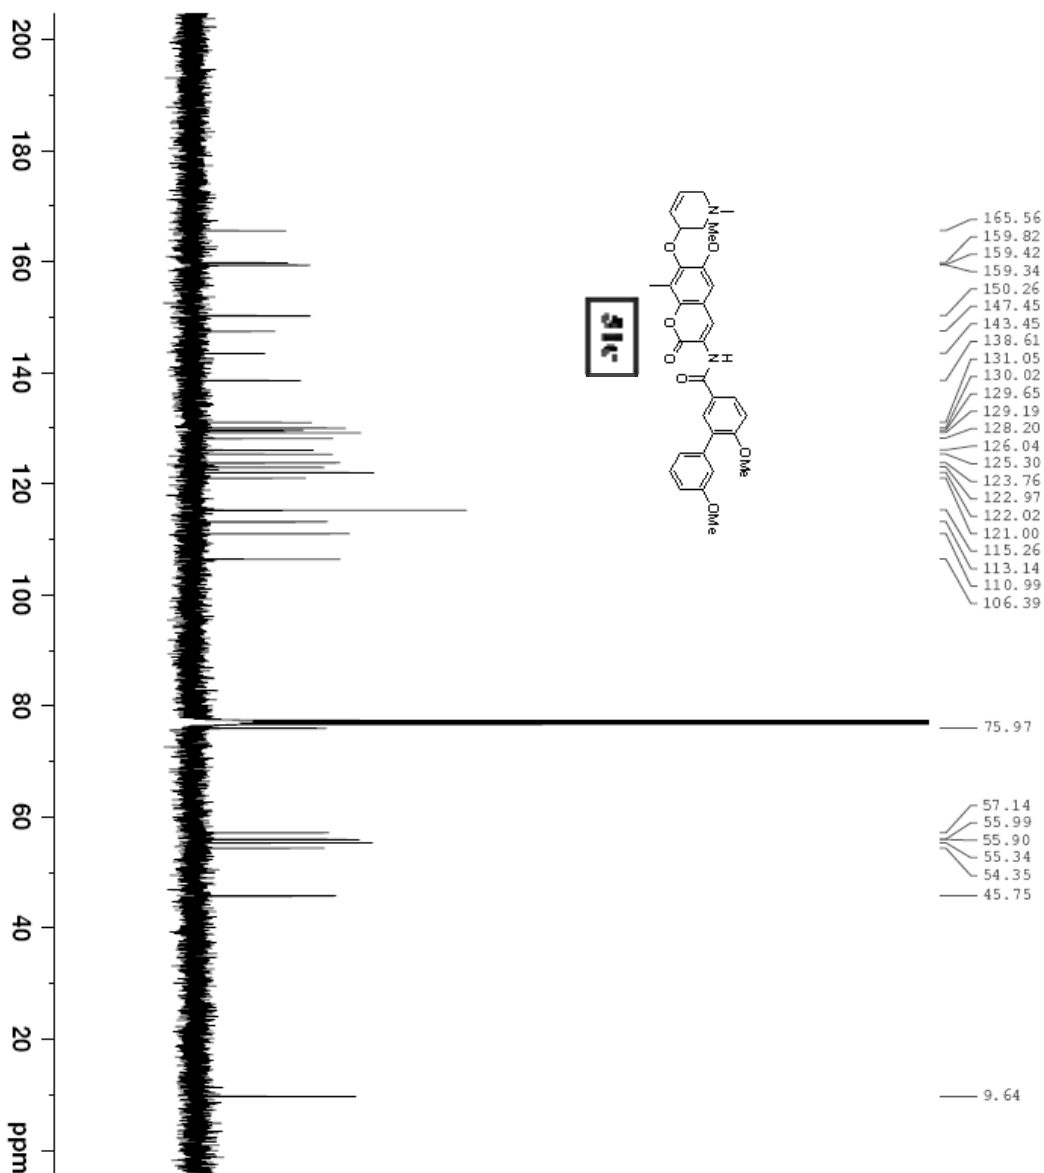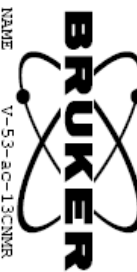

```

NAME V-53-ac-13CNMR
EXPNO 1
PROCNO 1
Date_ 20090215
Time 20.41
INSTRUM dxp400
PROBHD 5 mm QNP 1H/13
PULPROG zgpg30
TD 65536
SOLVENT CDCl3
NS 773
DS 4
SWH 23980.814 HZ
FIDRES 0.365918 HZ
AQ 1.3664756 sec
RG 32768
DM 20.850 usec
DE 6.00 usec
TE 294.3 K
D1 2.00000000 sec
d11 0.03000000 sec
DELTA 1.89999998 sec
TD0 2
===== CHANNEL f1 =====
NUC1 13C
P1 9.85 usec
PL1 -2.00 dB
SFO1 100.628298 MHz
===== CHANNEL f2 =====
CPDPRG2 waltz16
NUC2 1H
PCPD2 100.00 usec
PL2 -5.00 dB
PL12 14.58 dB
PL13 16.00 dB
SFO2 400.131605 MHz
SI 32768
SF 100.6127690 MHz
NDW 0
SSB 0
GB 1.00 HZ
PC 0
  
```

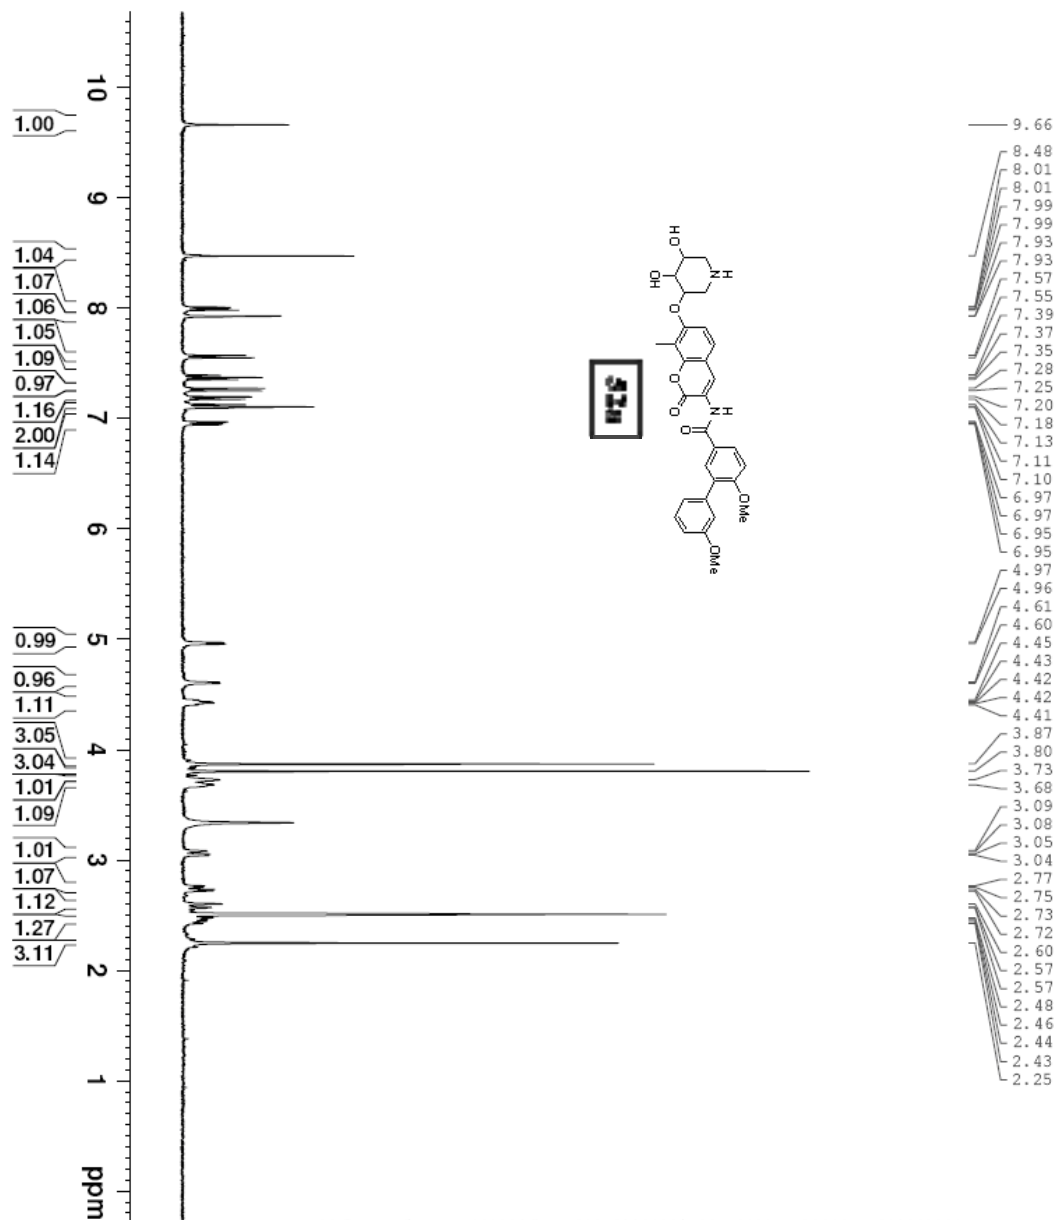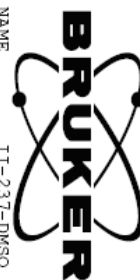

```

NAME IT-237-DMSO
EXPNO 1
PROCNO 1
Date_ 20081105
Time 0.11
INSTRUM dx400
PROBHD 5 mm QNP 1H/13
PULPROG zgpg30
TD 65536
SOLVENT DMSO
NS 16
DS 2
SWH 8278.146 Hz
FIDRES 0.126314 Hz
AQ 3.9584243 sec
RG 4
DW 60.400 usec
DE 6.00 usec
TE 294.4 K
D1 1.00000000 sec
TD0 1

===== CHANNEL f1 =====
NUC1 1H
P1 10.50 usec
PL1 -5.00 dB
SFO1 400.1324710 MHz
SI 32768
SF 400.1300000 MHz
WDW EM
SSB 0
LB 0.30 Hz
GB 0
PC 1.00
    
```

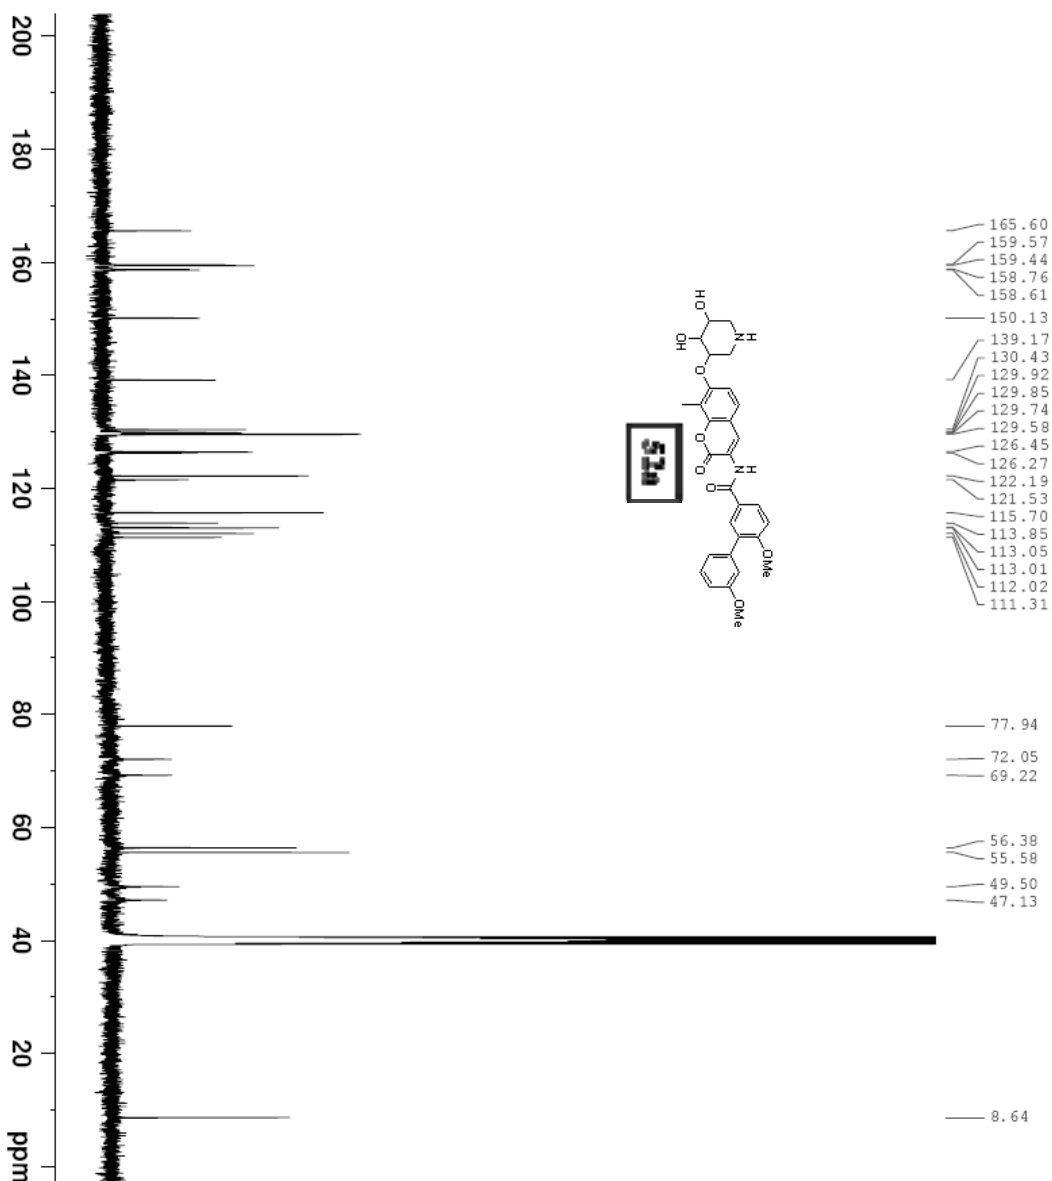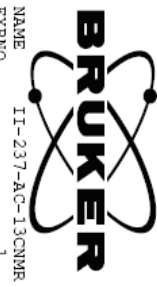

NAME II-237-AC-13CNMR  
 EXPNO 1  
 PROCNO 1  
 Date\_ 20081105  
 Time\_ 23.20  
 INSTRUM dxs400  
 PROBRD 5 mm QNP 1H/13  
 PULPROG zgpg30  
 TD 65536  
 SOLVENT DMSO  
 NS 8639  
 DS 4  
 SWH 23980.814 Hz  
 FIDRES 0.365918 Hz  
 AQ 1.3664756 sec  
 RG 32768  
 DW 20.850 usec  
 DE 6.00 usec  
 TE 295.8 K  
 D1 2.0000000 sec  
 d11 0.0300000 sec  
 DELTA 1.89999998 sec  
 TD0 1

===== CHANNEL f1 =====  
 NUC1 13C  
 P1 9.85 usec  
 PL1 -2.00 dB  
 SFO1 100.6228298 MHz

===== CHANNEL f2 =====  
 CPDPRG2 waltz16  
 NUC2 1H  
 PCPD2 100.00 usec  
 PL2 -5.00 dB  
 PL12 14.58 dB  
 PL13 16.00 dB  
 SFO2 400.1316005 MHz  
 SI 32768  
 SF 100.6127690 MHz  
 WDW EM  
 SSB 0  
 LB 1.00 Hz  
 GB 0  
 PC 1.40

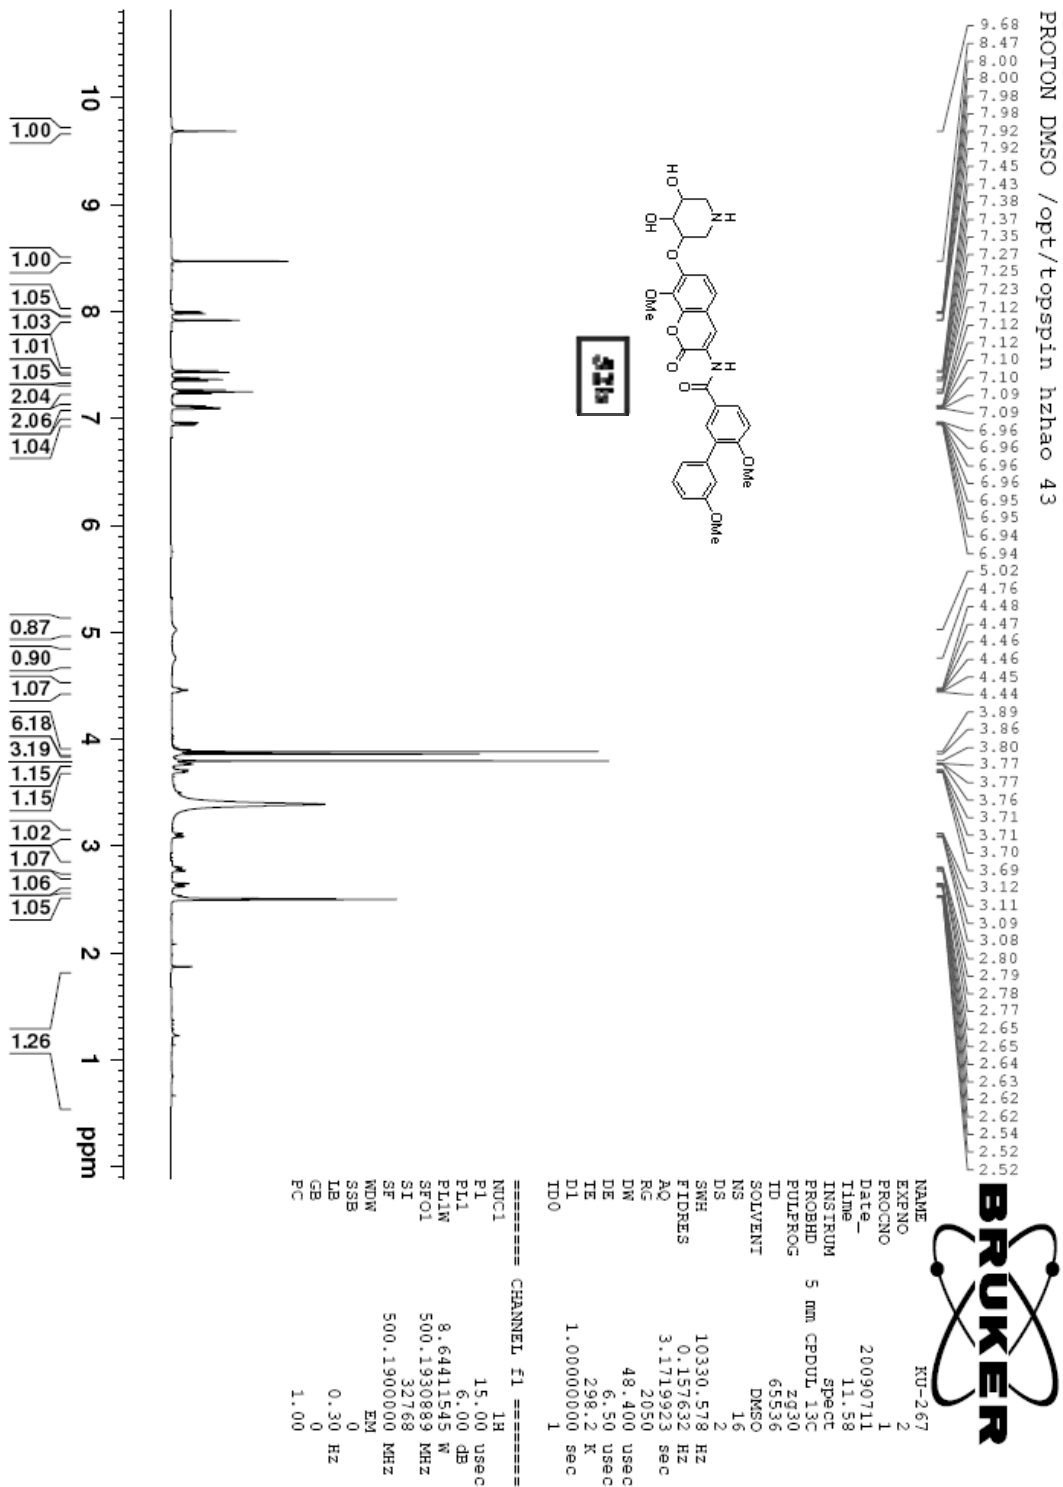

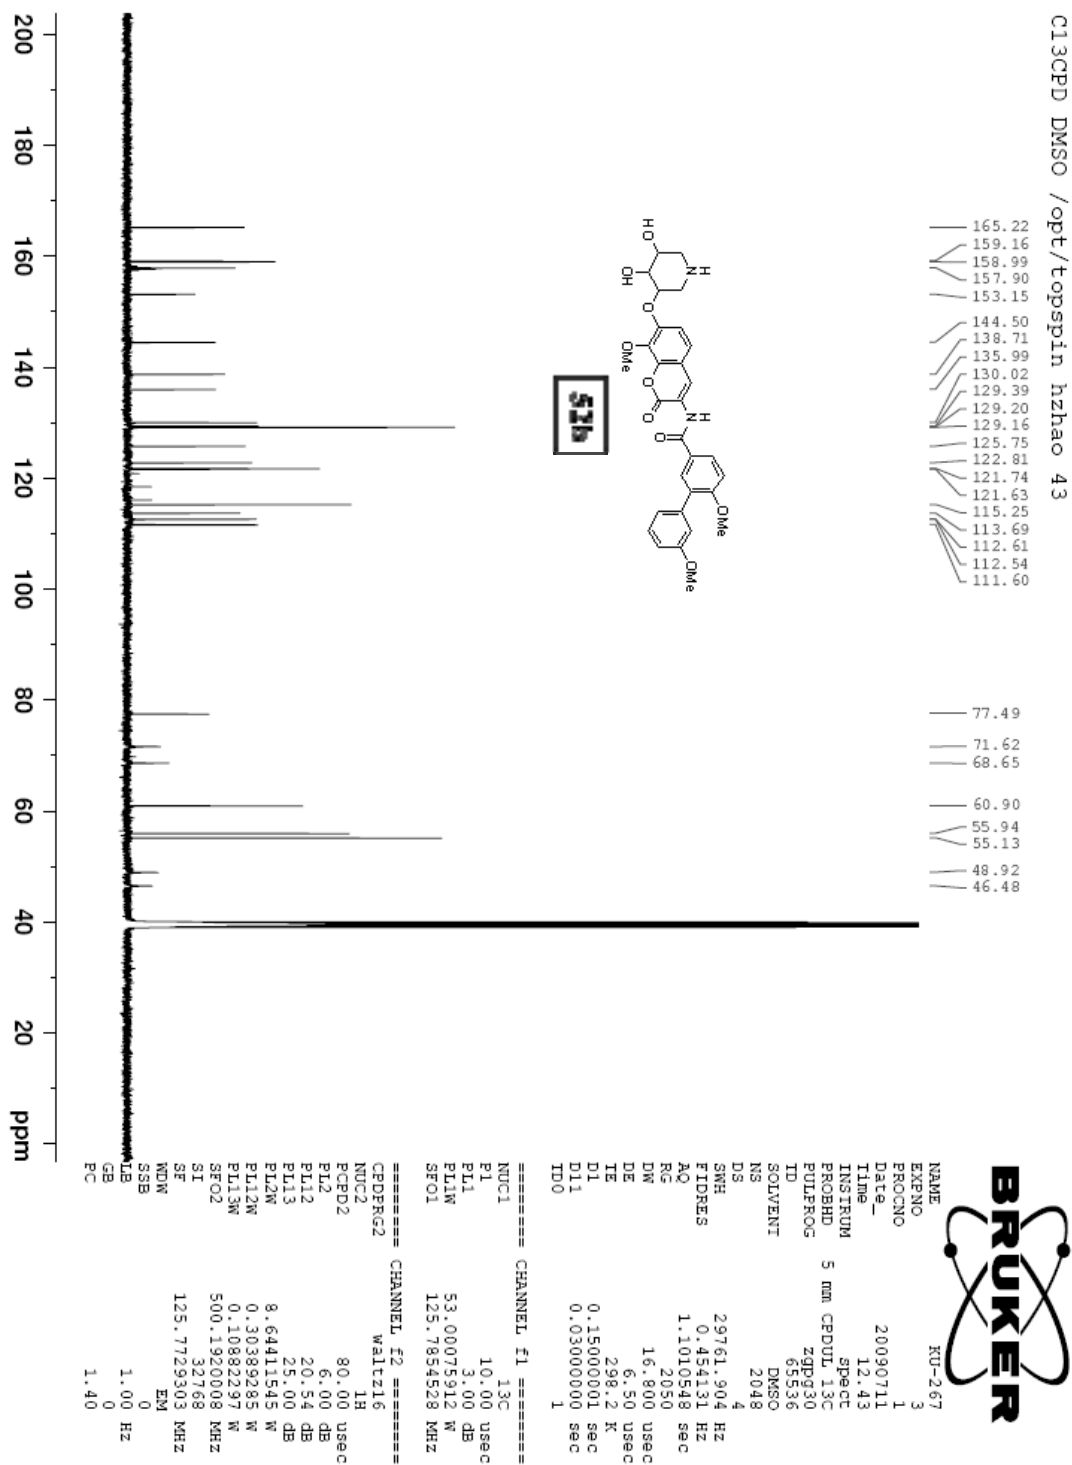

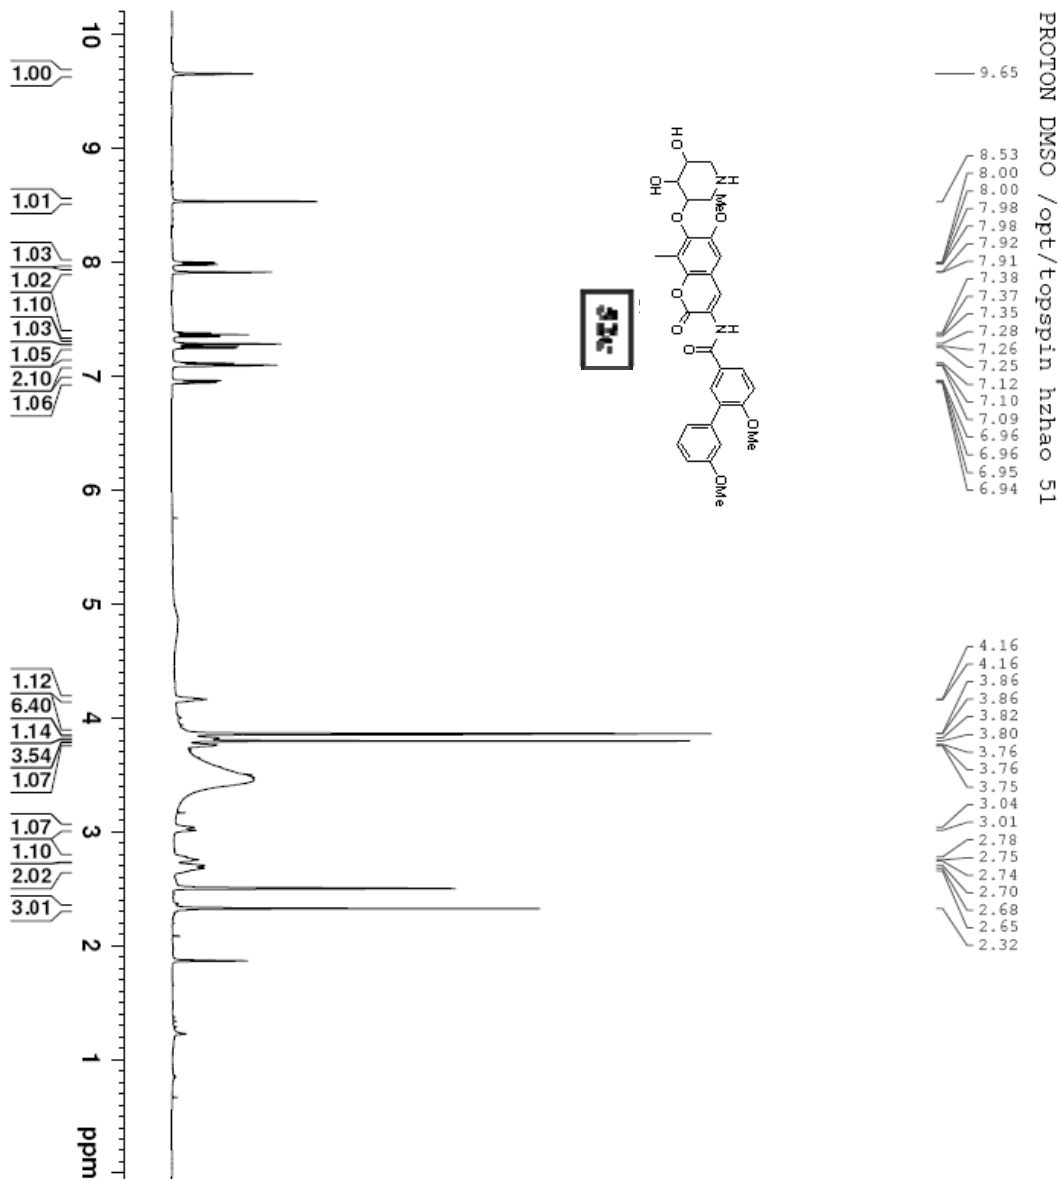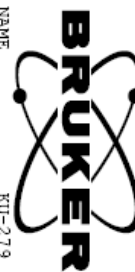

```

NAME          KU-279
EXPNO         1
PROCNO       1
Date_        20090711
Time_        16.41
INSTRUM      spect
PROBHD       5 mm CPDUL 13C
PULPROG      zg30
ID           65536
SOLVENT      DMSO
NS           16
DS           2
SWH          10330.578 HZ
FIDRES       0.157632 HZ
AQ           3.171923 sec
RG           1440
DW           48.400 usec
DE           6.50 usec
TE           298.2 K
D1           1.00000000 sec
TD0          1

===== CHANNEL f1 =====
NUC1         1H
P1           15.00 usec
PL1          6.00 dB
PL1W         8.64411545 W
SFO1         500.1930889 MHz
SI           32768
SF           500.1900000 MHz
WDW          EM
SSB          0
GB           0
PC           1.00
    
```

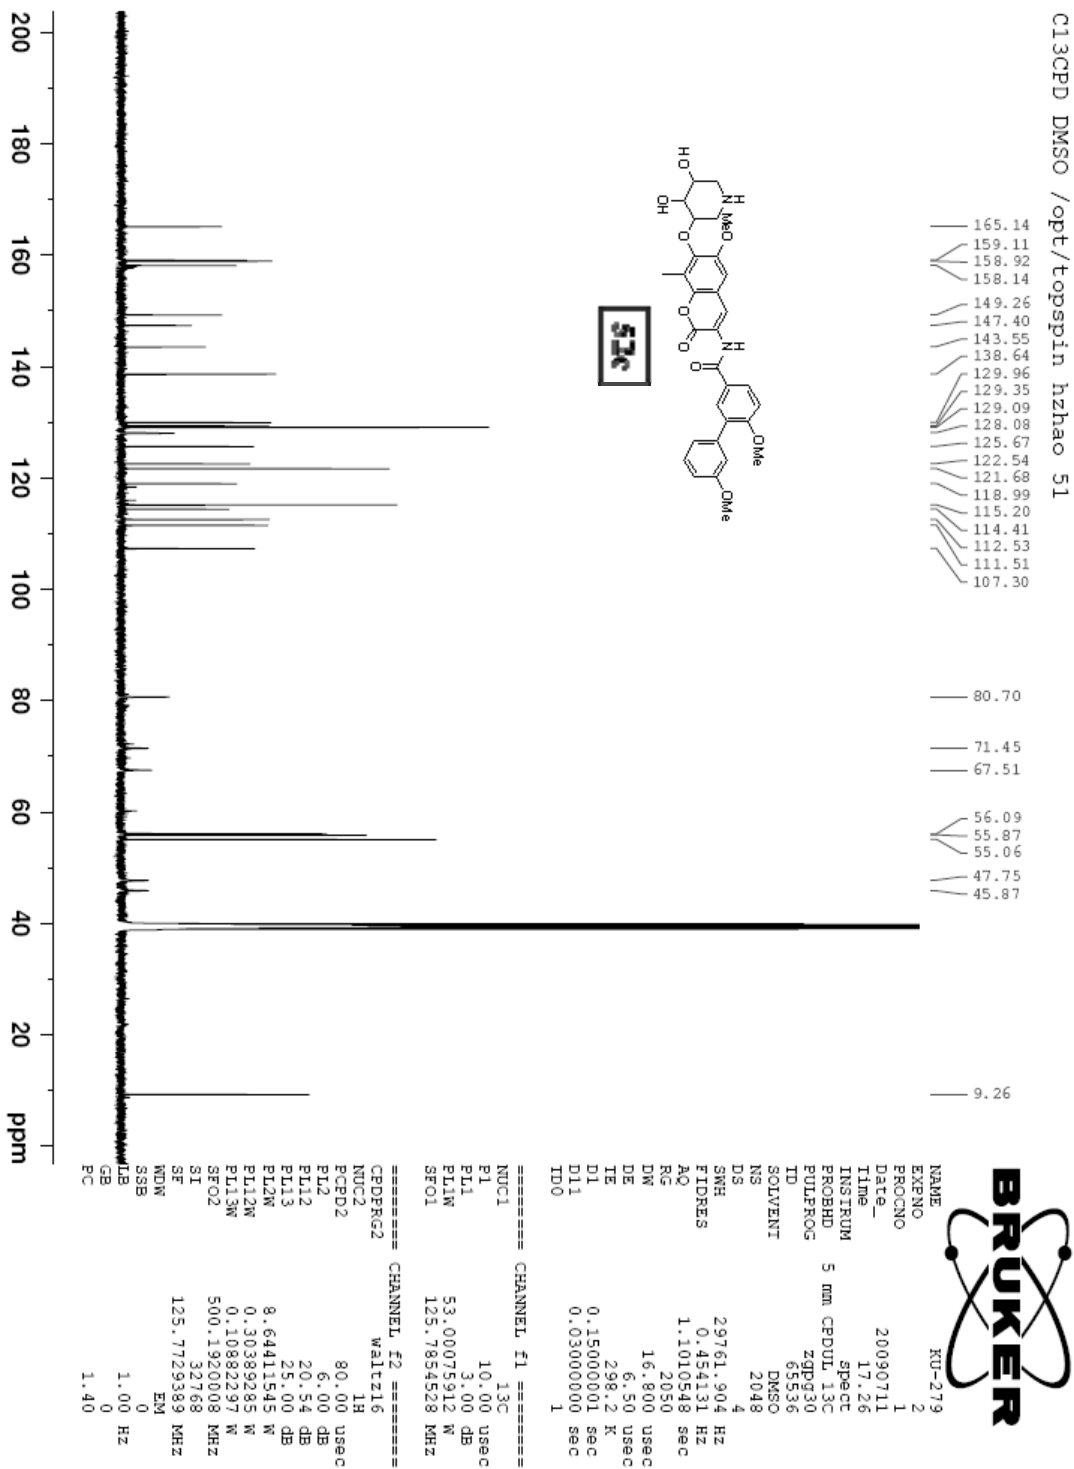



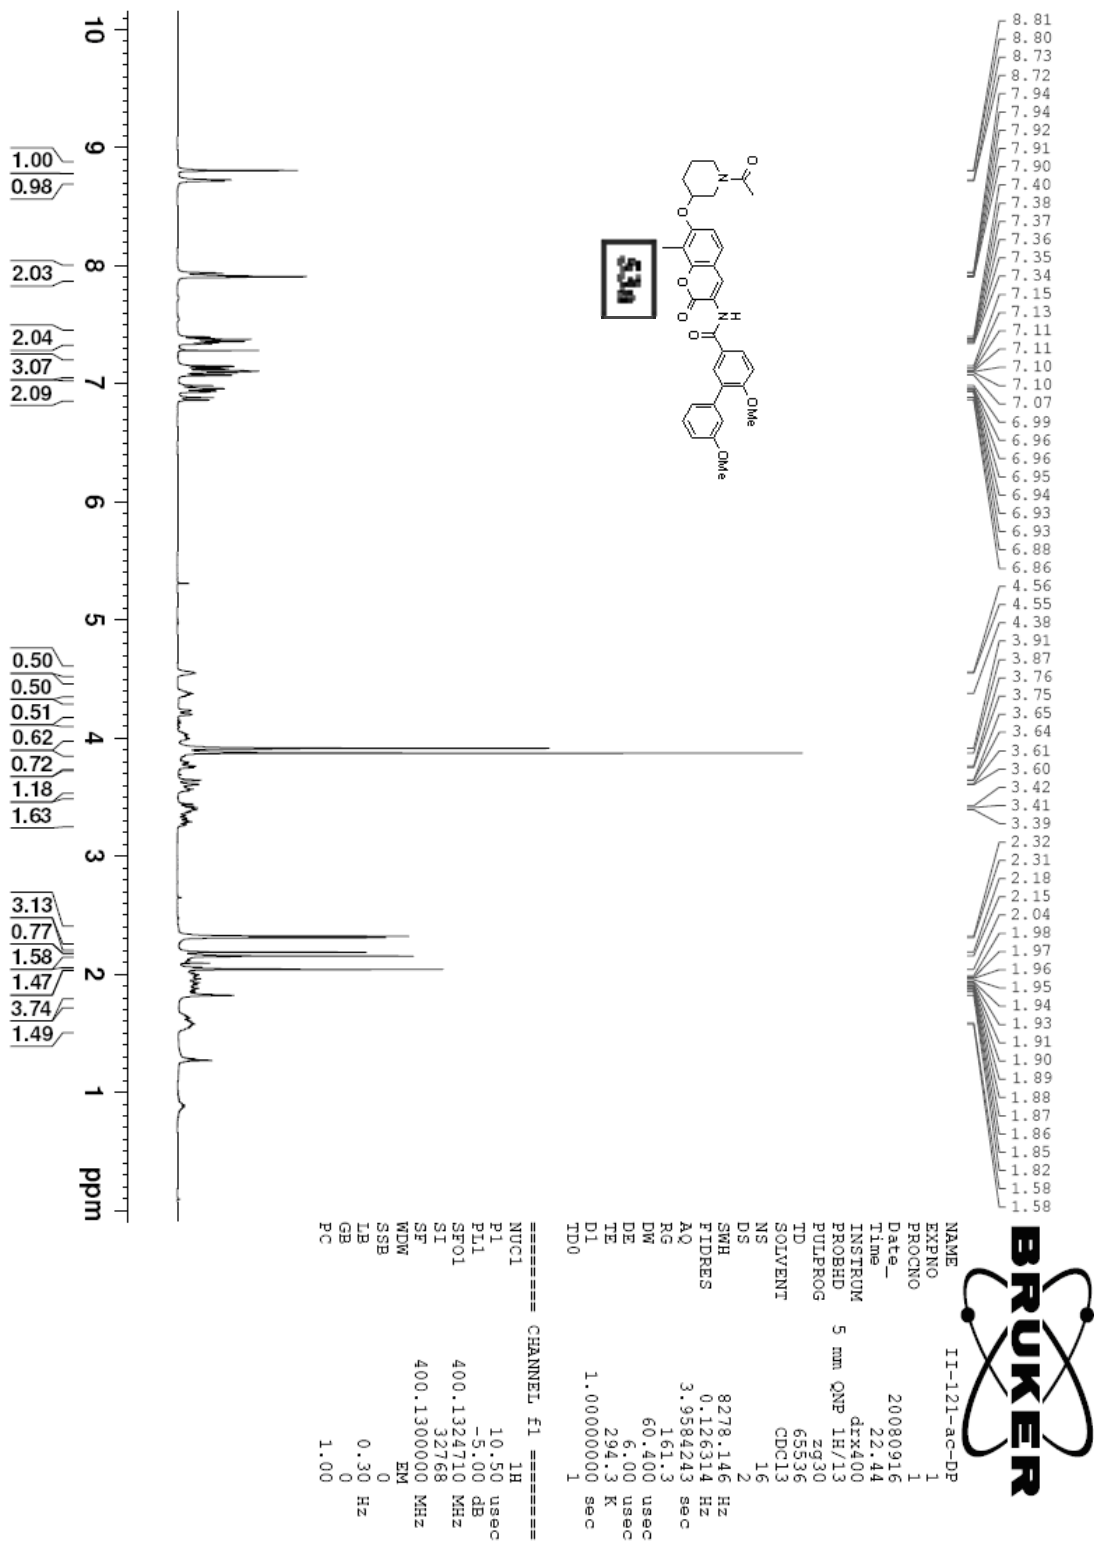

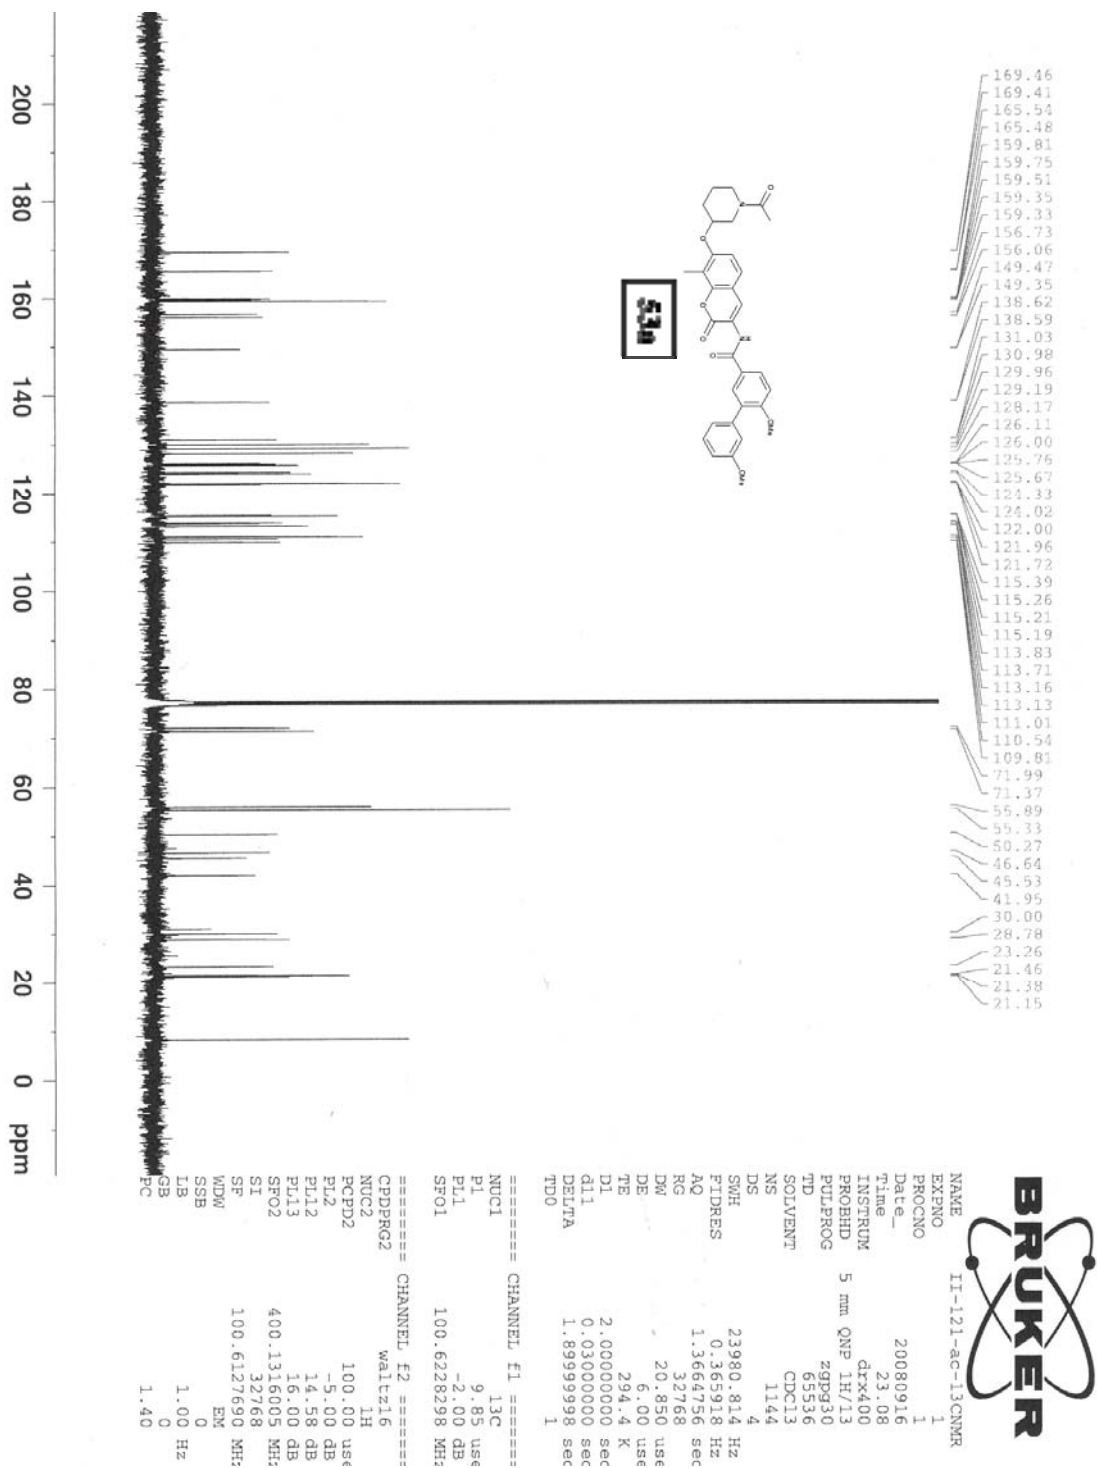

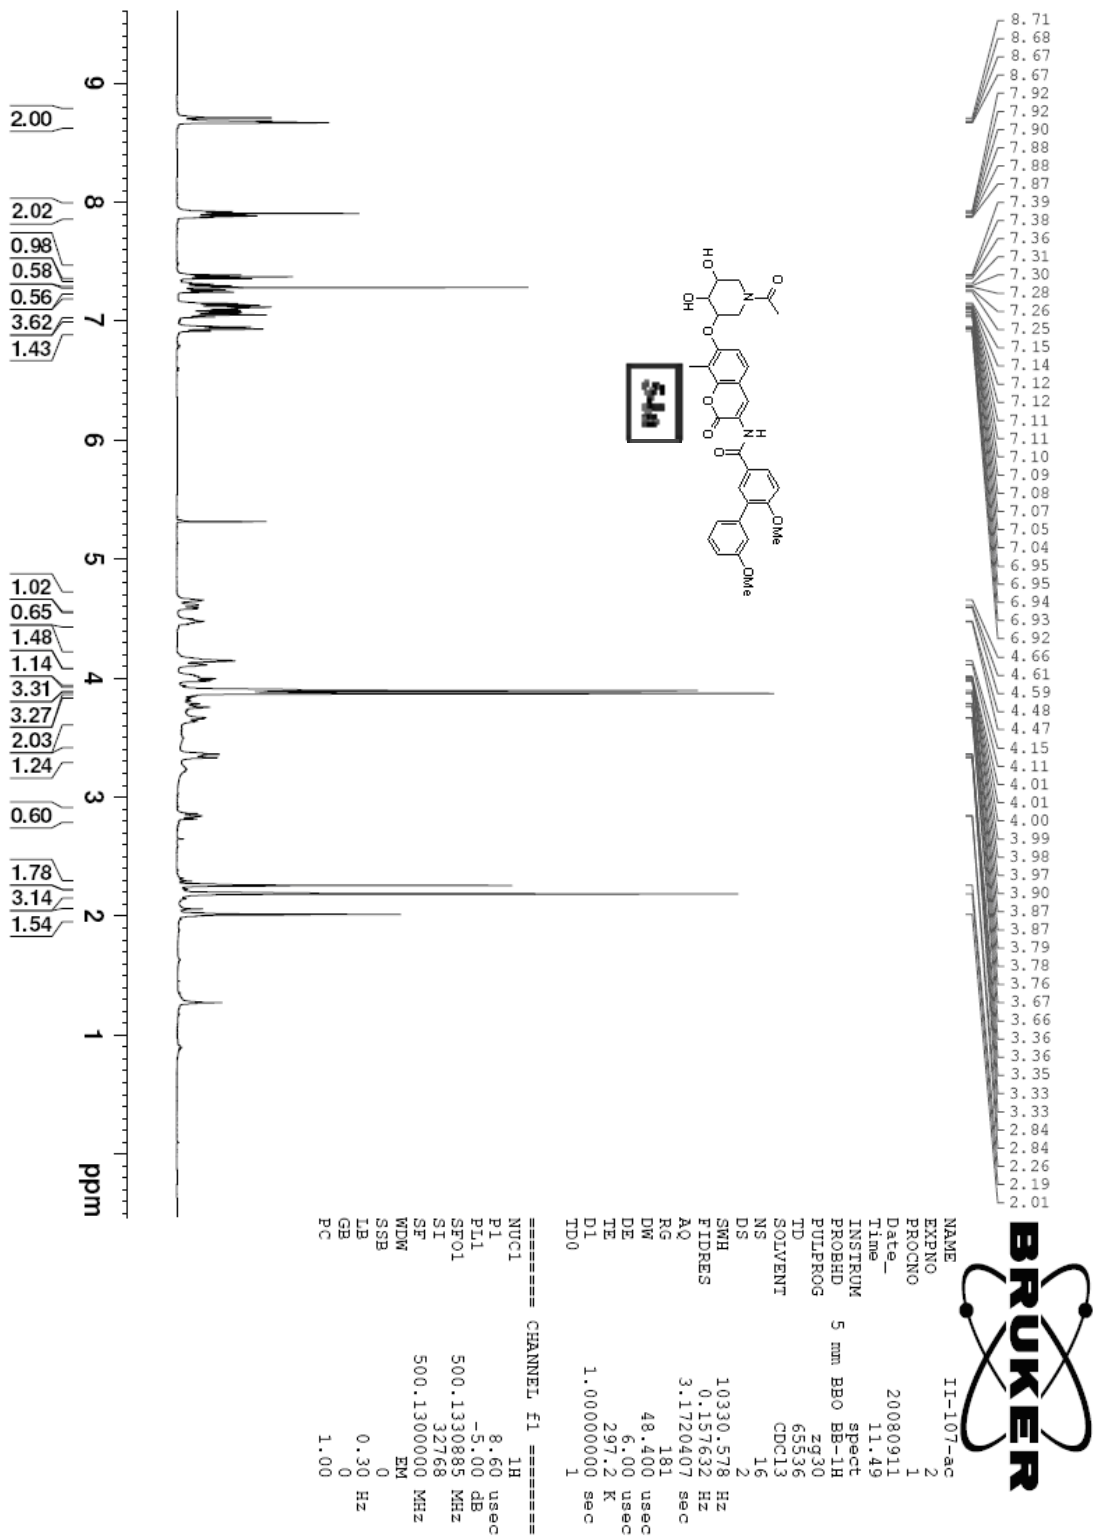

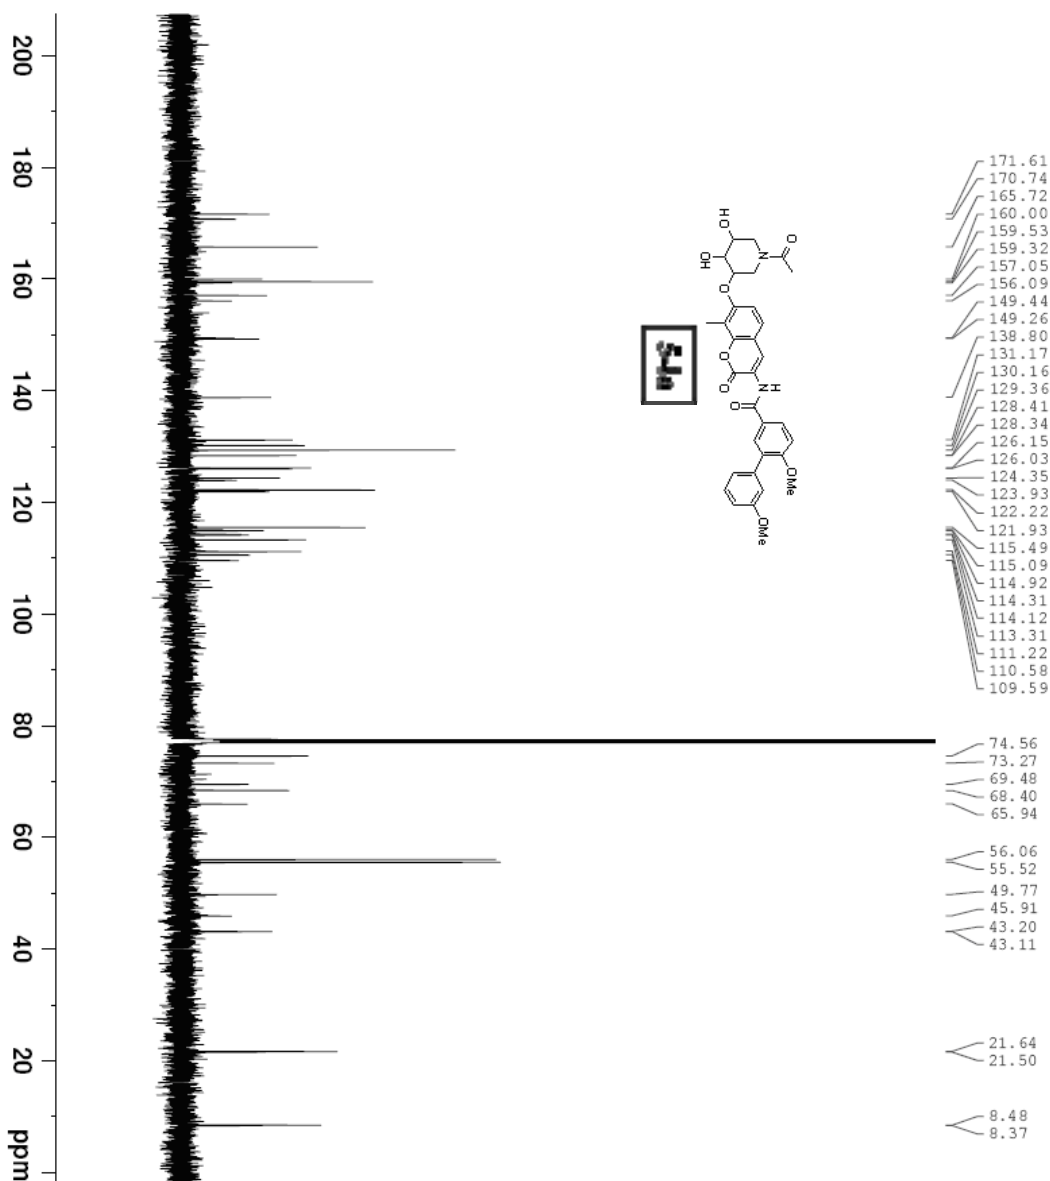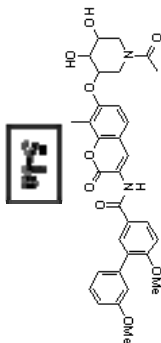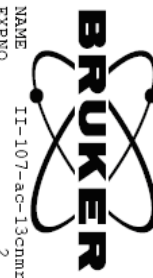

```

NAME      II-107-ac-13cmr
EXPNO     1
PROCNO    1
Date_     20080911
Time      12.02
INSTRUM   spect
PROBHD    5 mm BBO BB-1H
PULPROG   zgpg30
TD         65536
SOLVENT   CDCl3
NS         1024
DS         4
SWH        30030.029 Hz
FIDRES     0.458222 Hz
AQ         1.0912410 sec
RG         32768
DE         16.650 usec
TE         6.00 usec
D1         0.1500001 sec
d11        0.0300000 sec
DELTA     0.05000000 sec
TD0        1

===== CHANNEL f1 =====
NUC1      13C
P1        8.90 usec
PL1       -1.15 dB
SFO1      125.7703643 MHz

===== CHANNEL f2 =====
CPDPRG2   waltz16
NUC2
PCPD2     95.00 usec
PL2       -5.00 dB
PL12      15.86 dB
PL13      30.00 dB
SFO2      500.1320005 MHz
SI        32768
SF        125.7577658 MHz
WDW        EM
SSB        0
GB         0
PC         1.40
    
```

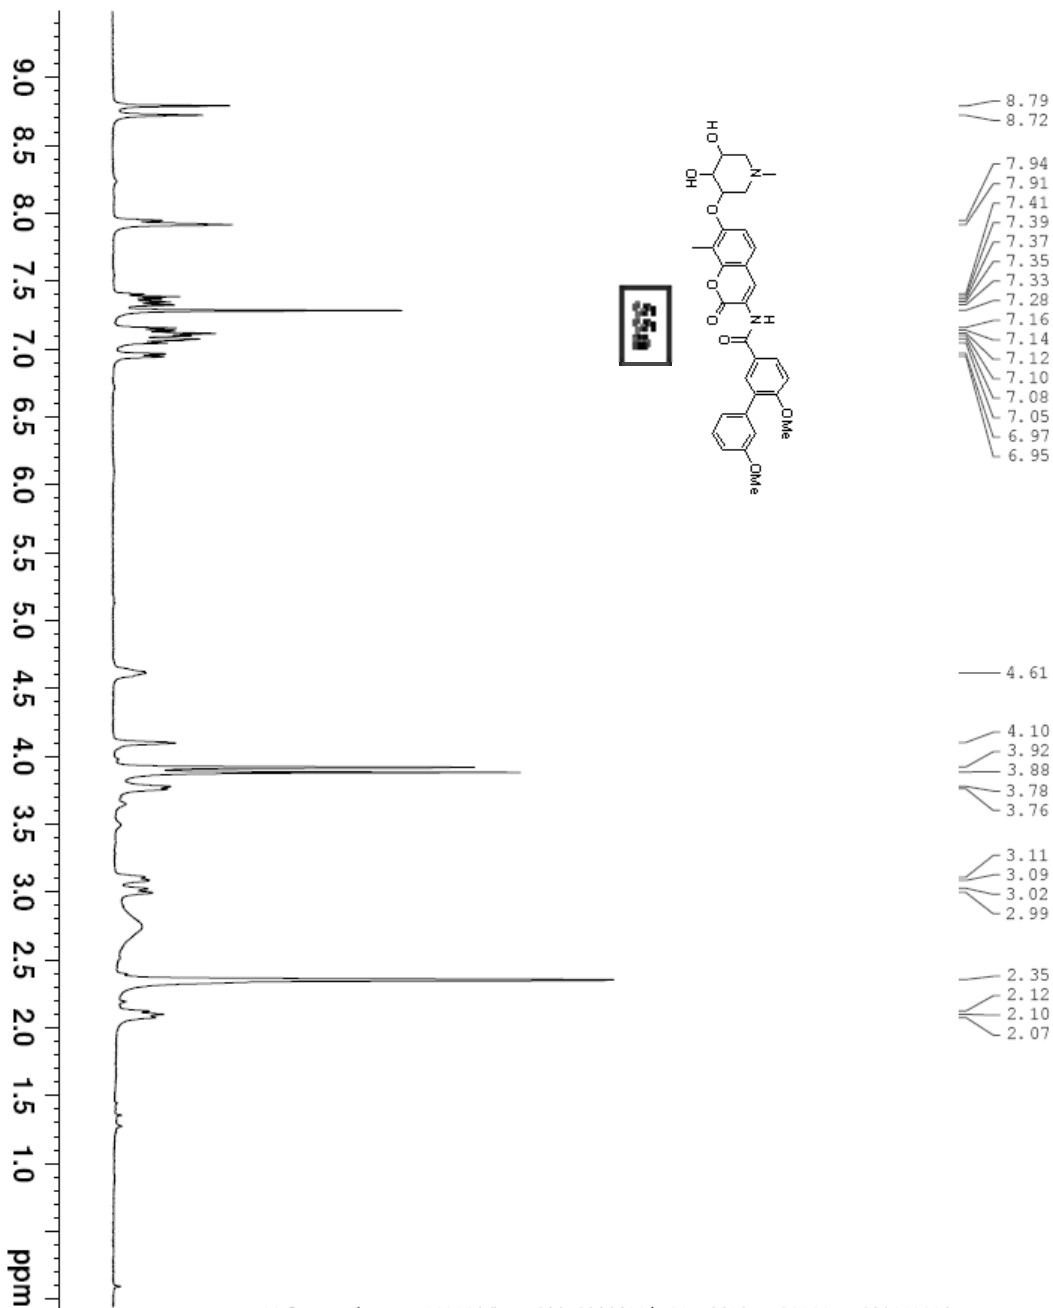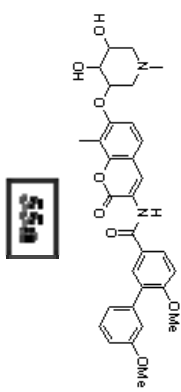

**BRUKER**

NAME: IT-199-PTLC  
 EXPNO: 1  
 PROCNO: 1  
 Date\_: 20081113  
 Time: 10.03  
 INSTRUM: dxr400  
 PROBHD: 5 mm QNP 1H/13  
 PULPROG: zg30  
 TD: 65536  
 SOLVENT: CDCl3  
 NS: 16  
 DS: 2  
 SWH: 8278.146  
 FIDRES: 0.126314  
 RG: 3.9584243  
 DE: 161.3  
 DW: 60.400  
 TE: 6.00  
 D1: 295.4  
 TD0: 1.0000000  
 1

==== CHANNEL f1 ====  
 NUC1: 1H  
 P1: 10.50  
 PL1: -5.00  
 SEFO1: 400.1324710  
 SI: 32768  
 SF: 400.1300000  
 WDW: EM  
 SSB: 0  
 LB: 0.30  
 GB: 0  
 PC: 1.00

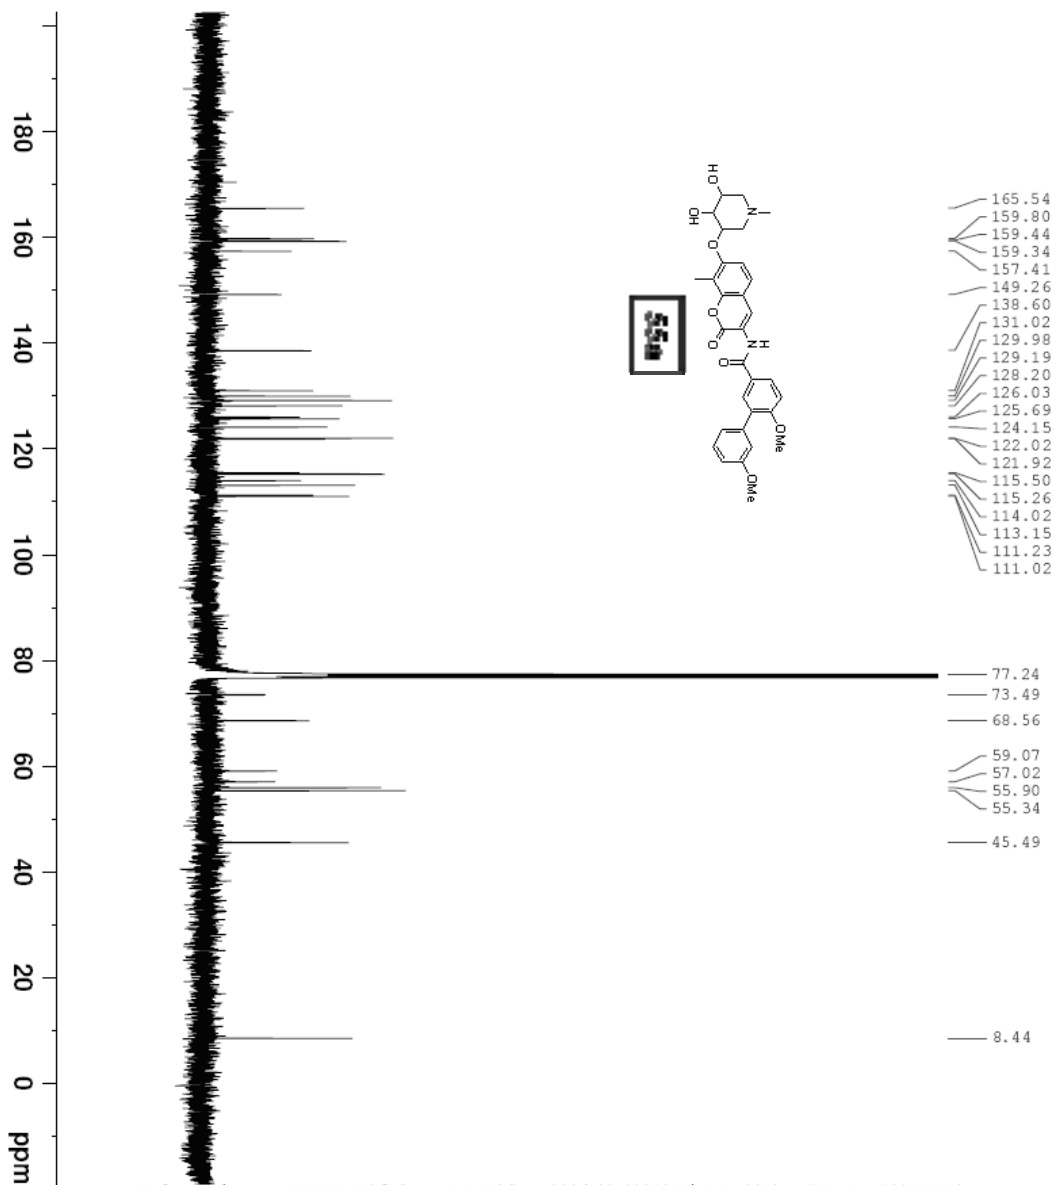

165.54  
159.80  
159.44  
159.34  
157.41  
149.26  
138.60  
131.02  
129.98  
129.19  
128.20  
126.03  
125.69  
124.15  
122.02  
121.92  
115.50  
115.26  
114.02  
113.15  
111.23  
111.02

77.24  
73.49  
68.56  
59.07  
57.02  
55.90  
55.34  
45.49

8.44

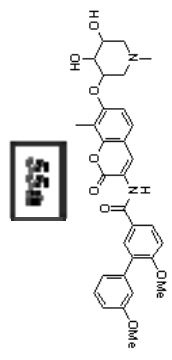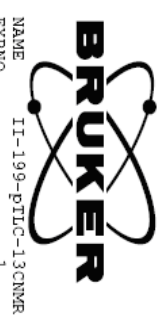

```

NAME II-199-pTLC-13CNMR
EXPNO 1
PROCNO 1
Date_ 20081113
Time 22.00
INSTRUM dirx400
PROBHD 5 mm QNP 1H/13
PULPROG zgpg30
TD 65536
SOLVENT CDCl3
NS 2298
DS 4
SWH 23980.814 Hz
FIDRES 0.365918 Hz
AQ 1.3664756 sec
RG 1625.5
DE 20.850 usec
TE 295.0 K
D1 2.00000000 sec
d11 0.03000000 sec
DELTA 1.89999998 sec
TD0 1
    
```

```

===== CHANNEL f1 =====
NUC1 13C
P1 9.85 usec
P11 -2.00 dB
SFO1 100.6228298 MHz
    
```

```

===== CHANNEL f2 =====
CPDPRG2 waltz16
NUC2 1H
PCPD2 100.00 usec
P12 -5.00 dB
P112 14.58 dB
P113 16.00 dB
SFO2 400.1315005 MHz
SI 32768
SF 100.6127690 MHz
WDW EM
SSB 0
GB 0
PC 1.40
    
```

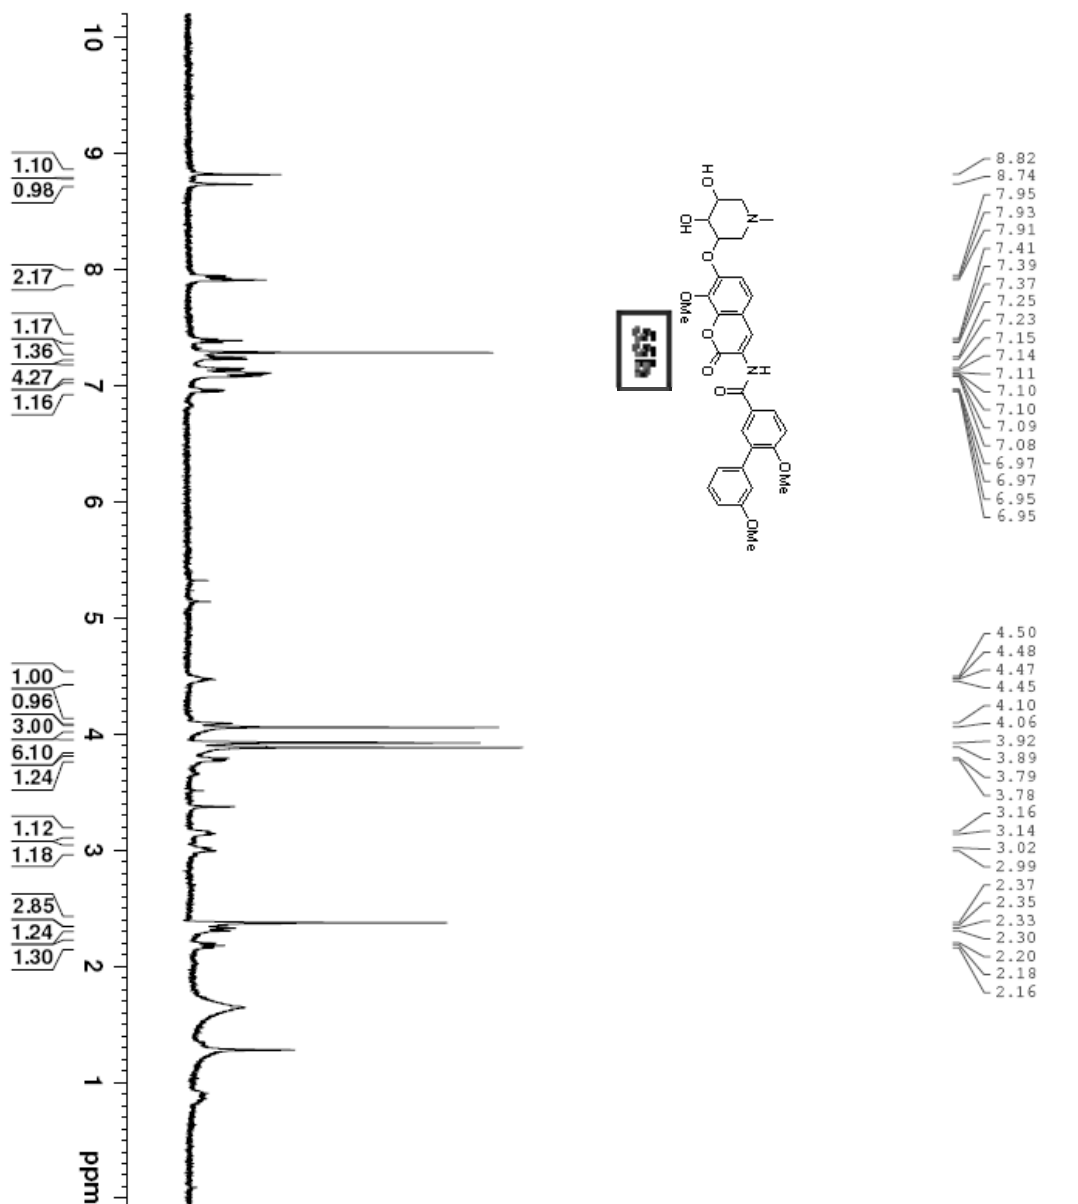

- 8.82
  - 8.74
  - 7.95
  - 7.93
  - 7.91
  - 7.41
  - 7.39
  - 7.37
  - 7.25
  - 7.23
  - 7.15
  - 7.14
  - 7.11
  - 7.10
  - 7.10
  - 7.09
  - 7.08
  - 6.97
  - 6.97
  - 6.95
  - 6.95
- 
- 4.50
  - 4.48
  - 4.47
  - 4.45
  - 4.10
  - 4.06
  - 3.92
  - 3.89
  - 3.79
  - 3.78
  - 3.16
  - 3.14
  - 3.02
  - 2.99
  - 2.37
  - 2.35
  - 2.33
  - 2.30
  - 2.20
  - 2.18
  - 2.16

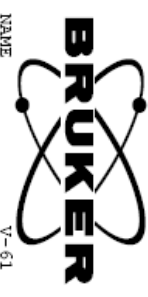

```

NAME V-61
EXPNO 2
PROCNO 1
Date_ 20090217
Time_ 20.39
INSTRUM spect
PROBHD 5 mm BBO BB-1H
PULPROG zg30
TD 65536
SOLVENT CDCl3
NS 16
DS 2
SWH 10330.578 Hz
FIDRES 0.157632 Hz
AQ 3.1720407 sec
RG 4
DW 48.400 usec
DE 6.00 usec
TE 297.2 K
D1 1.00000000 sec
TD0 1

===== CHANNEL f1 =====
NUC1 1H
P1 8.60 usec
PL1 -5.00 dB
SFO1 500.1330885 MHz
SI 32768
SF 500.1330000 MHz
WDW EM
SSB 0
LB 0.30 Hz
GB 0
PC 1.00
    
```

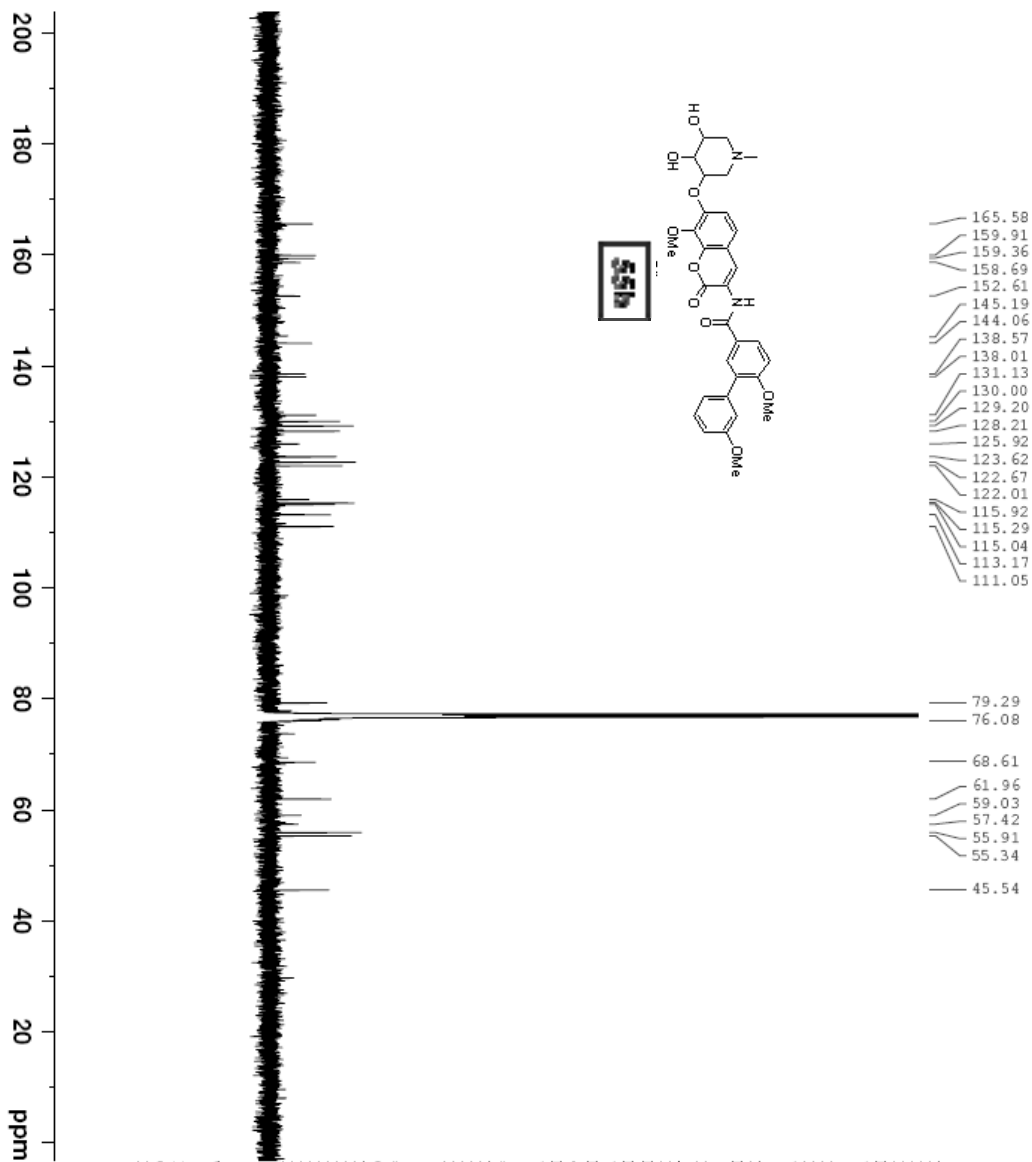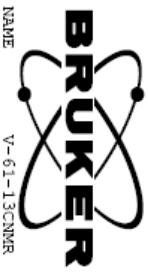

```

NAME V-61-13CNMR
EXPNO 2
PROCNO 1
Date_ 20090217
Time 20.48
INSTRUM spect
PROBHD 5 mm BBO BB-1H
PULPROG zgpg30
TD 65536
F2 10240
SOLVENT CDCl3
NS 4
DS 30030.029 HZ
SWH 0.458222 HZ
FIDRES 1.0912410 sac
AQ 32768
RG 16.650 usec
DE 6.00 usec
TE 298.2 K
D1 0.1500001 sec
d11 0.03000000 sec
DELTA 0.05000000 sec
TDO 2

===== CHANNEL f1 =====
NUC1 13C
P1 8.90 usec
PL1 -1.15 dB
SFO1 125.7703643 KHZ

===== CHANNEL f2 =====
CPDPRG2 waltz16
NUC2 1H
PCPD2 95.00 usec
PL2 -5.00 dB
PL12 15.86 dB
PL13 30.00 dB
SFO2 500.1320005 KHZ
SI 32768
SF 125.7577890 KHZ
WDW EM
SSB 0
LB 1.00 HZ
GB 0
PC 1.40
    
```



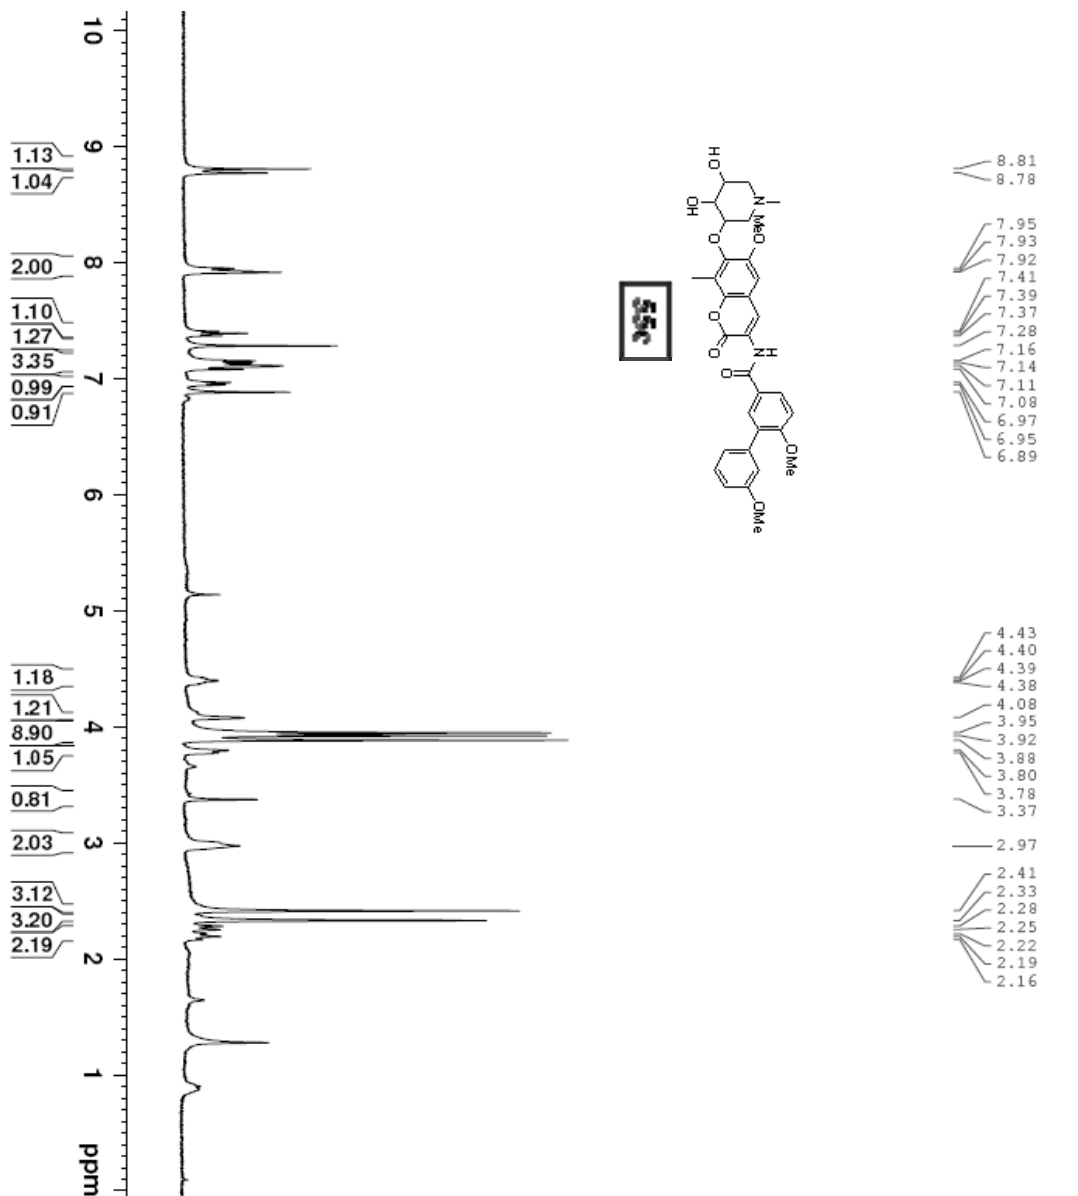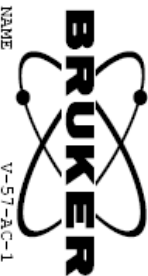

```

NAME          V-57-AC-1
EXPNO         1
PROCNO        1
Date_         20090216
Time_         20.58
INSTRUM       dir400
PROBHD        5 mm QNP 1H/13
PULPROG       zg30
TD            65536
SOLVENT       CDCl3
NS            16
DS            2
SWH           8278.146 HZ
FIDRES        0.126314 HZ
AQ            3.9584243 sec
RG            4
DE            60.400 usec
TE            294.5 K
D1            1.000000000 sec
TD0           1

===== CHANNEL f1 =====
NUC1           1H
P1            10.50 usec
PL1           -5.00 dB
SFO1          400.1324710 KHZ
SI            32768
SF            400.1300000 KHZ
WDW           EM
SSB           0
GB            0
PC            1.00
    
```

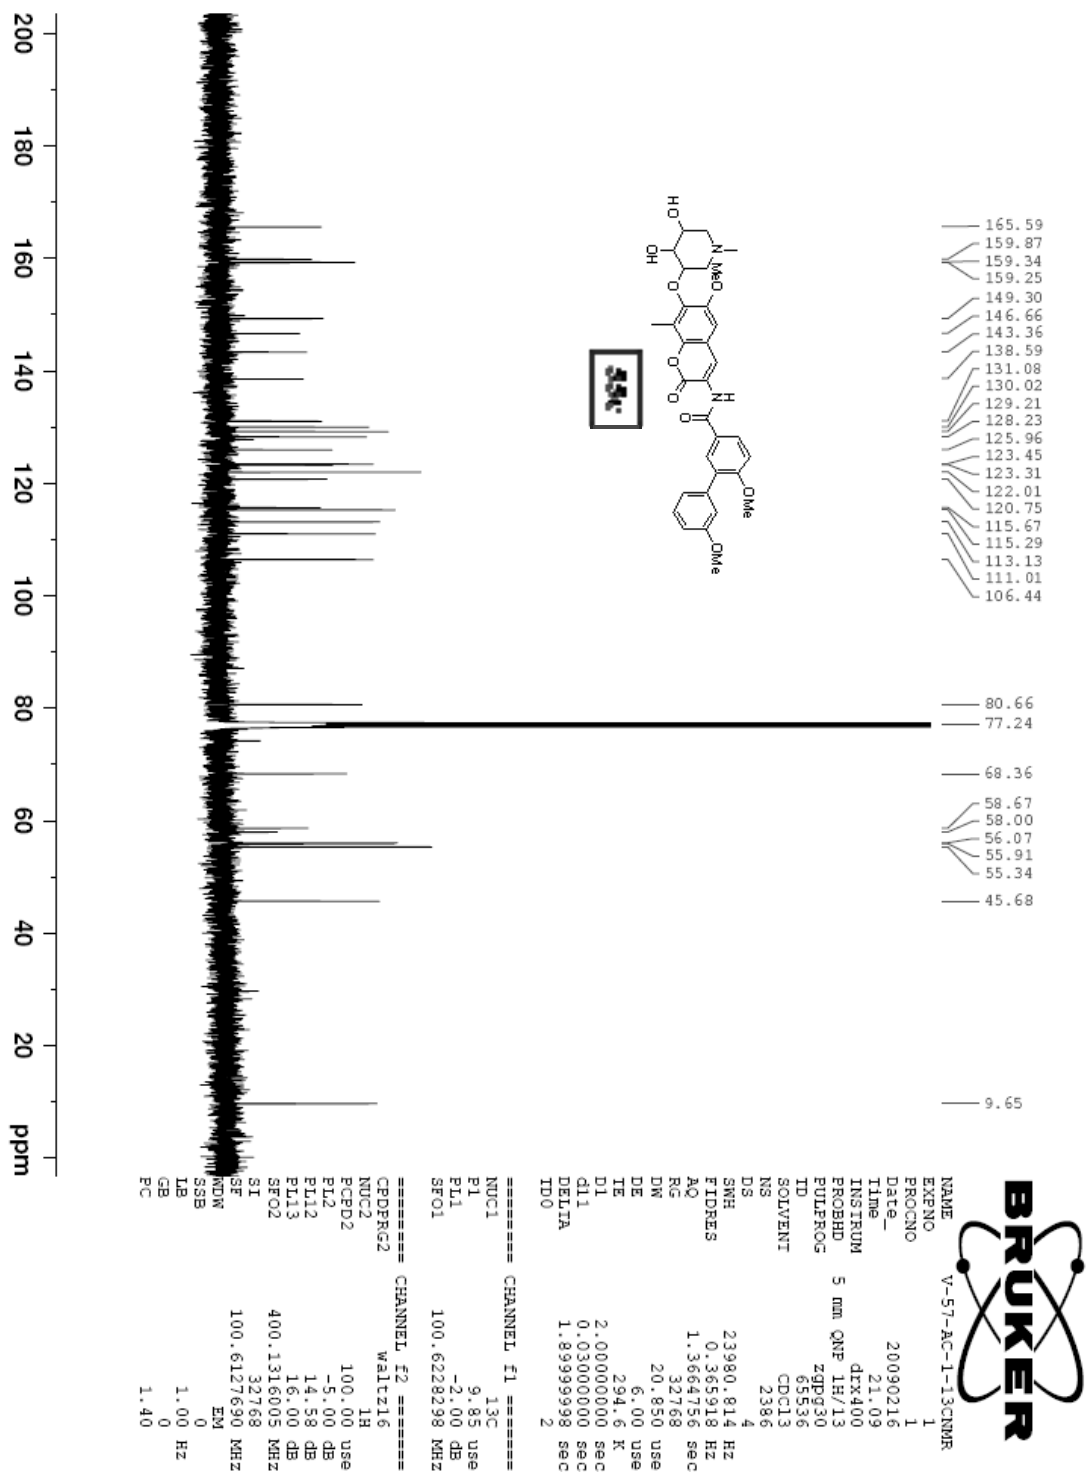

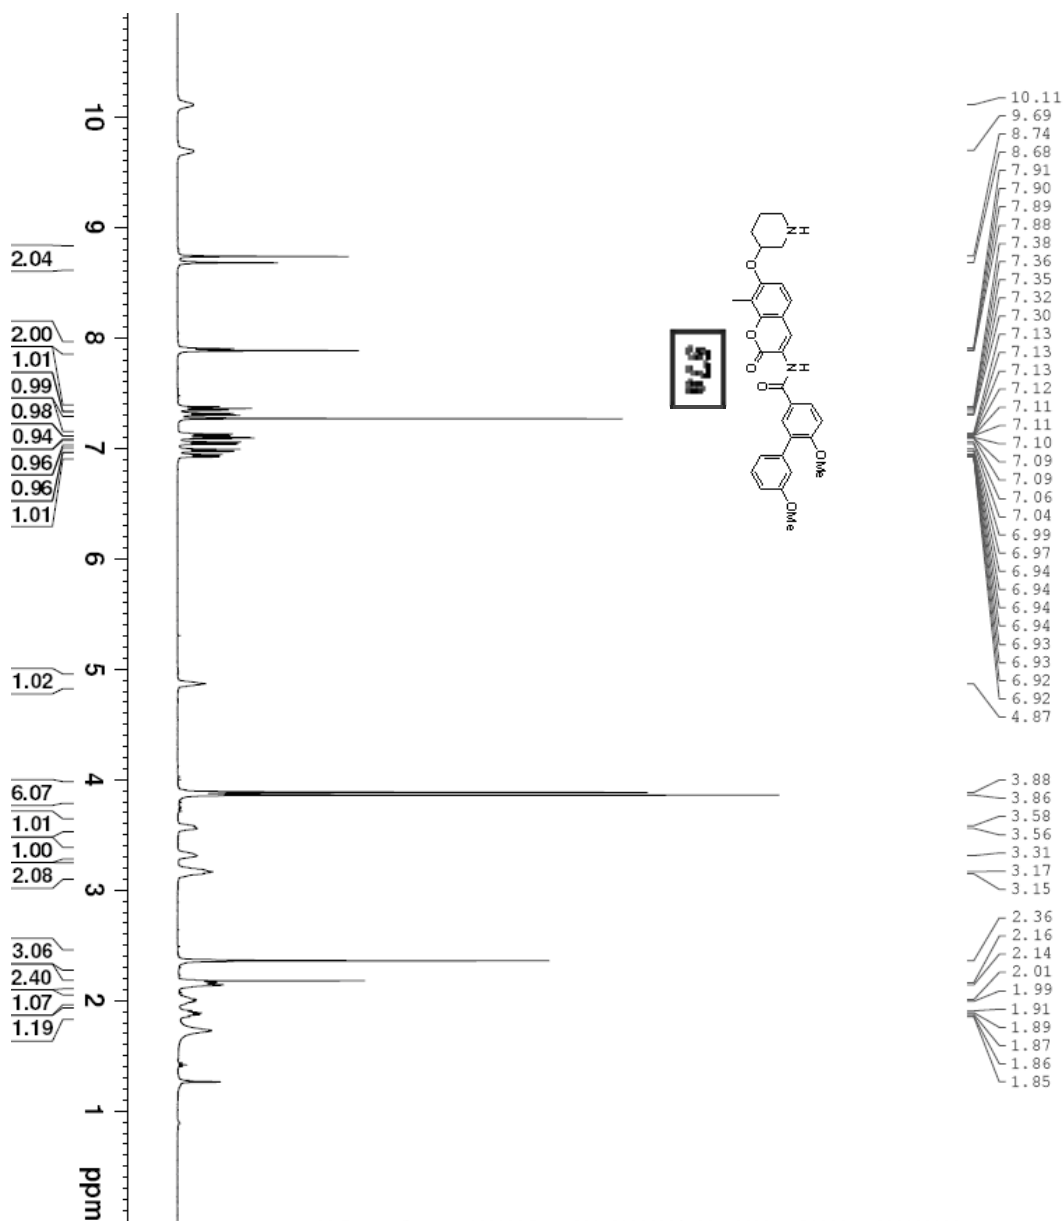

**57a**

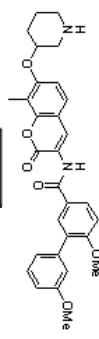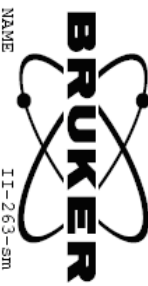

```

NAME      II-263-sm
EXPNO     2
PROCNO    1
Date_     20081107
Time      9.18
INSTRUM   spect
PROBHD    5 mm BBO BB-1H
PULPROG   zgpg30
TD         65336
SOLVENT   CDCl3
NS         16
DS         2
SWH        10330.578 Hz
FIDRES     0.157632 Hz
AQ         3.1720407 sec
RG         406.4
DW         48.400 usec
DE         6.00 usec
TE         298.2 K
D1         1.00000000 sec
TD0        1

===== CHANNEL f1 =====
NUC1      1H
P1        8.60 usec
PL1       -5.00 dB
SFO1      500.1330885 MHz
SI        32768
SF        500.1330077 MHz
WDW       EM
SSB       0
LB        0.30 Hz
GB        0
PC        1.00
    
```

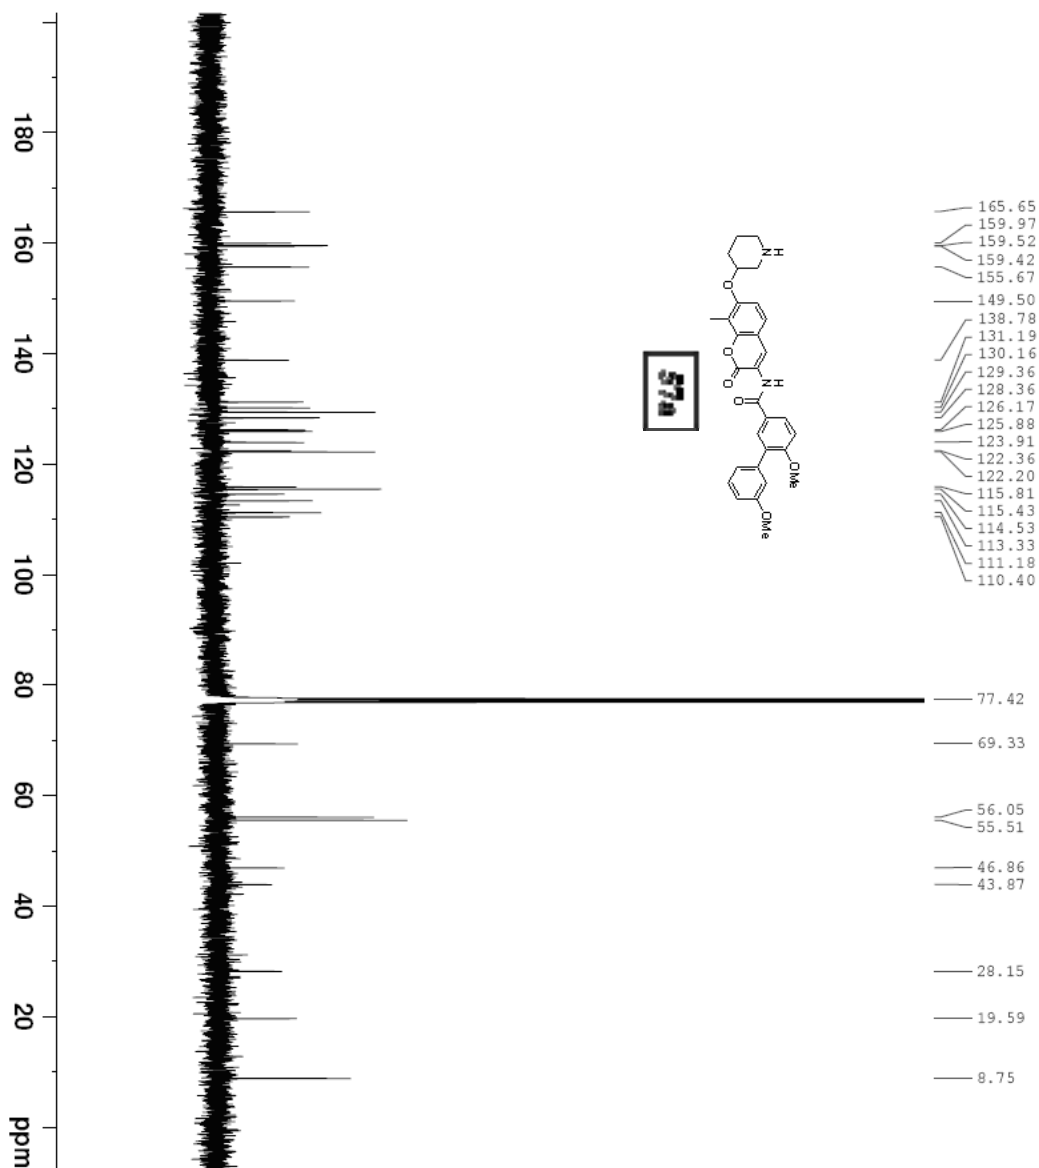

**BRUKER**  
 II-263-sm-13C NMR

```

NAME
EXPNO 1
PROCNO 1
Date_ 20081107
Time 21.01
INSTRUM dx400
PROBHD 5 mm QNP 1H/13
PULPROG zgpg30
TD 65536
SOLVENT CDCl3
NS 2048
DS 4
SWH 23980.814 Hz
FIDRES 0.365918 Hz
AQ 1.3664756 sec
RG 32768
DE 20.850 usec
TE 295.7 K
D1 2.00000000 sec
d11 0.03000000 sec
DELTA 1.89999998 sec
TD0 1

===== CHANNEL f1 =====
NUC1 13C
P1 9.85 usec
PL1 -2.00 dB
SFO1 100.6228298 MHz

===== CHANNEL f2 =====
CPDPRG2 waltz16
NUC2 1H
PCPD2 100.00 usec
PL2 -5.00 dB
PL12 14.58 dB
PL13 16.00 dB
SFO2 400.1316005 MHz
SI 32768
SF 100.6127502 MHz
WDW EM
SSB 0
GB 0
PC 1.40
  
```

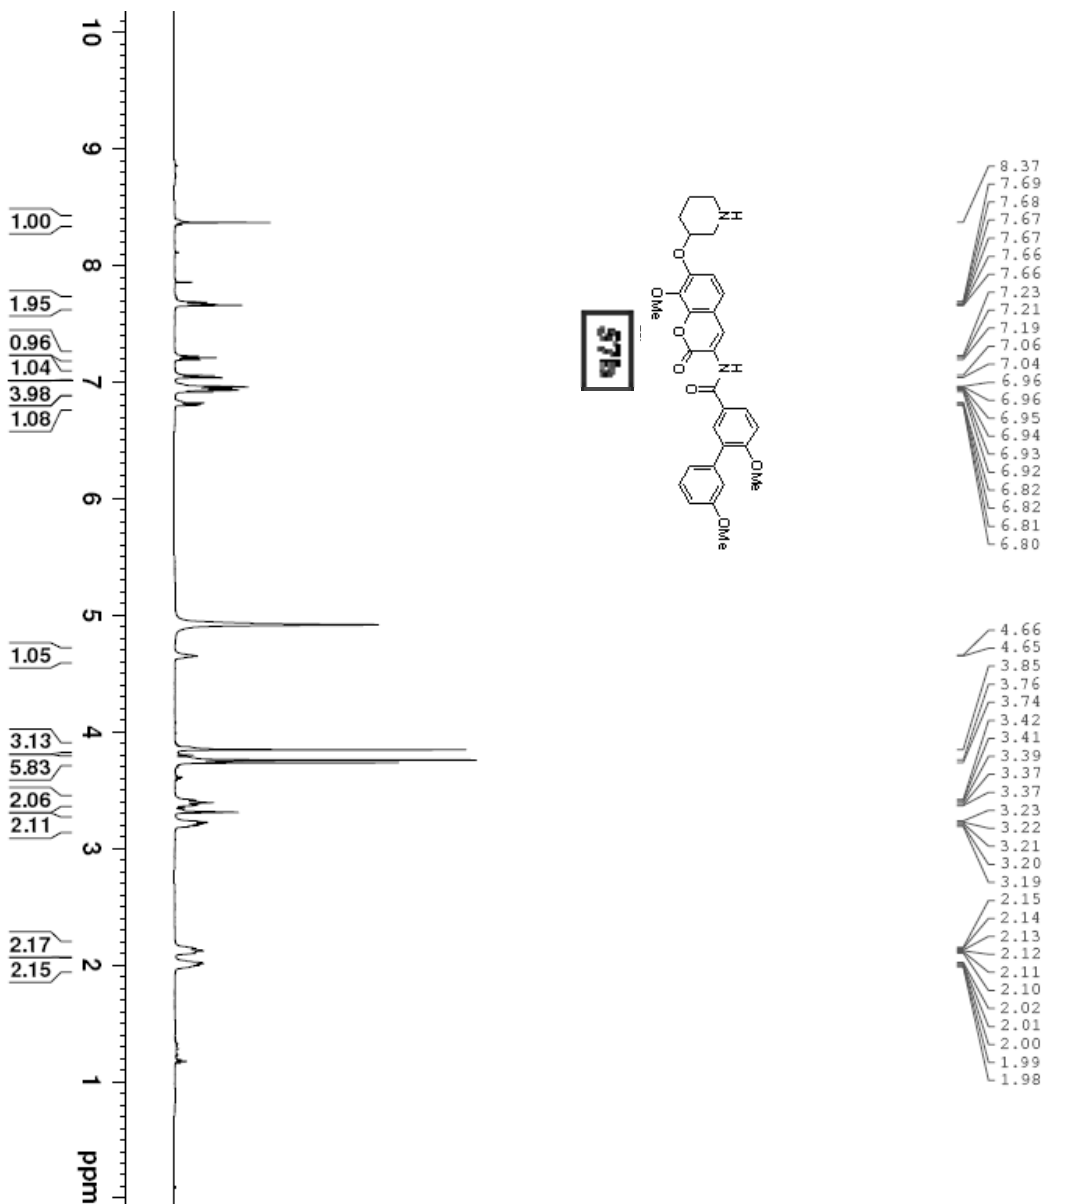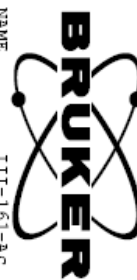

```

NAME      III-161-Ac
EXPNO     2
PROCNO    1
Date_     20090101
Time      12.26
INSTRUM   spect
PROBHD    5 mm BBO BB-1H
PULPROG   zg30
TD         65536
SOLVENT   CDCl3
NS         16
DS         2
SWH        10330.578 Hz
FIDRES     0.15732 Hz
AQ         3.1720407 sec
RG         64
DW         48.400 usec
DE         6.00 usec
TE         296.2 K
D1         1.00000000 sec
TD0        1

===== CHANNEL f1 =====
NUC1       1H
P1         8.60 usec
PL1        -5.00 dB
SFO1       500.1330885 MHz
SI         32768
SF         500.1319811 MHz
WDW        EM
SSB        0
LB         0.30 Hz
GB         0
PC         1.00
    
```

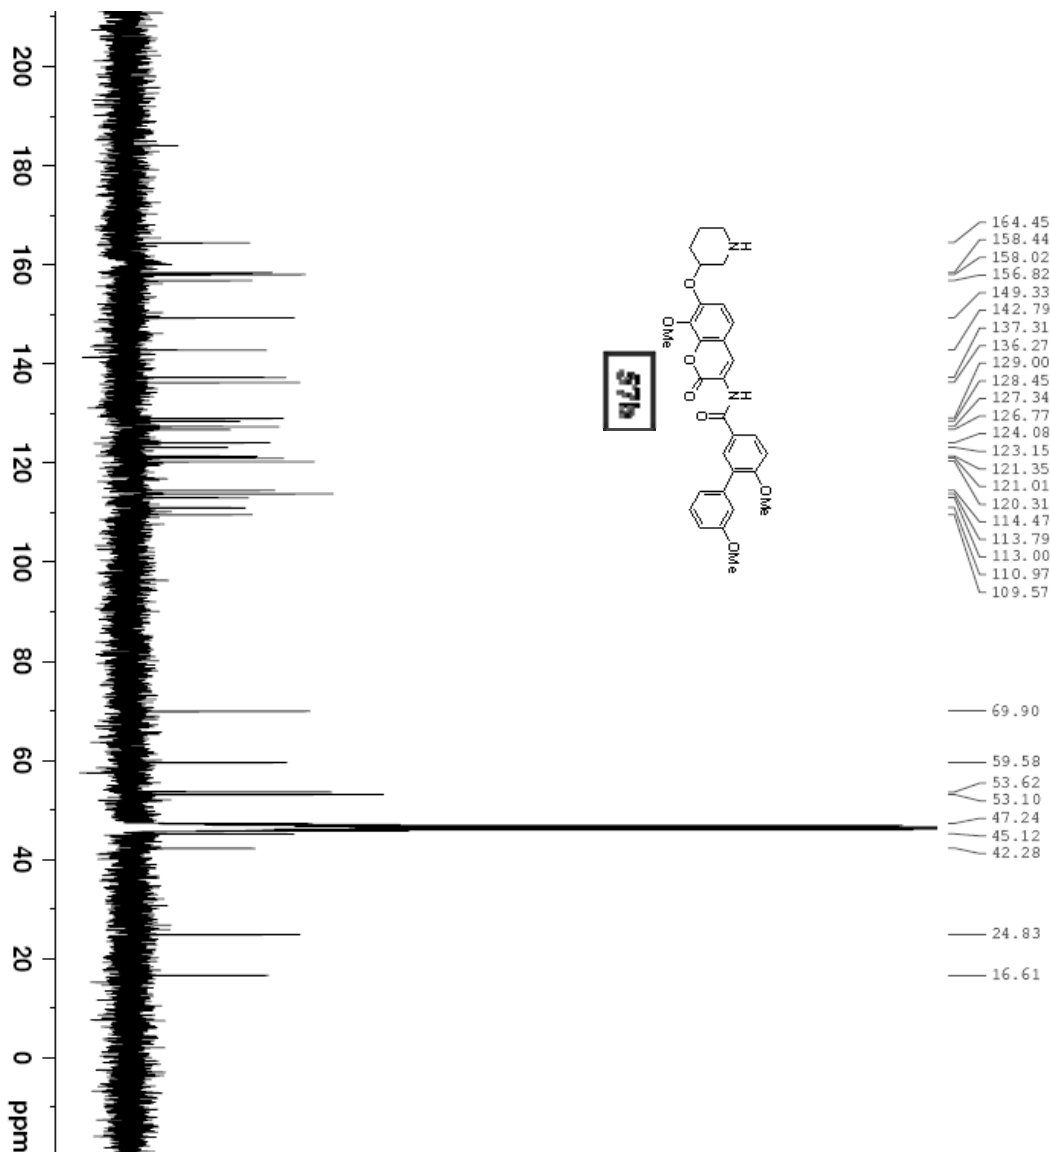

- 164.45
- 158.44
- 158.02
- 156.82
- 149.33
- 142.79
- 137.31
- 136.27
- 129.00
- 128.45
- 127.34
- 126.77
- 124.08
- 123.15
- 121.35
- 121.01
- 120.31
- 114.47
- 113.79
- 113.00
- 110.97
- 109.57

- 69.90
- 59.58
- 53.62
- 53.10
- 47.24
- 45.12
- 42.28
- 24.83
- 16.61

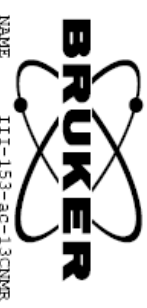

```

NAME III-153-ac-13CNER
EXPNO 1
PROCNO 1
Date_ 20081231
Time 12.36
INSTRUM drx400
PROBHD 5 mm QNP 1H/13
PULPROG zgpg30
ID zpg30
SOLVENT MeOD
NS 257
DS 4
SWH 23980.814 HZ
FIDRES 0.365918 HZ
AQ 1.3664756 sec
RG 32768
DW 20.850 usec
DE 6.00 usec
TE 296.4 K
D1 2.00000000 sec
d11 0.03000000 sec
DELTA 1.89999998 sec
TD0 2
===== CHANNEL f1 =====
NUC1 13C
P1 9.85 usec
PL1 -2.00 dB
SFO1 100.6228298 MHZ
===== CHANNEL f2 =====
CPDPRG2 waltz16
NUC2 1H
PCPD2 100.00 usec
PL2 -5.00 dB
PL12 14.58 dB
PL13 16.00 dB
SFO2 400.1316005 MHZ
SI 32768
SF 100.6127690 MHZ
WDW EM
SSB 0
LB 1.00 HZ
GB 0
PC 1.40
    
```

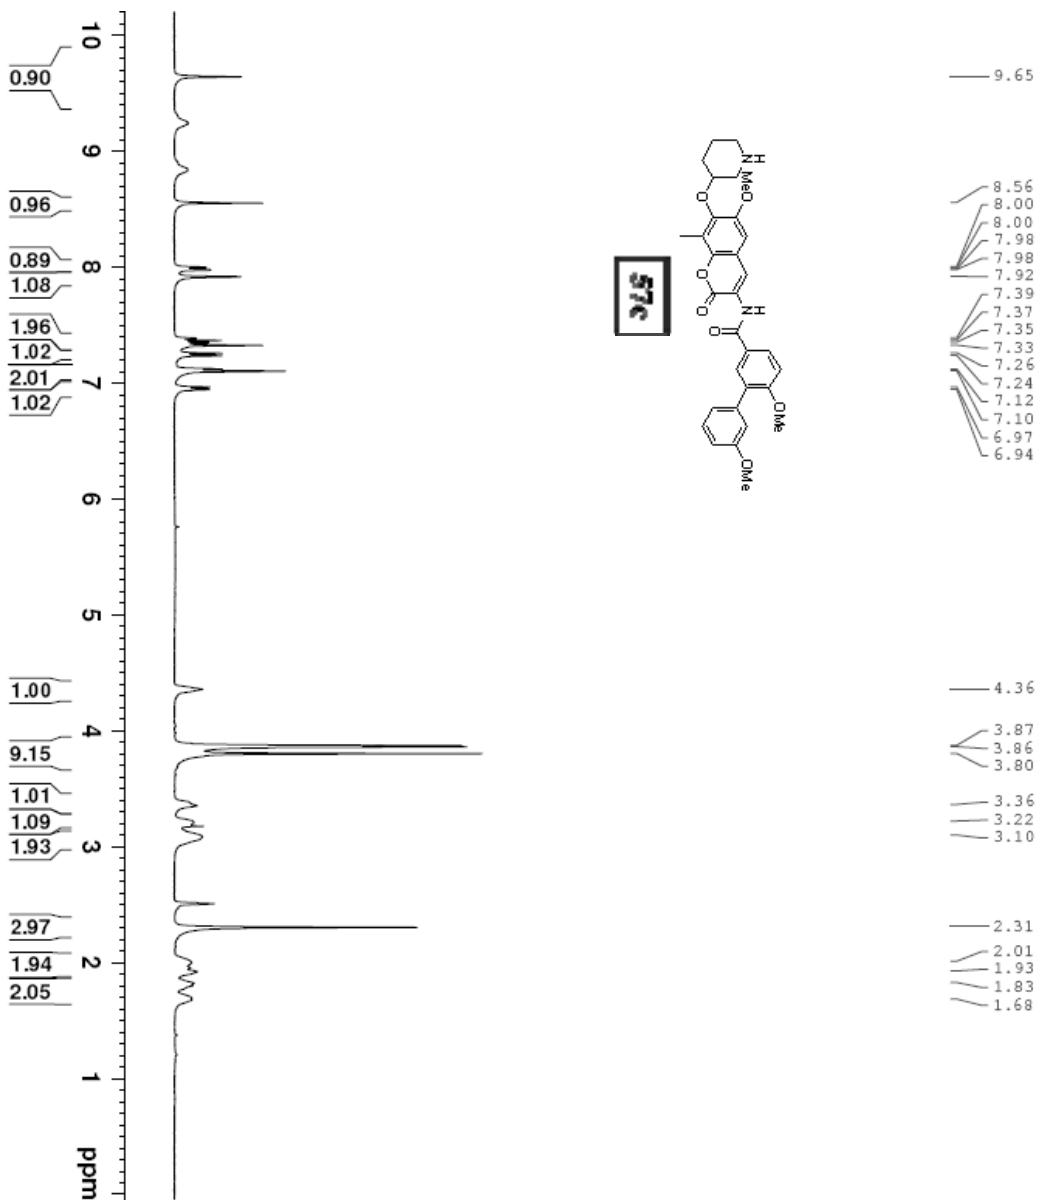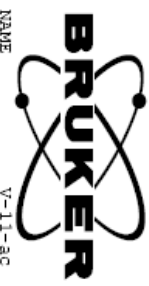

```

NAME          V-11-ac
EXNO          1
PROCNO       1
Date_        20090207
Time         18.50
INSTRUM      drx400
PROBHD       5 mm QNP 1H/13
PULPROG      zg30
TD           65536
SOLVENT      DMSO
NS           16
DS           2
SWH          8278.146 HZ
FIDRES       0.126314 HZ
AQ           3.9584243 sec
RG           4
DW           60.400 usec
DE           6.00 usec
TE           294.5 K
D1           1.00000000 sec
ID0          1

===== CHANNEL f1 =====
NUC1          1H
P1           10.50 usec
PL1          -5.00 dB
SFO1         400.1324710 MHz
SI           32768
SF           400.1300000 MHz
WDW          EM
SSB          0
LB           0.30 HZ
GB           0
PC           1.00
    
```

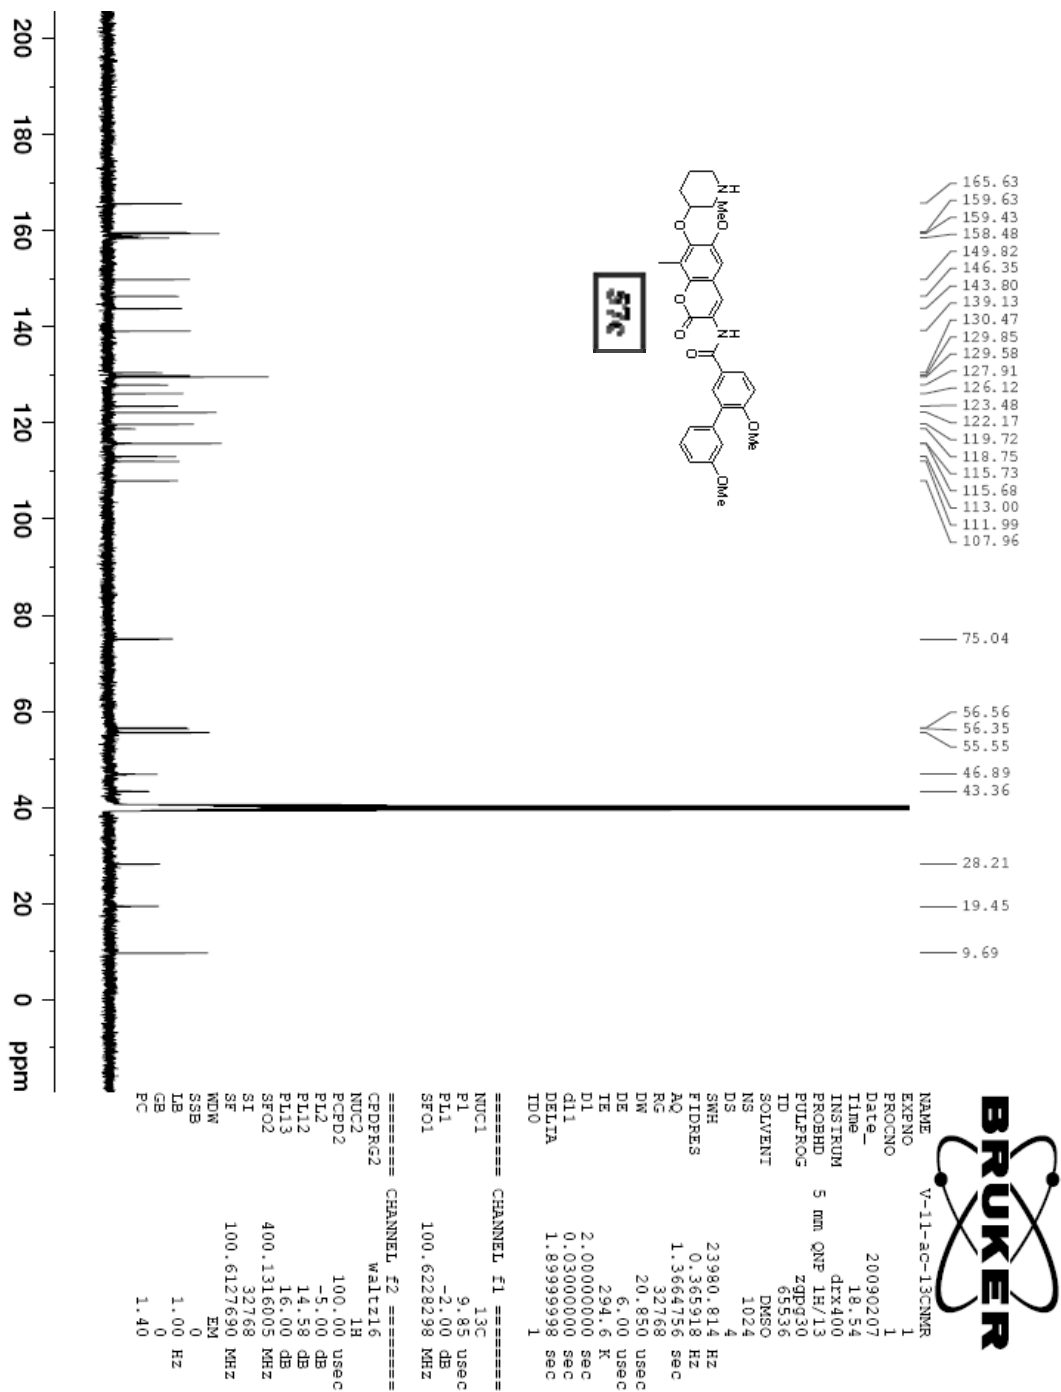



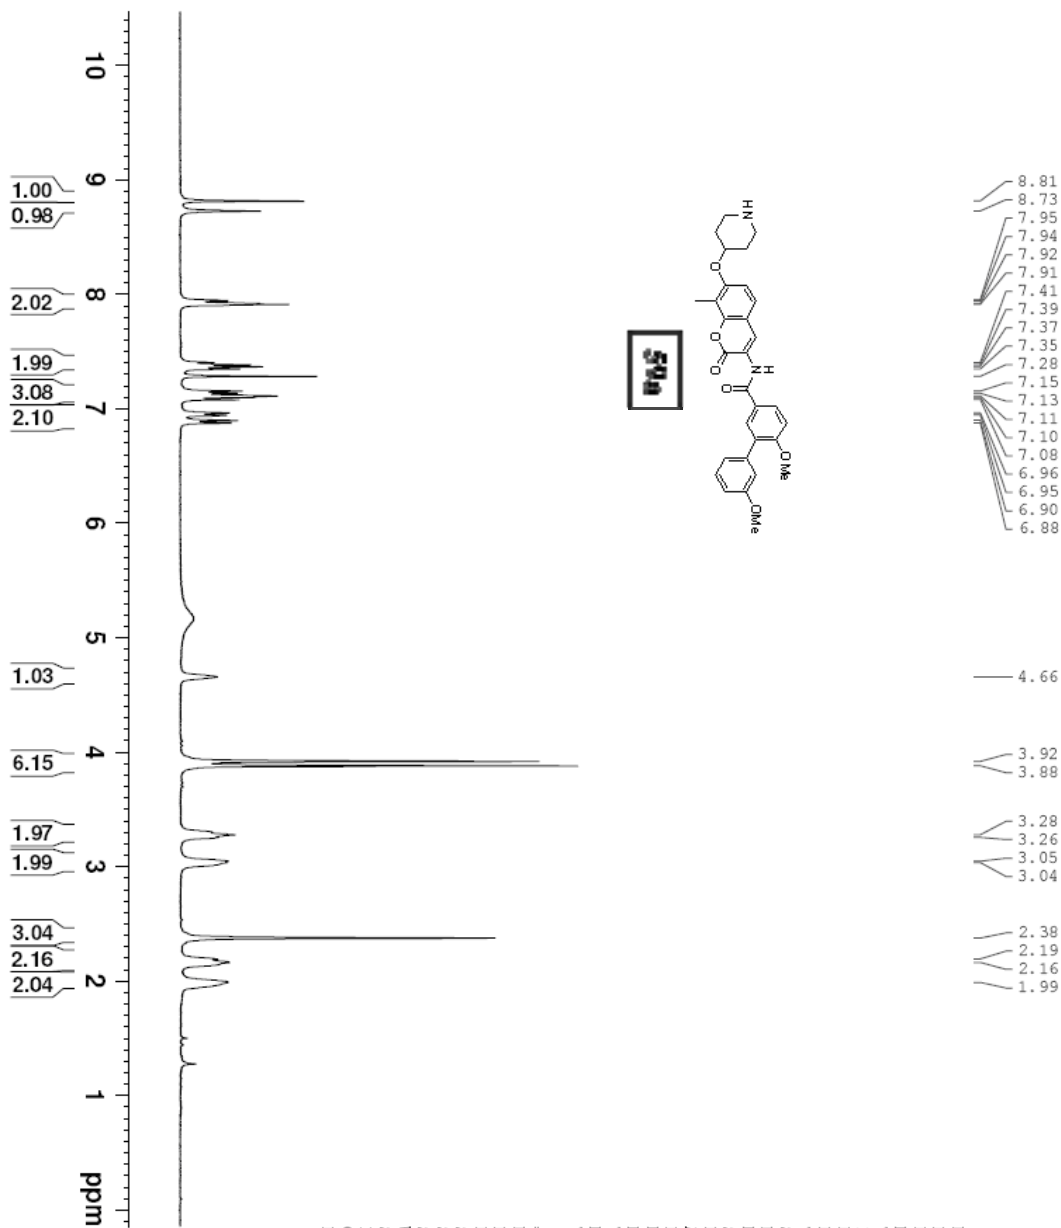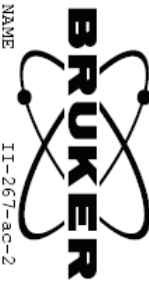

```

NAME      II-267-ac-2
EXPNO    1
PROCNO   1
Date_    20081029
Time     11.43
INSTRUM  dx400
PROBHD   5 mm QNP 1H/13
PULPROG  zg30
TD        65536
SOLVENT  CDCl3
NS        16
DS        2
SWH       8278.146 Hz
FIDRES    0.126314 Hz
AQ         3.9584243 sec
RG         4
DE         60.400 usec
TE         294.1 K
D1         1.00000000 sec
TD0        1
    
```

```

===== CHANNEL f1 =====
NUC1      1H
P1        10.50 usec
PL1       -5.00 dB
SFO1      400.1324710 MHz
SI        32768
SF         400.1300000 MHz
WDW       EM
SSB       0
LB         0.30 Hz
GB         0
PC         1.00
    
```

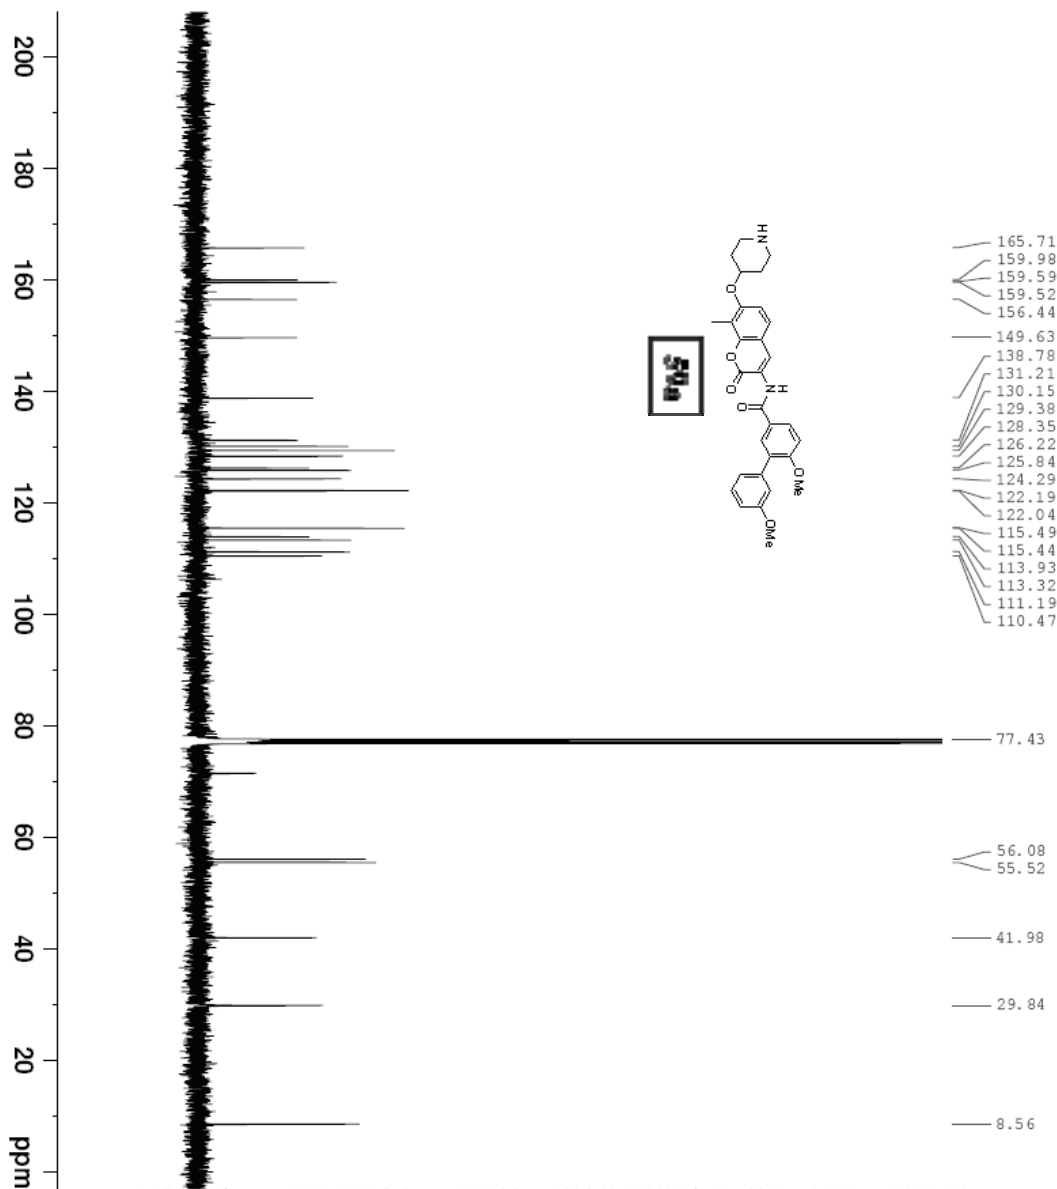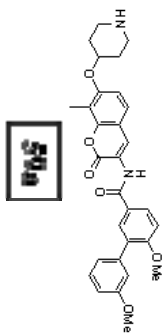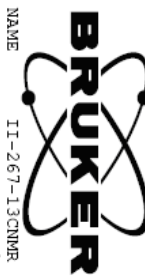

NAME II-267-13CNMR  
 EXPNO 1  
 PROCNO 1  
 Date\_ 20081029  
 Time\_ 21.06  
 INSTRUM dx400  
 PROBHD 5 mm QNP 1H/13  
 PULPROG zgpg30  
 TD 65536  
 SOLVENT CDCl3  
 NS 1024  
 DS 4  
 SWH 23980.814 Hz  
 FIDRES 0.365918 Hz  
 AQ 1.3664756 sec  
 RG 32768  
 DW 20.850 usec  
 DE 6.00 usec  
 TE 294.5 K  
 D1 2.0000000 sec  
 d11 0.0300000 sec  
 DELTA 1.89999998 sec  
 TD0 1

===== CHANNEL f1 =====  
 NUC1 13C  
 P1 9.85 usec  
 PL1 -2.00 dB  
 SFO1 100.628298 MHz

===== CHANNEL f2 =====  
 CPDPRG2 waltz16  
 NUC2 1H  
 PCPD2 100.00 usec  
 PL2 -5.00 dB  
 PL12 14.58 dB  
 PL13 16.00 dB  
 SE02 400.1316005 MHz  
 SI 32768  
 SF 100.6127509 MHz  
 WDW EM  
 SSB 0  
 GB 1.00 Hz  
 PC 0  
 PC 1.40

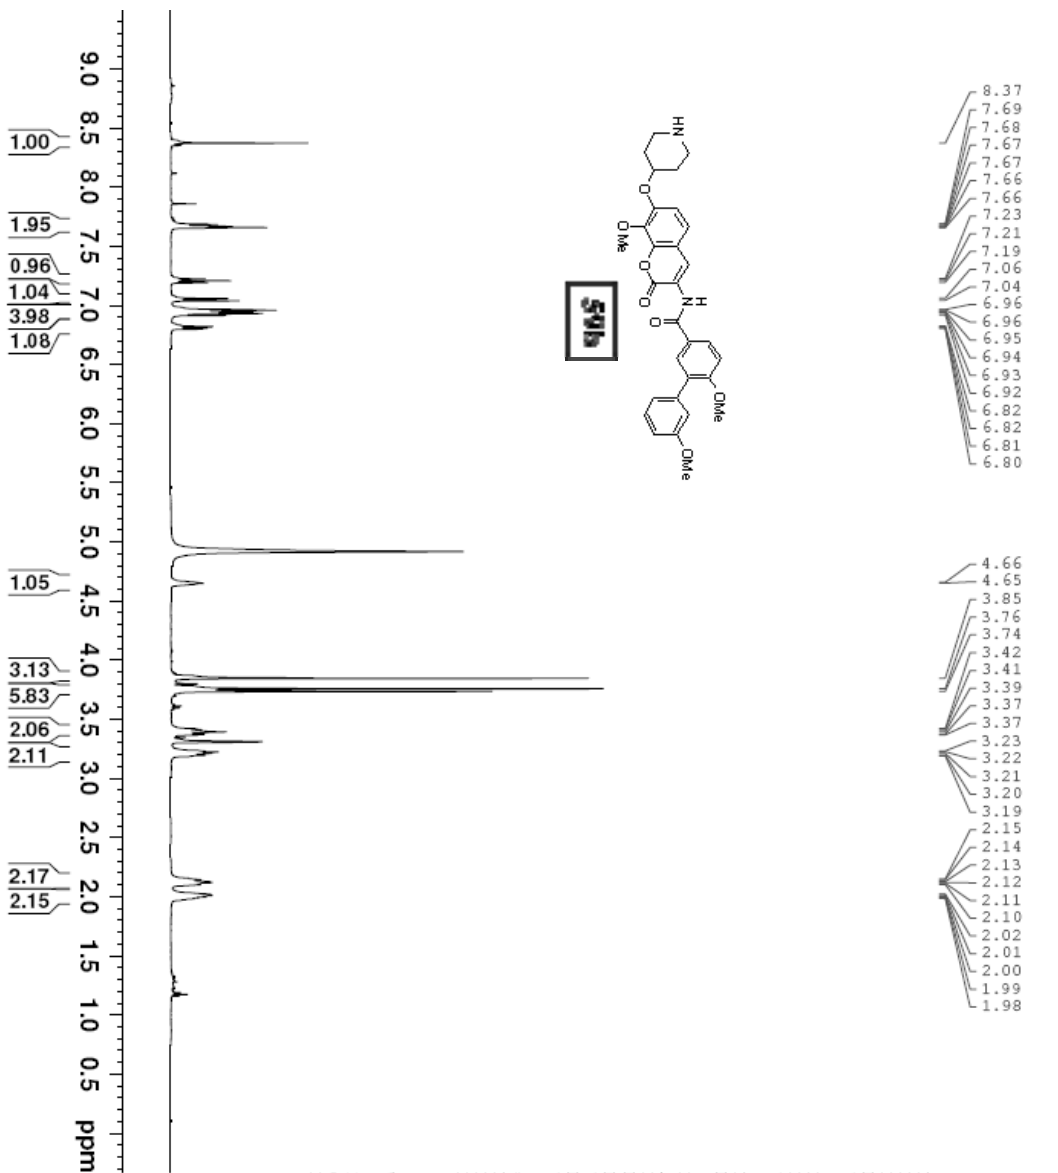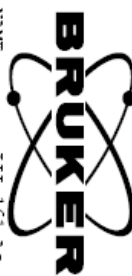

```

NAME III-161-AC
EXPNO 2
PROCNO 1
Date_ 20090101
Time 12:26
INSTRUM spect
PROBHD 5 mm BBO BB-1H
PULPROG zg30
TD 65536
SOLVENT CDCl3
NS 16
DS 2
SWH 10330.578 Hz
FIDRES 0.157632 Hz
AQ 3.1720407 sec
RG 64
RG 64
DW 48.400 Usec
DE 6.00 Usec
TE 296.2 K
D1 1.00000000 sec
ID0 1

===== CHANNEL f1 =====
NUC1 1H
P1 8.60 Usec
PL1 -5.00 dB
SFO1 500.1300885 MHz
SI 32768
SF 500.1319811 MHz
WDW EM
SSB 0
LB 0.30 Hz
GB 0
PC 1.00
    
```

8.37  
7.69  
7.68  
7.67  
7.66  
7.66  
7.23  
7.21  
7.19  
7.06  
7.04  
6.96  
6.95  
6.94  
6.93  
6.92  
6.82  
6.82  
6.81  
6.80

4.66  
4.65  
3.85  
3.76  
3.74  
3.42  
3.41  
3.39  
3.37  
3.37  
3.23  
3.22  
3.21  
3.20  
3.19  
2.15  
2.14  
2.13  
2.12  
2.11  
2.10  
2.02  
2.01  
2.00  
1.99  
1.98

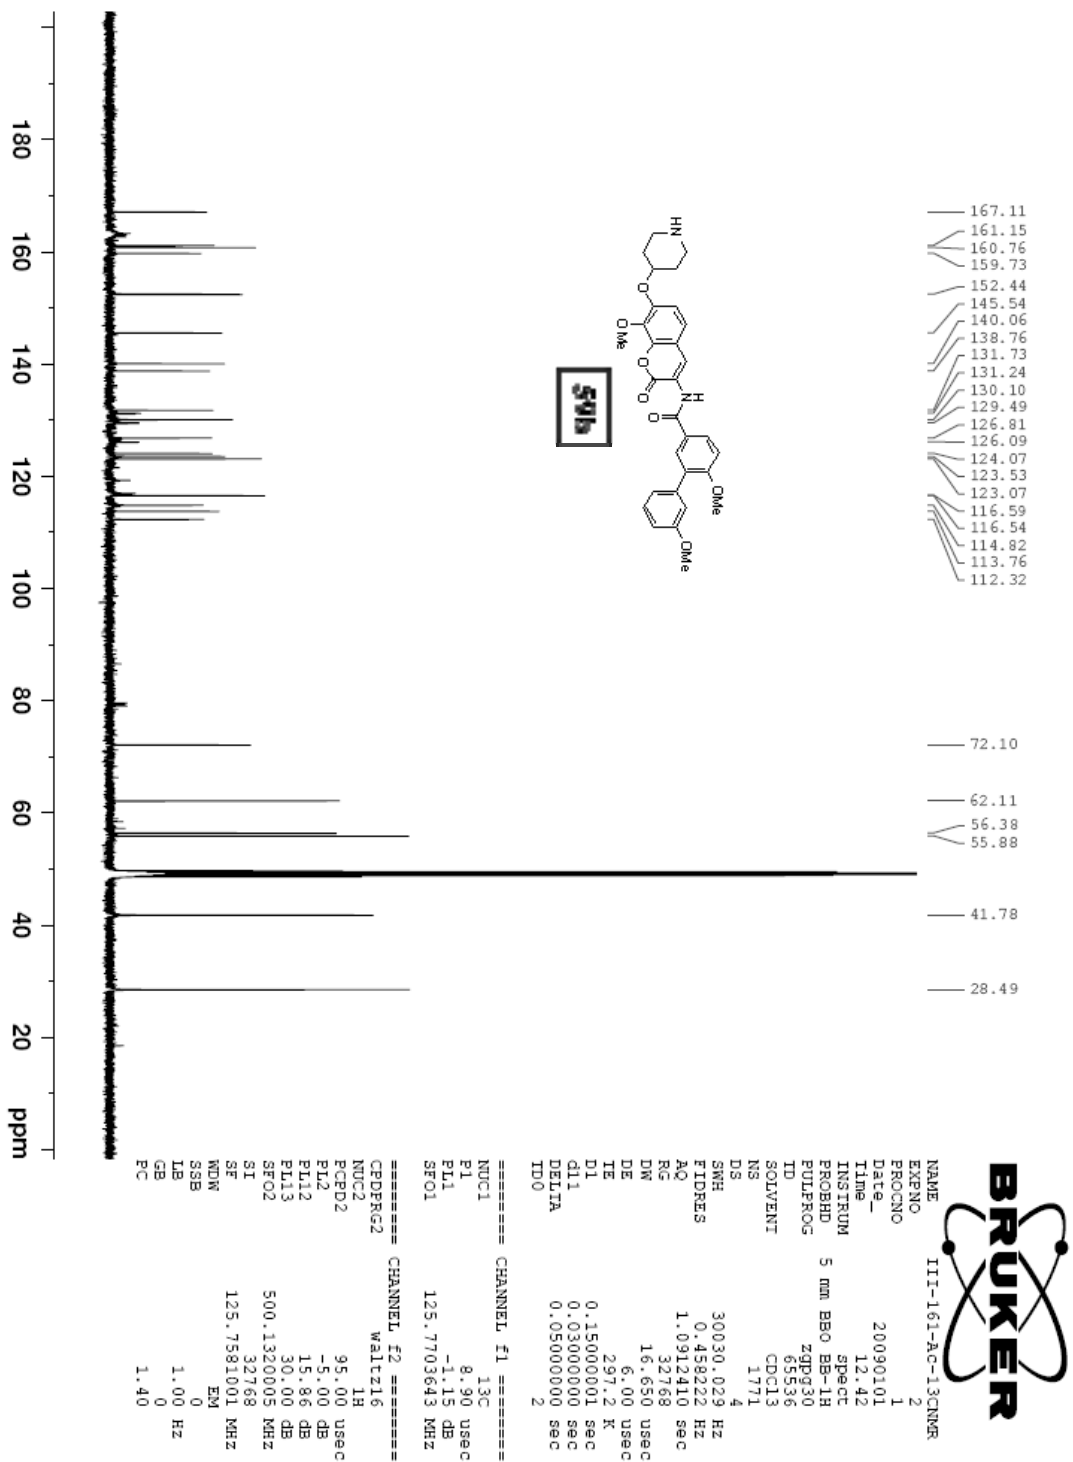

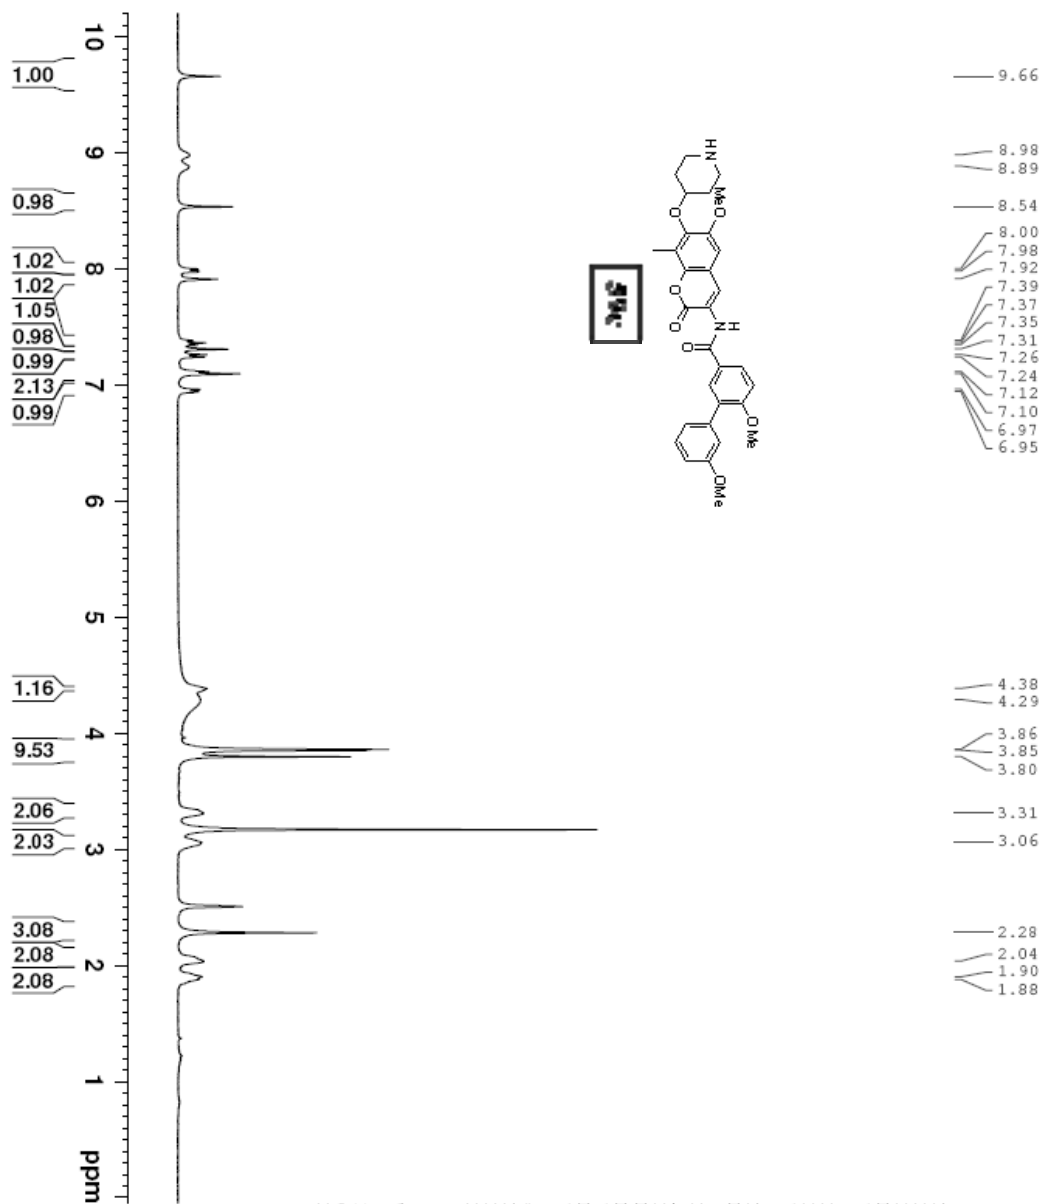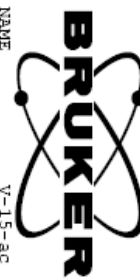

```

NAME V-15-ac
EXPNO 1
PROCNO 1
Date_ 20090207
Time 21.11
INSTRUM dx400
PROBHD 5 mm QNP 1H/13
PULPROG zgpg30
TD 65536
SOLVENT DMSO
NS 16
DS 2
SWH 8278.146 HZ
FIDRES 0.126314 HZ
AQ 3.9584243 sec
RG 4
DW 60.400 usec
DE 6.00 usec
TE 294.4 K
D1 1.00000000 sec
ID0 1

===== CHANNEL f1 =====
NUC1 1H
P1 10.50 usec
PL1 -5.00 dB
SFO1 400.1324710 MHz
SI 32768
SF 400.1300000 MHz
WDW EM
SSB 0
LB 0.30 HZ
GB 0
PC 1.00
    
```

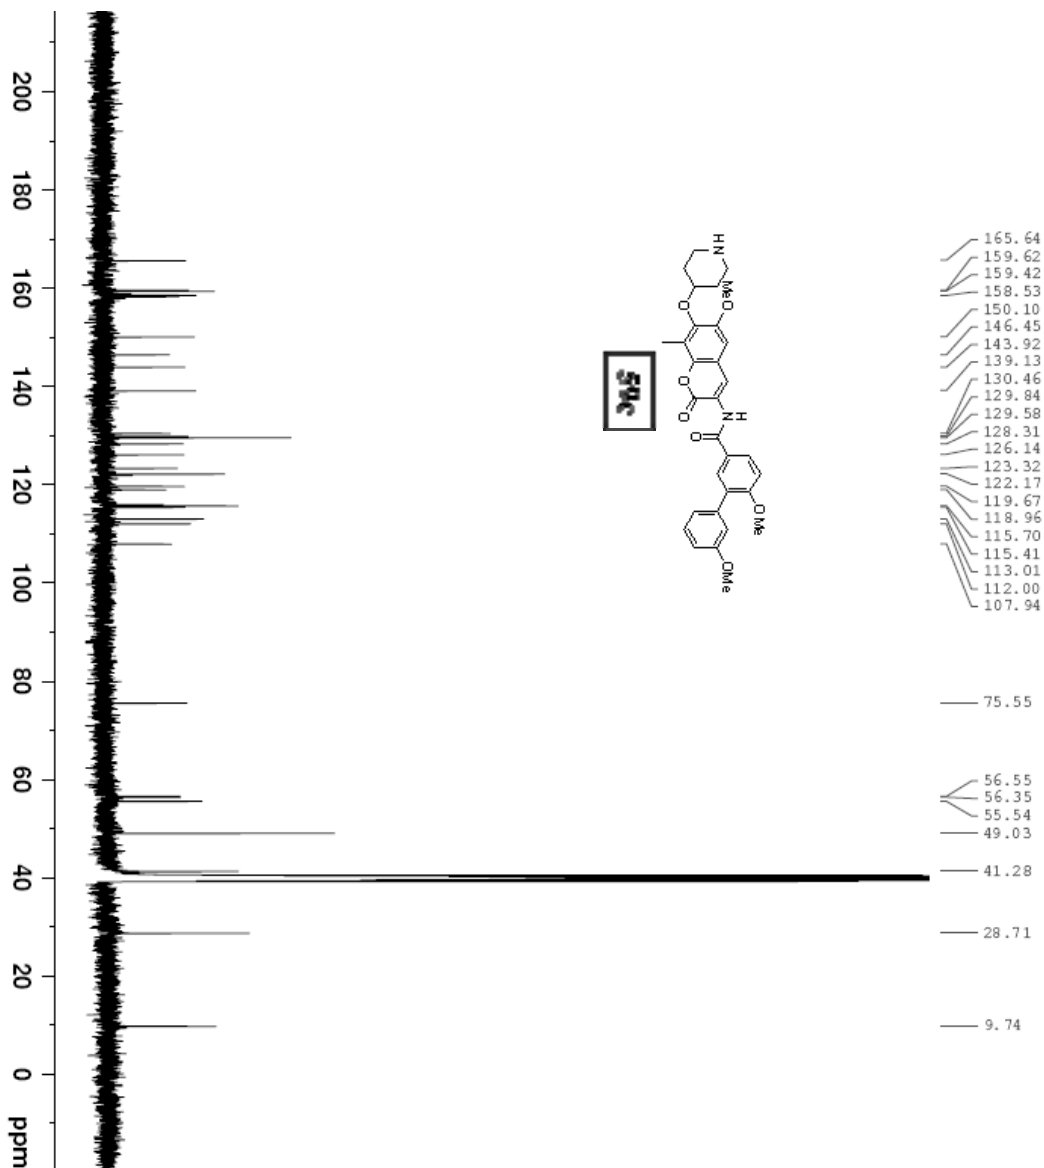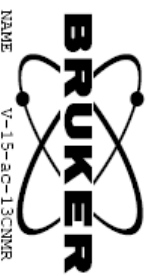

```

NAME          V-15-ac-13CNMR
EXPNO         1
PROCNO        1
Date_         20090207
Time         23.19
INSTRUM       dx400
PROBHD        5 mm QNP 1H/13
PULPROG       zgpg30
TD            65536
SOLVENT       DMSO
NS            2370
DS            4
SWH           23980.814 Hz
FIDRES        0.365918 Hz
AQ            1.3664756 sec
RG            32768
DM            20.850 usec
DE            6.00 usec
TE            294.4 K
D1            2.00000000 sec
d11           0.03000000 sec
DELTA         1.89999998 sec
TD0           2
===== CHANNEL f1 =====
NUC1          13C
P1            9.85 usec
PL1           -2.00 dB
SFO1         100.6228298 MHz
===== CHANNEL f2 =====
CPDPRG2      waltz16
NUC2          1H
PCPD2        100.00 usec
PL2           -5.00 dB
PL12         14.58 dB
PL13         16.00 dB
SFO2         400.1316005 MHz
SI           32768
SF           100.6127690 MHz
WDW           EM
SSB           0
LB            1.00 Hz
GB            0
PC            1.40
    
```

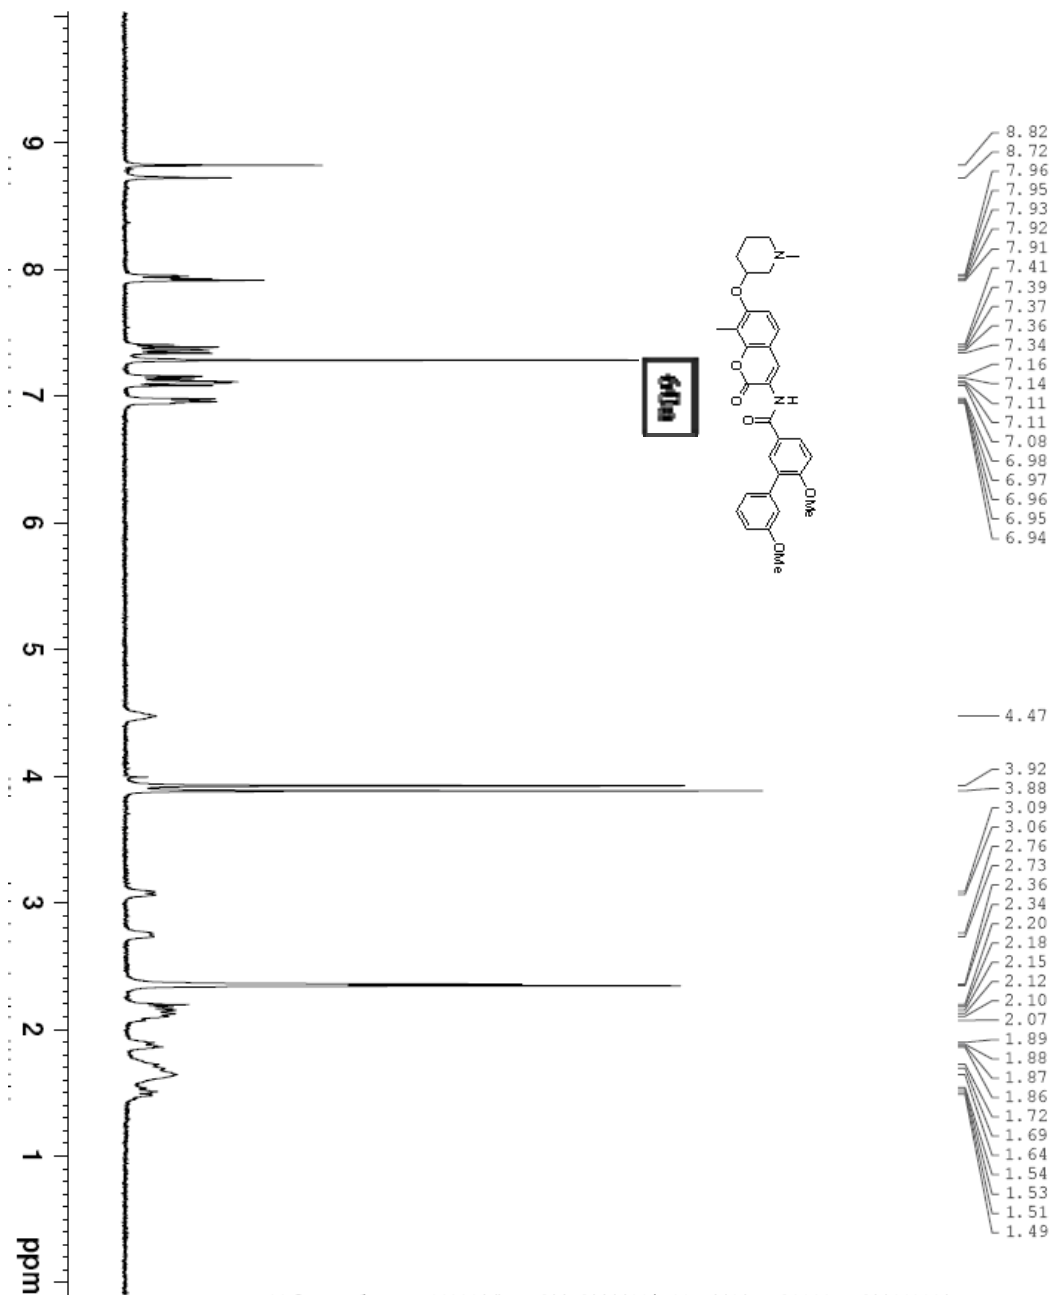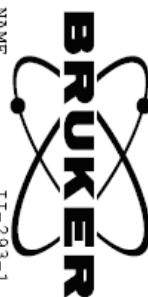

```

NAME II-293-1
EXPNO 1
PROCNO 1
Date_ 20081108
Time 0.26
INSTRUM dxr400
PROBHD 5 mm QNP 1H/13
PULPROG zgpg30
TD 65536
SOLVENT CDCl3
NS 16
DS 2
SWH 8278.146 Hz
FIDRES 0.126314 Hz
AQ 3.9584243 sec
RG 4
DW 60.400 usec
DE 6.00 usec
TE 295.8 K
D1 1.00000000 sec
TD0 1
    
```

```

===== CHANNEL f1 =====
NUC1 1H
P1 10.50 usec
PL1 -5.00 dB
SFO1 400.1324710 MHz
SI 32768
SF 400.1300000 MHz
WDW EM
SSB 0
LB 0.30 Hz
GB 0
PC 1.00
    
```

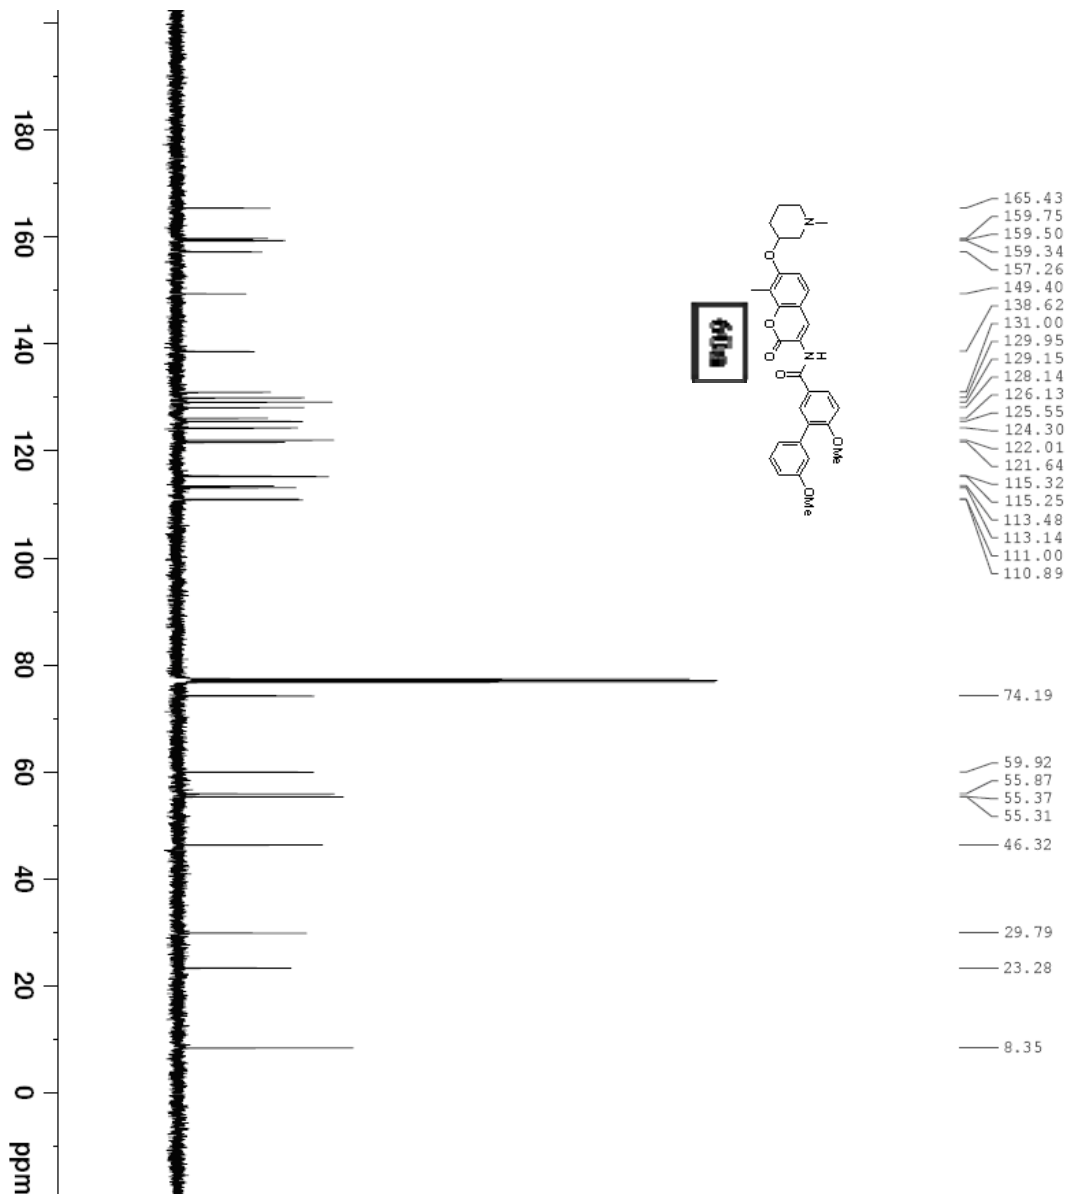

165.43  
159.75  
159.50  
159.34  
157.26  
149.40  
138.62  
131.00  
129.95  
129.15  
128.14  
126.13  
125.55  
124.30  
122.01  
121.64  
115.32  
115.25  
113.48  
113.14  
111.00  
110.89

74.19  
59.92  
55.87  
55.37  
55.31  
46.32  
29.79  
23.28  
8.35

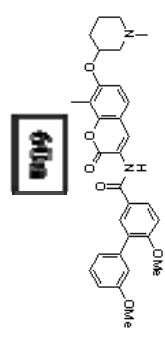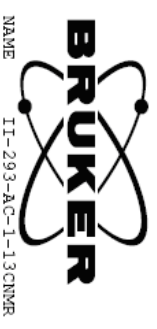

```

NAME      II-293-AC-1-13CNMR
EXPNO     1
PROCNO    1
Date_     20091106
Time      10.23
INSTRUM   dx400
PROBHD    5 mm QNP 1H/13
PULPROG   zgpg30
TD         65536
SOLVENT   CDCl3
NS         210
DS         4
SWH        23980.814 Hz
FIDRES     0.365918 Hz
AQ         1.3664756 sec
RG         32768
DE         20.850 usec
TE         297.5 K
D1         2.00000000 sec
d11        0.03000000 sec
DELTA     1.89999998 sec
ID0        1
    
```

```

===== CHANNEL f1 =====
NUC1      13C
P1        9.85 usec
PL1       -2.00 dB
SFO1     100.6228298 MHz
    
```

```

===== CHANNEL f2 =====
CPDPRG2   waltz16
NUC2      1H
P2        100.00 usec
PL2       -5.00 dB
PL12      14.58 dB
PL13      16.00 dB
SFO2     400.1316005 MHz
SI        32768
SF        100.6127690 MHz
WDW       EM
SSB       0
LB        1.00 Hz
GB        0
PC        1.40
    
```



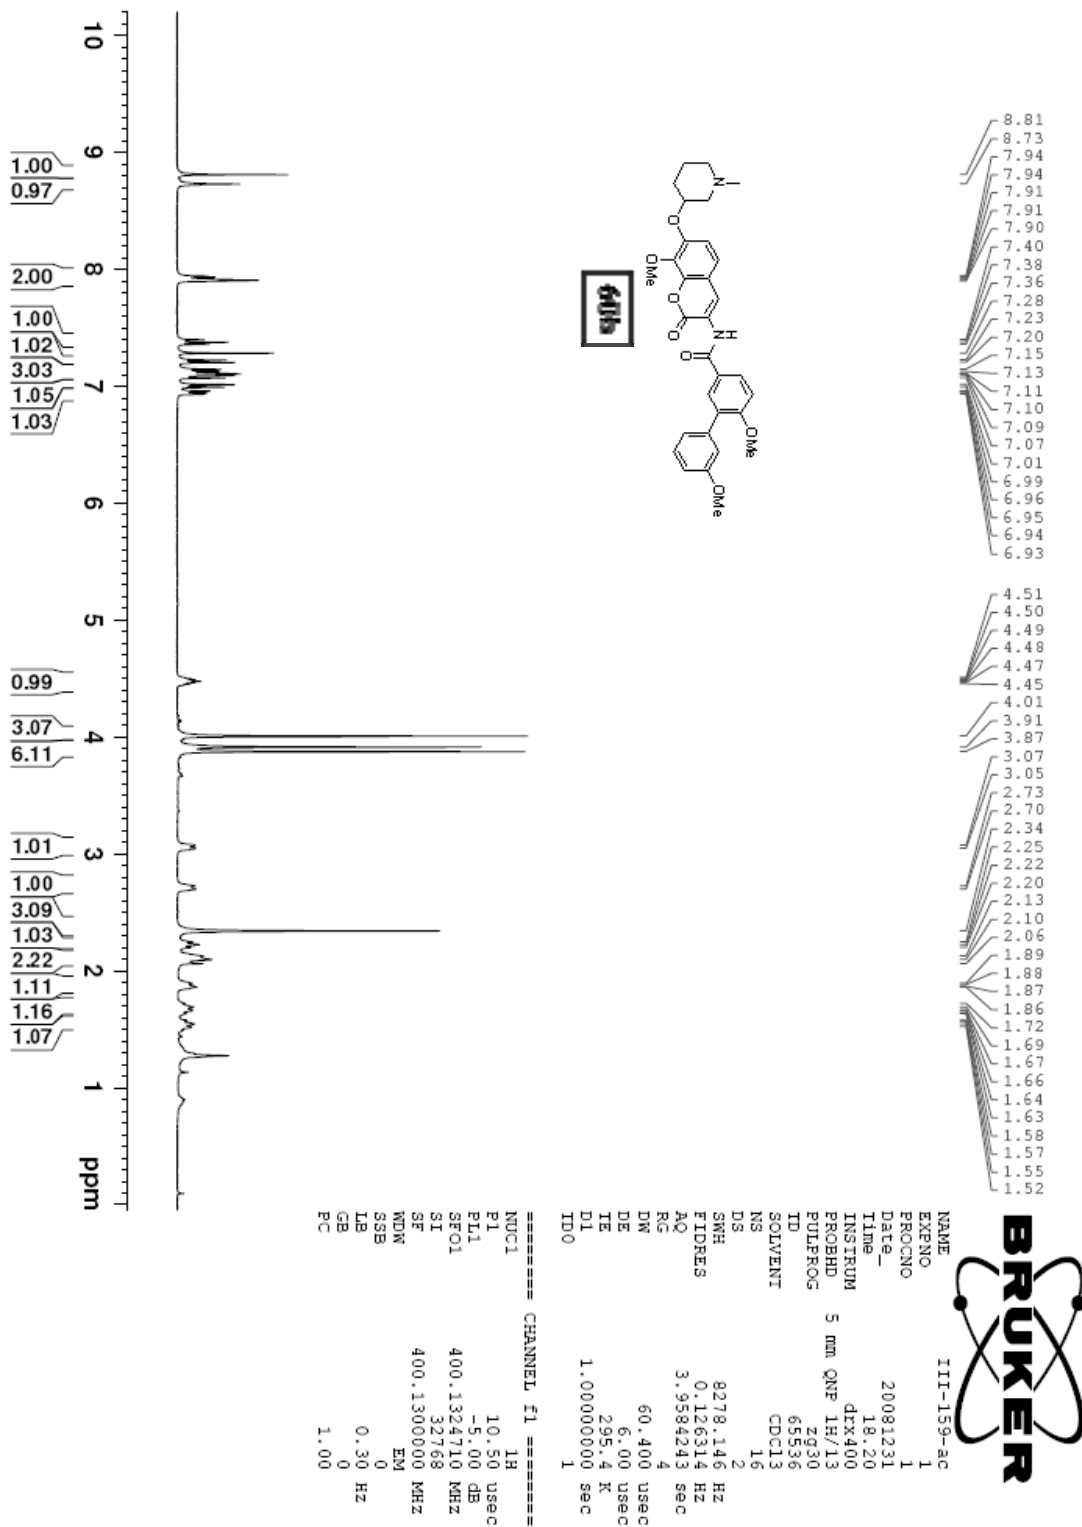

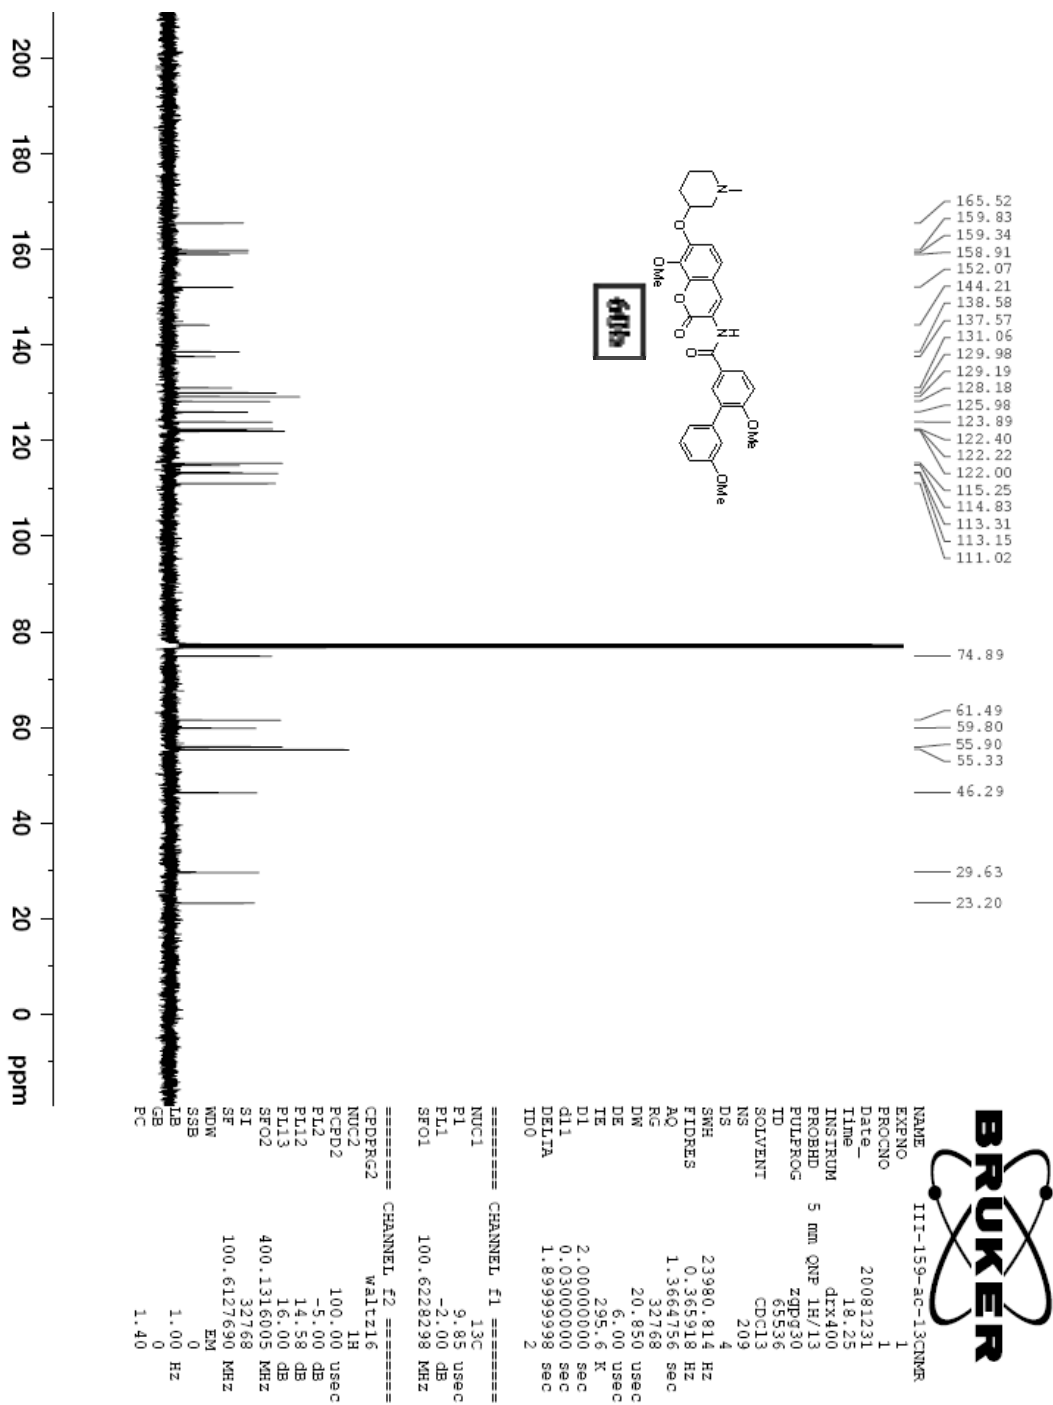

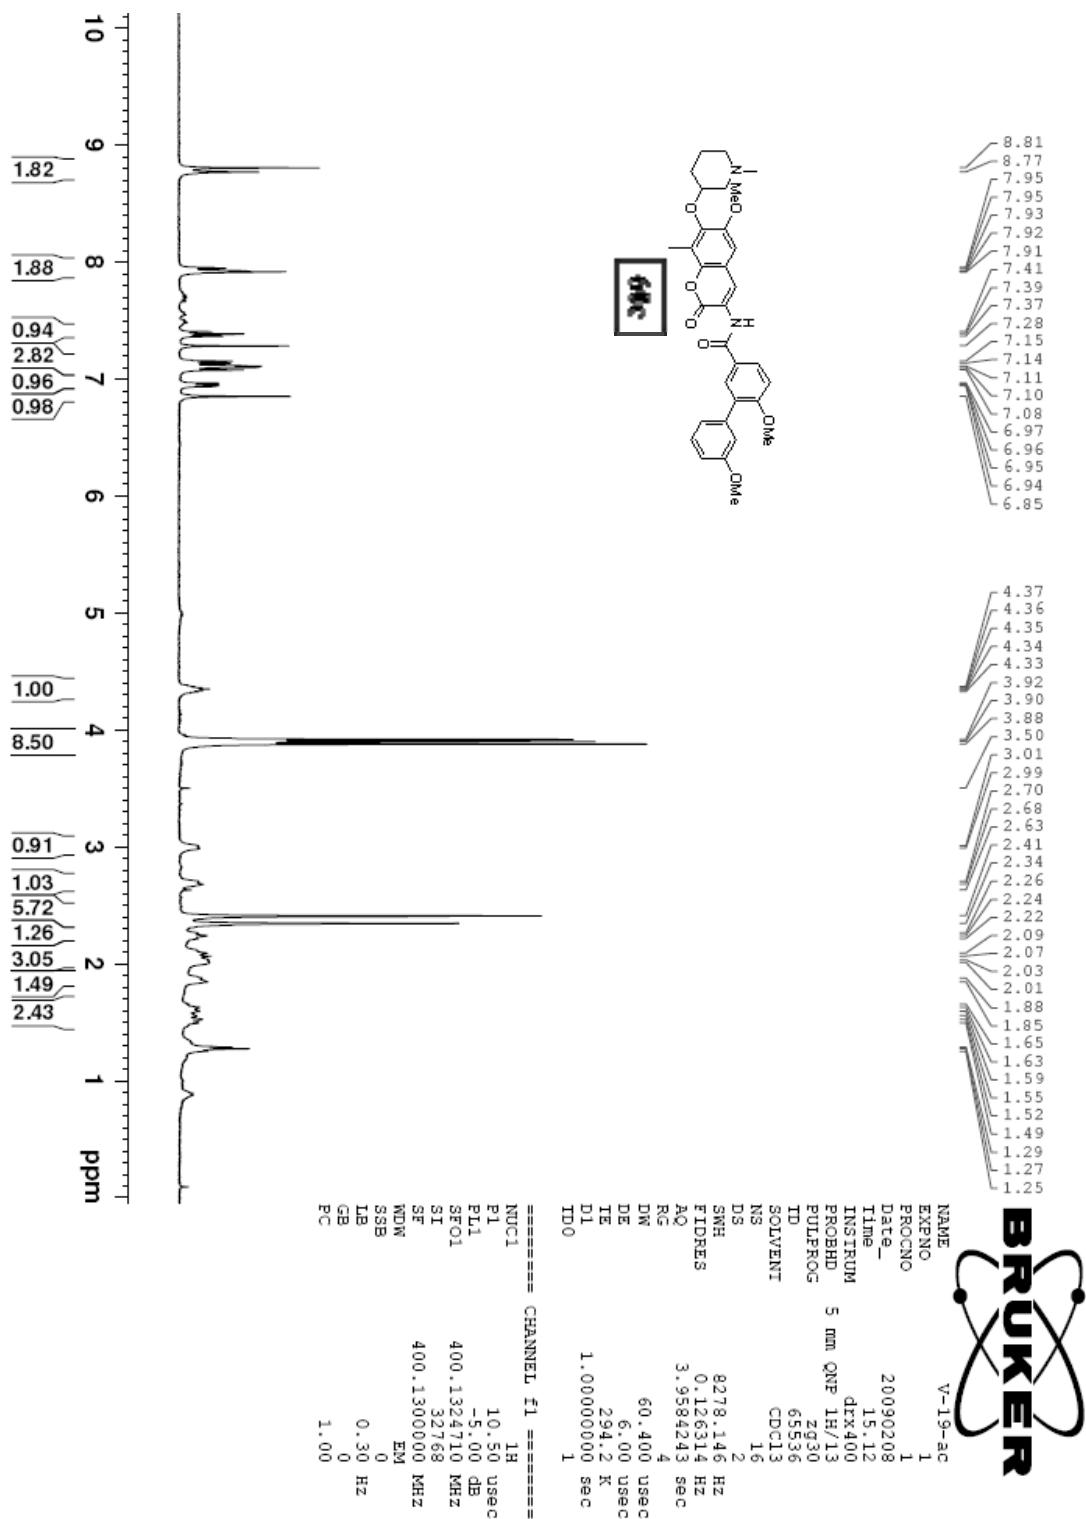

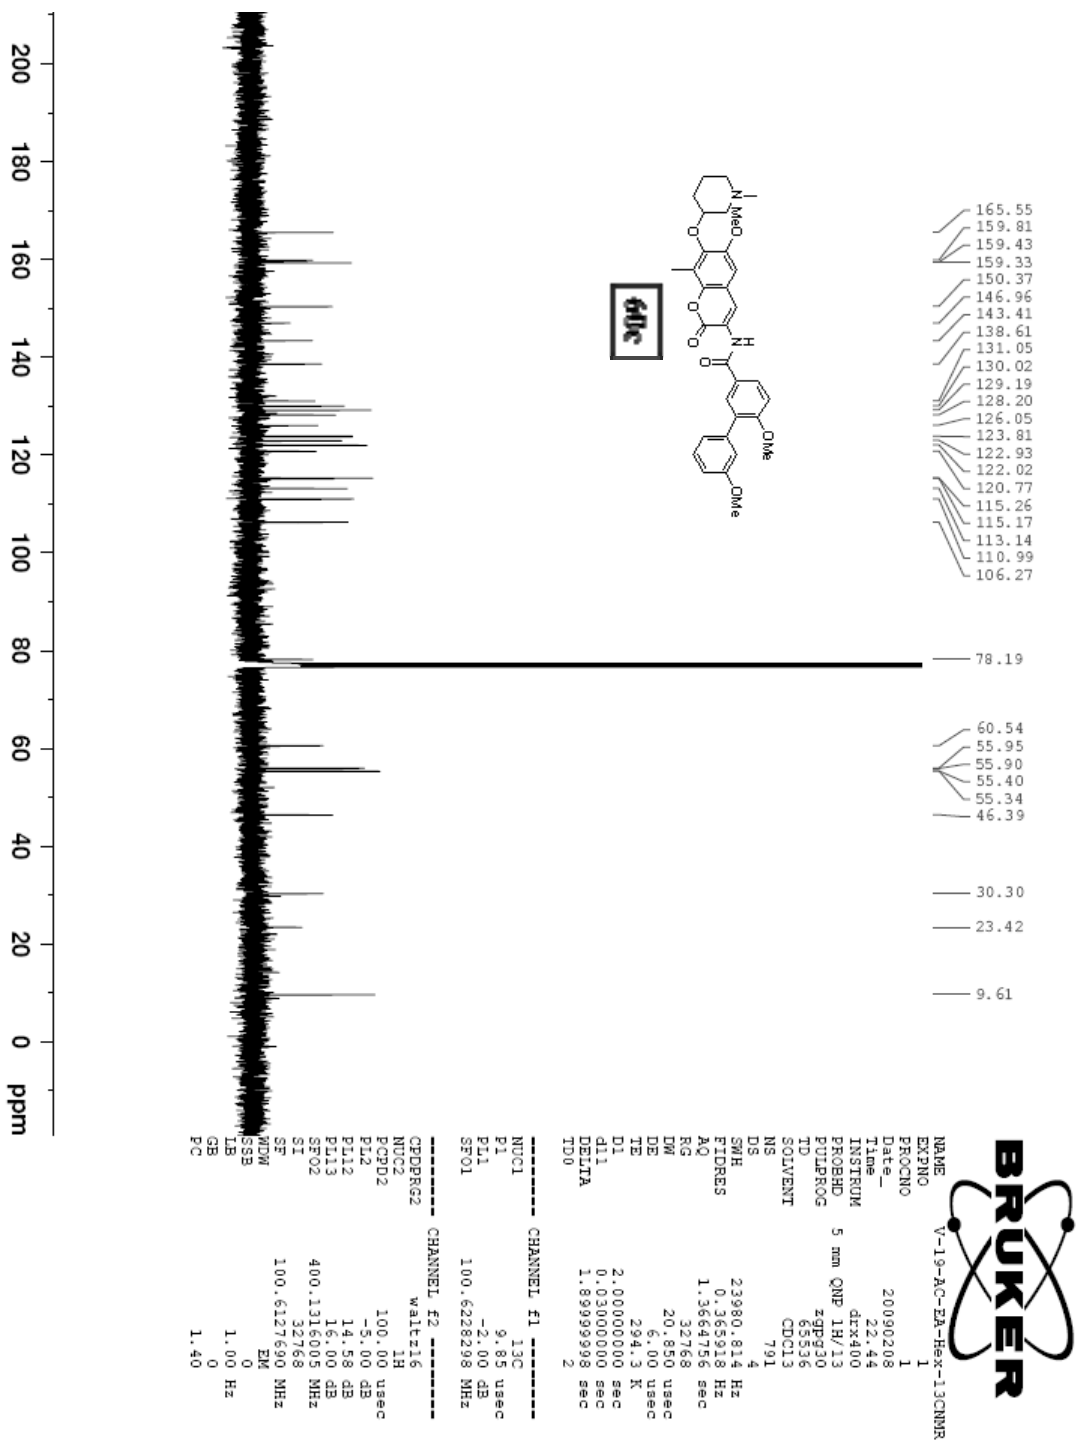

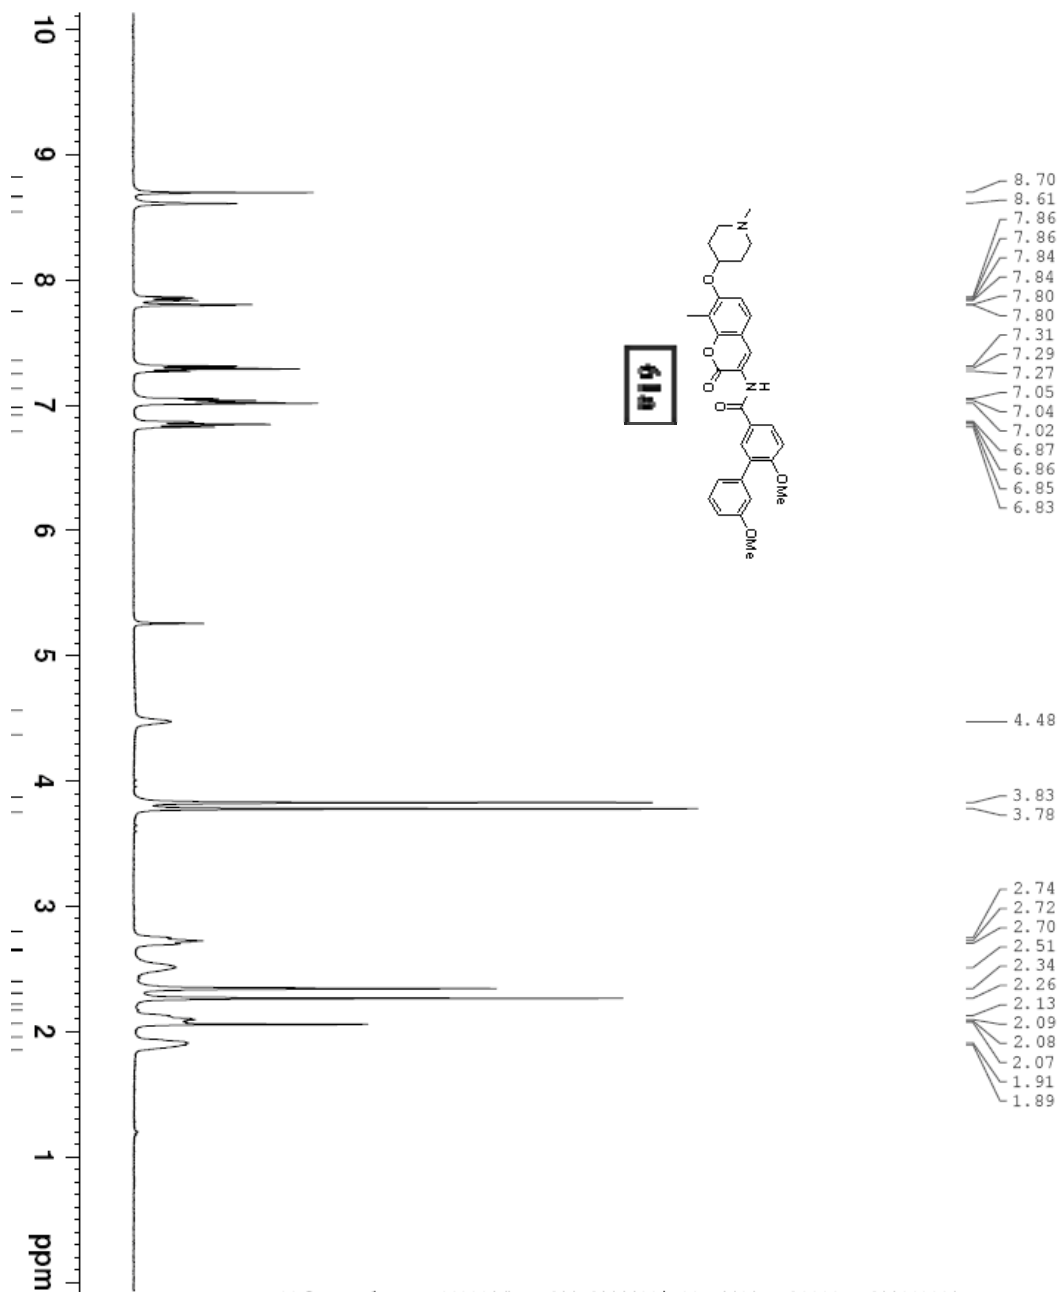

**BRUKER**

II-279-sol1.d

NAME  
EXPNO 1  
PROCNO 1  
Date\_ 20081101  
Time\_ 22.21  
INSTRUM 5 mm QNP 1H/13  
PROBHD zg30  
PULPROG zg30  
TD 65536  
SOLVENT CD2Cl2  
NS 16  
DS 2  
SWH 8278.146  
FIDRES 0.126314  
AQ 3.9584243  
RG 4  
DW 60.400  
DE 6.00  
TE 294.4  
D1 1.00000000  
TD0 1

==== CHANNEL f1 =====  
NUC1 1H  
P1 10.50  
PL1 5.00  
SF01 400.1324710  
SI 32768  
SF 400.1300401  
WDW EM  
SSB 0  
LB 0.30  
GB 0  
PC 1.00

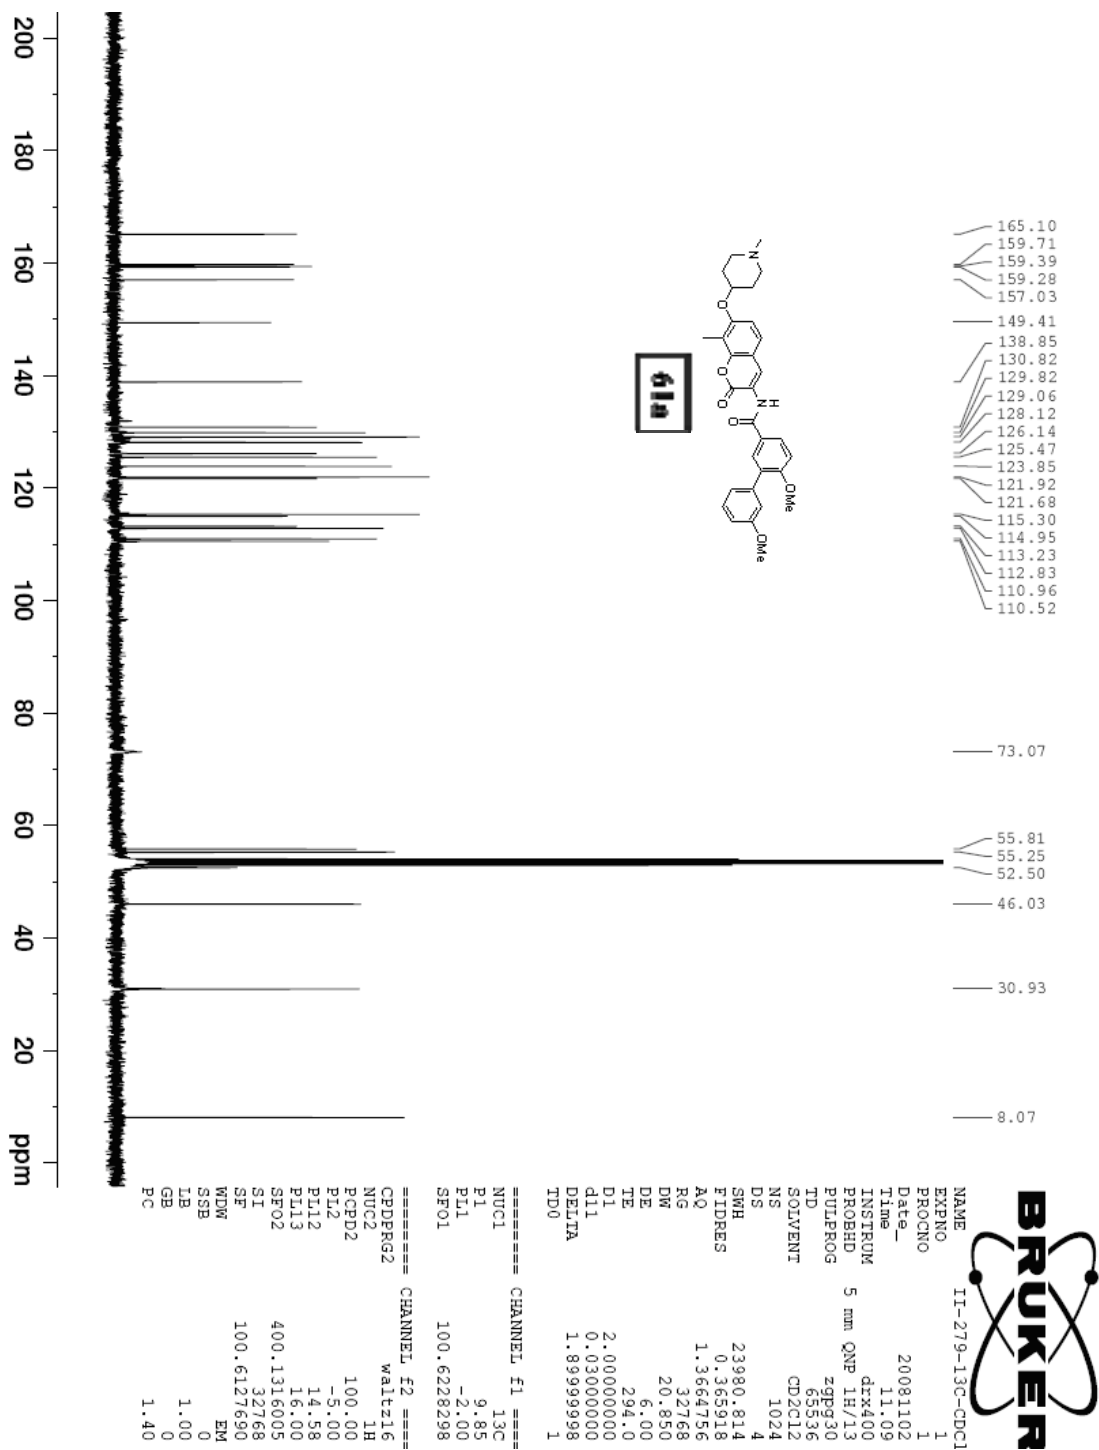

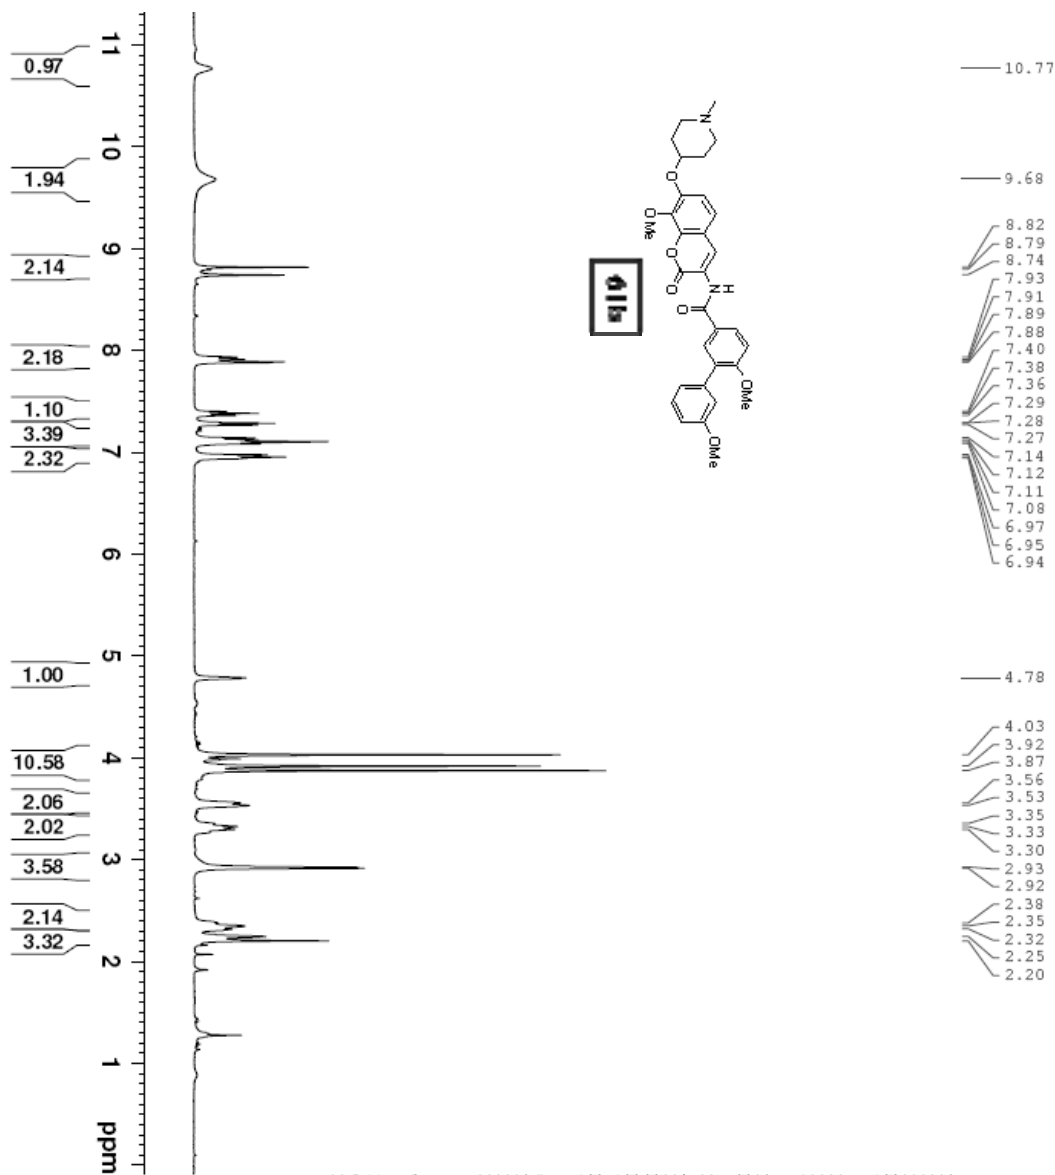

**41b**

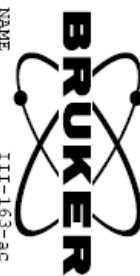

```

NAME III-163-ac
EXPNO 1
PROCNO 1
Date_ 20090101
Time_ 17.31
INSTRUM dkk400
PROBHD 5 mm QNP 1H/13
PULPROG zg30
TD 65536
SOLVENT CDCl3
NS 16
DS 2
SWH 8278.146 HZ
FIDRES 0.126314 HZ
AQ 3.9584243 sec
RG 4
DM 60.400 usec
DE 6.00 usec
TE 295.6 K
D1 1.00000000 sec
ID0 1

===== CHANNEL f1 =====
NUC1 1H
P1 10.50 usec
PL1 -5.00 dB
SFO1 400.1324710 MHz
SI 32768
SF 400.1300000 MHz
WDW EM
SSB 0
LB 0.30 HZ
GB 0
PC 1.00
    
```

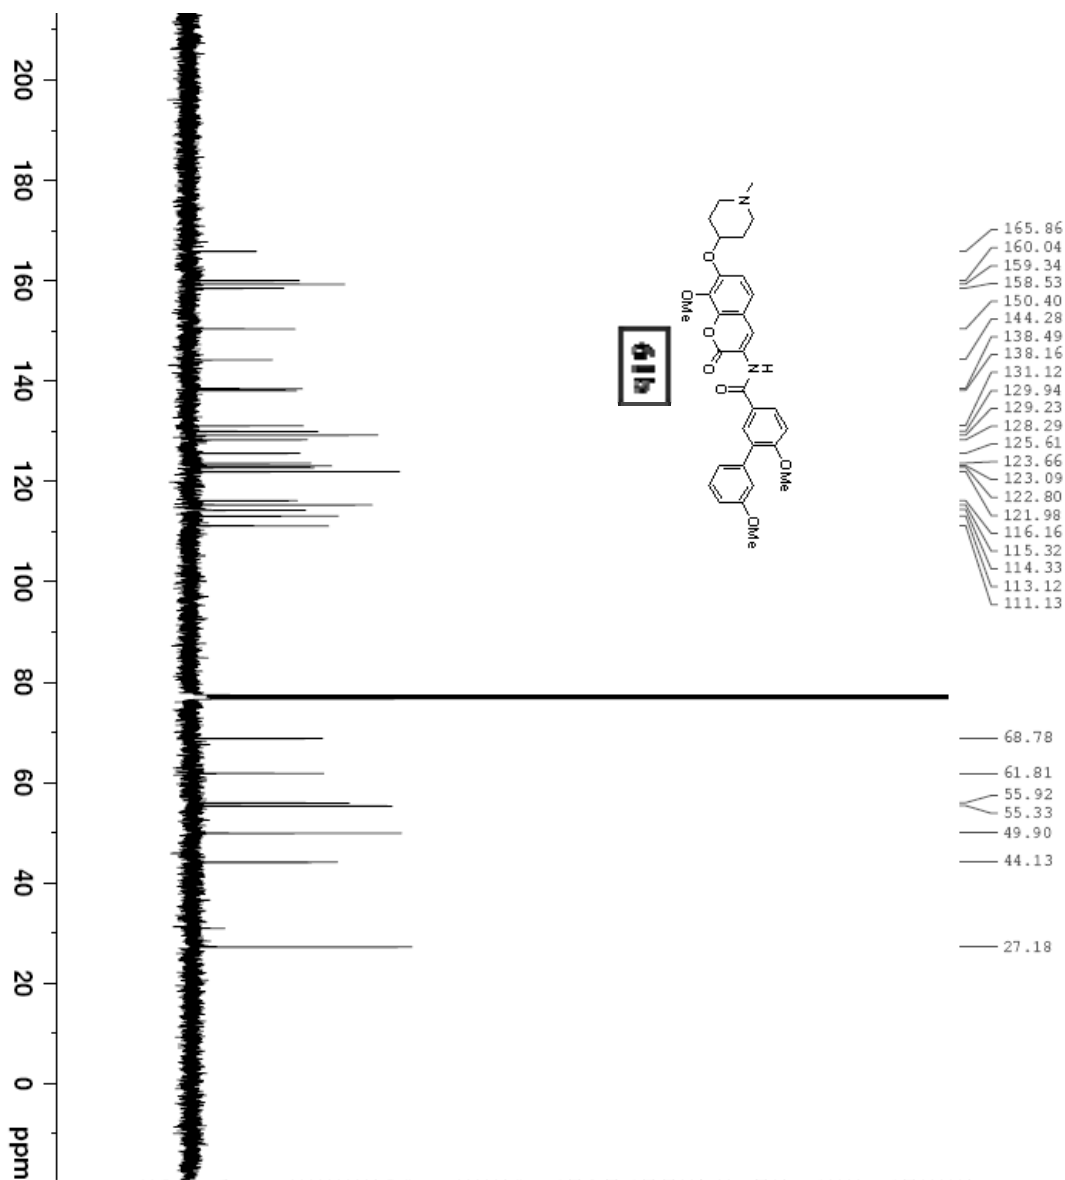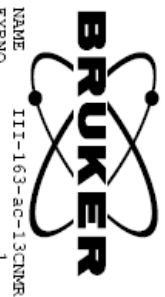

```

NAME III-163-ac-13CNMR
EXE NO 1
PROCNO 20090101
Date_ 17.37
Time dxr400
INSTRUM 5 mm QNP 1H/13
PROBHD zgpg30
PULPROG zgpg30
TD 65536
SOLVENT CDCl3
NS 492
DS 4
SWH 23980.814 HZ
FIDRES 0.365918 HZ
AQ 1.3664756 sec
RG 32768
DW 20.850 usec
DE 6.00 usec
TE 295.7 K
D1 2.00000000 sec
d11 0.03000000 sec
DELTA 1.899999998 sec
TDO 2
    
```

```

===== CHANNEL f1 =====
NUC1 13C
P1 9.85 usec
PI1 -2.00 dB
SFO1 100.6228298 MHZ
    
```

```

===== CHANNEL f2 =====
CPDPRG2 waltz16
NUC2 1H
PCPD2 100.00 usec
PI2 -5.00 dB
PI12 14.58 dB
PI13 16.00 dB
SFO2 400.1316005 MHZ
SI 32768
SF 100.6127690 MHZ
NDW EM
SBB 0
WB 1.00 HZ
GB 0
PC 1.40
    
```



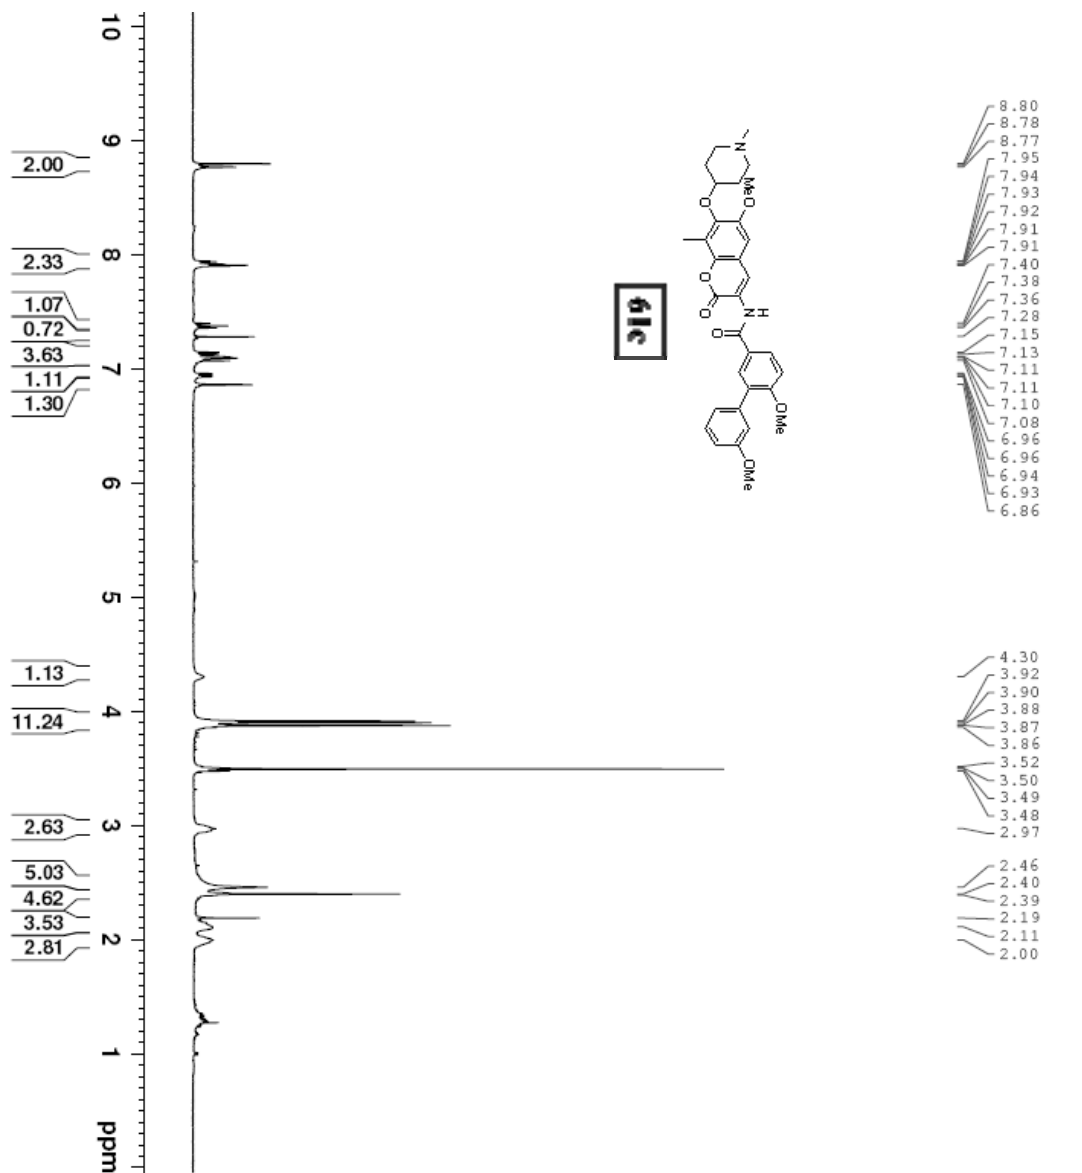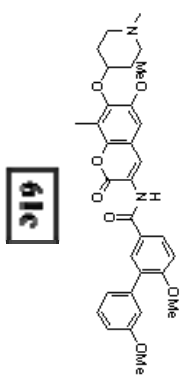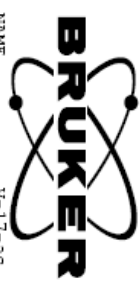

```

NAME          V-17-fac
EXPNO         1
PROCNO        1
Date_         20090208
Time          12.45
INSTRUM       dx400
PROBHD        5 mm QNP 1H/13
PULPROG       zg30
TD            65536
SOLVENT       CDCl3
NS            16
DS            2
SWH           9278.146 Hz
FIDRES       0.126314 Hz
AQ           3.9584243 sec
RG            4
DM            60.400 usec
DE            6.00 usec
TE           294.3 K
D1           1.00000000 sec
TD0           1

===== CHANNEL f1 =====
NUC1          1H
P1           10.50 usec
PL1          -5.00 dB
SFO1         400.1324710 MHz
SI           32768
SF           400.1300000 MHz
WDW          EM
SSB          0
LB           0.30 Hz
GB           0
PC           1.00
    
```

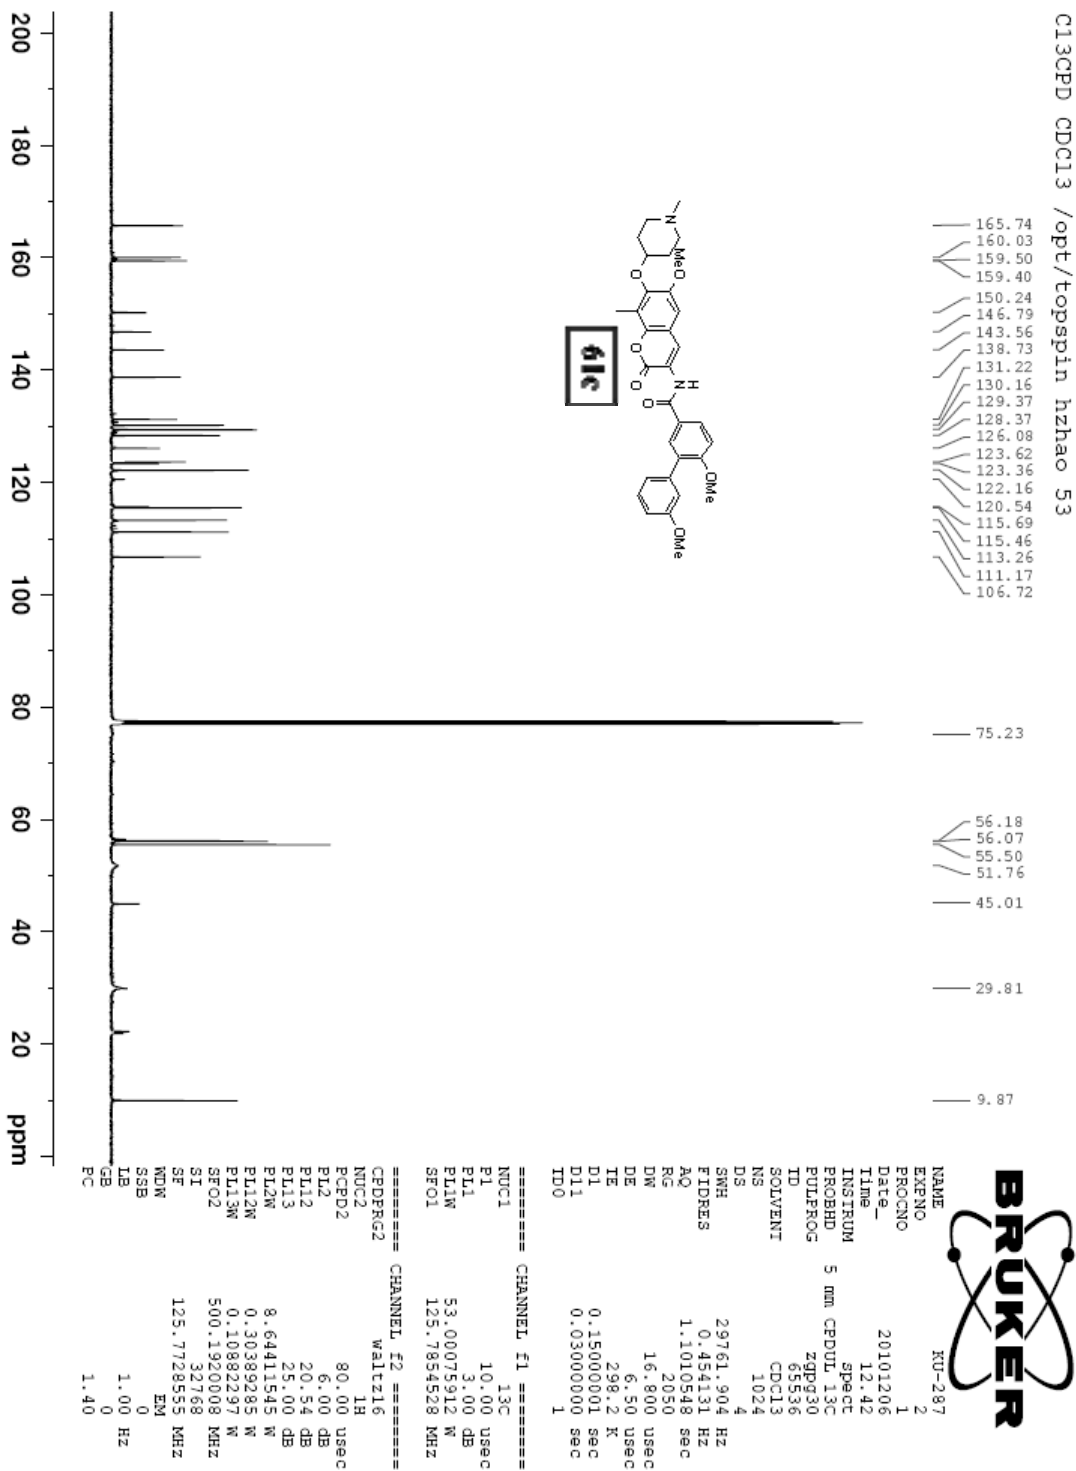

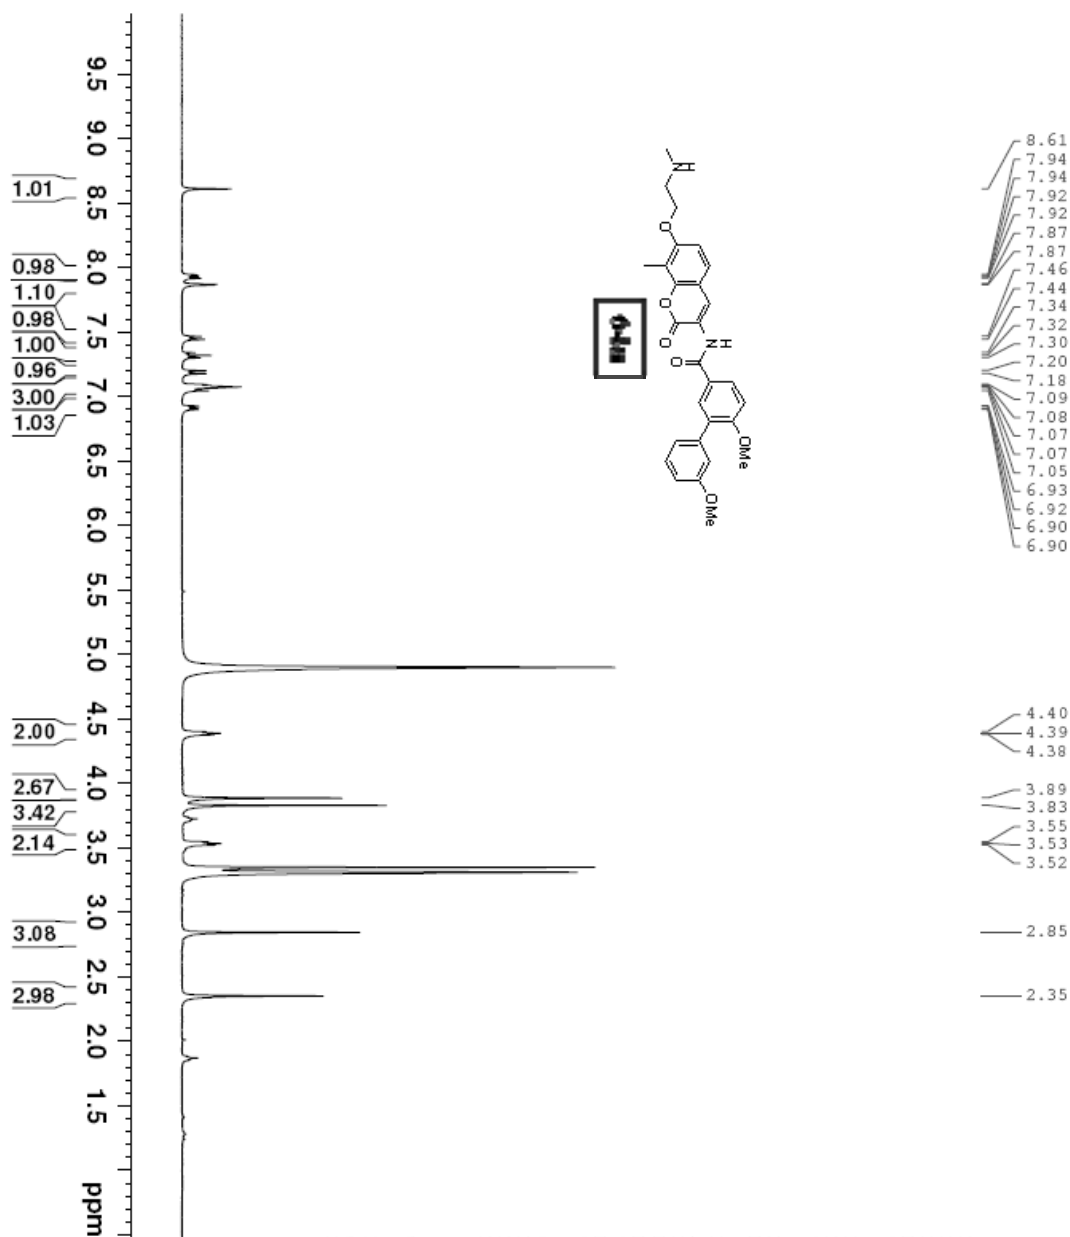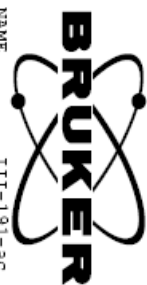

```

NAME III-191-ac
EXNO 1
PROCNO 1
Date_ 20090111
Time 11.06
INSTRUM dxs400
PROBHD 5 mm QNP 1H/13
PULPROG zg30
TD 65536
SOLVENT MeOD
NS 16
DS 2
SWH 8278.146 HZ
FIDRES 0.126314 HZ
AQ 3.9384243 sec
RG 645.1
DE 60.400 usec
TE 294.5 K
DI 1.00000000 sec
ID0 1

===== CHANNEL f1 =====
NUC1 1H
P1 10.50 usec
PL1 -5.00 dB
SFO1 400.1324710 MHz
SI 32768
SF 400.1294993 MHz
WDW EM
SSB 0
LB 0.30 HZ
GB 0
PC 1.00
    
```

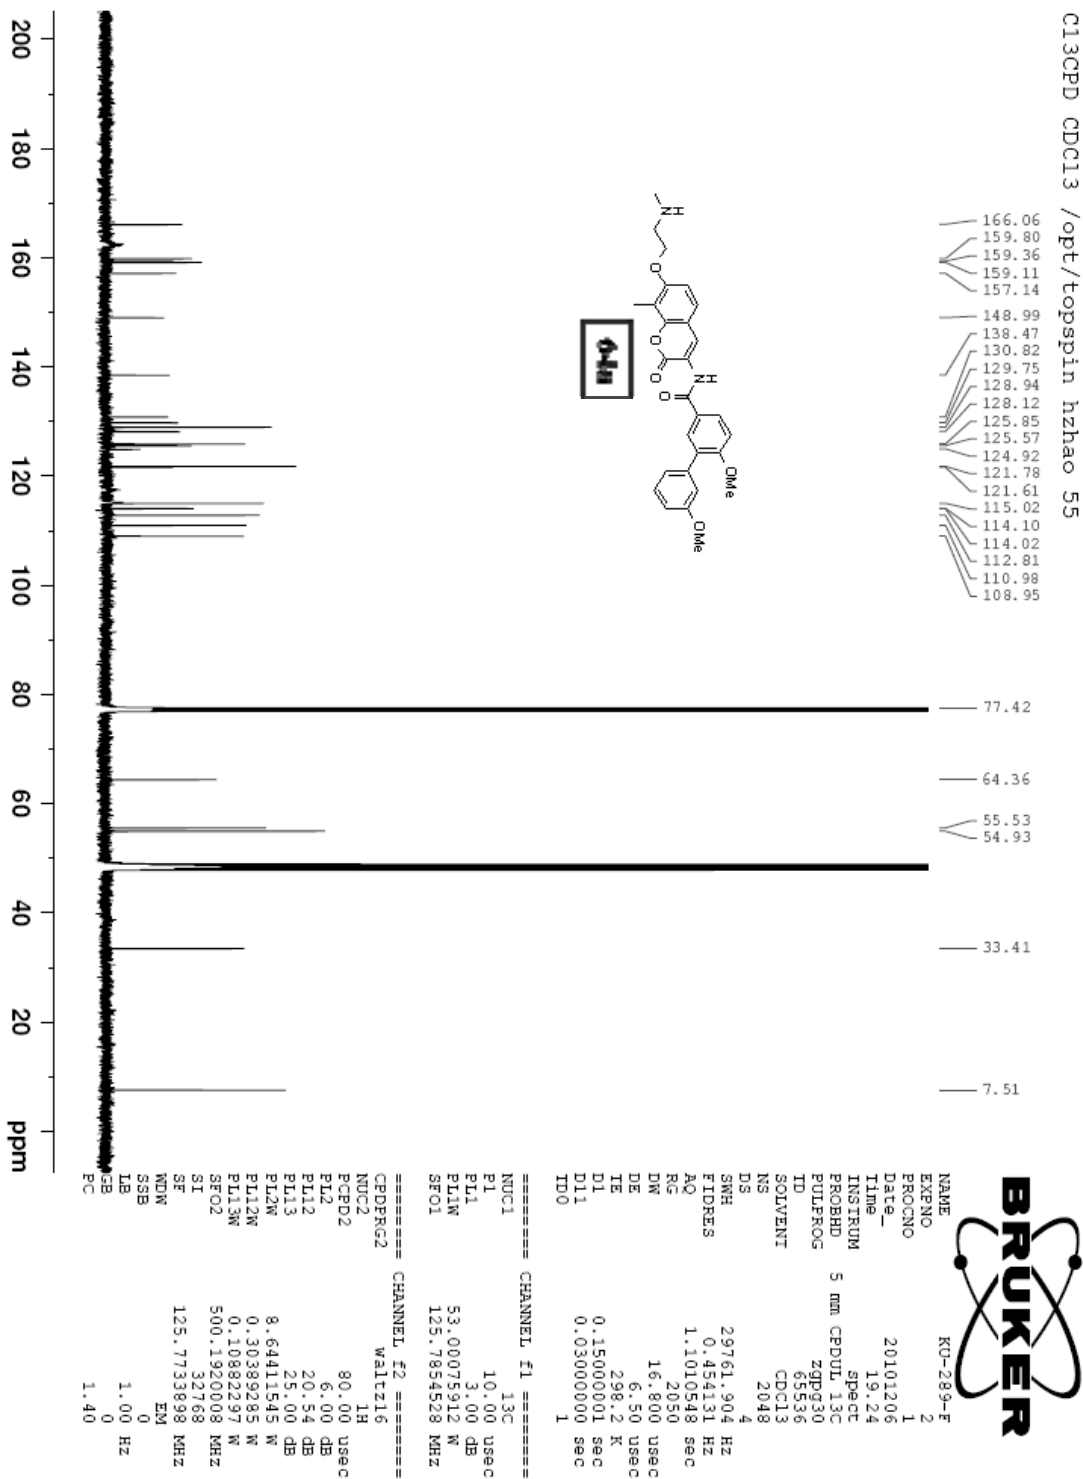

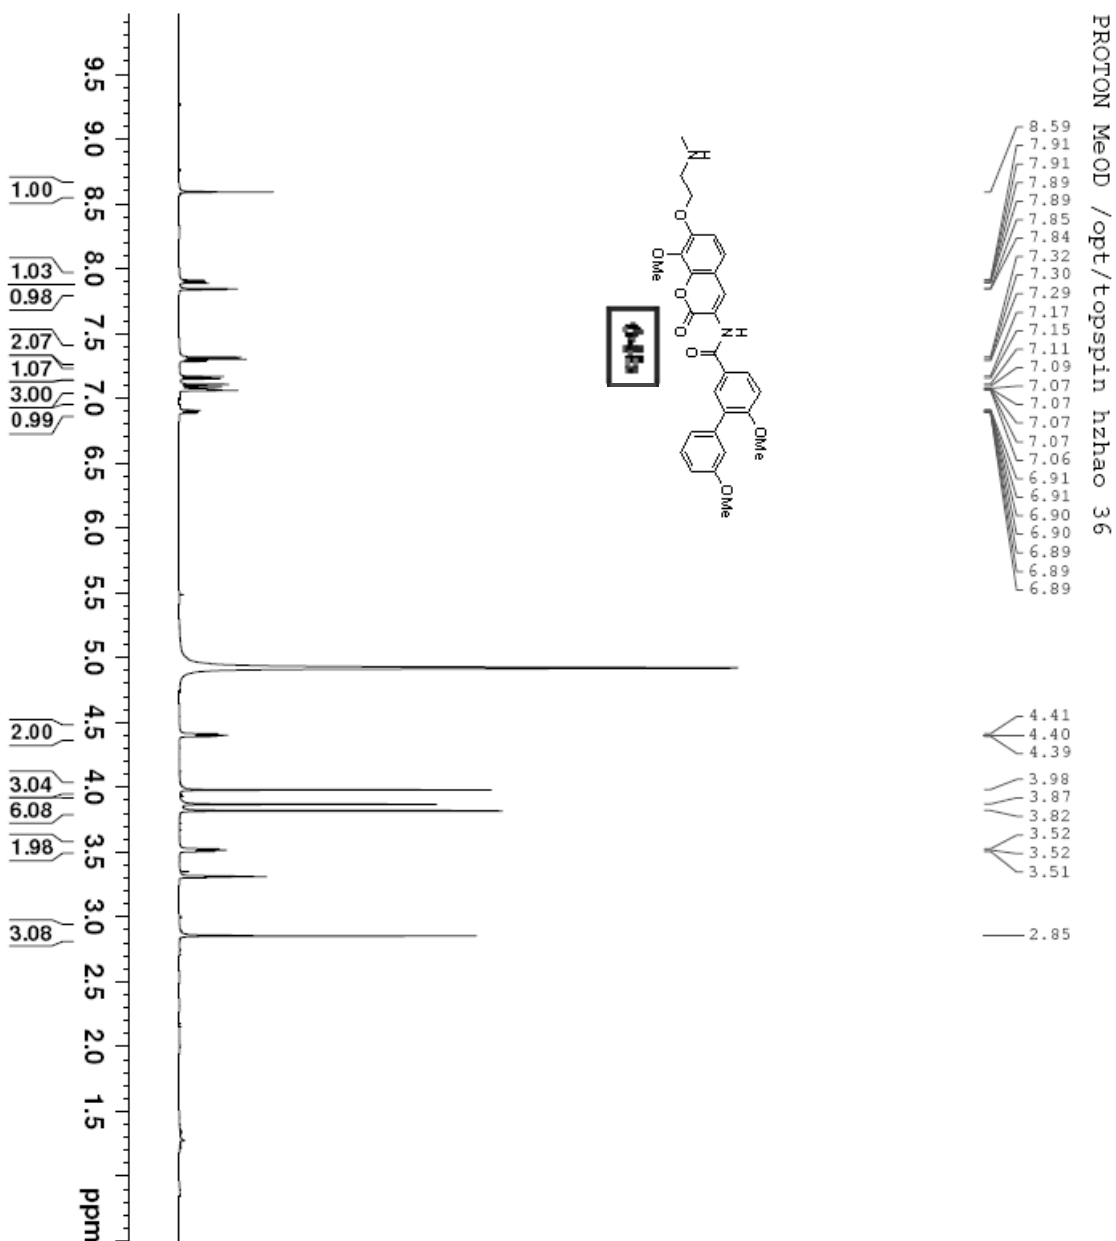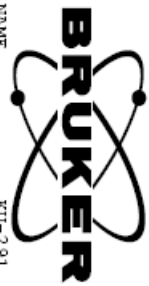

```

NAME          KU-291
EXPNO         1
PROCNO        1
Date_         20090522
Time_         18.06
INSTRUM       5 mm CPDUL
PROBHD        2430
PULPROG       zgpg30
TD            65536
FIDRES        0.157632 Hz
AQ            3.1719923 sec
RG            1290
DW            48.400 usec
DE            6.50 usec
TE            298.2 K
D1            1.00000000 sec
ID0           1

===== CHANNEL f1 =====
NUC1          1H
P1            15.00 usec
PL1           6.00 dB
PL1W          8.64411545 W
SFO1          500.1330889 MHz
SI            32768
SF            500.1330889 MHz
WDW           EM
SSB           0
LB            0.30 Hz
GB            0
PC            1.00
    
```

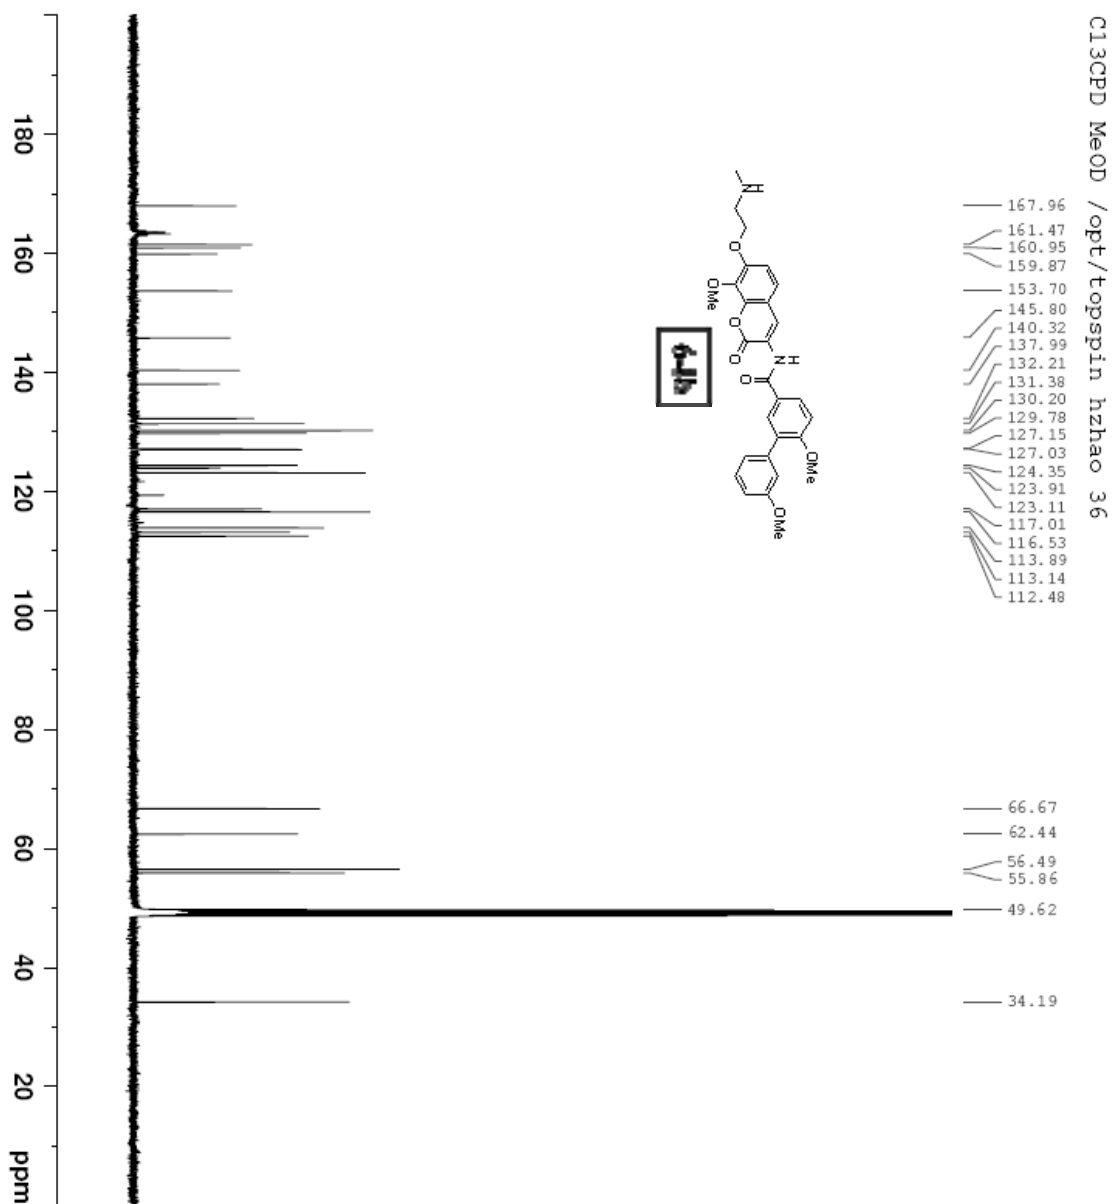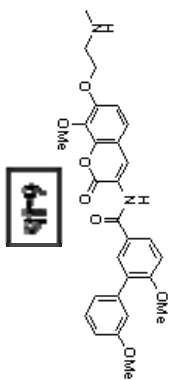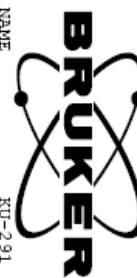

```

NAME          KU-291
EXPNO         2
PROCNO        1
Date_         20090522
Time_         18.29
INSTRUM       spect
PROBHD        5 mm CPDUL 13C
PULPROG       zgpg30
TD            65536
SOLVENT       MeOD
NS            1024
DS            4
SWH           29761.904 Hz
FIDRES        0.454131 Hz
AQ            1.1010548 sec
RG            2050
DW            16.800 usec
DE            6.50 usec
TE            298.2 K
D1            0.15000001 sec
D11           0.030000000 sec
TD0           1

===== CHANNEL f1 =====
NUC1          13C
P1            10.00 usec
PL1           3.00 dB
PL1W          53.00075912 W
SFO1          125.7854528 MHz

===== CHANNEL f2 =====
CPDPRG2      waltz16
NUC2          1H
PCPD2        80.00 usec
PL2           6.00 dB
PL12         20.54 dB
PL13         23.00 dB
PL1W         8.64411545 W
PL2W         0.30389285 W
PL12W        0.10882297 W
PL13W        0.10882297 W
SFO2          500.1920008 MHz
SI            32768
SE           125.7726814 MHz
WDW           EM
SSB           0
GB            0
PC            1.40
    
```

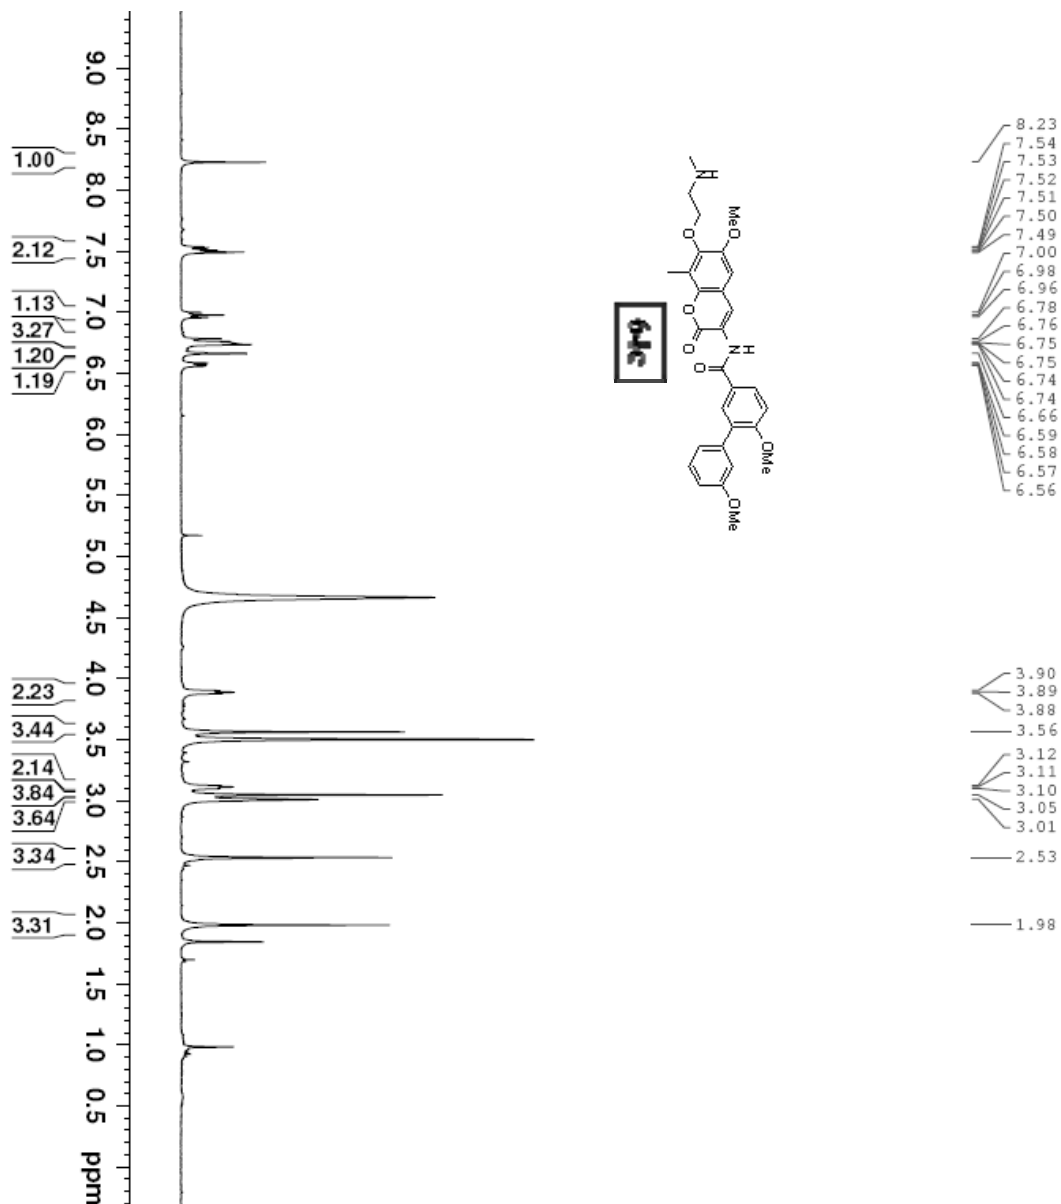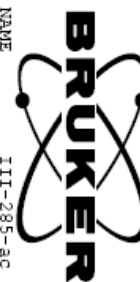

```

NAME III-285-ac
EXPNO 1
PROCNO 1
Date_ 20090202
Time 0.03
INSTRUM drx400
PROBHD 5 mm QNP 1H/13
PULPROG zgpg30
TD 65536
SOLVENT CDCl3
NS 16
DS 2
SWH 8278.146 HZ
FIDRES 0.126314 HZ
AQ 3.9584243 sec
RG 4
DE 60.400 usec
TE 294.2 K
D1 1.00000000 sec
ID0 1

===== CHANNEL f1 =====
NUC1 1H
P1 10.50 usec
PL1 -5.00 dB
SFO1 400.1324710 MHz
SI 32768
SF 400.1317043 MHz
WDW EM
SSB 0
LB 0.30 HZ
GB 0
PC 1.00
    
```

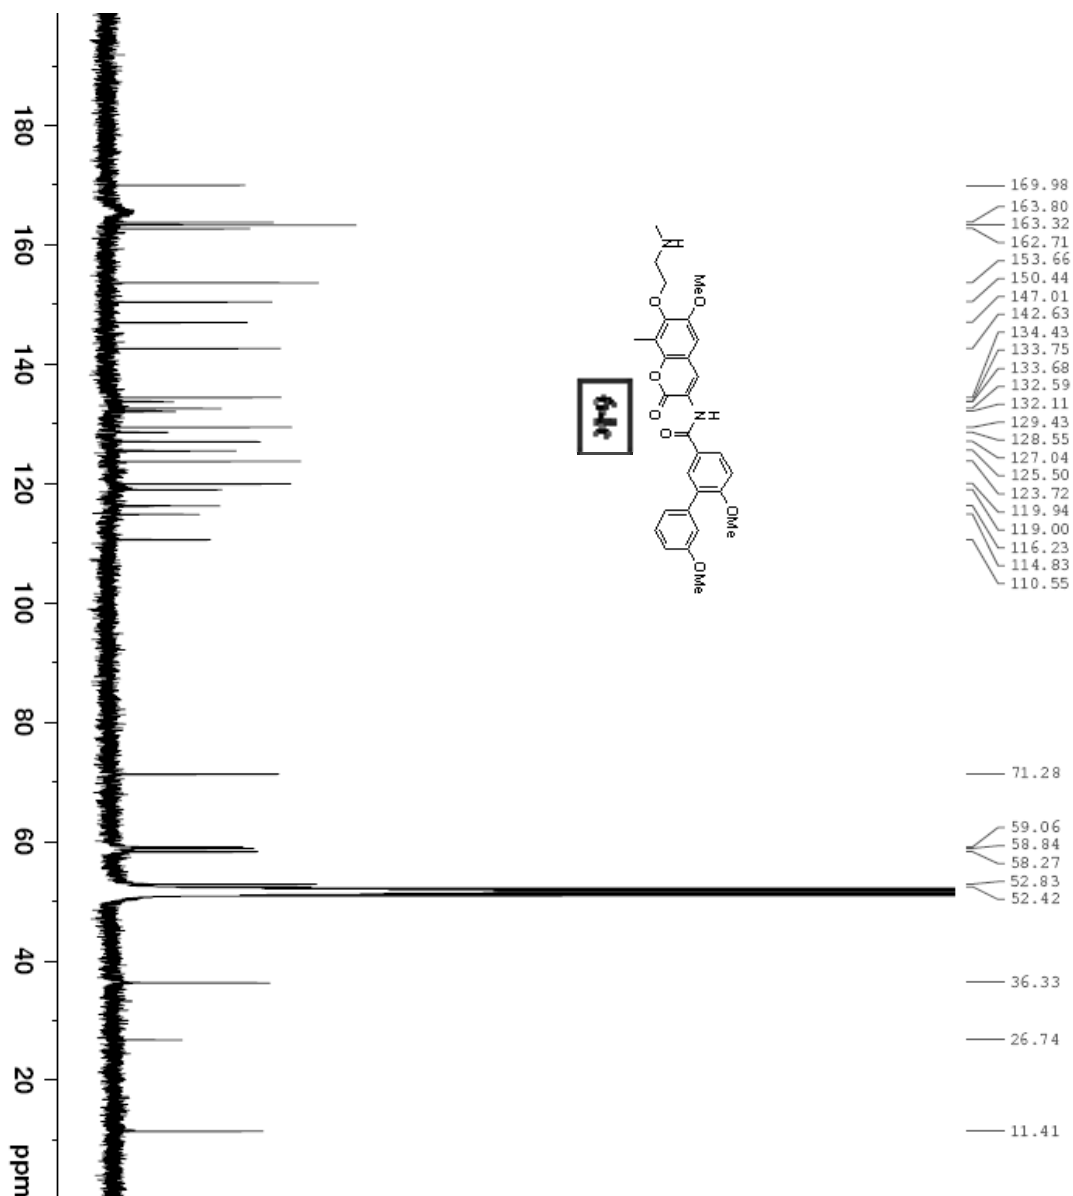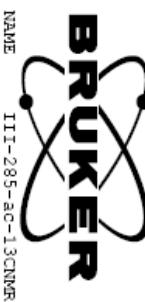

```

NAME III-285-ac-13CNMR
EXNO 1
PROCNO 20090202
Date_
Time 4.03
INSTRUM drx400
PROBHD 5 mm QNP 1H/13
PULPROG zgpg30
TD 65536
SOLVENT CDCl3
NS 7840
DS 4
SWH 23980.814 Hz
FIDRES 0.365918 Hz
AQ 1.3664756 sec
RG 32768
DE 20.850 usec
TE 294.4 K
DL 2.00000000 sec
d11 0.03000000 sec
DELTA 1.89999998 sec
ID0 2
    
```

```

===== CHANNEL f1 =====
NUC1 13C
P1 9.45 usec
PL1 -2.00 dB
SFO1 100.6228298 MHz
    
```

```

===== CHANNEL f2 =====
CPDPRG2 waltz16
NUC2 1H
PCPD2 100.00 usec
PL2 -5.00 dB
PL12 14.58 dB
PL13 16.00 dB
SFO2 400.1316005 MHz
SI 32768
SE 100.6127690 MHz
WDW EM
SSB 0
LB 1.00 Hz
GB 0
PC 1.40
    
```



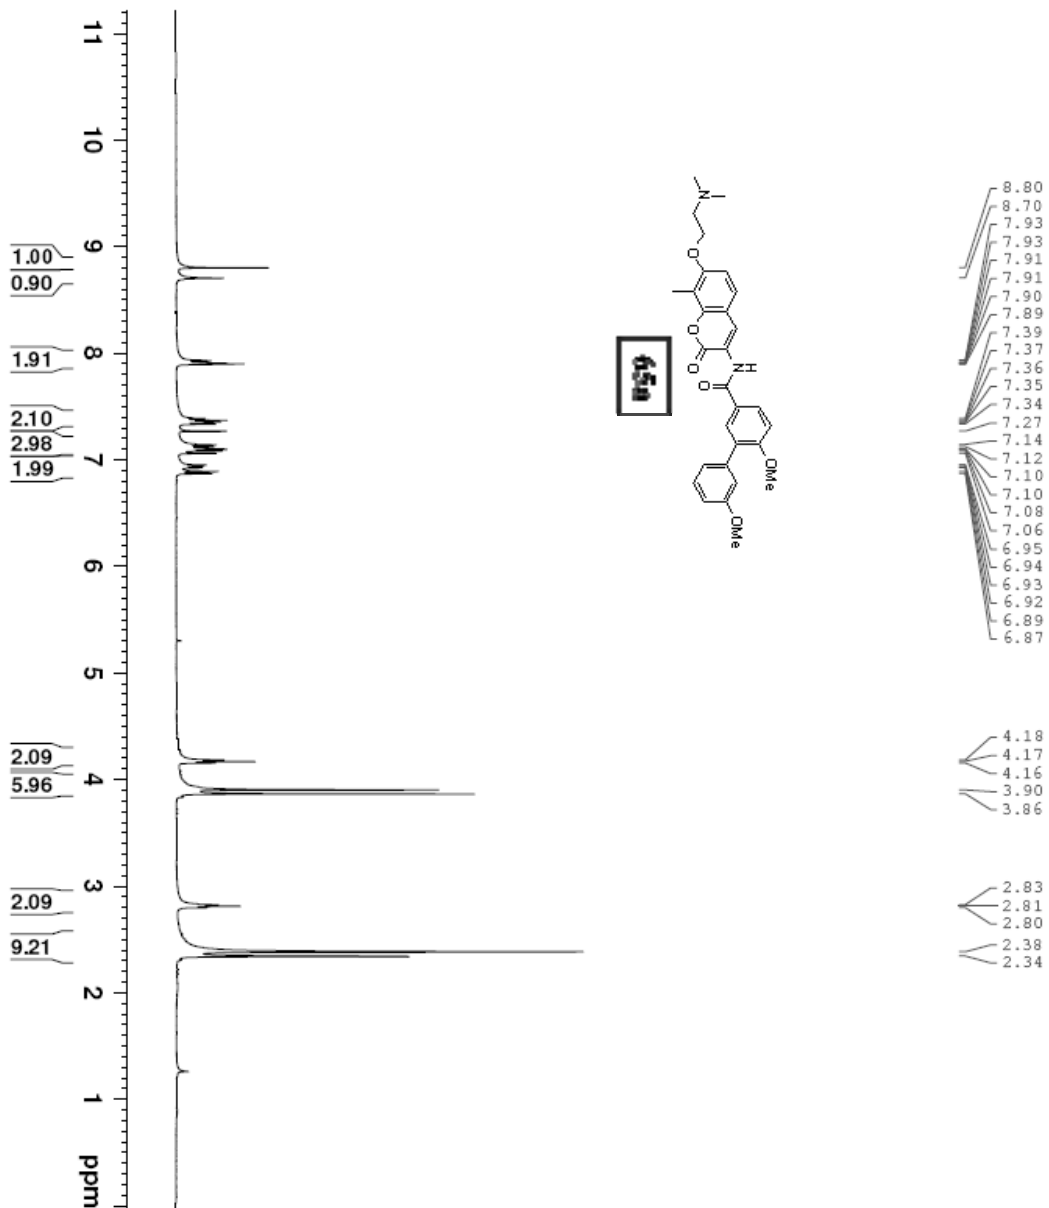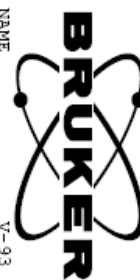

```

NAME V-93
EXPNO 1
PROCNO 1
Date_ 20090319
Time 20.56
INSTRUM dx400
PROBHD 5 mm QNP 1H/13
PULPROG zg30
ID 2930
SOLVENT CDCl3
NS 16
DS 2
SWH 8278.146 Hz
FIDRES 0.126314 Hz
AQ 3.9584243 sec
RG 181
DM 60.400 usec
DE 6.00 usec
TE 293.9 K
D1 1.00000000 sec
ID0 1
    
```

```

===== CHANNEL f1 =====
NUC1 1H
P1 10.50 usec
PL1 -5.00 dB
SFO1 400.1324710 MHz
SI 32768
SF 400.1300061 MHz
WDW EM
SSB 0
LB 0.30 Hz
GB 0
PC 1.00
    
```

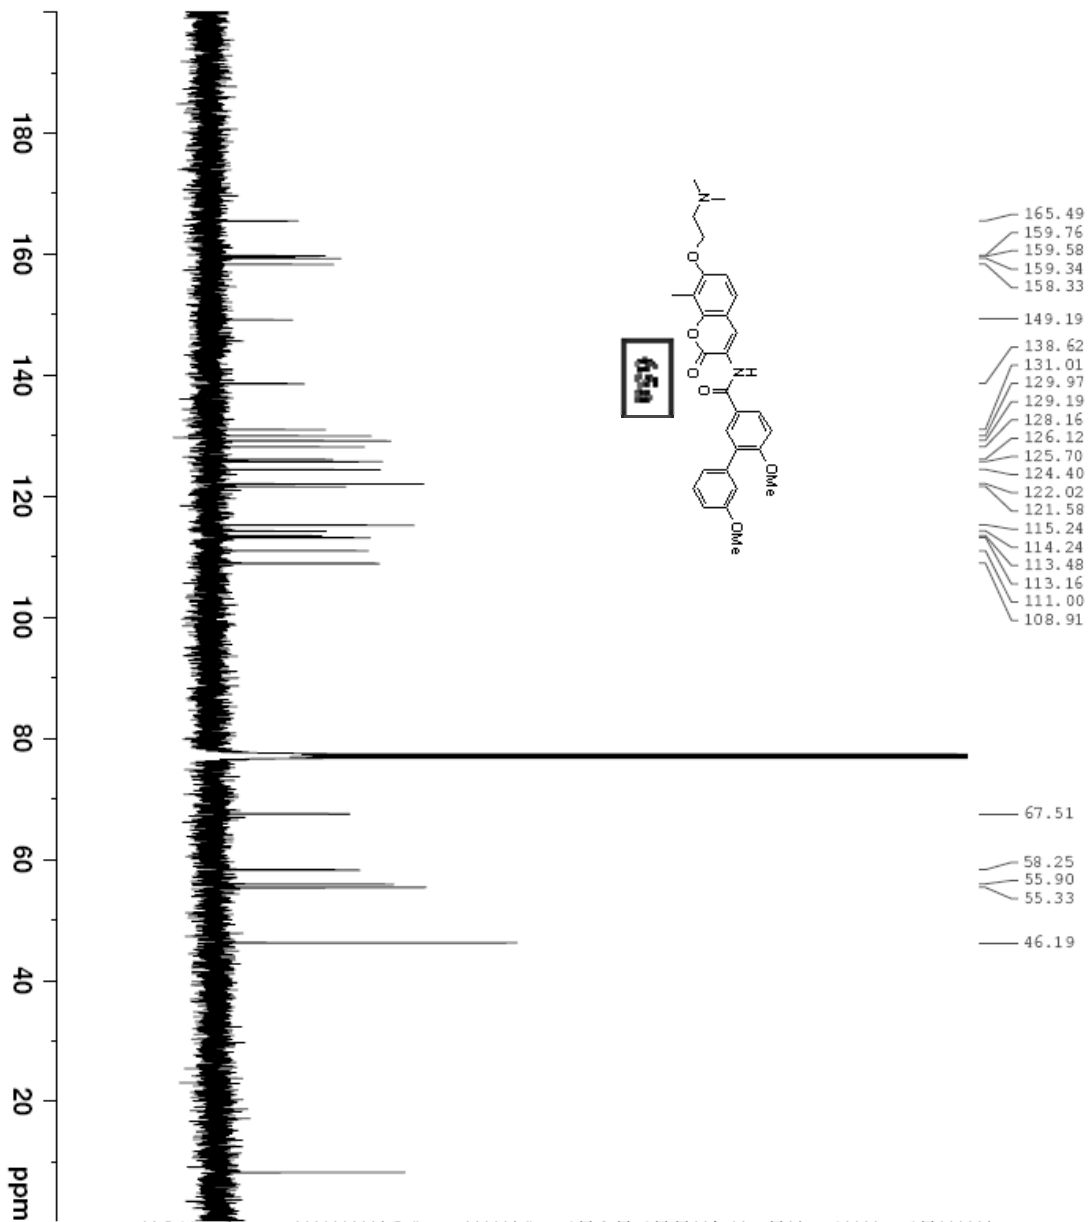

- 165.49
- 159.76
- 159.58
- 159.34
- 158.33
- 149.19
- 138.62
- 131.01
- 129.97
- 129.19
- 128.16
- 126.12
- 125.70
- 124.40
- 122.02
- 121.58
- 115.24
- 114.24
- 113.48
- 113.16
- 111.00
- 108.91

- 76.51
- 58.25
- 55.90
- 55.33
- 46.19

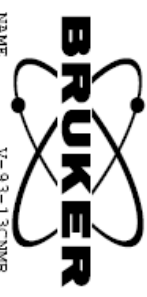

```

NAME          V-93-13CNMR
EXPNO         1
PROCNO        1
Date_         20090319
Time_         22.24
INSTRUM       5 mm QNP 1H/13
PROBHD        dx400
PULPROG       zgpg30
TD             65536
FIDRES        0.365918 Hz
AQ             1.3664756 sec
RG             32768
DW             20.850 usec
DE             6.00 usec
TE             294.0 K
D1             2.00000000 sec
d11            0.03000000 sec
DELTA         1.899999998 sec
ID0            2

===== CHANNEL f1 =====
NUC1           13C
P1             9.85 usec
PL1            -2.00 dB
SFO1          100.6228298 MHz

===== CHANNEL f2 =====
CPDPRG2       waltz16
NUC2           1H
PCPD2         100.00 usec
PL2            -5.00 dB
PL12          14.58 dB
PL13          16.00 dB
SFO2          400.1316005 MHz
SI             32768
SF            100.6127690 MHz
WDW            EM
SSB            0
LB             1.00 Hz
GB             0
PC             1.40
    
```

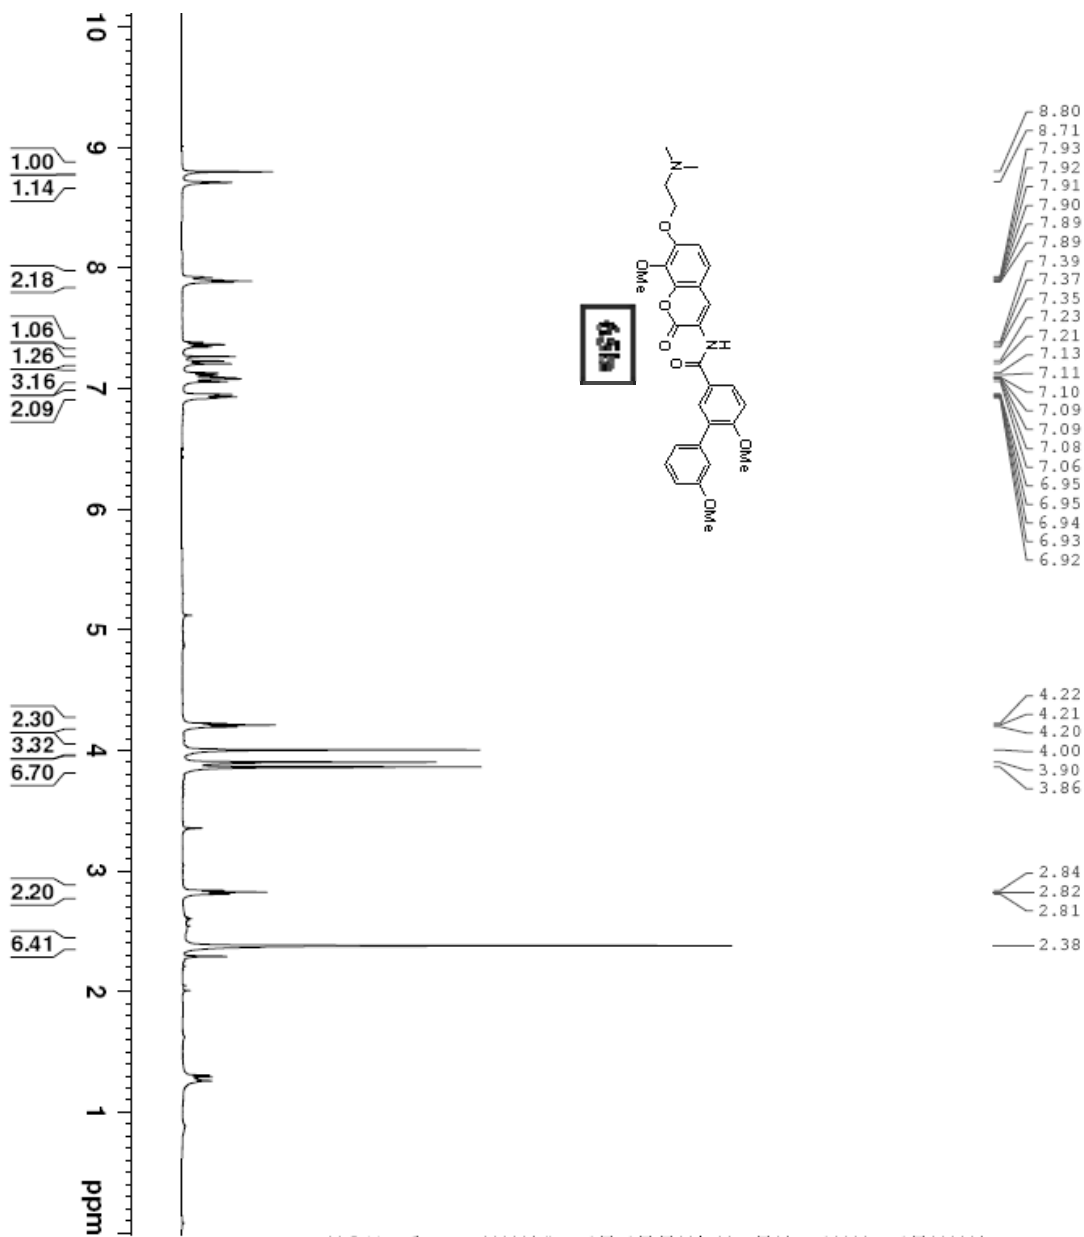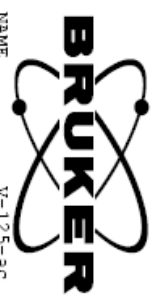

```

NAME V-125-ac
EXPNO 1
PROCNO 1
Date_ 20090310
Time 19.07
INSTRUM dxs400
PROBHD 5 mm QNP 1H/13
PULPROG zg30
TD 65536
SOLVENT CDCl3
NS 16
DS 2
SWH 8278.146 HZ
FIDRES 0.126314 HZ
AQ 3.9584243 sec
RG 362
DM 60.400 usec
DE 6.00 usec
TE 295.2 K
D1 1.000000000 sec
ID0 1

===== CHANNEL f1 =====
NUC1 1H
P1 10.50 usec
PL1 -5.00 dB
SFO1 400.1324710 KHZ
SI 32768
SF 400.1300067 KHZ
WDW EM
SSB 0
LB 0.30 HZ
GB 0
PC 1.00
    
```

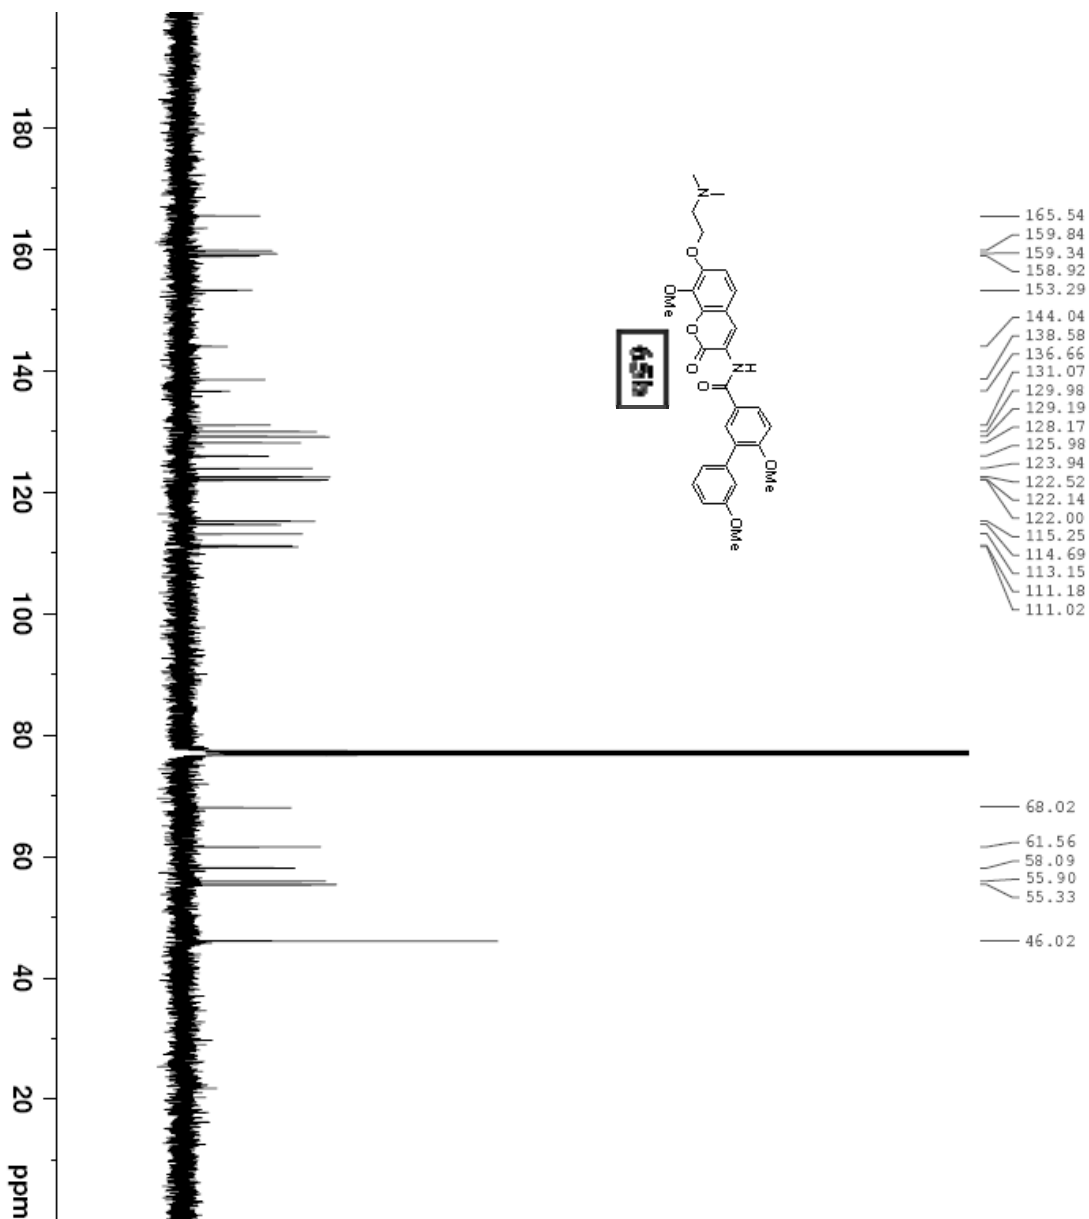

**BRUKER**

V-125-ac-13CNMR

```

NAME V-125-ac-13CNMR
EXPNO 1
PROCNO 1
Date_ 20090310
Time 19.17
INSTRUM dx400
PROBHD 5 mm QNP 1H/13
PULPROG zgpg30
TD 65536
SOLVENT CDCl3
NS 257
DS 4
SMH 23980.814 Hz
FIDRES 0.365918 Hz
AQ 1.3664756 sec
RG 32768
DW 20.850 usec
DE 6.00 usec
TE 295.3 K
D1 2.00000000 sec
d11 0.03000000 sec
DELTA 1.89999998 sec
TD0 2
    
```

```

===== CHANNEL f1 =====
NUC1 13C
P1 9.85 usec
PL1 -2.00 dB
SFO1 100.6228298 MHz

===== CHANNEL f2 =====
CPDPRG2 waltz16
NUC2 1H
PCPD2 100.00 usec
PL2 -5.00 dB
PL12 14.58 dB
PL13 16.00 dB
SFO2 400.1316005 MHz
SI 32768
SF 100.6127690 MHz
NDW EM
SSB 0
LB 1.00 Hz
GB 0
PC 1.40
    
```

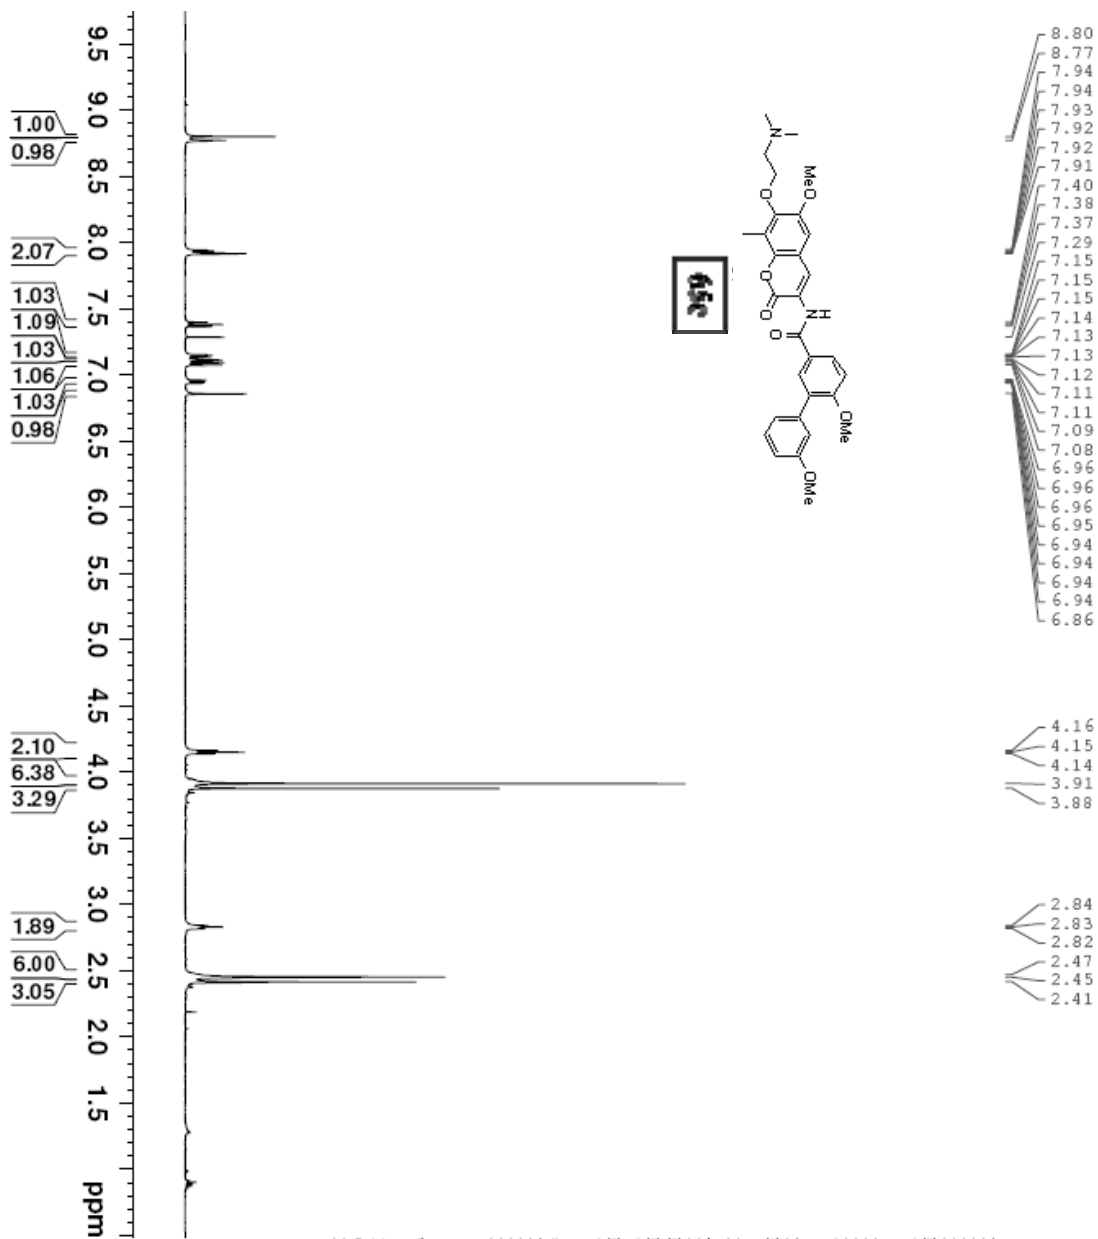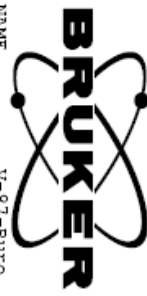

```

NAME V-87-Pure
EXPNO 1
PROCNO 1
Date_ 20090313
Time 20.18
INSTRUM spect
PROBHD 5 mm BBO BB-1H
PULPROG zgpg30
TD 65536
F2 2930
SOLVENT CDCl3
NS 16
DS 2
SWH 10330.578 Hz
FIDRES 0.157632 Hz
AQ 3.1720407 sec
RG 4
DW 48.400 usec
DE 6.00 usec
TE 297.2 K
D1 1.00000000 sec
TD0 1

===== CHANNEL f1 =====
NUC1 1H
P1 8.60 usec
PL1 -5.00 dB
SFO1 500.1300885 MHz
SI 32768
SF 500.1300000 MHz
WDW EM
SSB 0
LB 0.30 Hz
GB 0
PC 1.00
    
```

8.80  
8.77  
7.94  
7.94  
7.93  
7.92  
7.92  
7.91  
7.40  
7.38  
7.37  
7.29  
7.15  
7.15  
7.15  
7.14  
7.13  
7.13  
7.12  
7.11  
7.11  
7.09  
7.08  
6.96  
6.96  
6.95  
6.94  
6.94  
6.94  
6.94  
6.86

4.16  
4.15  
4.14  
3.91  
3.88

2.84  
2.83  
2.82  
2.47  
2.45  
2.41

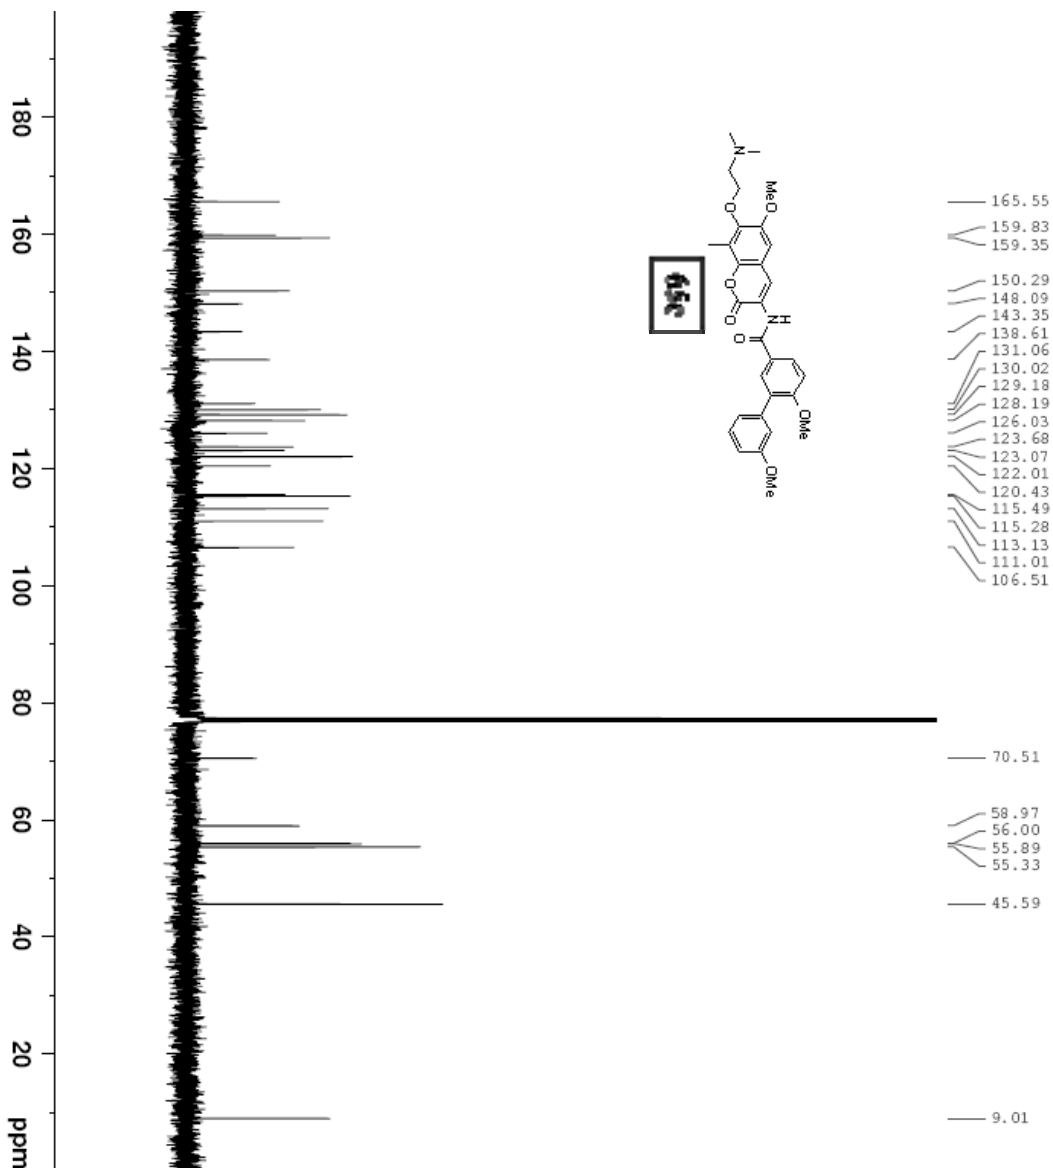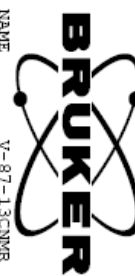

```

NAME V-87-13CNMR
EXPNO 1
PROCNO 1
Date_ 20090312
Time 11.10
INSTRUM spect
PROBHD 5 mm BBO BB-1H
PULPROG zgpg30
ID 65536
SOLVENT CDCl3
NS 258
DS 4
SWH 30030.029 HZ
FIDRES 0.488222 HZ
AQ 1.0912410 sec
RG 32768
DW 16.650 usec
DE 6.00 usec
TE 297.2 K
D1 0.1500001 sec
d11 0.0300000 sec
DELTA 0.0500000 sec
TD 4

===== CHANNEL f1 =====
NUC1 13C
P1 8.90 usec
PL1 -1.15 dB
SFO1 125.7703643 KHZ

===== CHANNEL f2 =====
CPDPRG2 waltz16
NUC2 1H
PCPD2 95.00 usec
PL2 -5.00 dB
PL12 15.86 dB
PL13 30.00 dB
SFO2 500.1320005 KHZ
SI 32768
SF 125.7577890 KHZ
WDW EM
SSB 0
LB 1.00 HZ
GB 0
PC 1.40
    
```

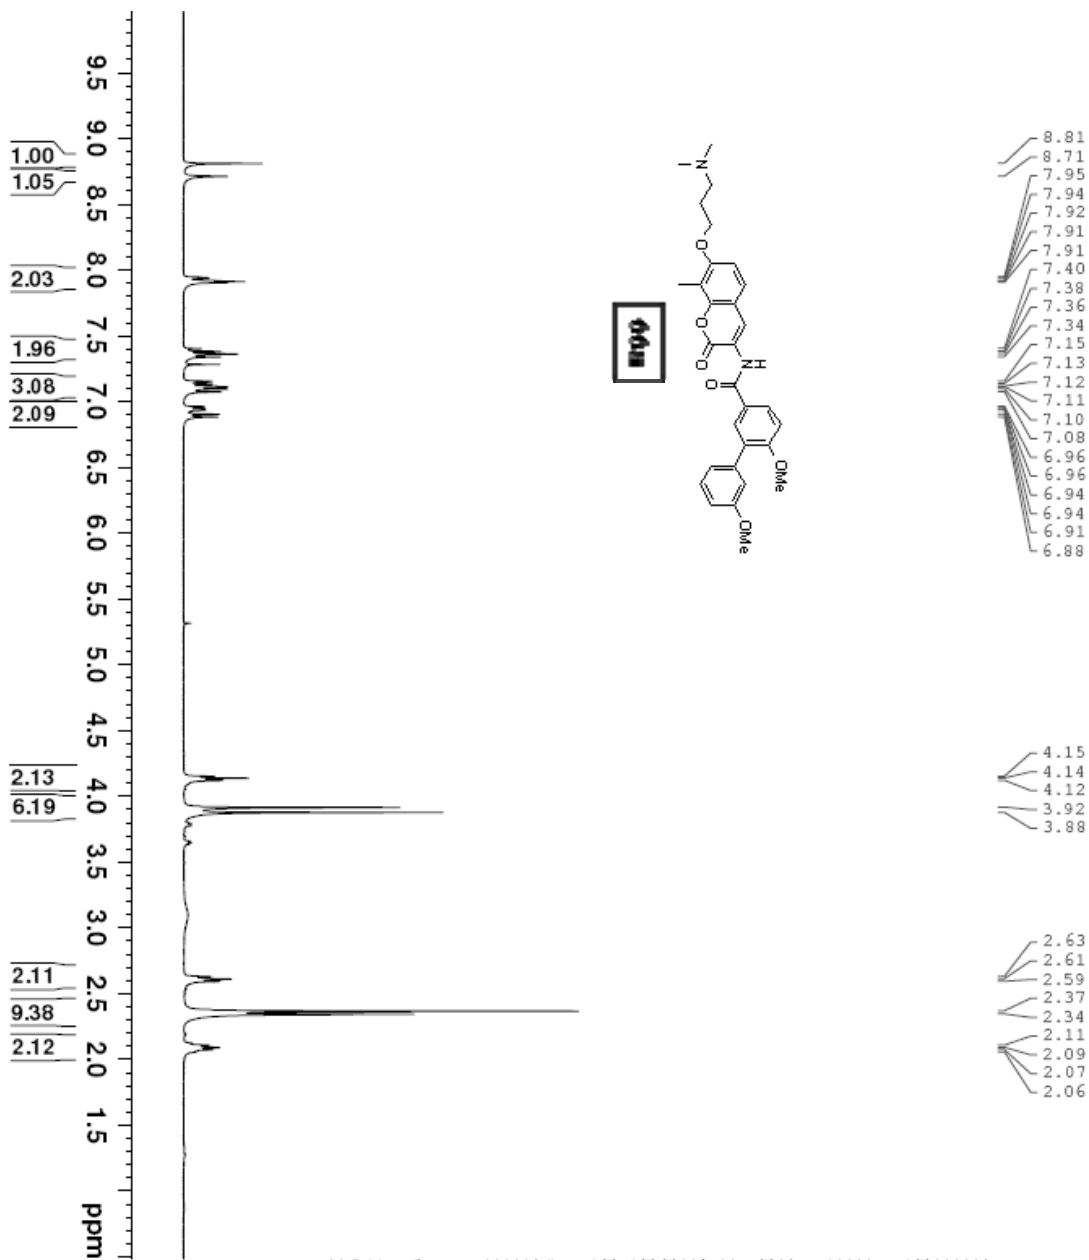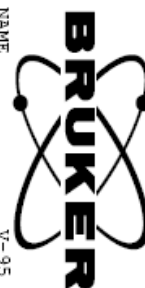

```

NAME          V-95
EXPNO         1
PROCNO        1
Date_         20090225
Time          22.00
INSTRUM       dx400
PROBHD        5 mm QNP 1H/13
PULPROG       zg30
ID            65536
SOLVENT       CDCl3
NS            16
DS            2
SWH           8278.146 Hz
FIDRES        0.126314 Hz
AQ            3.9584243 sec
RG            4
DW            60.400 usec
DE            6.00 usec
TE            294.4 K
D1            1.000000000 sec
TD0           1

===== CHANNEL f1 =====
NUC1          1H
P1            10.50 usec
PL1          -5.00 dB
SFO1         400.1324710 MHz
SI           32768
SF           400.1300000 MHz
WDW          EM
SSB          0
LB           0.30 Hz
GB           0
PC           1.00
    
```

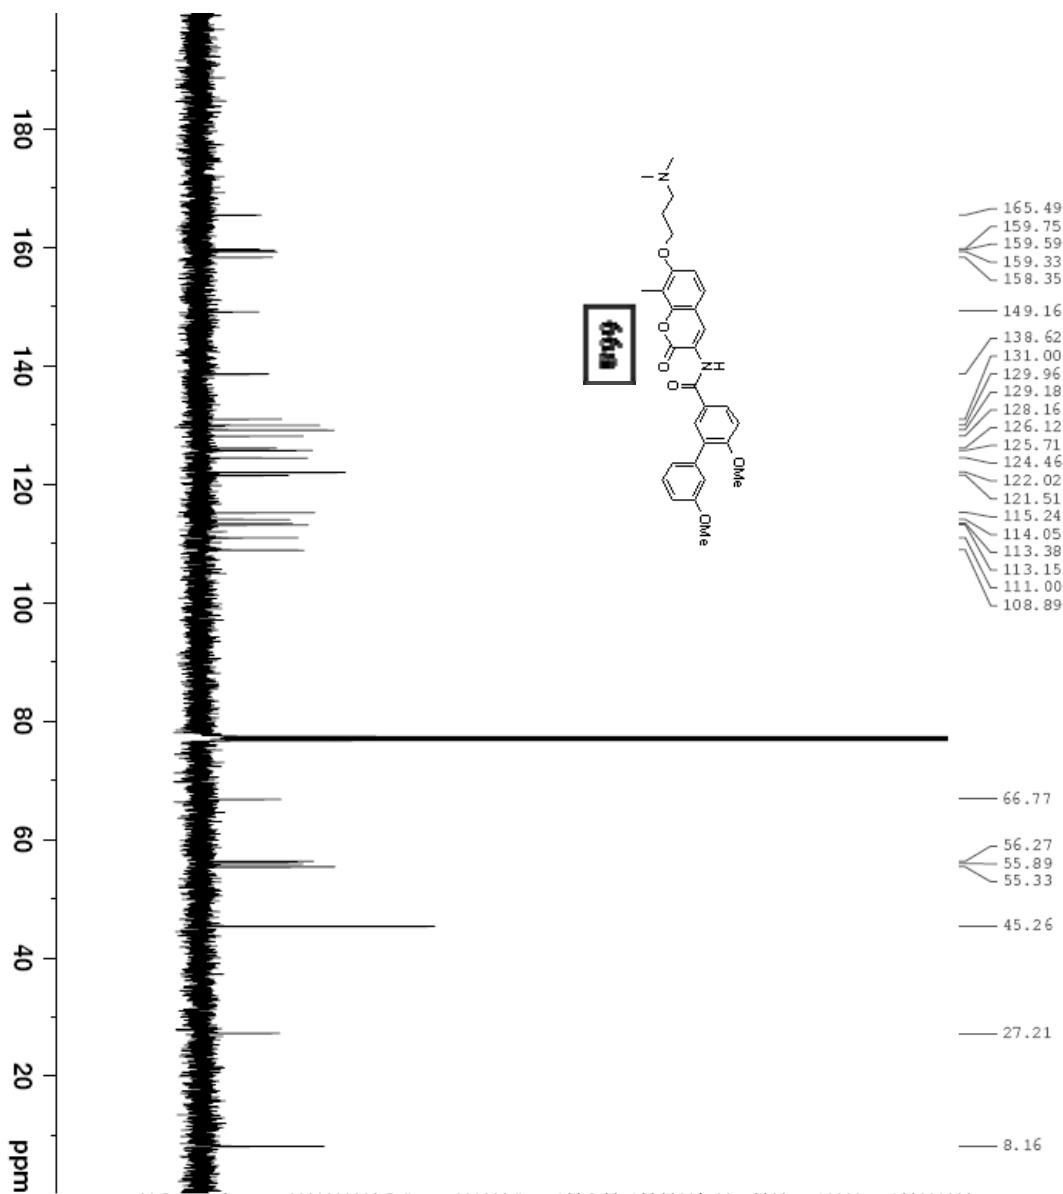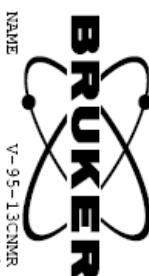

```

NAME V-95-13CNMR
EXPNO 1
PROCNO 1
Date_ 20090225
Time_ 22.05
INSTRUM dtx400
PROBHD 5 mm QNP 1H/13
PULPROG zgpg30
TD 65536
SOLVENT CDCl3
NS 129
DS 4
SWH 23980.814 Hz
FIDRES 0.365918 Hz
AQ 1.3664756 sec
RG 32768
DE 20.850 usec
TE 294.5 K
D1 2.00000000 sec
d11 0.03000000 sec
DELTA 1.89399998 sec
TD0 1
===== CHANNEL f1 =====
NUC1 13C
P1 9.85 usec
PL1 -2.00 dB
SFO1 100.6228298 MHz
===== CHANNEL f2 =====
CEDEFG2 waltz16
NUC2 1H
PCPD2 100.00 usec
PL2 -5.00 dB
PL12 14.58 dB
PL13 16.00 dB
SFO2 400.1316005 MHz
SI 32768
SF 100.6127690 MHz
WDW EM
SSB 0
GB 0
PC 1.40
    
```



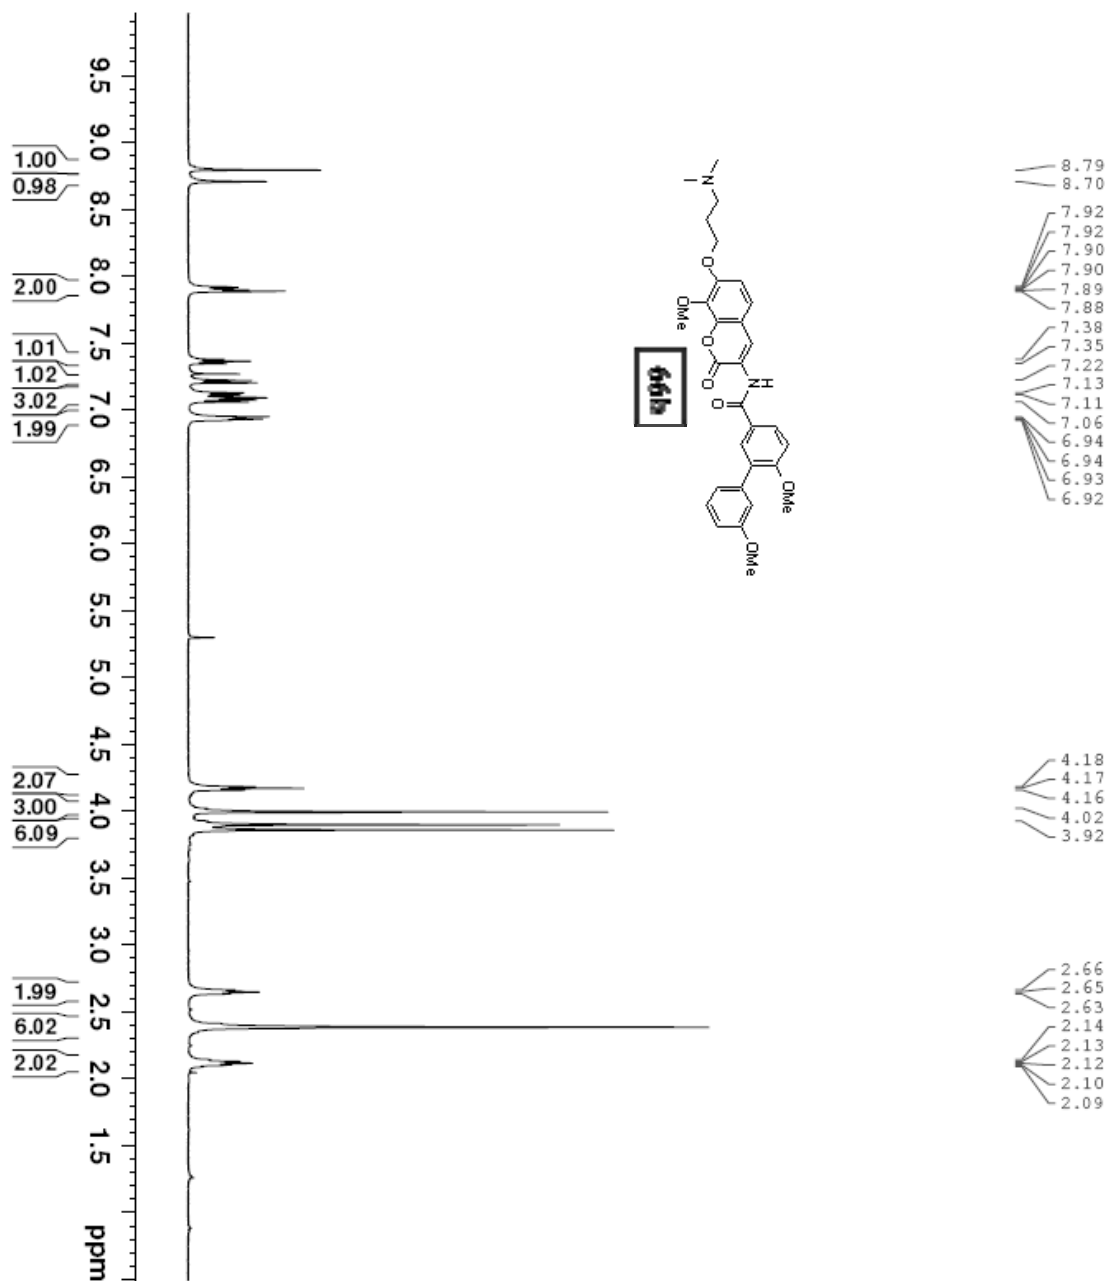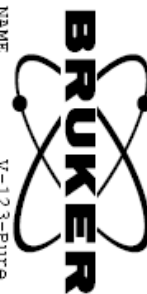

```

NAME V-123-pure
EXPNO 1
PROCNO 1
Date_ 20090313
Time_ 19.28
INSTRUM spect
PROBHD 5 mm BBO BB-1H
PULPROG zgpg30
TD 2430
SOLVENT CDCl3
NS 16
DS 2
SWH 10330.578 Hz
FIDRES 0.157632 Hz
AQ 3.1720407 sec
RG 4
DW 48.400 usec
DE 6.00 usec
TE 297.2 K
D1 1.00000000 sec
TD0 1

===== CHANNEL f1 =====
NUC1 1H
P1 8.60 usec
PL1 -5.00 dB
SFO1 500.1330985 MHz
SI 32768
SF 500.1330080 MHz
WDW EM
SSB 0
LB 0.30 Hz
GB 0
PC 1.00
    
```

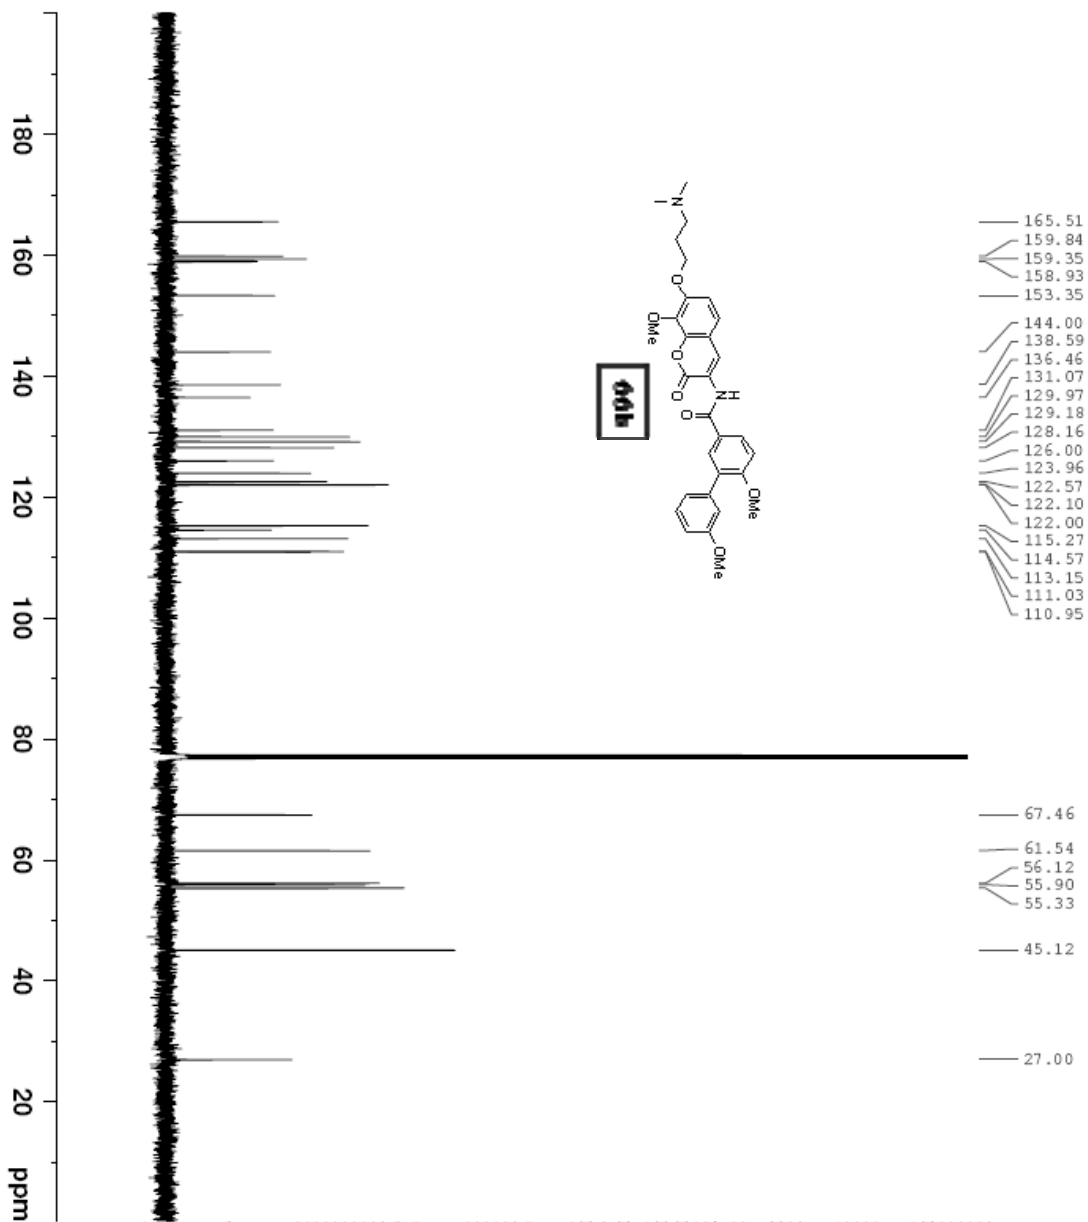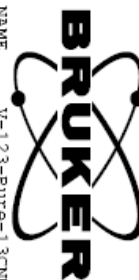

```

NAME V-123-Pure-13CNMR
EXPNO 1
PROCNO 1
Date_ 20090313
Time 19.35
INSTRUM spect
PROBHD 5 mm BBO BB-1H
PULPROG zgpg30
TD 65536
FIDRES 0.03000000 sec
SOLVENT CDCl3
NS 720
DS 4
SWH 30030.029 Hz
FIDRES 0.458222 Hz
AQ 1.0912410 sec
RG 32768
KW 16.650 usec
DE 6.00 usec
TE 297.2 K
D1 0.15000001 sec
d11 0.03000000 sec
DELTA 0.05000000 sec
ID0 4

===== CHANNEL f1 =====
NUC1 13C
P1 8.90 usec
PL1 -1.15 dB
SFO1 125.7703643 MHz

===== CHANNEL f2 =====
CPDPRG2 waltz16
NUC2 1H
PCPD2 95.00 usec
PL2 -5.00 dB
PL12 15.86 dB
PL13 30.00 dB
SFO2 500.1320005 MHz
SI 32768
SE 125.7577890 MHz
WDW EM
SSB 0
LB 1.00 Hz
GB 0
PC 1.40
    
```

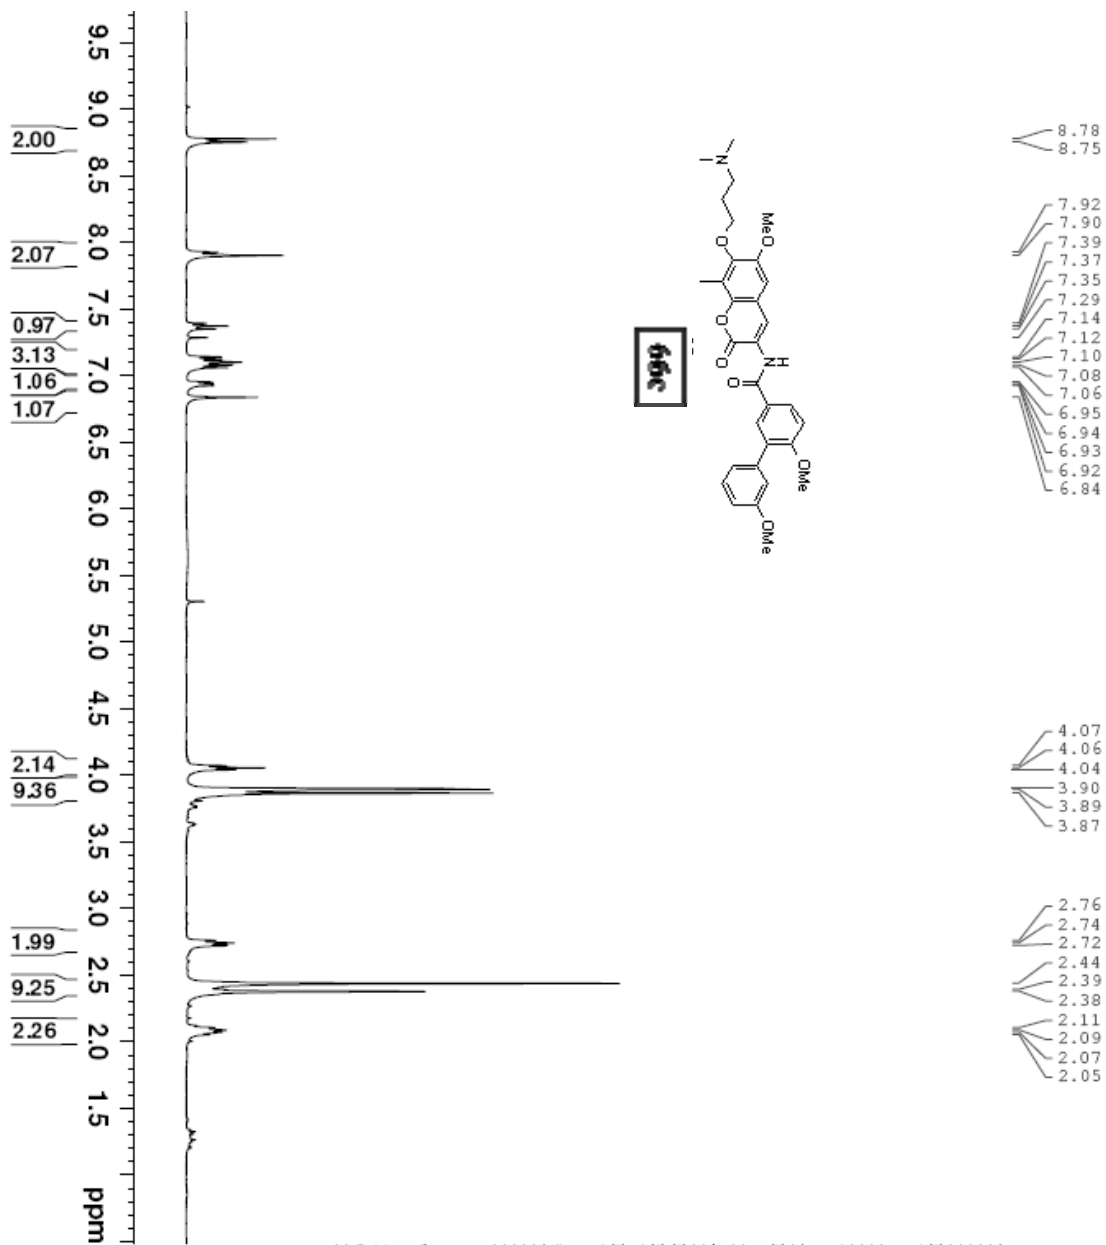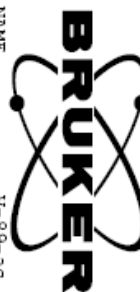

```

NAME          V-89-ac
EXPNO         1
PROCNO        1
Date_         20090224
Time         21.37
INSTRUM       dx400
PROBHD        5 mm QNP 1H/13
PULPROG       zg30
ID            65536
SOLVENT       CDCl3
NS            16
DS            2
SWH           8278.146 Hz
FIDRES        0.126314 Hz
AQ            3.9584243 sec
RG            4
DW            60.400 usec
DE            6.00 usec
TE            294.2 K
D1            1.00000000 sec
ID0           1

===== CHANNEL f1 =====
NUC1          1H
P1            10.50 usec
PL1           -5.00 dB
SFO1          400.1324710 KHz
SI            32768
SF            400.1300000 KHz
WDW           EM
SSB           0
LB            0.30 Hz
GB            0
PC            1.00
    
```

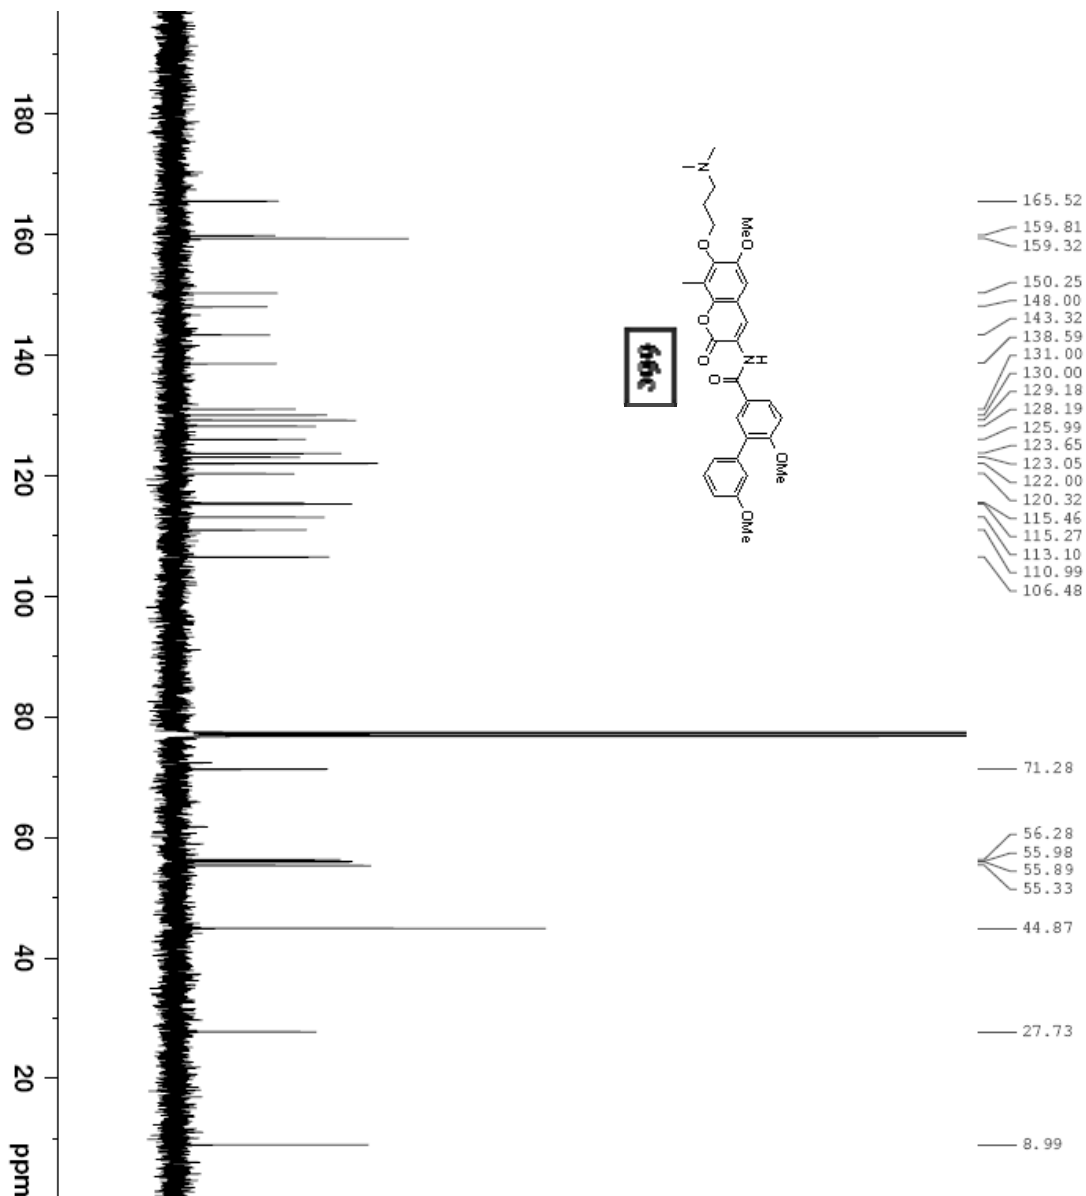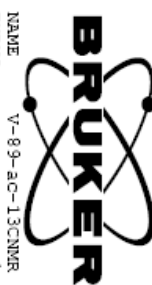

```

NAME V-89-ac-13CNMR
EXPNO 1
PROCNO 1
Date_ 20090224
Time 21.40
INSTRUM drx400
PROBHD 5 mm QNP 1H/13
PULPROG zgpg30
ID 65536
SOLVENT CDCl3
NS 92
DS 4
SWH 23980.814 HZ
FIDRES 0.365918 HZ
AQ 1.3664756 sec
RG 32768
DM 20.850 usec
DE 6.00 usec
TE 294.3 K
D1 2.00000000 sec
d11 0.03000000 sec
DELTA 1.89999998 sec
TD0 2
===== CHANNEL f1 =====
NUC1 13C
P1 9.85 usec
PI1 -2.00 dB
SFO1 100.6228298 MHz
===== CHANNEL f2 =====
CPDPRG2 waltz16
NUC2 1H
PCPD2 100.00 usec
PI2 -5.00 dB
PI12 14.58 dB
PI13 16.00 dB
SFO2 400.1316005 MHz
SI 32768
SF 100.6127690 MHz
WDW EM
SSB 0
LB 1.00 HZ
GB 0
PC 1.40
    
```

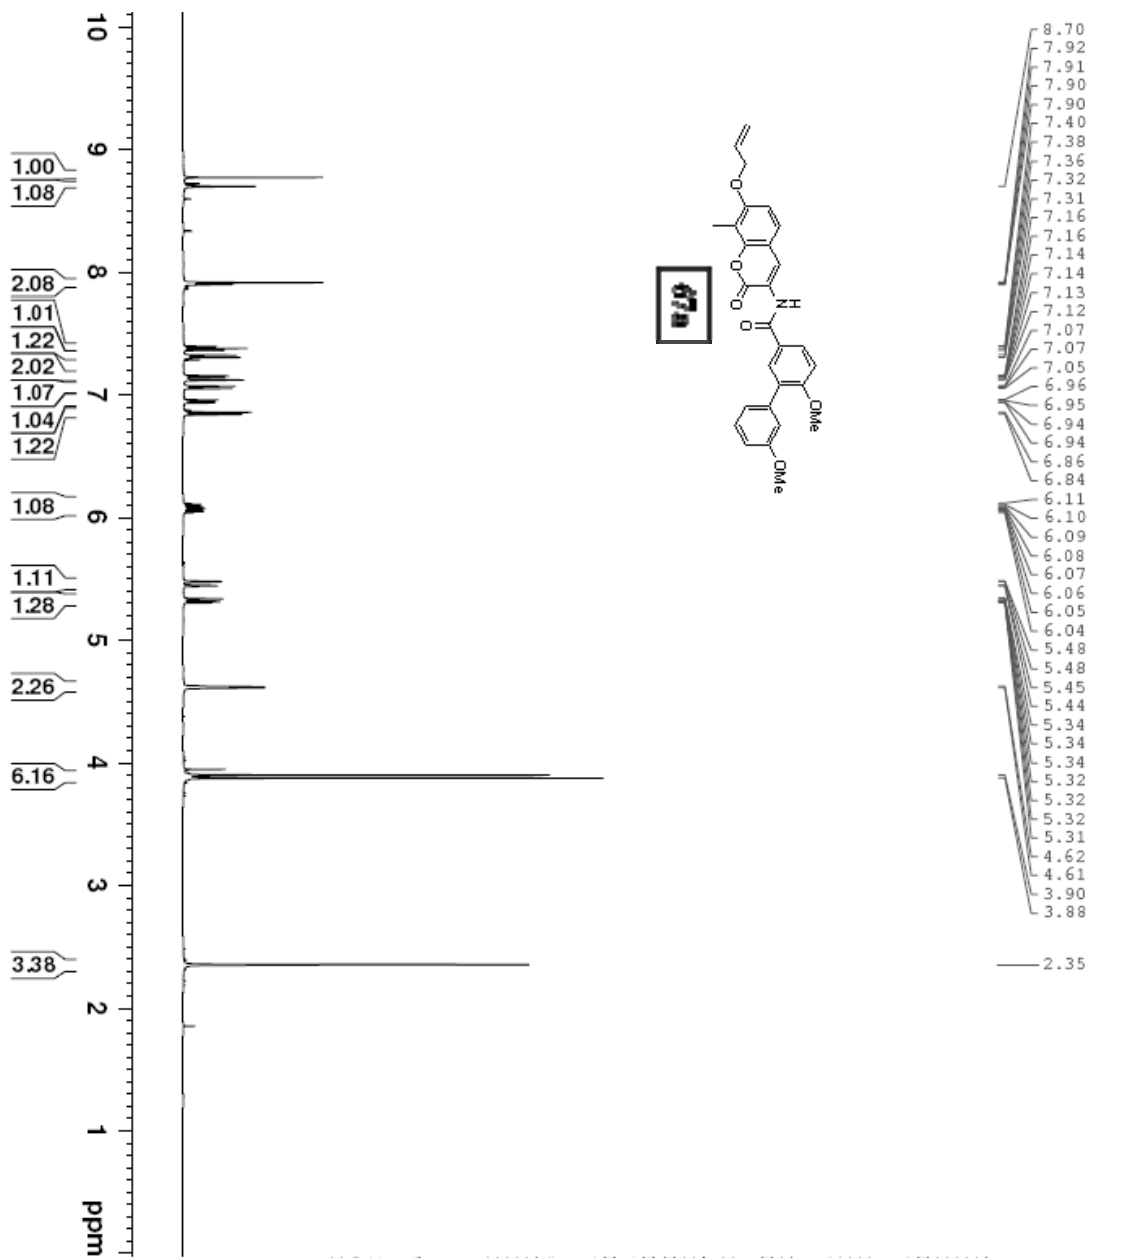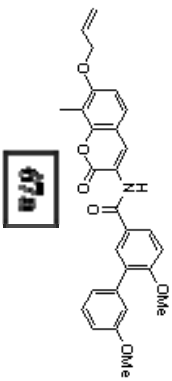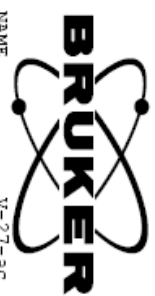

```

NAME V-27-ac
EXPNO 2
PROCNO 1
Date_ 20090212
Time 14.08
INSTRUM spect
PROBHD 5 mm BBO BB-1H
PULPROG zg30
TD 65536
SOLVENT CDCl3
NS 16
DS 2
SWH 10330.578 Hz
FIDRES 0.157632 Hz
AQ 3.1720407 sec
RG 4
DW 48.400 usec
DE 6.00 usec
TE 297.2 K
D1 1.00000000 sec
ID0 1

===== CHANNEL f1 =====
NUC1 1H
P1 8.60 usec
PL1 -5.00 dB
SFO1 500.1300885 MHz
SI 32768
SF 500.1300000 MHz
WDW EM
SSB 0
LB 0.30 Hz
GB 0
PC 1.00
    
```

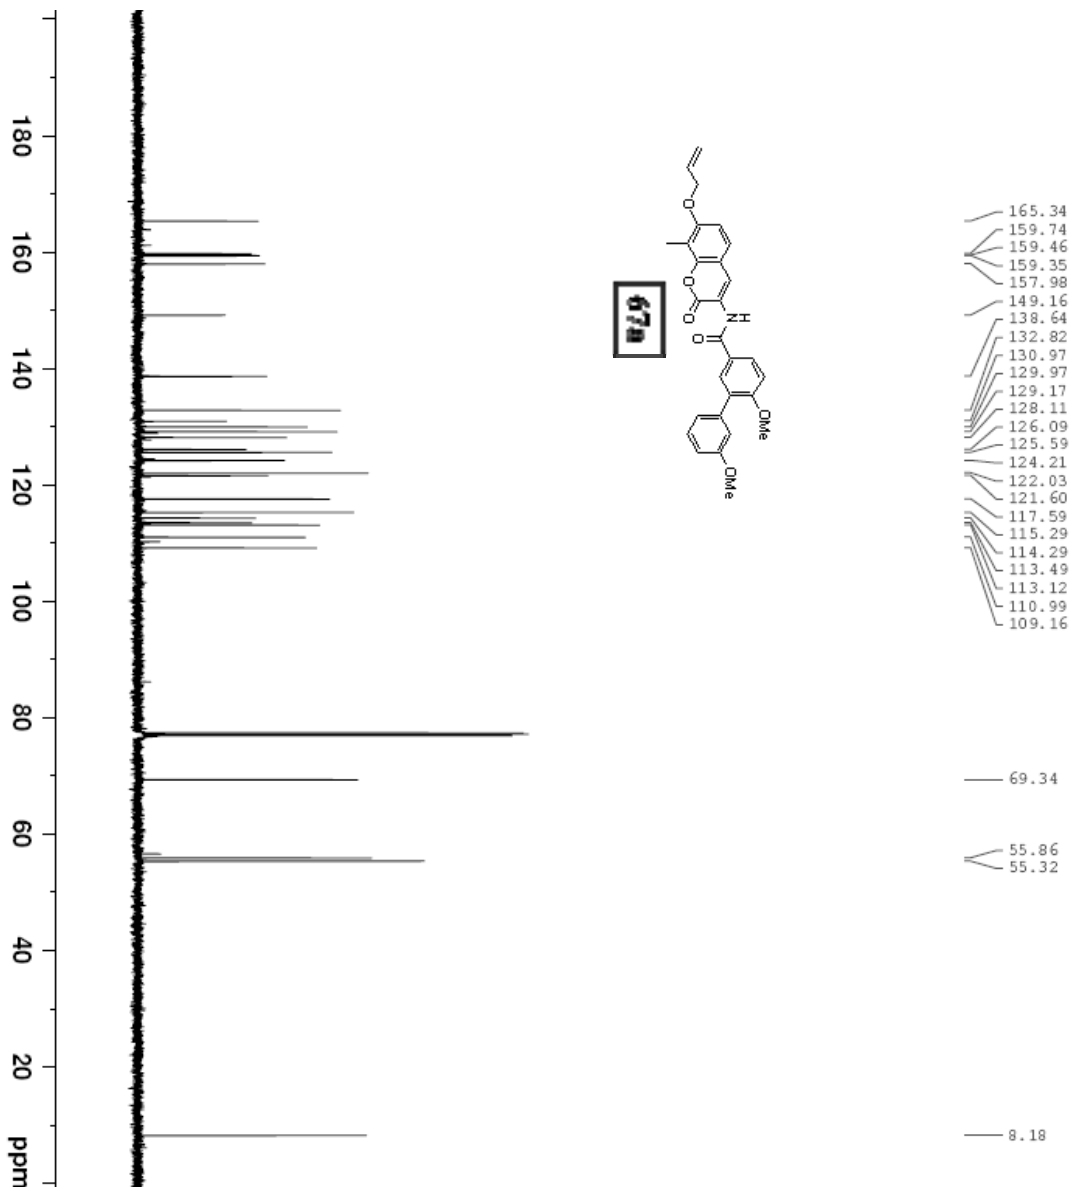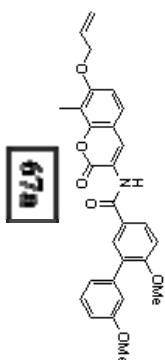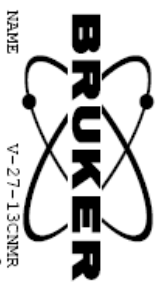

V-27-13CNMR

|         |                |
|---------|----------------|
| NAME    | 2              |
| EXPNO   | 1              |
| PROCNO  | 2              |
| Date_   | 20090212       |
| Time_   | 14.18          |
| INSTRUM | spect          |
| PROBHD  | 5 mm BBO BB-1H |
| PULPROG | zgpg30         |
| TD      | 65536          |
| SOLVENT | CDCl3          |
| NS      | 486            |
| DS      | 4              |
| SWH     | 30030.029 HZ   |
| FIDRES  | 0.458222 HZ    |
| AQ      | 1.0912410 sec  |
| RG      | 32768          |
| DM      | 16.650 usec    |
| DE      | 6.00 usec      |
| TE      | 298.2 K        |
| D1      | 0.15000001 sec |
| d11     | 0.03000000 sec |
| DELTA   | 0.05000000 sec |
| TD0     | 1              |

|                        |                 |
|------------------------|-----------------|
| ===== CHANNEL f1 ===== |                 |
| NUC1                   | 13C             |
| P1                     | 8.90 usec       |
| PL1                    | -1.15 dB        |
| SFO1                   | 125.7703643 MHZ |
| ===== CHANNEL f2 ===== |                 |
| CPDPRG2                | waltz16         |
| NUC2                   | 1H              |
| PCPD2                  | 95.00 usec      |
| PL2                    | -5.00 dB        |
| PL12                   | 15.86 dB        |
| PL13                   | 30.00 dB        |
| SFO2                   | 500.1320005 MHZ |
| SI                     | 32768           |
| SF                     | 125.7577090 MHZ |
| WDW                    | EM              |
| SSB                    | 0               |
| LB                     | 1.00 HZ         |
| GB                     | 0               |
| PC                     | 1.40            |

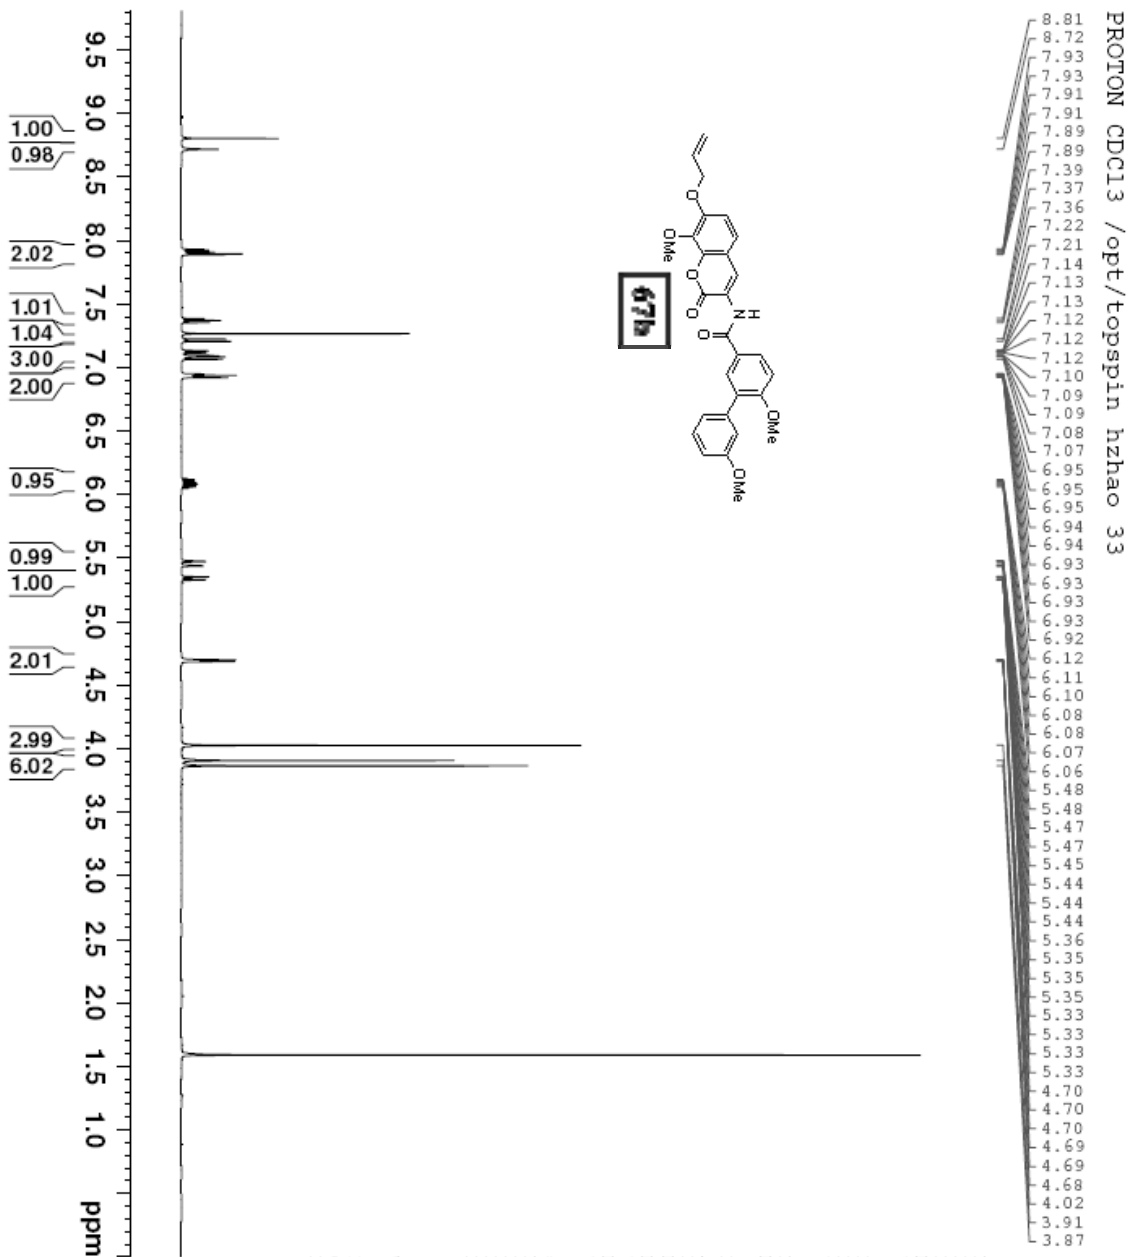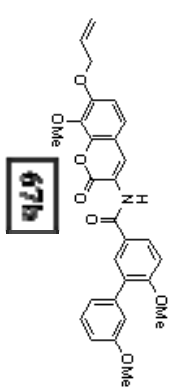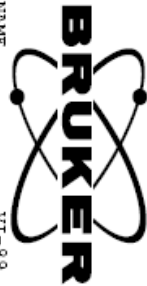

```

NAME VI-89
EXPNO 1
PROCNO 1
Date_ 20090716
Time_ 23.02
INSTRUM spect
PROBHD 5 mm CPDUL 13C
PULPROG zg30
TD 65536
SOLVENT CDCl3
NS 18
DS 2
SWH 10330.578 Hz
FIDRES 0.157632 Hz
AQ 3.1719923 sec
RG 2050
DE 48.400 usec
TE 6.50 usec
TD0 1.00000000 sec
===== CHANNEL f1 =====
NUC1 1H
P1 15.00 usec
PL1 6.00 dB
PL1W 8.64411545 W
SFO1 500.1330889 MHz
SI 32768
SF 500.1300012 MHz
WDW EM
SSB 0
LB 0.30 Hz
GB 0
PC 1.00
    
```

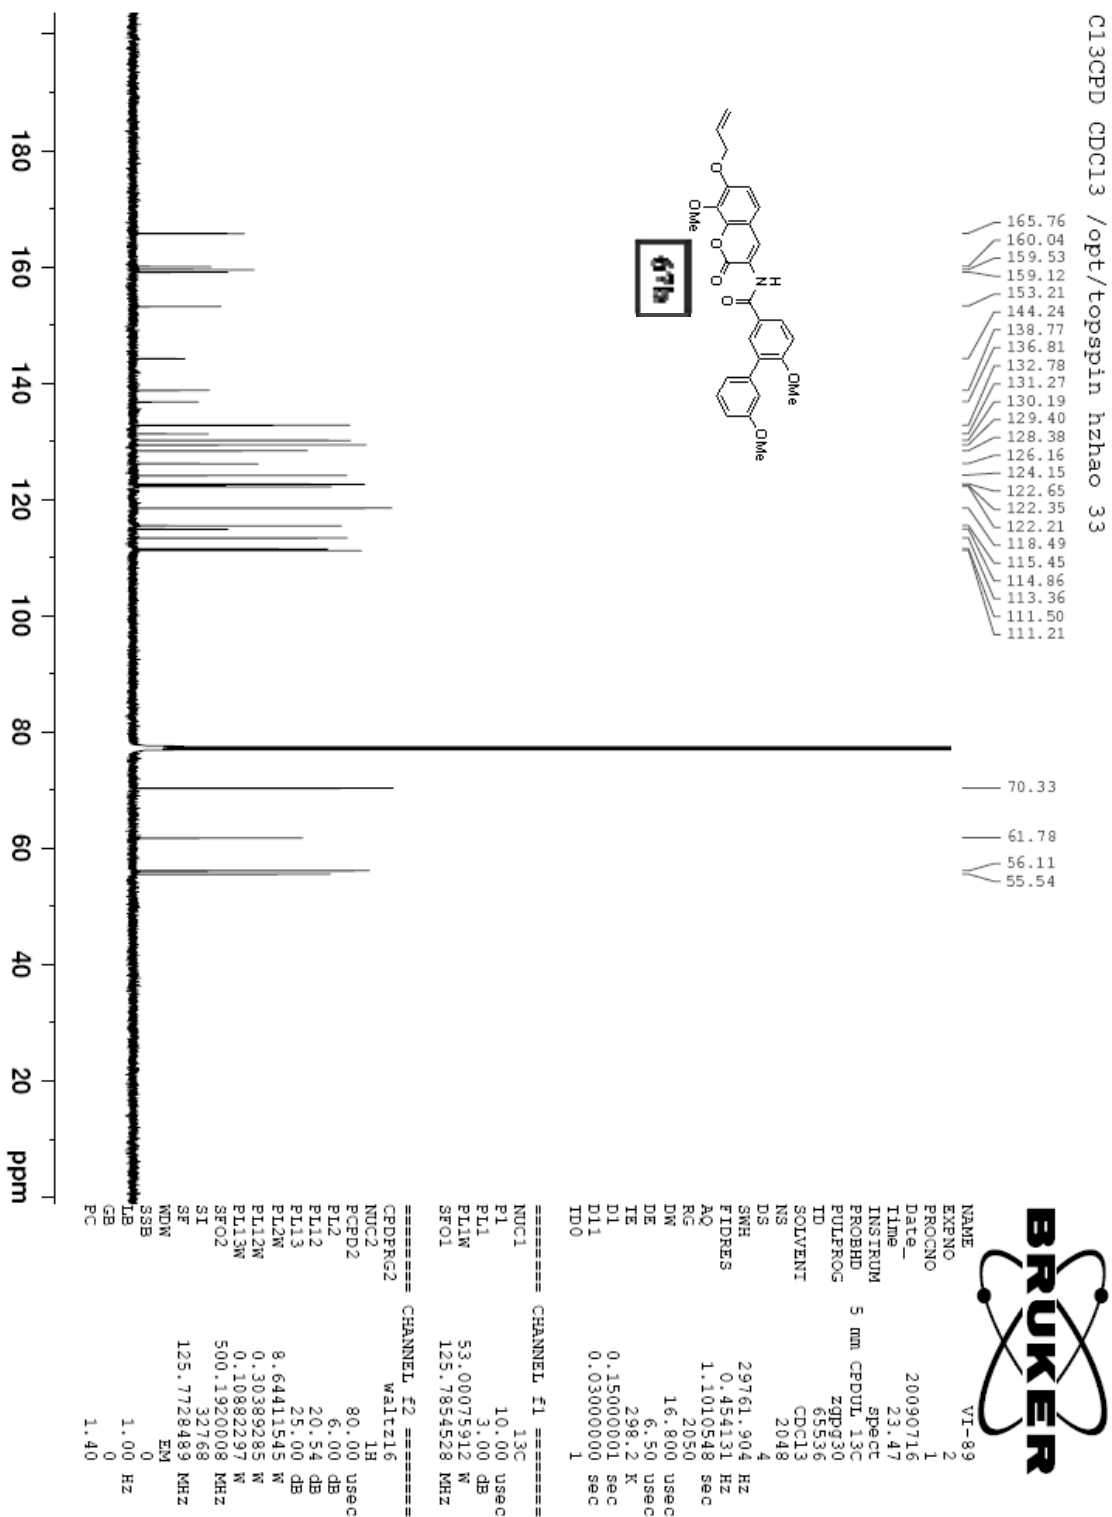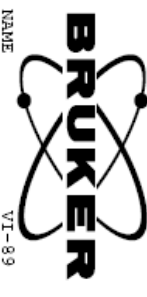



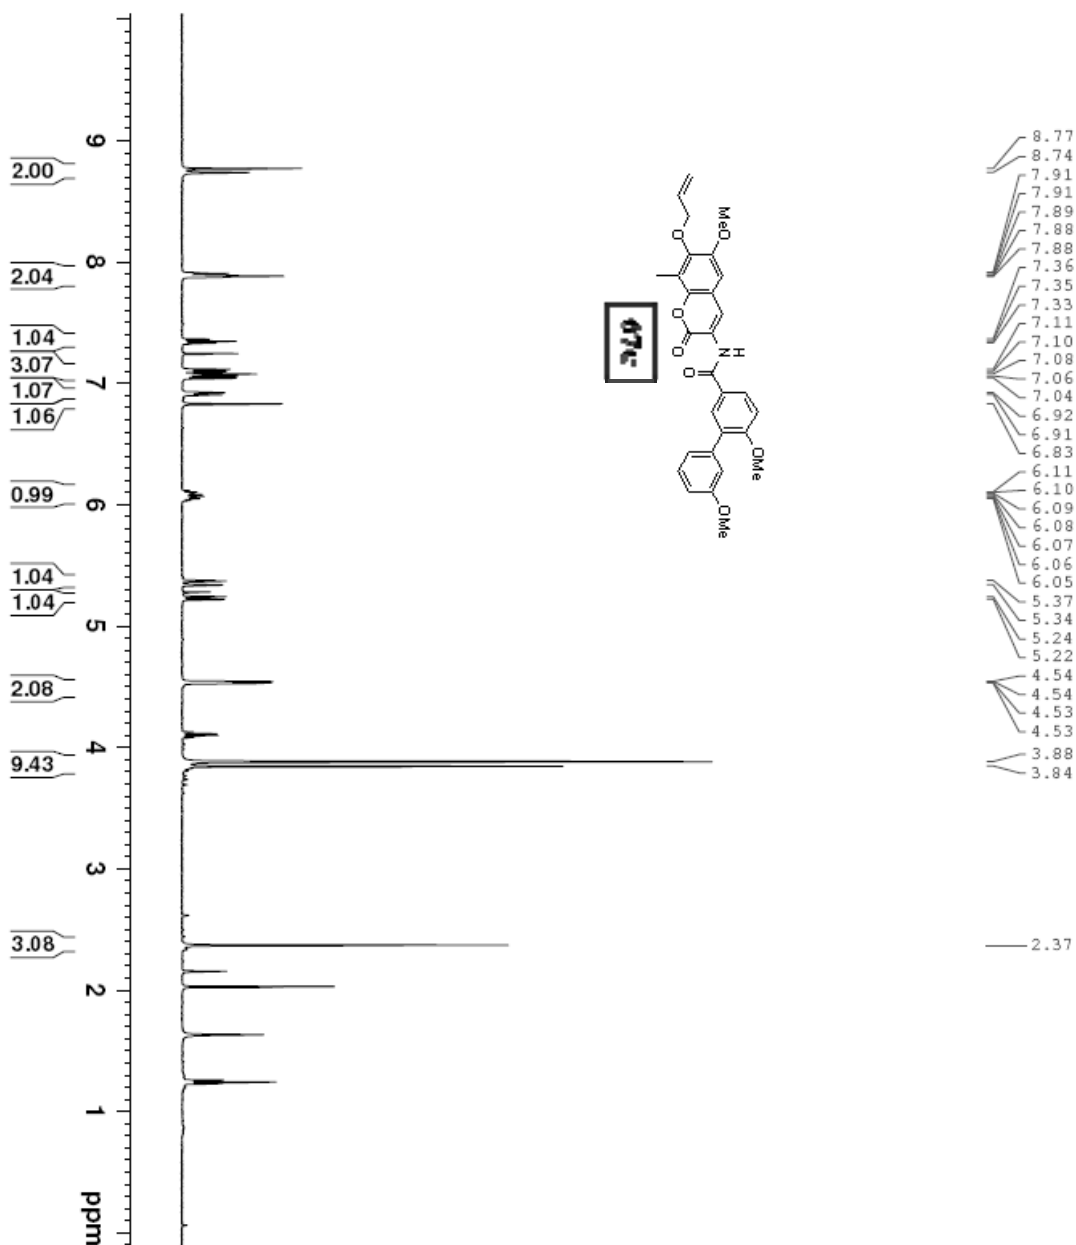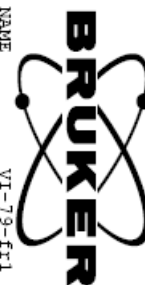

```

NAME          VI-73-fr1
EXRNO        2
PROCNO       1
Date_        20090716
Time         13.23
INSTRUM      spect
PROBHD       5 mm BBO BB-1H
PULPROG      zg30
ID           2930
SOLVENT      CDCl3
NS           16
DS           2
SWH          10330.578 Hz
FIDRES       0.157632 Hz
AQ           3.1720407 sec
RG           4
DW           48.400 usec
DE           6.00 usec
TE           299.2 K
D1           1.000000000 sec
TD0          1

===== CHANNEL f1 =====
NUC1         1H
P1           8.60 usec
PL1          -5.00 dB
SFO1         500.1330885 MHz
SI           32768
SF           500.1300207 MHz
WDW          EM
SSB          0
LB           0.30 Hz
GB           0
PC           1.00
    
```

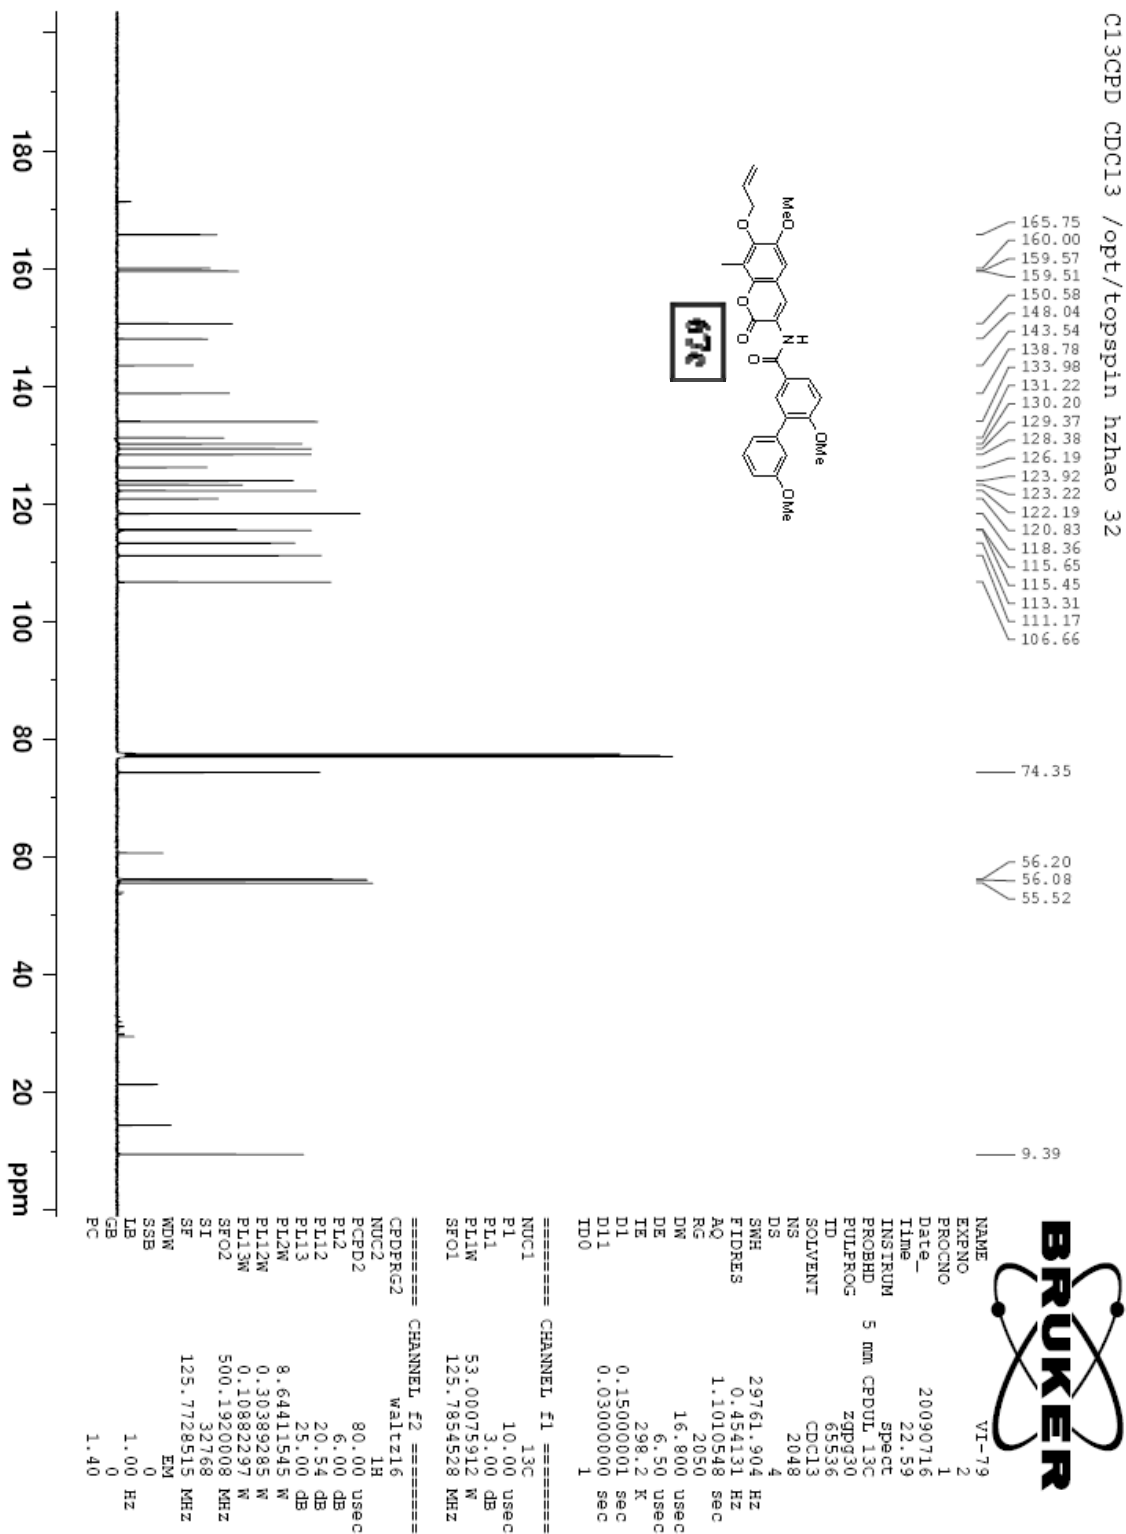

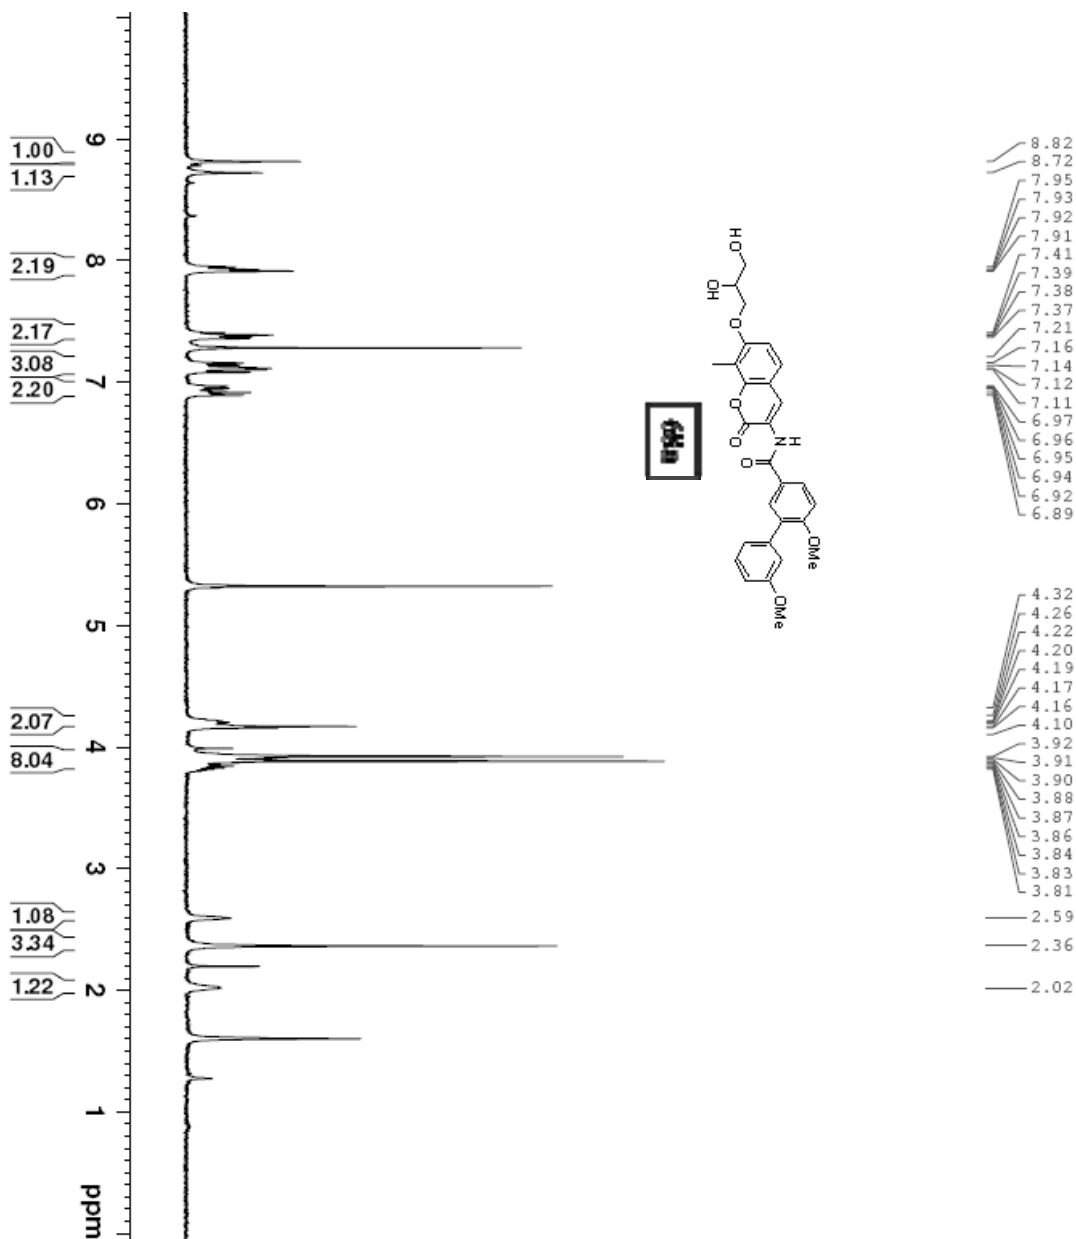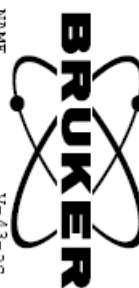

```

NAME V-43-ac
EXPNO 1
PROCNO 1
Date_ 20090213
Time 13.43
INSTRUM dtx400
PROBHD 5 mm QNP 1H/13
PULPROG zg30
TD 65536
FIDRES 0.126314 Hz
AQ 3.9584243 sec
RG 4
DE 60.400 usec
TE 294.4 K
D1 1.00000000 sec
TD0 1

===== CHANNEL f1 =====
NUC1 1H
P1 10.50 usec
PL1 -5.00 dB
SFO1 400.1324710 MHz
SI 32768
SF 400.1300000 MHz
WDW EM
SSB 0
LB 0.30 Hz
GB 0
PC 1.00
    
```

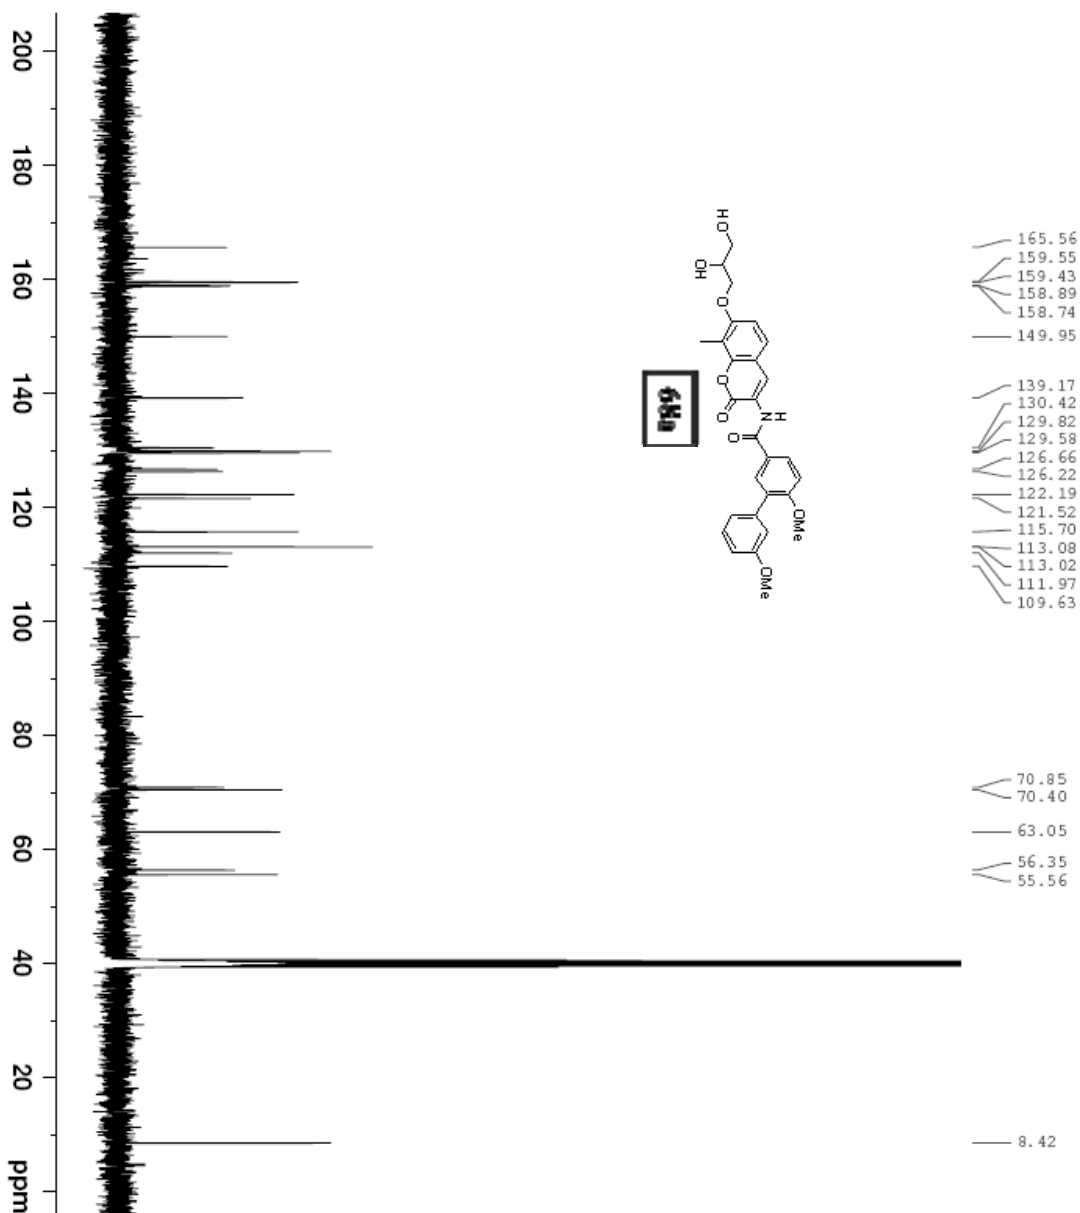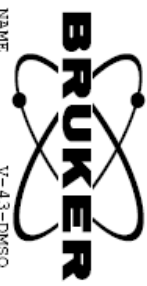

```

NAME V-43-DMSO
EXPNO 1
PROCNO 1
Date_ 20090218
Time 13.06
INSTRUM dx400
PROBHD 5 mm QNP 1H/13
PULPROG zgpg30
TD 65536
SOLVENT DMSO
NS 338
DS 4
SWH 23980.814 HZ
FIDRES 0.365918 HZ
AQ 1.3664756 sec
RG 32768
DM 20.850 usec
DE 6.00 usec
TE 294.5 K
D1 2.00000000 sec
d11 0.03000000 sec
DELTA 1.89999998 sec
TD0 1

===== CHANNEL f1 =====
NUC1 13C
P1 9.85 usec
PL1 -2.00 dB
SFO1 100.6228298 MHz

===== CHANNEL f2 =====
CPDPRG2 waltz16
NUC2 1H
PCPD2 100.00 usec
PL2 -5.00 dB
PL12 14.58 dB
PL13 16.00 dB
SFO2 400.1316005 MHz
SI 32768
SF 100.6127690 MHz
MDW EM
SSB 0
LB 1.00 HZ
GB 0
PC 1.40
    
```

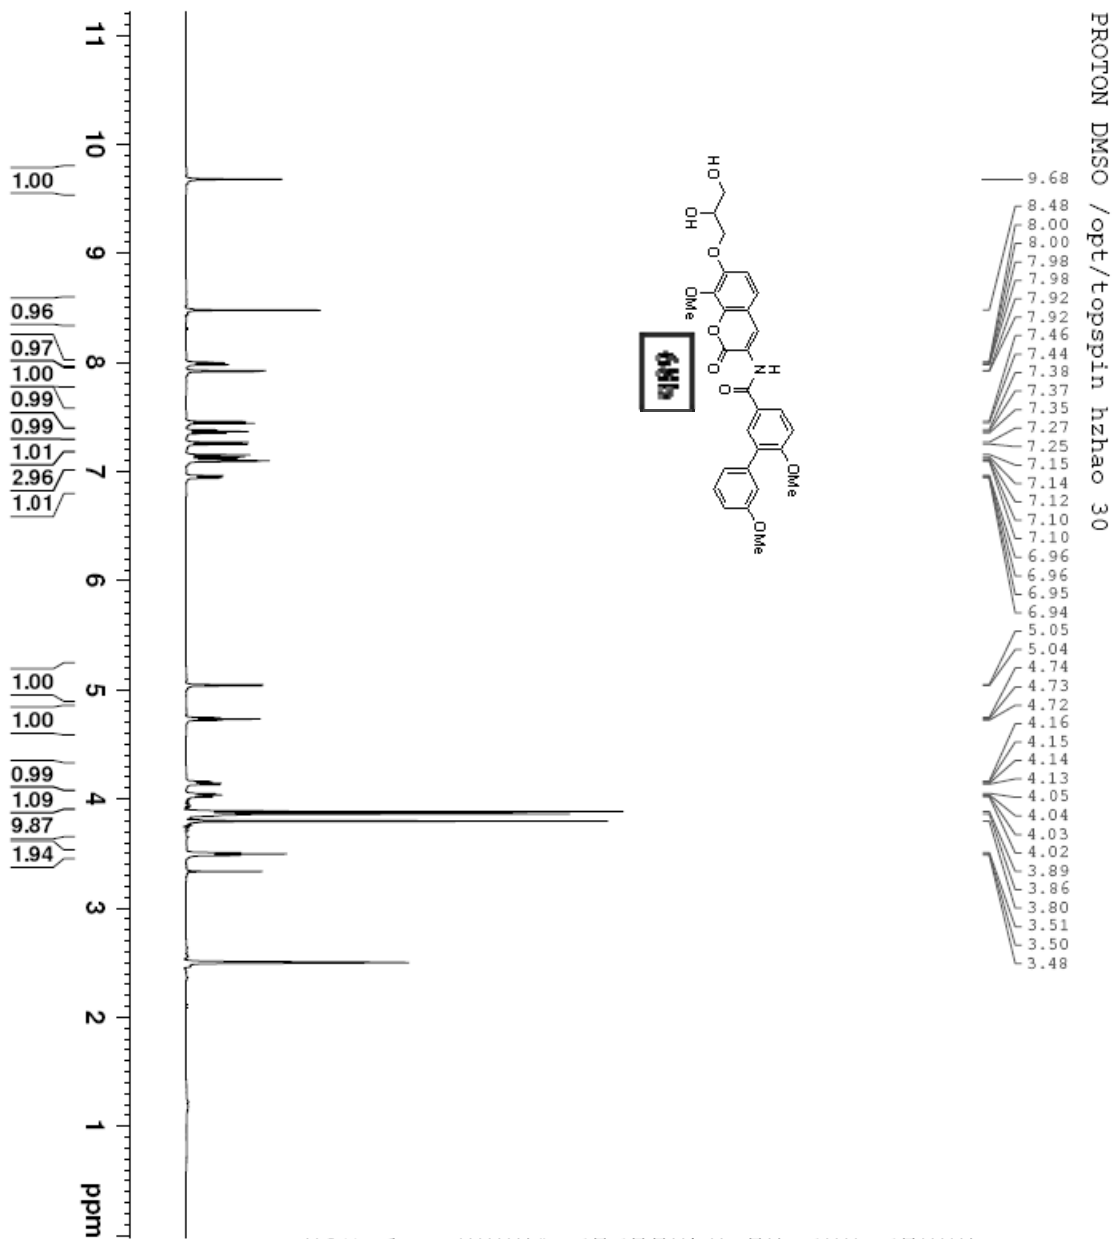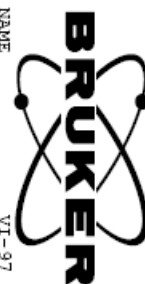

```

NAME          VI-97
EXPNO         1
PROCNO        1
Date_         20090722
Time         13.15
INSTRUM       spect
PROBHD        5 mm CPDUL 13C
PULPROG       zg30
ID            65536
SOLVENT       DMSO
NS            16
DS            2
SWH           10330.578 Hz
FIDRES        0.157632 Hz
AQ            3.171923 sec
RG            2050
DN            48.400 usec
DE            6.50 usec
TE            298.2 K
D1            1.00000000 sec
TD0           1

===== CHANNEL f1 =====
NUC1          1H
P1            15.00 usec
PL            6.00 dB
PT1W         8.6441545 W
SFO1         500.1930889 MHz
SI           32768
SF           500.1900000 MHz
WDW           EM
SSB           0
LB            0.30 Hz
GB            0
PC            1.00
    
```

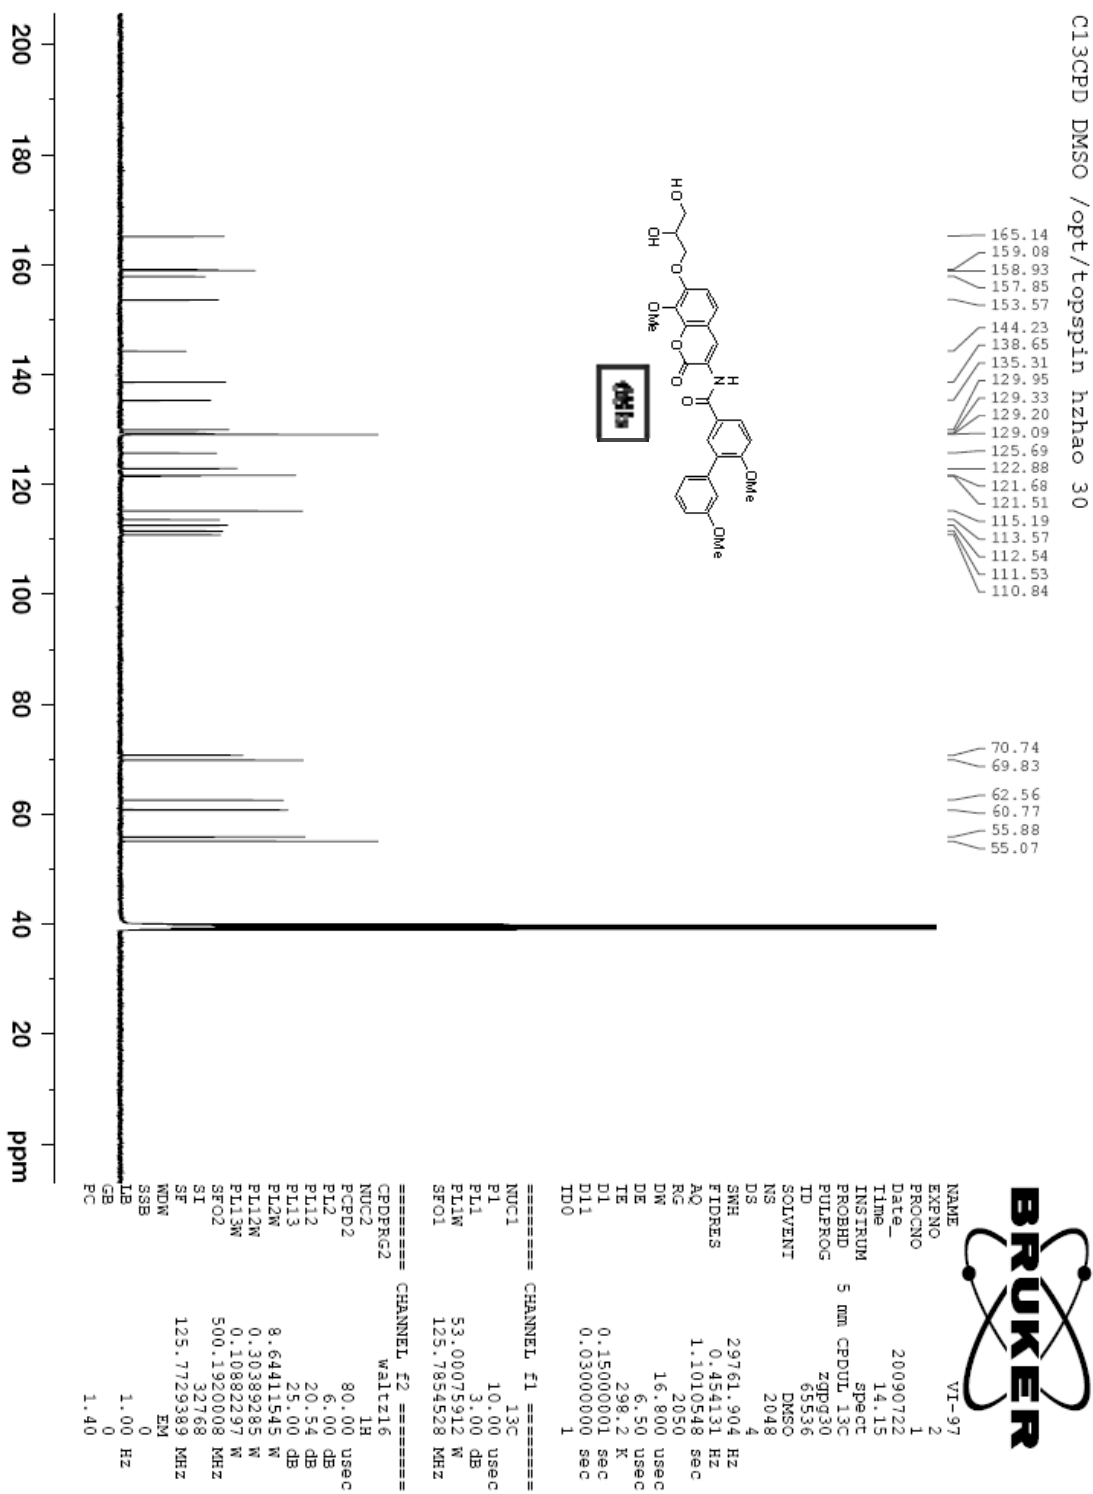

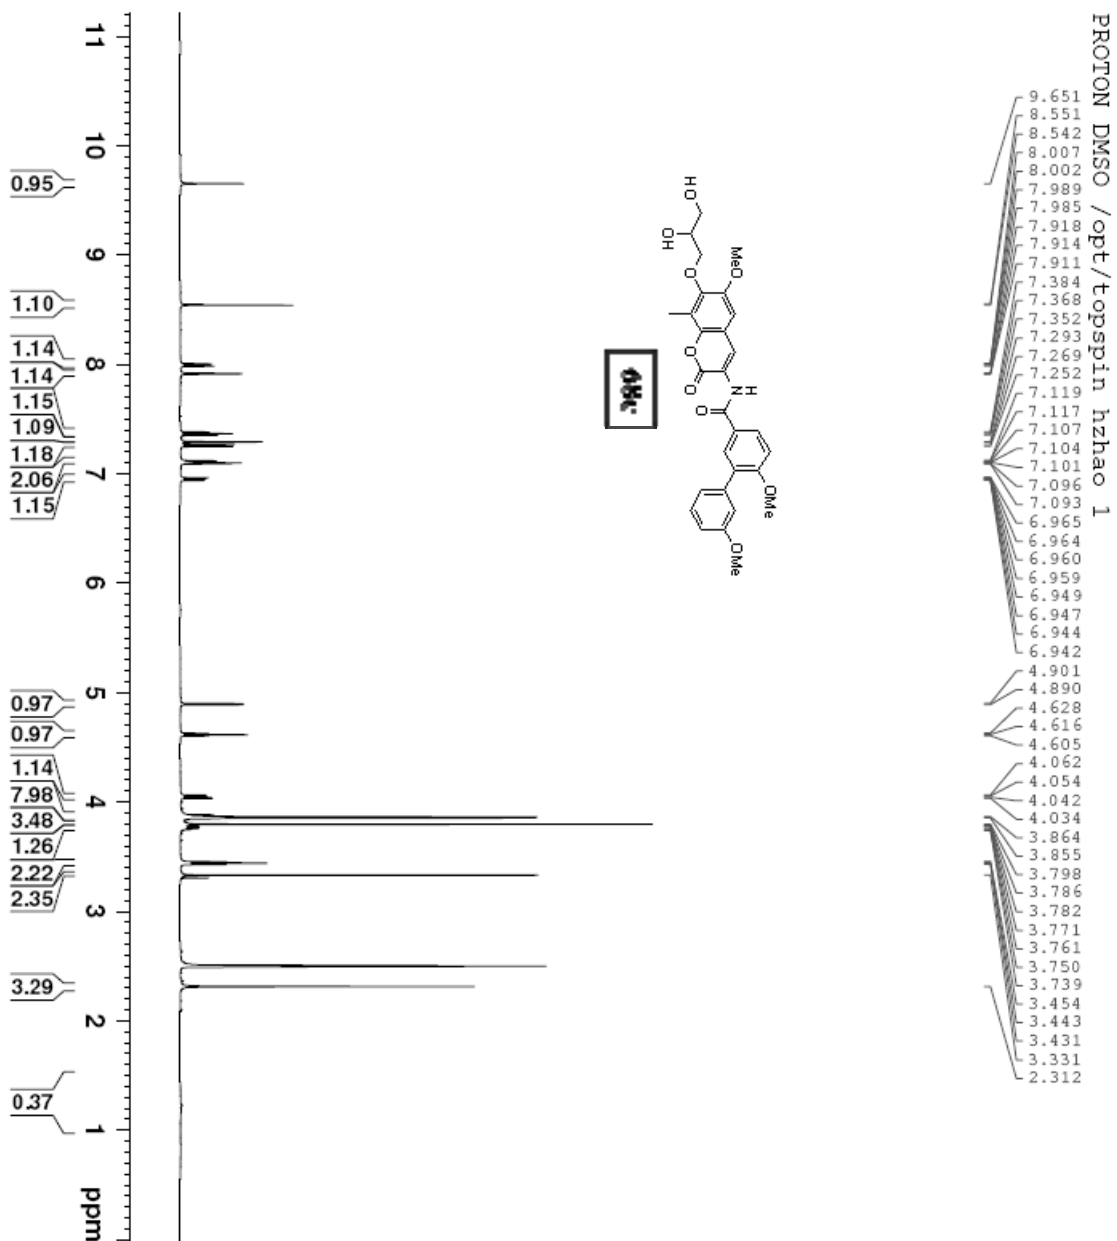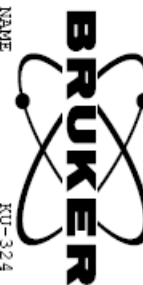

```

NAME          KU-324
EXPNO         1
PROCNO        1
Date_         20090805
Time_         9.00
INSTRUM       spect
PROBHD        5 mm CPDUL 13C
PULPROG       zg30
ID            65536
SOLVENT       DMSO
NS            16
DS            2
SWH           10330.578 Hz
FIDRES        0.157632 Hz
AQ            3.171923 sec
RG            2050
DW            48.400 usec
DE            6.50 usec
TE            298.2 K
D1            1.00000000 sec
TD0           1

===== CHANNEL f1 =====
NUC1          1H
P1            15.00 usec
PL1           6.00 dB
PL1W          8.64411545 W
SFO1          500.1930889 MHz
SI            32768
SF            500.1900001 MHz
WDW           EM
SSB           0
LB            0.30 Hz
GB            0
PC            1.00
    
```

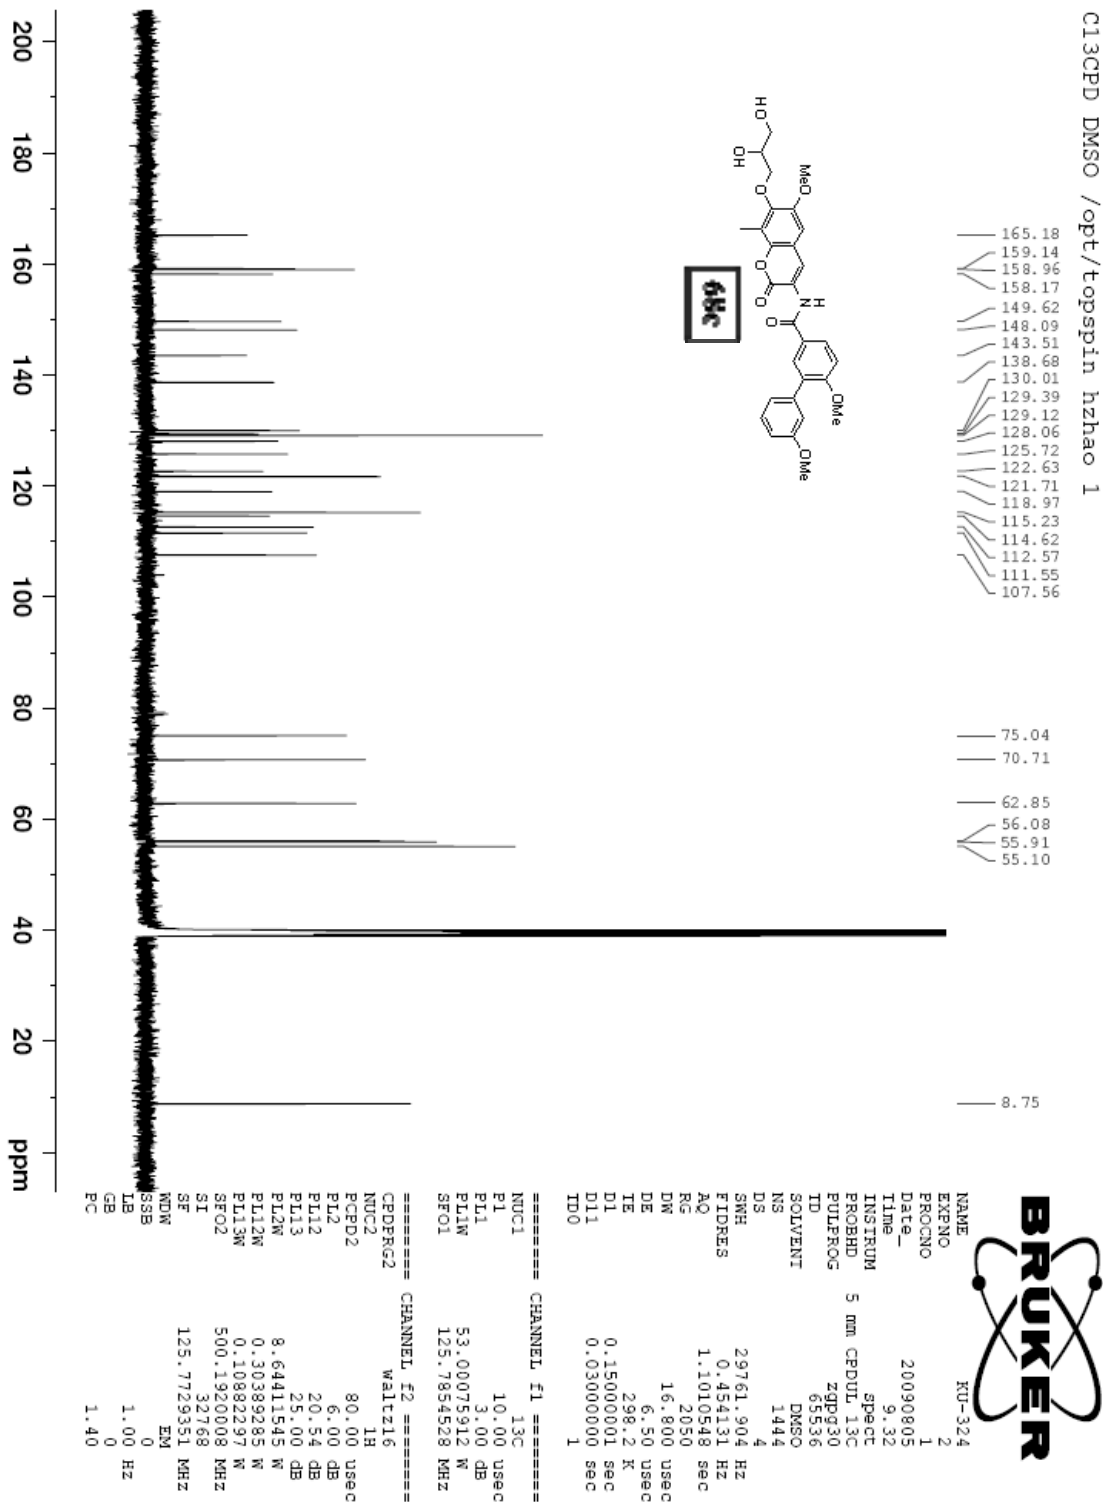



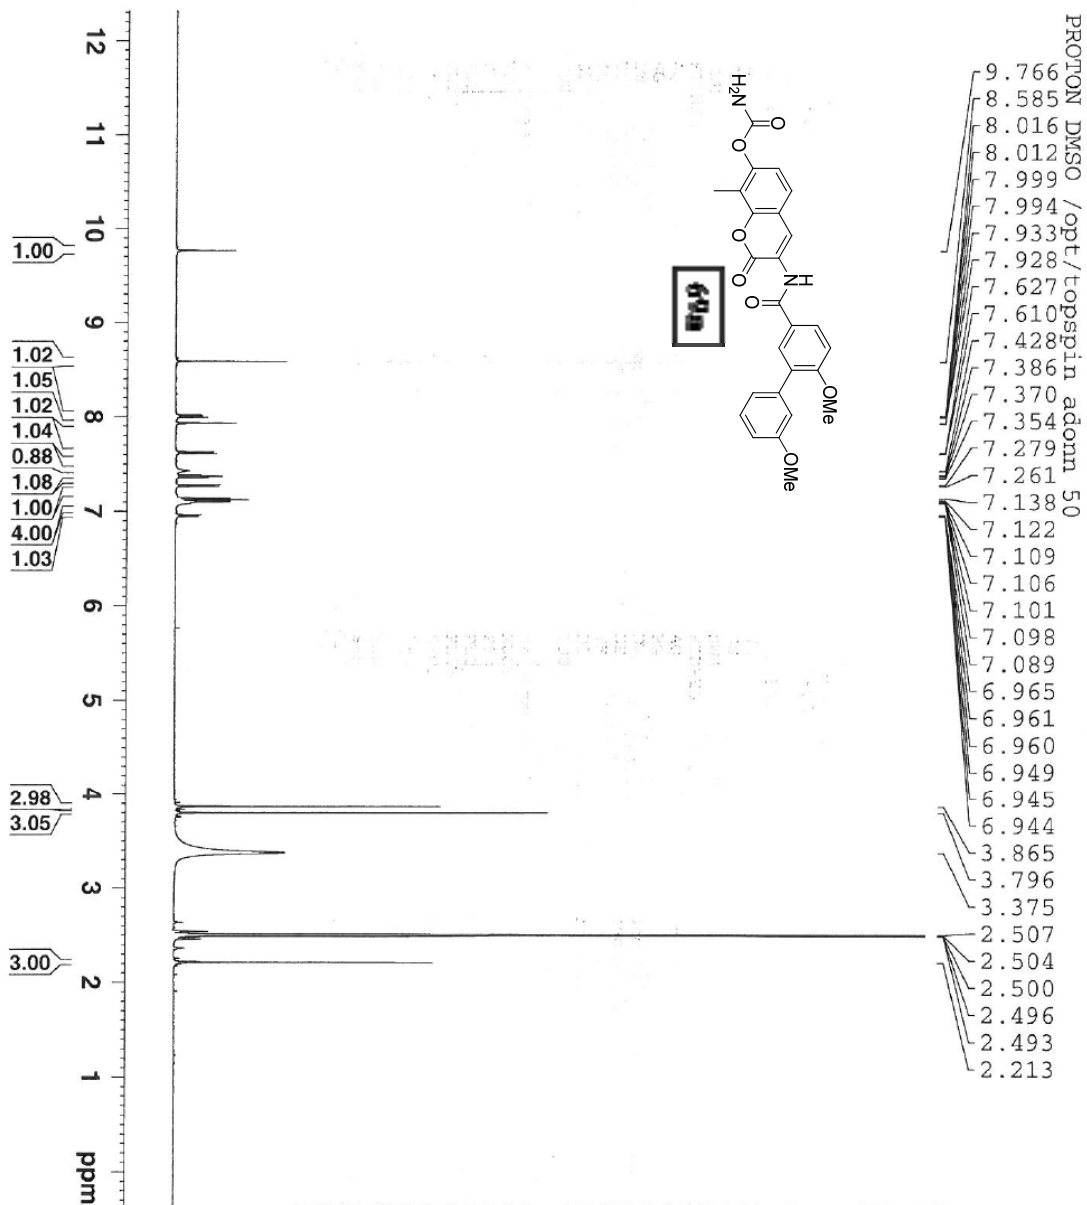

NAME MENH2  
 EXPNO 1  
 PROCNO 1  
 Date\_ 20090212  
 Time 16.53  
 INSTRUM spect  
 PROBED 5 mm CPDUL 13C  
 PULPROG zg30  
 TD 65536  
 SOLVENT DMSO  
 NS 16  
 DS 2  
 SWH 10330.578 Hz  
 FIDRES 0.157632 Hz  
 AQ 3.171923 sec  
 RG 2050  
 DW 48.400 usec  
 DE 6.50 usec  
 TE 292.0 K  
 DL 1.00000000 sec  
 TDO 1

===== CHANNEL f1 =====  
 NUC1 1H  
 P1 15.00 usec  
 PL1 6.00 dB  
 PL1W 8.64411545 W  
 SFO1 500.1930889 MHz  
 SI 32768  
 SF 500.1899999 MHz  
 WDW EM  
 SSB 0  
 LB 0.30 Hz  
 GB 0  
 PC 1.00

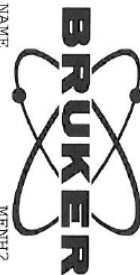

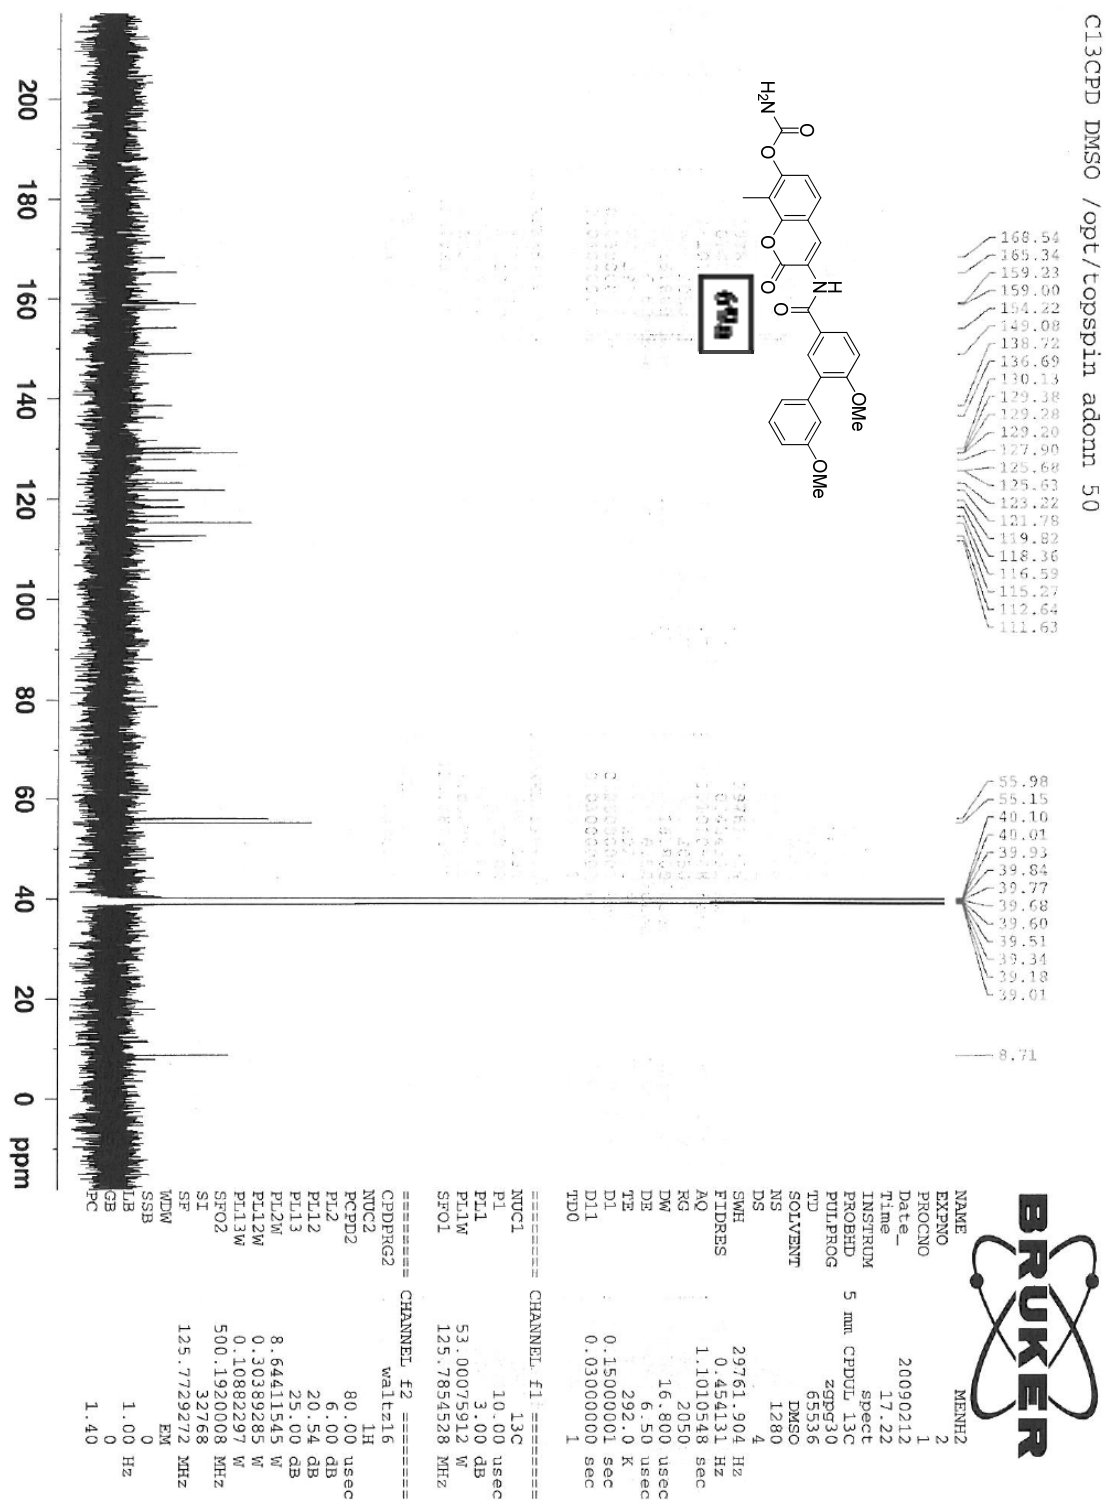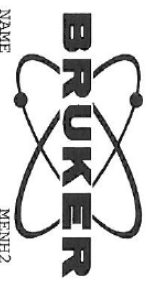

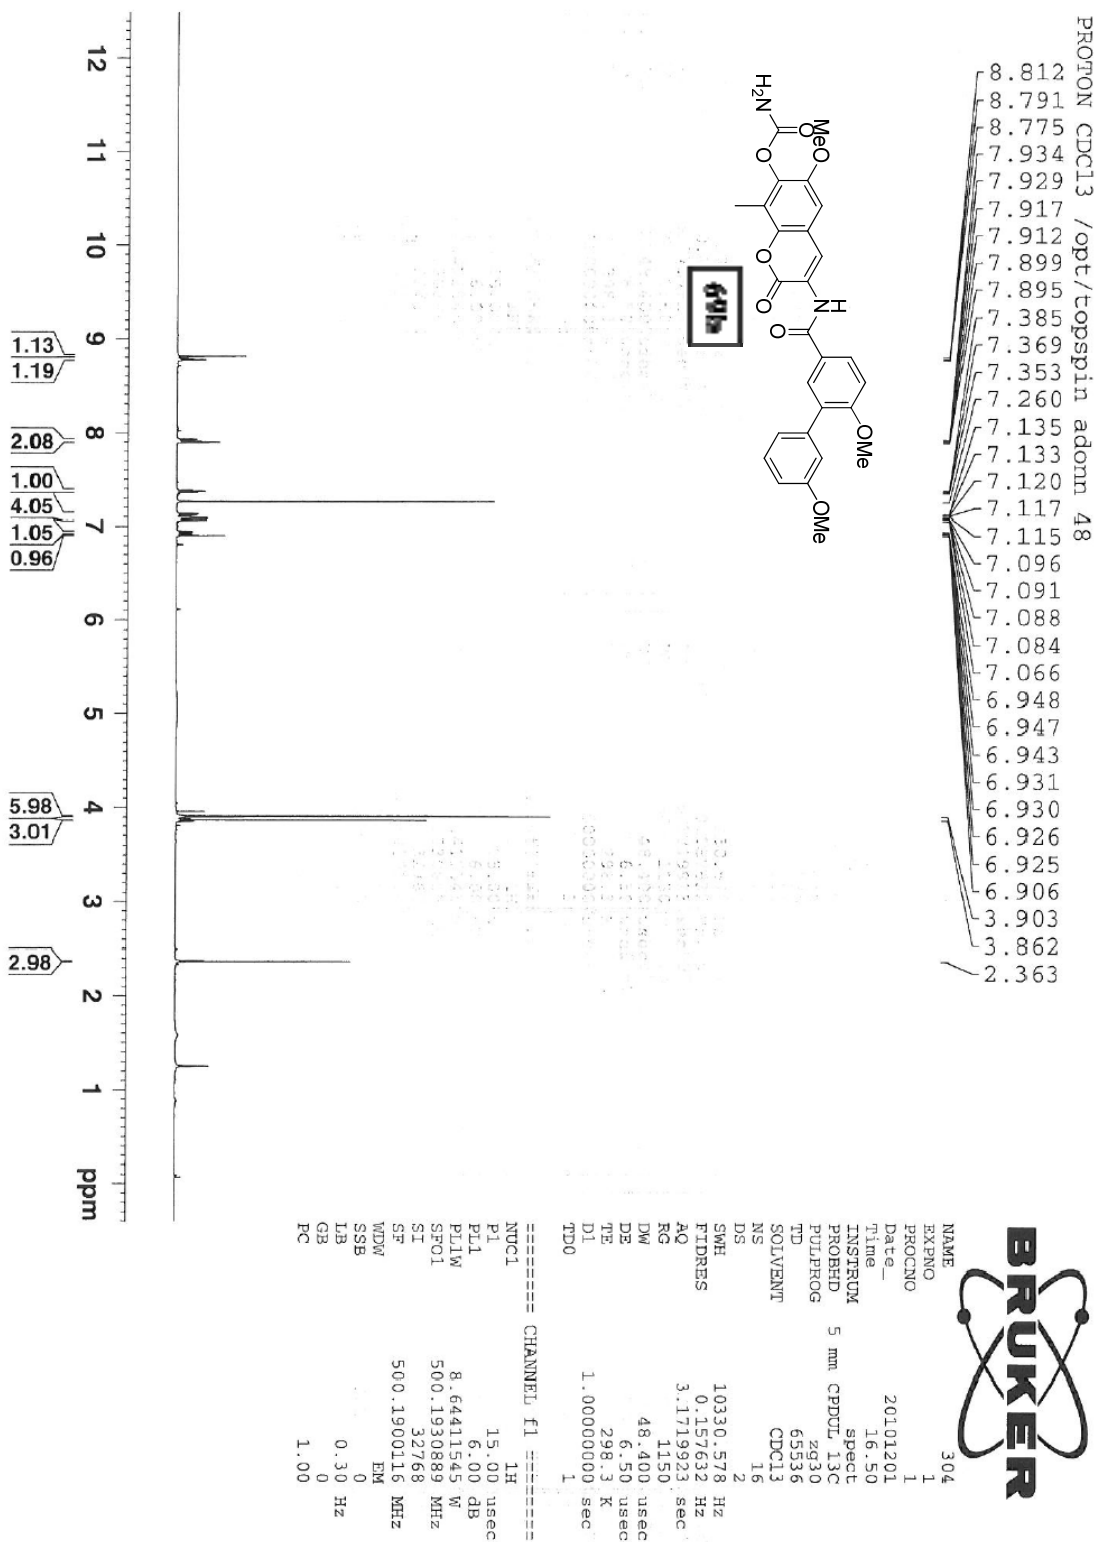

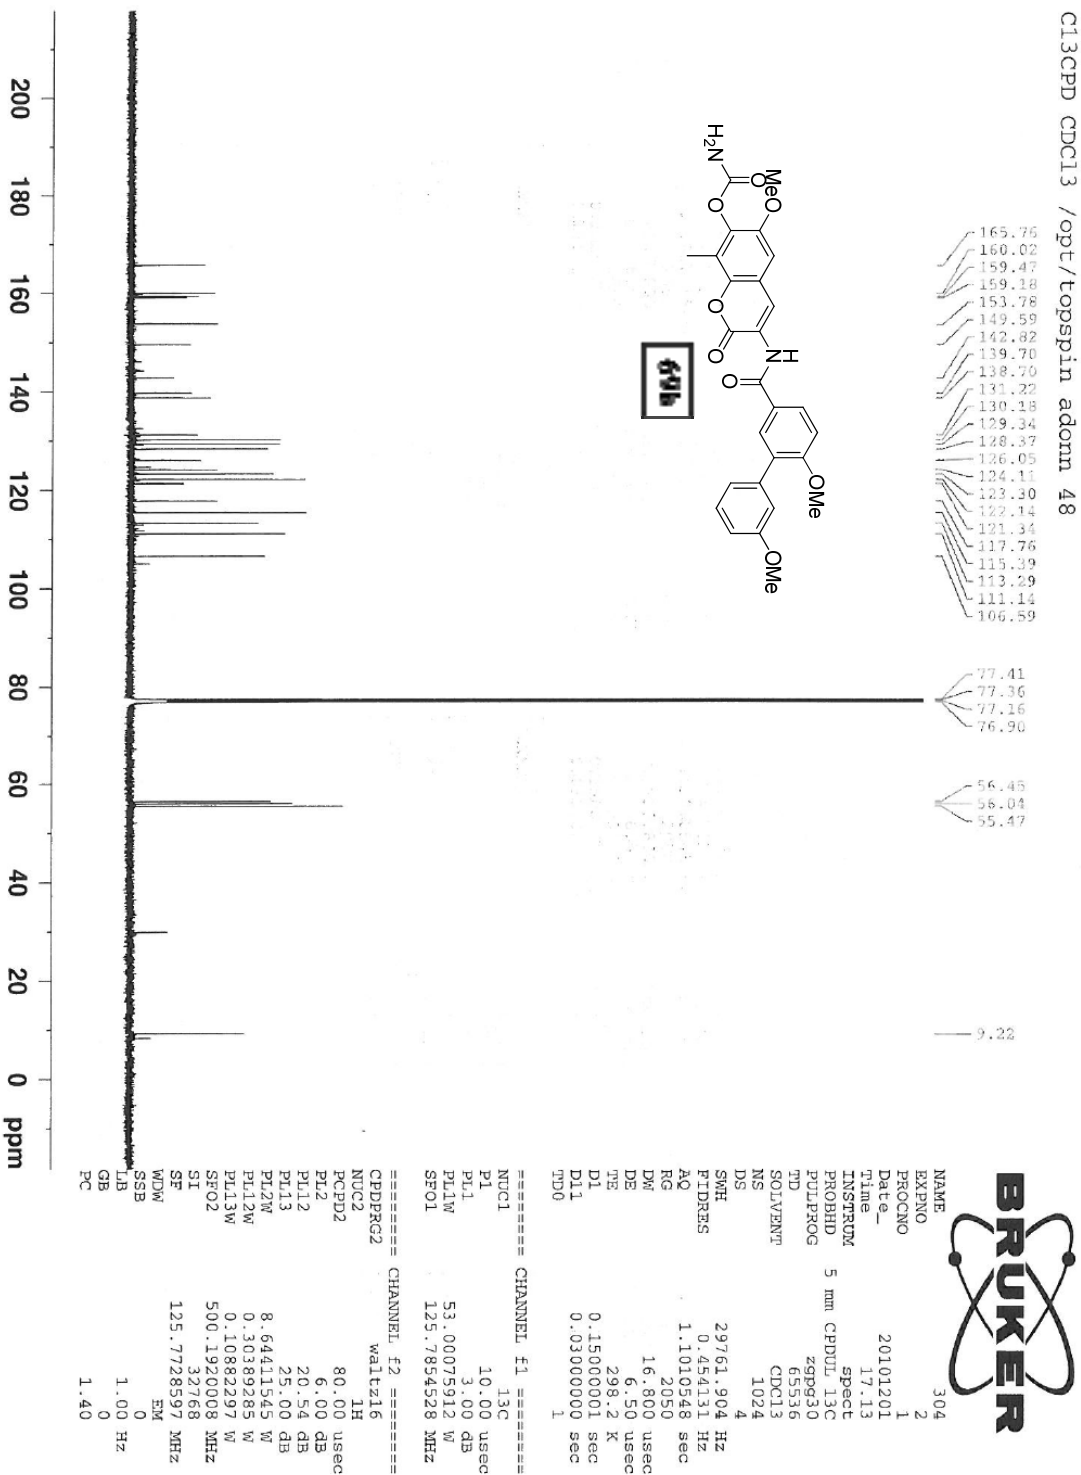

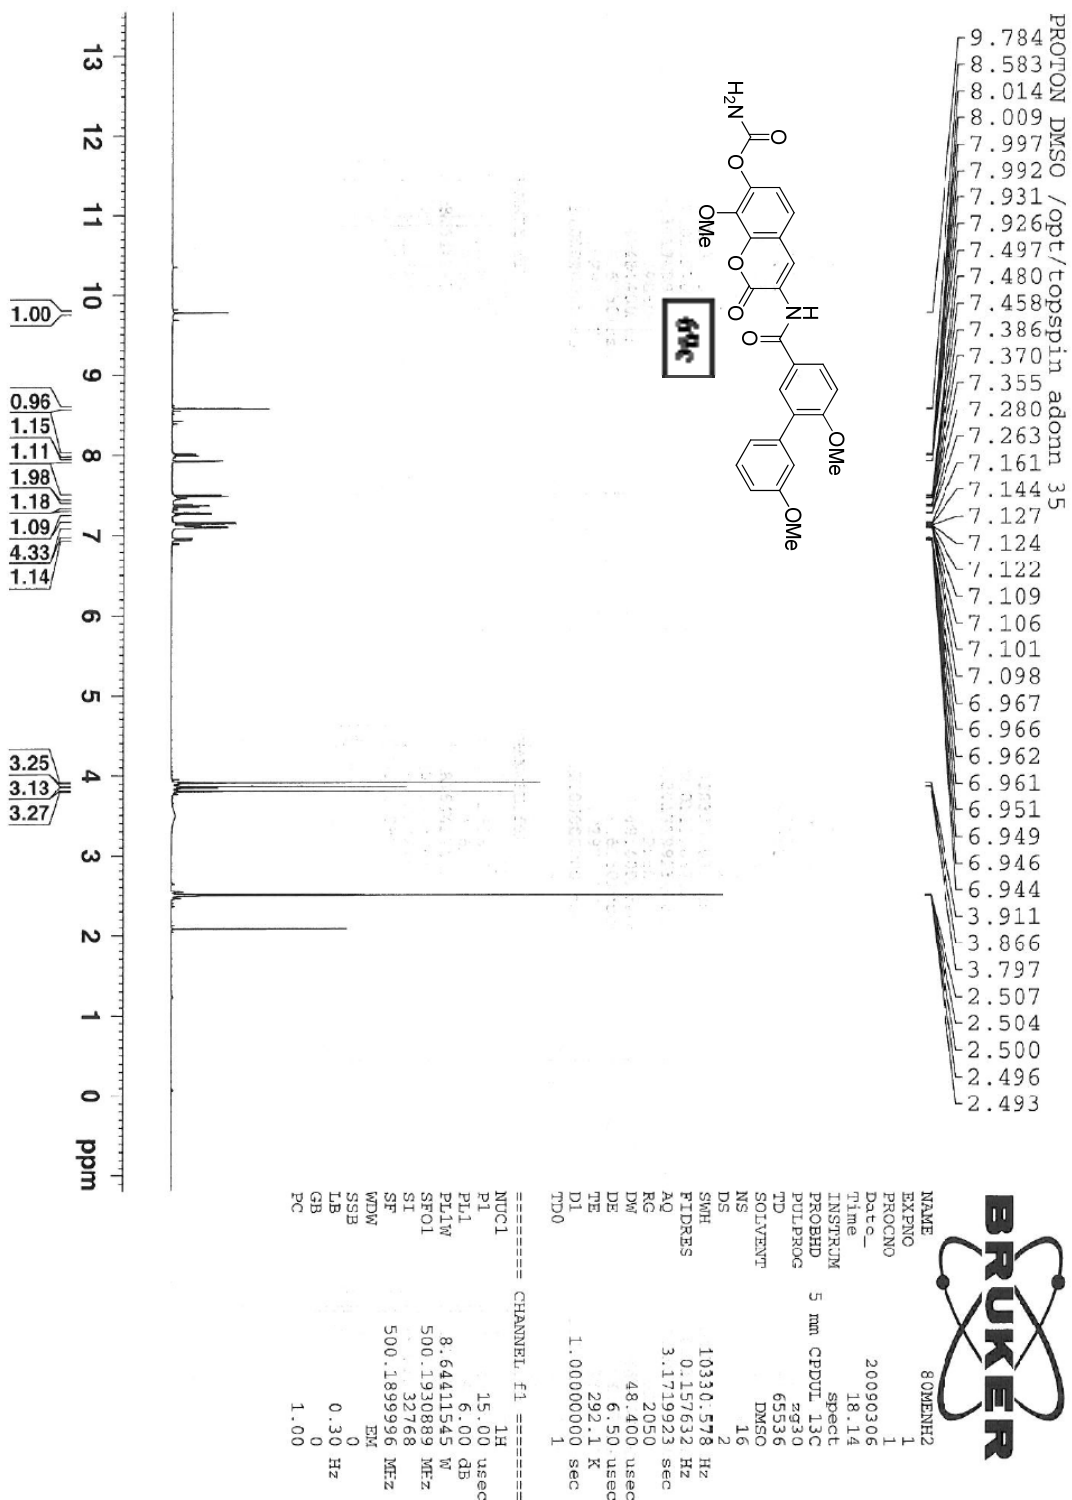

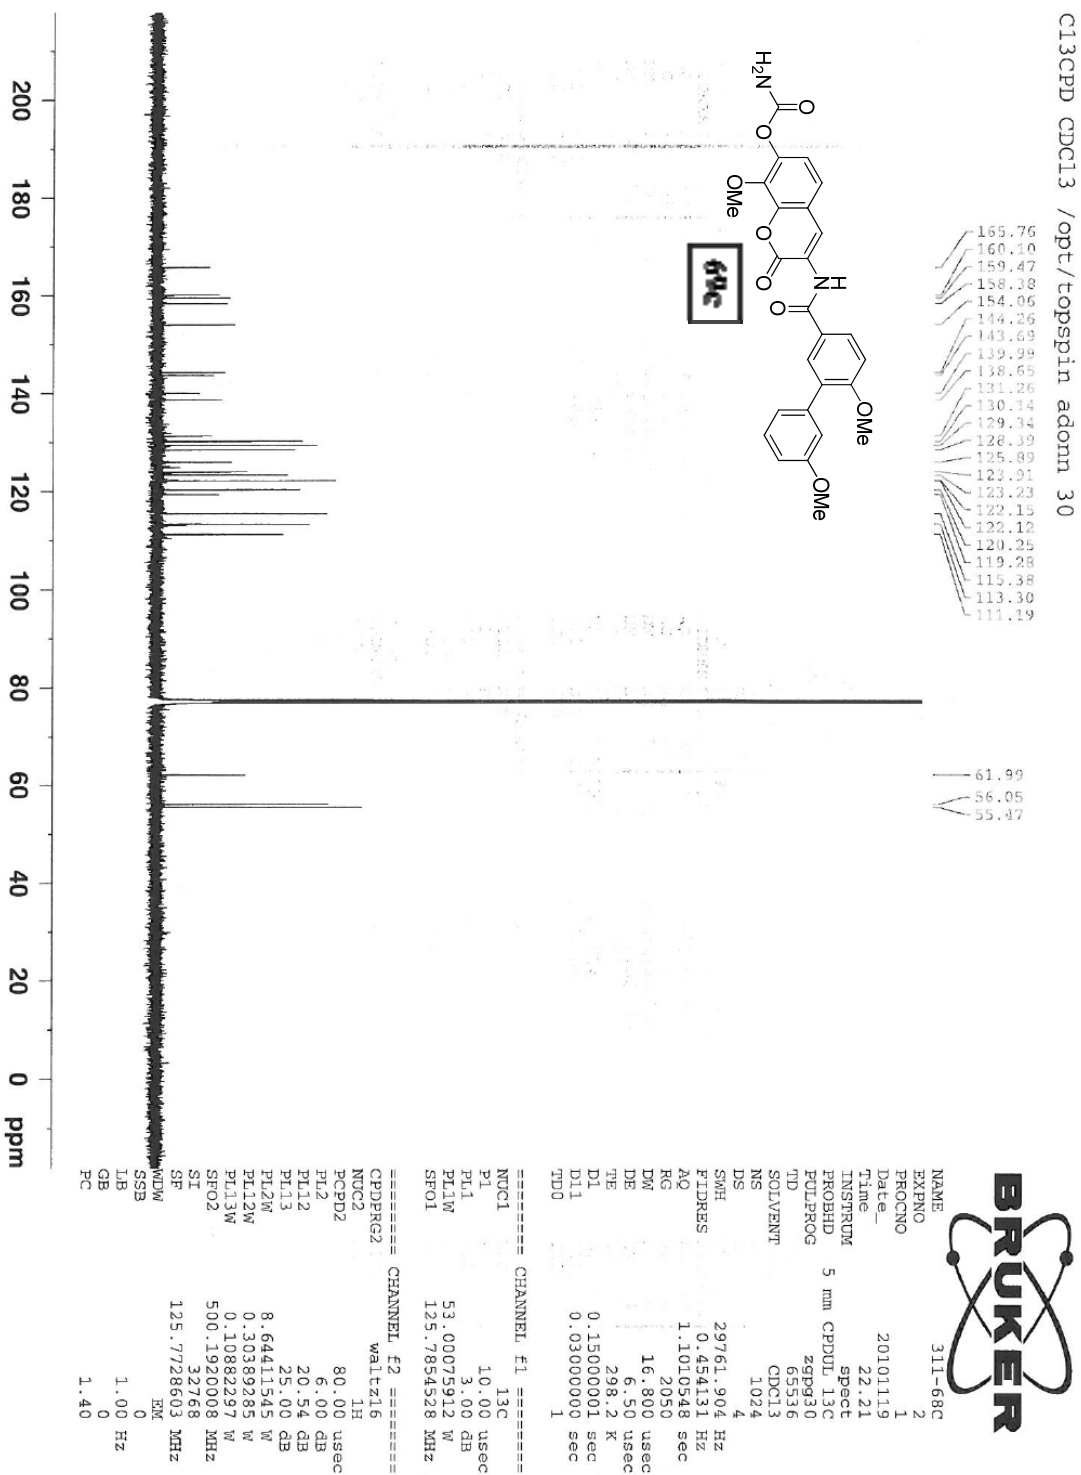



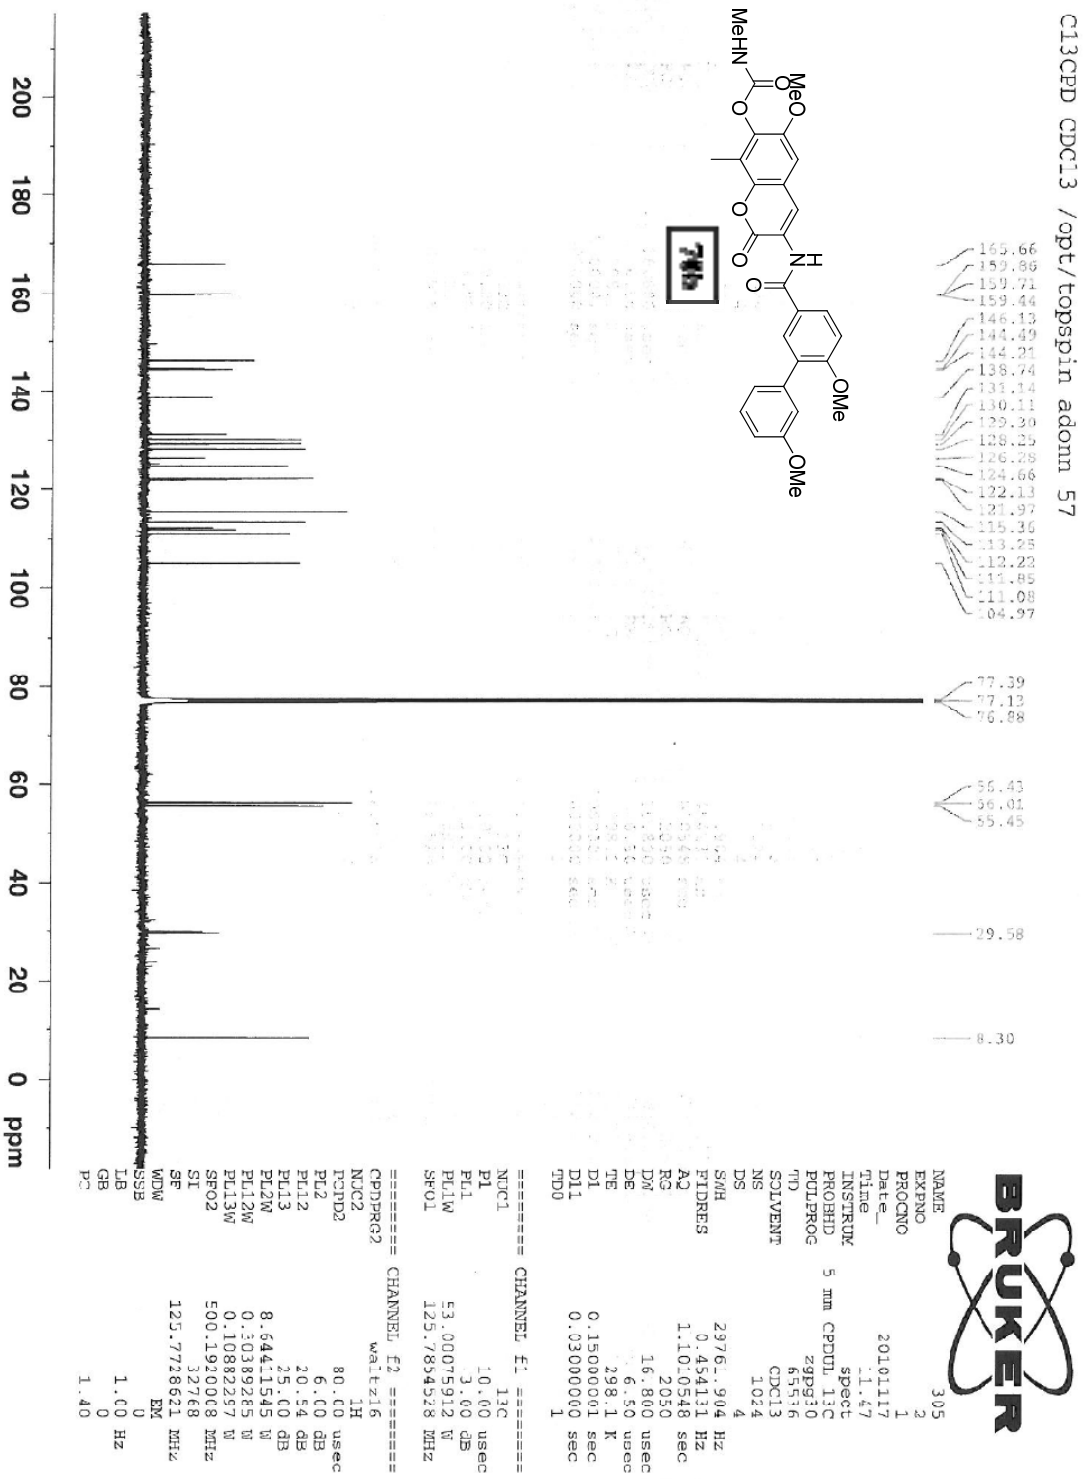



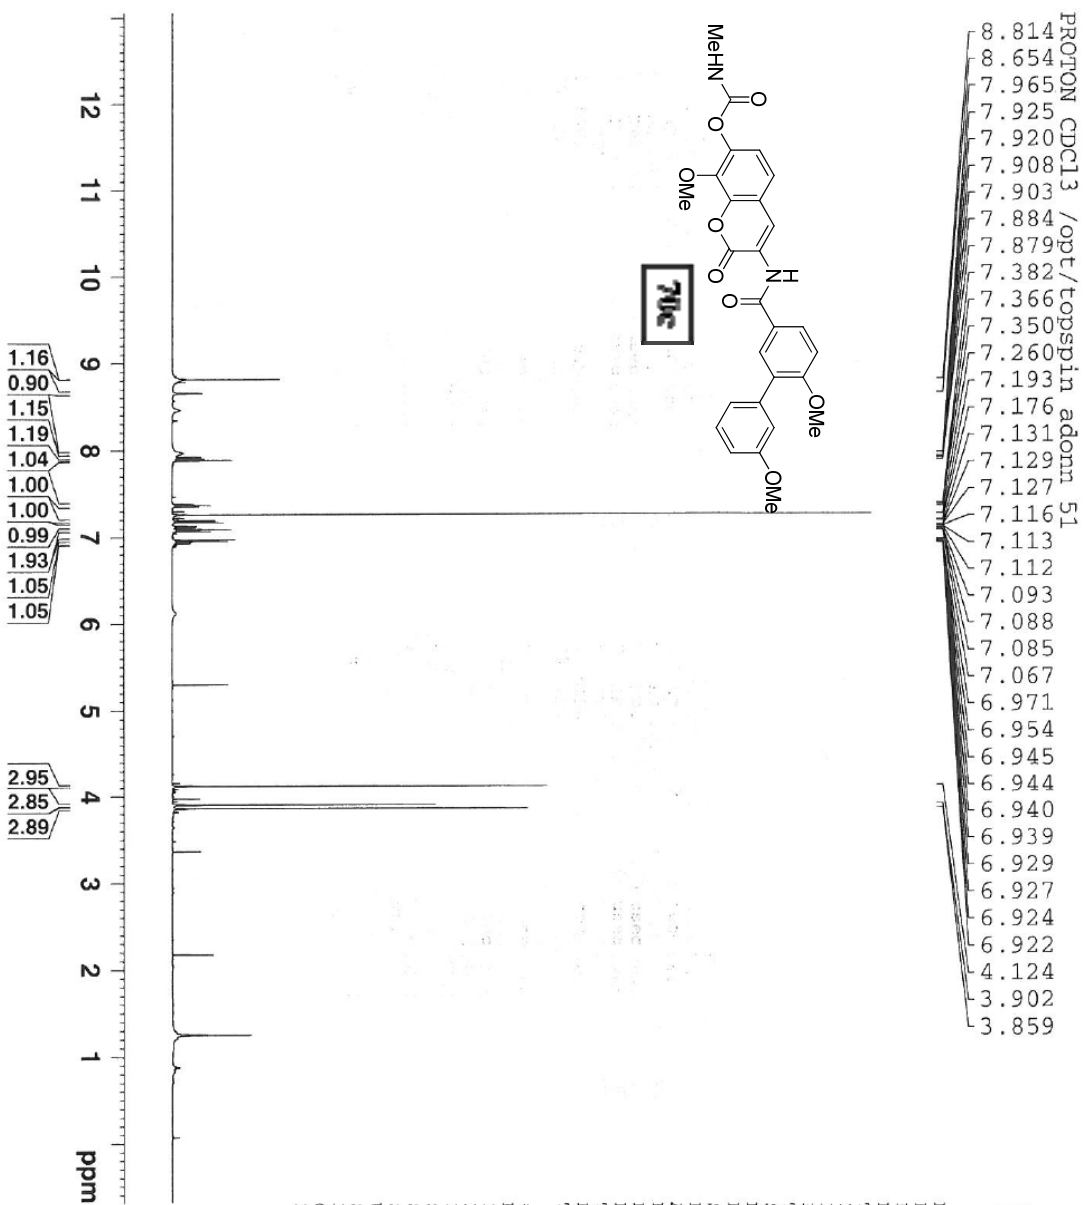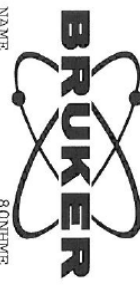

```

NAME 80NHMR
EXPNO 1
PROCNO 1
Date_ 20090319
Time 18.36
INSTRUM spect
PROBHD 5 mm CPDUL 13C
PULPROG zg30
TD 65536
SOLVENT CDCl3
NS 16
DS 2
SWH 10330.578 Hz
FIDRES 0.157632 Hz
AQ 3.171923 sec
RG 2050
DW 48.400 usec
DE 6.50 usec
TE 298.2 K
TD0 1.00000000 sec
===== CHANNEL f1 =====
NUC1 1H
P1 15.00 usec
PL 6.00 dB
PULPW 8.64411565 W
SF01 500.1930889 MHz
SI 32768
WDW EM
SSB 0
LB 0.30 Hz
GB 0
PC 1.00
    
```

- PROTON CDCl3 /opt/topspin adomn 51
- 8.814
  - 8.654
  - 7.965
  - 7.925
  - 7.920
  - 7.908
  - 7.903
  - 7.884
  - 7.879
  - 7.382
  - 7.366
  - 7.350
  - 7.260
  - 7.193
  - 7.176
  - 7.131
  - 7.129
  - 7.127
  - 7.116
  - 7.113
  - 7.112
  - 7.093
  - 7.088
  - 7.085
  - 7.067
  - 6.971
  - 6.954
  - 6.945
  - 6.944
  - 6.940
  - 6.939
  - 6.929
  - 6.927
  - 6.924
  - 6.922
  - 4.124
  - 3.902
  - 3.859

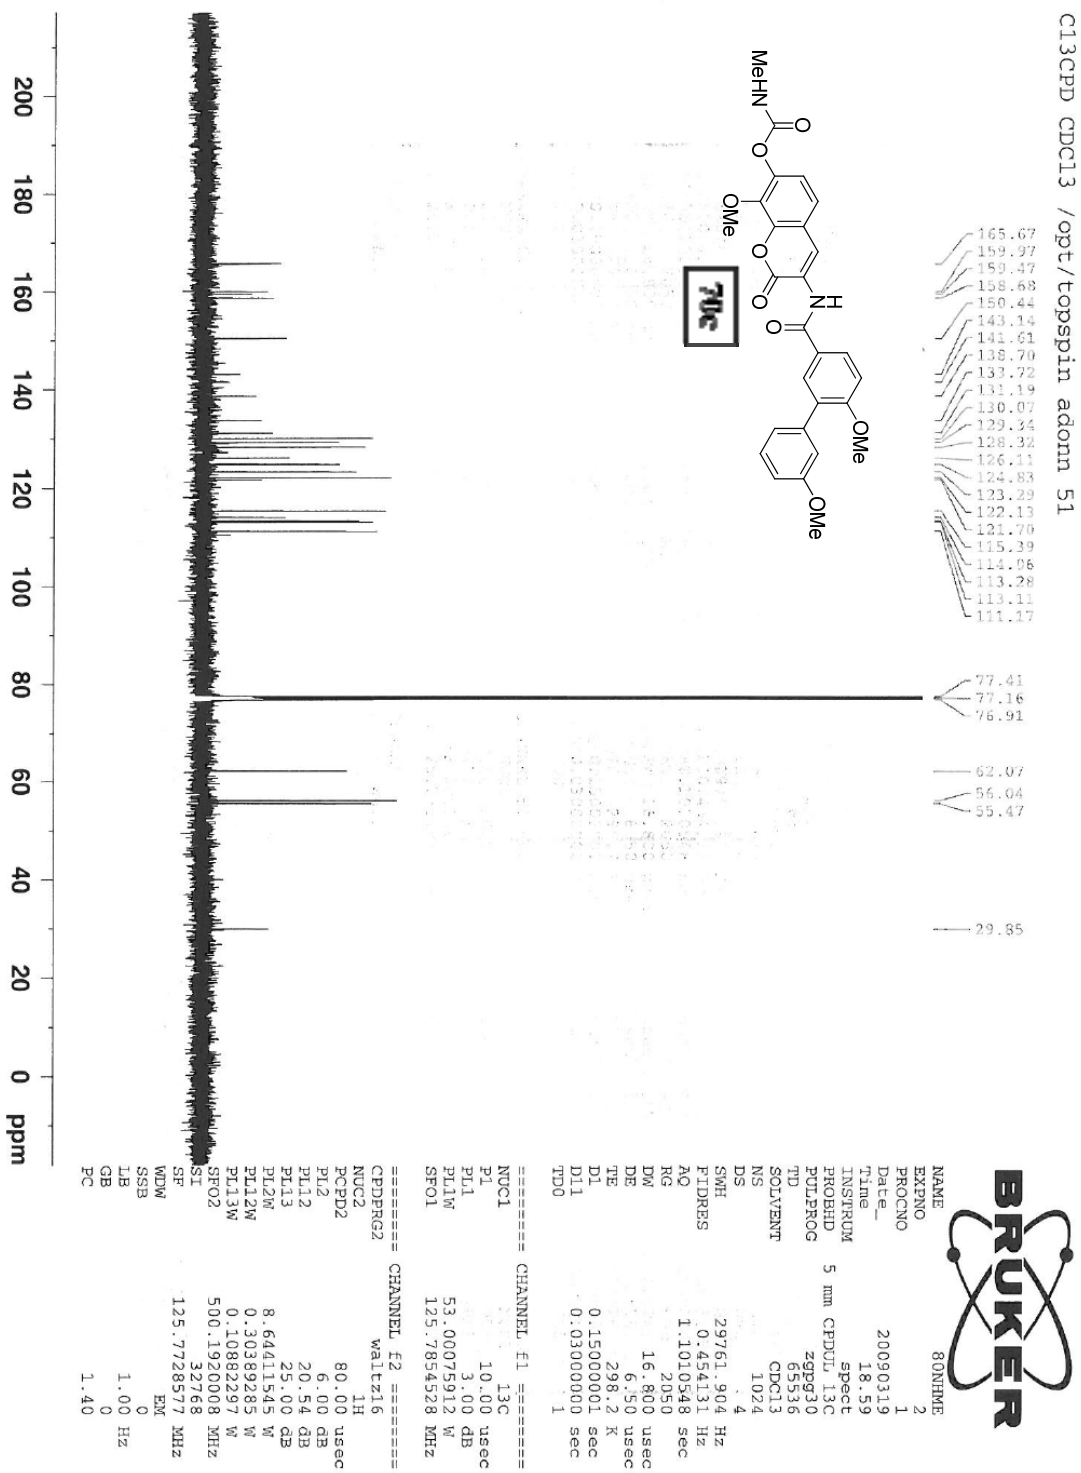

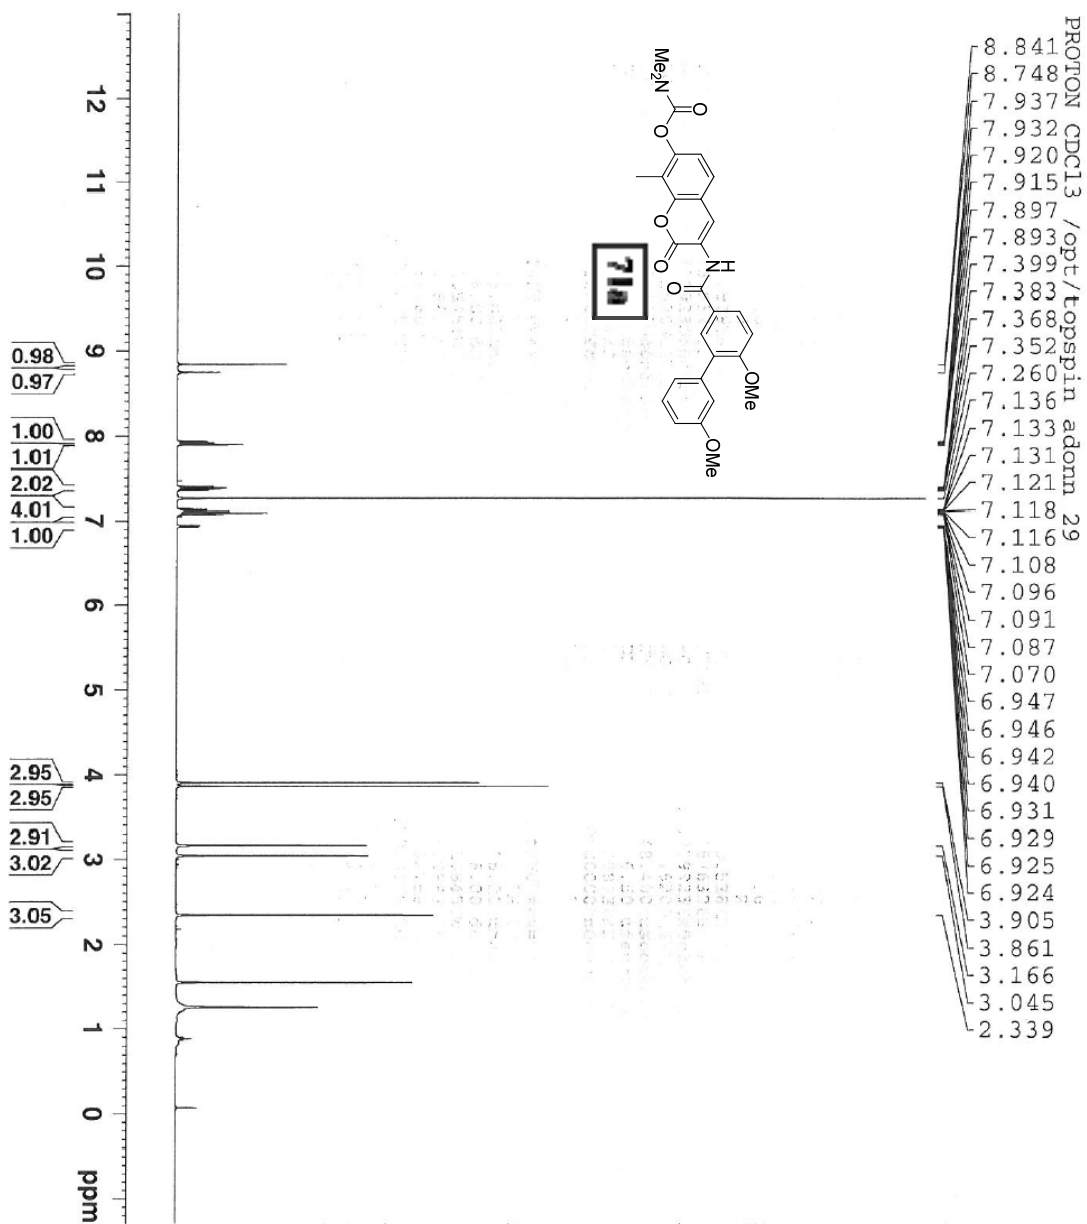

PROTON CDCl3 /opt/topspin adonn 29

|       |
|-------|
| 8.841 |
| 8.748 |
| 7.937 |
| 7.932 |
| 7.920 |
| 7.915 |
| 7.897 |
| 7.893 |
| 7.399 |
| 7.383 |
| 7.368 |
| 7.352 |
| 7.260 |
| 7.136 |
| 7.133 |
| 7.131 |
| 7.121 |
| 7.118 |
| 7.116 |
| 7.108 |
| 7.096 |
| 7.091 |
| 7.087 |
| 7.070 |
| 6.947 |
| 6.946 |
| 6.942 |
| 6.940 |
| 6.931 |
| 6.929 |
| 6.925 |
| 6.924 |
| 3.905 |
| 3.861 |
| 3.166 |
| 3.045 |
| 2.339 |

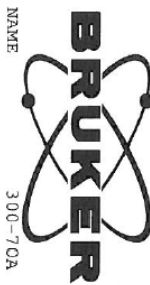

```

NAME          300-70A
EXPNO         1
PROCNO        1
Date_         20101119
Time         21.54
INSTRUM       spect
PROBHD        5 mm CPDPU1 13C
PULPROG       zg30
TD            65536
SOLVENT       CDCl3
NS            16
DS            2
SWH           10330.578 Hz
FIDRES        0.157632 Hz
AQ            3.1719923 sec
RG            1620
DM            48.400 usec
DE            6.50 usec
TE            298.2 K
D1            1.00000000 sec
TD0           1
    
```

```

===== CHANNEL f1 =====
NUC1          1H
P1            15.00 usec
PL1           6.00 dB
PL1W          8.64411545 W
SFO1          500.1930889 MHz
SI            32768
SF            500.1900118 MHz
WDW           EM
SSB           0
LB            0.30 Hz
GB            0
PC            1.00
    
```

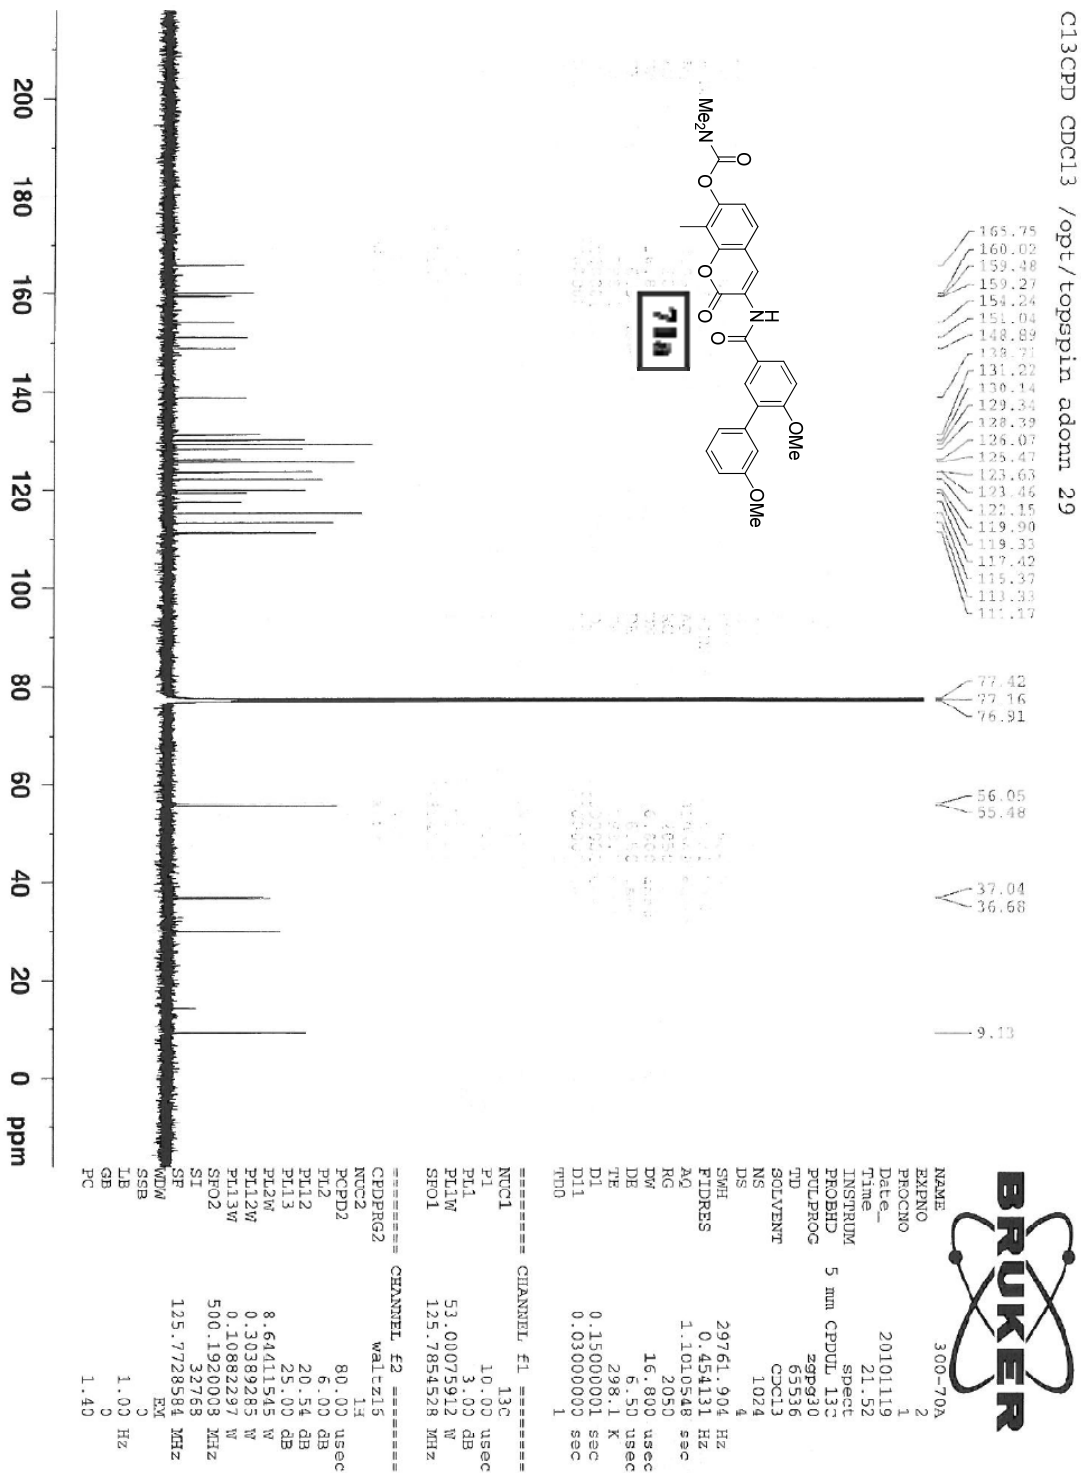

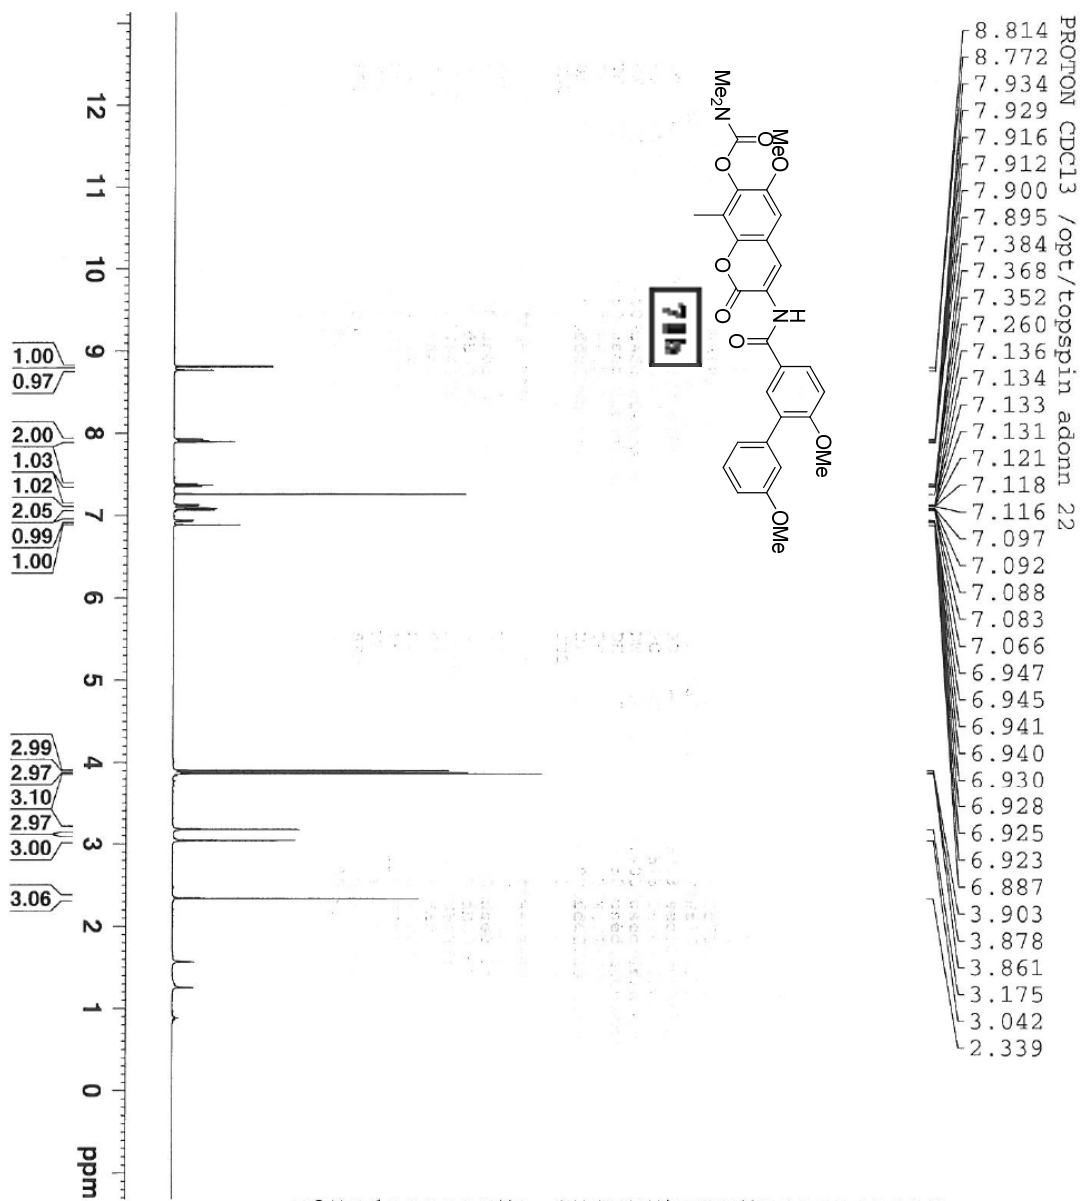

PROTON CDCl3 /opt/topspin adomn 22

|       |
|-------|
| 8.814 |
| 8.772 |
| 7.934 |
| 7.929 |
| 7.916 |
| 7.912 |
| 7.900 |
| 7.895 |
| 7.384 |
| 7.368 |
| 7.352 |
| 7.260 |
| 7.136 |
| 7.134 |
| 7.133 |
| 7.121 |
| 7.118 |
| 7.116 |
| 7.097 |
| 7.092 |
| 7.088 |
| 7.083 |
| 7.066 |
| 6.947 |
| 6.945 |
| 6.941 |
| 6.940 |
| 6.930 |
| 6.928 |
| 6.925 |
| 6.923 |
| 6.887 |
| 3.903 |
| 3.878 |
| 3.861 |
| 3.175 |
| 3.042 |
| 2.339 |

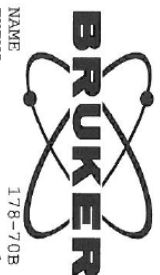

```

NAME 178-70B
EXPNO 1
PROCNO 1
Date_ 20101118
Time 21.39
INSTRUM spect
PROBHD 5 mm CPDUL13C
PULPROG zg30
TD 65536
SOLVENT CDCl3
NS 16
DS 2
SWH 10330.578 Hz
FIDRES 0.157632 Hz
AQ 3.171923 sec
RG 575
DE 48.400 usec
TE 298.2 K
D1 1.00000000 sec
TD0 1

===== CHANNEL f1 =====
NUC1 1H
P1 15.00 usec
PL1 6.00 dB
PL1W 8.64411545 W
SFO1 500.1930889 MHz
SI 32768
SF 500.1900116 MHz
WDW EM
SSB 0
LB 0.30 Hz
GB 0
PC 1.00
    
```

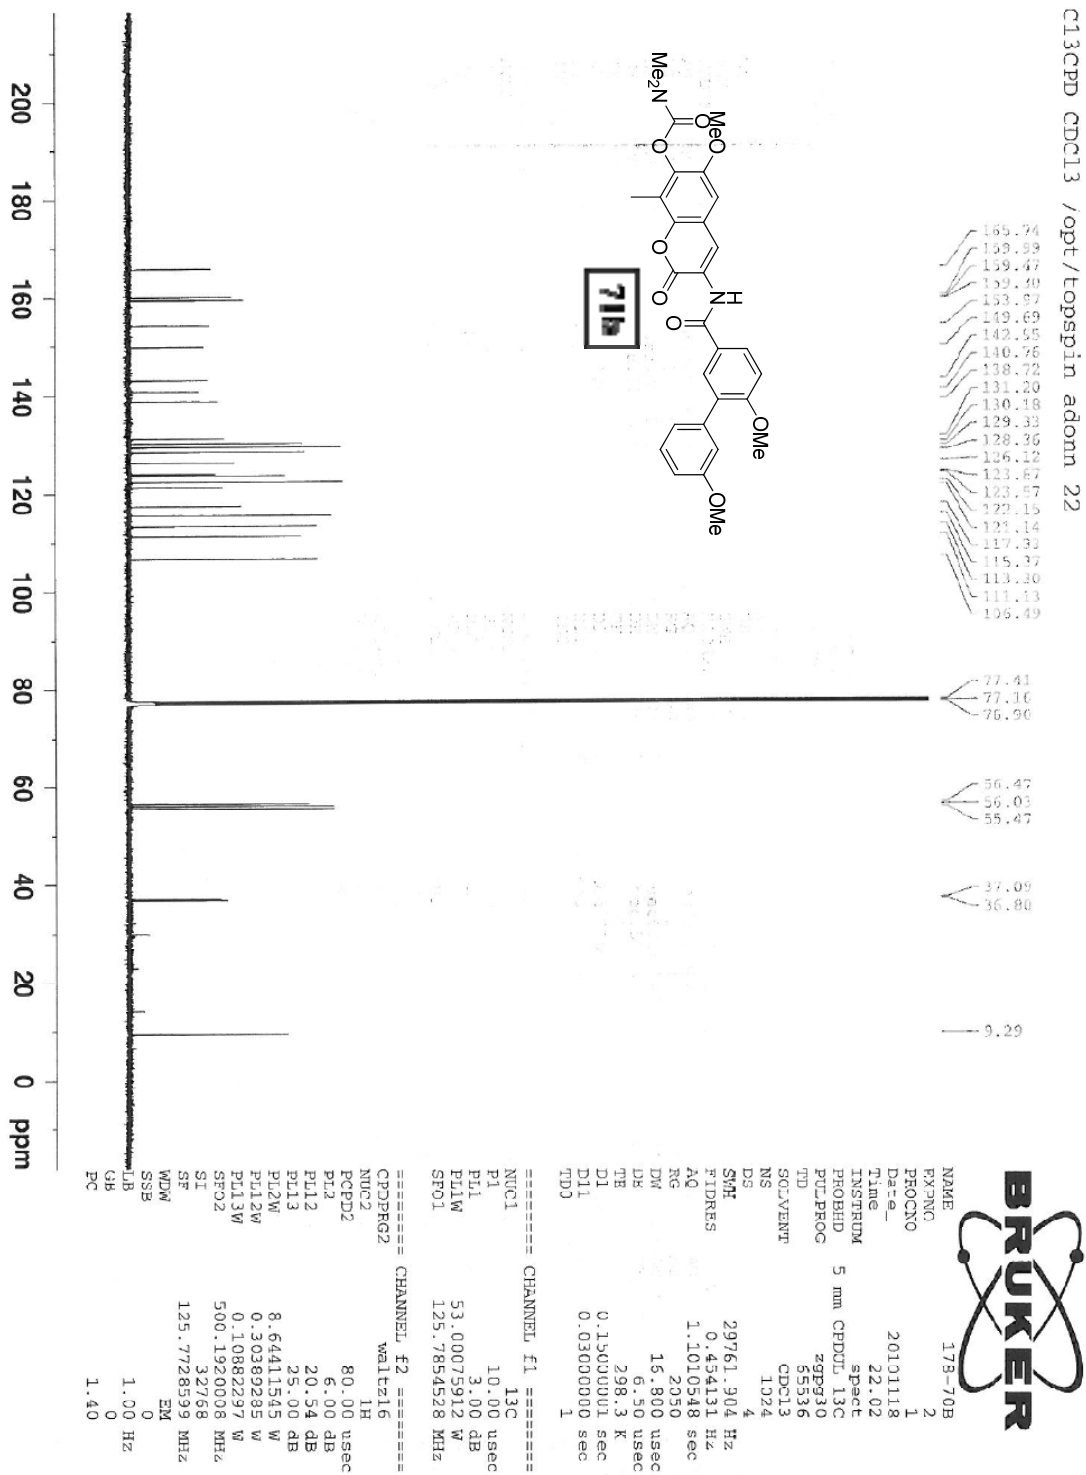

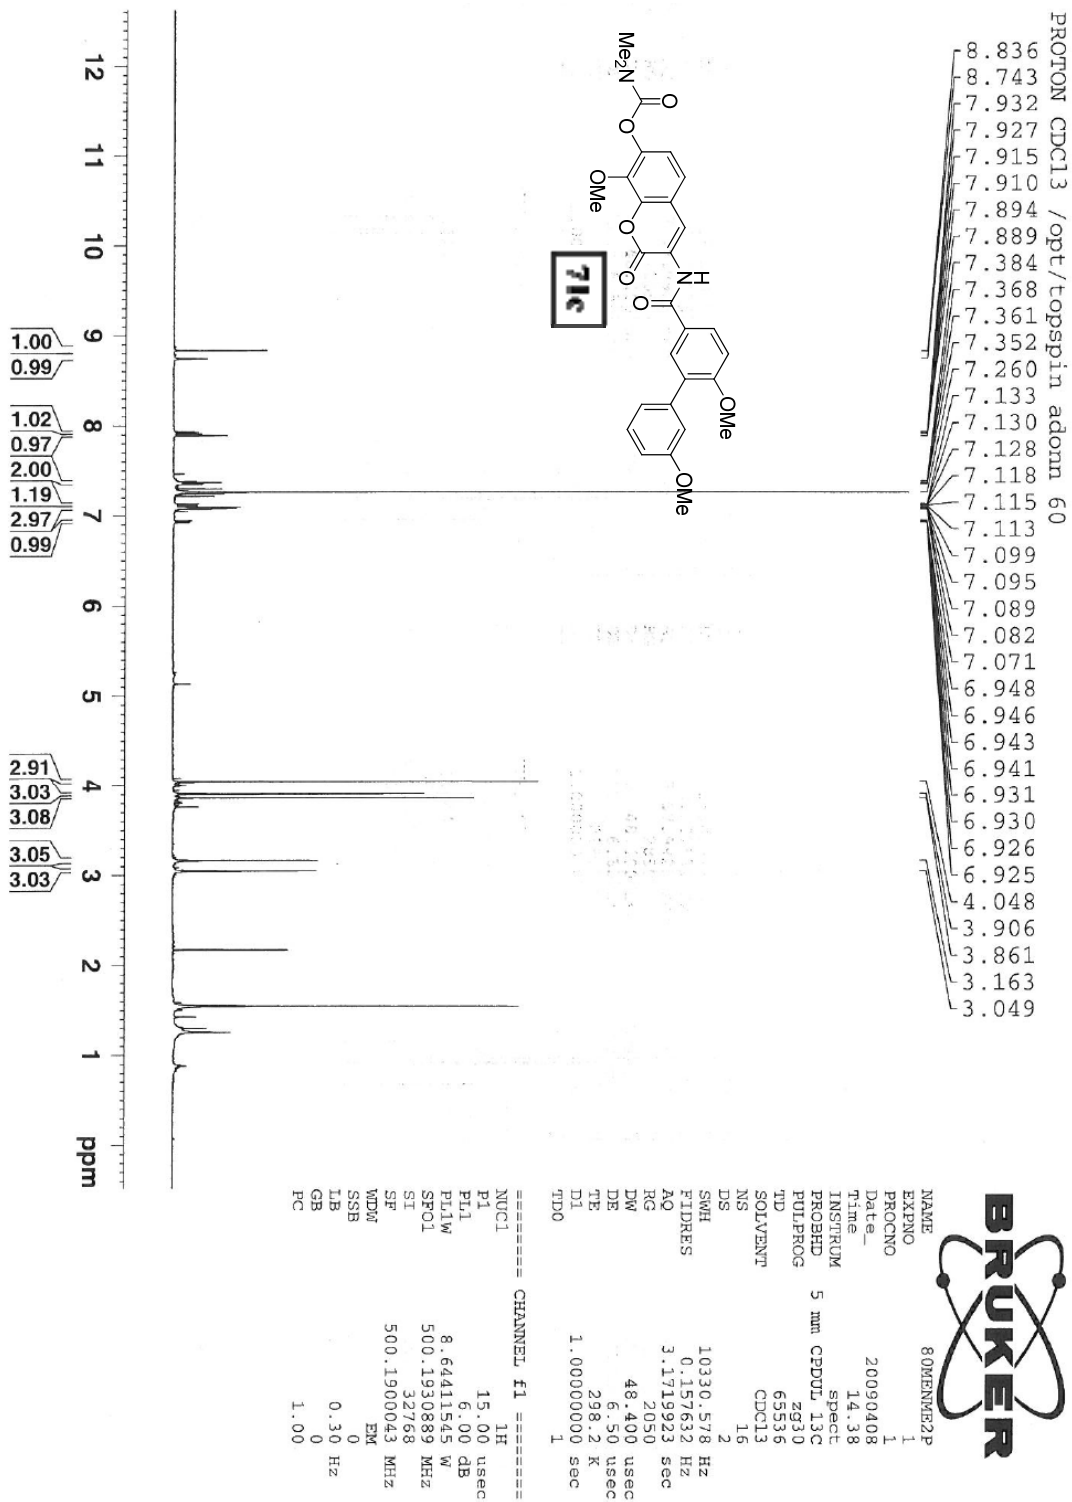

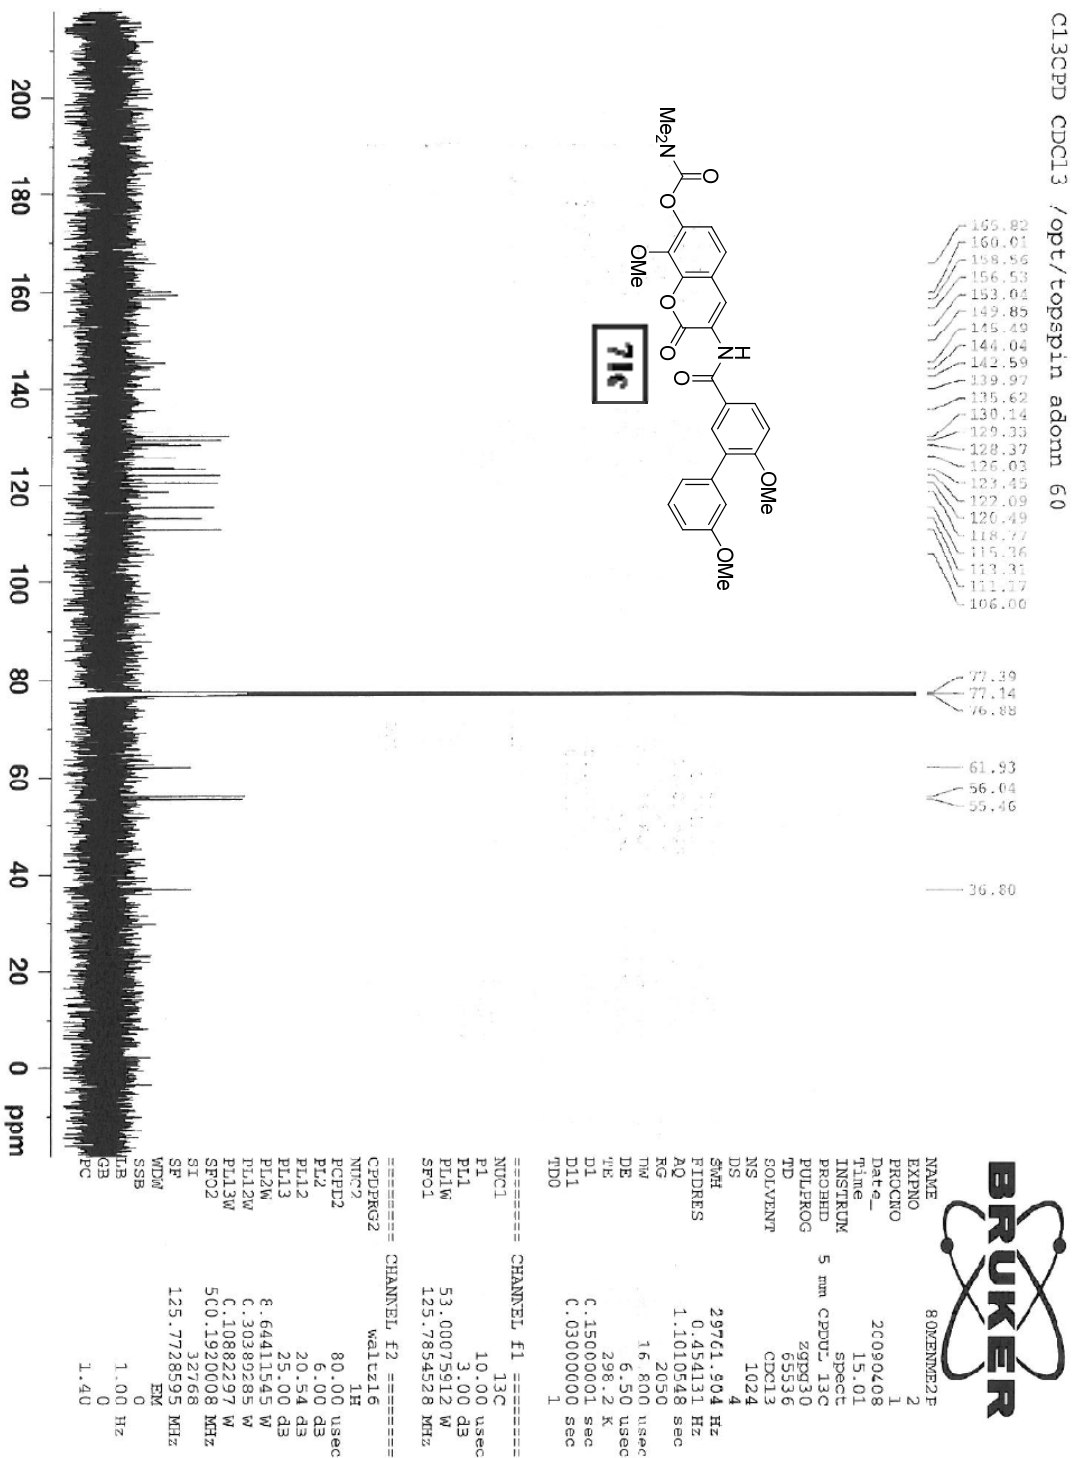



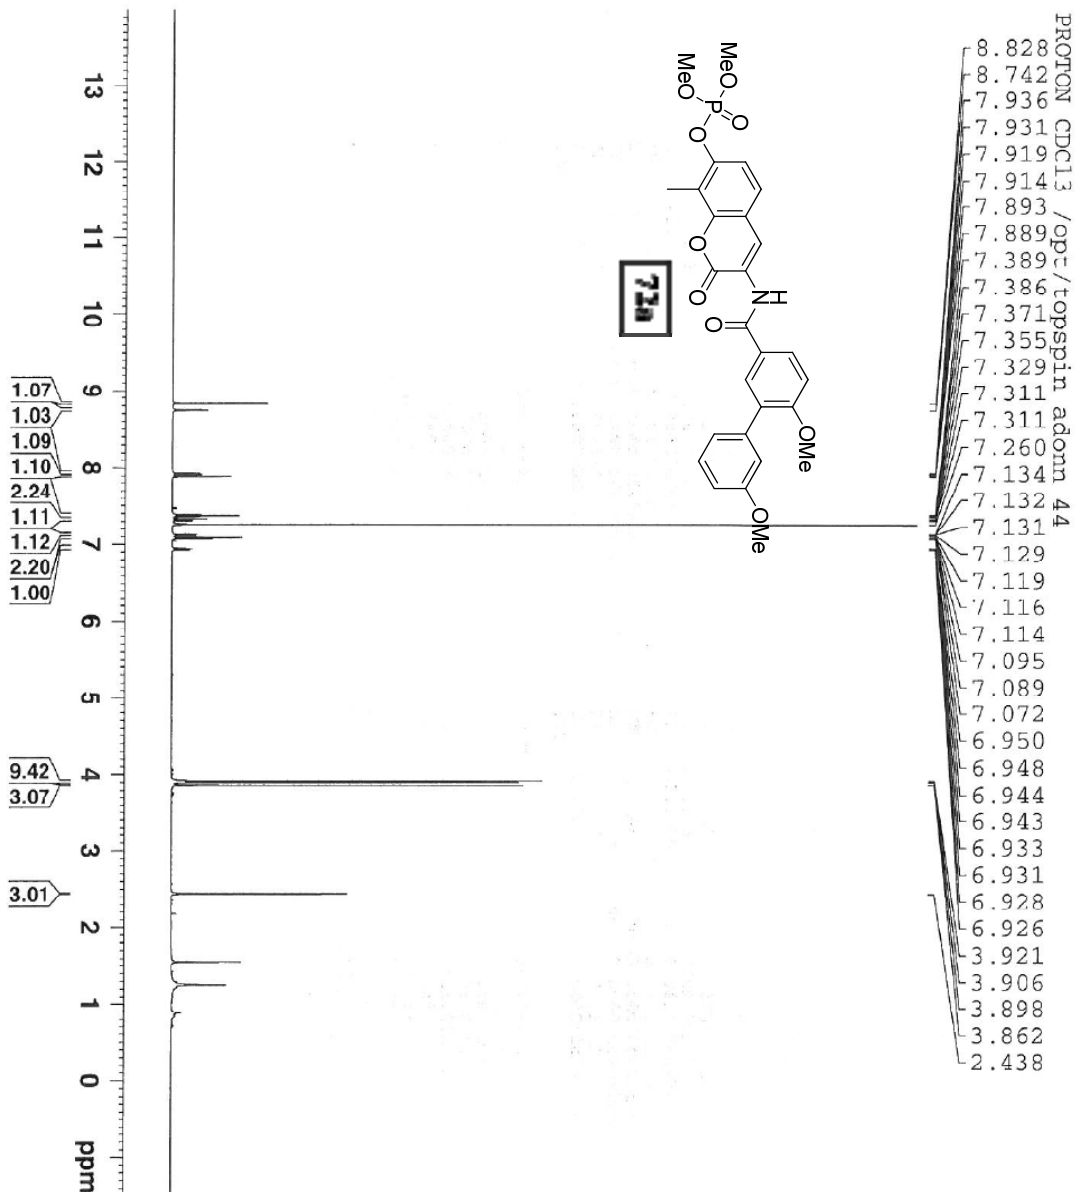

**BRUKER**

NAME KJ301  
 EXPNO 1  
 PROCNO 1  
 Date\_ 20100420  
 Time 23.25  
 INSTRUM spect  
 PROBHD 5 mm CPDUL-13C  
 PULPROG zg30  
 ID 65336  
 SOLVENT CDCl<sub>3</sub>  
 NS 16  
 DS 2  
 SWH 10330.578 Hz  
 FIDRES 0.157632 Hz  
 AQ 3.1719923 sec  
 RG 2050  
 DW 48.400 usec  
 DE 6.50 usec  
 TE 298.2 K  
 D1 1.00000000 sec  
 TD 1

==== CHANNEL f1 =====  
 NUC1 <sup>1</sup>H  
 P1 15.00 usec  
 PL 6.00 dB  
 P1W 8.64411545 V  
 SF01 500.1930889 MHz  
 SI 32768  
 SE 500.1900056 MHz  
 WDW EM  
 SSB 0  
 LB 0.30 Hz  
 GB 0  
 PC 1.00

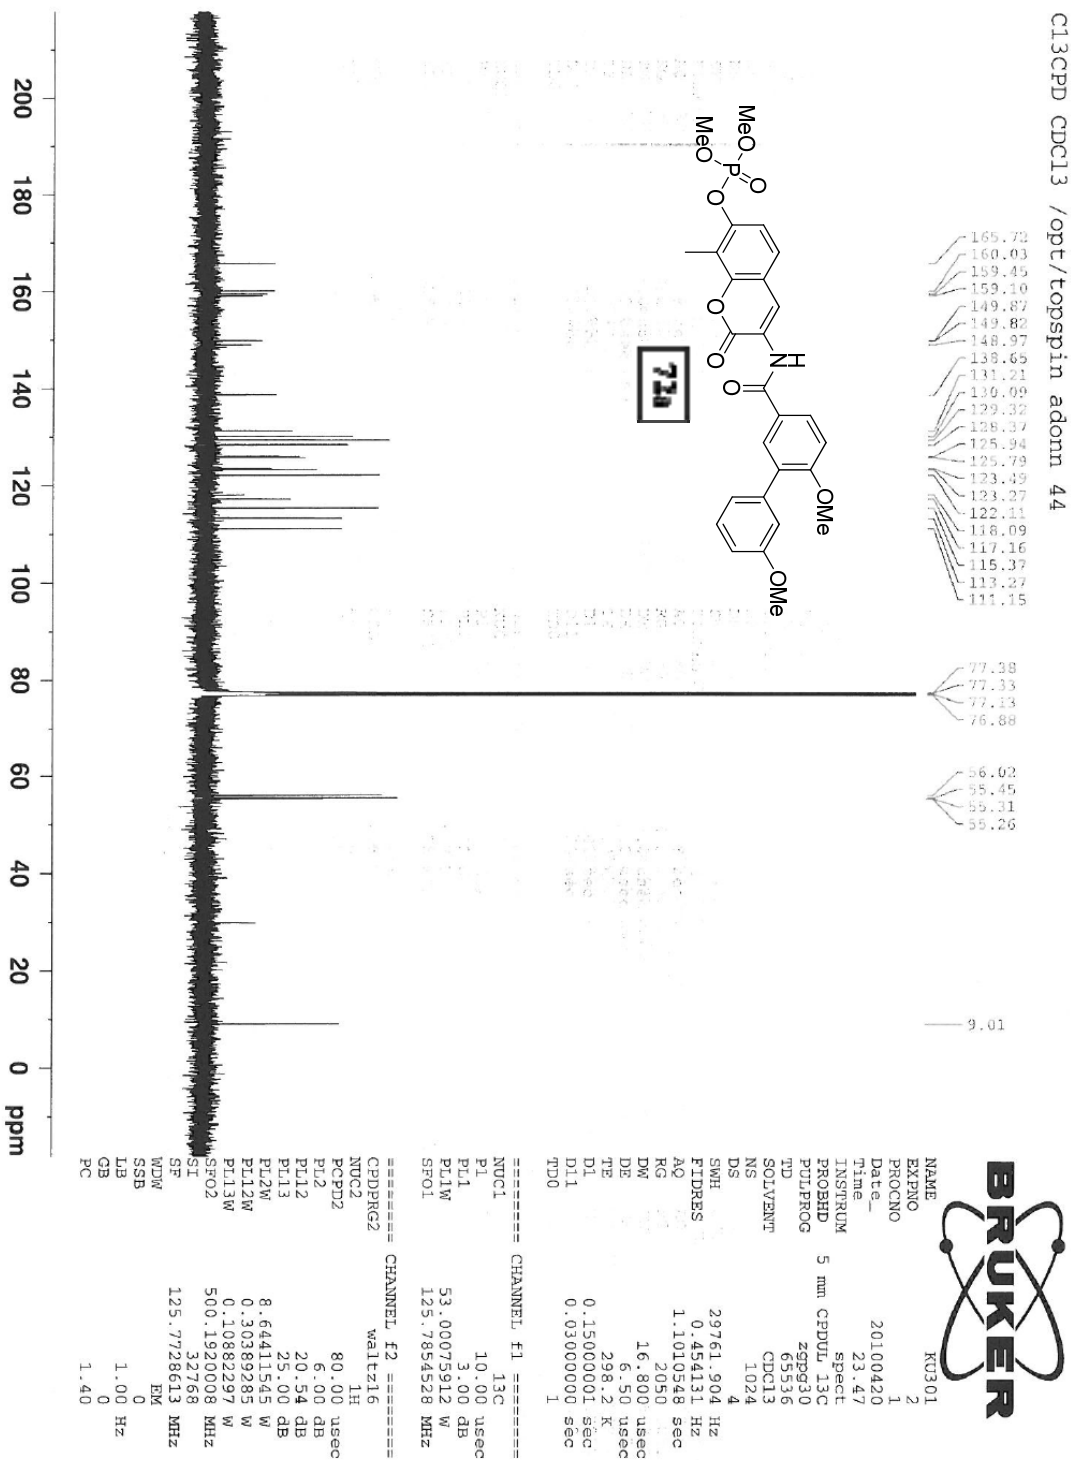

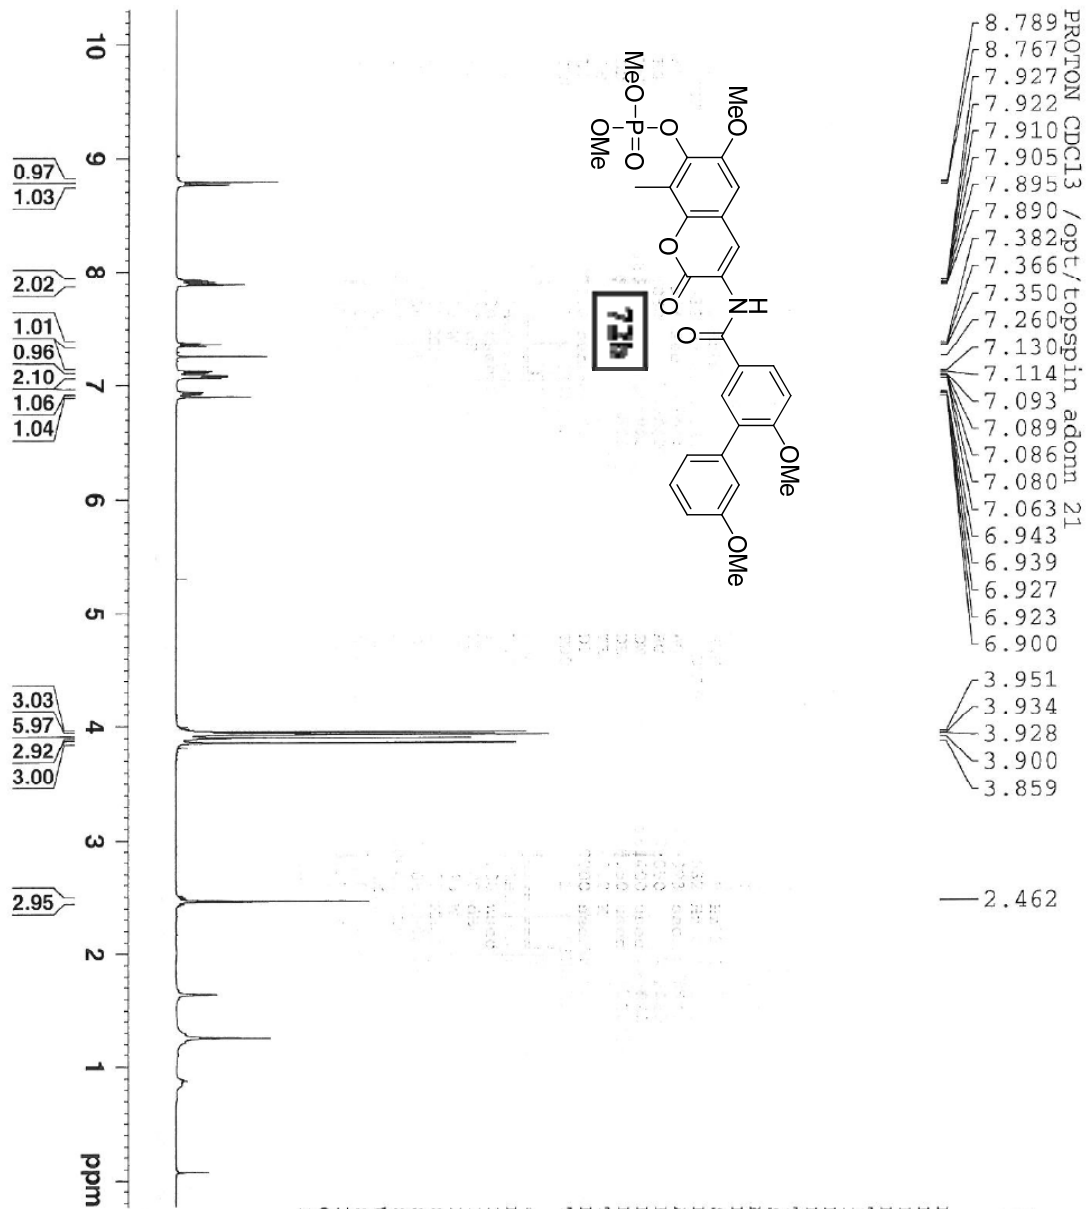

PROTON CDCl3 /opt/topspin adomn 21

|       |
|-------|
| 8.789 |
| 8.767 |
| 7.927 |
| 7.922 |
| 7.910 |
| 7.905 |
| 7.895 |
| 7.890 |
| 7.382 |
| 7.366 |
| 7.350 |
| 7.260 |
| 7.130 |
| 7.114 |
| 7.093 |
| 7.089 |
| 7.086 |
| 7.080 |
| 7.063 |
| 6.943 |
| 6.939 |
| 6.927 |
| 6.923 |
| 6.900 |
| 3.951 |
| 3.934 |
| 3.928 |
| 3.900 |
| 3.859 |
| 2.462 |

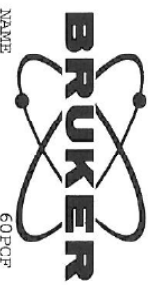

```

NAME 60PCR
EXPNO 1
PROCNO 1
Date_ 20090501
Time 6.45
INSTRUM spect
PROBHD 5 mm CPDUL 13C
PULPROG zg30
TD 65536
SOLVENT CDCl3
NS 16
DS 2
SWH 10330.578 Hz
FIDRES 0.157632 Hz
AQ 3.1719923 sec
RG 2050
DW 48.400 usec
DE 6.50 usec
TE 298.2 K
D1 1.00000000 sec
TD0 1

===== CHANNEL f1 =====
NUC1 1H
P1 15.00 usec
PL1 6.00 dB
PL1W 8.64411545 W
SFO1 500.1930889 MHz
SI 32768
SF 500.1900040 MHz
WDW EM
SSB 0
LB 0.30 Hz
GB 0
PC 1.00
    
```

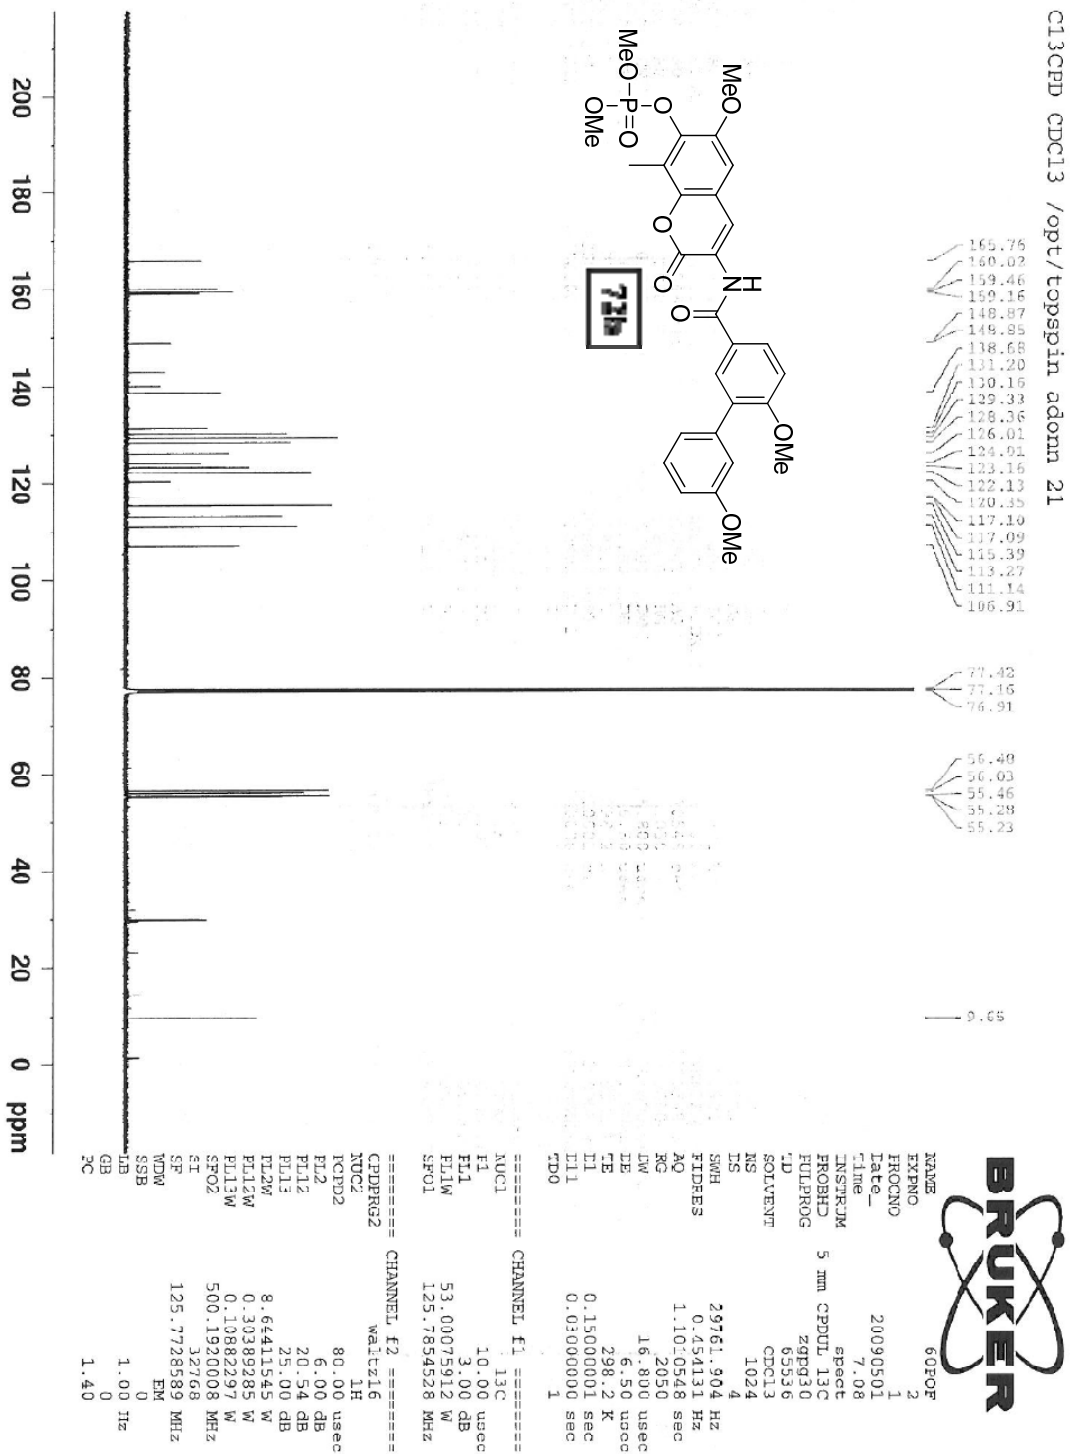

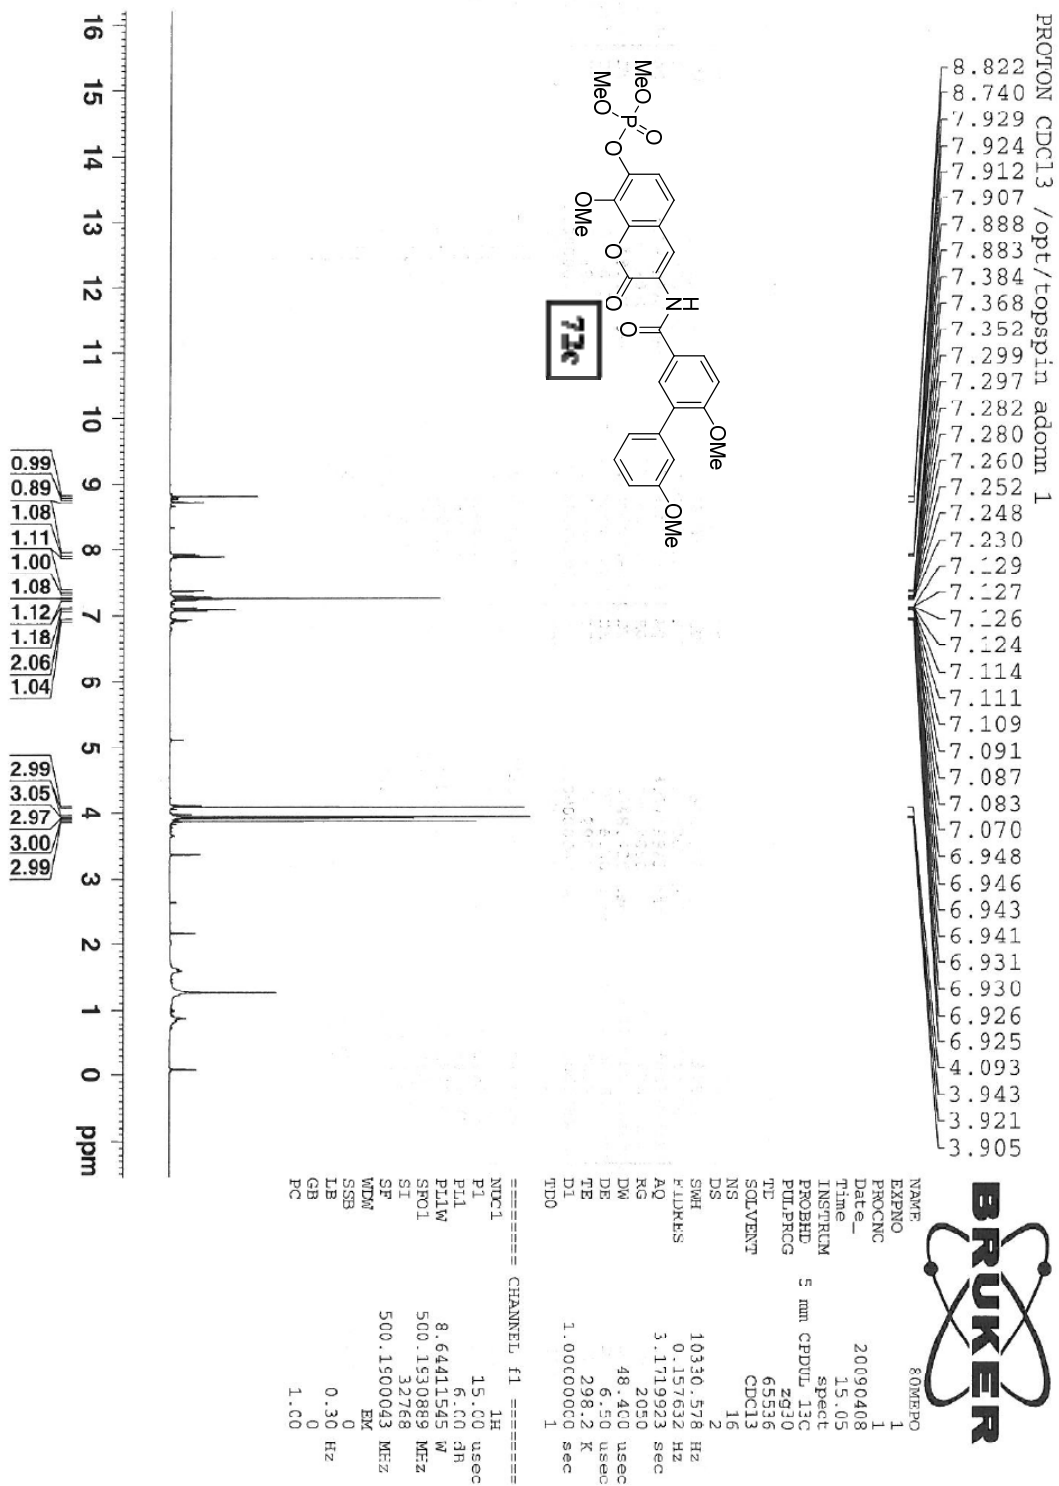

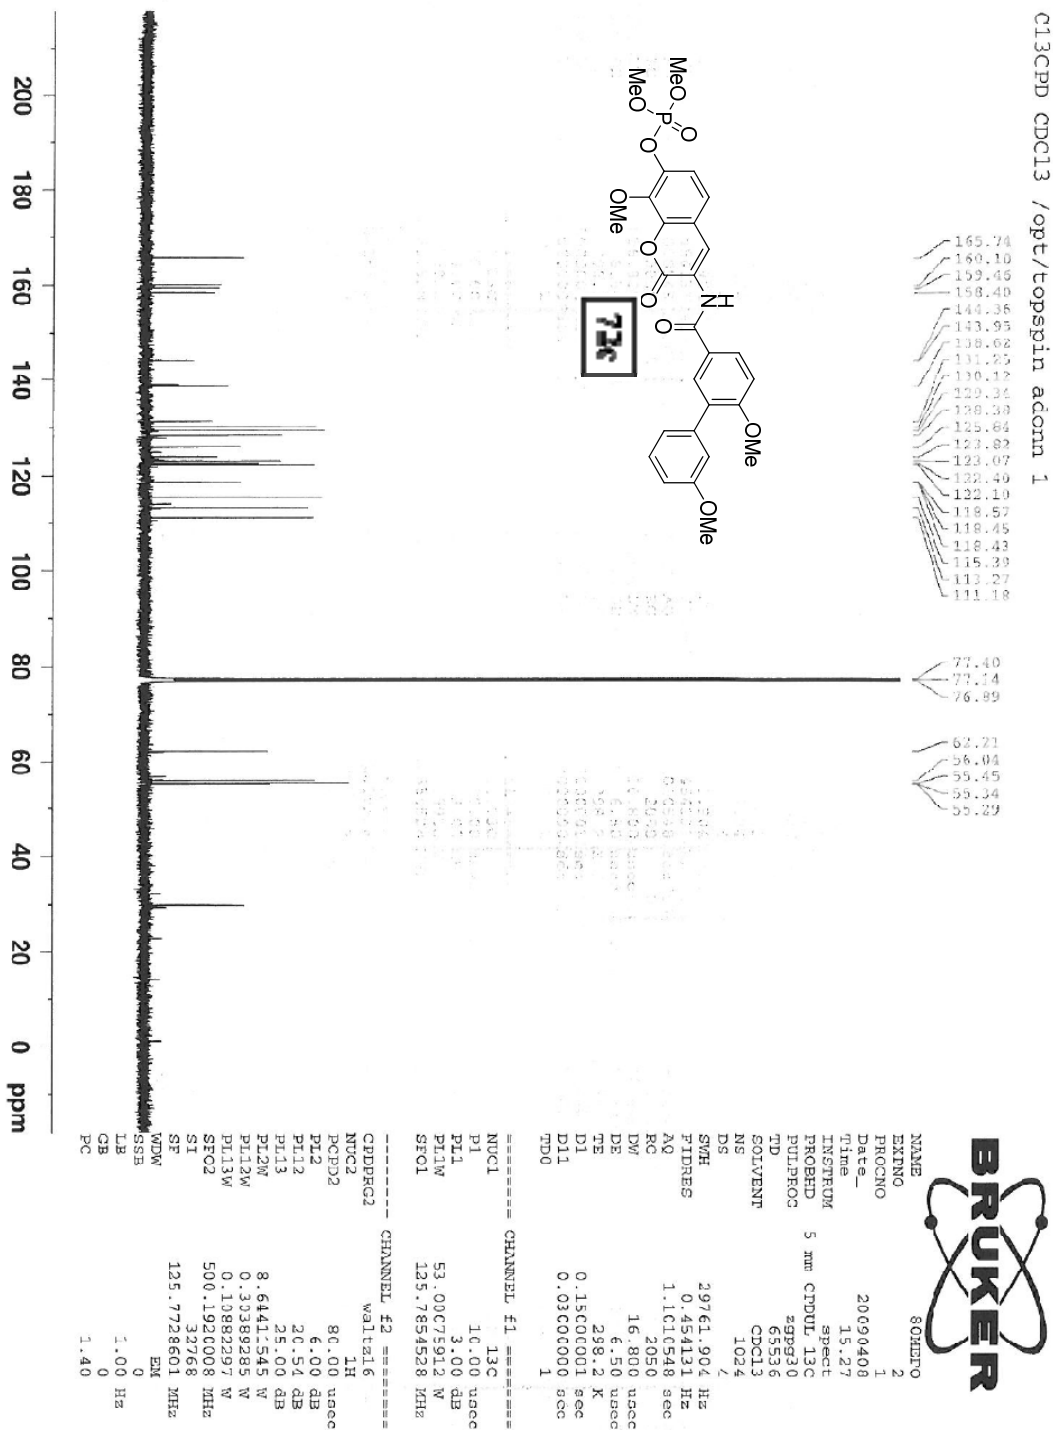

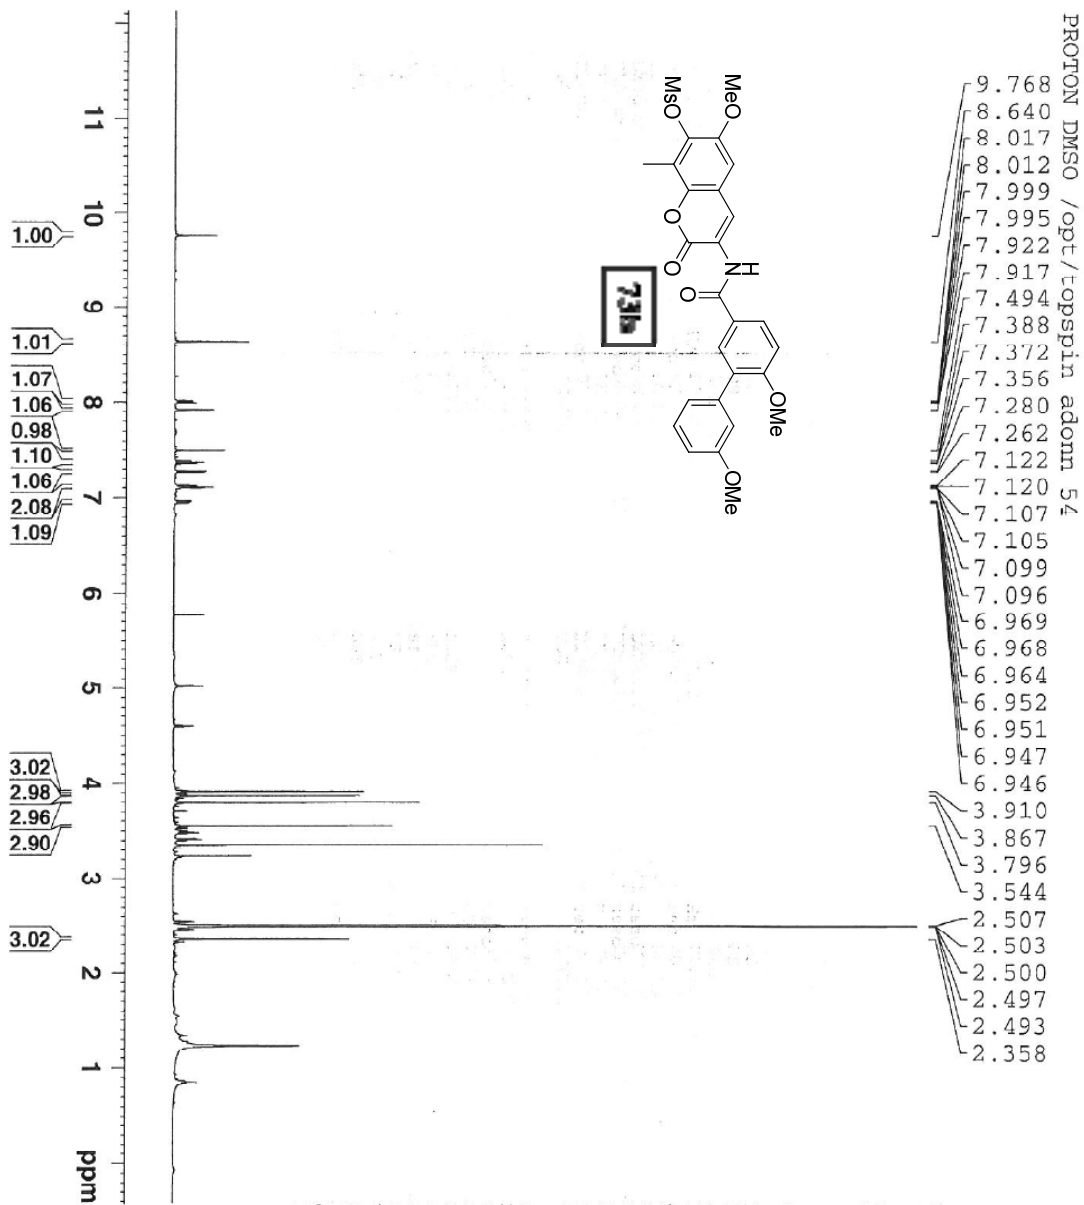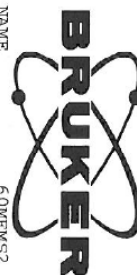

```

NAME 60WEM52
EXPNO 1
PROCNO 1
Date_ 20090313
Time 14.25
INSTRUM spect
PROBHD 5 mm CPDUL 13C
PULPROG zg30
TD 65536
SOLVENT DMSO
NS 16
DS 2
SWH 10330.578 Hz
FIDRES 0.157632 Hz
AQ 3.171923 sec
RG 2050
DM 48.400 usec
DE 6.50 usec
TE 292.0 K
D1 1.00000000 sec
TD0 1

===== CHANNEL f1 =====
NUC1 1H
P1 15.00 usec
PL 0
PL1W 5.00 dB
SFO1 500.130889 MHz
SI 32768
SF 500.1899995 MHz
WDW EM
SSB 0
LB 0.30 Hz
G3 0
PC 1.00
    
```

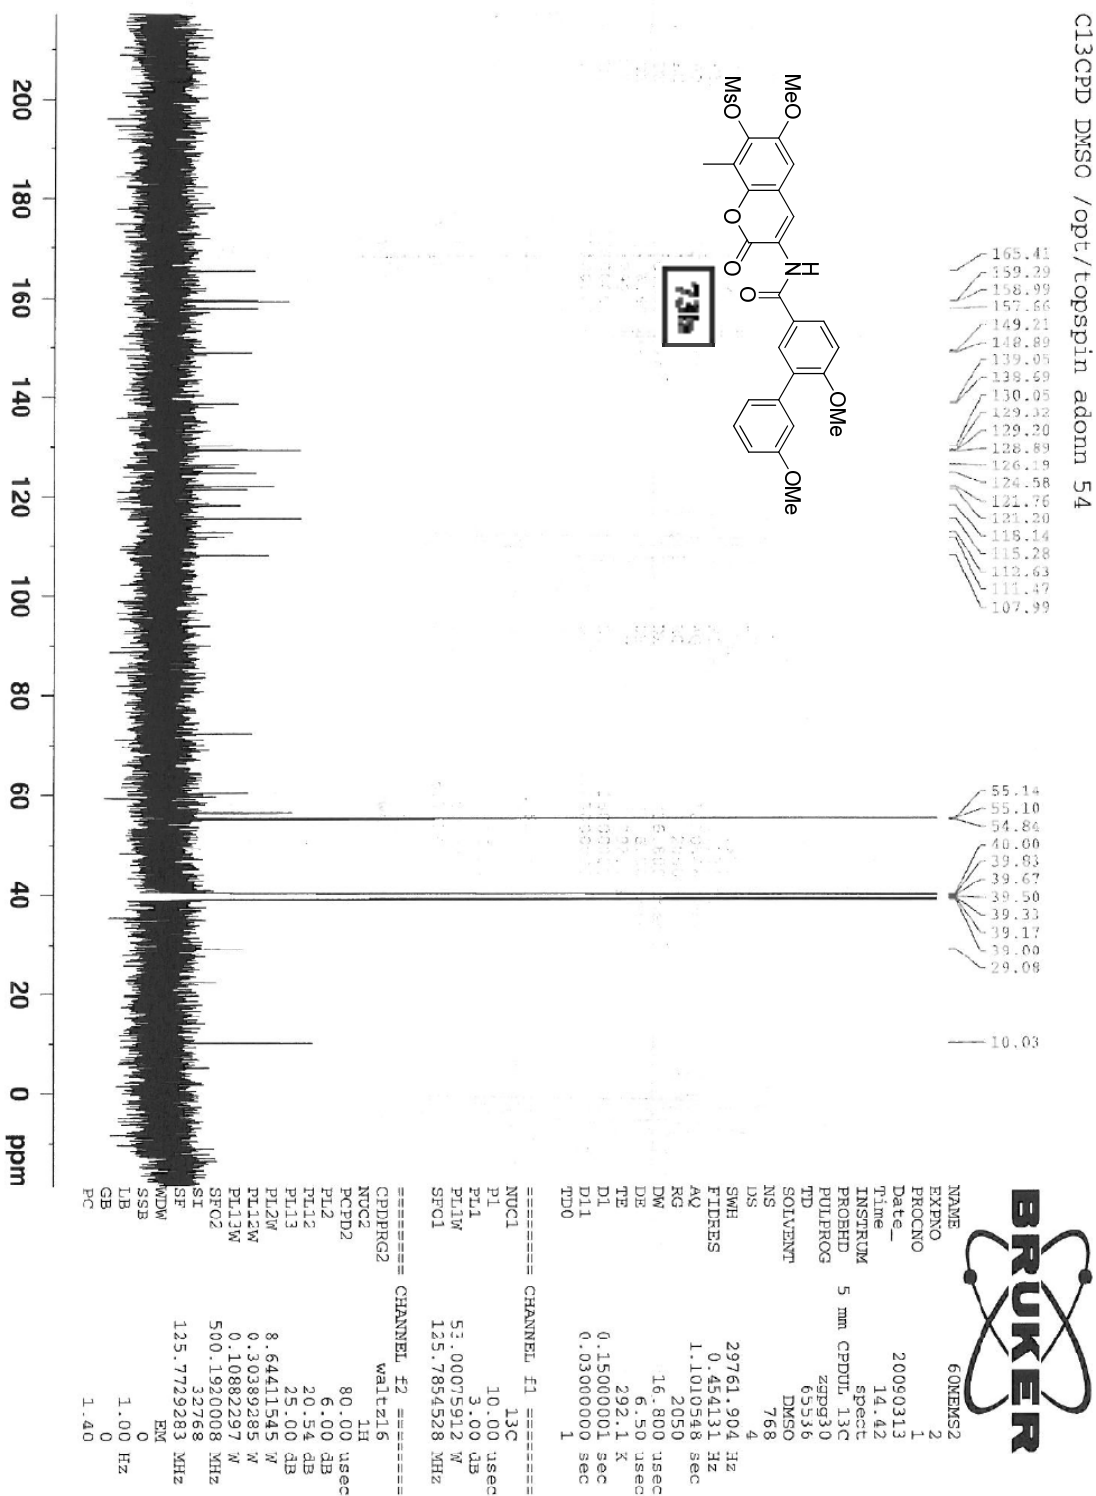



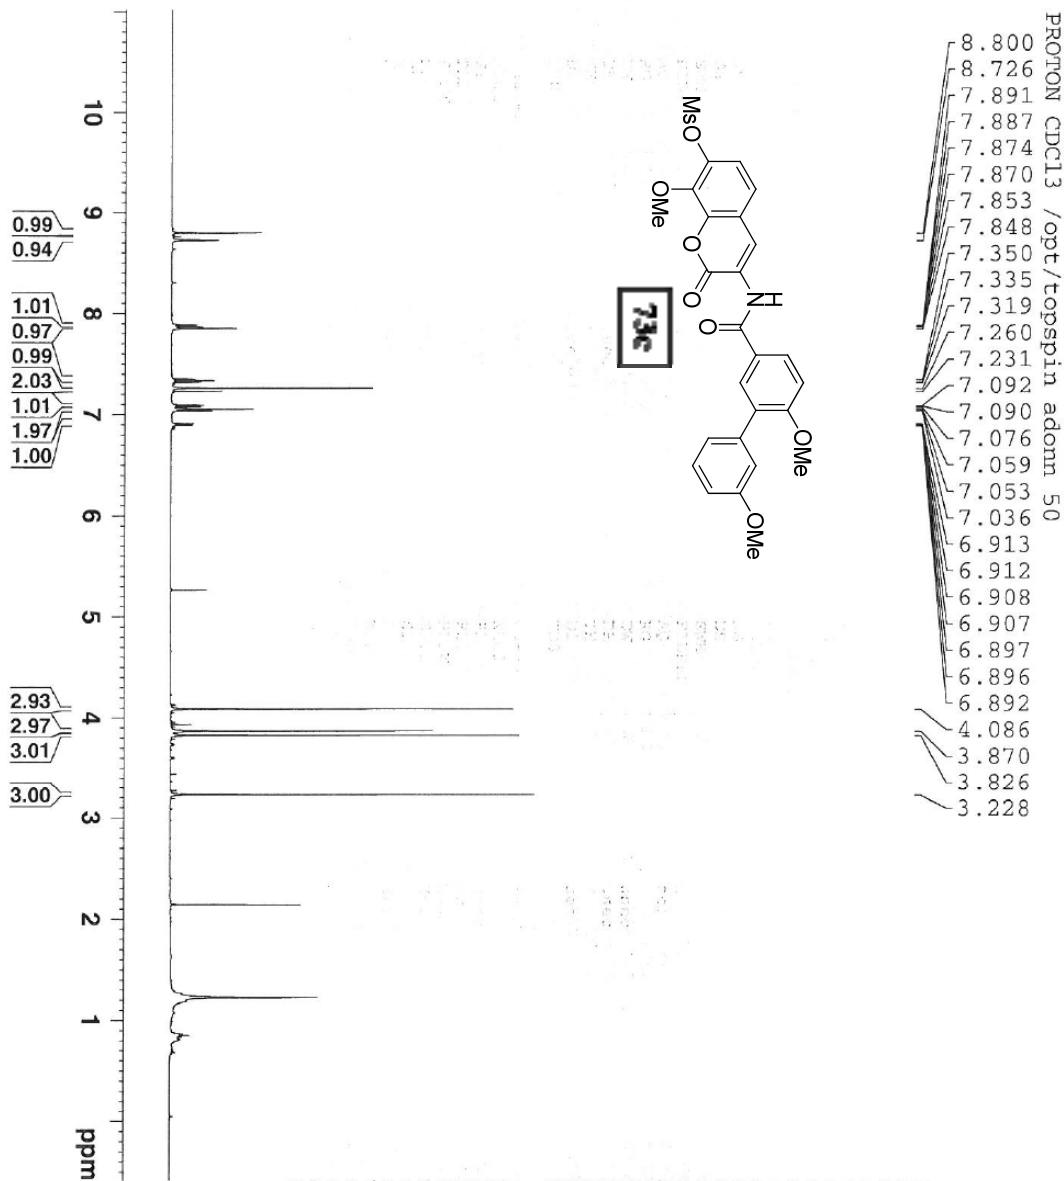

PROTON CDCl3 /opt/topspin adom 50

|       |
|-------|
| 8.800 |
| 8.726 |
| 7.891 |
| 7.887 |
| 7.874 |
| 7.870 |
| 7.853 |
| 7.848 |
| 7.350 |
| 7.335 |
| 7.319 |
| 7.260 |
| 7.231 |
| 7.092 |
| 7.090 |
| 7.076 |
| 7.059 |
| 7.053 |
| 7.036 |
| 6.913 |
| 6.912 |
| 6.908 |
| 6.907 |
| 6.897 |
| 6.896 |
| 6.892 |
| 4.086 |
| 3.870 |
| 3.826 |
| 3.228 |

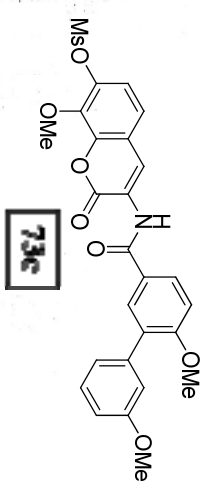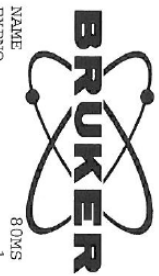

```

NAME 80MS
EXPNO 1
PROCNO 1
Date_ 20090319
Time 18.09
INSTRUM spect
PROBHD 5 mm CPDUL 13C
PULPROG zg30
TD 65536
SOLVENT CDCl3
NS 16
DS 2
SWH 10330.578 Hz
FIDRES 0.157632 Hz
AQ 3.171923 sec
RG 1030
DE 48.400 usec
TE 298.2 K
D1 1.00000000 sec
TD0 1
    
```

```

===== CHANNEL f1 =====
NUC1 1H
P1 15.00 usec
PL1 6.00 dB
PI1W 8.64411545 W
SFO1 500.1930889 MHz
SI 32768
SF 500.1900185 MHz
WDW EM
SSB 0
LB 0.30 Hz
GB 0
PC 1.00
    
```

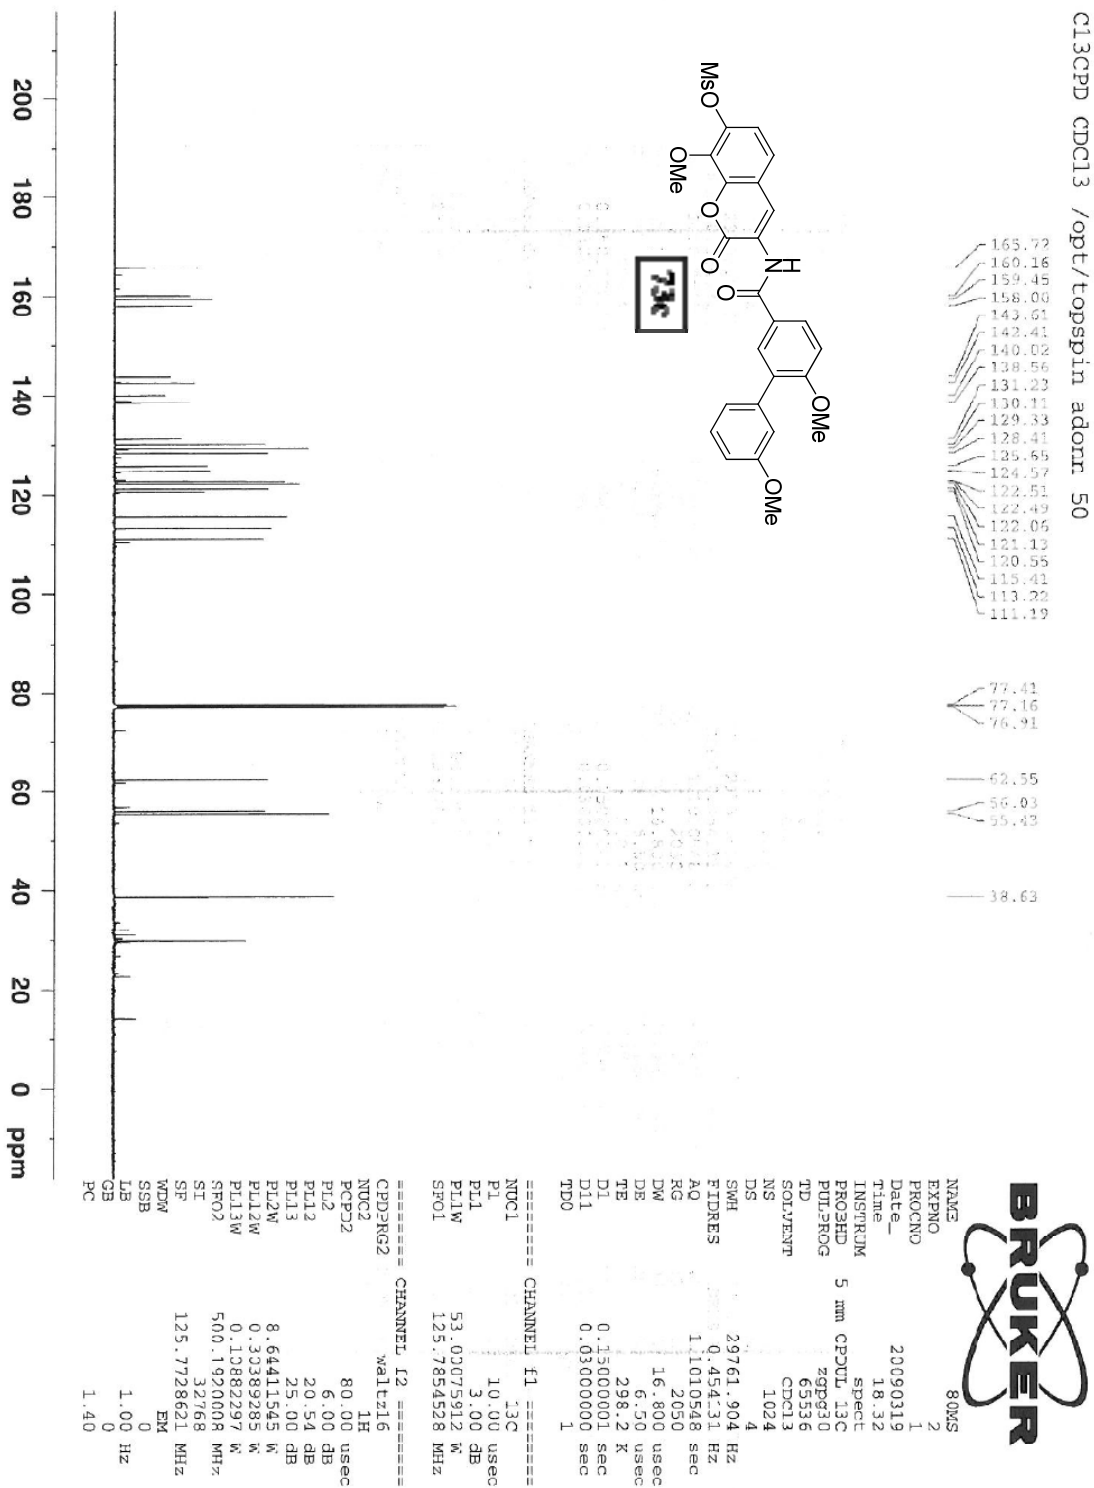

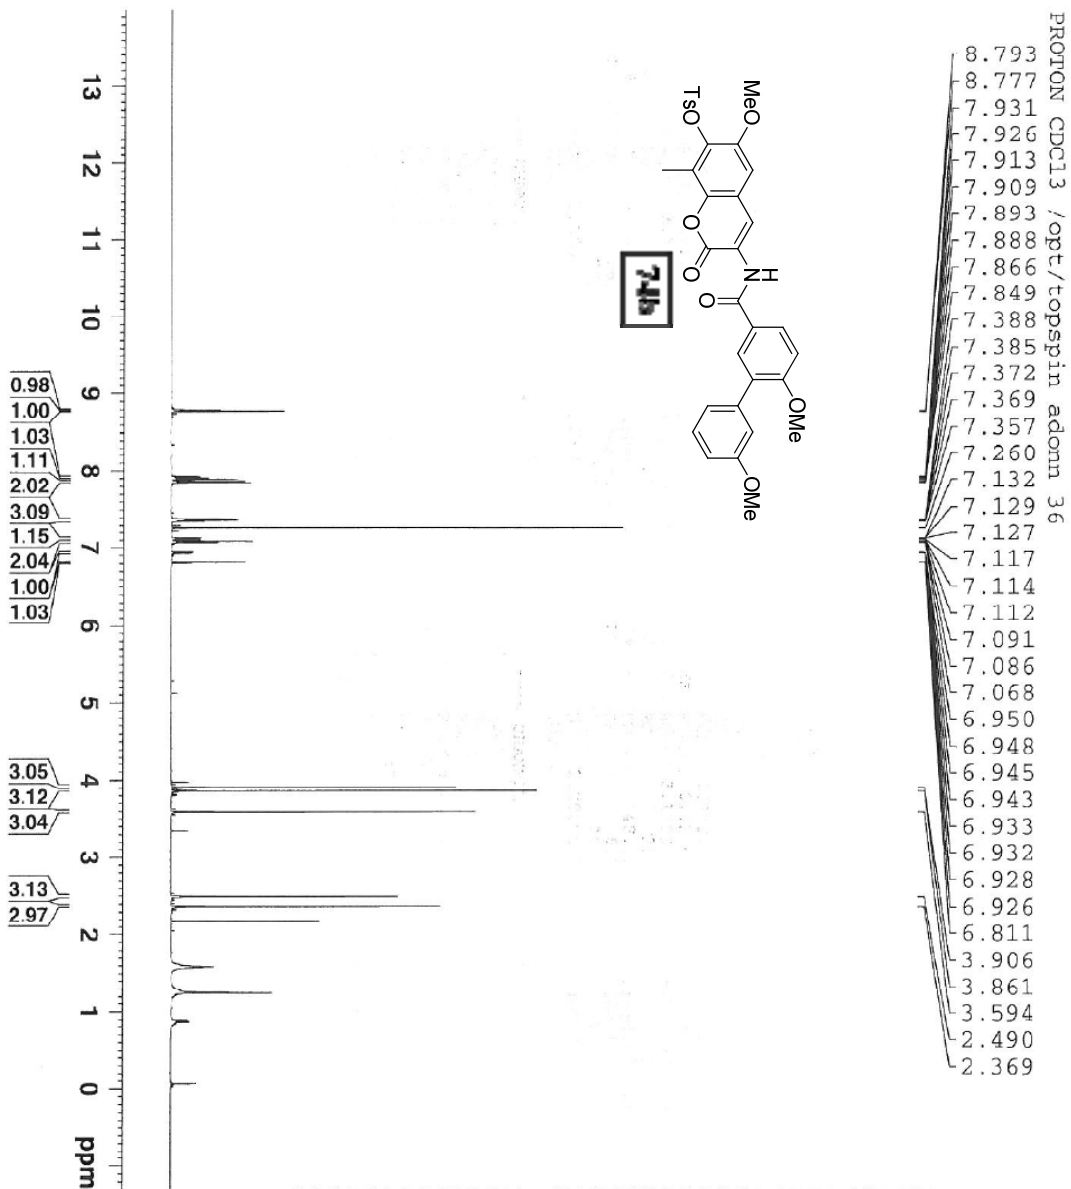

PROTON CDCl3 /opt/topspin/adomn 36

- 8.793
- 8.777
- 7.931
- 7.926
- 7.913
- 7.909
- 7.893
- 7.888
- 7.866
- 7.849
- 7.388
- 7.385
- 7.372
- 7.369
- 7.357
- 7.260
- 7.132
- 7.129
- 7.127
- 7.117
- 7.114
- 7.112
- 7.091
- 7.086
- 7.068
- 6.950
- 6.948
- 6.945
- 6.943
- 6.933
- 6.932
- 6.928
- 6.926
- 6.811
- 3.906
- 3.861
- 3.594
- 2.490
- 2.369

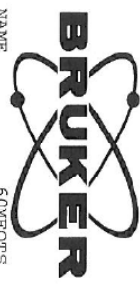

```

NAME          50M0705
EXPNO         1
PROCNO        1
Date_         20090306
Time          18.41
INSTRUM       spect
PROBHD        5 mm CPDUL 13C
PULPROG       zg30
TD            55536
SOLVENT       CDCl3
NS            16
DS            2
SWH           10333.578 Hz
FIDRES        0.137632 Hz
AQ            3.171923 sec
RG            2050
DM            43.400 usec
DE            6.50 usec
TE            292.4 K
DI            1.0000000 sec
TD0           1

===== CHANNEL f1 =====
NUC1          1H
P1            15.00 usec
PL1           0.00 dB
PL1W          8.64411545 W
SFO1          500.1930889 MHz
SI            32758
SF            500.1930044 MHz
WDW           EM
SSB           0
LB            0.30 Hz
GB            0
PC            1.00
    
```

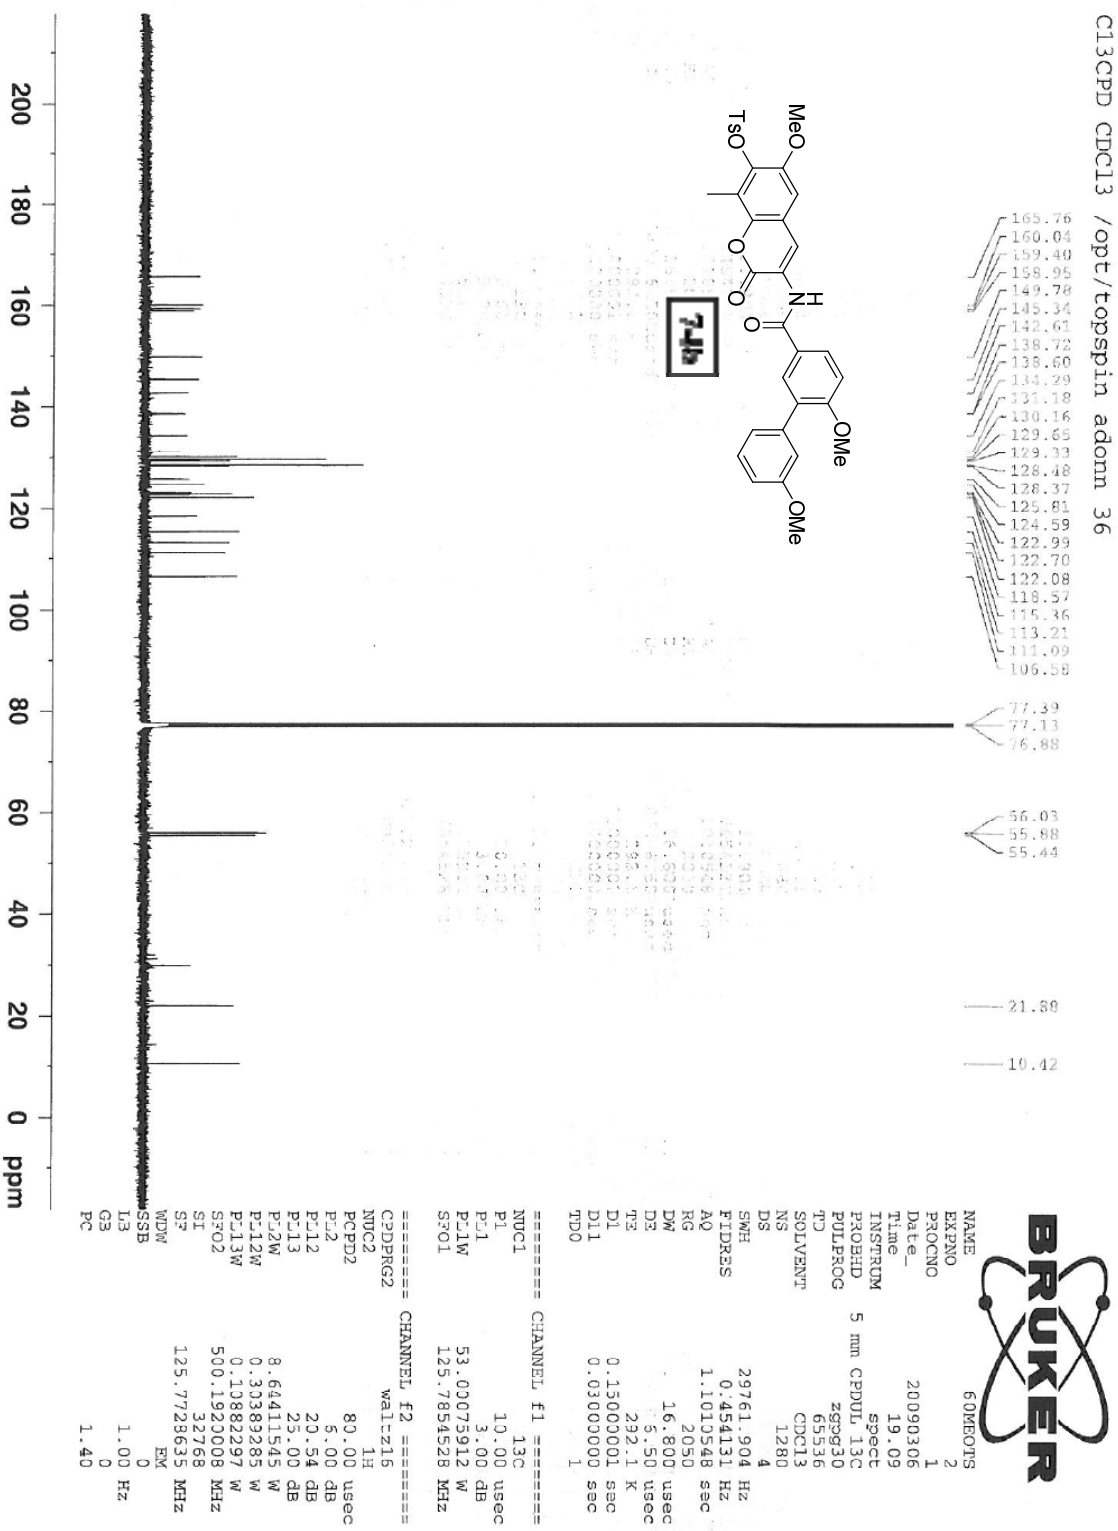

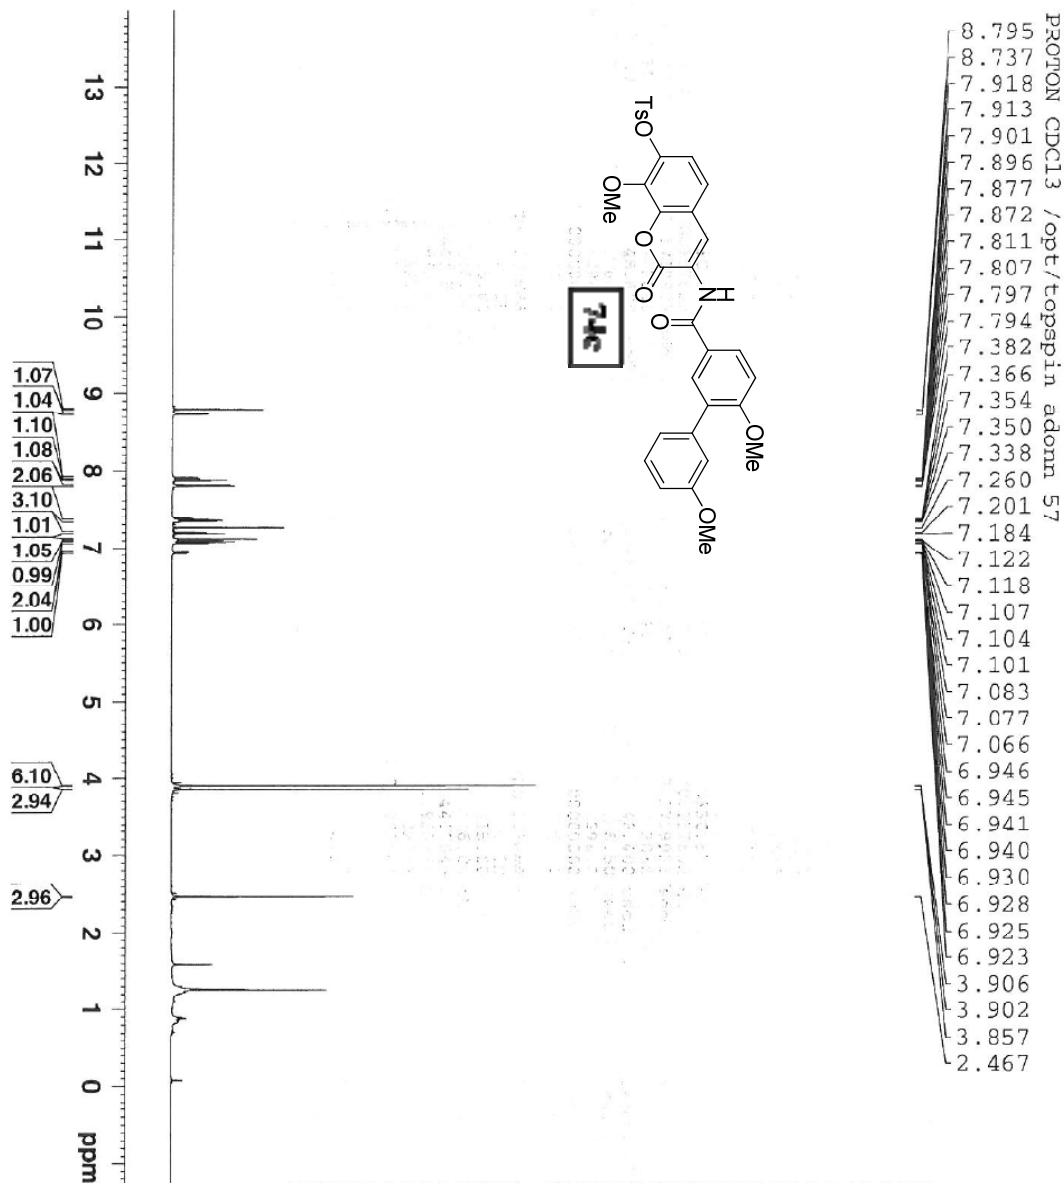

PROTON CDCl3 /opt/topspin adomn 57

|       |
|-------|
| 8.795 |
| 8.737 |
| 7.918 |
| 7.913 |
| 7.901 |
| 7.896 |
| 7.877 |
| 7.872 |
| 7.811 |
| 7.807 |
| 7.797 |
| 7.794 |
| 7.382 |
| 7.366 |
| 7.354 |
| 7.350 |
| 7.338 |
| 7.260 |
| 7.201 |
| 7.184 |
| 7.122 |
| 7.118 |
| 7.107 |
| 7.104 |
| 7.101 |
| 7.083 |
| 7.077 |
| 7.066 |
| 6.946 |
| 6.945 |
| 6.941 |
| 6.940 |
| 6.930 |
| 6.928 |
| 6.925 |
| 6.923 |
| 3.906 |
| 3.902 |
| 3.857 |
| 2.467 |

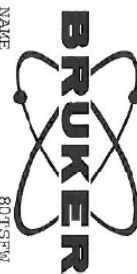

```

NAME      80TSPW
EXPNO     1
PROCNO    1
Date_     20090427
Time      12.41
INSTRUM   spect
PROBHD    5 mm CPDUL 13C
PULPROG   zg30
TD         65536
SOLVENT   CDCl3
NS         16
DS         2
SWH        10330.578 Hz
FIDRES     0.157632 Hz
AQ         3.1719923 sec
RG         2050
DW         48.400 usec
DE         6.50 usec
TE         298.2 K
D1         1.00000000 sec
TD0        1
    
```

```

===== CHANNEL f1 =====
NUC1      1H
P1        15.00 usec
PL1       6.00 dB
PL1LW     8.64411545 W
SF01      500.1930889 MHz
SI         32768
SP        500.1930043 MHz
WDW        EM
SSB        0
LB         0.30 Hz
GB         0
PC         1.00
    
```

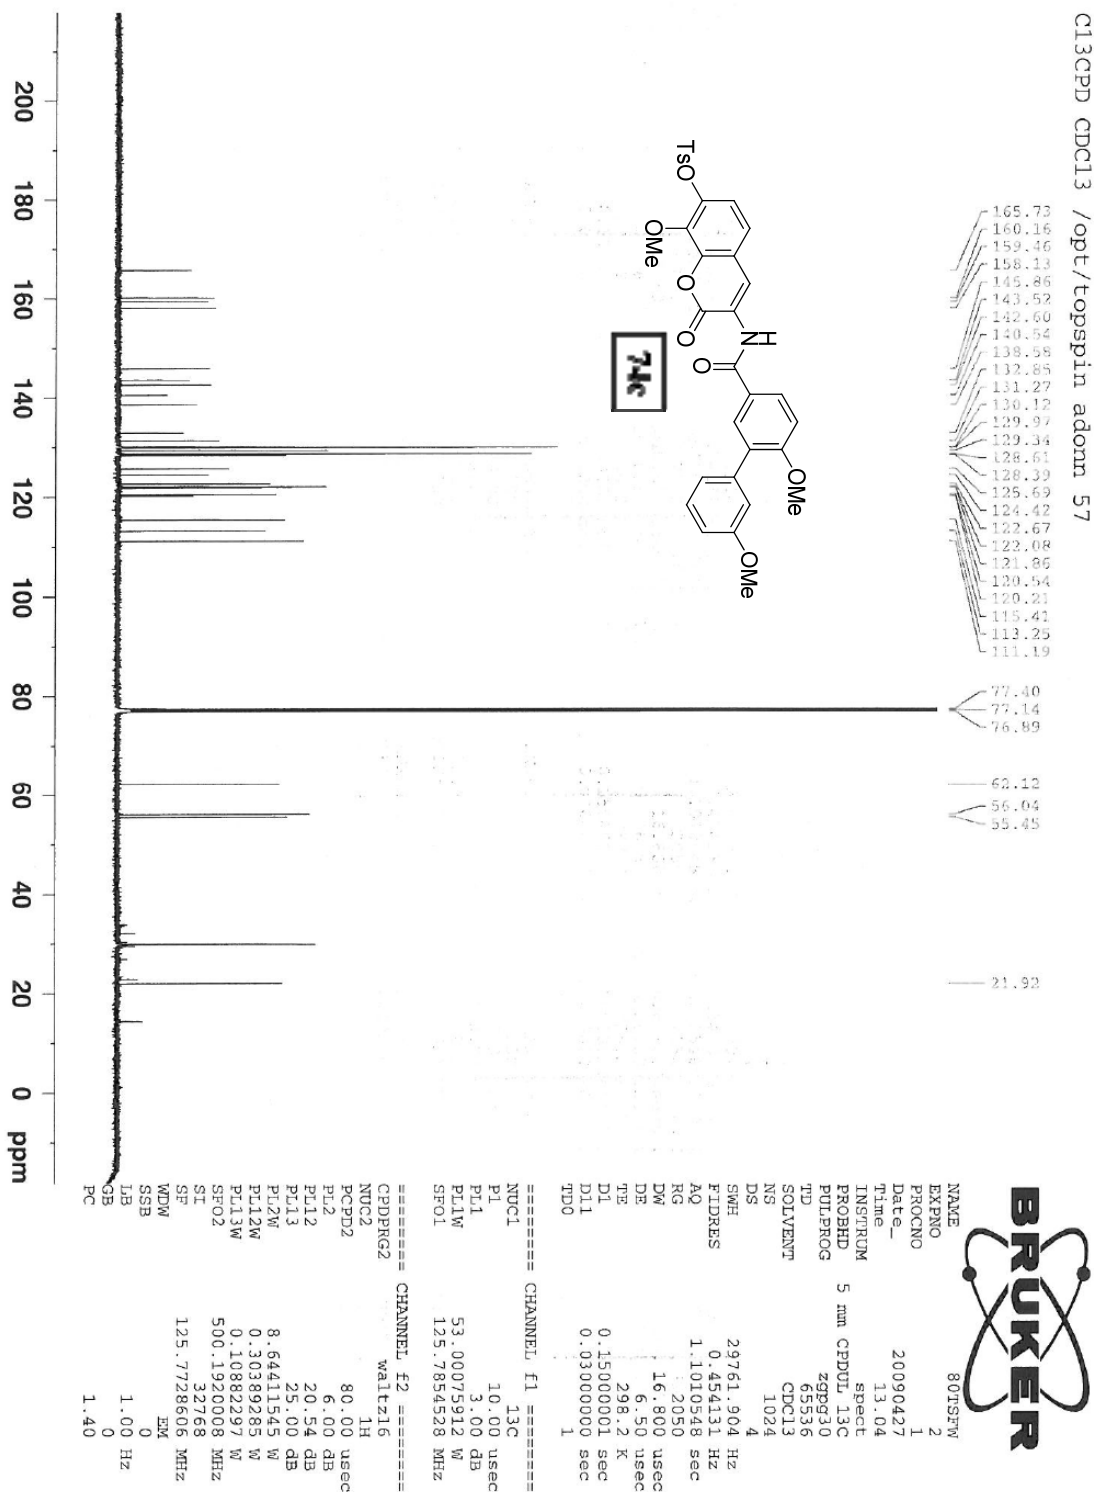

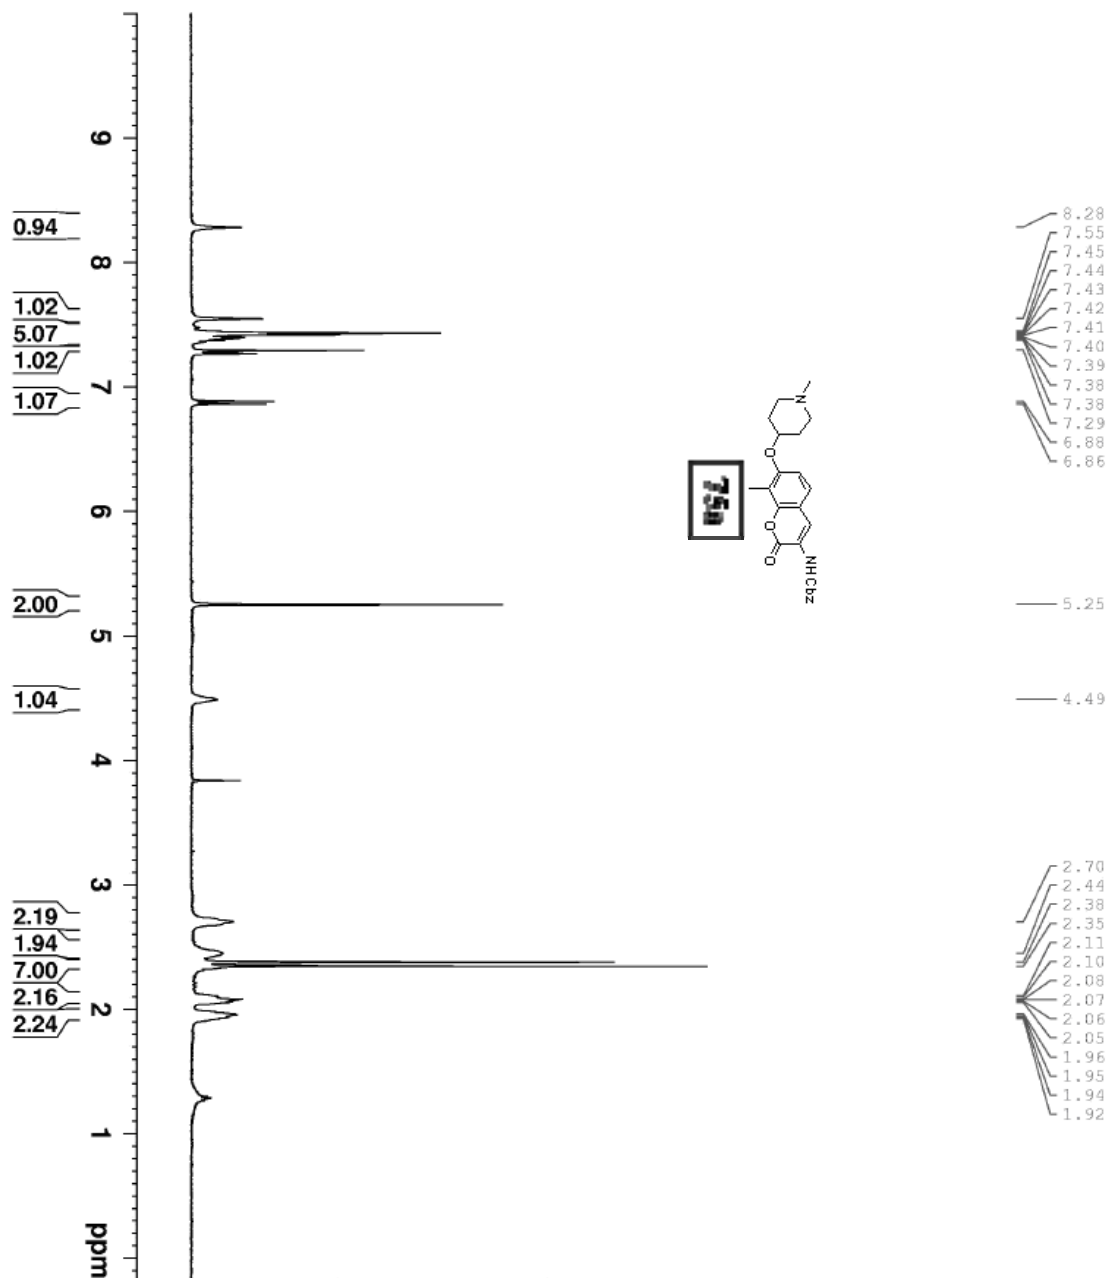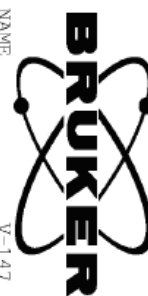

```

NAME V-147
EXNO 1
PROCNO 1
Date_ 20091211
Time_ 16.59
INSTRUM qnp400
PROBHD 1H/13
PULPROG zg30
TD 65536
SOLVENT CDCl3
NS 18
DS 2
SWH 8278.146 Hz
FIDRES 0.126314 Hz
AQ 3.3584243 sec
RG 4
DW 60.400 usec
DE 6.00 usec
TE 294.2 K
D1 1.00000000 sec
TD0 1

===== CHANNEL f1 =====
NUC1 1H
P1 12.50 usec
PL1 -5.00 dB
SFO1 400.1324710 MHz
SI 32768
SF 400.1299957 MHz
WDW EM
SSB 0
LB 0.30 Hz
GB 0
PC 1.00
    
```

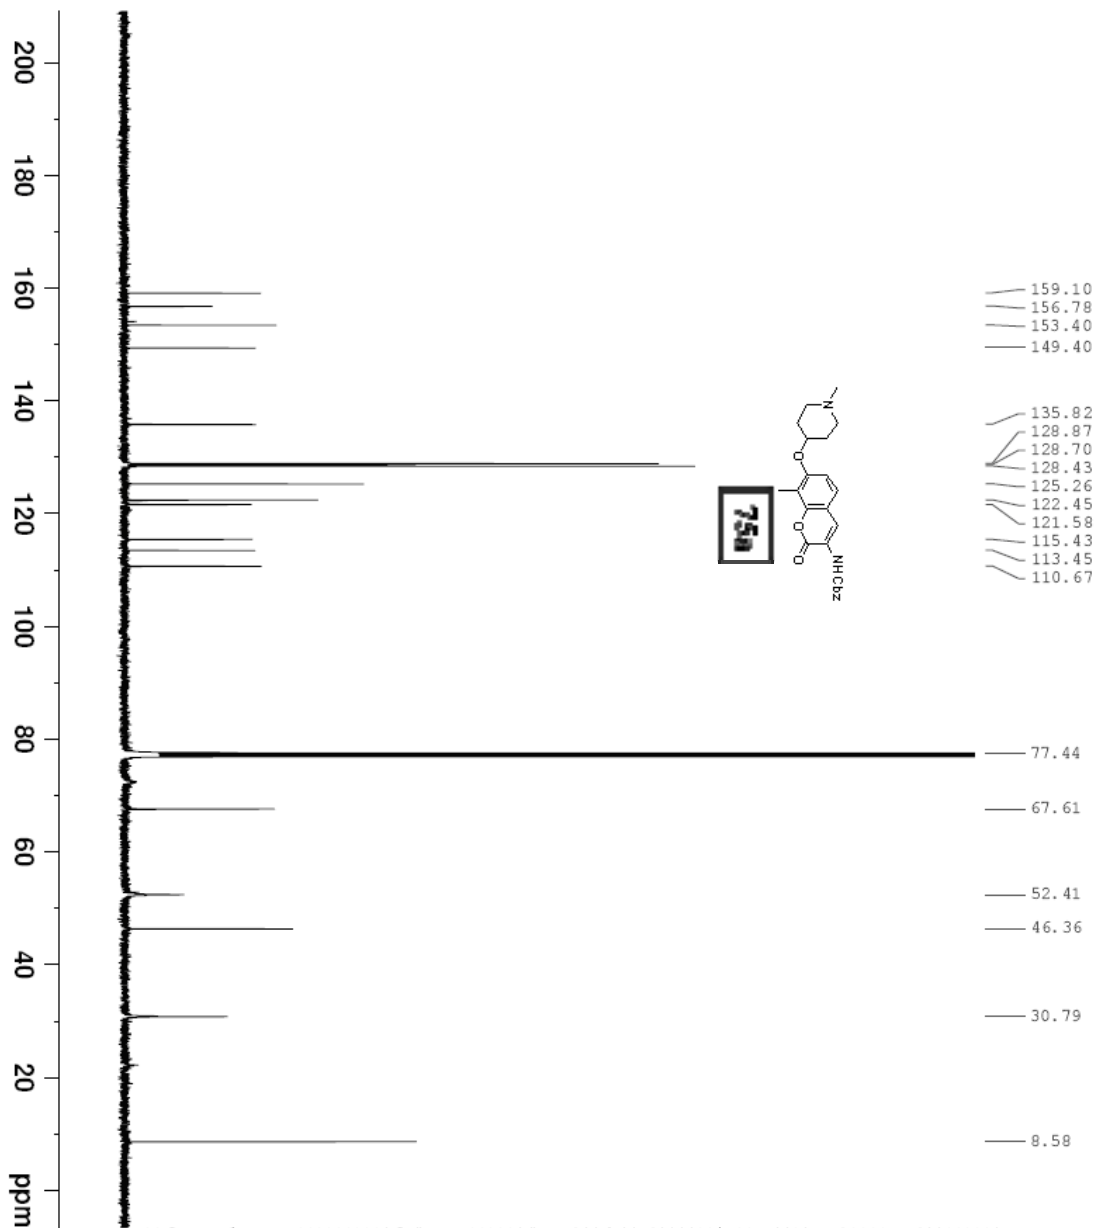

- 159.10
- 156.78
- 153.40
- 149.40
- 135.82
- 128.87
- 128.70
- 128.43
- 125.26
- 122.45
- 121.58
- 115.43
- 113.45
- 110.67

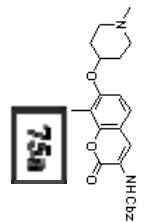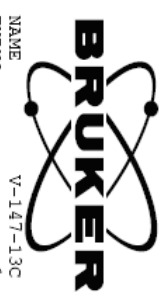

```

NAME          V-147-13C
EXPNO         1
PROCNO        1
Date_         20091211
Time_         22.45
INSTRUM       5 mm QNP 1H/13
PROBHD        dx400
PULPROG       zgpg30
TD            655336
SOLVENT       CDCl3
NS            8192
DS            4
SWH           23980.814 Hz
FIDRES        0.365918 Hz
AQ            1.3664756 sec
RG            32768
DW            20.850 usec
DE            6.00 usec
TE            294.2 K
D1            2.00000000 sec
d11           0.03000000 sec
DELTA         1.89999998 sec
TD0           2
    
```

```

===== CHANNEL f1 =====
NUC1          13C
P1            10.75 usec
PL1          -2.00 dB
SFO1         100.6228298 MHz
    
```

```

===== CHANNEL f2 =====
CPDPRG2      waltz16
NUC2          1H
PCPD2        100.00 usec
PL2          -5.00 dB
PL12         13.06 dB
PL13         16.00 dB
SFO2         400.1316005 MHz
SI           32768
SF           100.6127498 MHz
WDW           EM
SSB           0
LB           1.00 Hz
GB           0
PC           1.40
    
```



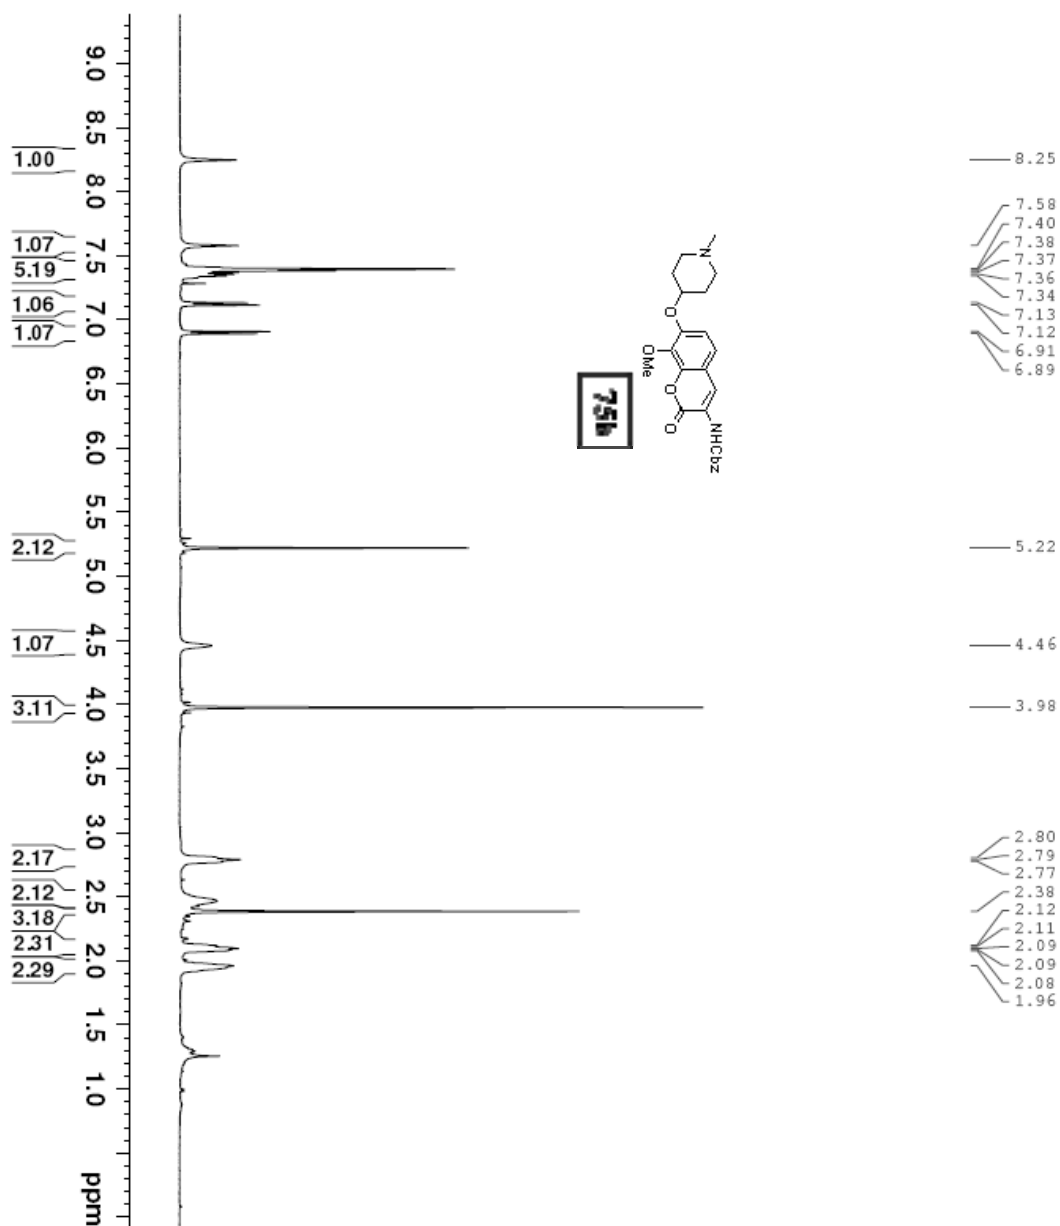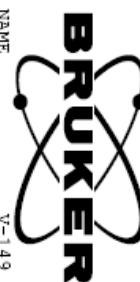

```

NAME          V-149
EXPNO         1
PROCNO        1
Date_         20090317
Time         17.37
INSTRUM       spect
PROBHD        5 mm BBO BB-1H
PULPROG       zg30
TD            65536
SOLVENT       CDCl3
NS            16
DS            2
SWH           10330.578 Hz
FIDRES        0.157632 Hz
AQ            3.1720407 sec
RG            4
DM            48.400 usec
DE            6.00 usec
TE            297.2 K
D1            1.00000000 sec
ID0           1

===== CHANNEL f1 =====
NUC1          1H
P1            9.60 usec
PL1          -5.00 dB
SFO1         500.1330885 MHz
SI           32768
SF           500.1300000 MHz
WDW           EM
SSB           0
LB           0.30 Hz
GB           0
PC           1.00
    
```

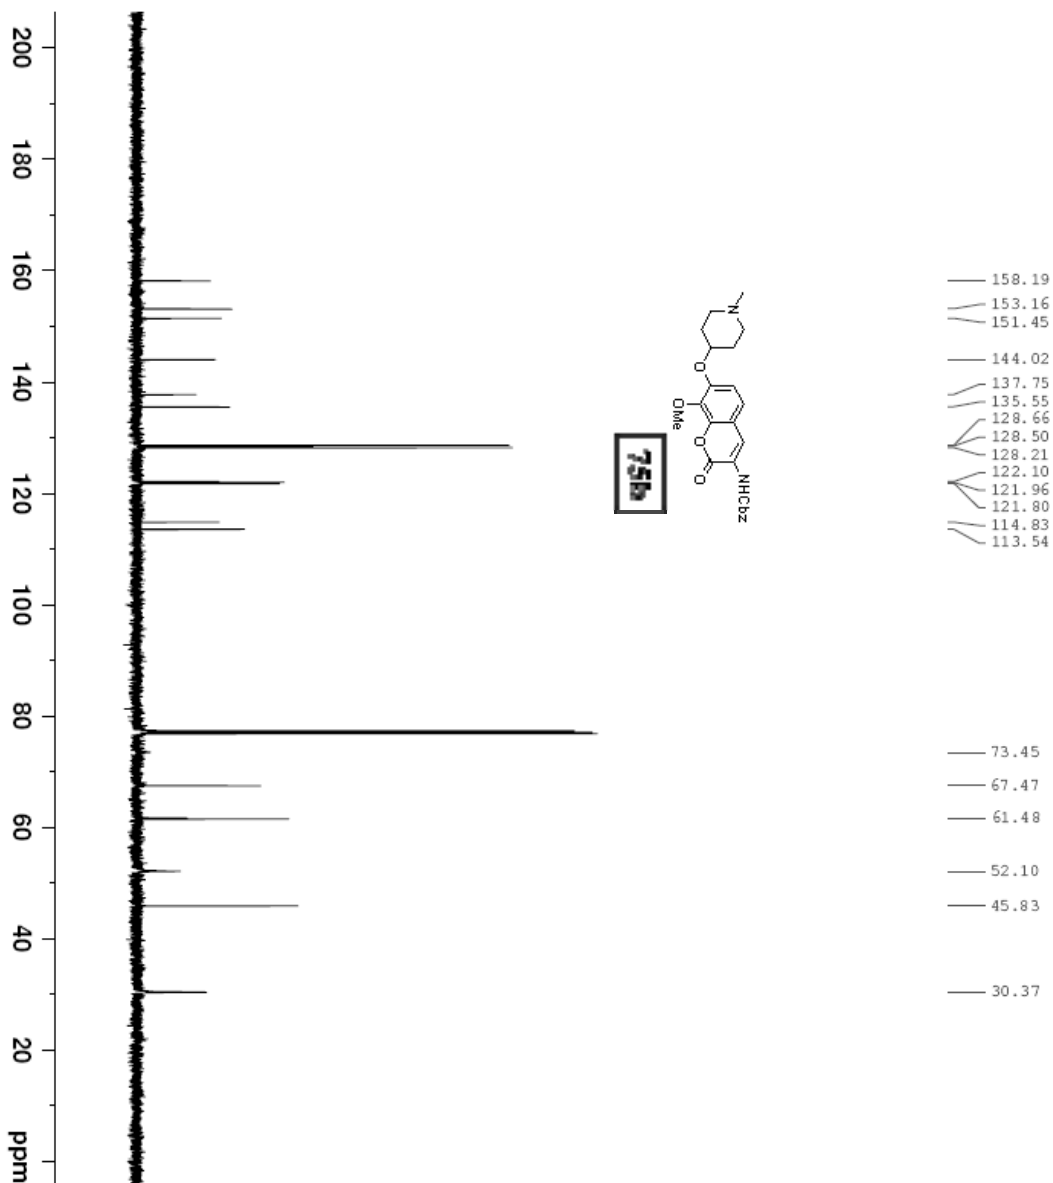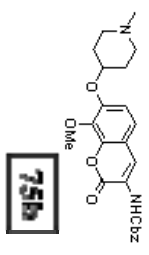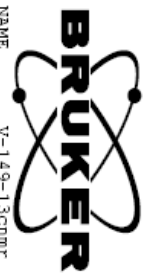

NAME V-149-13cmr1  
 EXPNO 1  
 PROCNO 1  
 Date\_ 20090317  
 Time 17.42  
 INSTRUM spect  
 PROBHD 5 mm BBO BB-1H  
 PULPROG zgpg30  
 ID zgpg30  
 SOLVENT CDCl3  
 NS 258  
 DS 4  
 SWH 30030.029 HZ  
 FIDRES 0.458232 HZ  
 AQ 1.0912410 sec  
 RG 32768  
 DW 16.650 usec  
 DE 6.00 usec  
 TE 298.2 K  
 D1 0.15000001 sec  
 d11 0.03000000 sec  
 DELTA 0.05000000 sec  
 ID0 4

===== CHANNEL F1 =====  
 NUC1 13C  
 P1 8.90 usec  
 PL1 -1.15 dB  
 SFO1 125.7703643 MHZ

===== CHANNEL F2 =====  
 CPDPRG2 waltz16  
 NUC2 1H  
 PCPD2 95.00 usec  
 PL2 -5.00 dB  
 PL12 15.86 dB  
 PL13 30.00 dB  
 SFO2 500.1320005 MHZ  
 SI 32768  
 SF 125.7577890 MHZ  
 WDW EM  
 SSB 0  
 LB 1.00 HZ  
 GB 0  
 PC 1.40

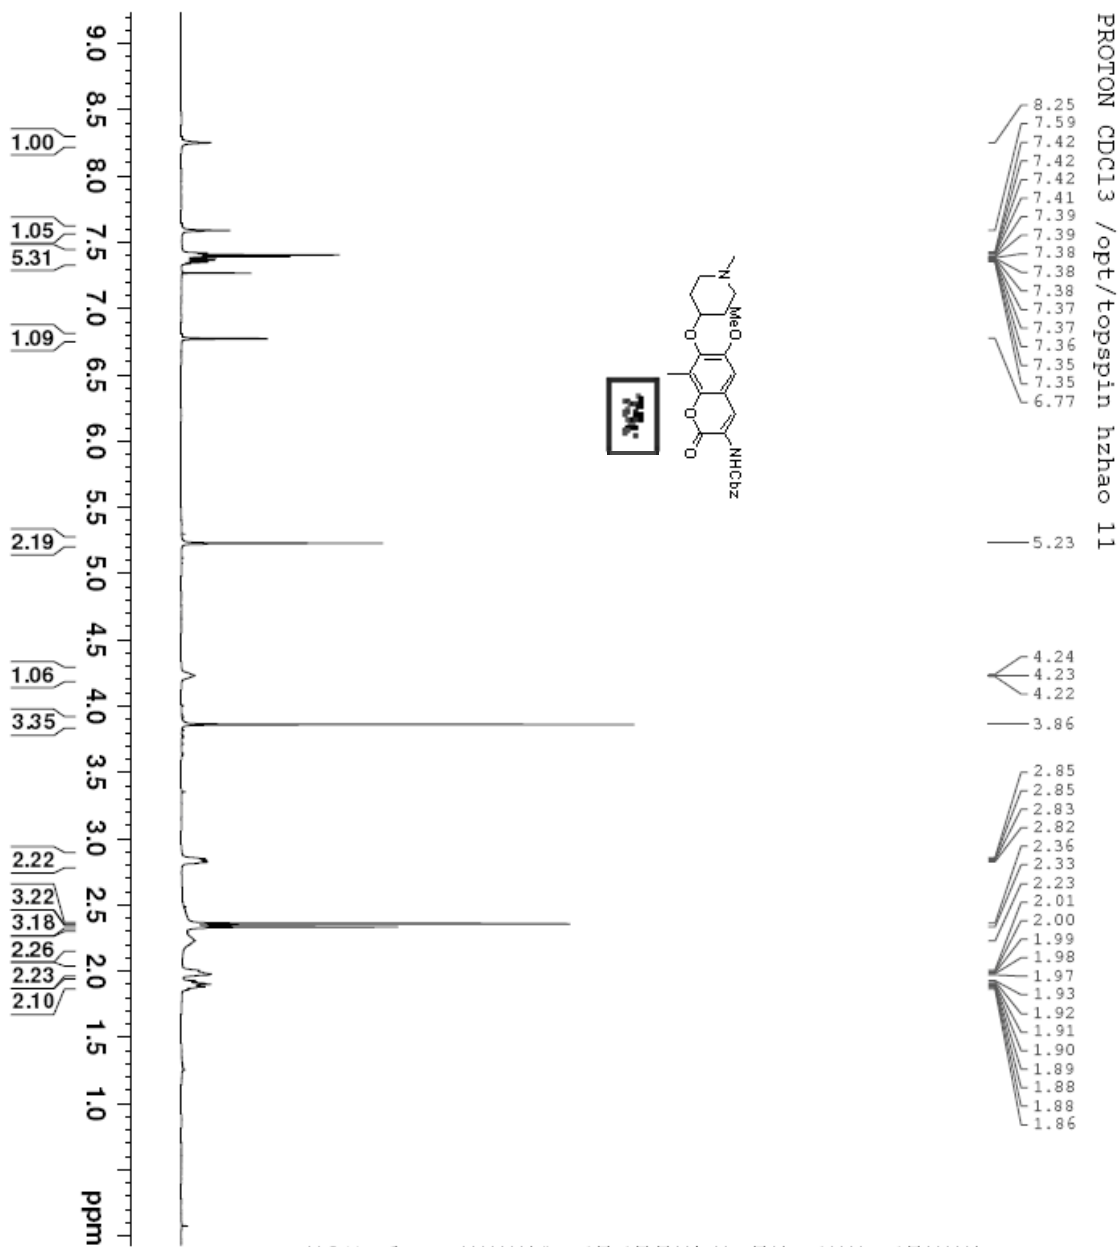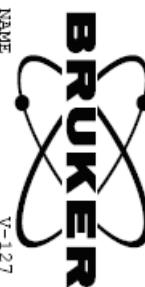

NAME V-127  
 EXPNO 1  
 PROCNO 1  
 Date\_ 20090521  
 Time 15.46  
 INSTRUM spect  
 PROBRD 5 mm CPDUL 13C  
 PULPROG zg30  
 ID 65536  
 SOLVENT CDCl3  
 NS 16  
 DS 2  
 SWH 10330.578 Hz  
 FIDRES 0.157632 Hz  
 AQ 3.1719923 sec  
 RG 1290  
 DW 48.400 usec  
 DE 6.50 usec  
 TE 298.2 K  
 D1 1.00000000 sec  
 TD0 1

==== CHANNEL f1 =====  
 NUC1 1H  
 P1 15.00 usec  
 PL1 6.00 dB  
 PL1W 8.64411545 W  
 SFO1 500.1930889 MHz  
 SI 32768  
 SF 500.1939994 MHz  
 WDW EM  
 SSB 0  
 LB 0.30 Hz  
 GB 0  
 PC 1.00

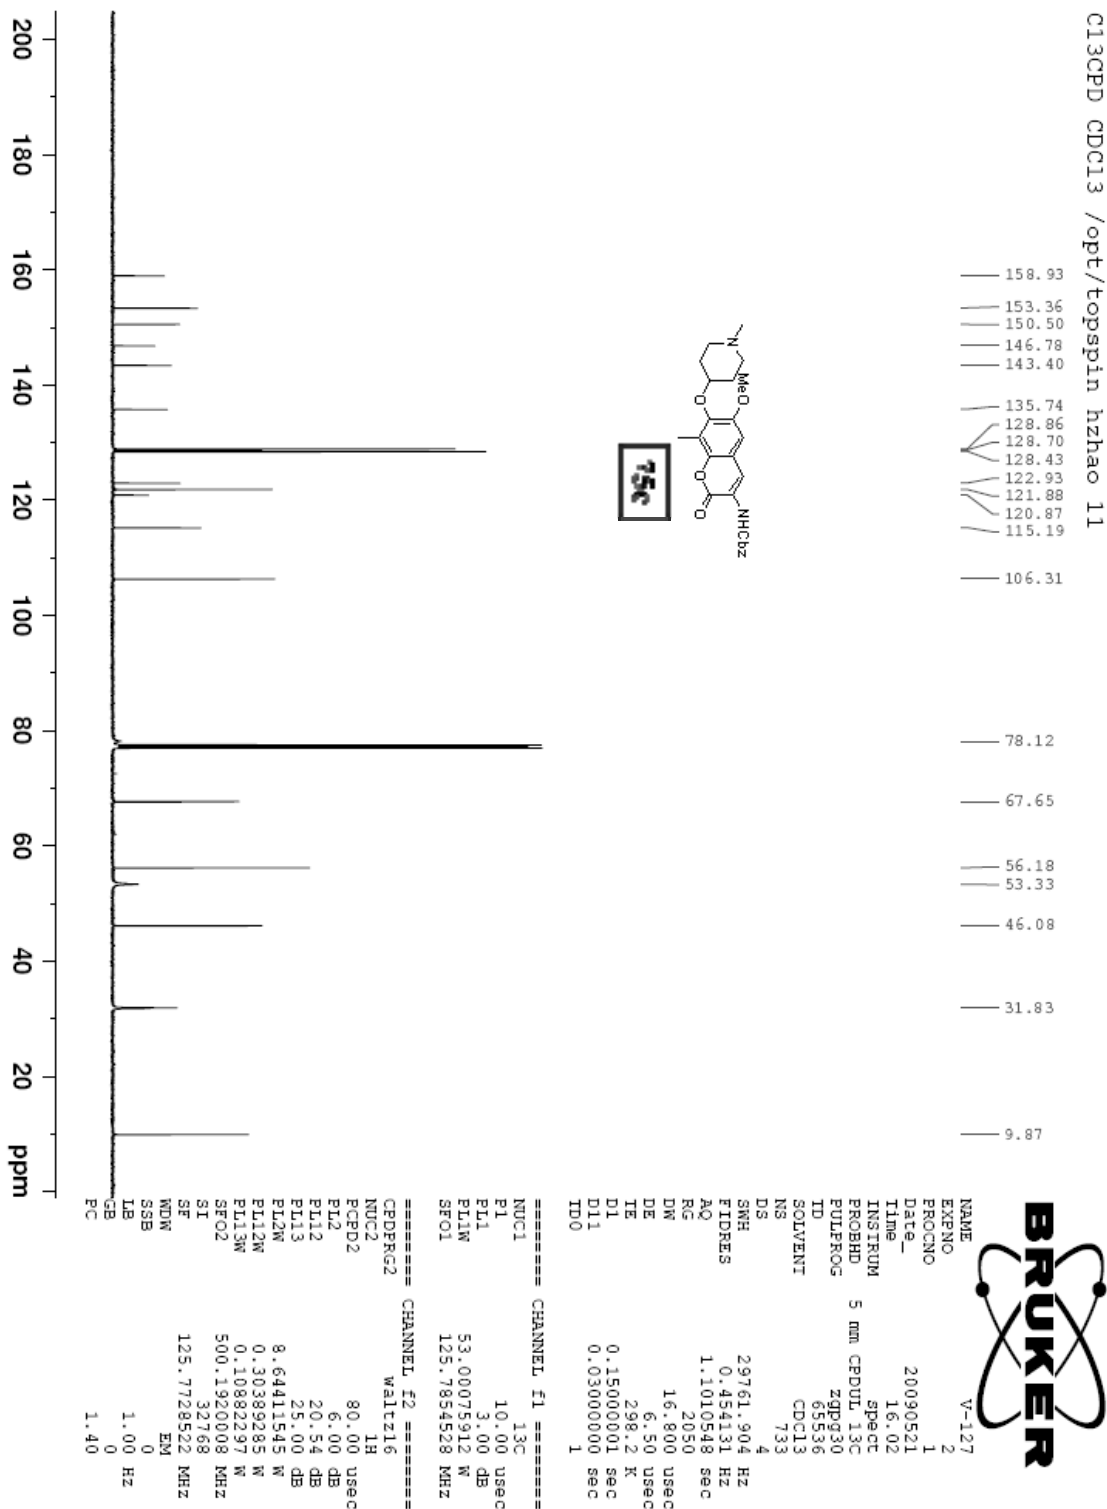

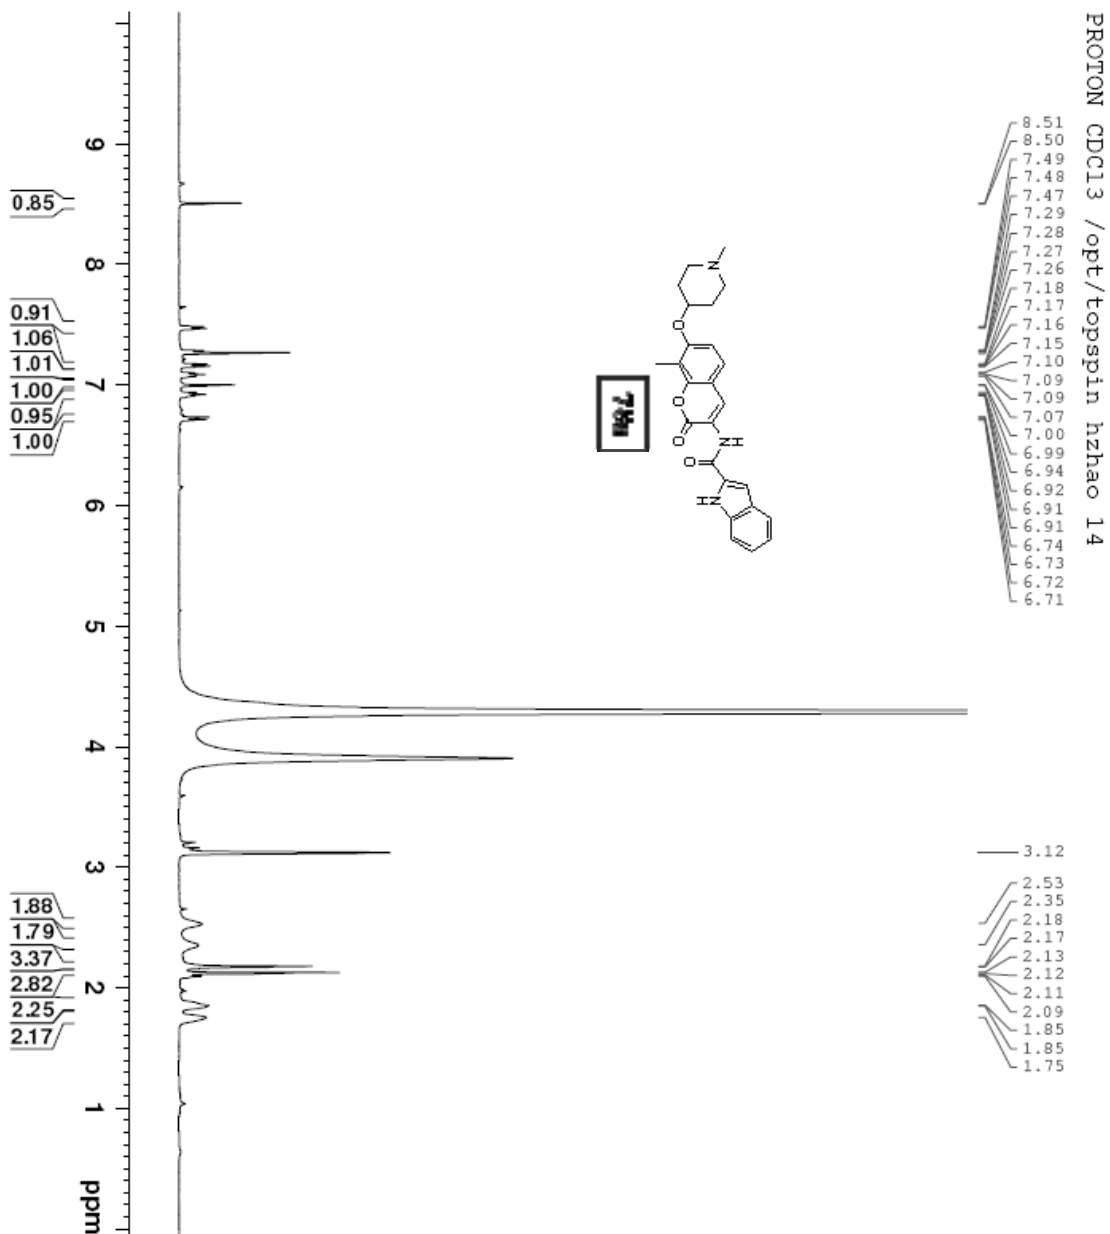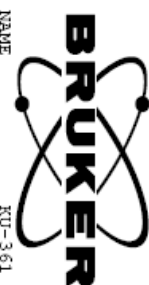

```

NAME          KU-361
EXNO          1
PROCNO        1
Date_         20090512
Time_         14.25
INSTRUM       spect
PROBHD        5 mm CPDUL 13C
PULPROG       zg30
ID            2930
SOLVENT       CDCl3
NS            16
DS            2
SWH           10330.578 HZ
FIDRES        0.157632 HZ
AQ            3.171923 sec
RG            912
DW            48.400 usec
DE            6.50 usec
TE            298.2 K
D1            1.00000000 sec
TD0           1

===== CHANNEL f1 =====
NUC1          1H
P1            15.00 usec
PL1           6.00 dB
PL1W          8.6441545 W
SFO1          500.1930889 MHz
SI            32768
SF            500.1920669 MHz
WDW           EM
SSB           0
LB            0.30 HZ
GB            0
PC            1.00
    
```

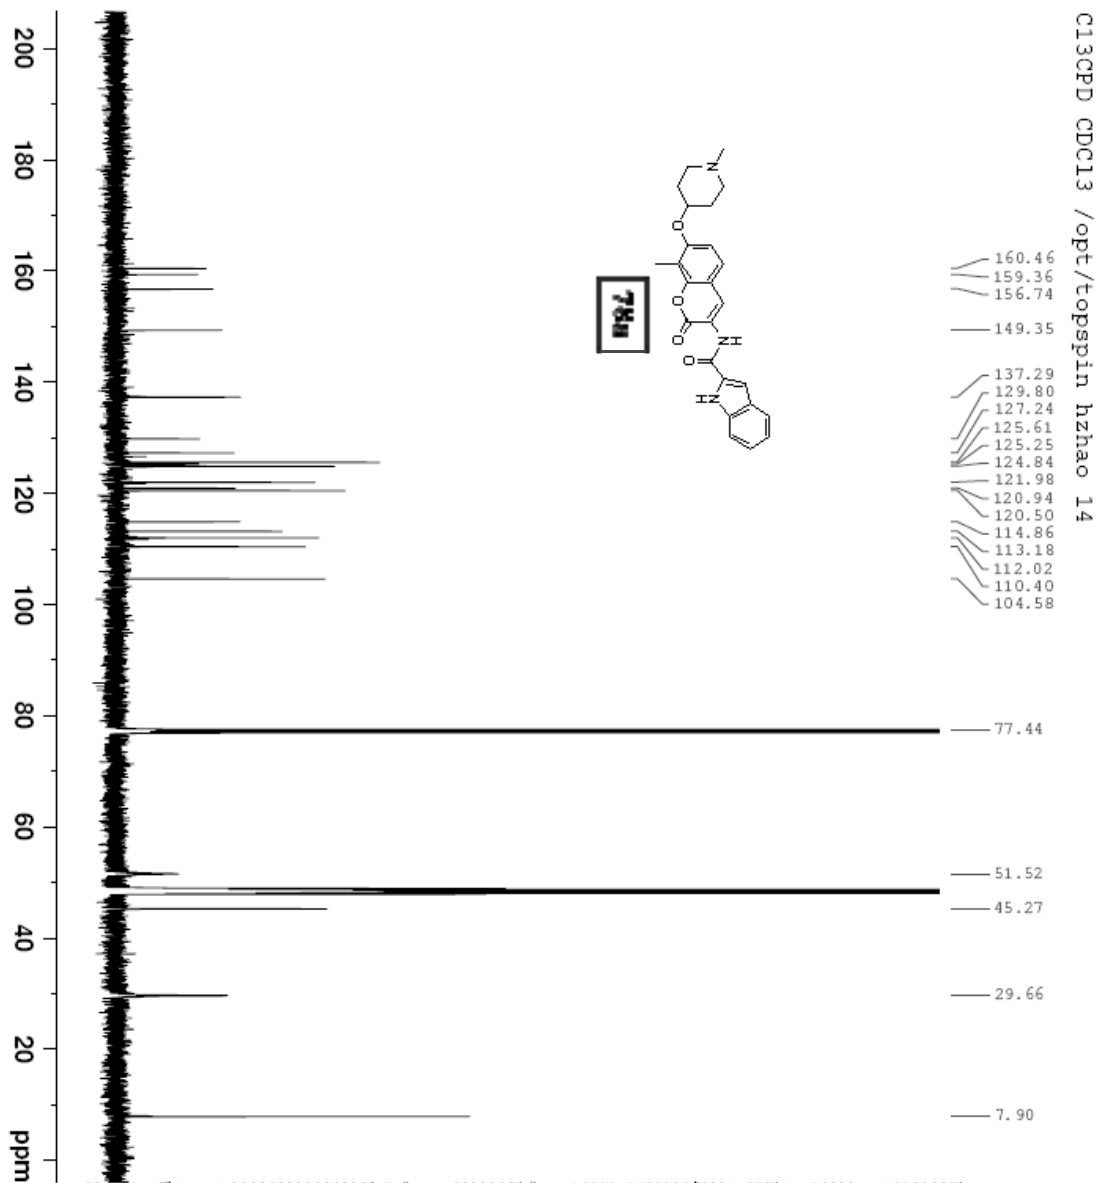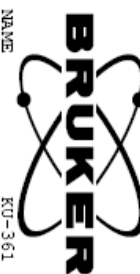

```

NAME          KU-361
EXPNO        2
PROCNO       1
Date_        20090512
Time         15.10
INSTRUM      spect
PROBHD       5 mm CPDUI 13C
PULPROG      zgpg30
TD           65536
SOLVENT      CDCl3
NS           2048
DS           4
SWH          29761.904 Hz
FIDRES      0.454131 Hz
AQ          1.1010548 sec
RG          2050
DW          16.800 usec
DE          6.50 usec
TE          298.2 K
D1          0.15000001 sec
D11         0.030000000 sec
TD0         1

===== CHANNEL f1 =====
NUC1        13C
P1          10.00 usec
PL1         3.00 dB
PL1W       53.00073912 W
SFO1        125.7854528 MHz

===== CHANNEL f2 =====
CPDPRG2     waltz16
NUC2         1H
PCPD2       80.00 usec
PL2         6.00 dB
PL12        20.54 dB
PL13        25.00 dB
PL1W        8.64411545 W
PL2W        0.30389285 W
PL12W       0.10982297 W
SFO2        500.1920008 MHz
SI          32768
SF          125.7733857 MHz
WDW         EM
SSB         0
GB          0
PC          1.40
    
```

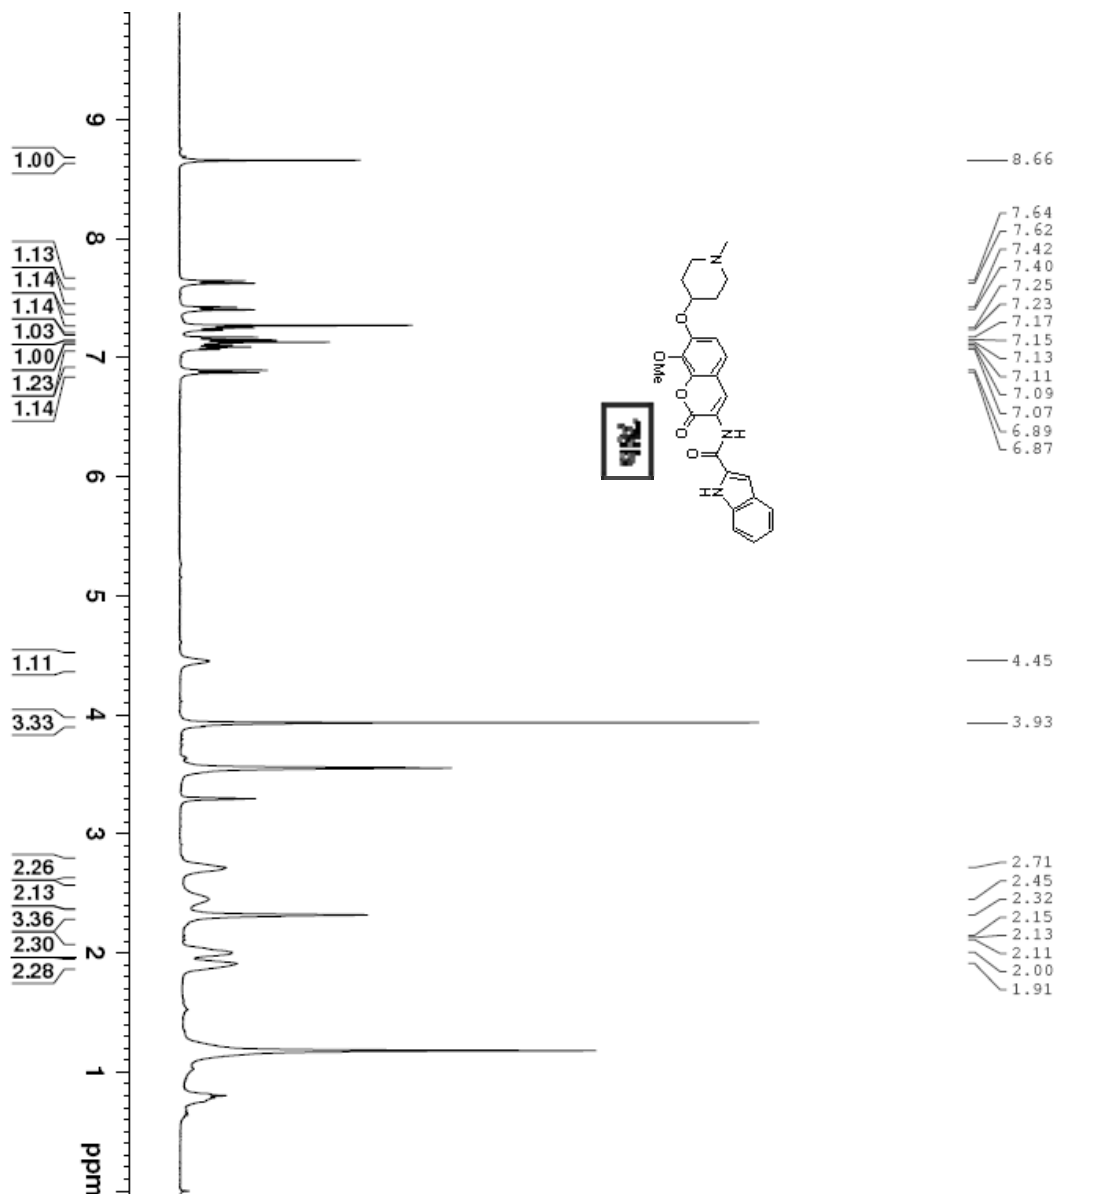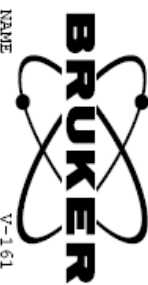

```

NAME          V-161
EXPNO         1
PROCNO        1
Date_         20090401
Time_         14.44
INSTRUM       dtx400
PROBHD        zg30
PULPROG       zg30
TD            65536
SOLVENT       CDCl3
NS            16
DS            2
SWH           8278.146 Hz
FIDRES        0.126314 Hz
AQ            3.9584243 sec
RG            256
DE            60.400 usec
TE            294.4 K
D1            1.00000000 sec
TD0           1

===== CHANNEL f1 =====
NUC1          1H
P1            10.50 usec
PL1           -5.00 dB
SFO1         400.1324710 MHz
SI           32768
SF           400.1300056 MHz
WDW           EM
SSB           0
GB            0
PC            1.00
    
```

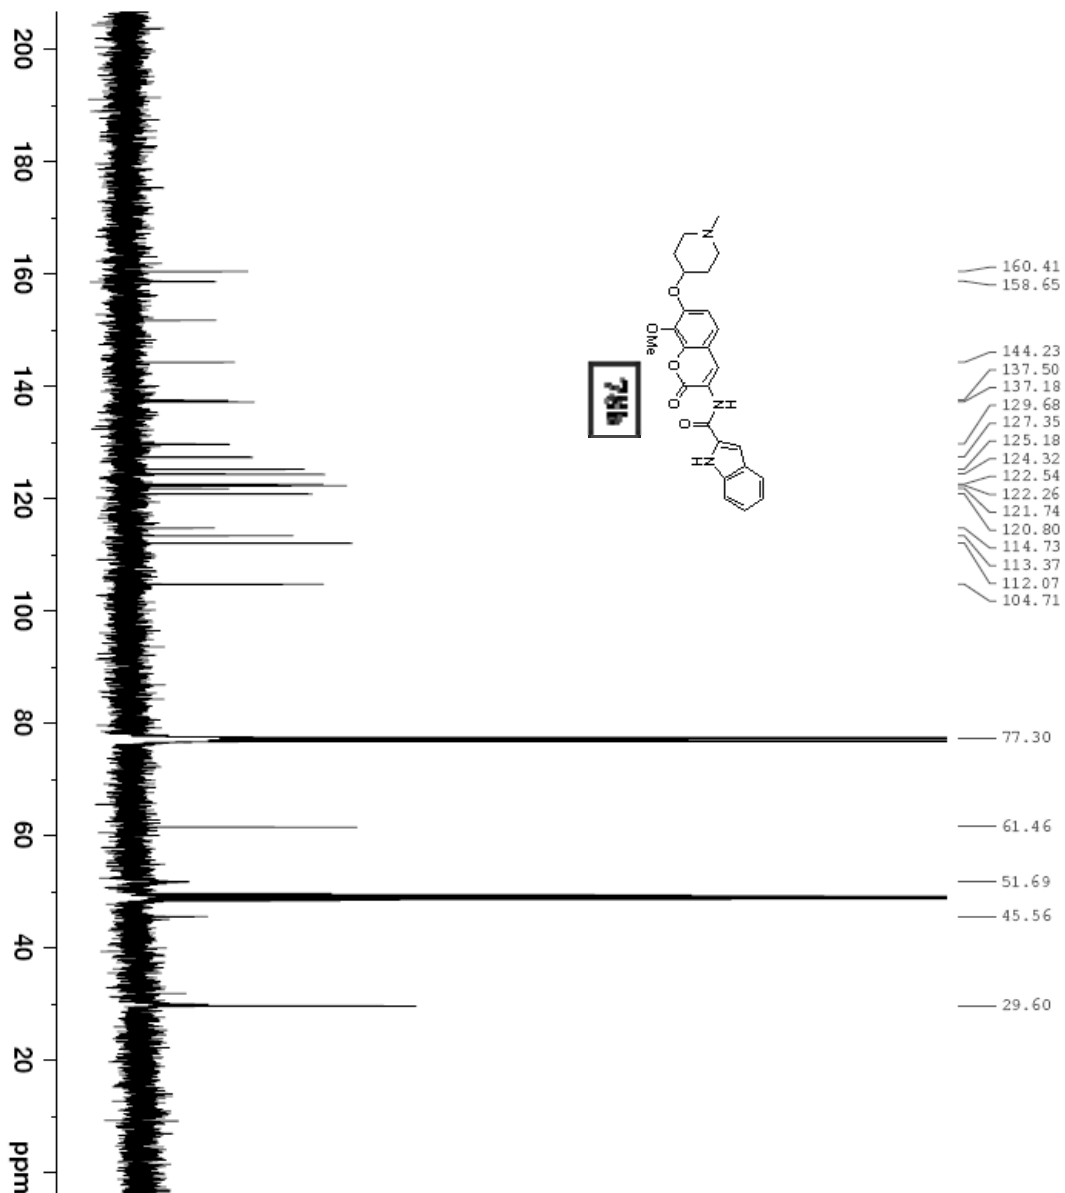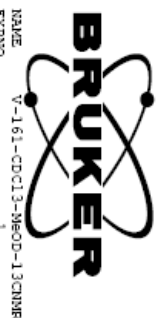

NAME V-161-CDCl3-MEOD-13CNMR  
 EXPNO 1  
 PROCNO 1  
 Date\_ 20090401  
 Time 21.22  
 INSTRUM dxs400  
 PROBRD 5 mm QNP 1H/13  
 PULPROG zgpg30  
 TD 65536  
 F2 1651  
 SOLVENT CDCl3  
 NS 1651  
 DS 4  
 SWH 23980.814 HZ  
 FIDRES 0.365918 HZ  
 AQ 1.3664756 sec  
 RG 32758  
 DM 20.850  
 DE 6.00 usec  
 TE 294.4 K  
 D1 2.00000000 sec  
 d11 0.03000000 sec  
 DELTA 1.889999998 sec  
 TD0 2

----- CHANNEL f1 -----  
 NUCL 13C  
 P1 9.05 usec  
 PL1 -2.00 dB  
 SFO1 100.6282998 MHz

----- CHANNEL f2 -----  
 CDPRG22 WALTZ16  
 NUCL2 1H  
 P2 100.00 usec  
 PL2 -5.00 dB  
 PL12 14.58 dB  
 PL13 18.00 dB  
 SFO2 400.1318005 MHz  
 S1 32768  
 SF 100.6127690 MHz  
 WDW EM  
 SSB 0  
 LB 1.00 HZ  
 GB 0  
 PC 1.40



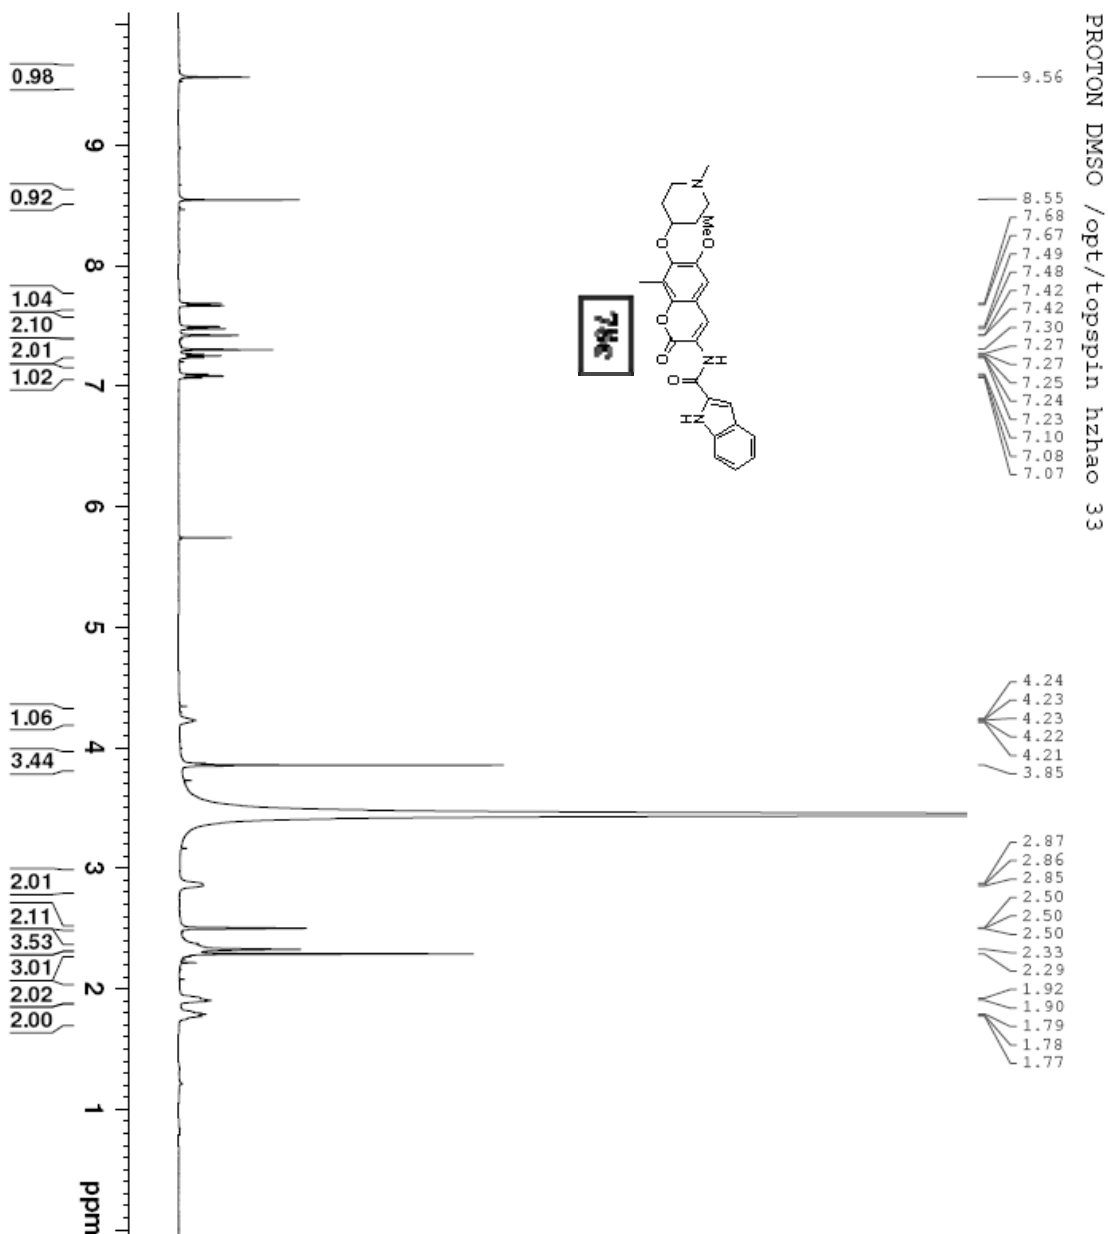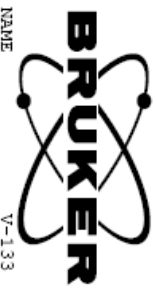

```

NAME          V-133
EXPNO         1
PROCNO        1
Date_         20090520
Time          2.10
INSTRUM       spect
PROBHD        5 mm CPDUL 13C
PULPROG       zg30
TD            65536
SOLVENT       DMSO
NS            16
DS            2
SWH           10330.578 Hz
FIDRES        0.157632 Hz
AQ            3.1719923 sec
RG            48.400 usec
DW            724
DE            6.50 usec
TE            298.2 K
D1            1.00000000 sec
TD0           1

===== CHANNEL F1 =====
NUC1          1H
P1            15.00 usec
PL1           6.00 dB
PL1W          8.64411545 W
SFO1          500.1330889 MHz
SI            32768
SF            500.1300003 MHz
WDW           EM
SSB           0
LB            0.30 Hz
GB            0
PC            1.00
    
```

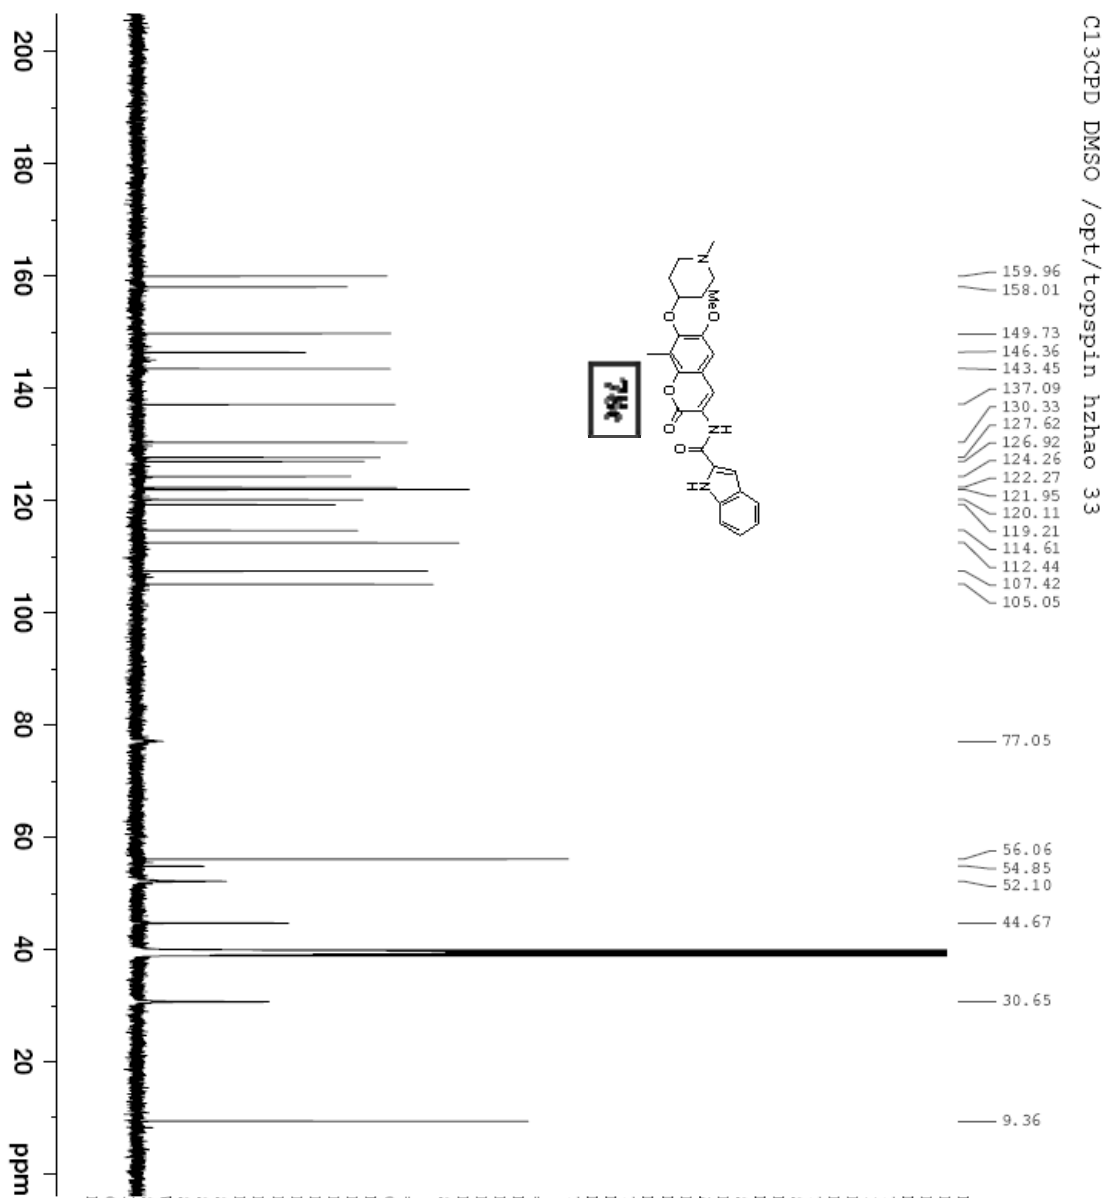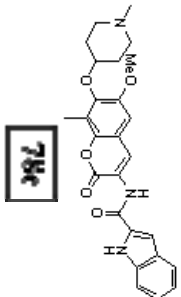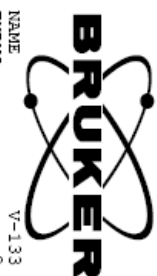

```

NAME V-133
EXPNO 2
PROCNO 1
Date_ 20090520
Time 2.44
INSTRUM spect
PROBHD 5 mm CPDUL 13C
PULPROG zgpg30
TD 65536
SOLVENT DMSO
NS 1536
DS 4
SWH 29761.904 Hz
FIDRES 0.454131 Hz
AQ 1.1010548 sec
RG 2050
RG 2050
DW 16.800 usec
DE 6.50 usec
TE 298.2 K
D1 0.15000001 sec
D11 0.030000000 sec
TD0 1
===== CHANNEL f1 =====
NUC1 13C
P1 10.00 usec
PL1 3.00 dB
P1A1 53.00075912 W
SFO1 125.7854528 MHz
===== CHANNEL f2 =====
CPDPRG2 waltz16
NUC2 1H
PCPD2 80.00 usec
FL2 6.00 dB
PL12 20.54 dB
PL13 25.00 dB
PL2W 8.64411545 W
PL12W 0.30389285 W
PL13W 0.10882297 W
SFO2 500.1920008 MHz
SI 32768
SF 125.7729389 MHz
K0W 0
NSB 0
GB 0
PC 1.40
    
```

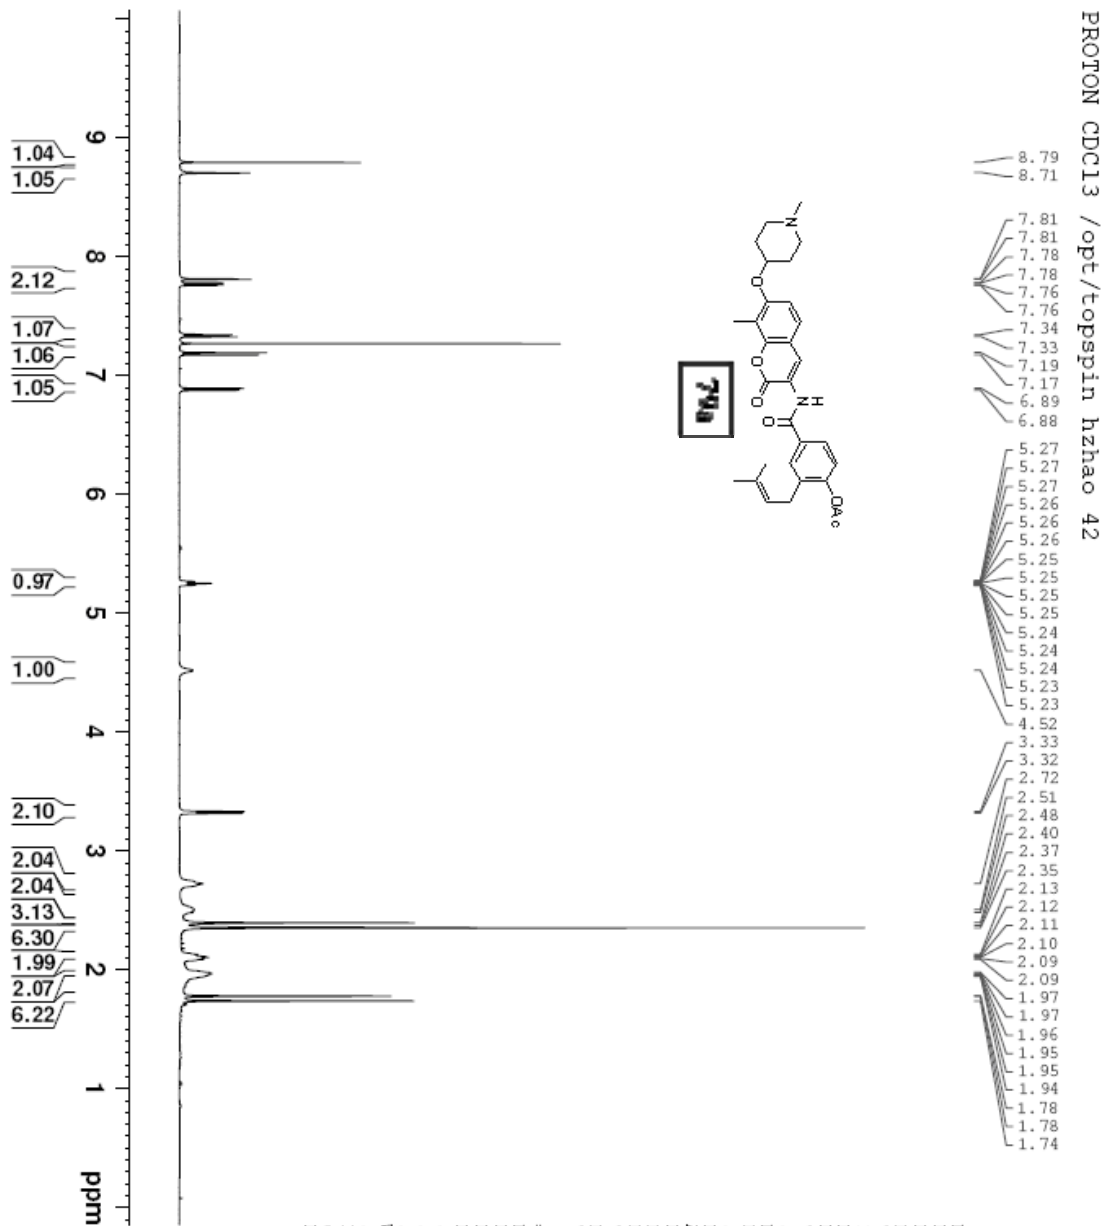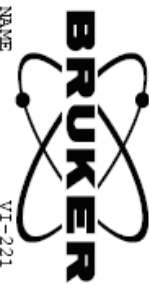

```

NAME          VI-221
EXPNO         1
PROCNO        1
Date_         20090827
Time          13.15
INSTRUM       spect
PROBHD        5 mm CPDPU1 13C
PULPROG       zgpg30
TD            65536
SOLVENT       CDCl3
NS            16
DS            2
SWH           10330.578 Hz
FIDRES        0.157632 Hz
AQ            3.1719923 sec
RG            2050
TW            48.400 usec
DE            6.50 usec
TE            298.2 K
D1            1.00000000 sec
TD0           1

===== CHANNEL f1 =====
NUC1           1H
P1            15.00 usec
PL1           6.00 dB
PL1W          8.64411545 W
SFO1          500.1330889 MHz
SI            32768
SF            500.1399994 MHz
WDW           EM
SSB           0
GB            0
PC            1.00
    
```

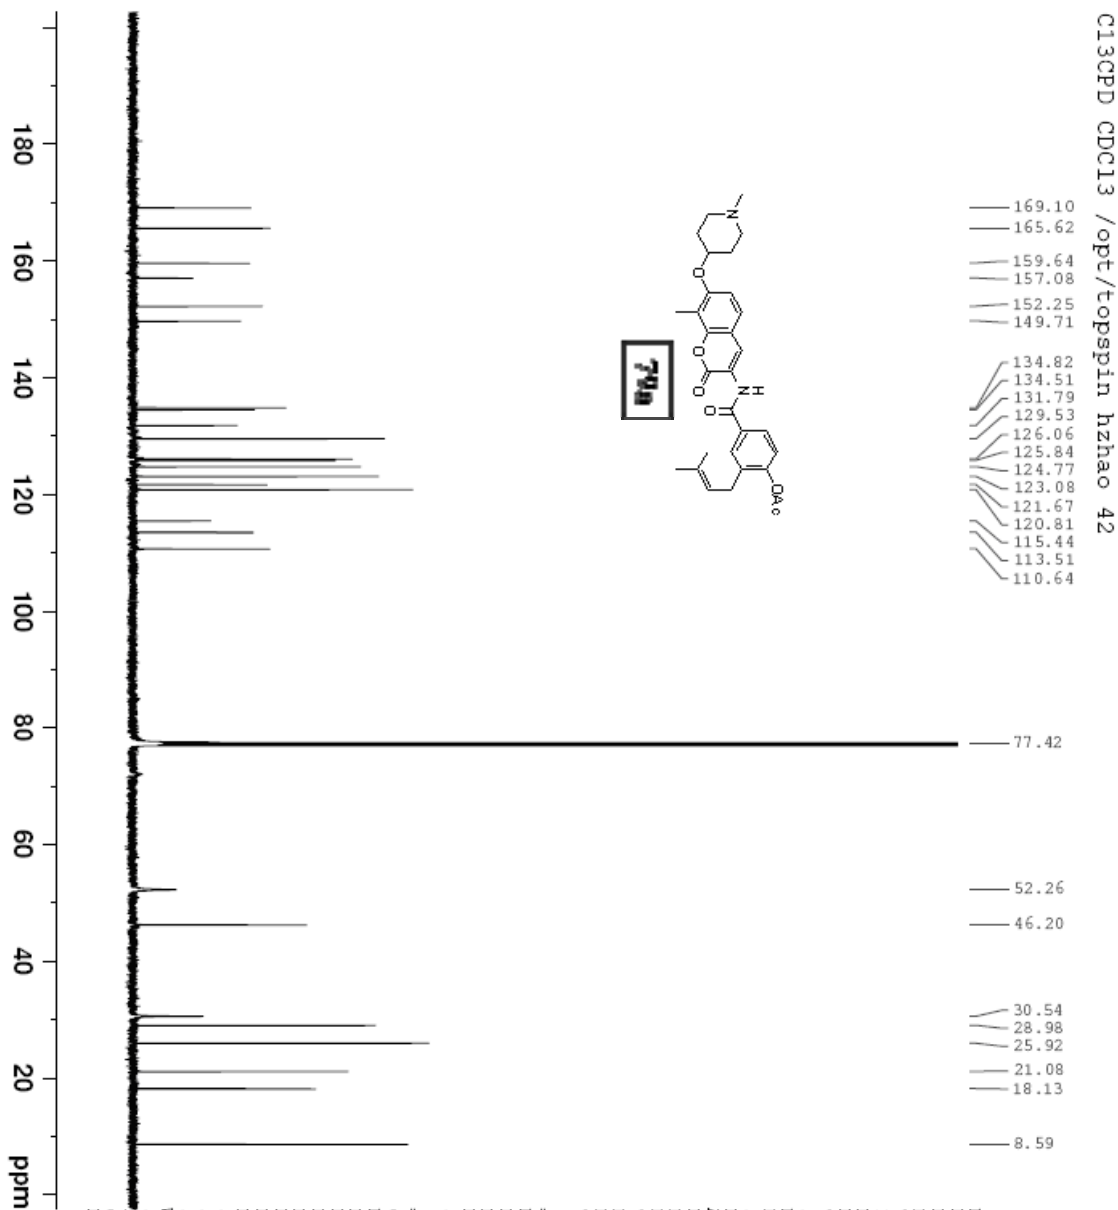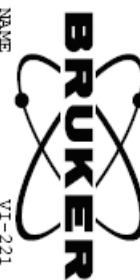

```

NAME          VI-221
EXPNO         2
PROCNO        1
Date_         20090827
Time_         14.00
INSTRUM       spect
PROBHD        5 mm CPDUL 13C
PULPROG       zgpg30
TD            65536
SOLVENT       CDCl3
NS            2048
DS            4
SMH           29761.904 Hz
FIDRES        0.454131 Hz
AQ            1.1010548 sec
RG            2050
DW            16.900 usec
DE            6.50 usec
TE            298.2 K
D1            0.15000001 sec
D11           0.030000000 sec
TD0           1
    
```

```

===== CHANNEL f1 =====
NUC1          13C
P1            10.00 usec
PL1           3.00 dB
PL1W         53.00073912 W
SFO1         125.7854528 MHz
    
```

```

===== CHANNEL f2 =====
CPDPRG2      waltz16
NUC2          1H
PCPD2        80.00 usec
PL2           6.00 dB
PL12         20.54 dB
PL13         25.00 dB
PL12W        8.64411545 W
PL13W        0.30389285 W
SFO2         500.1920008 MHz
SI           32768
SE           125.7728512 MHz
MAG          EM
SSB          0
GB           1.00 Hz
PC           1.40
    
```

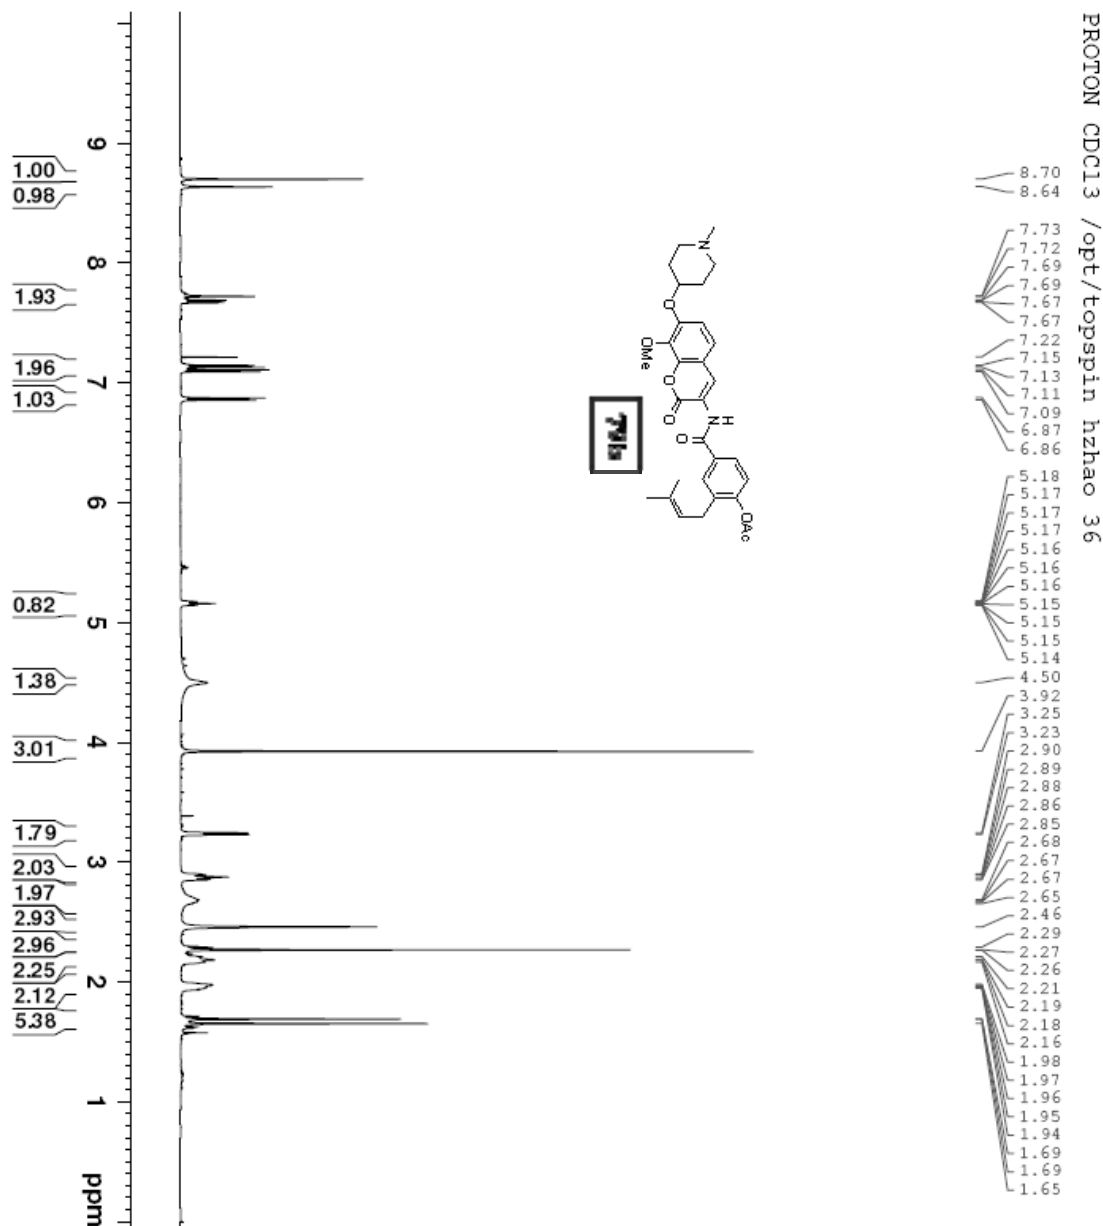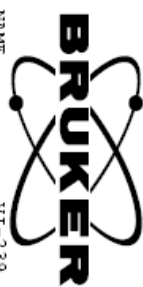

```

NAME          VI-239
EXENNO       1
PROCNO       20090902
Date_        20.42
Time         spect
INSTRUM      5 mm CPDUL 13C
PROBHD       PULPROG
PULPROG      65536
TD           CDC13
SOLVENT      16
NS           2
DS           10330.578 HZ
SMH          0.157632 HZ
FIDRES       3.1719923 sec
AQ           48.400 usec
RG           645
DW           6.50 usec
DE           298.2 K
TE           1.00000000 sec
D1           1
ID0          1

===== CHANNEL f1 =====
NUC1         1H
P1           15.00 usec
PL1         6.00 dB
PL1M        8.64411545 W
SFO1        500.1930889 MHz
SI          32768
SF          500.1900262 MHz
WDW         EM
SSB         0
SGB         0.30 Hz
GB          0
PC          1.00
    
```

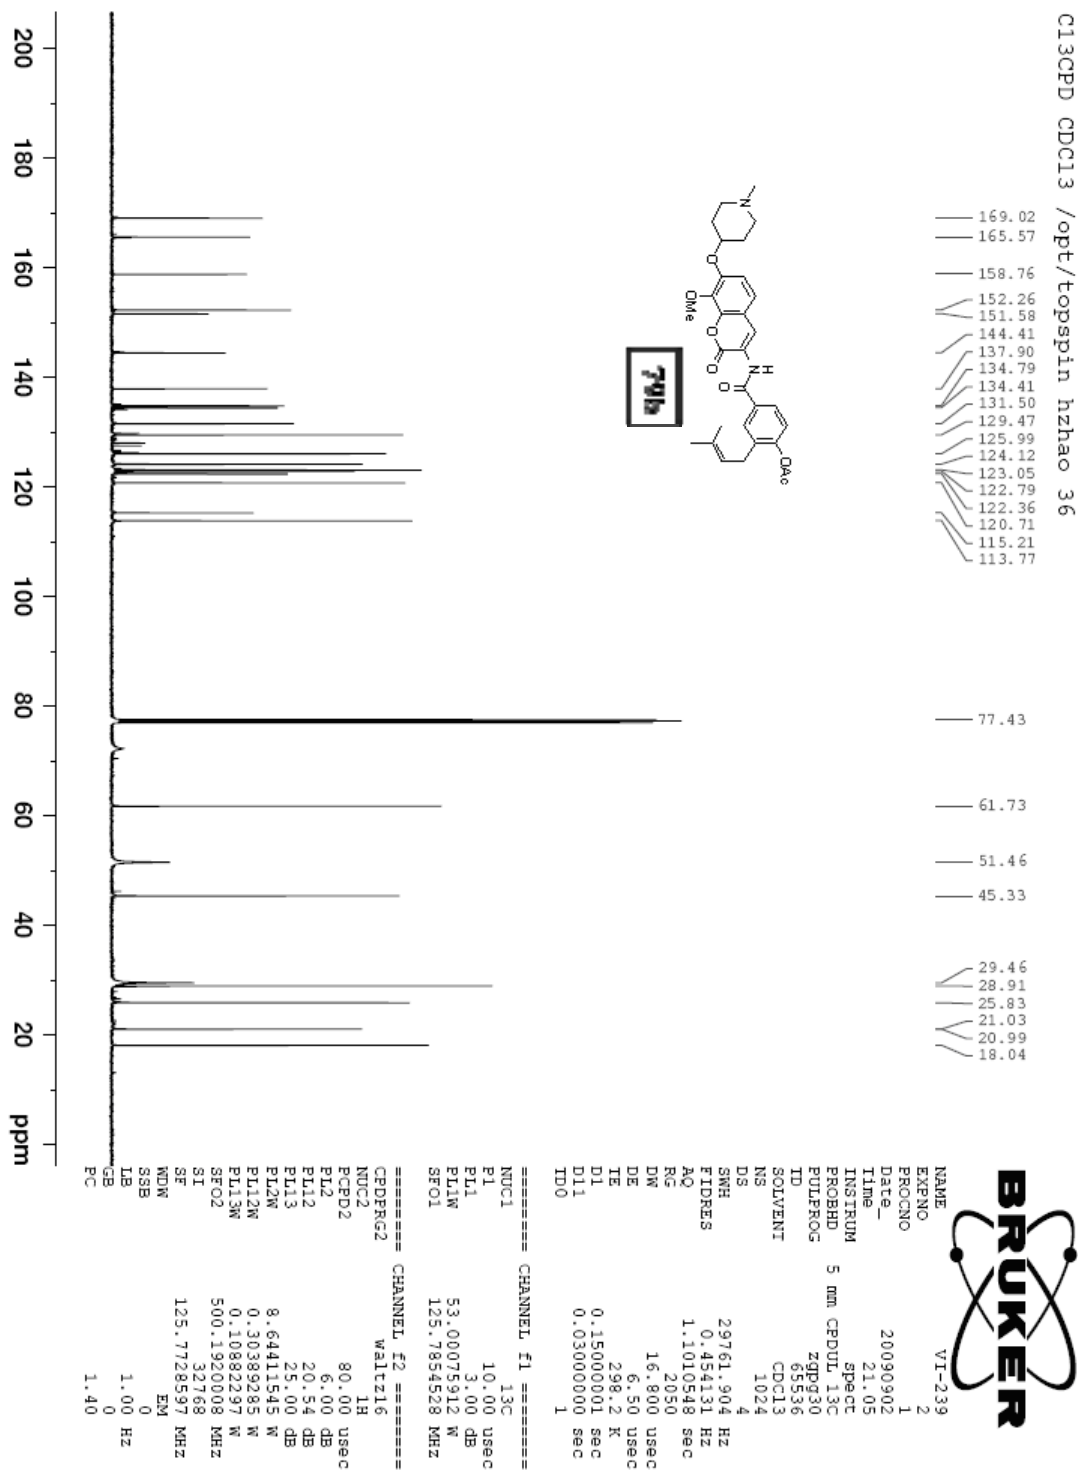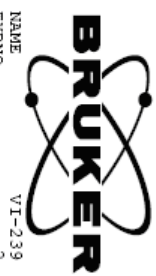

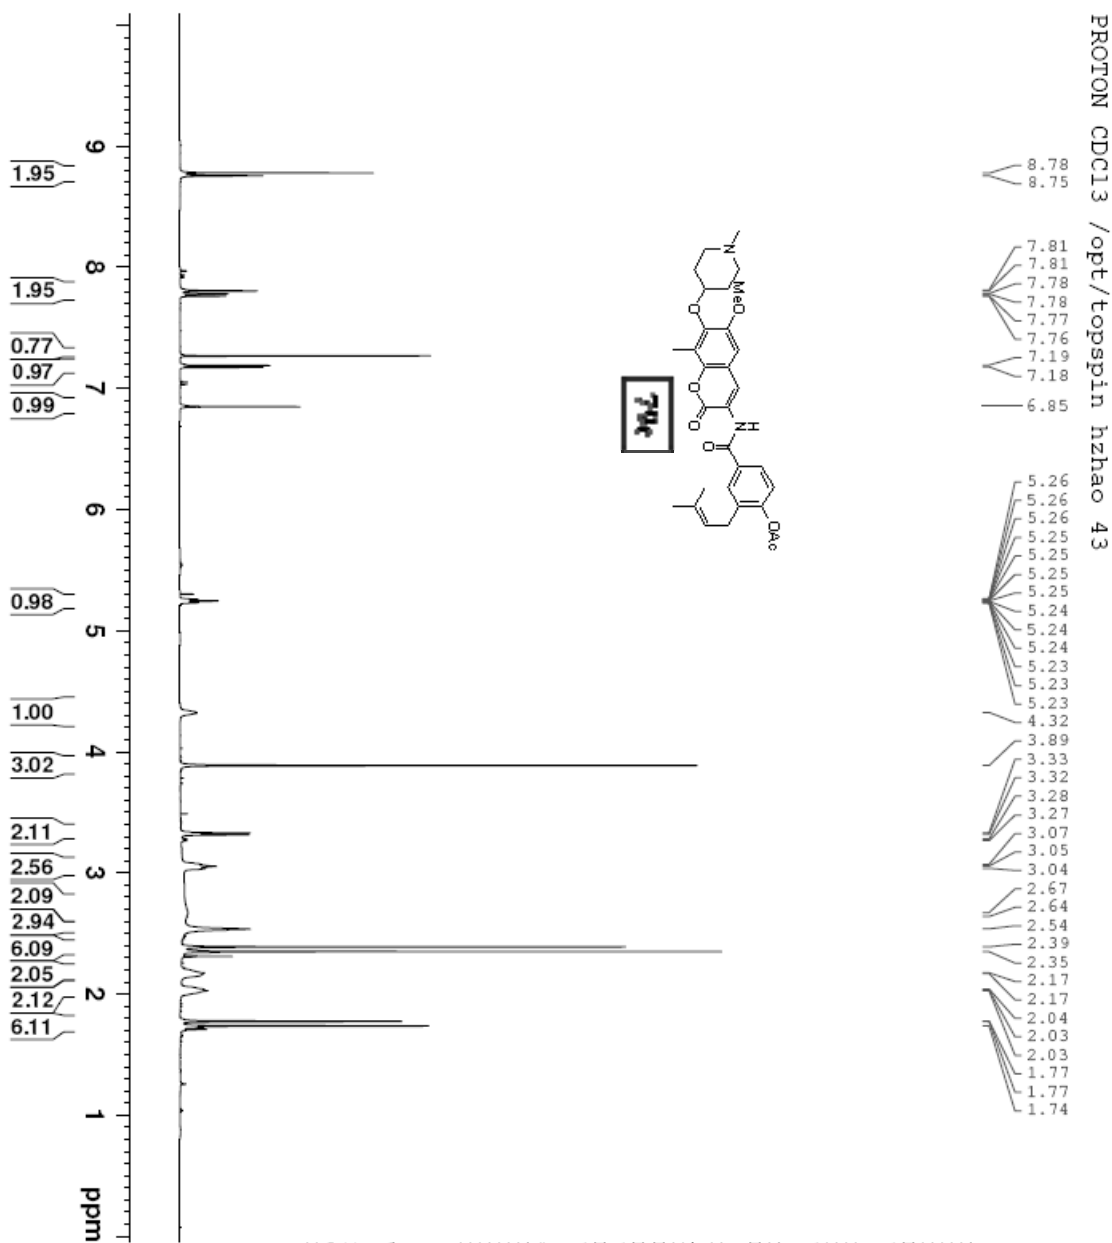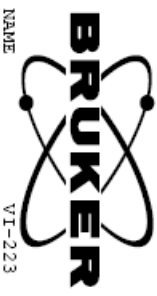

```

NAME          VI-223
EXPNO         1
PROCNO        1
Date_         20090827
Time_         14.04
INSTRUM       5 mm CPDUL 13C
PROBHD        ZG30
PULPROG       zgpg30
ID            65536
SOLVENT       CDCl3
NS            16
DS            2
SWH           10330.578 Hz
FIDRES        0.157632 Hz
AQ            3.171923 sec
RG            2050
DW            48.400 usec
DE            6.50 usec
TE            298.2 K
D1            1.00000000 sec
TD0           1

===== CHANNEL f1 =====
NUC1          1H
P1            15.00 usec
PL1           6.00 dB
PL1W          8.64411545 W
SFO1          500.1300889 MHz
SI            32768
SF            500.1300889 MHz
WDW           EM
SSB           0
LB            0.30 Hz
GB            0
PC            1.00
    
```

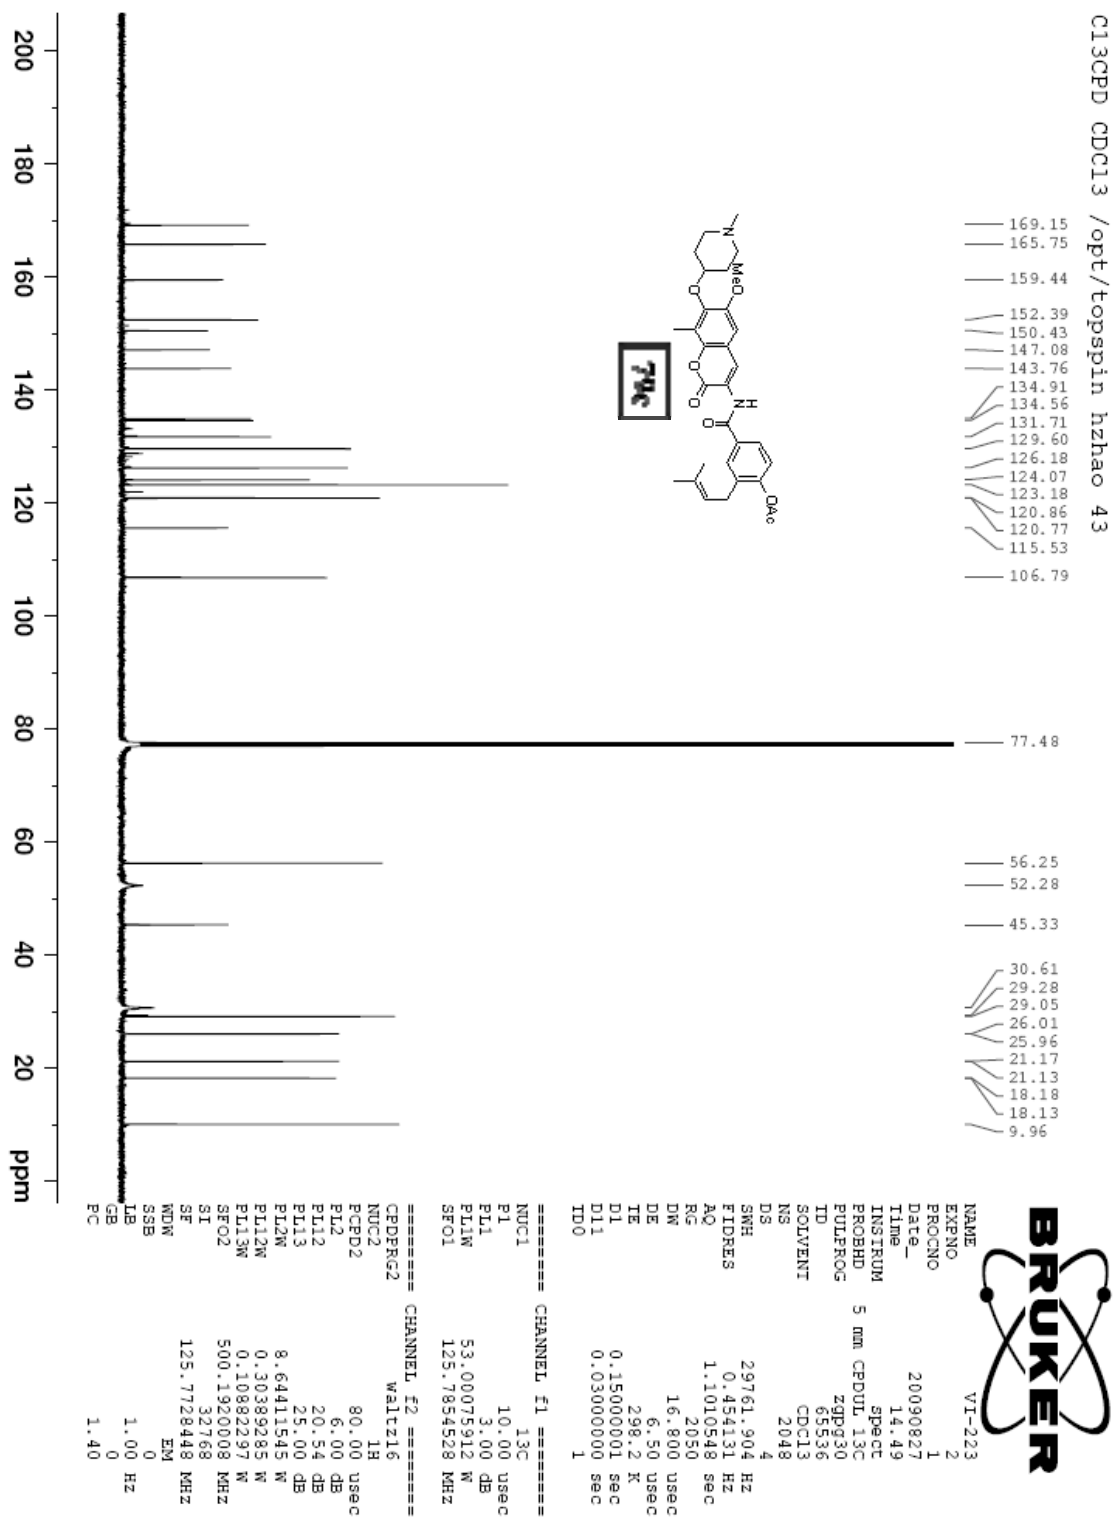



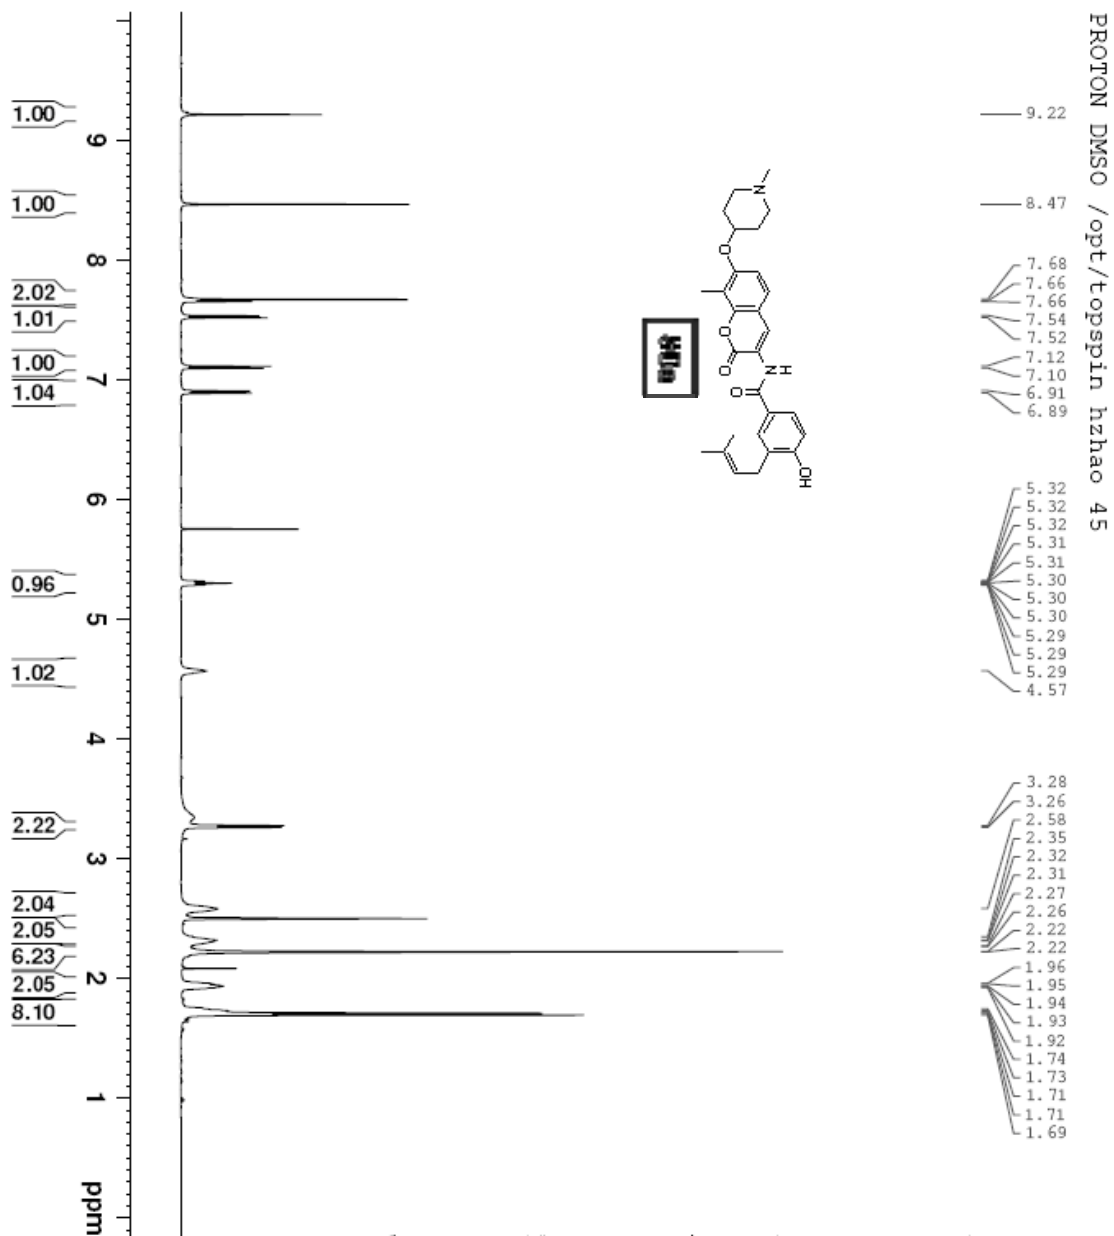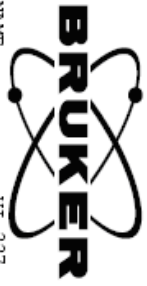

```

NAME          VI-227
EXPNO         1
PROCNO        1
Date_         20090827
Time          15.43
INSTRUM       spect
PROBHD        5 mm CPDUL 13C
PULPROG       zgpg30
TD            65536
SOLVENT       DMSO
NS            16
DS            2
SMF           10330.578 Hz
FIDRES        0.157632 Hz
AQ            3.1719923 sec
RG            1820
DM            48.400 usec
DE            6.50 usec
TE            298.2 K
D1            1.00000000 sec
TD0           1

===== CHANNEL f1 =====
NUC1          1H
P1            15.00 usec
PL1           6.00 dB
PL1W          8.64411545 W
SFO1          500.1930889 MHz
SI            32768
SF            500.1900000 MHz
WDW            EM
SSB            0
LB            0.30 Hz
GB            0
PC            1.00
    
```

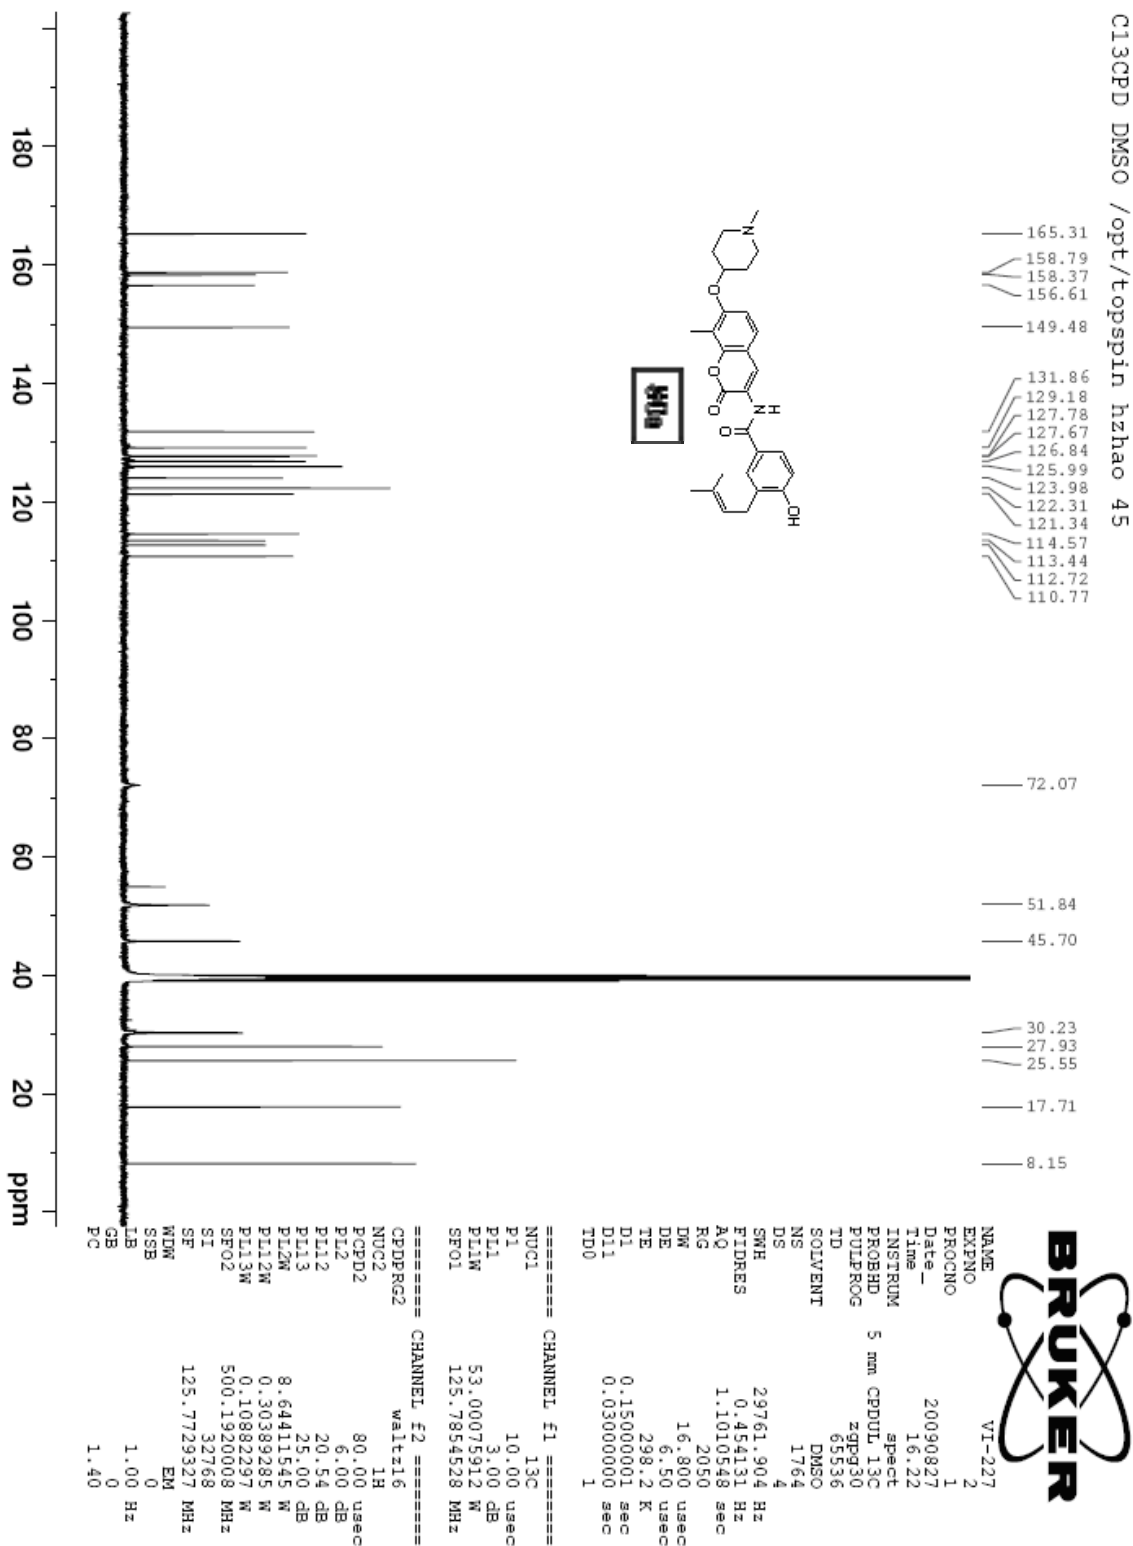

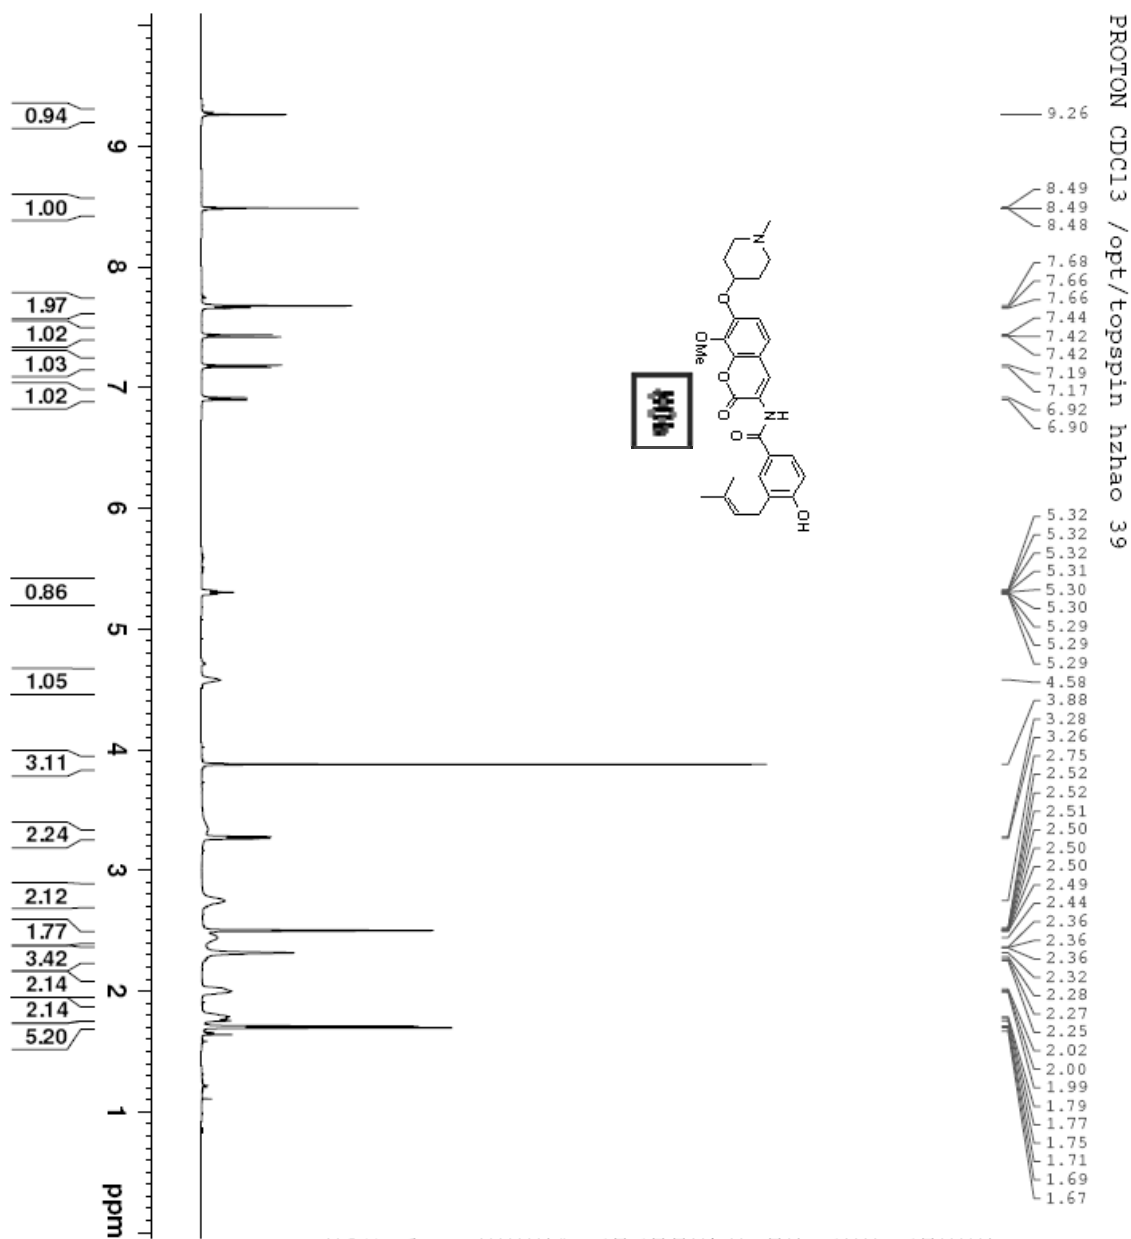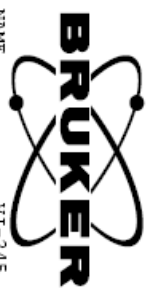

```

NAME VI-245
EXPNO 1
PROCNO 1
Date_ 20090902
Time 22.02
INSTRUM spect
PROBHD 5 mm CPDUL 13C
PULPROG zg30
TD 65536
FIDRES 0.157632 Hz
AQ 3.171923 sec
RG 2050
DW 48.400 usec
DE 6.50 usec
TE 298.3 K
D1 1.00000000 sec
ID0 1

===== CHANNEL f1 =====
NUC1 1H
P1 15.00 usec
PL1 6.00 dB
PL1W 8.64411545 W
SFO1 500.1930889 MHz
SI 32768
SF 500.1923713 MHz
WDW EM
SSB 0
GB 0
PC 1.00
    
```

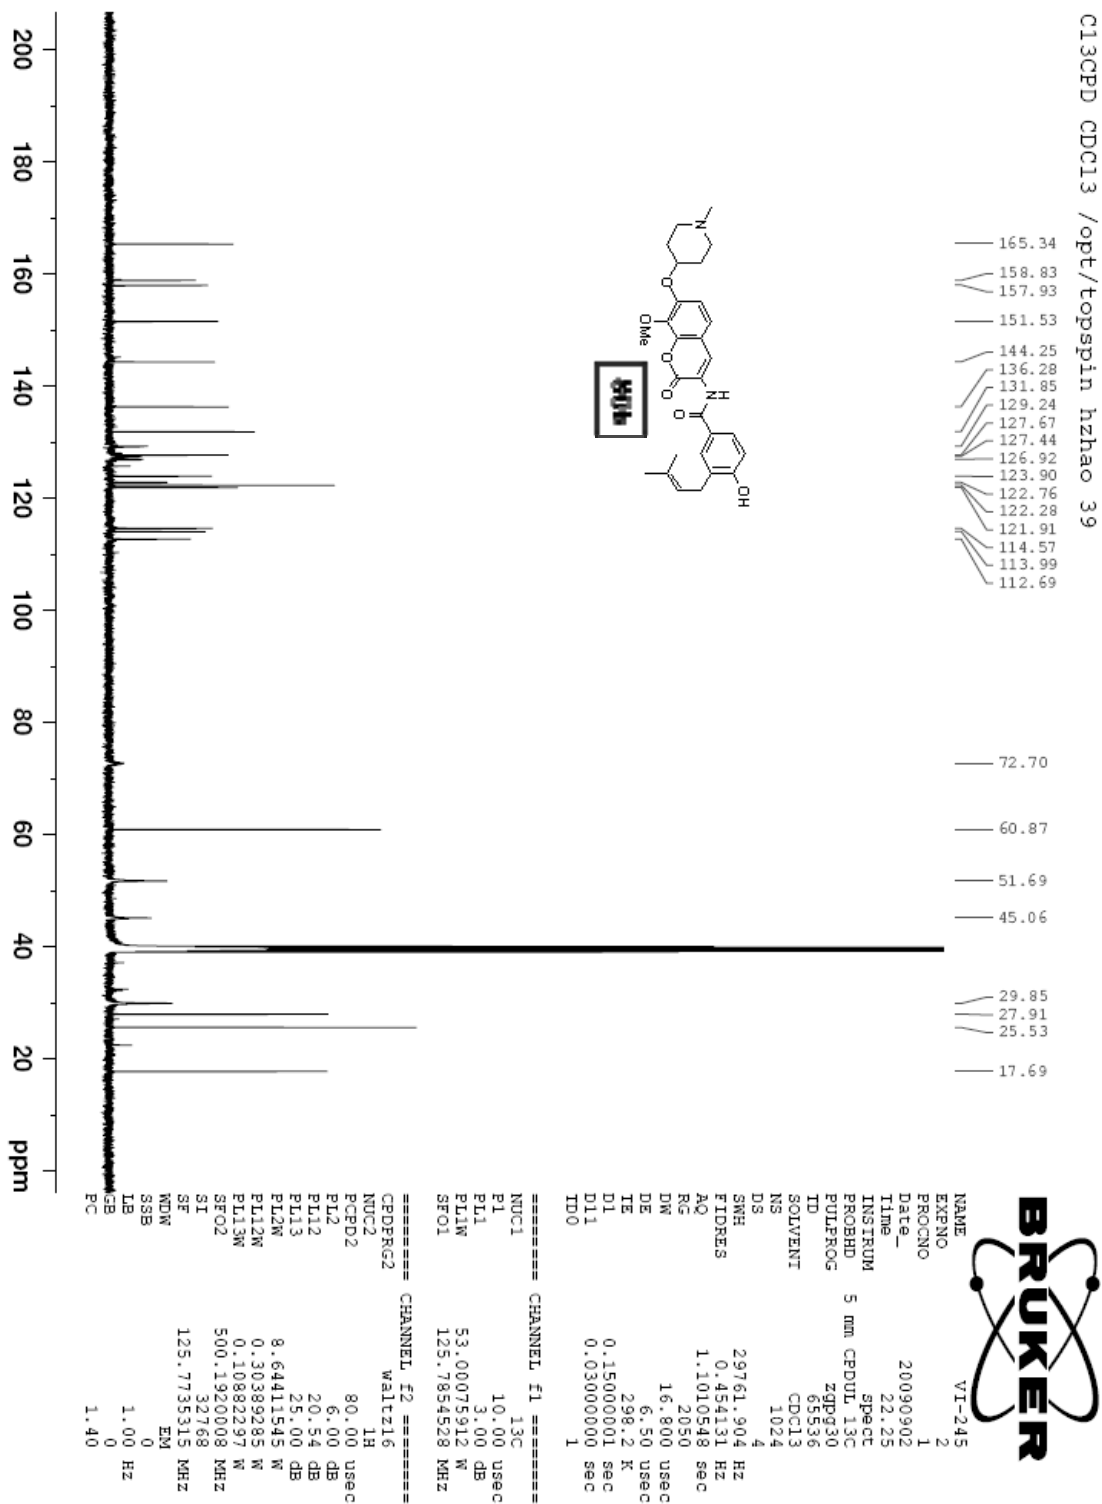

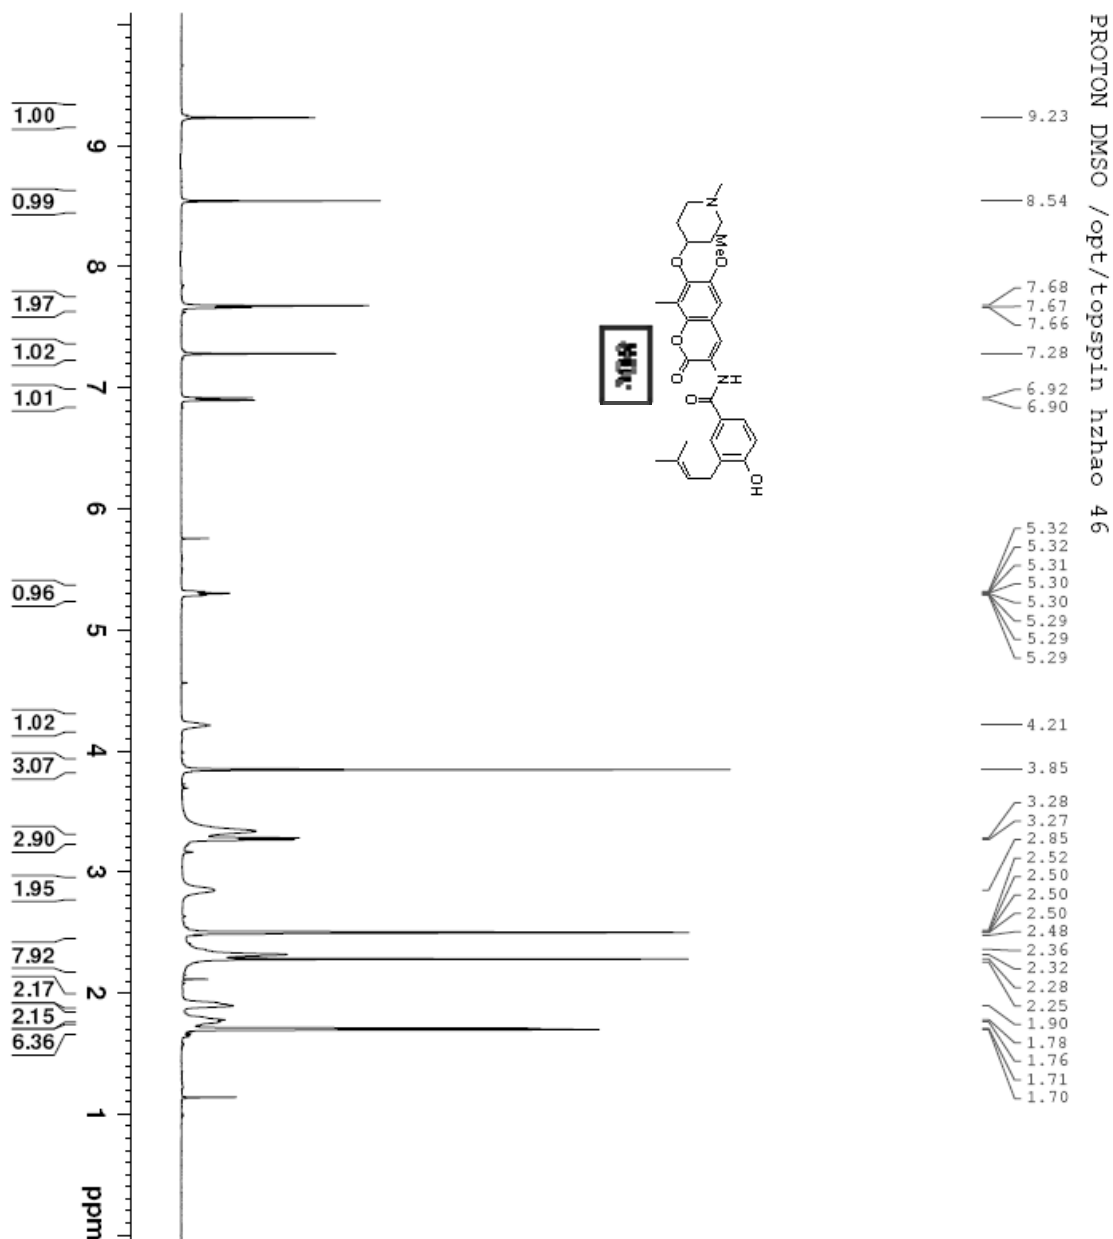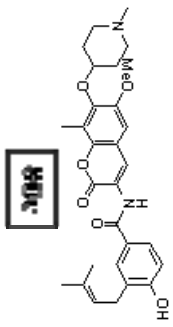

NAME VI-229  
 EXNO 1  
 PROCNO 1  
 Date\_ 20090827  
 Time 16.26  
 INSTRUM spect  
 PROBRD 5 mm CPDUL 13C  
 PULPROG zgpg30  
 ID 2930  
 F5536  
 SOLVENT DMSO  
 NS 16  
 DS 2  
 SWH 10330.578 Hz  
 FIDRES 0.157632 Hz  
 AQ 3.171923 sec  
 RG 2050  
 DW 48.400 usec  
 DE 6.50 usec  
 TE 298.2 K  
 D1 1.00000000 sec  
 ID0 1

===== CHANNEL f1 =====  
 NUC1 1H  
 P1 15.00 usec  
 PL 6.00 dB  
 PL1W 8.6441545 W  
 SFO1 500.1930889 MHz  
 SI 32768  
 SF 500.1900003 MHz  
 WDW EM  
 SSB 0  
 LB 0.30 Hz  
 GB 0  
 PC 1.00

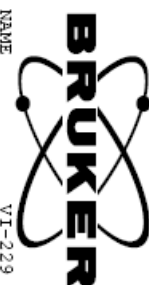

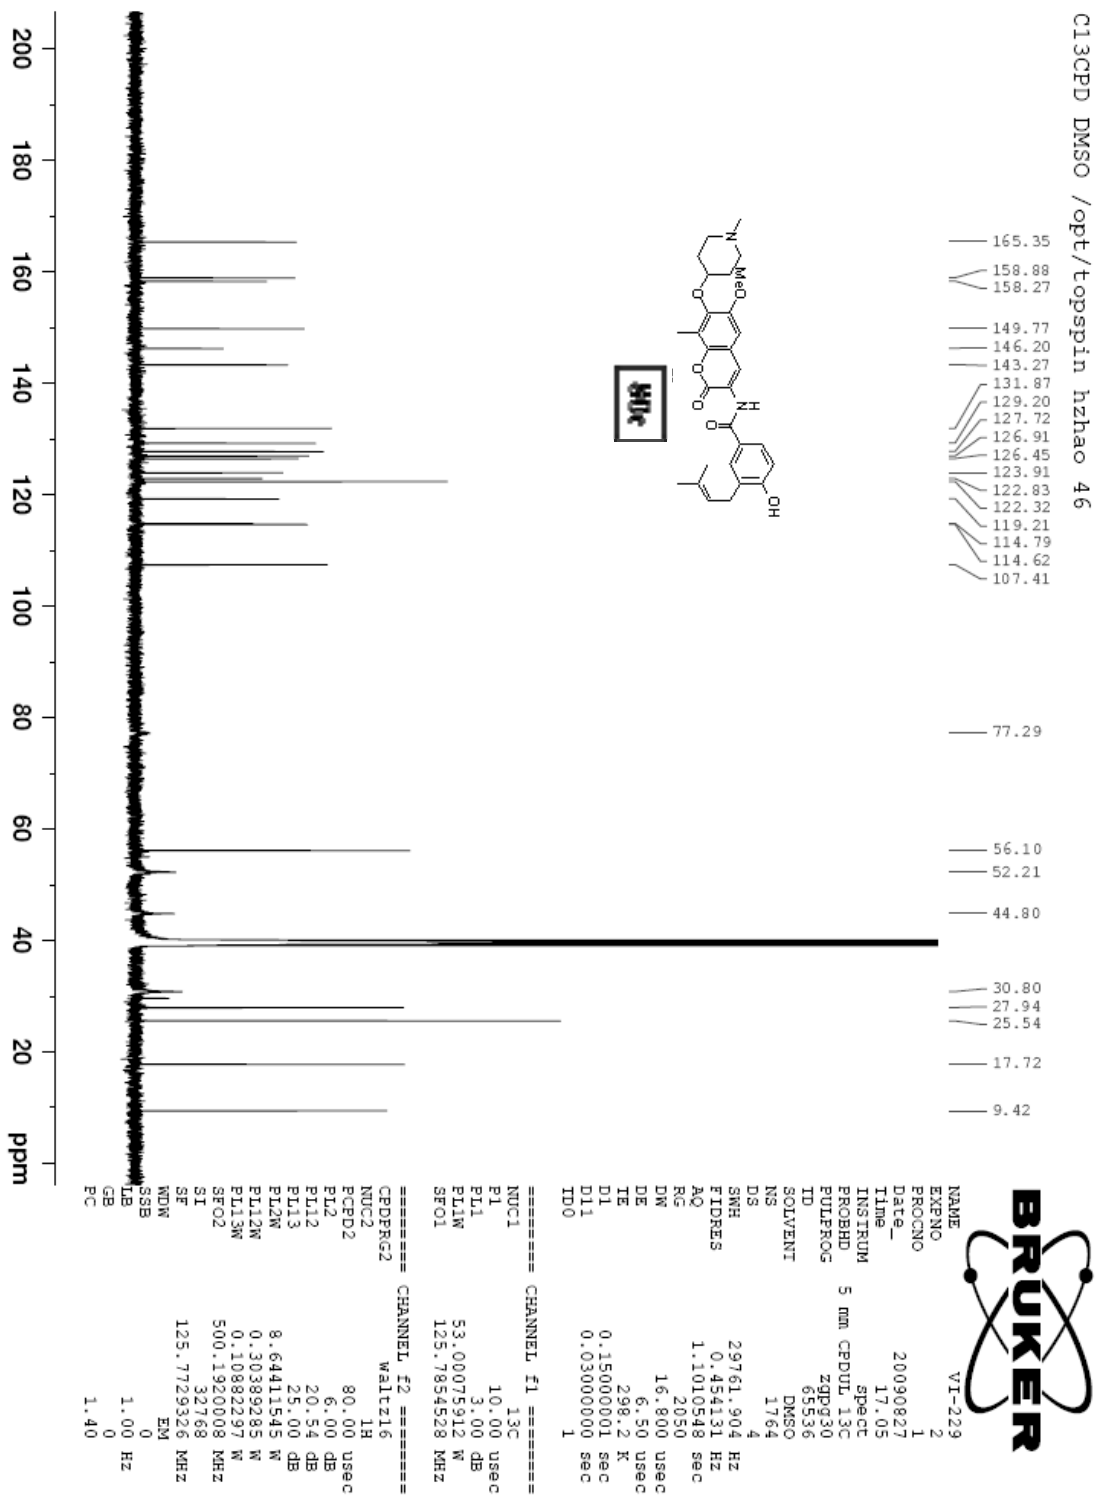

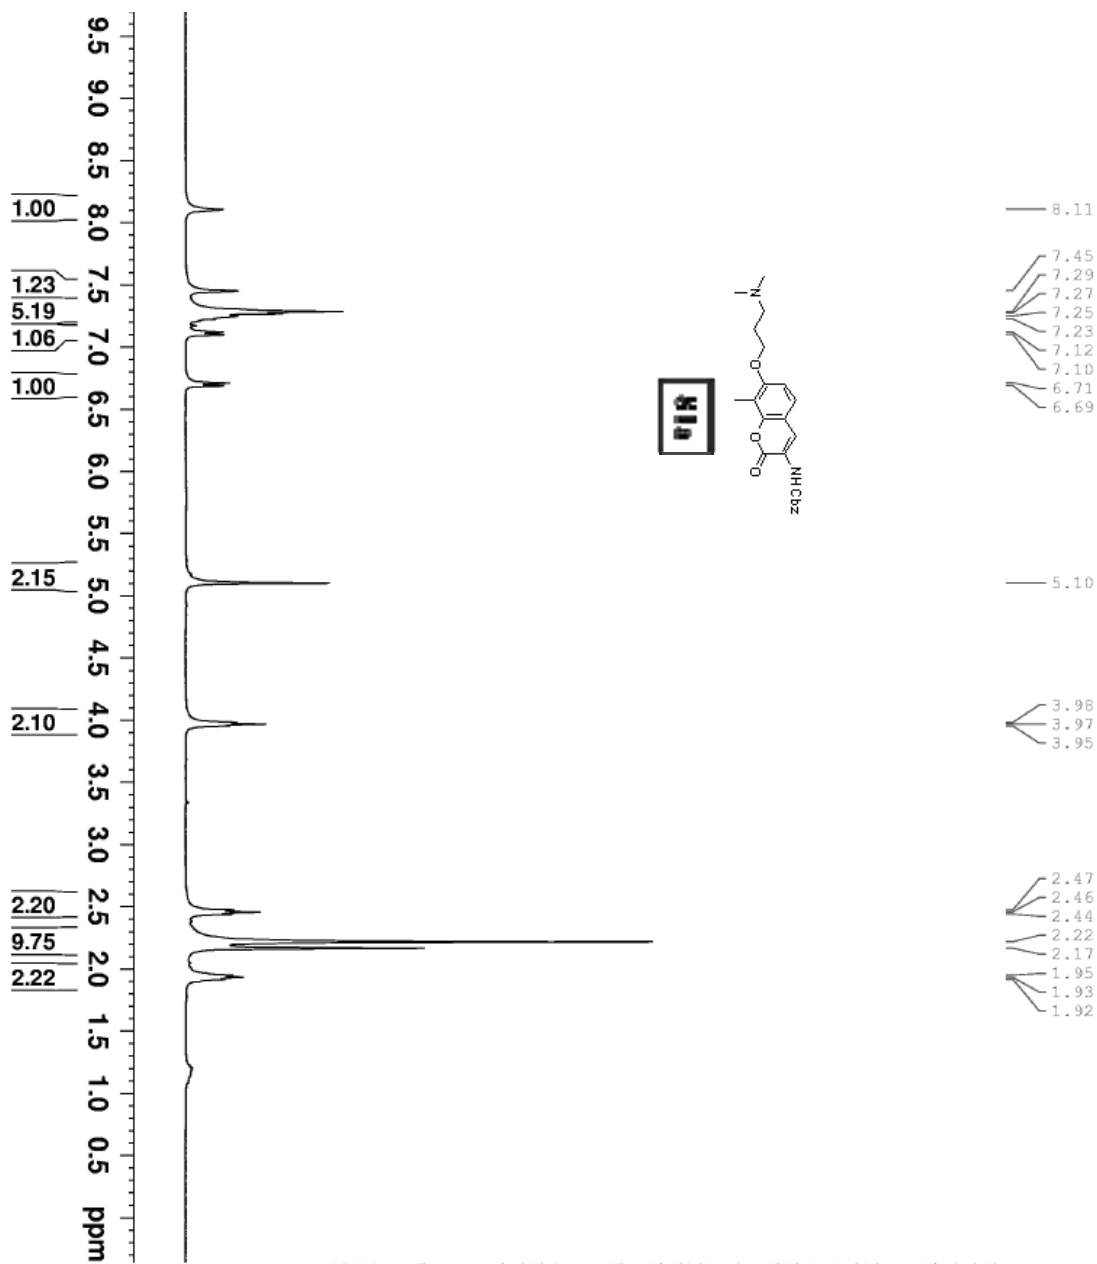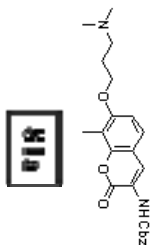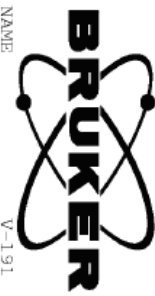

```

NAME V-191
EXPNO 1
PROCNO 1
Date_ 20090408
Time 19.30
INSTRUM dtx400
PROBHD 5 mm QNP 1H/13
PULPROG zg30
TD 65536
SOLVENT CDCl3
NS 16
DS 2
SWH 8278.146 Hz
FIDRES 0.126314 Hz
AQ 3.9584243 sec
RG 4
DE 60.400 usec
TE 294.2 K
D1 1.00000000 sec
TD0 1

===== CHANNEL f1 =====
NUC1 1H
P1 10.50 usec
PL1 -5.00 dB
SFO1 400.1324710 MHz
SI 32768
SF 400.1300449 MHz
WDW EM
SSB 0
LB 0.30 Hz
GB 0
PC 1.00
    
```

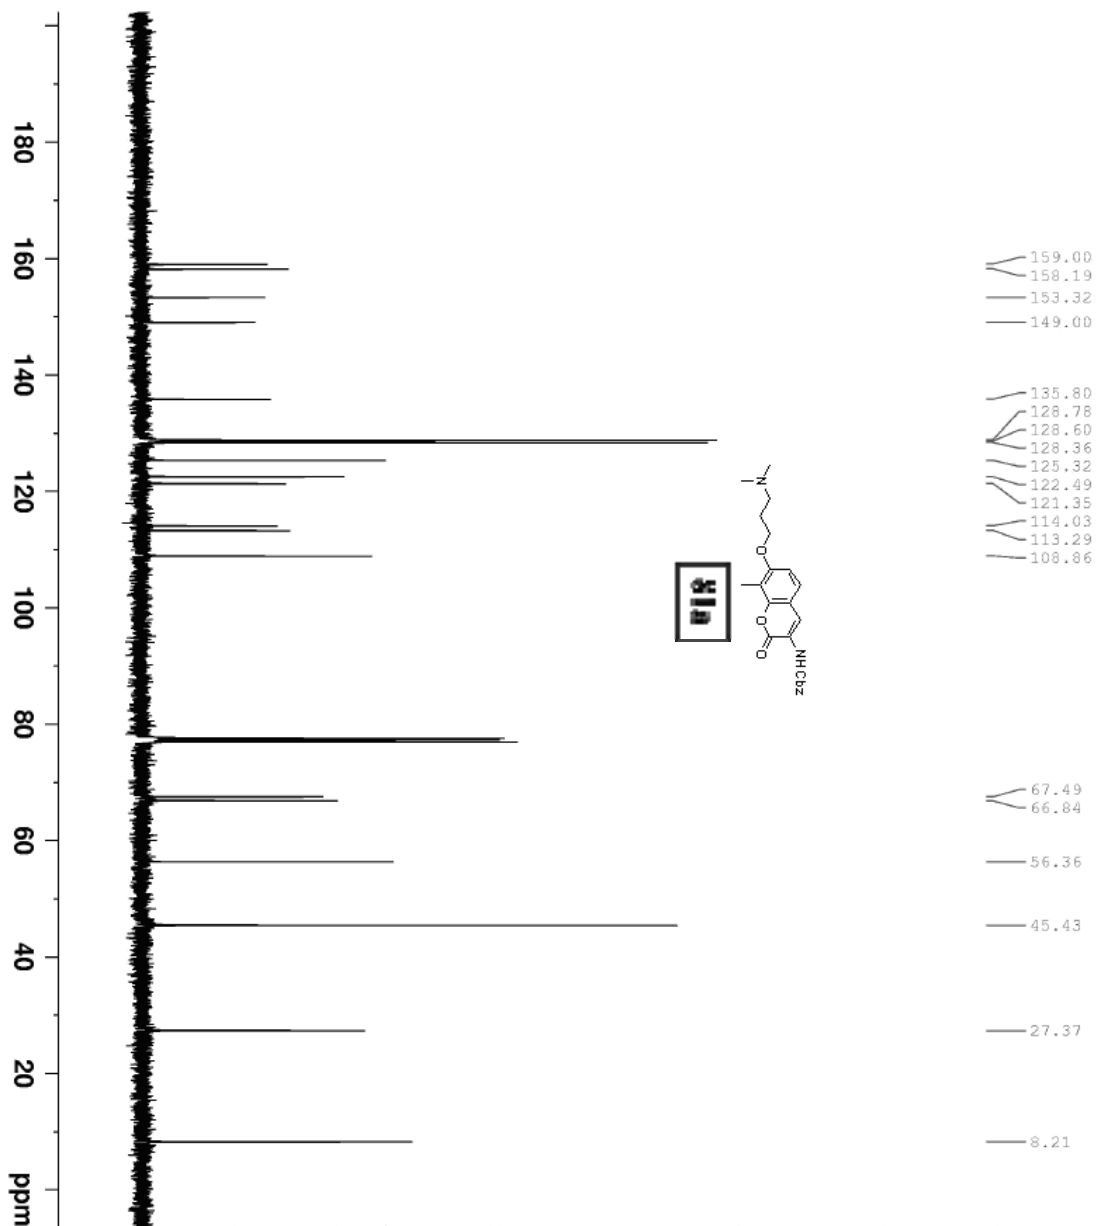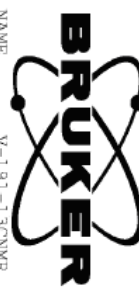

```

NAME          V-191-13CNMR
EXPNO         1
PROCNO        1
Date_         20090408
Time          19:37
INSTRUM       5 mm QNP 1H/13
PROBHD        dtk400
PULPROG       zgpg30
TD            65536
SOLVENT       CDCl3
NS            114
DS            4
SWH           23980.814 Hz
FIDRES        0.365918 Hz
AQ            1.3664756 sec
RG            32768
DW            20.850 usec
DE            6.00 usec
TE            294.4 K
D1            2.0000000 sec
d11           0.0300000 sec
DELTA         1.89999998 sec
TD0           1
    
```

```

===== CHANNEL f1 =====
NUC1          13C
P1            9.85 usec
PL1           -2.00 dB
SFO1         100.6228298 MHz
    
```

```

===== CHANNEL f2 =====
CPDPRG2      waltz16
NUC2          1H
PCPD2        100.00 usec
PL2           -5.00 dB
PL12         14.58 dB
PL13         16.00 dB
SFO2         400.1316005 MHz
SI            32768
SF           100.6127562 MHz
WDW           EM
SSB           0
LB            1.00 Hz
GB            0
PC            1.40
    
```



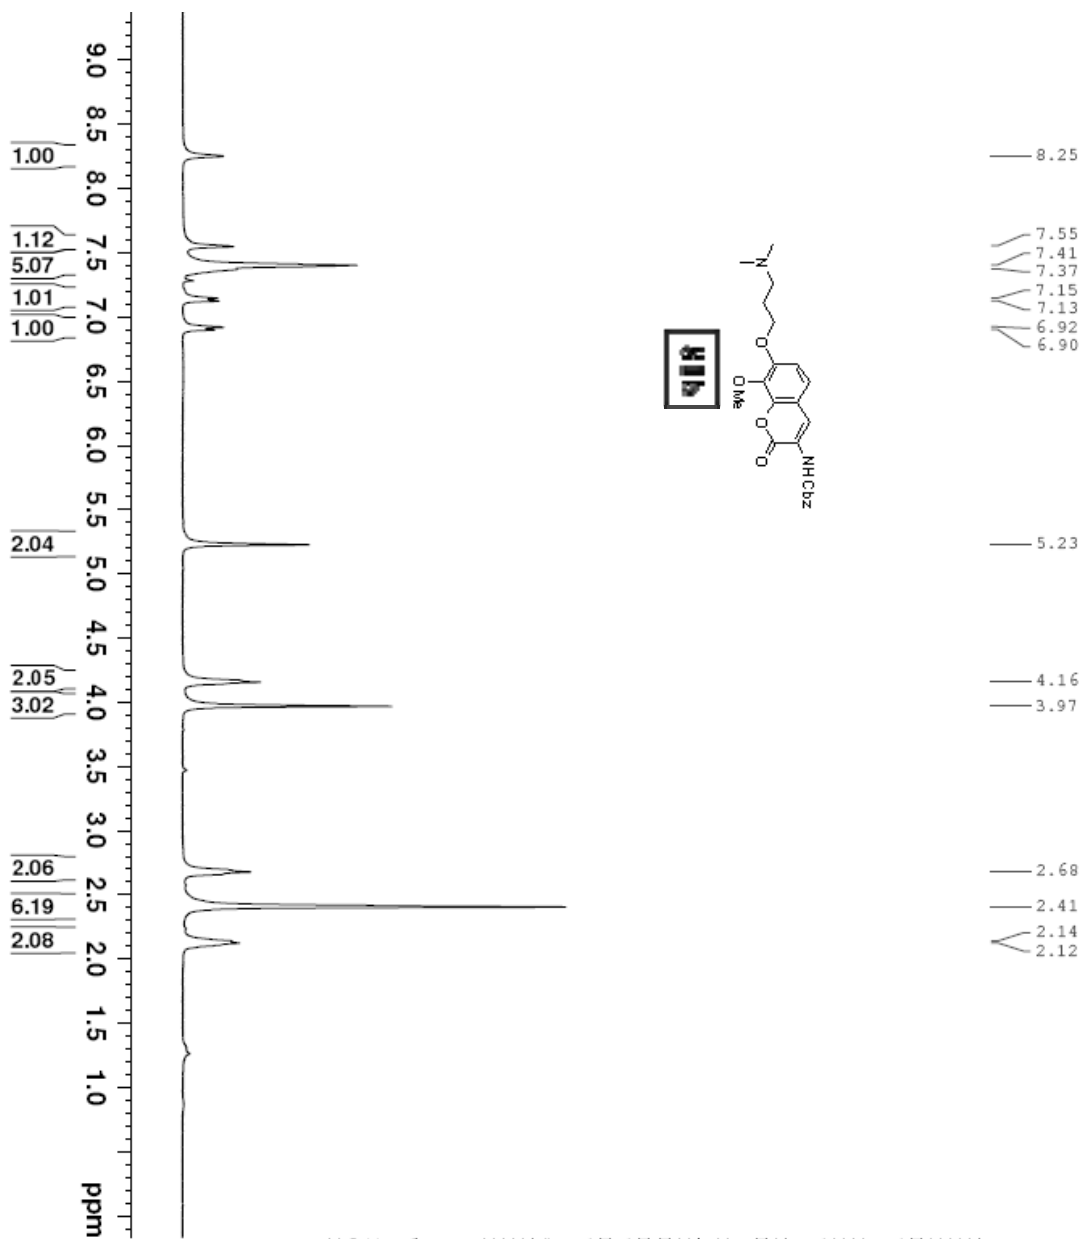

**BRUKER**

V-209-AC

NAME  
EXPNO 1  
PROCNO 1  
Date\_ 20090415  
Time 21.01  
INSTRUM dx400  
PROBHD 5 mm QNP 1H/13  
PULPROG zg30  
TD 65536  
SOLVENT CDCl3  
NS 16  
DS 2  
SWH 8278.146 HZ  
FIDRES 0.126314 HZ  
AQ 3.9584243 sec  
RG 4  
DW 60.400 usec  
DE 6.00 usec  
TE 294.4 K  
D1 1.00000000 sec  
TD0 1

==== CHANNEL f1 =====  
NUC1 1H  
P1 10.50 usec  
PL1 -5.00 dB  
SFO1 400.1324710 MHz  
SI 32768  
SF 400.1300000 MHz  
WDW EM  
SSB 0  
LB 0.30 HZ  
GB 0  
PC 1.00

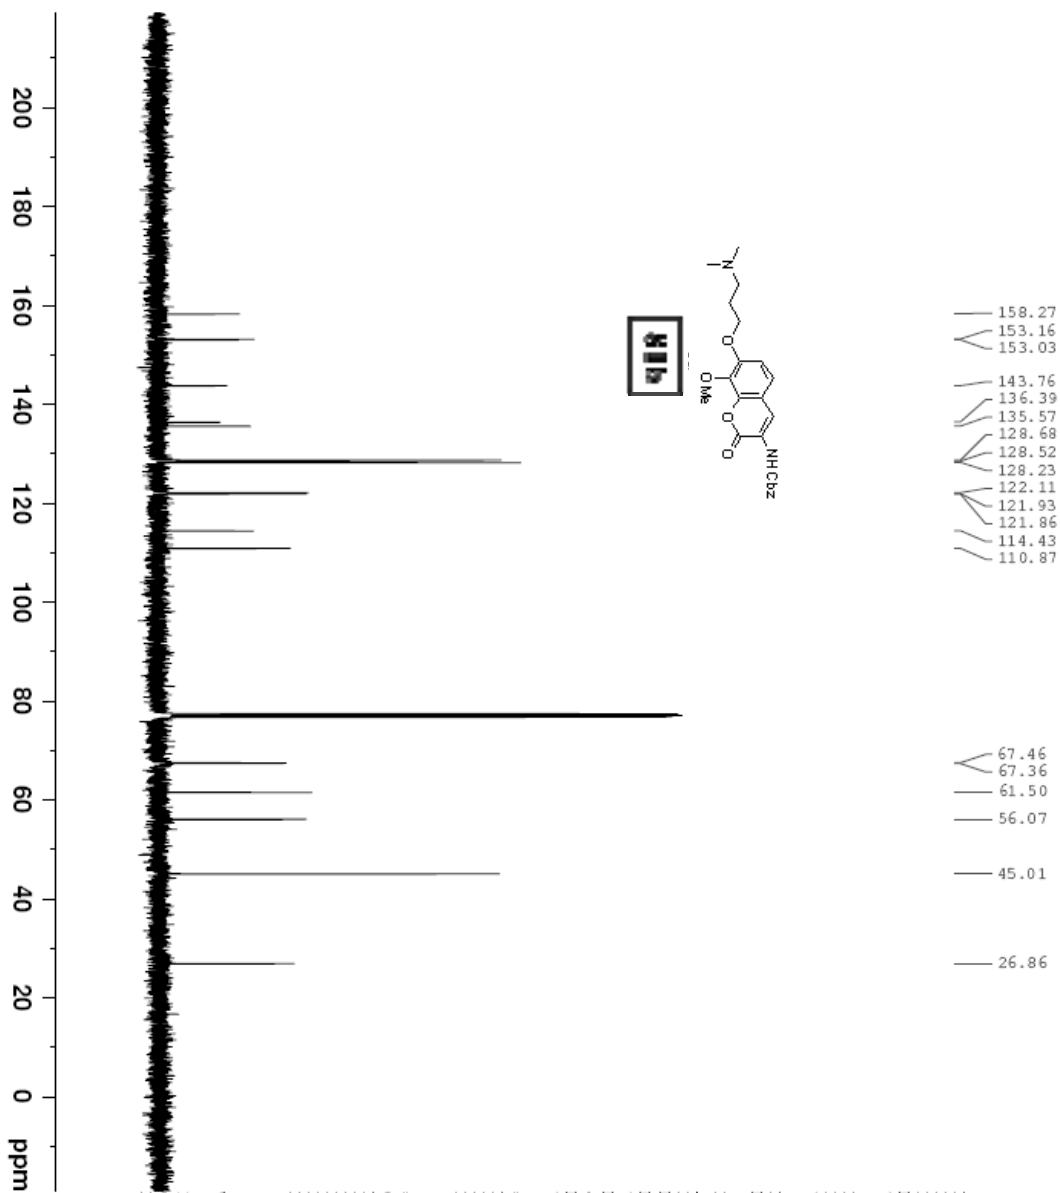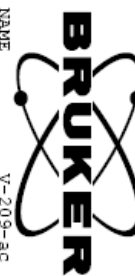

```

NAME          V-209-ac
EXPNO         1
PROCNO        1
Date_         20090415
Time_         20.53
INSTRUM       dirx400
PROBHD        5 mm QNP 1H/13
PULPROG       zgpg30
TD            65536
F2            400.1316005
SOLVENT       CDCl3
NS            145
DS            4
SWH           23980.814 Hz
FIDRES        0.365918 Hz
AQ            1.3664756 sec
RG            32768
DM            20.850 usec
DE            6.00 usec
TE            294.4 K
D1            2.00000000 sec
d11           0.03000000 sec
DELTA         1.899999998 sec
TD0           2

===== CHANNEL f1 =====
NUC1          13C
P1            9.85 usec
PL1           -2.00 dB
SFO1         100.6228298 MHz

===== CHANNEL f2 =====
CPDPRG2      waltz16
NUC2          1H
PCPD2        100.00 usec
PL2          -5.00 dB
PL12         14.58 dB
PL13         16.00 dB
SFO2         400.1316005 MHz
SI           32768
SF           100.6127690 MHz
WDW           EM
SSB           0
LB           1.00 Hz
GB           0
PC           1.40
    
```

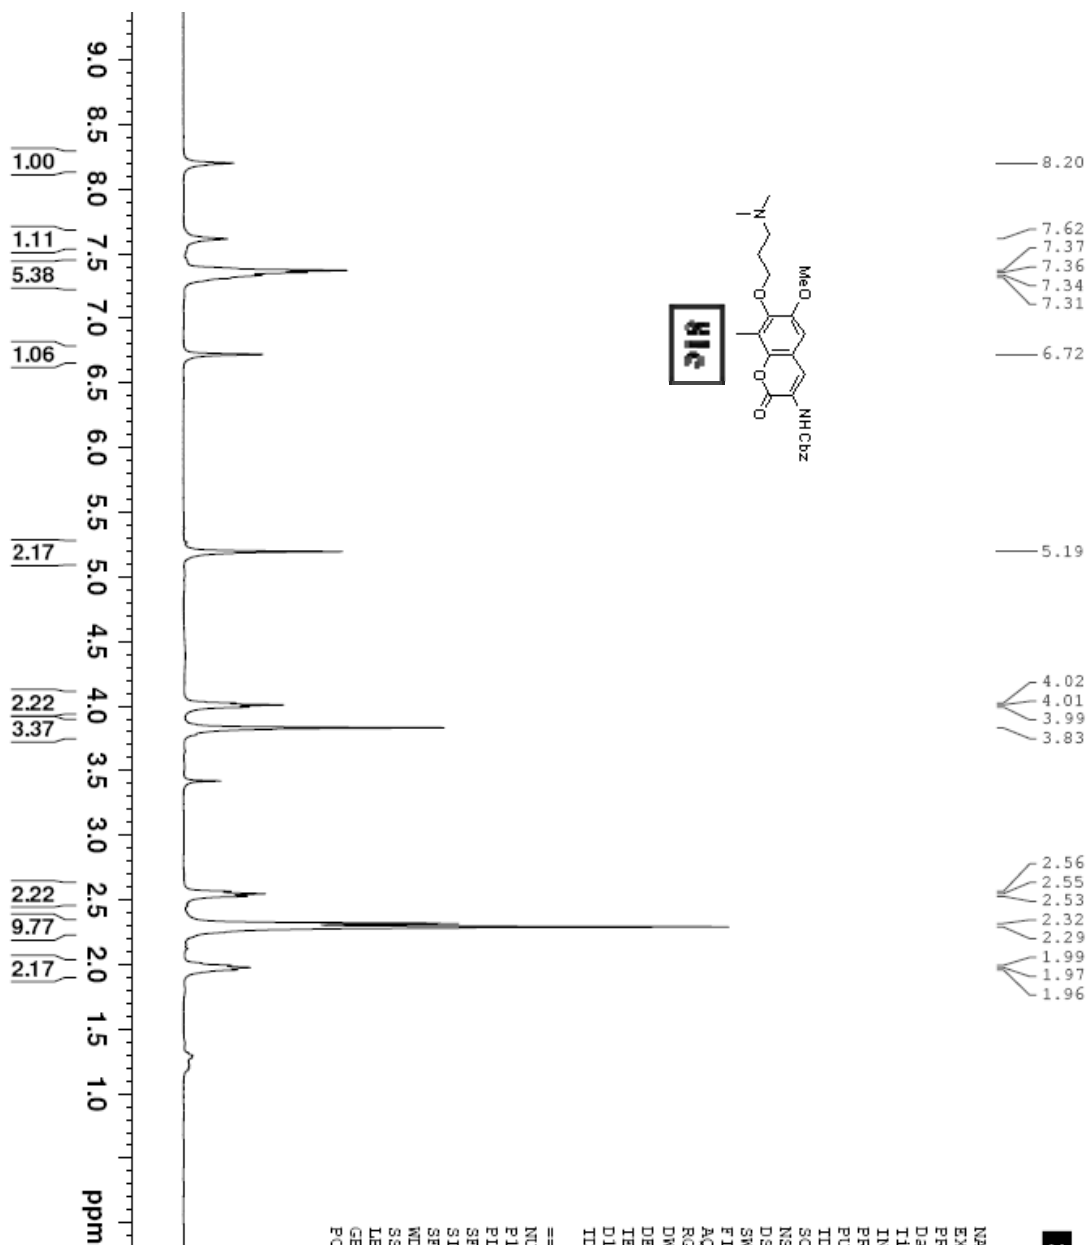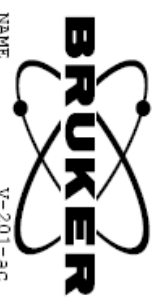

```

NAME          V-201-ac
EXPNO         1
PROCNO        1
Date_         20090414
Time         20.18
INSTRUM      dirx400
PROBHD       5 mm QNP 1H/13
PULPROG      zg30
TD           65536
SOLVENT      CDCl3
NS           16
DS           2
SWH          8278.146 HZ
FIDRES       0.126314 HZ
AQ           3.9584243 sec
RG           4
DM           60.400 usec
DE           6.00 usec
TE           294.3 K
D1           1.00000000 sec
TD0          1

===== CHANNEL f1 =====
NUC1          1H
P1           10.50 usec
PL1          -5.00 dB
SFO1         400.1324710 MHz
SI           32768
SF           400.1300000 MHz
WDW          EM
SSB          0
LB           0.30 HZ
GB           0
PC           1.00
    
```

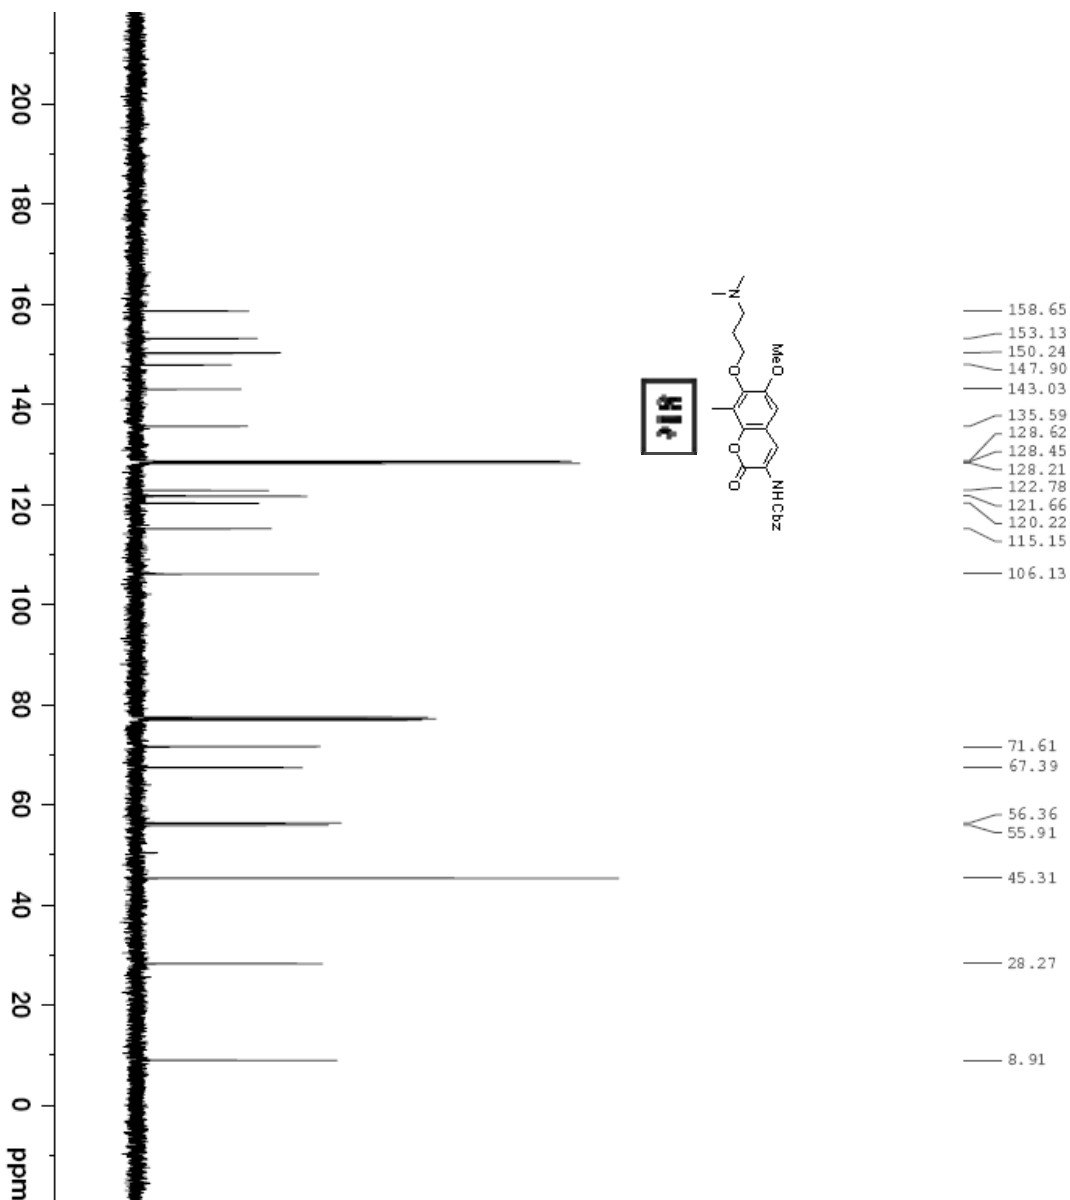

**BRUKER**

V-201-AG-13CNMR

NAME  
EXPNO 1  
PROCNO 1  
Date\_ 20090414  
Time\_ 20.23  
INSTRUM 5 mm QNP 1H/13  
PROBHD zgpg30  
PULPROG zgpg30  
TD 65536  
ID CDC13  
SOLVENT CDCl3  
NS 65  
DS 4  
SWH 23980.814 HZ  
FIDRES 0.365918 HZ  
AQ 1.3664756 sec  
RG 32768  
DW 20.850 usec  
DE 6.00 usec  
TE 294.4 K  
D1 2.00000000 sec  
d11 0.03000000 sec  
DELTA 1.89999998 sec  
TD0 2

==== CHANNEL f1 =====  
NUC1 13C  
P1 9.85 usec  
PL1 -2.00 dB  
SFO1 100.6228298 MHz

==== CHANNEL f2 =====  
CPDPRG2 waltz16  
NUC2 1H  
PCPD2 100.00 usec  
PL2 -5.00 dB  
PL12 14.58 dB  
PL13 16.00 dB  
SFO2 400.1316005 MHz  
SI 32768  
SF 100.6127690 MHz  
WDW EM  
SSB 0  
LB 1.00 HZ  
GB 0  
PC 1.40

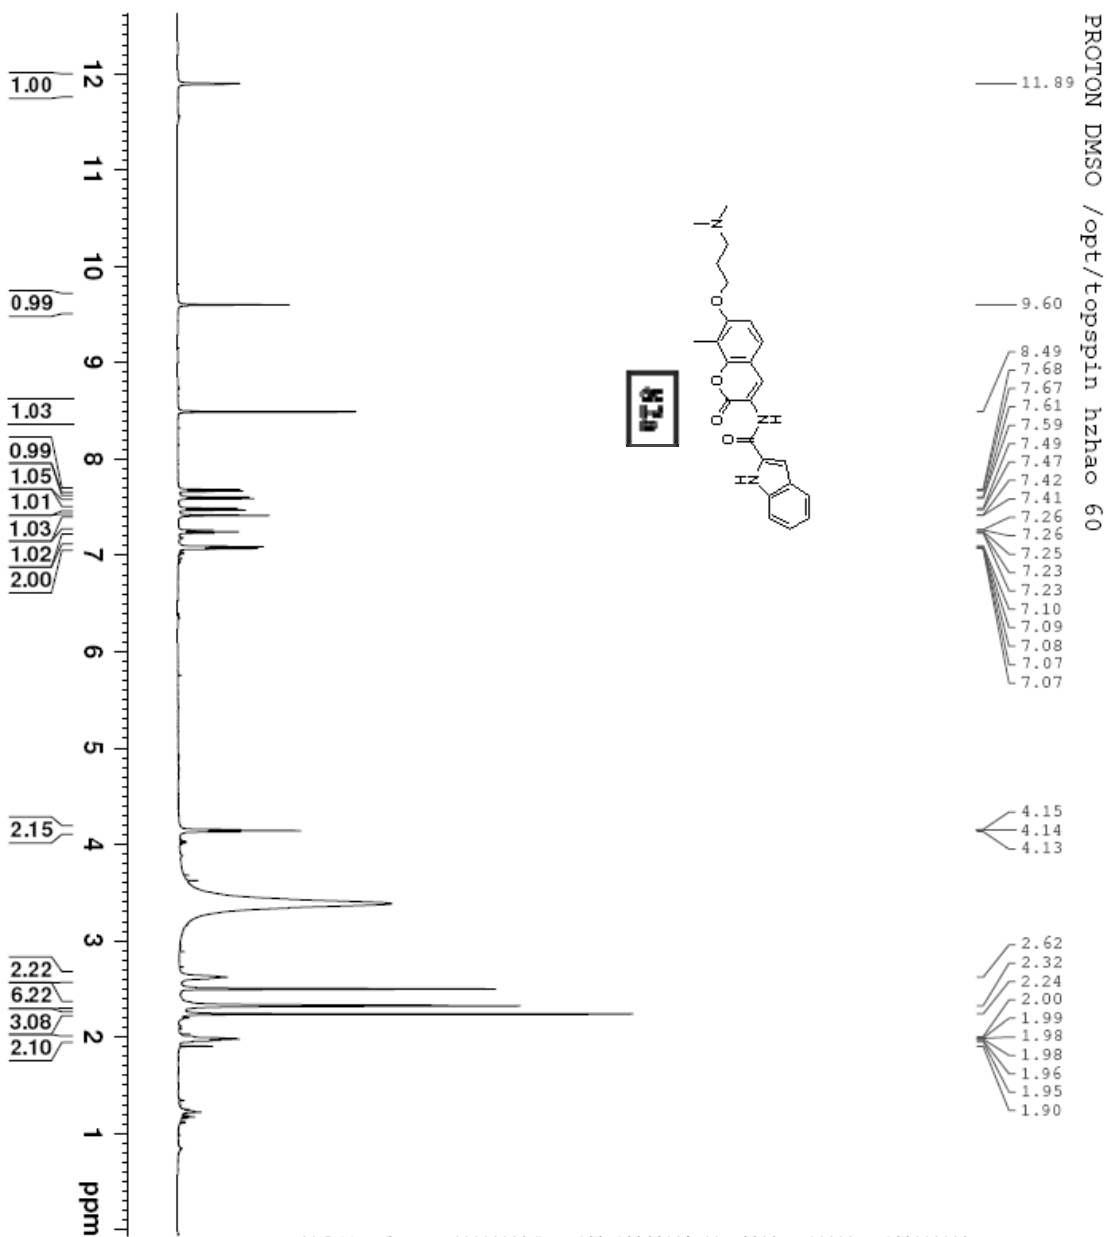

**BRUKER**

KU-370

|         |                |
|---------|----------------|
| NAME    | 1              |
| EXPNO   | 1              |
| PROCNO  | 1              |
| Date_   | 20090521       |
| Time_   | 0.04           |
| INSTRUM | spect          |
| PROBHD  | 5 mm CPDUL 13C |
| PULPROG | ZG30           |
| TD      | 65536          |
| SOLVENT | DMSO           |
| NS      | 16             |
| DS      | 2              |
| SWH     | 10330.578 Hz   |
| FTDRES  | 0.157632 Hz    |
| AQ      | 3.171923 sec   |
| RG      | 1620           |
| DW      | 48.400 usec    |
| DE      | 6.50 usec      |
| TE      | 298.2 K        |
| TD0     | 1.00000000 sec |
| ID0     | 1              |

==== CHANNEL f1 =====

|      |                 |
|------|-----------------|
| NUC1 | 1H              |
| P1   | 15.00 usec      |
| PL1  | 6.00 dB         |
| PL1W | 8.64411545 W    |
| SFO1 | 500.1930889 MHz |
| SI   | 32768           |
| SF   | 500.1900003 MHz |
| WDW  | EM              |
| SSB  | 0               |
| LB   | 0.30 Hz         |
| GB   | 0               |
| PC   | 1.00            |

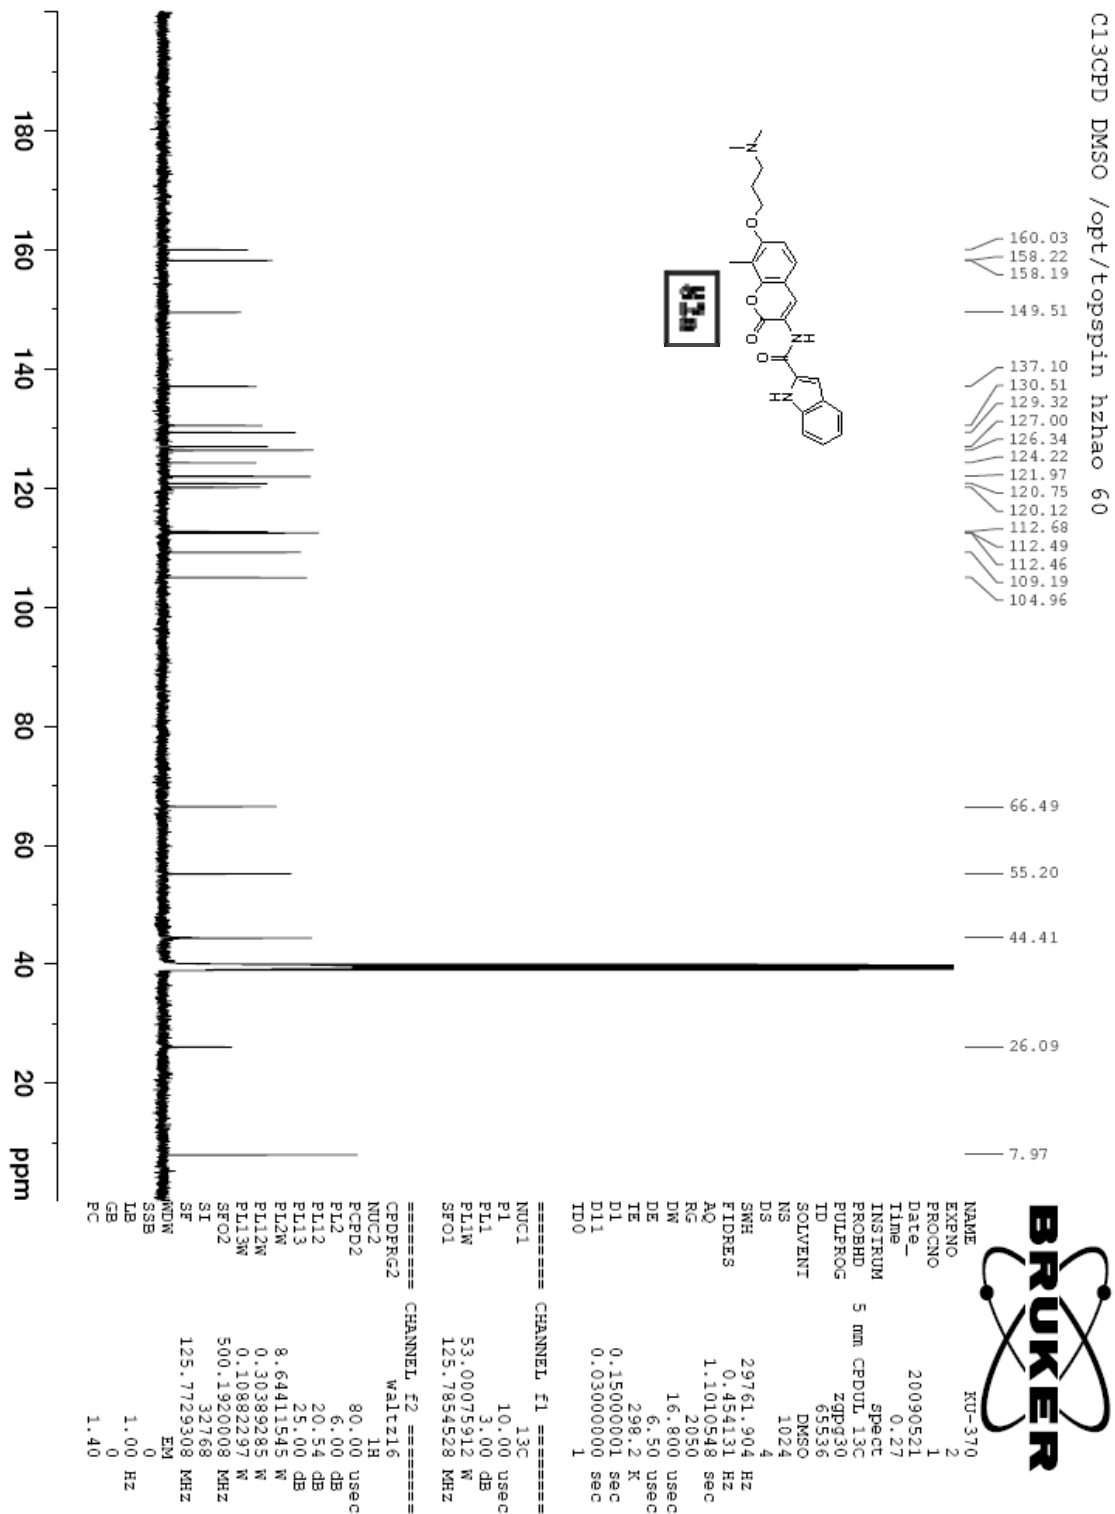

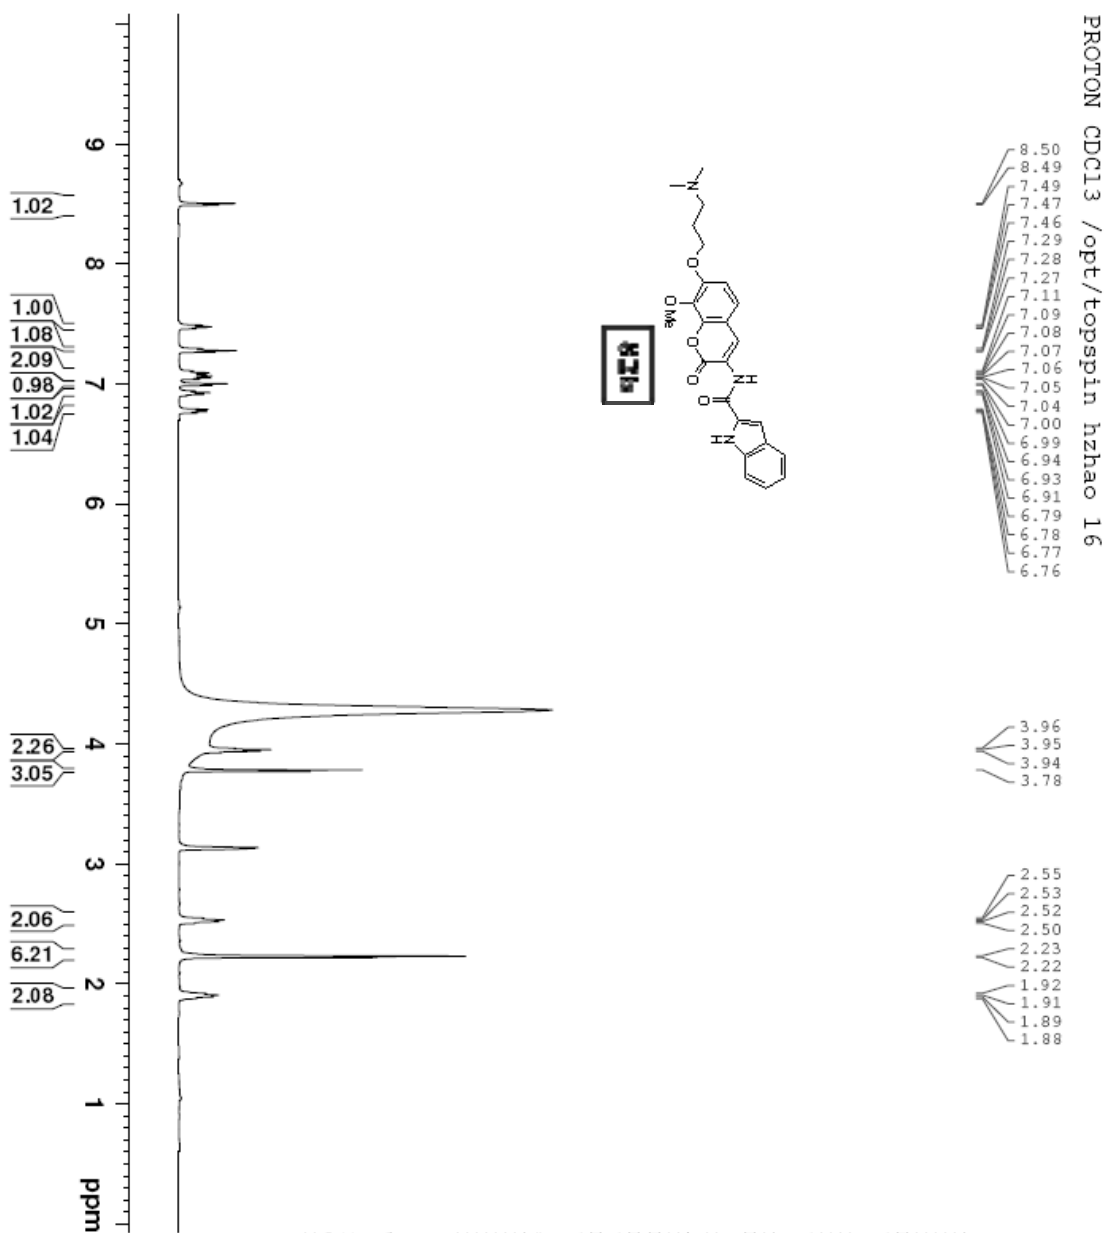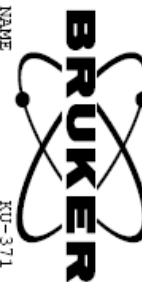

```

NAME          KU-371
EXPNO         1
PROCNO        1
Date_         20090512
Time_         15.53
INSTRUM       spect
PROBHD        5 mm CPDUI 13C
PULPROG       zg30
TD            65536
SOLVENT       CDCl3
NS            16
DS            2
SMH           10330.578 Hz
FIDRES        0.157632 Hz
AQ            3.1719923 sec
RG            912
DW            48.400 usec
DE            6.50 usec
TE            298.2 K
D1            1.000000000 sec
TD0           1

===== CHANNEL f1 =====
NUC1          1H
P1            15.00 usec
PL1           6.00 dB
PL1W          8.64411545 W
SFO1          500.1330889 MHz
SI            32768
SF            500.1320611 MHz
WDW           EM
SSB           0
LB            0.30 Hz
GB            0
PC            1.00
    
```

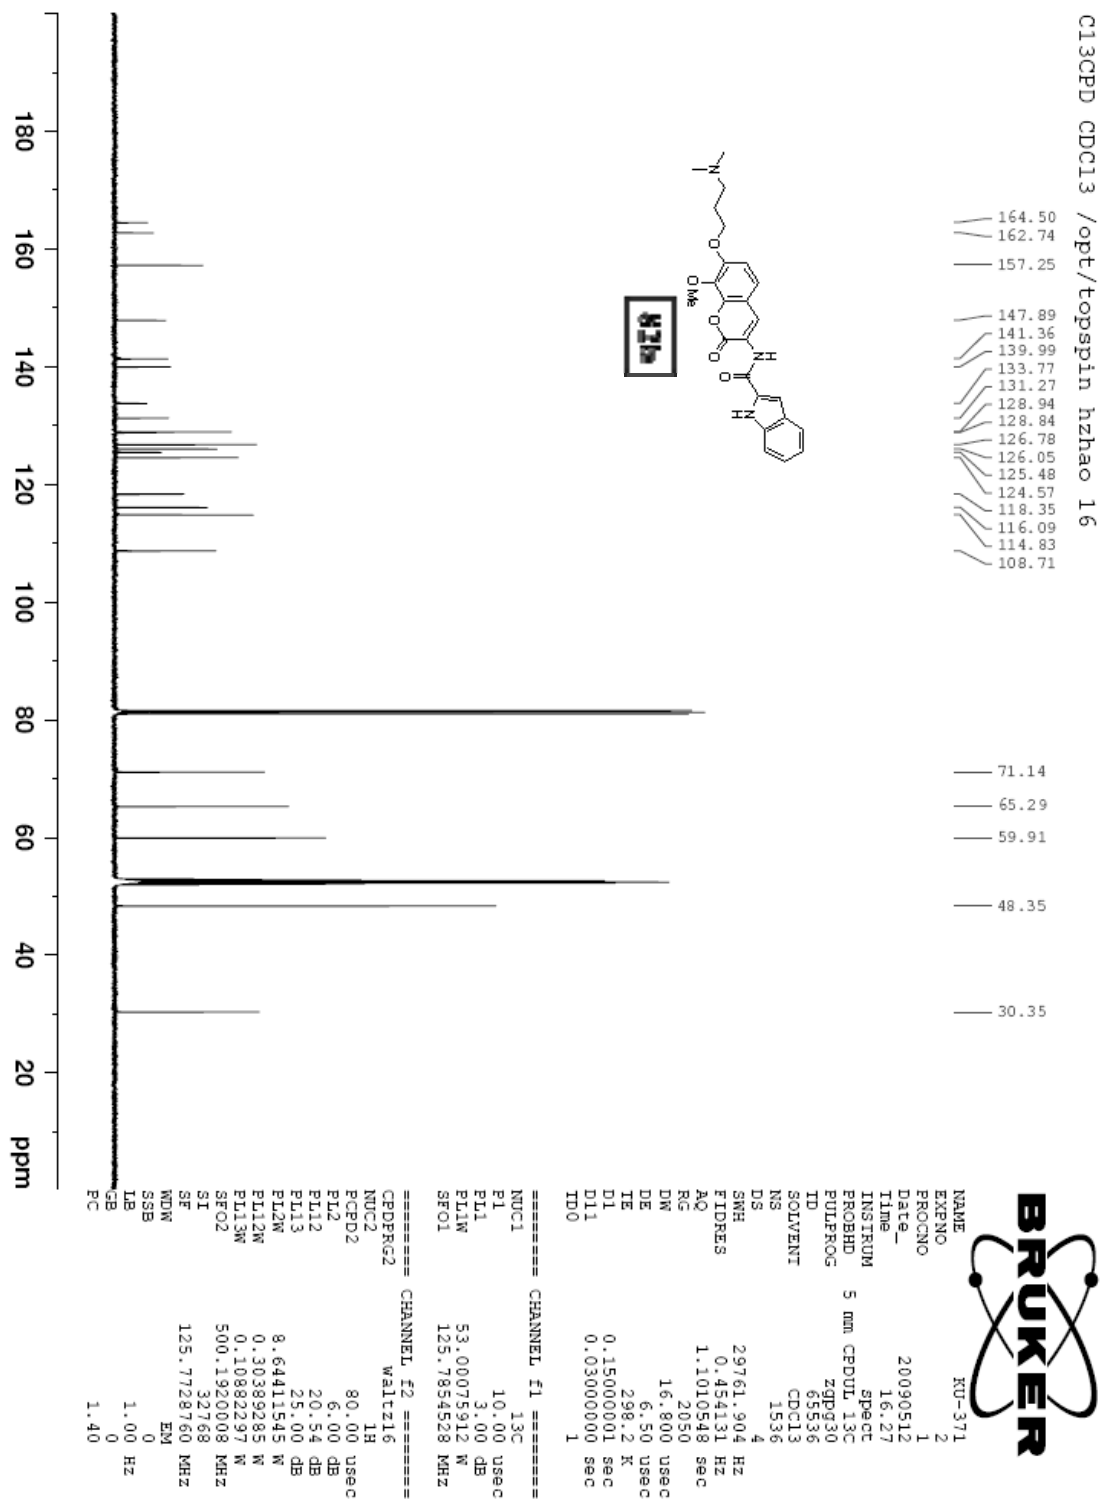



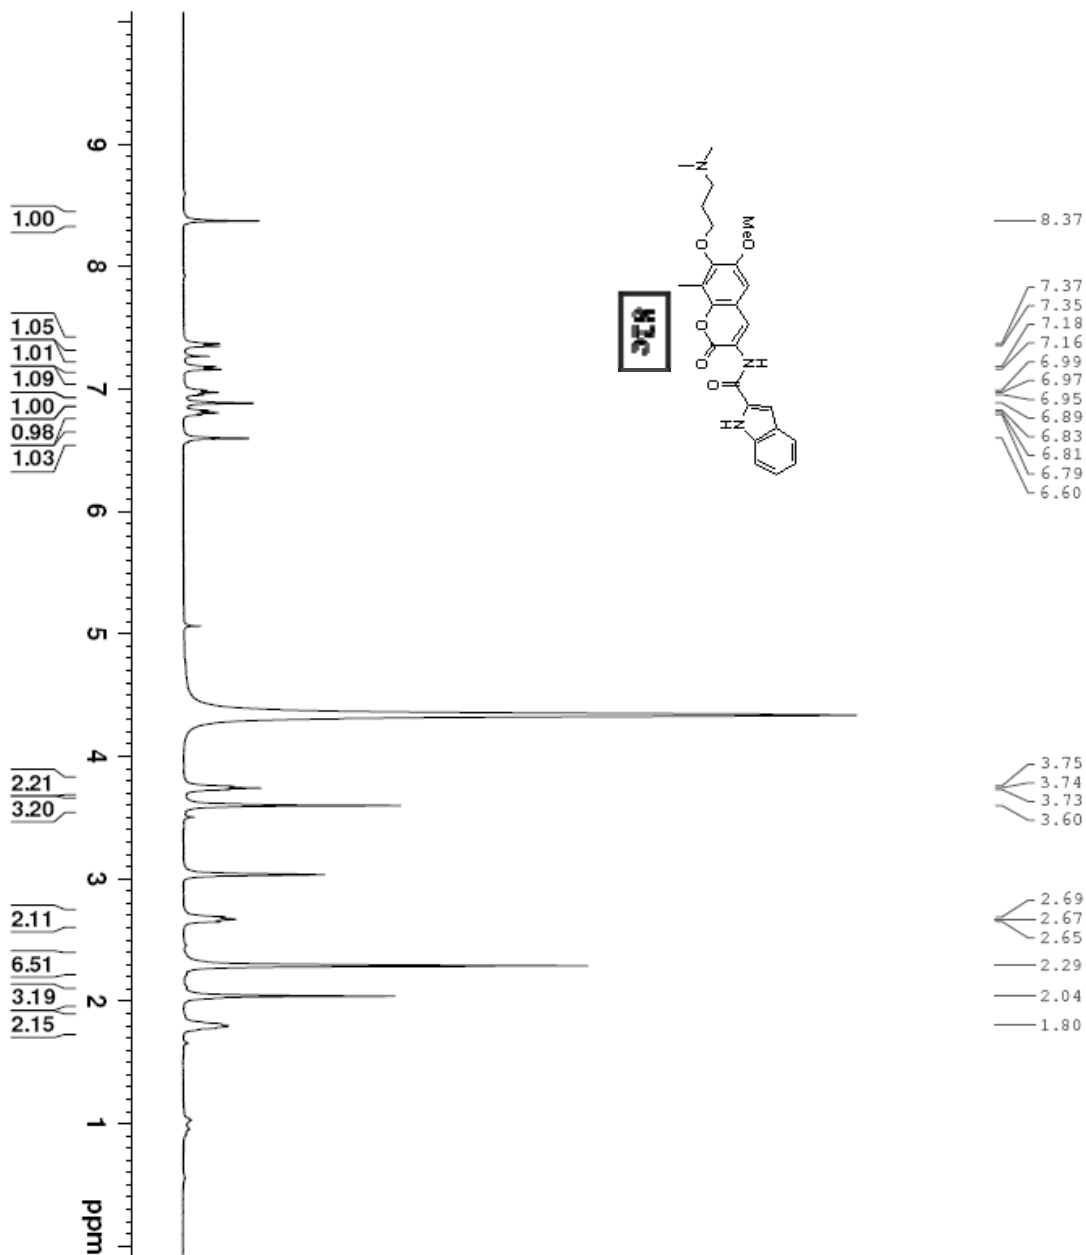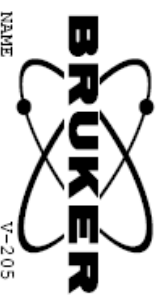

```

NAME V-205
EXPNO 1
PROCNO 1
Date_ 20090427
Time 13.50
INSTRUM dxt400
PROBHD 5 mm QNP 1H/13
PULPROG zg30
TD 65536
SOLVENT CDCl3
NS 16
DS 2
SWH 8278.146 Hz
FIDRES 0.126314 Hz
AQ 3.9584243 sec
RG 128
DE 60.400 usec
TE 293.9 K
D1 1.00000000 sec
ID0 1

===== CHANNEL f1 =====
NUC1 1H
P1 10.50 usec
PL1 -5.00 dB
SFO1 400.1324710 MHz
SI 32768
SF 400.1316957 MHz
WDW EM
SSB 0
LB 0.30 Hz
GB 0
PC 1.00
    
```

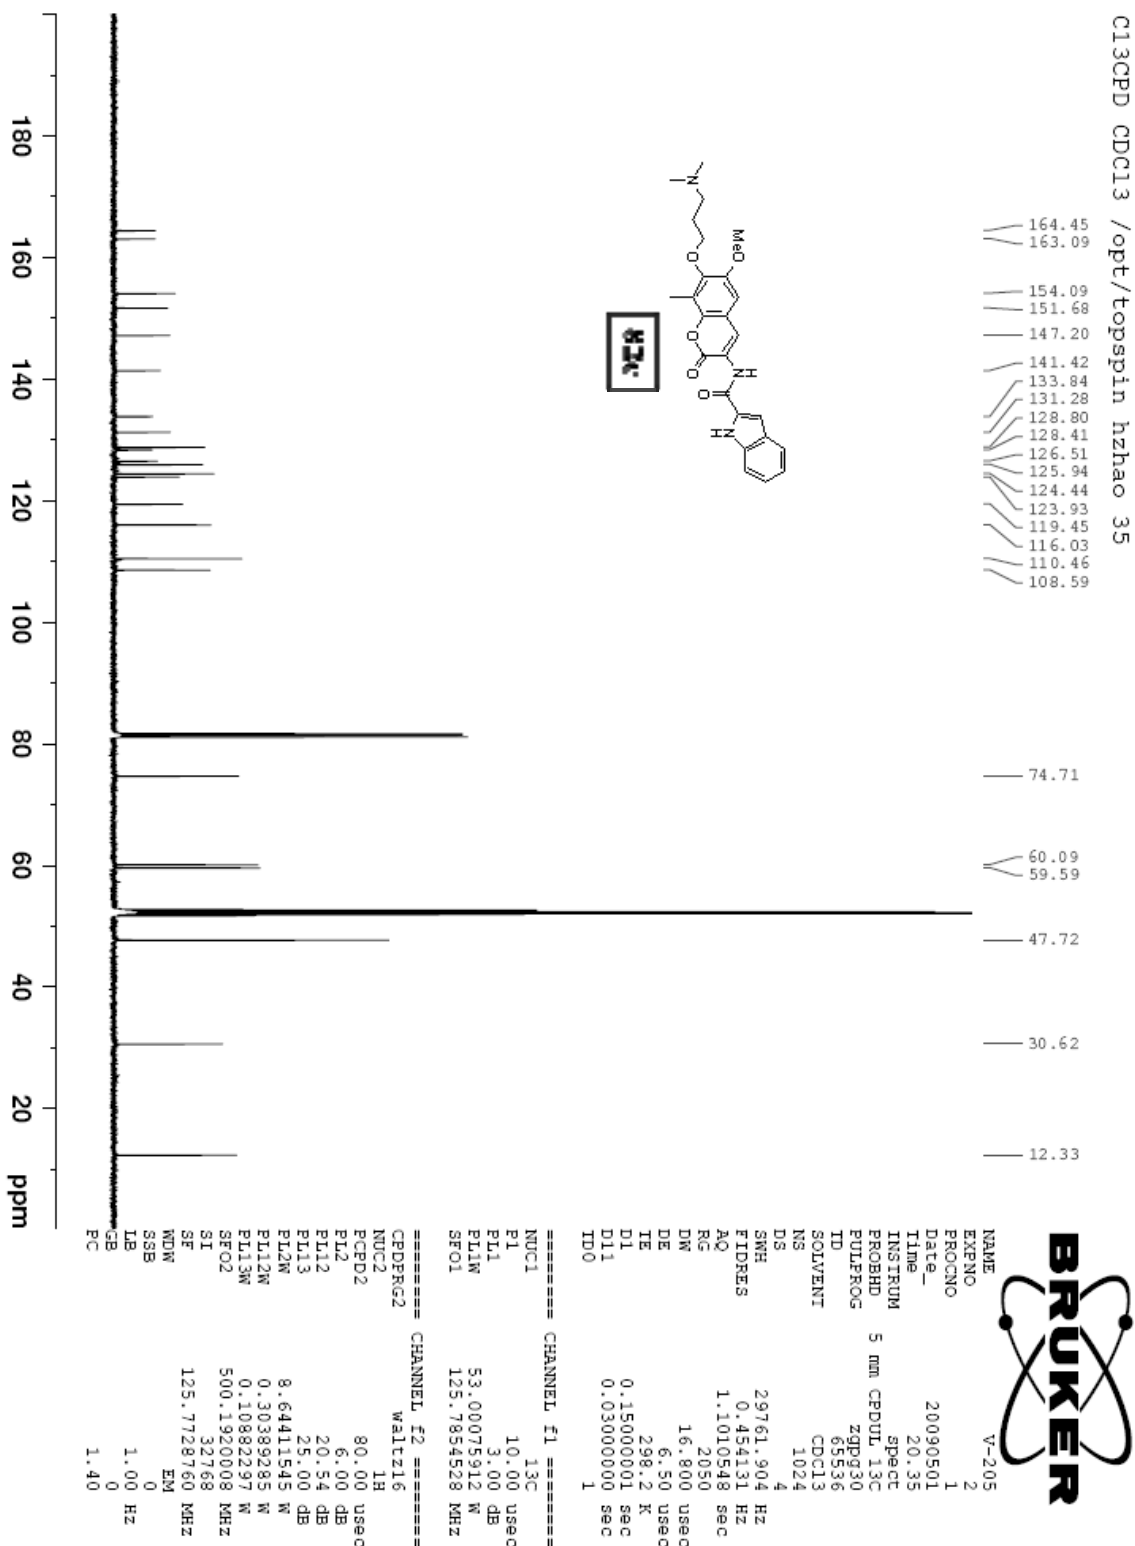

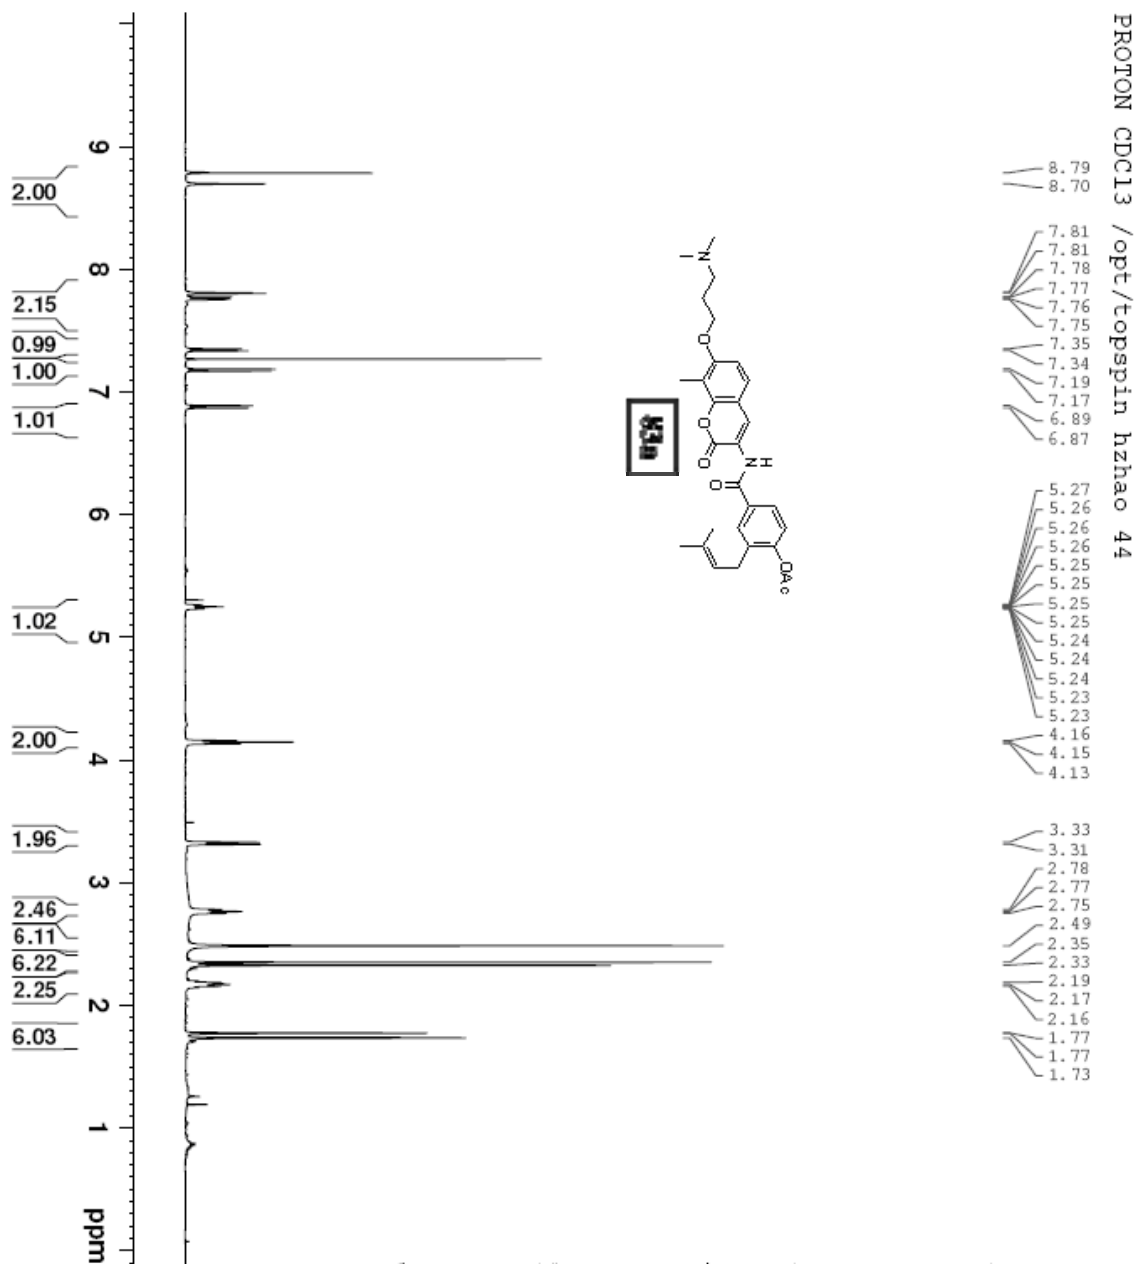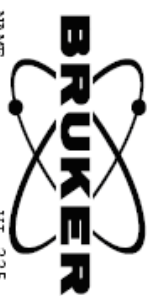

```

NAME          VI-225
EXPNO         1
PROCNO        1
Date_         20090827
Time         14.53
INSTRUM       spect
PROBHD        5 mm CPDUL 13C
PULPROG       zg30
TD            65536
SOLVENT       CDCl3
NS            15
DS            2
SWH           10330.578 Hz
FIDRES        0.157632 Hz
AQ            3.1719923 sec
RG            2050
DW            48.400 usec
DE            6.50 usec
TE            298.2 K
D1            1.00000000 sec
TD0           1

===== CHANNEL f1 =====
NUC1          1H
P1            15.00 usec
PL1           6.00 dB
PL1W          8.64411545 W
SFO1          500.1930889 MHz
SI            32768
SE            500.1900001 MHz
WDW           EM
SSB           0
LB            0.30 Hz
GB            0
PC            1.00
    
```

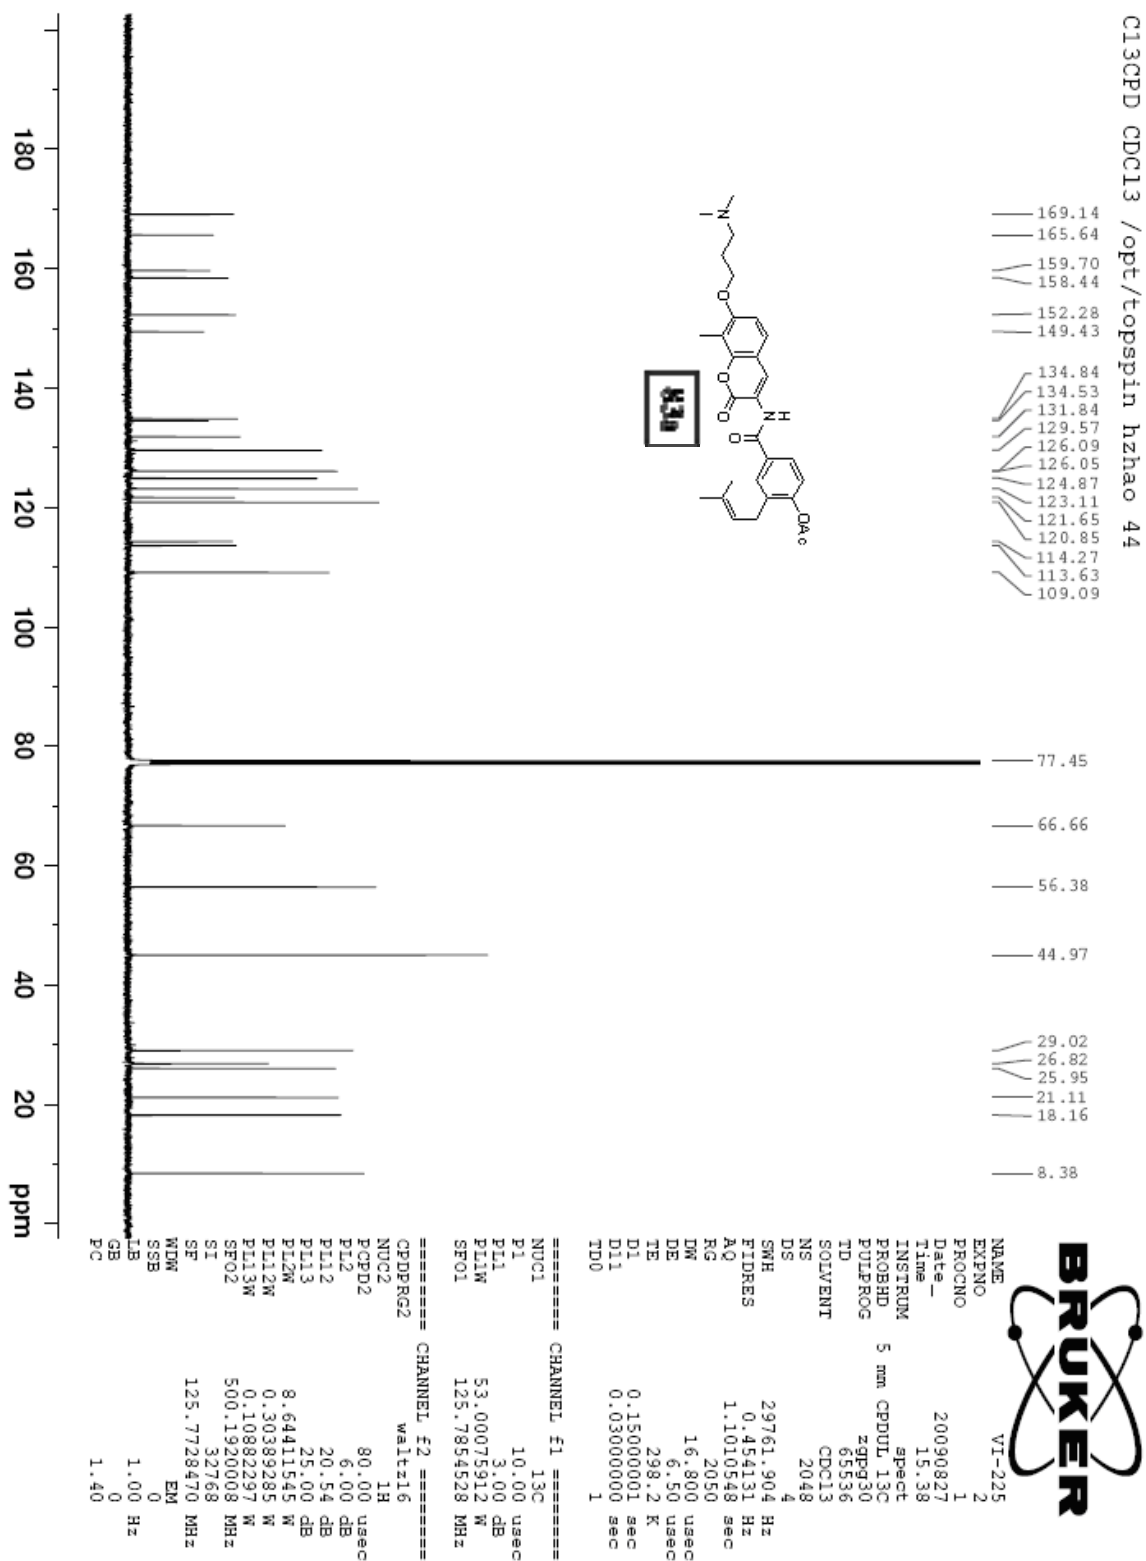

PROTON CDC13 /opt/topspin hzhao 37

- 8.79
- 8.79
- 8.79
- 8.70
- 7.80
- 7.80
- 7.77
- 7.77
- 7.75
- 7.75
- 7.22
- 7.21
- 7.19
- 7.17
- 6.95
- 6.94
- 5.26
- 5.25
- 5.25
- 5.25
- 5.24
- 5.24
- 5.24
- 5.23
- 5.23
- 5.23
- 4.19
- 4.17
- 4.16
- 3.99
- 3.33
- 3.31
- 2.68
- 2.66
- 2.65
- 2.50
- 2.40
- 2.38
- 2.37
- 2.35
- 2.35
- 2.34
- 2.14
- 2.12
- 2.11
- 1.77
- 1.77
- 1.73

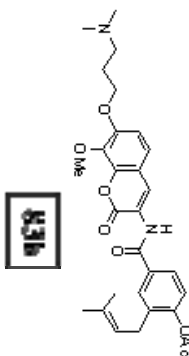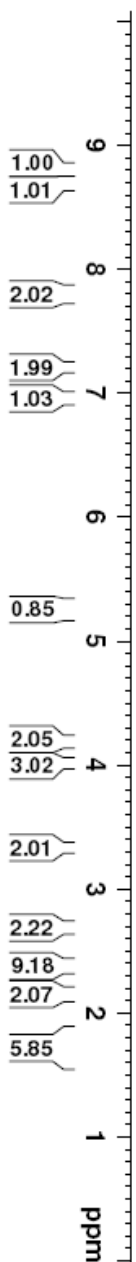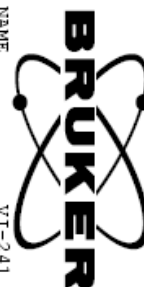

```

NAME          VI-241
EXPNO         1
PROCNO        1
Date_         20090902
Time_         21.09
INSTRUM       spect
PROBHD        5 mm CPDUL 13C
PULPROG       zg30
TD            65536
SOLVENT       CDC13
NS            16
DS            2
SWH           10330.578 Hz
FIDRES        0.157632 Hz
AQ            3.171923 sec
RG            1820
DW            48.400 usec
DE            6.50 usec
TE            298.2 K
D1            1.0000000 sec
ID0           1
    
```

```

===== CHANNEL f1 =====
NUC1          1H
P1            15.00 usec
PL1           6.00 dB
PL1W          8.64411545 W
SFO1          500.1930889 MHz
SI            32768
SF            500.1899993 MHz
WDW           EM
SSB           0
LB            0.30 Hz
GB            0
PC            1.00
    
```

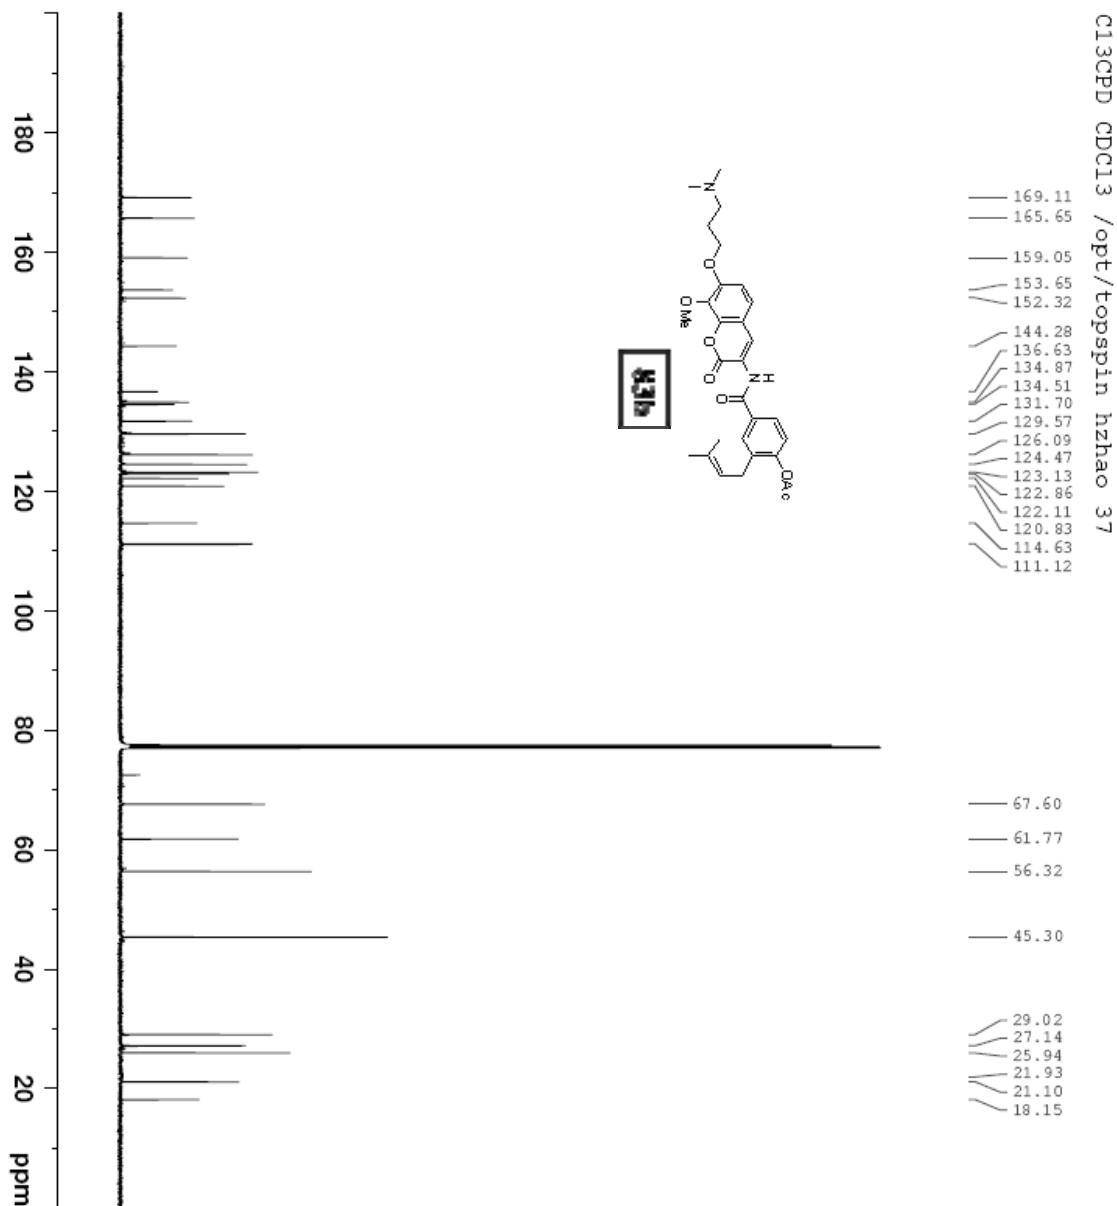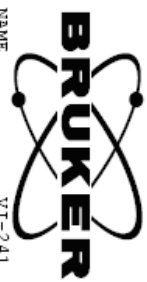

```

NAME VI-241
EXPNO 2
PROCNO 1
Date_ 20090902
Time 21.32
INSTRUM spect
PROBHD 5 mm CPDUI-13C
PULPROG zgpg30
TD 65536
SOLVENT CDCl3
NS 1024
DS 4
SWH 29761.904 Hz
FIDRES 0.454131 Hz
AQ 1.1010548 sec
RG 2050
DM 16.800 usec
DE 6.50 usec
TE 298.2 K
D1 0.15000001 sec
D11 0.03000000 sec
ID0 1
    
```

```

===== CHANNEL F1 =====
NUC1 13C
P1 10.00 usec
PL1 3.00 dB
PL1W 53.00075912 W
SFO1 125.7854528 MHz
    
```

```

===== CHANNEL F2 =====
CPDPRG2 waltz16
NUC2 1H
PCPD2 80.00 usec
PL2 6.00 dB
PL12 20.54 dB
PL13 25.00 dB
PL2W 8.64411545 W
PL12W 0.30389285 W
PL13W 0.10882297 W
SFO2 500.19200008 MHz
SI 32758
ST 125.7728485 MHz
WDW EM
SSB 0
GB 0
PC 1.40
    
```

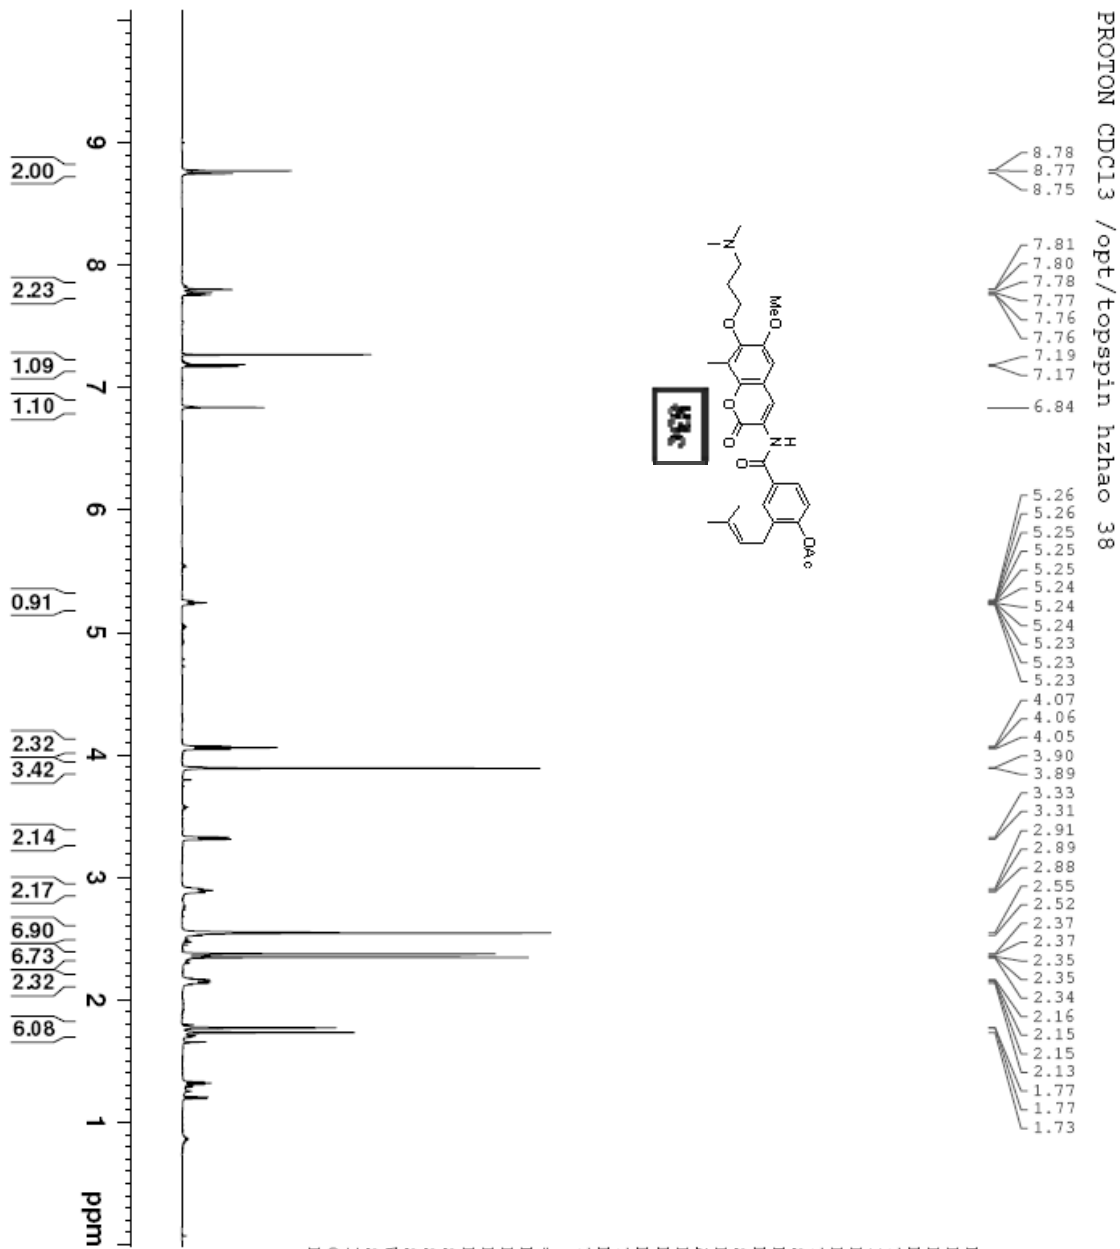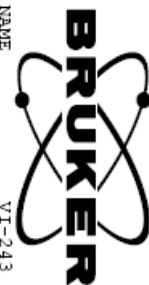

```

NAME VI-243
EXPNO 1
PROCNO 1
Date_ 20090902
Time 21.36
INSTRUM spect
PROBHD 5 mm CPDUL 13C
PULPROG zg30
ID 65536
SOLVENT CDCl3
NS 16
DS 2
SWH 10330.578 Hz
FIDRES 0.157632 Hz
AQ 3.1719923 sec
RG 1820
DW 48.400 usec
DE 6.50 usec
TE 298.2 K
D1 1.00000000 sec
TD0 1

===== CHANNEL f1 =====
NUC1 1H
P1 15.00 usec
PL1 6.00 dB
PL1W 8.64411545 W
SFO1 500.1930889 MHz
SI 32768
SF 500.1899998 MHz
WDW EM
SSB 0
LB 0.30 Hz
GB 0
PC 1.00
    
```

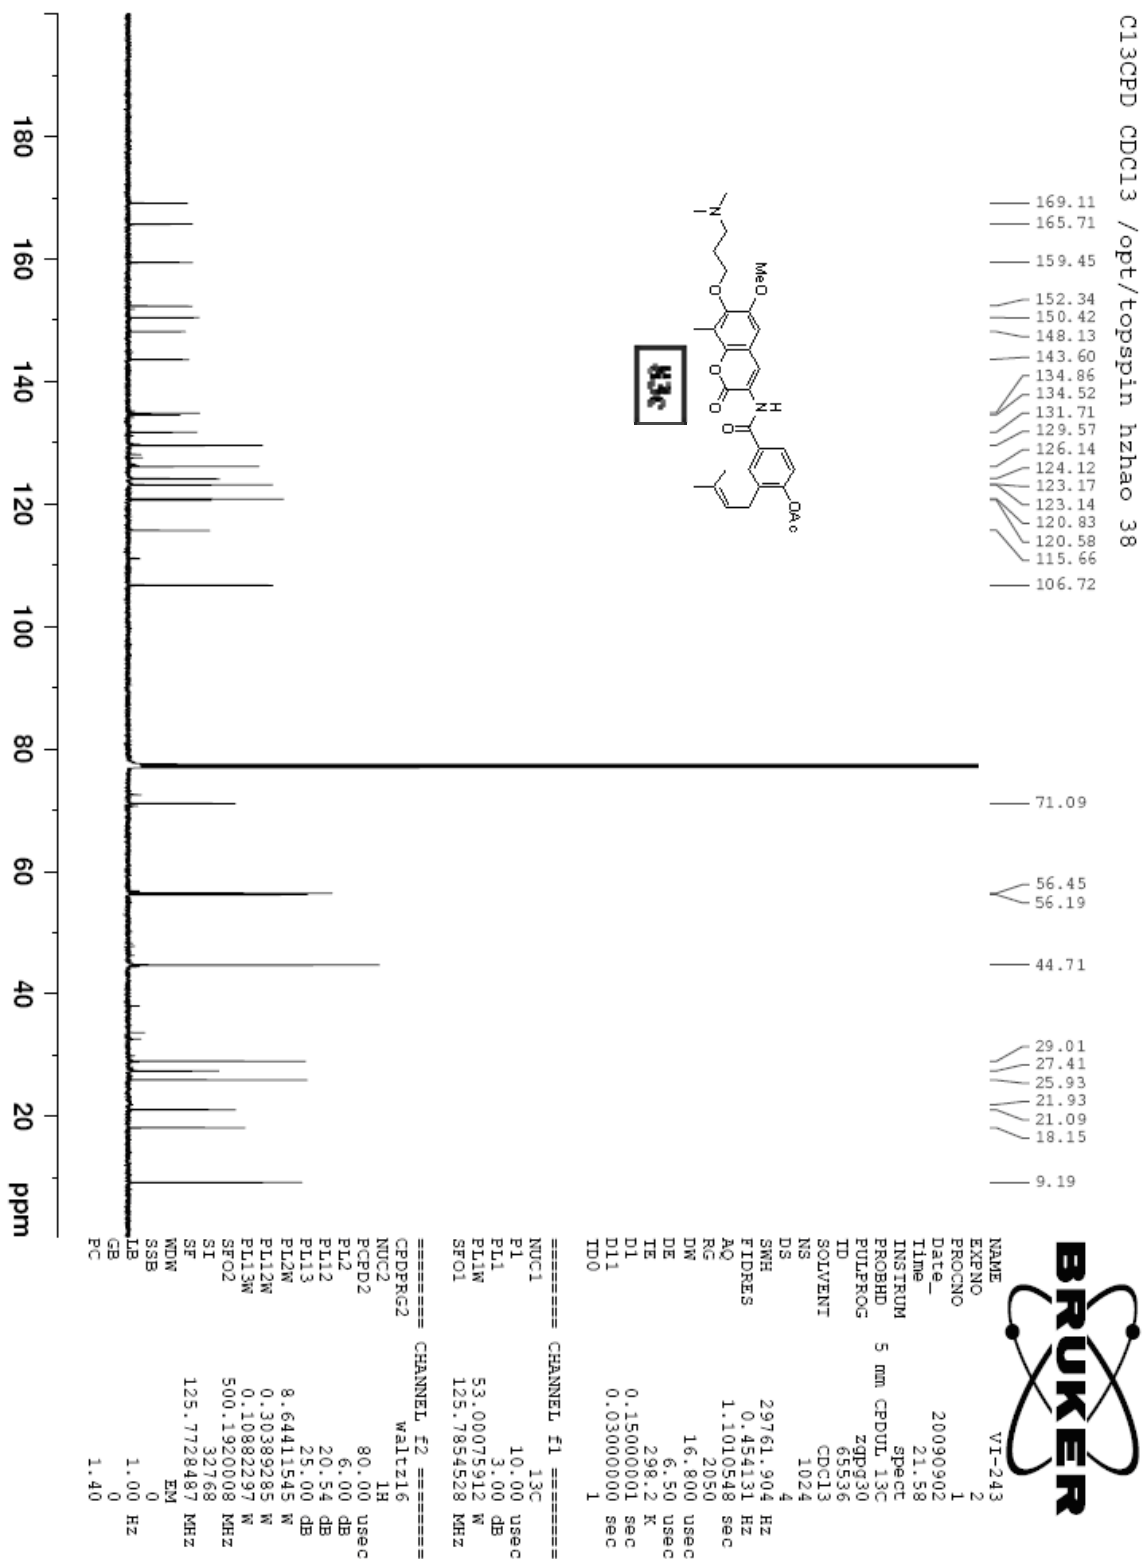



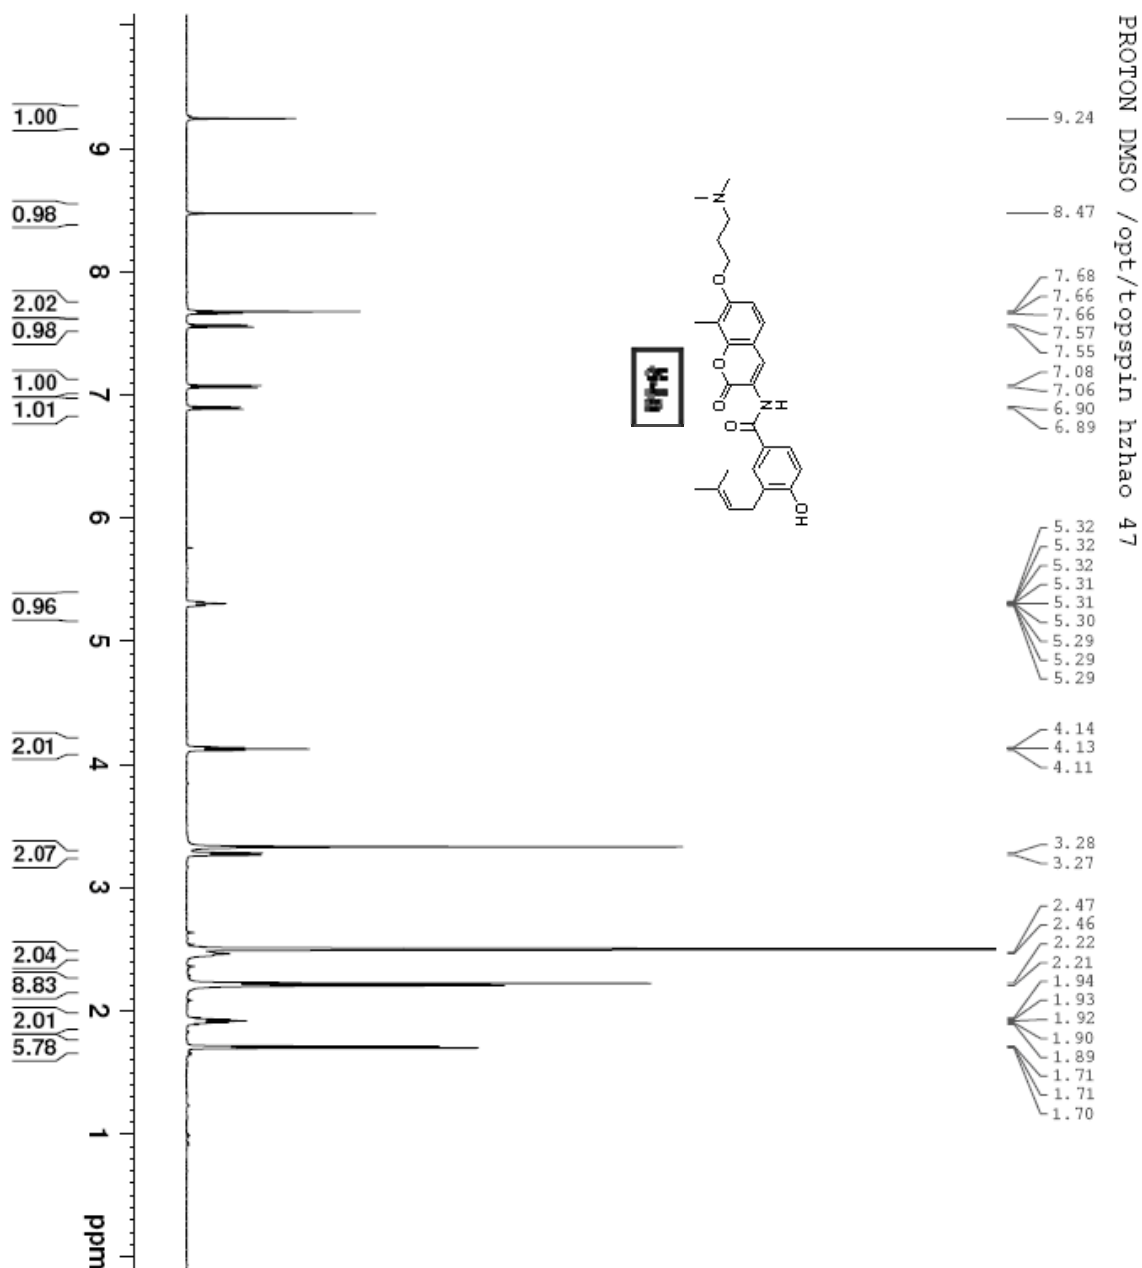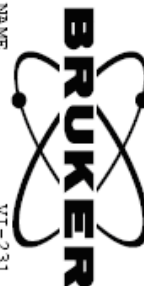

```

NAME VI-231
EXPNO 1
PROCNO 1
Date_ 20090827
Time 17.09
INSTRUM spect
PROBHD 5 mm CPDUL13C
PULPROG zg30
TD 65536
SOLVENT DMSO
NS 16
DS 2
SWH 10330.578 Hz
FIDRES 0.157632 Hz
AQ 3.171923 sec
RG 2050
DE 48.400 usec
TE 298.2 K
D1 1.00000000 sec
ID0 1
    
```

```

===== CHANNEL f1 =====
NUC1 1H
P1 15.00 usec
PL1 6.00 dB
PL1W 8.64411545 W
SFO1 500.1930889 MHz
SI 32768
SF 500.1900001 MHz
WDW EM
SSB 0
LB 0.30 Hz
GB 0
PC 1.00
    
```

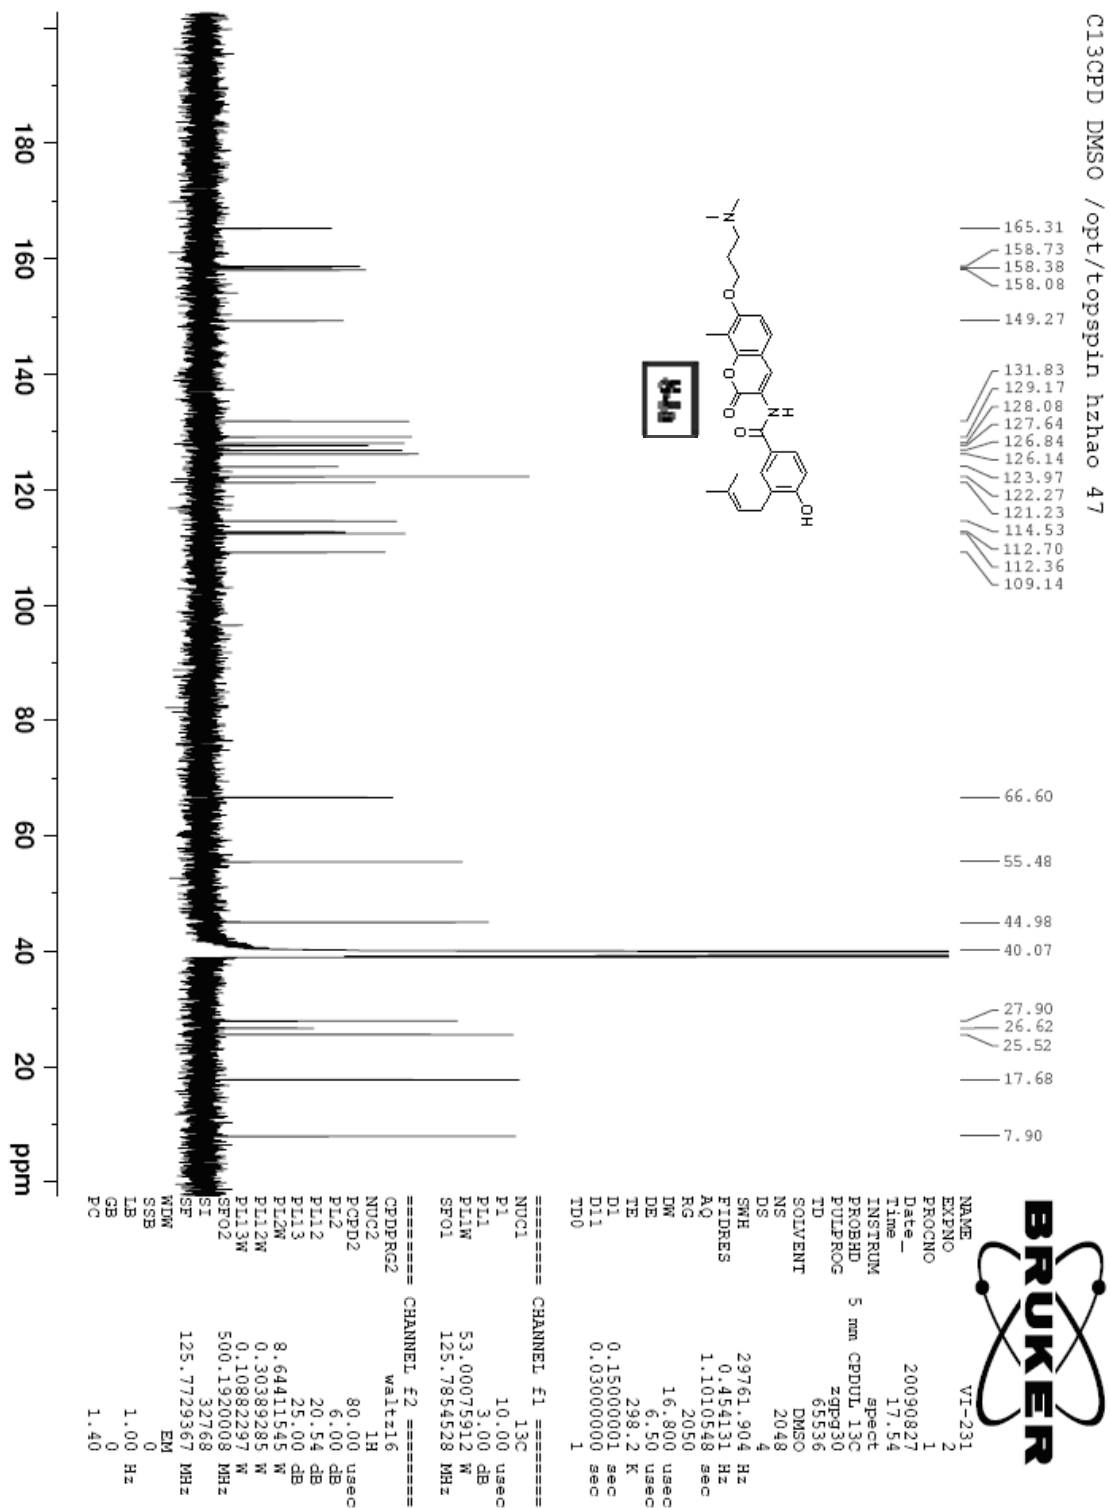

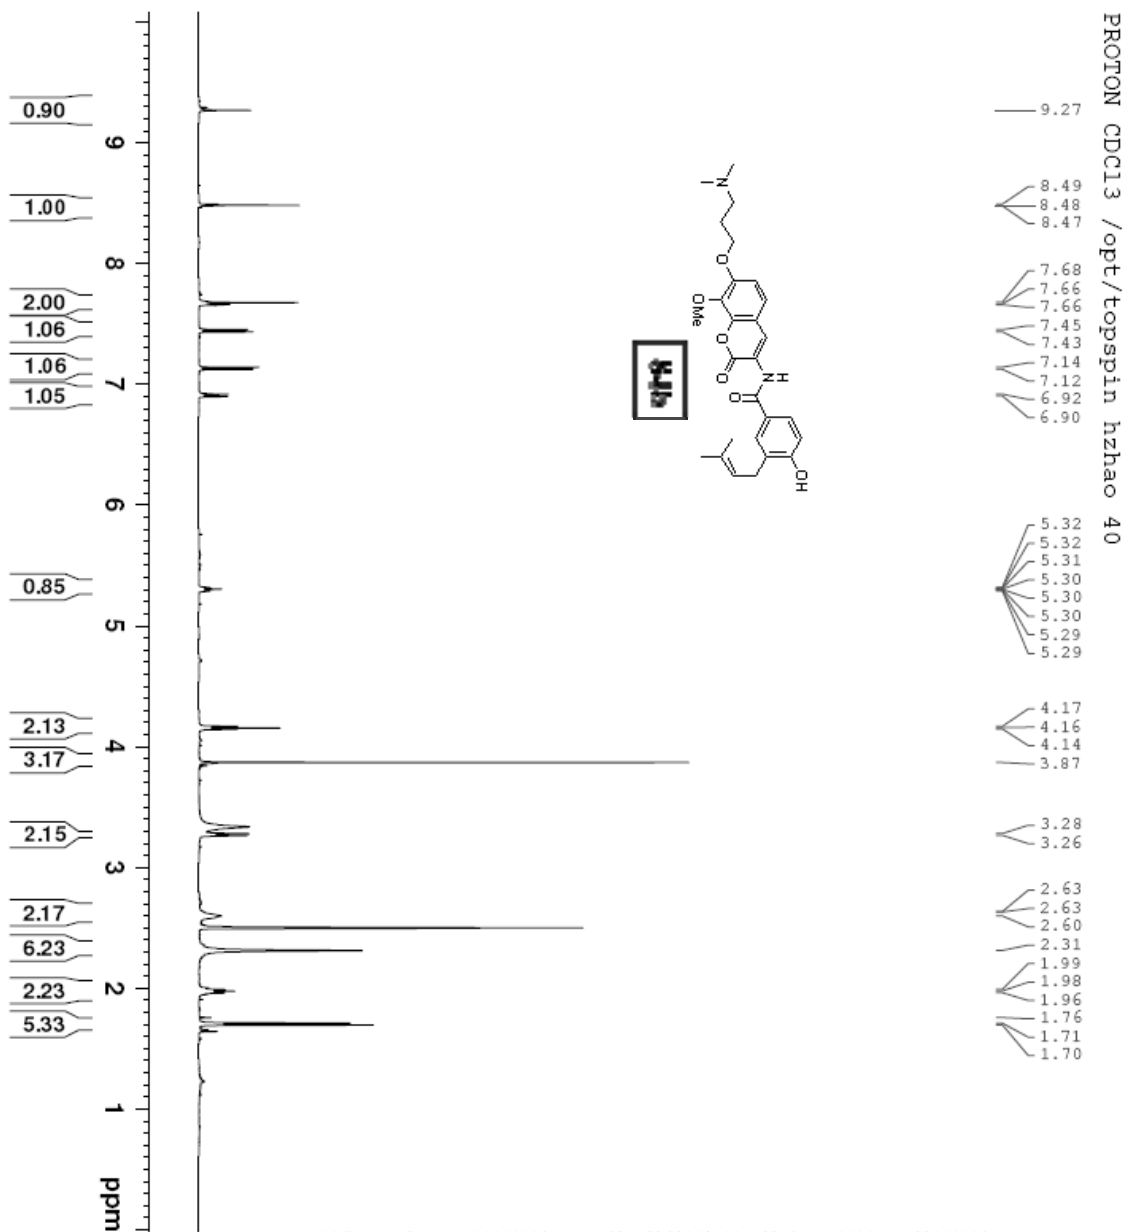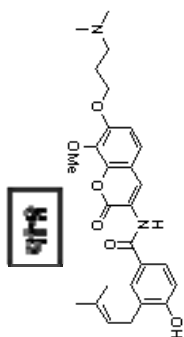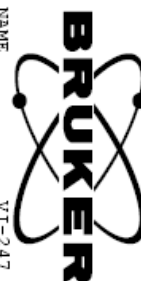

```

NAME VI-247
EXPNO 1
PROCNO 1
Date_ 20090902
Time 22.29
INSTRUM spect
PROBHD 5 mm CPDUL 13C
PULPROG zg30
TD 65536
FIDRES 0.157632 Hz
AQ 3.1719923 sec
RG 2050
DW 48.400 usec
DE 6.50 usec
TE 298.2 K
D1 1.00000000 sec
ID0 1

===== CHANNEL f1 =====
NUC1 1H
P1 15.00 usec
PL1 6.00 dB
PL1W 8.64411545 W
SFO1 500.1930889 MHz
SI 32
SF 500.1923713 MHz
WDW EM
SSB 0
LB 0.30 Hz
GB 0
PC 1.00
    
```

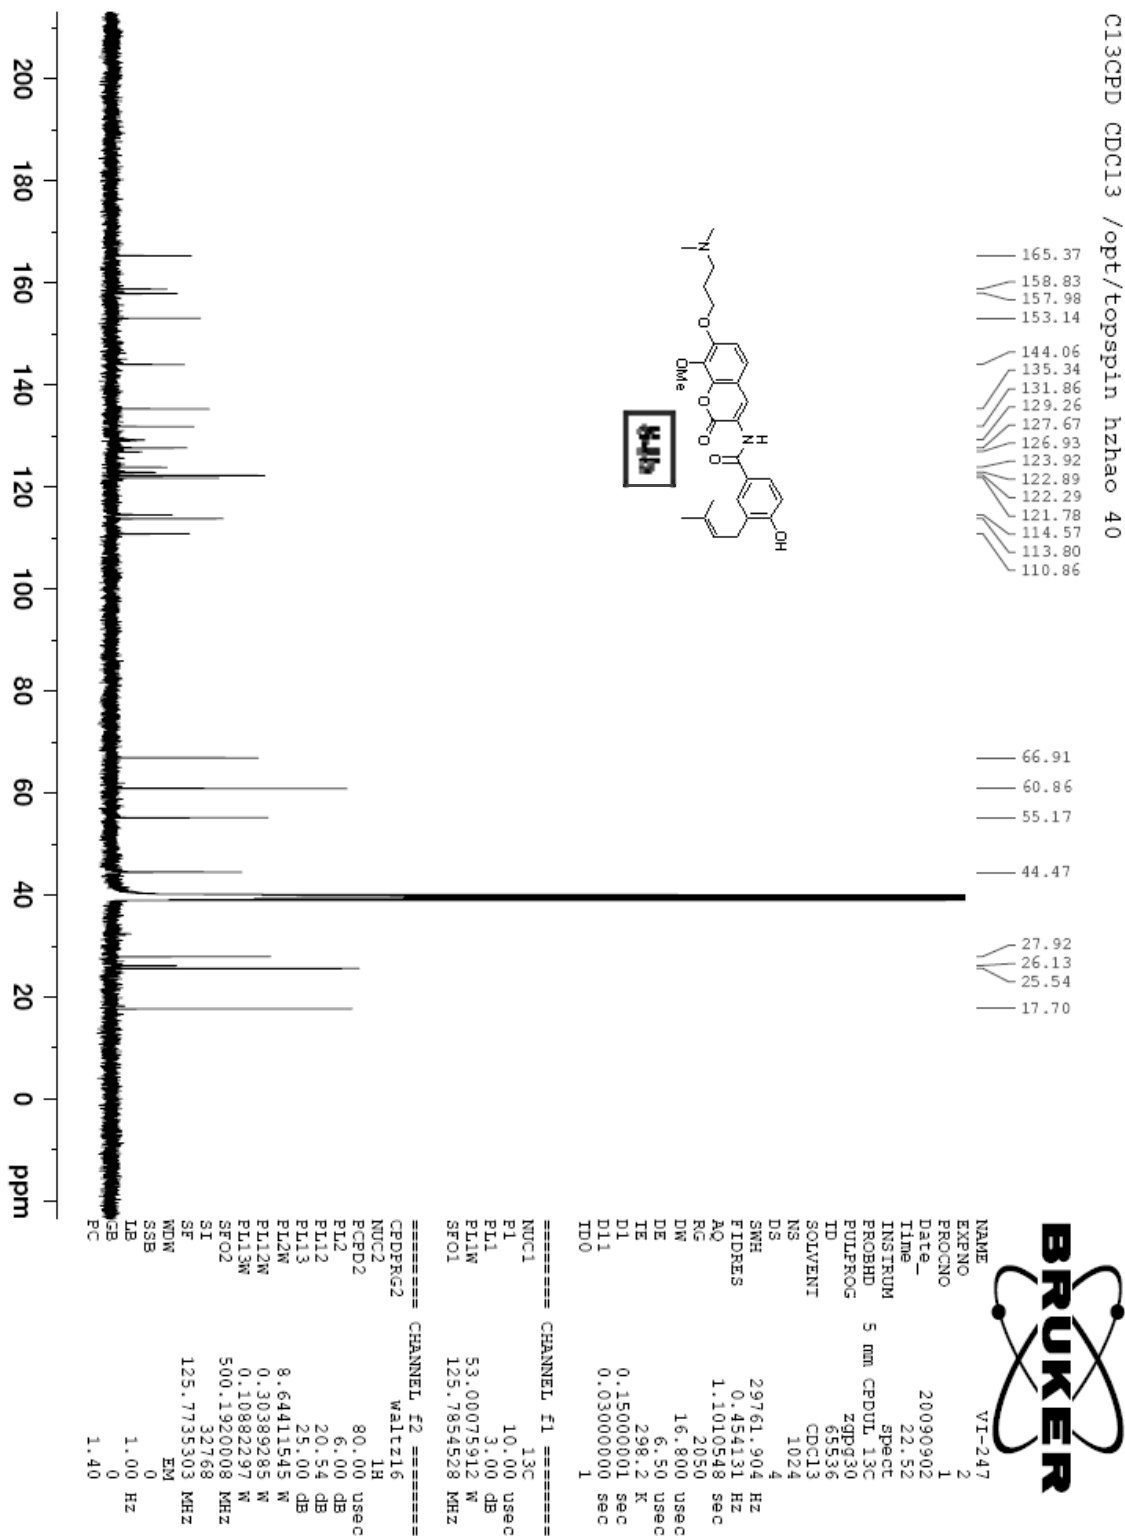

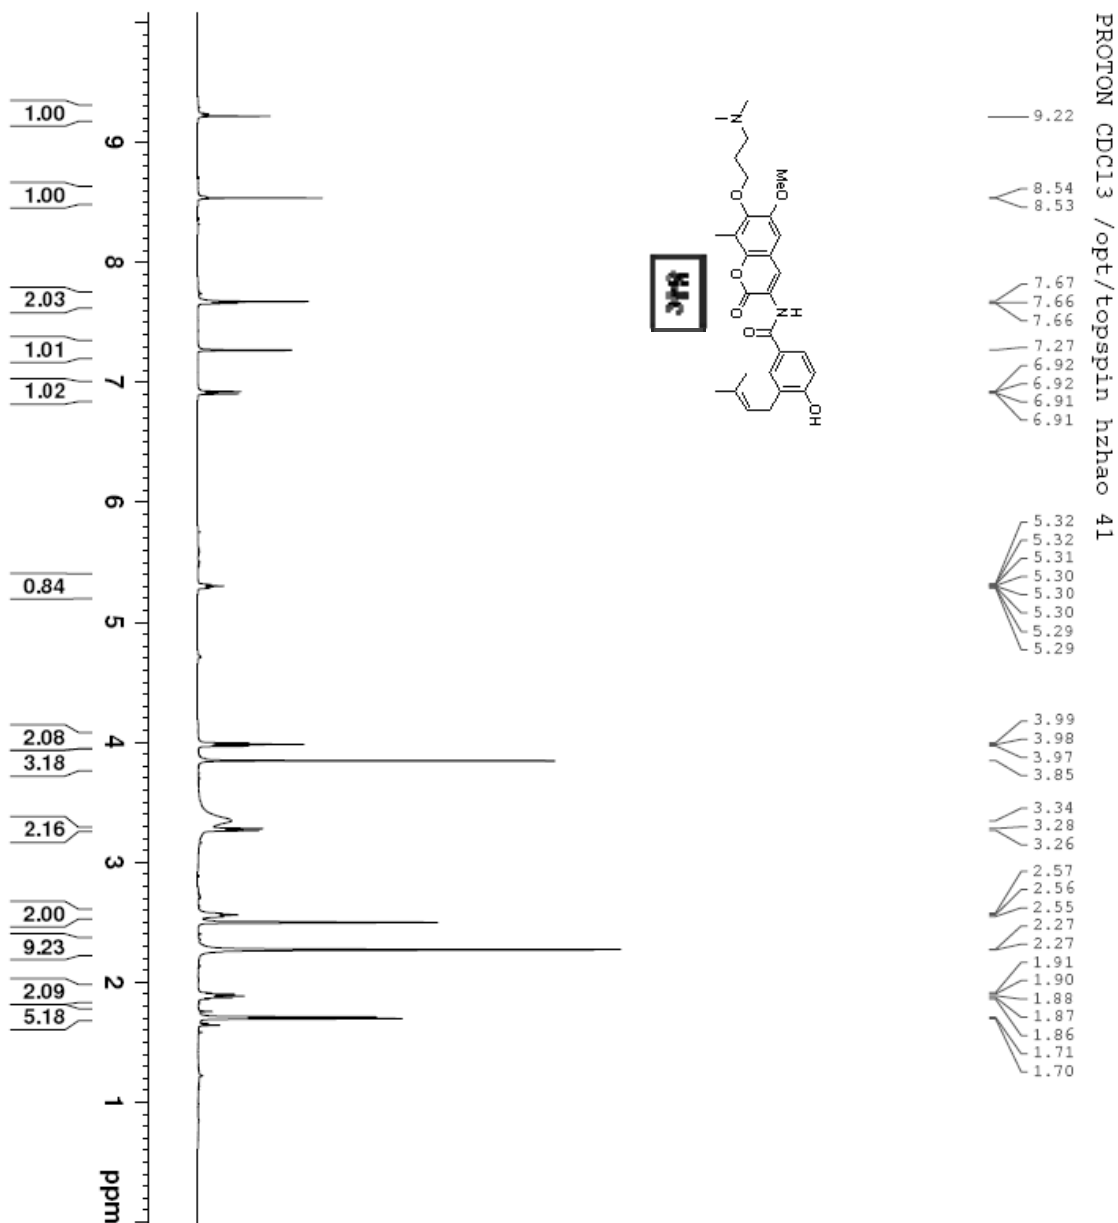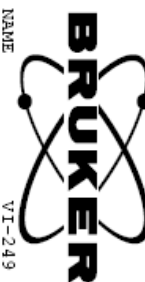

```

NAME          VI-249
EXPNO         1
PROCNO        1
Date_         20090902
Time         22.56
INSTRUM       spect
PROBHD        5 mm CPDUL13C
PULPROG       zg30
TD            65536
SOLVENT       CDCl3
NS            16
DS            2
SWH           10330.578 Hz
FIDRES        0.157632 Hz
AQ            3.171923 sec
RG            2050
DE            48.400 usec
TE            298.2 K
D1            1.00000000 sec
ID0           1

===== CHANNEL f1 =====
NUC1          1H
P1            15.00 usec
PL1           6.00 dB
PL1W          8.64411545 W
SFO1          500.1930889 MHz
SI            32768
SF            500.1925720 MHz
WDW           EM
SSB           0
LB            0.30 Hz
GB            0
PC            1.00
    
```

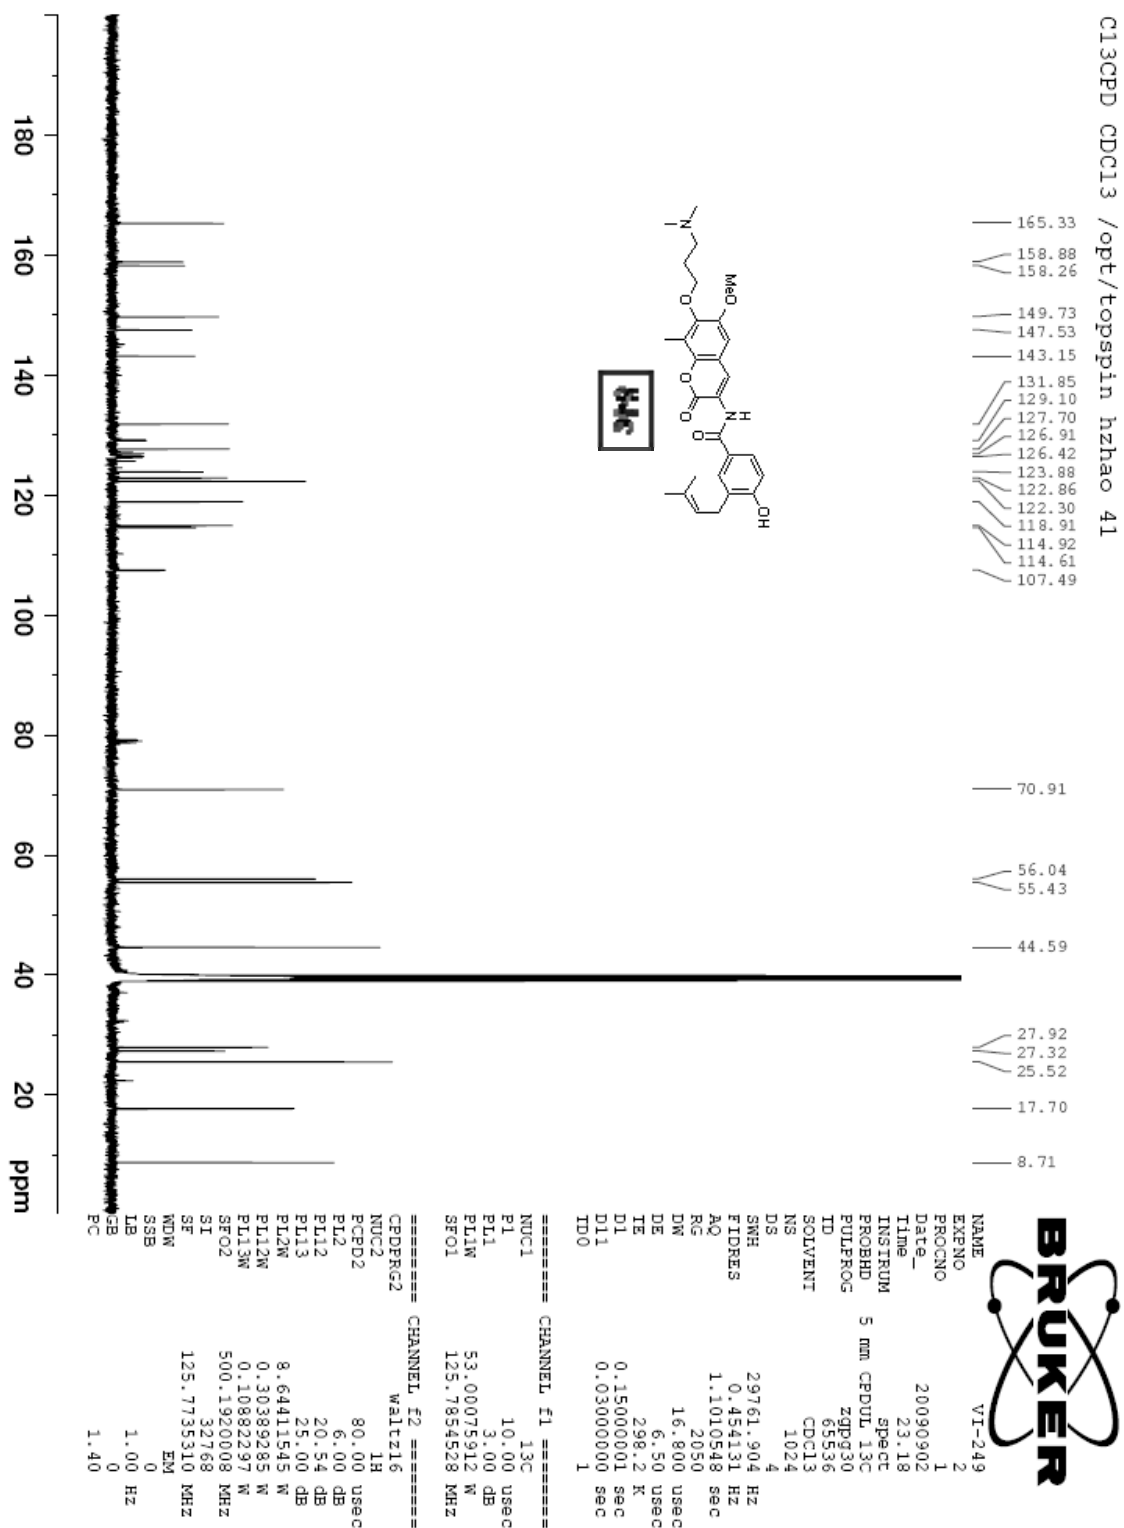

**Analytical reverse HPLC**

Instrument: Agilent 1260

Detector: Diode array detection

Wavelength: 254 nm

Column: ZORBAX Eclipse Plus (150 mm

X 4.6 mm, 5 $\mu$ m)

Temperature: 27 °C

Solvent system: **A:** H<sub>2</sub>O ( 0.2% H<sub>3</sub>PO<sub>4</sub>) **B:**  
acetonitrile

Flow rate: 1.0 mL/min

|       | <b>A</b> | <b>B</b> |
|-------|----------|----------|
| 0 min | 70%      | 30%      |
| 18min | 52%      | 48%      |
| 19min | 95%      | 5%       |
| 22min | 95%      | 5%       |
| 23min | 70%      | 30%      |

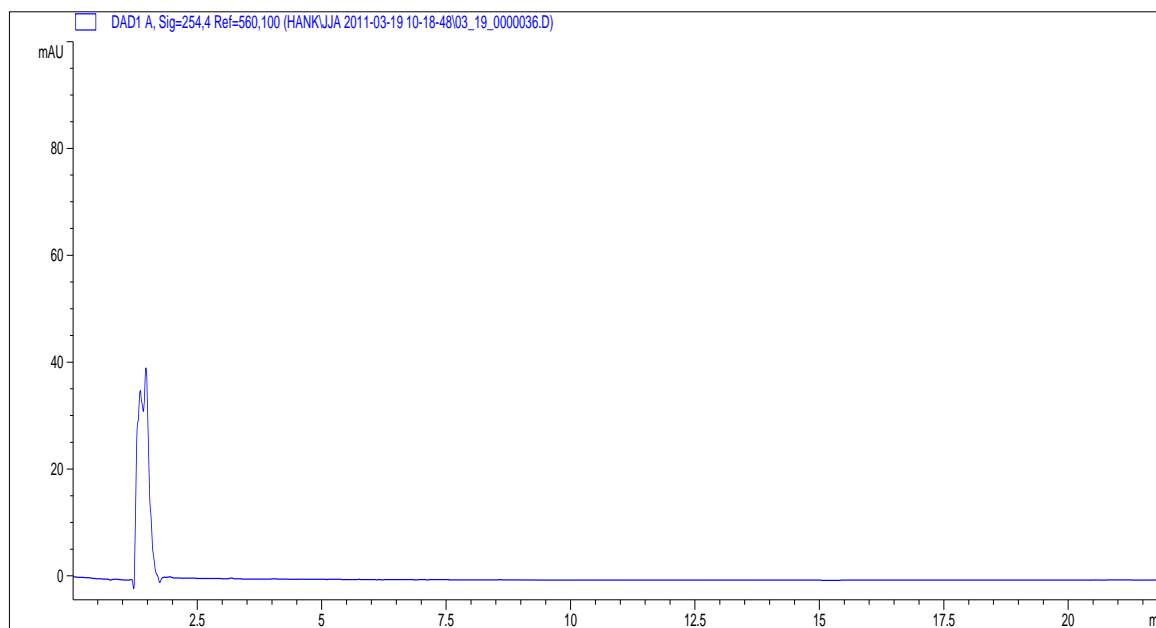

Analytical reverse-phase HPLC profile of Dimethylsulfoxide (DMSO) as background (used as solvent to dissolve the novobiocin analogues)

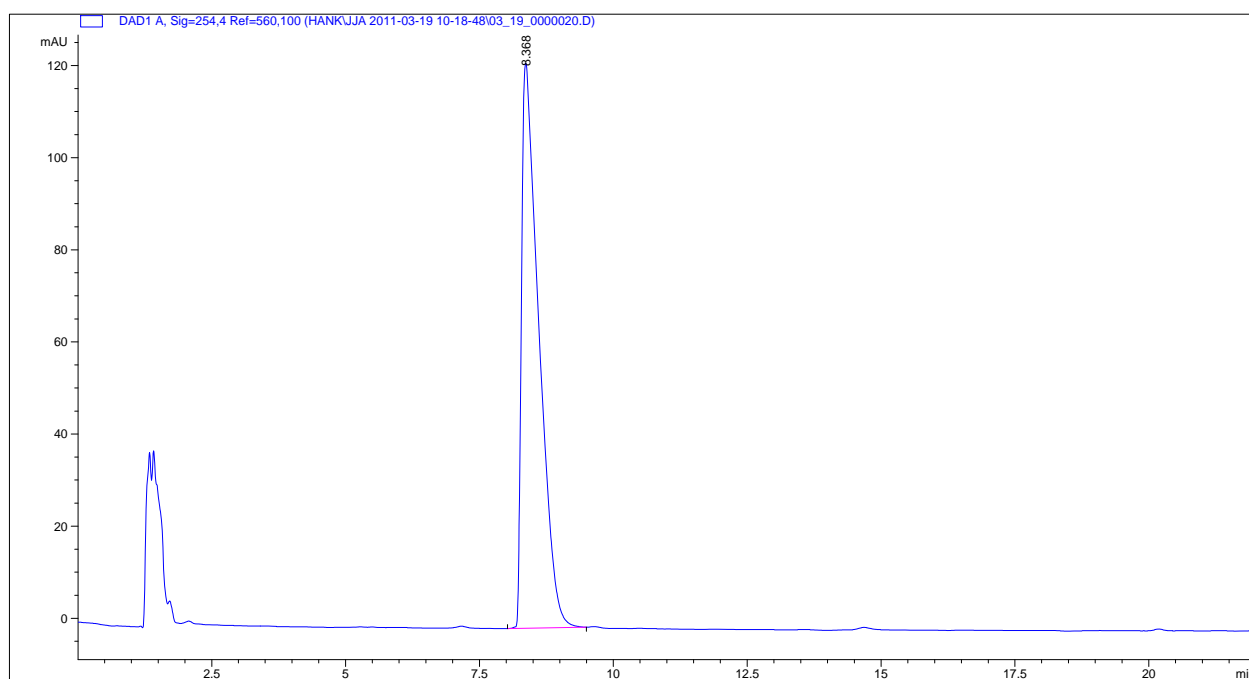

Analytical reverse-phase HPLC profile of compound **78a** prior to bioassay. Retention time = 8.37 min. Purity = 100%. Absorbance wavelength = 254 nm.



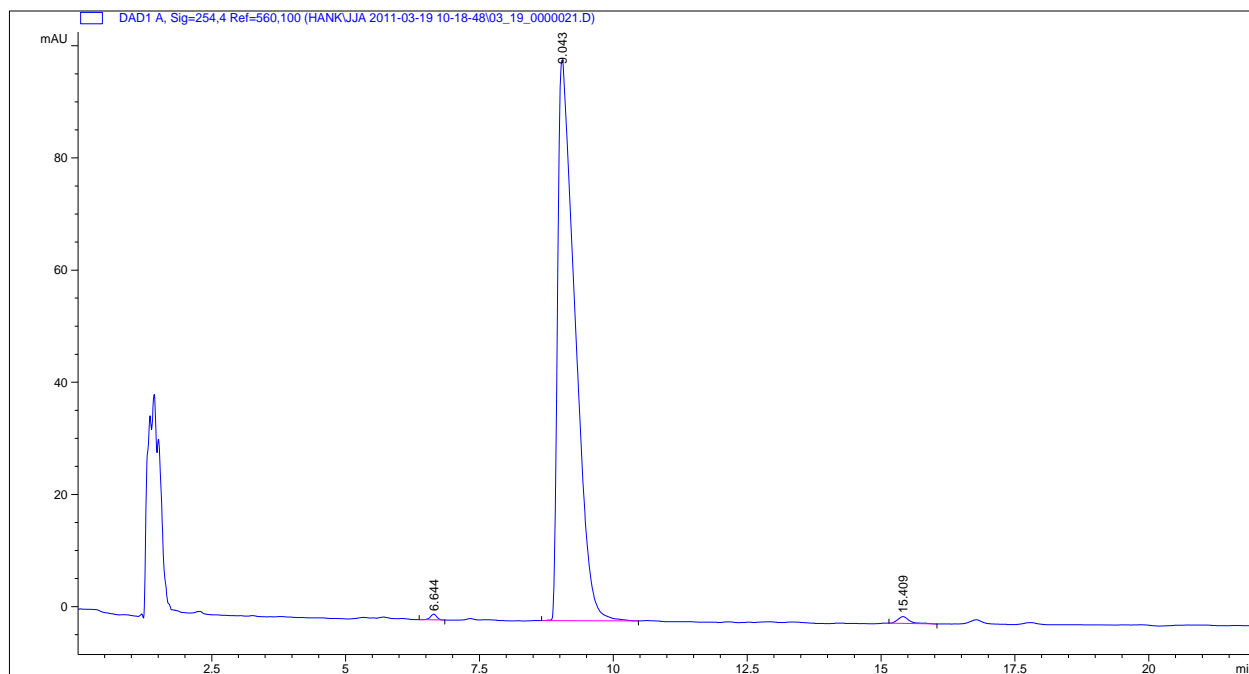

Analytical reverse-phase HPLC profile of compound **78b** prior to bioassay. Retention time = 9.04 min. Purity = 98.8%. Absorbance wavelength = 254 nm.

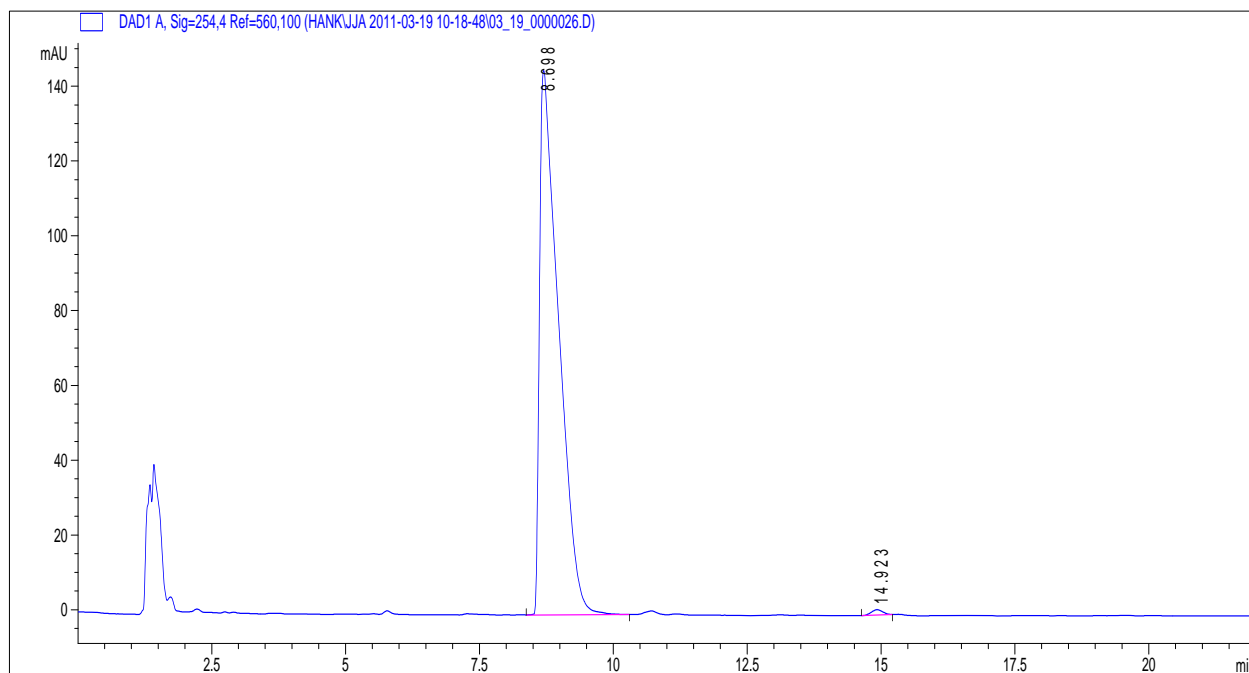

Analytical reverse-phase HPLC profile of compound **78c** prior to bioassay. Retention time = 8.70 min. Purity = 99.4%. Absorbance wavelength = 254 nm.

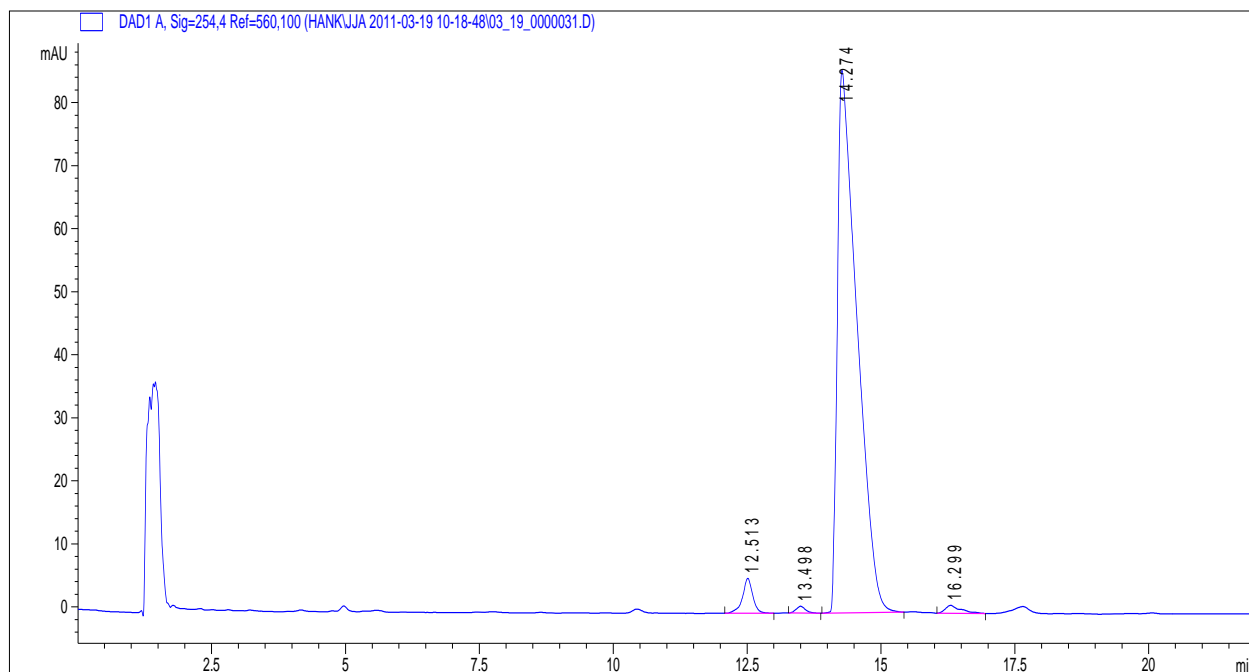

Analytical reverse-phase HPLC profile of compound **79a** prior to bioassay. Retention time = 14.3 min. Purity = 95.2%. Absorbance wavelength = 254 nm.

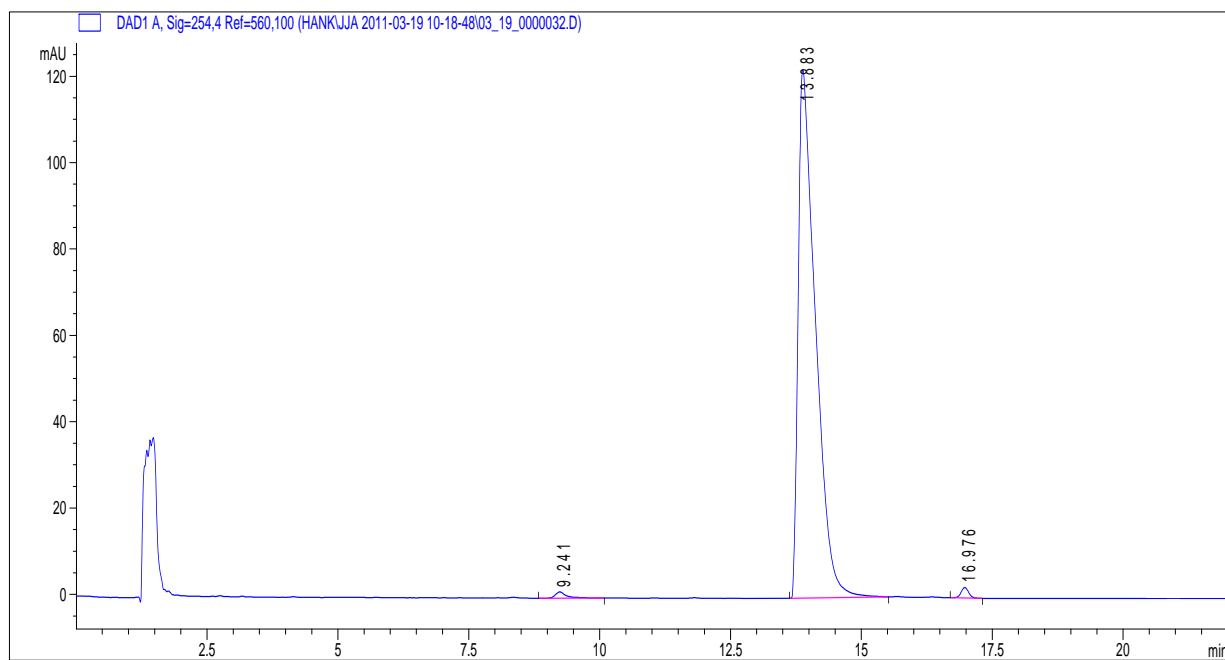

Analytical reverse-phase HPLC profile of compound **79c** prior to bioassay. Retention time = 13.9 min. Purity = 98.4%. Absorbance wavelength = 254 nm.

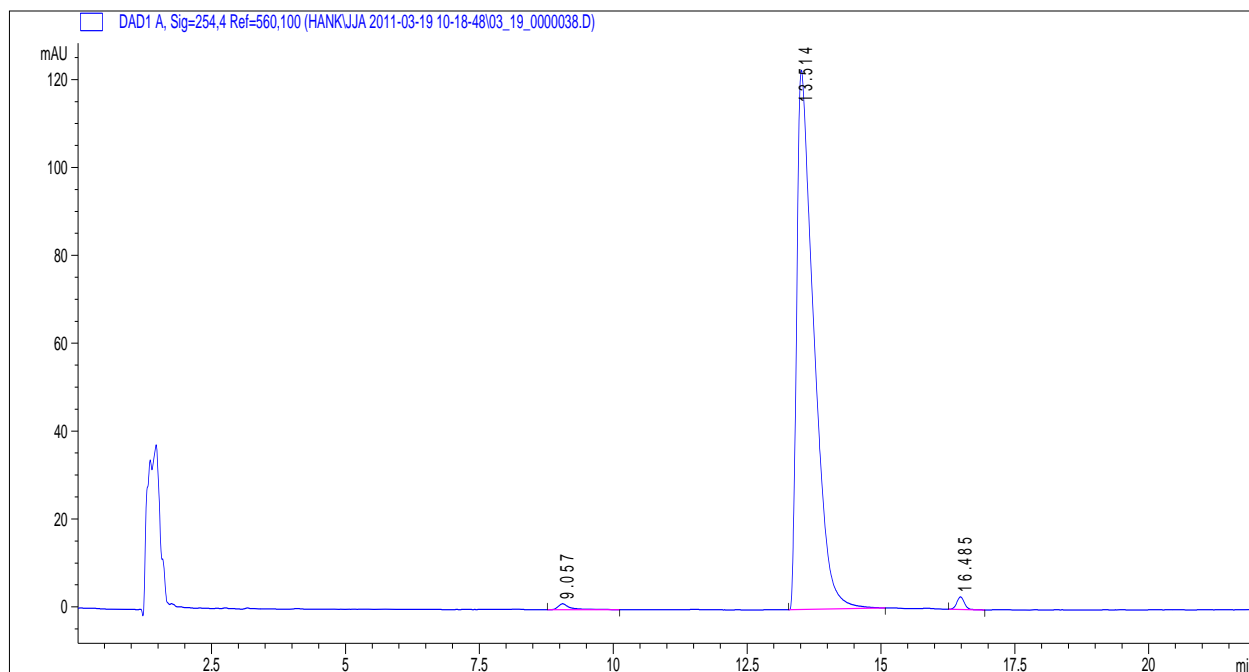

Analytical reverse-phase HPLC profile of compound **80a** prior to bioassay. Retention time = 13.5 min. Purity = 98.2%. Absorbance wavelength = 254 nm.

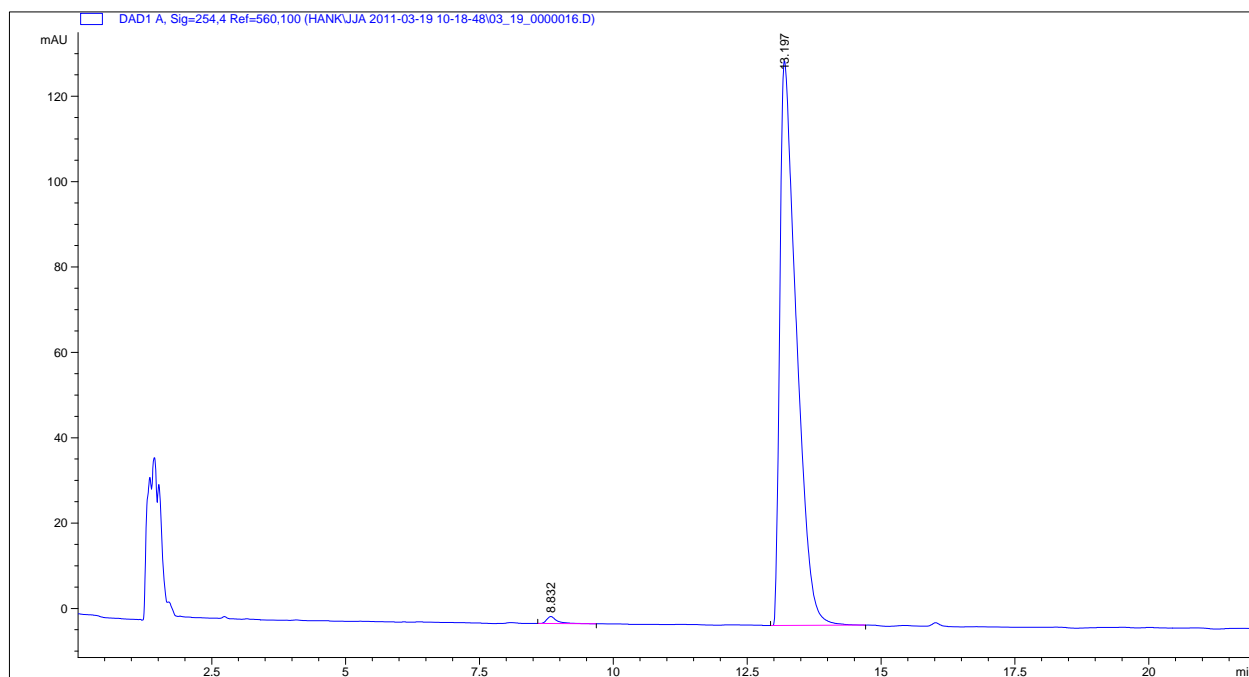

Analytical reverse-phase HPLC profile of compound **80c** prior to bioassay. Retention time = 13.2 min. Purity = 99.2%. Absorbance wavelength = 254 nm.

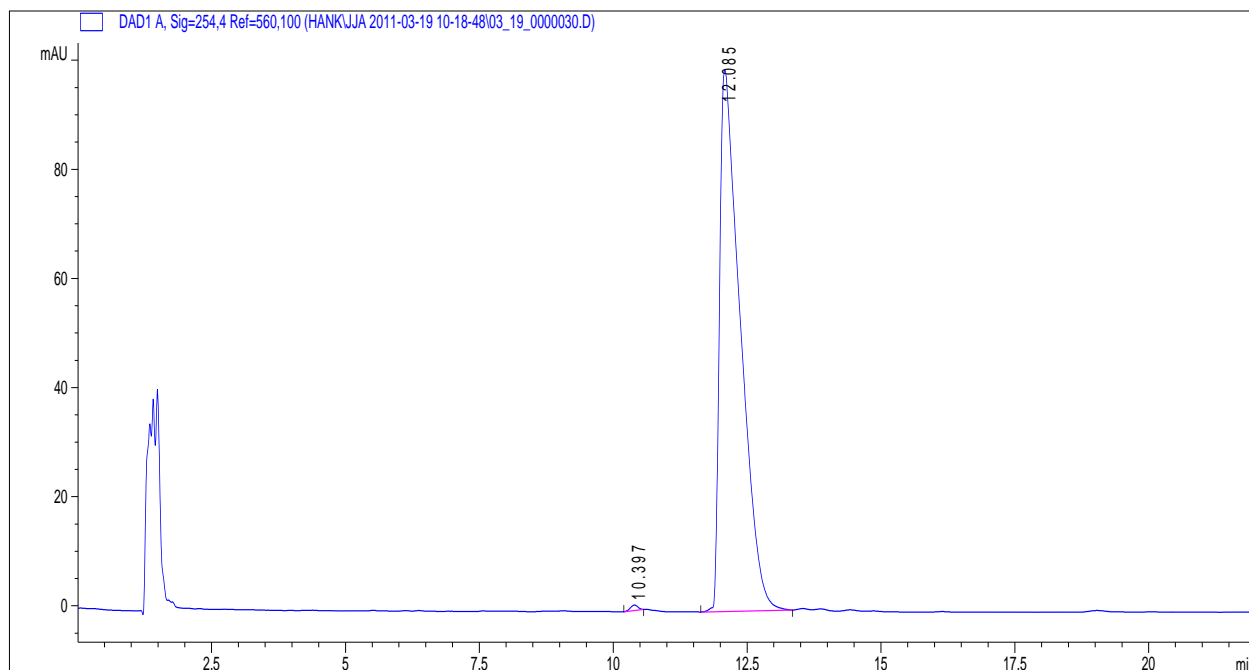

Analytical reverse-phase HPLC profile of compound **82a** prior to bioassay. Retention time = 12.1 min. Purity = 99.6%. Absorbance wavelength = 254 nm.

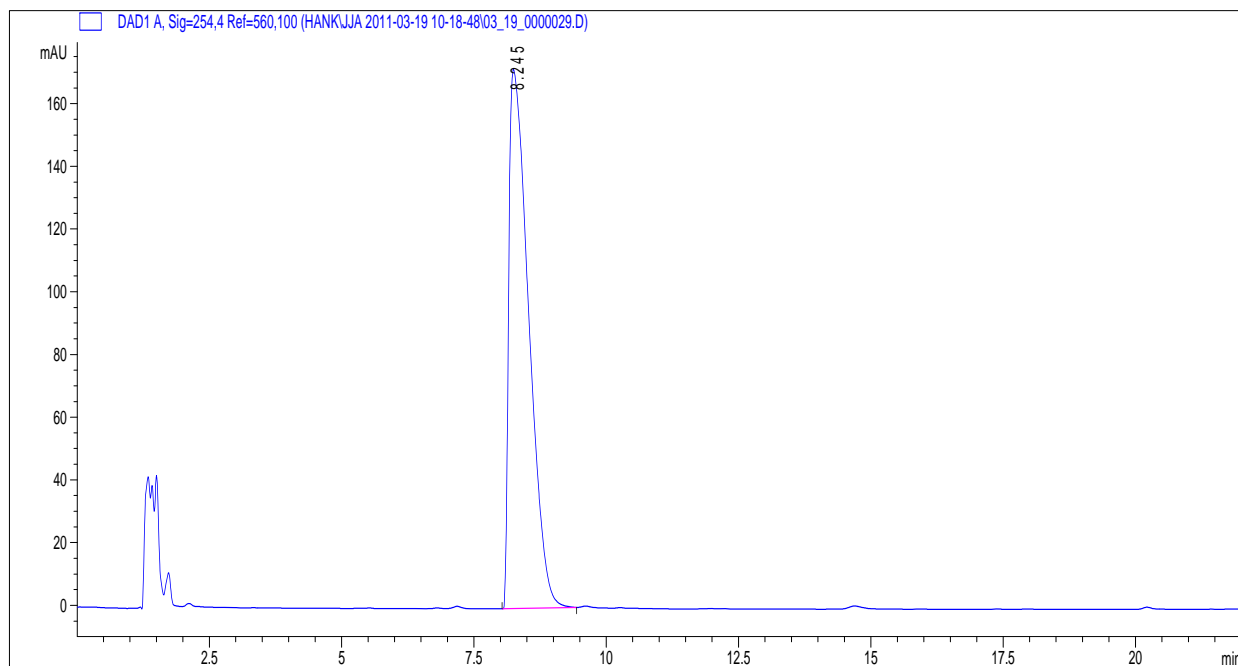

Analytical reverse-phase HPLC profile of compound **82b** prior to bioassay. Retention time = 8.25 min. Purity = 100%. Absorbance wavelength = 254 nm.

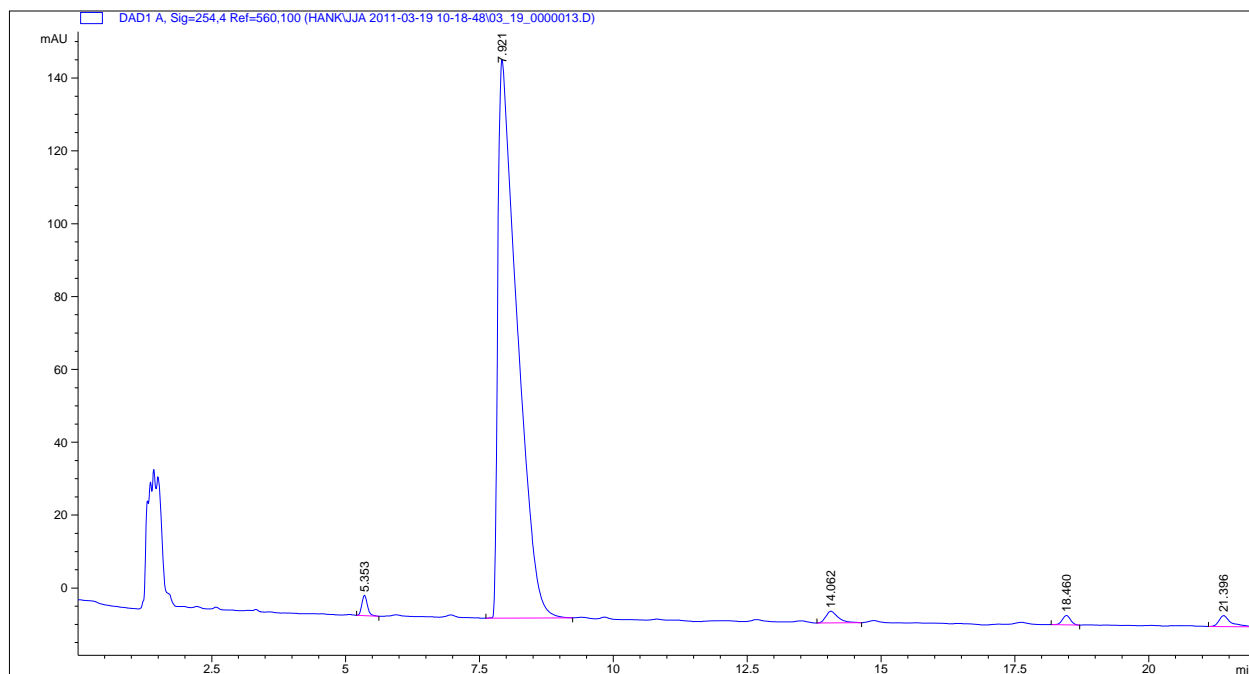

Analytical reverse-phase HPLC profile of compound **82c** prior to bioassay. Retention time = 7.92 min. Purity = 95.9%. Absorbance wavelength = 254 nm.

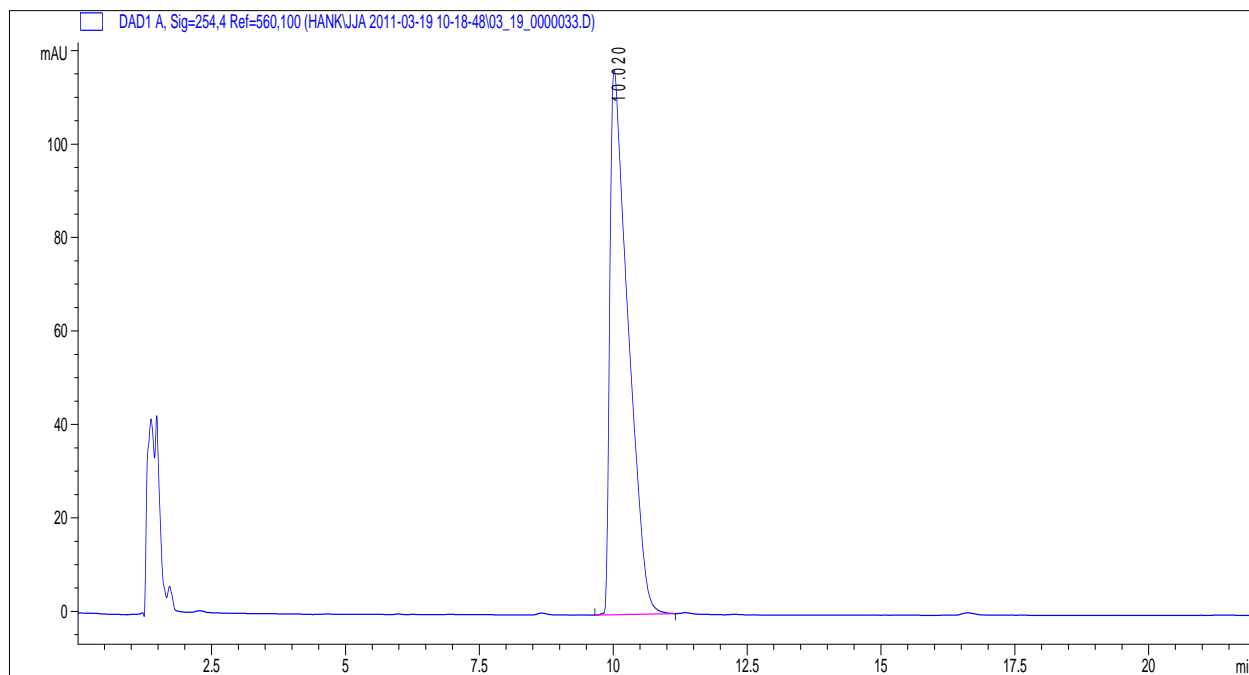

Analytical reverse-phase HPLC profile of compound **83a** prior to bioassay. Retention time = 10.0 min. Purity = 100%. Absorbance wavelength = 254 nm.

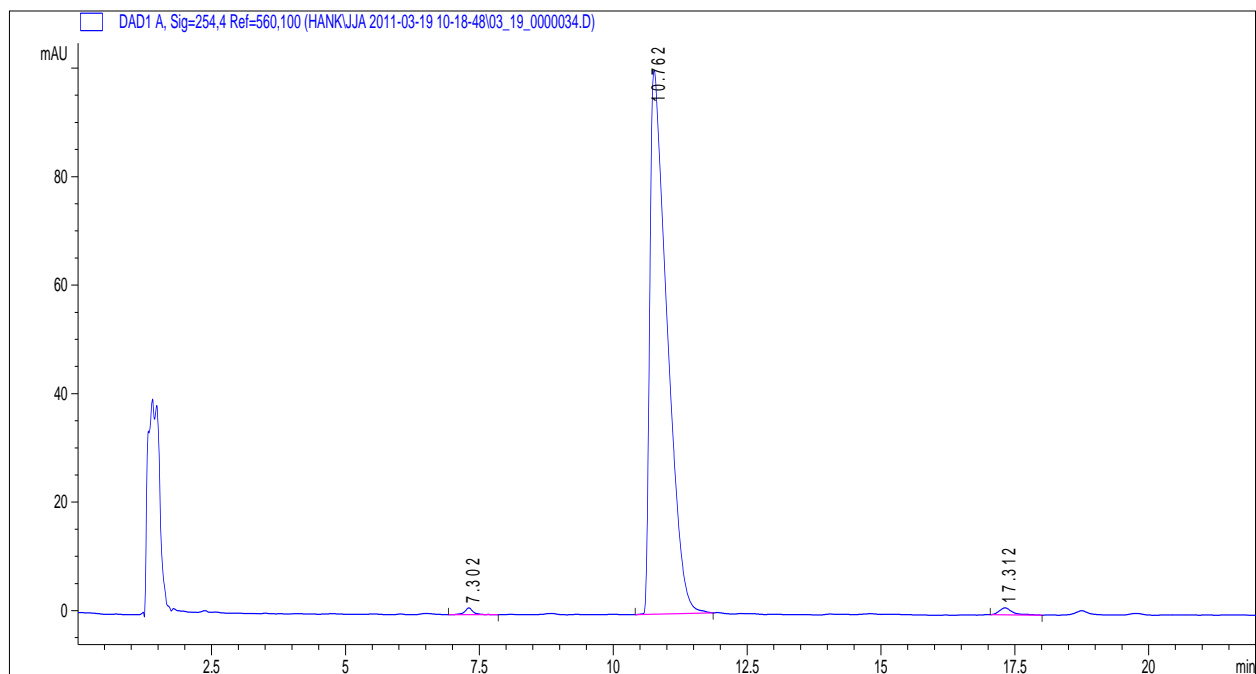

Analytical reverse-phase HPLC profile of compound **83c** prior to bioassay. Retention time = 10.8 min. Purity = 98.5%. Absorbance wavelength = 254 nm.

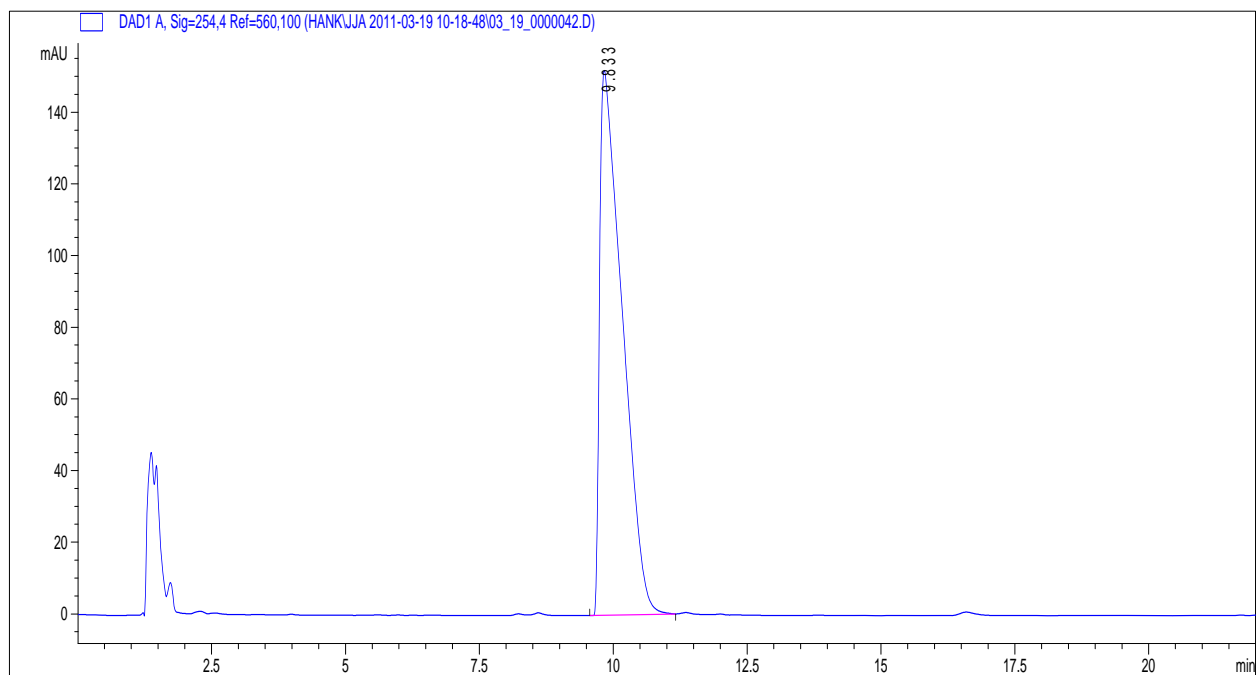

Analytical reverse-phase HPLC profile of compound **84a** prior to bioassay. Retention time = 9.83 min. Purity = 100%. Absorbance wavelength = 254 nm.

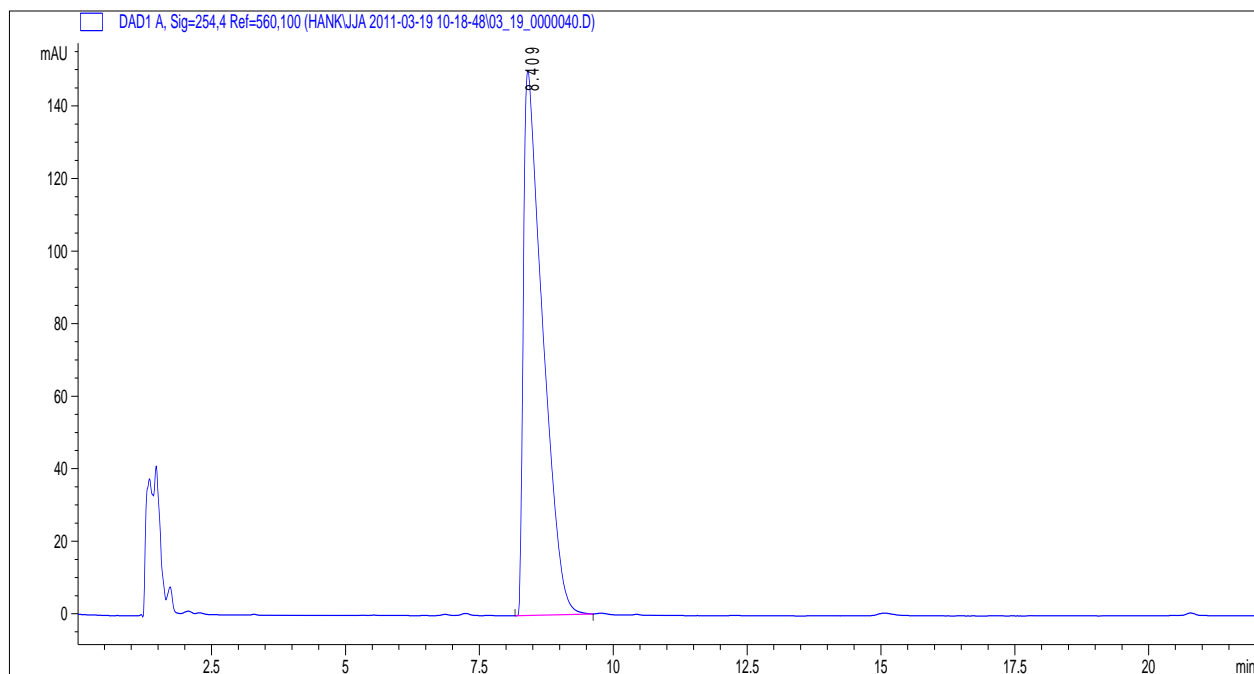

Analytical reverse-phase HPLC profile of compound **84b** prior to bioassay. Retention time = 9.11 min. Purity = 100%. Absorbance wavelength = 254 nm.

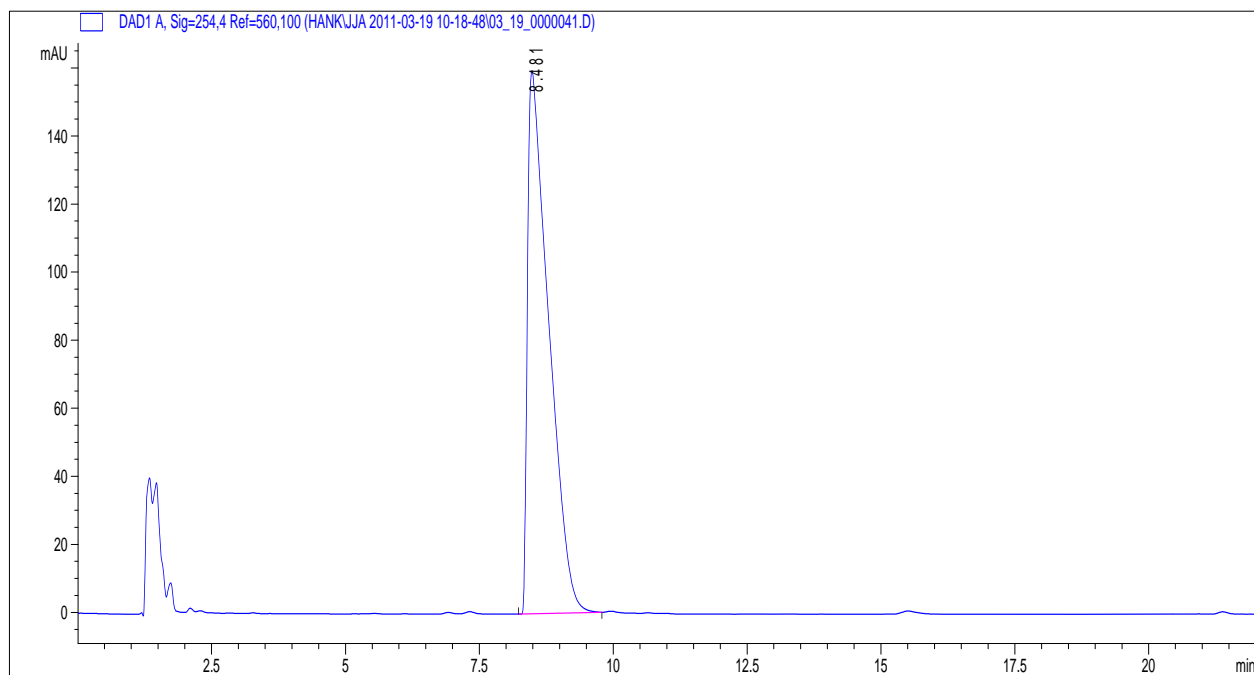

Analytical reverse-phase HPLC profile of compound **84c** prior to bioassay. Retention time = 8.48 min. Purity = 100%. Absorbance wavelength = 254 nm.

1. Donnelly, A.; Blagg, B. S. Novobiocin and additional inhibitors of the Hsp90 C-terminal nucleotide-binding pocket. *Curr. Med. Chem.* **2008**, *15*, 2702-2717.
2. Donnelly, A. C.; Mays, J. R.; Burlison, J. A.; Nelson, J. T.; Vielhauer, G.; Holzbeierlein, J.; Blagg, B. S. J. The design, synthesis, and evaluation of coumarin ring derivatives of the novobiocin scaffold that exhibit antiproliferative activity. *J. Org. Chem.* **2008**, *73*, 8901-8920.
3. Burlison, J. A.; Avila, C.; Vielhauer, G.; Lubbers, D. J.; Holzbeierlein, J.; Blagg, B. S. J. Development of novobiocin analogues that manifest anti-proliferative activity against several cancer cell lines. *J. Org. Chem.* **2008**, *73*, 2130-2137.
